# Supplementary material for: Increased intron retention is a post‐transcriptional signature associated with progressive aging and Alzheimer’s disease
Source: PubMed Central journal article supplement (PMC6516162; doi:10.1111/acel.12928), 2019-03-13
Supplement: ACEL-18-e12928-s003.pdf [file ACEL-18-e12928-s003.pdf]

**TableS2: Mean FPKM values of differential IR genes across different ages in fly**

| geneID      | GeneSym      | Coord                | D10_mean | D20_mean | D30_mean | D50_mean |
|-------------|--------------|----------------------|----------|----------|----------|----------|
| FBgn0000228 | Bsg25D       | 2L:5271727-5278548   | 16.85    | 20.17    | 20.53    | 19.96    |
| FBgn0000279 | CecC         | 3R:30216483-30216938 | 2.66     | 15.85    | 26.14    | 102.33   |
| FBgn0000316 | cin          | X:255673-258469      | 20.73    | 21.06    | 22.21    | 19.61    |
| FBgn0000319 | Chc          | X:15827985-15835490  | 89.82    | 93.59    | 100.35   | 98.94    |
| FBgn0000454 | Dip-B        | 3R:13782287-13785676 | 60.01    | 51.64    | 57.11    | 59.09    |
| FBgn0000464 | Lar          | 2L:19586622-19732069 | 50.27    | 55.80    | 54.96    | 53.33    |
| FBgn0000482 | dor          | X:1665051-1668451    | 8.05     | 7.61     | 8.57     | 7.59     |
| FBgn0000667 | Actn         | X:2023821-2042311    | 33.34    | 37.39    | 38.45    | 39.74    |
| FBgn0001137 | grk          | 2L:8431085-8433598   | 13.62    | 16.44    | 18.77    | 19.97    |
| FBgn0001202 | hk           | 2L:19030843-19033498 | 36.50    | 37.08    | 39.15    | 34.33    |
| FBgn0002431 | hyd          | 3R:9714622-9725615   | 29.38    | 35.96    | 36.17    | 38.15    |
| FBgn0002566 | lt           | 2L:22924794-22943135 | 37.09    | 44.87    | 40.30    | 41.08    |
| FBgn0002643 | mam          | 2R:13991202-14060356 | 18.61    | 21.53    | 20.84    | 23.13    |
| FBgn0002772 | Mlc1         | 3R:27657077-27660177 | 97.82    | 111.94   | 134.36   | 150.46   |
| FBgn0002774 | mle          | 2R:5974856-5980778   | 40.50    | 44.51    | 50.29    | 50.70    |
| FBgn0002891 | mus205       | 2R:7793624-7801044   | 2.43     | 2.84     | 3.21     | 3.81     |
| FBgn0003011 | ort          | 3R:19659747-19663672 | 9.60     | 9.99     | 9.21     | 9.56     |
| FBgn0003016 | osp          | 2L:14599195-14689340 | 13.79    | 16.59    | 15.28    | 14.51    |
| FBgn0003068 | per          | X:2685579-2692780    | 13.39    | 11.62    | 11.28    | 13.01    |
| FBgn0003071 | Pfk          | 2R:10109739-10117457 | 88.16    | 81.43    | 84.63    | 76.35    |
| FBgn0003134 | Pp1alpha-96A | 3R:24518269-24522331 | 83.77    | 86.25    | 78.17    | 92.83    |
| FBgn0003141 | pr           | 2L:20073718-20075458 | 42.67    | 38.24    | 37.01    | 33.09    |
| FBgn0003149 | Prm          | 3L:8732857-8745310   | 34.72    | 38.76    | 49.86    | 61.47    |
| FBgn0003218 | rdgB         | X:13762751-13779488  | 48.55    | 57.09    | 54.15    | 62.30    |
| FBgn0003248 | Rh2          | 3R:18899422-18901019 | 276.88   | 205.10   | 166.62   | 45.71    |
| FBgn0003656 | sws          | X:7956819-7968236    | 34.39    | 38.43    | 39.47    | 36.66    |
| FBgn0003744 | trc          | 3L:19830863-19834304 | 36.75    | 39.03    | 39.23    | 34.64    |
| FBgn0003748 | Treh         | 2R:21074017-21088945 | 159.71   | 154.94   | 133.51   | 110.54   |
| FBgn0003890 | betaTub97EF  | 3R:27967007-27988384 | 33.24    | 34.51    | 35.01    | 34.93    |
| FBgn0004028 | wupA         | X:18105567-18116922  | 104.19   | 122.65   | 143.36   | 143.50   |
| FBgn0004103 | Pp1-87B      | 3R:12423620-12425917 | 102.18   | 108.59   | 113.08   | 108.75   |
| FBgn0004169 | up           | X:13593473-13602578  | 84.25    | 90.97    | 116.78   | 121.65   |
| FBgn0004362 | HmgD         | 2R:21701457-21716727 | 32.03    | 36.56    | 42.13    | 40.95    |
| FBgn0004369 | Ptp99A       | 3R:29377645-29487131 | 27.43    | 32.00    | 31.95    | 33.66    |
| FBgn0004507 | GlyP         | 2L:2130812-2137296   | 138.37   | 129.15   | 130.27   | 127.08   |
| FBgn0004598 | Fur2         | X:16373085-16381782  | 39.54    | 45.80    | 46.19    | 45.57    |
| FBgn0004698 | mus210       | 2R:15311509-15318239 | 30.82    | 34.14    | 32.00    | 31.90    |
| FBgn0004784 | inaC         | 2R:16898534-16901575 | 359.82   | 333.08   | 359.21   | 306.41   |
| FBgn0004795 | retn         | 2R:23632609-23654820 | 15.13    | 15.95    | 18.95    | 16.34    |
| FBgn0004797 | mdy          | 2L:16816659-16826964 | 37.44    | 38.27    | 36.89    | 36.12    |
| FBgn0004914 | Hnf4         | 2L:8687225-8709611   | 30.29    | 32.14    | 33.90    | 34.02    |
| FBgn0004919 | gol          | 2R:25072626-25084347 | 68.98    | 67.68    | 60.80    | 53.20    |
| FBgn0005666 | bt           | 4:724399-776474      | 19.97    | 23.82    | 29.27    | 32.80    |
| FBgn0010051 | ltp-r83A     | 3R:5517116-5539411   | 21.81    | 24.87    | 25.93    | 25.52    |

| geneID      | GeneSym     | Coord                | D10_mean | D20_mean | D30_mean | D50_mean |
|-------------|-------------|----------------------|----------|----------|----------|----------|
| FBgn0010235 | Klc         | 3L:12746615-12750056 | 40.69    | 43.85    | 46.64    | 46.82    |
| FBgn0010278 | Ssrp        | 2R:23806360-23809004 | 7.89     | 8.38     | 9.79     | 11.74    |
| FBgn0010434 | cora        | 2R:19229062-19243751 | 54.79    | 63.06    | 65.20    | 66.19    |
| FBgn0010438 | mtSSB       | 3R:16204193-16205250 | 9.11     | 12.39    | 12.76    | 13.52    |
| FBgn0010482 | l(2)01289   | 2R:6721100-6740672   | 12.81    | 15.32    | 16.14    | 17.18    |
| FBgn0010551 | Phb2        | 2R:18819466-18822250 | 64.85    | 68.44    | 75.80    | 82.70    |
| FBgn0010750 | atms        | 3R:4750034-4777490   | 12.65    | 12.20    | 12.60    | 11.49    |
| FBgn0010905 | Spn         | 3L:2505244-2554292   | 23.17    | 26.86    | 26.18    | 24.49    |
| FBgn0011206 | bol         | 3L:9097628-9134405   | 42.54    | 40.92    | 36.80    | 46.94    |
| FBgn0011227 | ox          | 2R:12757132-12757529 | 302.99   | 254.96   | 219.92   | 222.62   |
| FBgn0011279 | Obp69a      | 3L:12396170-12396957 | 93.59    | 74.78    | 64.86    | 48.78    |
| FBgn0011286 | RyR         | 2R:8860363-8888097   | 17.93    | 17.53    | 19.40    | 18.26    |
| FBgn0011296 | l(2)efl     | 2R:23684650-23685543 | 52.29    | 72.36    | 108.39   | 132.59   |
| FBgn0011455 | l(3)neo18   | 3L:12137495-12138584 | 142.69   | 133.71   | 146.81   | 139.31   |
| FBgn0011745 | Arp1        | 3R:12691742-12694232 | 50.15    | 48.49    | 50.95    | 49.25    |
| FBgn0013762 | Cdk5        | 2R:15569527-15571417 | 19.35    | 18.93    | 19.60    | 18.65    |
| FBgn0013972 | Gycalpa99B  | 3R:29682502-29685758 | 50.11    | 37.61    | 39.49    | 27.27    |
| FBgn0014863 | Mlp84B      | 3R:7112849-7117732   | 46.89    | 52.80    | 66.35    | 67.45    |
| FBgn0014906 | Hydr2       | 2L:3163644-3169462   | 53.38    | 60.51    | 65.55    | 60.58    |
| FBgn0015034 | Cyp4e1      | 2R:8447450-8449745   | 5.70     | 4.60     | 4.08     | 3.33     |
| FBgn0015513 | mbc         | 3R:23781764-23801634 | 21.88    | 25.91    | 27.16    | 32.30    |
| FBgn0015571 | alpha-Est3  | 3R:7538971-7541631   | 16.19    | 15.13    | 17.07    | 23.13    |
| FBgn0015791 | Rab14       | 2L:14355144-14358764 | 97.46    | 97.05    | 103.19   | 93.47    |
| FBgn0016032 | lbn         | 2R:7049237-7051964   | 15.77    | 16.73    | 18.19    | 17.31    |
| FBgn0016696 | Pitslre     | 3L:20771527-20776931 | 85.85    | 96.11    | 99.86    | 96.32    |
| FBgn0016756 | Ubp64E      | 3L:5752972-5761886   | 39.68    | 48.18    | 53.46    | 54.58    |
| FBgn0017578 | Max         | 3L:19262231-19264184 | 16.57    | 19.68    | 19.94    | 19.83    |
| FBgn0019947 | Psn         | 3L:20432467-20435156 | 24.17    | 25.58    | 27.33    | 26.58    |
| FBgn0020370 | TppII       | 2R:13152884-13159141 | 20.32    | 20.90    | 22.12    | 21.53    |
| FBgn0020521 | pio         | 2R:24581244-24597862 | 51.21    | 53.84    | 54.24    | 52.66    |
| FBgn0020647 | KrT95D      | 3R:23997537-24031827 | 35.77    | 40.18    | 43.16    | 39.77    |
| FBgn0022029 | l(2)k01209  | 2R:17420406-17425679 | 18.17    | 19.29    | 21.47    | 21.74    |
| FBgn0022359 | Sodh-2      | 3R:10876383-10878257 | 29.49    | 27.98    | 20.80    | 19.36    |
| FBgn0023172 | RhoGEF2     | 2R:17027189-17044653 | 33.46    | 41.82    | 43.46    | 48.70    |
| FBgn0023213 | eIF4G       | 4:915296-930715      | 62.59    | 80.84    | 75.25    | 92.52    |
| FBgn0023458 | Rbcn-3A     | X:6240744-6255487    | 36.67    | 39.19    | 42.69    | 39.91    |
| FBgn0023549 | Mct1        | X:2189187-2205373    | 14.59    | 18.69    | 19.22    | 20.71    |
| FBgn0024689 | fws         | 2L:17478441-17481029 | 16.24    | 16.01    | 17.77    | 15.52    |
| FBgn0024811 | Crk         | 4:210223-213165      | 116.67   | 138.88   | 102.32   | 98.80    |
| FBgn0025592 | Gyk         | 3L:202097-205844     | 42.83    | 41.28    | 37.81    | 37.61    |
| FBgn0025684 | MFS18       | 2L:4446669-4448635   | 17.16    | 15.51    | 18.21    | 15.65    |
| FBgn0025687 | LKR         | 2L:7791174-7795959   | 12.51    | 13.34    | 14.07    | 18.81    |
| FBgn0025697 | santa-maria | 2L:7445354-7451244   | 73.82    | 77.40    | 77.80    | 84.98    |
| FBgn0026083 | tyf         | X:4117019-4130016    | 17.19    | 20.59    | 20.34    | 21.64    |
| FBgn0026086 | Adar        | X:1773724-1788065    | 58.18    | 62.91    | 55.17    | 56.58    |

| geneID      | GeneSym    | Coord                | D10_mean | D20_mean | D30_mean | D50_mean |
|-------------|------------|----------------------|----------|----------|----------|----------|
| FBgn0026439 | Eaat1      | 2L:9333566-9341925   | 162.65   | 157.53   | 128.84   | 119.68   |
| FBgn0026666 | l(1)G0136  | X:15734269-15735780  | 34.33    | 33.50    | 34.30    | 28.46    |
| FBgn0027074 | CG17324    | 2L:18819343-18822573 | 3.47     | 5.17     | 5.80     | 6.39     |
| FBgn0027529 | CG8920     | 2R:20319179-20325973 | 57.13    | 66.18    | 63.19    | 59.27    |
| FBgn0027565 | CG5498     | 3L:20382404-20384109 | 16.42    | 16.97    | 18.11    | 18.32    |
| FBgn0027596 | CG10249    | 2R:14901474-14928425 | 32.67    | 33.34    | 33.29    | 31.91    |
| FBgn0027657 | glob1      | 3R:15896925-15904521 | 124.70   | 134.50   | 127.48   | 212.73   |
| FBgn0027779 | VhaSFD     | 2L:16722882-16727826 | 119.97   | 118.60   | 125.59   | 124.93   |
| FBgn0027865 | Tsp96F     | 3R:25872899-25881427 | 28.85    | 34.23    | 31.15    | 35.83    |
| FBgn0027948 | msps       | 3R:16050800-16060675 | 39.56    | 42.60    | 43.66    | 39.37    |
| FBgn0028411 | Nxt1       | 2R:23811320-23811974 | 10.05    | 10.09    | 12.61    | 14.18    |
| FBgn0028425 | Jhl-21     | 2L:12051754-12056042 | 17.08    | 17.93    | 20.97    | 24.27    |
| FBgn0028427 | Ilk        | 3L:21216900-21219240 | 32.46    | 34.50    | 37.62    | 38.17    |
| FBgn0028429 | l-2        | 3L:9834366-9836805   | 19.68    | 20.95    | 23.11    | 24.22    |
| FBgn0028552 | gammaSnap1 | 2R:24047144-24048903 | 67.20    | 61.63    | 61.48    | 53.38    |
| FBgn0028646 | aralar1    | 3R:30445634-30455867 | 55.80    | 58.54    | 61.39    | 78.80    |
| FBgn0028663 | VhaM9.7-b  | 3L:21539861-21541215 | 94.44    | 89.05    | 104.18   | 110.45   |
| FBgn0028670 | Vha100-2   | 3R:18390322-18399169 | 60.86    | 57.11    | 65.18    | 59.75    |
| FBgn0028703 | Nhe3       | 2L:6677834-6684364   | 84.41    | 93.09    | 85.65    | 77.90    |
| FBgn0028704 | Nckx30C    | 2L:9711511-9746495   | 74.46    | 73.67    | 66.10    | 74.25    |
| FBgn0029088 | disp       | 3R:5849696-5856311   | 13.73    | 14.65    | 16.01    | 15.22    |
| FBgn0029174 | FKBP59     | 2L:9888004-9890119   | 36.78    | 38.47    | 38.22    | 34.13    |
| FBgn0029688 | Iva        | X:3955542-3965327    | 24.24    | 29.49    | 32.85    | 33.51    |
| FBgn0029771 | CG12730    | X:5516607-5518771    | 25.78    | 27.03    | 28.61    | 25.88    |
| FBgn0029820 | CG16721    | X:5879868-5883391    | 42.21    | 38.27    | 36.68    | 31.73    |
| FBgn0029824 | CG3726     | X:5917096-5941852    | 11.85    | 12.61    | 14.07    | 13.58    |
| FBgn0030013 | Gllspla2   | X:8157627-8159348    | 24.04    | 29.74    | 26.11    | 29.82    |
| FBgn0030073 | CG10962    | X:8972907-8974255    | 14.85    | 18.88    | 14.54    | 15.27    |
| FBgn0030081 | CG7246     | X:9078822-9081057    | 3.44     | 3.79     | 4.79     | 5.00     |
| FBgn0030228 | BTBD9      | X:10768536-10772154  | 12.04    | 12.92    | 14.10    | 14.05    |
| FBgn0030286 | CG1657     | X:11325384-11334071  | 28.39    | 29.14    | 32.72    | 30.67    |
| FBgn0030309 | CG1572     | X:11555049-11558654  | 56.00    | 69.19    | 85.94    | 121.46   |
| FBgn0030339 | Cyp28c1    | X:11839607-11841503  | 7.50     | 5.84     | 5.41     | 3.92     |
| FBgn0030348 | CG10352    | X:11875305-11877168  | 12.34    | 10.69    | 10.15    | 9.15     |
| FBgn0030484 | GstT4      | X:13404748-13409323  | 56.68    | 53.42    | 59.83    | 63.37    |
| FBgn0030528 | CG11095    | X:13811683-13812870  | 4.77     | 5.37     | 5.69     | 4.93     |
| FBgn0030555 | Fbxl4      | X:14234412-14237923  | 34.69    | 39.66    | 45.96    | 40.48    |
| FBgn0030670 | Pis        | X:15701450-15703770  | 257.03   | 237.35   | 232.47   | 193.07   |
| FBgn0030685 | Graf       | X:15751673-15760733  | 22.74    | 26.43    | 25.06    | 26.54    |
| FBgn0030745 | CG4239     | X:16385277-16388702  | 24.69    | 24.26    | 25.01    | 21.64    |
| FBgn0030791 | CG9132     | X:16796901-16800710  | 48.10    | 52.30    | 51.09    | 48.61    |
| FBgn0030887 | CG6867     | X:18023869-18028261  | 13.10    | 14.18    | 15.06    | 12.34    |
| FBgn0030897 | Frq1       | X:18155368-18174744  | 27.69    | 26.04    | 21.73    | 24.52    |
| FBgn0030954 | CCKLR-17D3 | X:18764482-18774027  | 4.90     | 4.96     | 4.52     | 3.72     |
| FBgn0031021 | CG12203    | X:19492420-19493337  | 69.92    | 72.91    | 74.93    | 64.13    |

| geneID      | GeneSym | Coord                | D10_mean | D20_mean | D30_mean | D50_mean |
|-------------|---------|----------------------|----------|----------|----------|----------|
| FBgn0031030 | Tao     | X:19569720-19579800  | 54.28    | 70.29    | 68.33    | 72.56    |
| FBgn0031057 | Ubqn    | X:19683807-19687658  | 47.77    | 52.58    | 57.05    | 56.04    |
| FBgn0031081 | Nep3    | X:19961296-19969323  | 22.67    | 23.58    | 23.43    | 19.04    |
| FBgn0031092 | CG9577  | X:20166672-20168080  | 21.52    | 19.54    | 19.34    | 17.35    |
| FBgn0031110 | Obp19b  | X:20416732-20417812  | 32.44    | 27.25    | 21.58    | 13.23    |
| FBgn0031304 | CG4552  | 2L:1129315-1132411   | 29.30    | 31.31    | 36.29    | 32.49    |
| FBgn0031322 | CG5001  | 2L:1185756-1196807   | 14.67    | 14.77    | 17.45    | 17.00    |
| FBgn0031453 | Bacc    | 2L:2752444-2757975   | 285.44   | 322.45   | 305.90   | 318.66   |
| FBgn0031456 | Trn-SR  | 2L:2759923-2763889   | 5.89     | 5.71     | 6.21     | 6.37     |
| FBgn0031604 | Elp3    | 2L:4444731-4446765   | 8.65     | 9.83     | 11.85    | 11.48    |
| FBgn0031632 | CG15628 | 2L:4821773-4828945   | 31.75    | 37.40    | 33.55    | 29.44    |
| FBgn0031637 | mxt     | 2L:4841481-4847295   | 52.37    | 59.55    | 67.45    | 64.67    |
| FBgn0031662 | CG3792  | 2L:4977311-4978567   | 30.76    | 32.34    | 33.80    | 32.59    |
| FBgn0031734 | CG11147 | 2L:5733674-5741244   | 94.06    | 99.05    | 84.21    | 78.80    |
| FBgn0031814 | retm    | 2L:6448463-6455929   | 75.93    | 71.59    | 64.73    | 63.36    |
| FBgn0031869 | CG18304 | 2L:6932544-6942814   | 3.02     | 3.56     | 3.89     | 3.98     |
| FBgn0031937 | CG13795 | 2L:7723044-7726298   | 33.45    | 35.27    | 33.73    | 43.87    |
| FBgn0031952 | cdc14   | 2L:7801667-7810703   | 43.30    | 49.33    | 50.39    | 43.80    |
| FBgn0031970 | CG7227  | 2L:7994387-7998151   | 1.46     | 1.89     | 4.19     | 2.57     |
| FBgn0031998 | SLC5A11 | 2L:8200464-8205132   | 27.59    | 28.36    | 23.14    | 16.54    |
| FBgn0032021 | CG7781  | 2L:8321279-8325409   | 108.77   | 102.12   | 91.89    | 78.03    |
| FBgn0032023 | CG14274 | 2L:8338286-8342056   | 25.94    | 24.64    | 22.21    | 18.74    |
| FBgn0032026 | CG7627  | 2L:8355677-8362469   | 17.69    | 18.42    | 19.38    | 19.56    |
| FBgn0032036 | CG13384 | 2L:8384454-8388804   | 37.83    | 37.66    | 37.61    | 33.73    |
| FBgn0032109 | CG17005 | 2L:9327743-9330332   | 18.54    | 9.85     | 3.31     | 1.92     |
| FBgn0032129 | jp      | 2L:9547719-9566750   | 34.17    | 39.70    | 39.95    | 39.31    |
| FBgn0032156 | CG13124 | 2L:9903278-9908633   | 84.65    | 99.67    | 102.92   | 109.03   |
| FBgn0032196 | CG5708  | 2L:10224456-10226808 | 38.59    | 39.34    | 36.49    | 34.35    |
| FBgn0032233 | dpr19   | 2L:10376167-10379905 | 26.74    | 25.71    | 24.63    | 18.19    |
| FBgn0032297 | CG17124 | 2L:10744074-10756325 | 57.56    | 55.27    | 45.30    | 43.31    |
| FBgn0032381 | Mal-B1  | 2L:11847225-11849169 | 10.51    | 10.24    | 8.56     | 8.97     |
| FBgn0032455 | Pih1D1  | 2L:12713275-12721843 | 28.19    | 30.63    | 31.10    | 28.77    |
| FBgn0032470 | CG5142  | 2L:13106806-13109468 | 5.37     | 8.52     | 14.38    | 12.26    |
| FBgn0032744 | Ttc19   | 2L:19043534-19045148 | 13.98    | 14.54    | 15.65    | 13.79    |
| FBgn0032797 | CG10186 | 2L:19508952-19517204 | 232.46   | 196.64   | 192.09   | 136.34   |
| FBgn0032836 | CG10680 | 2L:19964135-19965702 | 155.96   | 170.93   | 199.61   | 247.27   |
| FBgn0032859 | Arcp2   | 2L:20417056-20423027 | 19.76    | 22.95    | 24.86    | 24.77    |
| FBgn0032988 | Tif-IA  | 2L:22249875-22258260 | 31.04    | 36.52    | 35.28    | 33.92    |
| FBgn0033000 | CG14464 | 2R:4829245-4830587   | 64.04    | 59.78    | 57.48    | 59.35    |
| FBgn0033015 | d4      | 2R:5259003-5295965   | 31.82    | 35.03    | 36.12    | 33.49    |
| FBgn0033104 | CG15237 | 2R:6809043-6809766   | 13.97    | 13.84    | 14.08    | 13.10    |
| FBgn0033129 | Tsp42Eh | 2R:7033561-7034920   | 6.20     | 7.75     | 9.70     | 11.46    |
| FBgn0033133 | Tsp42Ek | 2R:7042655-7044710   | 13.63    | 14.61    | 12.84    | 15.16    |
| FBgn0033135 | Tsp42En | 2R:7052746-7054399   | 8.23     | 11.07    | 16.70    | 18.77    |
| FBgn0033194 | Vps13   | 2R:7566808-7580675   | 17.76    | 20.95    | 22.96    | 26.51    |

| geneID      | GeneSym    | Coord                | D10_mean | D20_mean | D30_mean | D50_mean |
|-------------|------------|----------------------|----------|----------|----------|----------|
| FBgn0033205 | CG2064     | 2R:7665827-7667343   | 22.19    | 23.63    | 26.79    | 30.87    |
| FBgn0033247 | Nup44A     | 2R:7988461-7991283   | 18.86    | 19.74    | 18.73    | 20.56    |
| FBgn0033266 | Socs44A    | 2R:8127574-8129476   | 15.19    | 14.08    | 16.00    | 16.37    |
| FBgn0033382 | Hydr1      | 2R:9132479-9135453   | 35.50    | 33.55    | 35.87    | 30.35    |
| FBgn0033486 | dmpd       | 2R:10117693-10121451 | 21.22    | 22.45    | 22.92    | 19.61    |
| FBgn0033639 | CG9003     | 2R:11641476-11651616 | 25.49    | 29.16    | 26.67    | 25.35    |
| FBgn0033672 | rho-7      | 2R:11986512-11988787 | 18.26    | 17.88    | 20.23    | 18.24    |
| FBgn0033734 | CG8520     | 2R:12422930-12425459 | 24.58    | 25.68    | 27.23    | 23.32    |
| FBgn0033809 | CG4630     | 2R:13215658-13219247 | 12.11    | 10.93    | 11.34    | 8.75     |
| FBgn0033844 | bbc        | 2R:13486633-13494862 | 61.04    | 64.85    | 69.25    | 66.67    |
| FBgn0033872 | CG6329     | 2R:13826370-13833503 | 162.51   | 145.70   | 115.25   | 114.68   |
| FBgn0034002 | CG8079     | 2R:15218378-15224795 | 16.10    | 19.40    | 21.03    | 20.21    |
| FBgn0034062 | CG8388     | 2R:16009400-16011438 | 3.80     | 3.94     | 4.49     | 4.62     |
| FBgn0034067 | CG8399     | 2R:16017736-16024627 | 32.04    | 33.75    | 37.12    | 37.66    |
| FBgn0034218 | CG18467    | 2R:17440296-17442483 | 11.91    | 10.16    | 10.41    | 8.26     |
| FBgn0034225 | veil       | 2R:17478157-17482118 | 13.73    | 12.61    | 13.42    | 10.19    |
| FBgn0034275 | CG5002     | 2R:17750292-17753214 | 10.76    | 13.12    | 16.27    | 23.16    |
| FBgn0034308 | CG10915    | 2R:18160719-18164746 | 22.93    | 25.59    | 24.42    | 21.96    |
| FBgn0034417 | CG15117    | 2R:19122230-19129300 | 9.55     | 11.38    | 12.11    | 16.80    |
| FBgn0034418 | CG15118    | 2R:19133726-19137169 | 56.77    | 58.64    | 61.12    | 53.55    |
| FBgn0034420 | CG10737    | 2R:19164142-19178223 | 70.24    | 80.52    | 87.94    | 82.38    |
| FBgn0034451 | TBCB       | 2R:19485493-19486837 | 17.07    | 17.95    | 18.71    | 17.43    |
| FBgn0034468 | Obp56a     | 2R:19697722-19698508 | 4.40     | 11.39    | 12.69    | 20.72    |
| FBgn0034598 | CG4266     | 2R:21161712-21168659 | 18.26    | 21.68    | 22.66    | 21.87    |
| FBgn0034605 | CG15661    | 2R:21215434-21217779 | 46.46    | 50.42    | 56.21    | 64.33    |
| FBgn0034655 | CG10307    | 2R:21688772-21690253 | 9.40     | 9.90     | 8.59     | 7.15     |
| FBgn0034660 | lox2       | 2R:21789622-21791580 | 6.10     | 4.43     | 3.12     | 3.29     |
| FBgn0034688 | CG11474    | 2R:22071233-22073443 | 20.55    | 18.65    | 18.97    | 18.43    |
| FBgn0034876 | wmd        | 2R:23544822-23548151 | 15.51    | 17.79    | 19.04    | 18.32    |
| FBgn0034897 | Sesn       | 2R:23713899-23734846 | 44.90    | 53.59    | 58.18    | 65.08    |
| FBgn0034943 | Fmo-1      | 2R:23962955-23964641 | 4.07     | 4.16     | 4.69     | 5.60     |
| FBgn0034951 | CG3860     | 2R:23992137-23995055 | 34.27    | 35.10    | 36.57    | 32.03    |
| FBgn0034958 | CG3907     | 2R:24019897-24022298 | 47.56    | 47.00    | 47.29    | 44.22    |
| FBgn0035026 | Fcp1       | 2R:24567986-24571821 | 11.11    | 11.04    | 10.95    | 8.78     |
| FBgn0035050 | ST6Gal     | 2R:24691421-24694386 | 9.38     | 12.29    | 13.13    | 12.09    |
| FBgn0035060 | Eps-15     | 2R:24768313-24775265 | 48.19    | 46.57    | 48.61    | 41.55    |
| FBgn0035064 | Aats-tyr-m | 2R:24781725-24783500 | 6.44     | 6.21     | 6.46     | 6.44     |
| FBgn0035146 | CG13893    | 3L:599093-604008     | 19.29    | 19.47    | 17.13    | 13.49    |
| FBgn0035147 | Gale       | 3L:648554-651311     | 55.97    | 66.05    | 65.22    | 73.95    |
| FBgn0035205 | CG2469     | 3L:1307223-1311805   | 29.17    | 29.51    | 31.69    | 28.15    |
| FBgn0035227 | CG12090    | 3L:1523413-1534034   | 56.09    | 61.12    | 70.22    | 79.08    |
| FBgn0035232 | CG12099    | 3L:1555362-1558484   | 52.83    | 54.67    | 53.29    | 55.75    |
| FBgn0035252 | CG7970     | 3L:1652749-1654238   | 38.47    | 38.00    | 38.36    | 35.27    |
| FBgn0035287 | CG13937    | 3L:1876550-1883041   | 26.94    | 27.97    | 24.38    | 20.08    |
| FBgn0035388 | CG2162     | 3L:3035195-3040469   | 18.61    | 20.85    | 20.02    | 18.92    |

| geneID      | GeneSym     | Coord                | D10_mean | D20_mean | D30_mean | D50_mean |
|-------------|-------------|----------------------|----------|----------|----------|----------|
| FBgn0035416 | gry         | 3L:3199089-3211348   | 12.97    | 13.69    | 14.44    | 14.47    |
| FBgn0035445 | CG12014     | 3L:3378267-3380083   | 7.11     | 7.22     | 9.21     | 9.58     |
| FBgn0035526 | CG1316      | 3L:4283850-4286865   | 38.84    | 44.91    | 42.79    | 41.35    |
| FBgn0035528 | CG15012     | 3L:4291207-4292246   | 87.34    | 82.57    | 90.36    | 83.68    |
| FBgn0035649 | CG10483     | 3L:5917904-5921316   | 14.32    | 12.15    | 11.77    | 9.33     |
| FBgn0035770 | pst         | 3L:7357274-7360263   | 94.38    | 92.95    | 99.98    | 143.83   |
| FBgn0035827 | Srp9        | 3L:7936372-7937258   | 26.12    | 27.57    | 27.08    | 26.91    |
| FBgn0035903 | CG6765      | 3L:8512766-8518738   | 11.45    | 12.77    | 13.57    | 11.59    |
| FBgn0035917 | Zasp66      | 3L:8624370-8638813   | 92.02    | 95.76    | 106.43   | 106.11   |
| FBgn0035921 | CG13305     | 3L:8644915-8646822   | 4.91     | 2.96     | 3.02     | 2.26     |
| FBgn0035978 | UGP         | 3L:9350866-9358935   | 125.42   | 133.49   | 142.25   | 171.14   |
| FBgn0035986 | CG4022      | 3L:9406178-9410832   | 6.04     | 7.47     | 7.25     | 6.98     |
| FBgn0035989 | CG3967      | 3L:9413595-9426758   | 37.19    | 36.89    | 36.00    | 32.43    |
| FBgn0035993 | Nf-YA       | 3L:9440055-9442267   | 7.05     | 8.05     | 8.88     | 8.66     |
| FBgn0036133 | CG7638      | 3L:11109689-11112117 | 22.35    | 21.12    | 23.04    | 18.96    |
| FBgn0036141 | wls         | 3L:11166619-11169625 | 16.70    | 16.92    | 17.67    | 15.60    |
| FBgn0036145 | CG7607      | 3L:11199619-11200587 | 70.88    | 52.37    | 47.06    | 24.04    |
| FBgn0036146 | CG14141     | 3L:11201350-11202158 | 32.15    | 27.39    | 22.01    | 12.33    |
| FBgn0036183 | CG6083      | 3L:11624527-11626125 | 7.66     | 8.17     | 7.39     | 5.87     |
| FBgn0036249 | CG11560     | 3L:12120018-12121185 | 6.22     | 6.91     | 8.06     | 7.46     |
| FBgn0036286 | CG10616     | 3L:12471727-12474428 | 14.57    | 16.33    | 17.89    | 17.17    |
| FBgn0036369 | CG10089     | 3L:13465551-13474787 | 18.10    | 19.20    | 19.07    | 15.88    |
| FBgn0036515 | CG12304     | 3L:15583637-15585347 | 23.62    | 23.56    | 26.37    | 29.54    |
| FBgn0036534 | DCP2        | 3L:15818733-15826423 | 31.07    | 36.53    | 34.04    | 36.52    |
| FBgn0036545 | GXIVsPLA2   | 3L:15955095-15956465 | 17.71    | 17.14    | 21.17    | 20.90    |
| FBgn0036569 | CG5414      | 3L:16100279-16103482 | 4.08     | 5.04     | 4.63     | 4.73     |
| FBgn0036875 | CG9449      | 3L:19492052-19497723 | 33.13    | 31.13    | 35.91    | 32.40    |
| FBgn0036945 | Ssk         | 3L:20188521-20189779 | 12.79    | 9.66     | 10.42    | 10.03    |
| FBgn0036986 | CG5282      | 3L:20424423-20426071 | 24.05    | 21.37    | 21.91    | 17.79    |
| FBgn0037060 | CG10508     | 3L:21210214-21216051 | 27.63    | 28.76    | 27.47    | 23.32    |
| FBgn0037084 | Syx6        | 2R:11219538-11222480 | 45.69    | 46.10    | 48.36    | 44.94    |
| FBgn0037098 | Wnk         | 3L:21543849-21554928 | 23.31    | 27.09    | 28.01    | 30.06    |
| FBgn0037295 | dpr16       | 3R:5150907-5170121   | 5.53     | 6.06     | 6.34     | 5.90     |
| FBgn0037313 | CG1161      | 3R:5355091-5356748   | 76.82    | 70.49    | 72.94    | 67.25    |
| FBgn0037339 | Pi4KIIalpha | 3R:5557662-5563652   | 25.25    | 28.87    | 29.13    | 30.01    |
| FBgn0037344 | CG2926      | 3R:5579300-5588380   | 16.17    | 18.78    | 19.48    | 19.66    |
| FBgn0037382 | Hpr1        | 3R:5818793-5821440   | 10.81    | 9.76     | 11.22    | 9.91     |
| FBgn0037513 | pyd3        | 3R:7747912-7750079   | 29.87    | 25.14    | 25.23    | 24.17    |
| FBgn0037530 | CG2943      | 3R:7903029-7907363   | 43.60    | 44.60    | 47.61    | 46.81    |
| FBgn0037574 | Coq2        | 3R:8314783-8316543   | 6.11     | 7.07     | 7.50     | 6.85     |
| FBgn0037655 | CG11984     | 3R:9010281-9014909   | 50.25    | 52.53    | 56.72    | 52.73    |
| FBgn0037680 | CG8121      | 3R:9335169-9337459   | 20.52    | 22.76    | 23.72    | 24.22    |
| FBgn0037709 | CG8199      | 3R:9555784-9557776   | 13.38    | 13.84    | 15.16    | 16.79    |
| FBgn0037756 | CG8507      | 3R:9791482-9793098   | 30.43    | 35.94    | 36.22    | 40.42    |
| FBgn0037892 | mRpl40      | 3R:11407917-11408756 | 13.72    | 12.72    | 14.72    | 13.80    |

| geneID      | GeneSym    | Coord                | D10_mean | D20_mean | D30_mean | D50_mean |
|-------------|------------|----------------------|----------|----------|----------|----------|
| FBgn0037913 | fabp       | 3R:11564057-11567054 | 511.83   | 441.16   | 482.46   | 455.13   |
| FBgn0037950 | HisCl1     | 3R:11787175-11789393 | 11.57    | 12.18    | 13.45    | 11.62    |
| FBgn0038105 | yellow-f2  | 3R:12993394-12995147 | 31.51    | 30.69    | 28.33    | 29.71    |
| FBgn0038149 | GILT1      | 3R:13398525-13401862 | 81.78    | 82.75    | 96.09    | 98.56    |
| FBgn0038179 | CG9312     | 3R:13765755-13767103 | 37.58    | 33.54    | 30.45    | 34.93    |
| FBgn0038181 | CG9297     | 3R:13771494-13779317 | 51.74    | 48.12    | 44.67    | 33.67    |
| FBgn0038199 | CCHa1      | 3R:14092503-14096835 | 4.78     | 5.43     | 6.00     | 4.64     |
| FBgn0038224 | CG3321     | 3R:14326946-14327735 | 241.60   | 209.96   | 226.79   | 200.72   |
| FBgn0038294 | Mf         | 3R:15170624-15181510 | 247.26   | 284.89   | 317.52   | 306.18   |
| FBgn0038302 | CG4210     | 3R:15213973-15214845 | 10.61    | 10.98    | 11.95    | 14.18    |
| FBgn0038564 | CG7785     | 3R:18021599-18023689 | 13.68    | 14.09    | 14.17    | 12.67    |
| FBgn0038652 | CG7720     | 3R:18759235-18795169 | 21.26    | 25.78    | 27.09    | 21.91    |
| FBgn0038693 | unc79      | 3R:19230763-19246130 | 62.82    | 61.22    | 66.37    | 57.50    |
| FBgn0038912 | CG6656     | 3R:21875292-21877788 | 50.27    | 58.49    | 61.15    | 49.46    |
| FBgn0038925 | Cchl       | 3R:22025974-22027480 | 51.84    | 47.08    | 53.61    | 46.68    |
| FBgn0039040 | CG13833    | 3R:23033283-23035563 | 78.12    | 54.63    | 42.93    | 30.31    |
| FBgn0039094 | CG10184    | 3R:23602506-23605495 | 65.29    | 83.53    | 59.23    | 54.78    |
| FBgn0039102 | SPE        | 3R:23686254-23688147 | 135.02   | 128.43   | 144.34   | 172.54   |
| FBgn0039135 | CG13603    | 3R:23985212-23986569 | 62.88    | 56.54    | 62.07    | 56.47    |
| FBgn0039141 | spas       | 3R:24038214-24042982 | 13.13    | 12.78    | 13.50    | 13.42    |
| FBgn0039153 | CG5463     | 3R:24128048-24130255 | 7.19     | 7.04     | 7.14     | 6.30     |
| FBgn0039178 | CG6356     | 3R:24283954-24288617 | 39.09    | 38.40    | 31.20    | 26.91    |
| FBgn0039215 | CG6695     | 3R:24655159-24659379 | 9.62     | 12.06    | 13.44    | 12.46    |
| FBgn0039229 | Saf-B      | 3R:24817463-24822350 | 48.55    | 54.22    | 52.15    | 45.42    |
| FBgn0039241 | CG11089    | 3R:24877044-24881478 | 107.20   | 147.25   | 138.04   | 248.83   |
| FBgn0039258 | beta4GalT7 | 3R:25023255-25024482 | 6.66     | 5.31     | 6.71     | 5.76     |
| FBgn0039259 | CG11781    | 3R:25024472-25025017 | 24.31    | 21.58    | 22.21    | 21.39    |
| FBgn0039316 | CG11893    | 3R:25289888-25291366 | 26.90    | 35.27    | 38.51    | 62.96    |
| FBgn0039357 | CG4743     | 3R:25679241-25680550 | 10.34    | 8.72     | 9.81     | 8.98     |
| FBgn0039494 | grass      | 3R:27157947-27159781 | 24.19    | 25.51    | 28.44    | 37.17    |
| FBgn0039529 | CG5612     | 3R:27623358-27626011 | 21.21    | 20.92    | 22.48    | 23.67    |
| FBgn0039562 | Gp93       | 3R:27948710-27952151 | 45.85    | 55.04    | 65.69    | 70.42    |
| FBgn0039732 | CG15525    | 3R:29996960-29997676 | 9.24     | 8.68     | 8.05     | 7.04     |
| FBgn0039789 | CG9717     | 3R:30584019-30587302 | 17.59    | 15.67    | 22.25    | 17.21    |
| FBgn0039864 | CG11550    | 3R:31678146-31679880 | 68.91    | 59.70    | 54.70    | 48.52    |
| FBgn0039890 | CG2316     | 4:184075-193829      | 104.01   | 115.07   | 99.81    | 95.71    |
| FBgn0039897 | CG1674     | 4:230729-245903      | 40.62    | 49.45    | 42.87    | 38.90    |
| FBgn0039902 | Zip102B    | 4:310929-314087      | 43.87    | 50.31    | 45.77    | 45.39    |
| FBgn0039907 | lgs        | 4:436956-443911      | 27.19    | 31.69    | 31.23    | 30.31    |
| FBgn0039908 | Asator     | 4:469408-488994      | 81.75    | 92.41    | 82.61    | 78.10    |
| FBgn0039916 | CG9935     | 4:636130-646556      | 34.55    | 45.12    | 39.79    | 35.29    |
| FBgn0039969 | Fis1       | 2R:5603586-5604834   | 140.19   | 144.41   | 127.06   | 127.64   |
| FBgn0039994 | conu       | 2R:4744347-4758048   | 45.23    | 52.21    | 46.58    | 49.97    |
| FBgn0040230 | dbo        | 3L:15826887-15832004 | 26.01    | 29.86    | 28.55    | 27.26    |
| FBgn0040337 | CG3021     | X:1026790-1028290    | 7.56     | 7.31     | 7.94     | 8.37     |

| geneID      | GeneSym | Coord                | D10_mean | D20_mean | D30_mean | D50_mean |
|-------------|---------|----------------------|----------|----------|----------|----------|
| FBgn0040394 | CG16903 | X:2078342-2080405    | 14.92    | 15.20    | 17.52    | 14.78    |
| FBgn0040588 | CG13841 | 3R:22766731-22767699 | 39.18    | 44.19    | 57.99    | 63.94    |
| FBgn0041205 | key     | 2R:24785513-24787411 | 21.47    | 24.06    | 25.13    | 23.64    |
| FBgn0041210 | HDAC4   | X:13262686-13285632  | 21.01    | 25.84    | 25.58    | 28.22    |
| FBgn0041775 | tral    | 3L:12515058-12520954 | 48.15    | 58.97    | 57.27    | 58.85    |
| FBgn0042135 | CG18812 | 2R:7716806-7735622   | 153.26   | 173.86   | 173.24   | 175.45   |
| FBgn0043005 | prt     | 3R:23696371-23699027 | 8.51     | 6.90     | 9.06     | 6.98     |
| FBgn0043070 | MESK2   | 2R:21502096-21517241 | 137.05   | 140.79   | 137.11   | 139.26   |
| FBgn0043792 | CG30427 | 2R:24928746-24937477 | 36.07    | 34.91    | 28.36    | 25.45    |
| FBgn0044048 | llp5    | 3L:9823348-9823897   | 27.58    | 22.84    | 13.49    | 4.55     |
| FBgn0045842 | yuri    | 2L:15257266-15264692 | 10.90    | 14.02    | 14.46    | 18.79    |
| FBgn0046247 | CG5938  | 3R:27274793-27277418 | 44.23    | 42.76    | 42.00    | 38.02    |
| FBgn0050021 | metro   | 2R:11226457-11232516 | 30.80    | 28.67    | 30.17    | 22.60    |
| FBgn0050051 | CG30051 | 2R:12436119-12436990 | 13.62    | 13.54    | 12.18    | 11.98    |
| FBgn0050052 | Obp49a  | 2R:12690058-12690955 | 131.75   | 151.35   | 143.31   | 122.31   |
| FBgn0050109 | CG30109 | 2R:17670081-17670748 | 11.35    | 9.89     | 11.89    | 13.80    |
| FBgn0050163 | Cpr60D  | 2R:24662681-24663406 | 15.92    | 13.20    | 10.39    | 7.45     |
| FBgn0050438 | CG30438 | 2R:5496673-5549543   | 17.51    | 18.66    | 13.32    | 10.70    |
| FBgn0050491 | CG30491 | 2R:7655071-7656770   | 9.78     | 10.45    | 12.11    | 9.56     |
| FBgn0050503 | CG30503 | 2R:7443823-7444627   | 89.47    | 76.60    | 70.08    | 71.84    |
| FBgn0051103 | CG31103 | 3R:25219317-25221444 | 48.87    | 46.56    | 44.45    | 47.02    |
| FBgn0051109 | CG31109 | 3R:25053368-25054653 | 10.21    | 10.25    | 11.02    | 9.43     |
| FBgn0051191 | CG31191 | 3R:20909212-20945530 | 7.61     | 9.30     | 9.28     | 8.84     |
| FBgn0051321 | CG31321 | 3R:14310361-14314412 | 18.41    | 19.70    | 18.01    | 15.27    |
| FBgn0051361 | dpr17   | 3R:12094875-12111420 | 8.39     | 9.93     | 9.83     | 9.25     |
| FBgn0051472 | sgll    | 3R:7810531-7811912   | 35.51    | 33.91    | 34.63    | 36.04    |
| FBgn0051619 | CG31619 | 2L:21684105-21729051 | 35.13    | 37.46    | 34.32    | 30.54    |
| FBgn0052068 | CG32068 | 3L:10663375-10664435 | 77.61    | 72.30    | 73.19    | 84.06    |
| FBgn0052085 | CG32085 | 3L:11650516-11680344 | 17.11    | 19.28    | 19.54    | 17.83    |
| FBgn0052523 | CG32523 | X:21217877-21218835  | 83.74    | 73.24    | 67.05    | 28.59    |
| FBgn0053051 | CG33051 | 3L:17426285-17427130 | 5.27     | 6.80     | 5.31     | 6.85     |
| FBgn0053110 | CG33110 | 3R:22570187-22580392 | 44.80    | 46.99    | 35.82    | 45.14    |
| FBgn0053519 | Unc-89  | 2R:23995542-24014254 | 14.01    | 15.78    | 18.09    | 15.82    |
| FBgn0053774 | CG33774 | 2R:9399752-9400329   | 53.67    | 56.63    | 51.50    | 45.68    |
| FBgn0058006 | CG40006 | 2L:22622416-22756349 | 44.80    | 41.00    | 29.39    | 27.54    |
| FBgn0058196 | Maf1    | 2R:1512809-1527095   | 113.91   | 122.01   | 107.67   | 95.71    |
| FBgn0062449 | CG13197 | 2R:11691284-11697785 | 14.60    | 17.78    | 16.80    | 16.41    |
| FBgn0067779 | dbr     | 2L:66481-71390       | 19.41    | 22.83    | 23.99    | 23.69    |
| FBgn0085377 | CG34348 | X:11339872-11344734  | 10.26    | 10.55    | 11.13    | 10.28    |
| FBgn0085384 | CG34355 | 3R:23803858-23860013 | 23.90    | 27.45    | 25.57    | 24.10    |
| FBgn0085446 | CG34417 | X:6540770-6589173    | 44.02    | 52.48    | 53.23    | 62.99    |
| FBgn0085452 | CG34423 | 2R:23358611-23359204 | 16.52    | 22.40    | 28.28    | 59.22    |
| FBgn0086656 | shrb    | 2R:9142145-9143914   | 63.90    | 68.96    | 73.36    | 81.62    |
| FBgn0086757 | cbs     | 2R:13450585-13453393 | 10.43    | 11.60    | 11.81    | 11.41    |
| FBgn0086785 | Vps36   | 3L:13511645-13513112 | 8.29     | 9.21     | 9.03     | 9.48     |

| geneID      | GeneSym     | Coord                | D10_mean | D20_mean | D30_mean | D50_mean |
|-------------|-------------|----------------------|----------|----------|----------|----------|
| FBgn0086906 | sls         | 3L:2039680-2115611   | 12.47    | 14.05    | 17.93    | 21.66    |
| FBgn0087035 | AGO2        | 3L:15554112-15561042 | 55.33    | 60.49    | 62.76    | 67.01    |
| FBgn0250757 | CG42235     | 3R:25907021-25921046 | 22.33    | 21.60    | 21.93    | 16.57    |
| FBgn0250789 | alpha-Spec  | 3L:1778484-1795328   | 85.44    | 93.47    | 100.86   | 95.86    |
| FBgn0250819 | CG33521     | 4:1185767-1192985    | 24.31    | 26.88    | 21.60    | 21.58    |
| FBgn0250851 | CG33981     | 2R:17773963-17781930 | 3.76     | 4.29     | 4.15     | 4.44     |
| FBgn0250906 | Pgk         | 2L:2746879-2753068   | 111.37   | 101.38   | 104.83   | 99.65    |
| FBgn0259163 | CG42268     | 3L:9734011-9760395   | 72.69    | 79.03    | 81.82    | 78.32    |
| FBgn0259209 | Mlp60A      | 2R:24074601-24078223 | 132.57   | 170.75   | 204.75   | 179.03   |
| FBgn0259214 | PMCA        | 4:328192-358917      | 149.94   | 169.42   | 147.33   | 149.22   |
| FBgn0259234 | Camta       | 2R:9446045-9480076   | 23.14    | 26.55    | 26.19    | 28.10    |
| FBgn0259678 | sqa         | 2R:9716347-9748121   | 13.74    | 13.64    | 14.97    | 15.53    |
| FBgn0259707 | CG42361     | 2R:24607672-24608788 | 36.50    | 36.22    | 40.00    | 30.50    |
| FBgn0259979 | CG17337     | 2R:5697871-5700212   | 34.76    | 40.61    | 38.46    | 37.02    |
| FBgn0259991 | CG42488     | 3R:25483097-25485481 | 10.85    | 10.31    | 11.43    | 10.02    |
| FBgn0260004 | Snmp1       | 3R:21165166-21168205 | 33.24    | 36.97    | 37.20    | 32.77    |
| FBgn0260439 | Pp2A-29B    | 2L:8366037-8370090   | 82.17    | 85.03    | 86.87    | 83.10    |
| FBgn0260467 | CG7071      | 3R:22362619-22364580 | 17.42    | 16.75    | 19.19    | 17.49    |
| FBgn0260639 | gammaTub23C | 2L:2972890-2974858   | 13.81    | 14.02    | 15.48    | 13.71    |
| FBgn0260935 | ird1        | 3R:9240756-9245869   | 16.04    | 14.77    | 16.32    | 13.61    |
| FBgn0260970 | CG42593     | X:7935895-7953883    | 18.96    | 21.57    | 22.33    | 21.87    |
| FBgn0260995 | CG42596     | 2R:3066498-3191011   | 59.64    | 64.24    | 58.01    | 49.68    |
| FBgn0261015 | Pif1A       | 3R:8774285-8801176   | 140.49   | 168.15   | 181.15   | 191.51   |
| FBgn0261436 | DhpD        | 3R:4227386-4229238   | 29.79    | 28.78    | 29.01    | 32.52    |
| FBgn0261451 | trol        | X:2470459-2545410    | 28.88    | 27.14    | 25.04    | 22.02    |
| FBgn0261532 | cdm         | 3R:18179274-18183479 | 42.02    | 39.50    | 40.76    | 35.20    |
| FBgn0261565 | Lmpt        | 3L:16865294-16922487 | 117.77   | 136.67   | 134.13   | 126.06   |
| FBgn0261625 | CG42708     | 2R:12670482-12679593 | 17.79    | 18.53    | 23.00    | 15.75    |
| FBgn0261674 | CG42709     | 3L:12790191-12796084 | 11.18    | 10.78    | 11.00    | 9.97     |
| FBgn0261788 | Ank2        | 3L:7655388-7718395   | 82.75    | 92.82    | 102.39   | 92.40    |
| FBgn0261794 | kcc         | 2R:23907653-23925066 | 165.55   | 150.43   | 142.55   | 121.81   |
| FBgn0261871 | dpr2        | 2L:10917014-10964153 | 6.14     | 5.73     | 5.93     | 4.49     |
| FBgn0262169 | magu        | 2R:10052540-10063712 | 16.25    | 16.91    | 16.82    | 18.65    |
| FBgn0262508 | CG43078     | 3L:8576807-8599617   | 57.87    | 67.35    | 75.89    | 71.30    |
| FBgn0262579 | Ect4        | 3L:8063873-8108897   | 120.51   | 136.24   | 146.83   | 165.13   |
| FBgn0262636 | Lin29       | 4:375639-395605      | 23.10    | 25.62    | 26.61    | 24.86    |
| FBgn0263006 | Ca-P60A     | 2R:23925076-23935884 | 192.26   | 162.82   | 148.80   | 132.97   |
| FBgn0263396 | sqd         | 3R:13634861-13646304 | 104.32   | 130.00   | 125.84   | 147.45   |
| FBgn0263593 | Lpin        | 2R:8136985-8156654   | 76.11    | 86.58    | 93.03    | 87.31    |
| FBgn0263748 | CG43673     | X:15779145-15780214  | 37.35    | 12.36    | 23.17    | 6.42     |
| FBgn0263980 | CG43729     | 2R:15401095-15471884 | 46.95    | 52.46    | 53.06    | 49.48    |
| FBgn0263998 | Ack-like    | 2R:13142833-13152677 | 14.21    | 15.99    | 17.60    | 17.44    |
| FBgn0264324 | spg         | 3R:28845269-28870439 | 17.47    | 20.62    | 20.02    | 20.70    |
| FBgn0264489 | CG43897     | 3L:9813846-9834345   | 123.71   | 147.98   | 152.08   | 156.63   |
| FBgn0264491 | how         | 3R:22042190-22079321 | 23.68    | 29.14    | 27.83    | 35.83    |

| geneID      | GeneSym    | Coord                | D10_mean | D20_mean | D30_mean | D50_mean |
|-------------|------------|----------------------|----------|----------|----------|----------|
| FBgn0264493 | rdx        | 3R:13967060-14032057 | 34.44    | 40.55    | 36.79    | 40.60    |
| FBgn0264607 | CaMKII     | 4:1035287-1053703    | 186.94   | 189.52   | 155.91   | 159.58   |
| FBgn0264695 | Mhc        | 2L:16766565-16788766 | 177.87   | 186.11   | 196.53   | 180.80   |
| FBgn0264894 | CG44085    | 2L:13261007-13284043 | 28.27    | 38.07    | 44.17    | 60.06    |
| FBgn0265002 | CG44153    | 2L:10064120-10180256 | 6.32     | 7.04     | 7.47     | 6.92     |
| FBgn0265045 | Strn-Mlck  | 2R:15946932-15989498 | 55.30    | 55.26    | 56.49    | 51.61    |
| FBgn0265767 | zyd        | X:23023316-23035550  | 40.35    | 42.50    | 43.28    | 42.82    |
| FBgn0265998 | Doa        | 3R:28888072-28922772 | 71.17    | 81.12    | 83.02    | 85.82    |
| FBgn0266346 | CngB       | 2R:21692690-21697152 | 13.28    | 12.33    | 12.81    | 9.92     |
| FBgn0266446 | CG45076    | 3R:10768000-10777374 | 54.99    | 73.08    | 93.89    | 116.89   |
| FBgn0266917 | CG16941    | 3R:16999383-17002355 | 9.40     | 10.71    | 11.87    | 11.47    |
| FBgn0267365 | l(2)SH0834 | 2L:10311049-10312099 | 31.33    | 28.60    | 29.73    | 26.07    |
| FBgn0267398 | Yeti       | 2R:1343402-1345119   | 76.07    | 90.10    | 79.40    | 81.82    |
| FBgn0267435 | chp        | 3R:31204179-31210730 | 342.51   | 363.48   | 388.75   | 359.23   |
