# Supplementary material for: Increased intron retention is a post‐transcriptional signature associated with progressive aging and Alzheimer’s disease
Source: PubMed Central journal article supplement (PMC6516162; doi:10.1111/acel.12928), 2019-03-13
Supplement: ACEL-18-e12928-s004.pdf [file ACEL-18-e12928-s004.pdf]

**Table S3: David functional annotation chart of differential IR genes identified in different ages of mouse frontal cortex (Lister et al., 2013)**

| S/N | GOTERMS_BP_DIRECT                                                           | Count | %      | p-value     | Benjamini value | TimePoint |
|-----|-----------------------------------------------------------------------------|-------|--------|-------------|-----------------|-----------|
| 1   | GO:0006810~transport                                                        | 28    | 15.642 | 0.003019695 | 0.920204161     | 2w_10w    |
| 2   | GO:0016310~phosphorylation                                                  | 13    | 7.263  | 0.006201975 | 0.925763397     | 2w_10w    |
| 3   | GO:0042692~muscle cell differentiation                                      | 3     | 1.676  | 0.009012379 | 0.919768179     | 2w_10w    |
| 4   | GO:0015031~protein transport                                                | 12    | 6.704  | 0.012586296 | 0.929152844     | 2w_10w    |
| 5   | GO:0006897~endocytosis                                                      | 6     | 3.352  | 0.019418467 | 0.962322997     | 2w_10w    |
| 6   | GO:0031122~cytoplasmic microtubule organization                             | 3     | 1.676  | 0.037585096 | 0.995193606     | 2w_10w    |
| 7   | GO:0007420~brain development                                                | 6     | 3.352  | 0.037673399 | 0.989808716     | 2w_10w    |
| 8   | GO:0009058~biosynthetic process                                             | 3     | 1.676  | 0.039515259 | 0.98520026      | 2w_10w    |
| 9   | GO:0001701~in utero embryonic development                                   | 7     | 3.911  | 0.043050226 | 0.983219155     | 2w_10w    |
| 10  | GO:0006397~mRNA processing                                                  | 15    | 6.494  | 1.55E-05    | 0.016140402     | 10w_22mo  |
| 11  | GO:0008380~RNA splicing                                                     | 11    | 4.762  | 3.77E-04    | 0.179356091     | 10w_22mo  |
| 12  | GO:0042088~T-helper 1 type immune response                                  | 3     | 1.299  | 0.00420465  | 0.770837862     | 10w_22mo  |
| 13  | GO:0070932~histone H3 deacetylation                                         | 3     | 1.299  | 0.008847589 | 0.902763153     | 10w_22mo  |
| 14  | GO:0000226~microtubule cytoskeleton organization                            | 5     | 2.165  | 0.022281969 | 0.991152544     | 10w_22mo  |
| 15  | GO:0031297~replication fork processing                                      | 3     | 1.299  | 0.028904225 | 0.994070961     | 10w_22mo  |
| 16  | GO:0032757~positive regulation of interleukin-8 production                  | 3     | 1.299  | 3.12E-02    | 0.991337435     | 10w_22mo  |
| 17  | GO:0042517~positive regulation of tyrosine phosphorylation of Stat3 protein | 3     | 1.299  | 4.36E-02    | 0.997118388     | 10w_22mo  |
| 18  | GO:1903849~positive regulation of aorta morphogenesis                       | 2     | 0.866  | 4.37E-02    | 0.994549203     | 10w_22mo  |
| 19  | GO:0016567~protein ubiquitination                                           | 9     | 3.896  | 4.94E-02    | 0.995103624     | 10w_22mo  |
| 20  | GO:0016569~covalent chromatin modification                                  | 17    | 3.820  | 1.66E-04    | 0.232992643     | 2w_22mo   |
| 21  | GO:0006397~mRNA processing                                                  | 17    | 3.820  | 1.33E-03    | 0.654784067     | 2w_22mo   |
| 22  | GO:0050790~regulation of catalytic activity                                 | 5     | 1.124  | 0.001971144 | 0.650871119     | 2w_22mo   |
| 23  | GO:0030030~cell projection organization                                     | 10    | 2.247  | 0.004616253 | 0.842884865     | 2w_22mo   |
| 24  | GO:0035556~intracellular signal transduction                                | 17    | 3.820  | 0.010340328 | 0.964068154     | 2w_22mo   |
| 25  | GO:0006520~cellular amino acid metabolic process                            | 4     | 0.899  | 0.013339346 | 0.972154869     | 2w_22mo   |
| 26  | GO:0006260~DNA replication                                                  | 8     | 1.798  | 0.015032276 | 0.96863415      | 2w_22mo   |
| 27  | GO:0016575~histone deacetylation                                            | 4     | 0.899  | 0.022304364 | 0.989016637     | 2w_22mo   |
| 28  | GO:0070932~histone H3 deacetylation                                         | 3     | 0.674  | 0.029340412 | 0.994978992     | 2w_22mo   |
| 29  | GO:0051726~regulation of cell cycle                                         | 7     | 1.573  | 0.03056182  | 0.993030219     | 2w_22mo   |

| S/N | GOTERMS_BP_DIRECT                                                                        | Count | %     | p-value     | Benjamini value | TimePoint |
|-----|------------------------------------------------------------------------------------------|-------|-------|-------------|-----------------|-----------|
| 30  | GO:0006139~nucleobase-containing compound metabolic process                              | 4     | 0.899 | 0.031332195 | 0.990248501     | 2w_22mo   |
| 31  | GO:0006974~cellular response to DNA damage stimulus                                      | 16    | 3.596 | 0.032035291 | 0.986980234     | 2w_22mo   |
| 32  | GO:0008033~tRNA processing                                                               | 6     | 1.348 | 0.033076668 | 0.984074348     | 2w_22mo   |
| 33  | GO:0016574~histone ubiquitination                                                        | 3     | 0.674 | 0.033763779 | 0.980265057     | 2w_22mo   |
| 34  | GO:0006941~striated muscle contraction                                                   | 3     | 0.674 | 0.033763779 | 0.980265057     | 2w_22mo   |
| 35  | GO:0007049~cell cycle                                                                    | 21    | 4.719 | 0.034967236 | 0.977553279     | 2w_22mo   |
| 36  | GO:0007420~brain development                                                             | 10    | 2.247 | 0.038952714 | 0.981186237     | 2w_22mo   |
| 37  | GO:0006418~tRNA aminoacylation for protein translation                                   | 4     | 0.899 | 0.039175746 | 0.976746404     | 2w_22mo   |
| 38  | GO:0006267~pre-replicative complex assembly involved in nuclear cell cycle DNA replicati | 2     | 0.449 | 0.041481952 | 0.976854283     | 2w_22mo   |
| 39  | GO:0016479~negative regulation of transcription from RNA polymerase I promoter           | 2     | 0.449 | 0.041481952 | 0.976854283     | 2w_22mo   |
| 40  | GO:1904358~positive regulation of telomere maintenance via telomere lengthening          | 2     | 0.449 | 0.041481952 | 0.976854283     | 2w_22mo   |
| 41  | GO:0007155~cell adhesion                                                                 | 17    | 3.820 | 0.049200543 | 0.985715769     | 2w_22mo   |

**Table S3: Human orthologs of the differential mouse IR genes identified between 10 weeks (young) & 22 months (old) frontal cortex (Lister et al., 2013)**

| S/N | Mouse Gene ID | MGI ID  | Mouse Symbol | Species | Human Gene ID | HGNC ID | Human Symbol | DIOPT Score | Weighted Score | Rank | Best Score |
|-----|---------------|---------|--------------|---------|---------------|---------|--------------|-------------|----------------|------|------------|
| 1   | 18132         | 107471  | Notch4       | Human   | 4855          | 7884    | NOTCH4       | 14          | 14.29          | high | Yes        |
| 2   | 70511         | 1917761 | Eef2kmt      | Human   | 196483        | 32221   | EEF2KMT      | 15          | 15.24          | high | Yes        |
| 3   | 751865        | 3802945 | Sap25        | Human   | 100316904     | 41908   | SAP25        | 11          | 11.5           | high | Yes        |
| 4   | 76265         | 1923515 | Tsen54       | Human   | 283989        | 27561   | TSEN54       | 15          | 15.24          | high | Yes        |
| 5   | 27390         | 1351603 | Mmel1        | Human   | 79258         | 14668   | MMEL1        | 11          | 11.37          | high | Yes        |
| 6   | 55981         | 1891825 | Pigb         | Human   | 9488          | 8959    | PIGB         | 13          | 13.28          | high | Yes        |
| 7   | 243538        | 2141635 | Cfap100      | Human   | 348807        | 26842   | CFAP100      | 15          | 15.3           | high | Yes        |
| 8   | 18846         | 107683  | Plxna3       | Human   | 55558         | 9101    | PLXNA3       | 14          | 14.3           | high | Yes        |
| 9   | 269400        | 2139369 | Rtel1        | Human   | 51750         | 15888   | RTEL1        | 13          | 13.33          | high | Yes        |
| 10  | 52150         | 1891291 | Kcnk6        | Human   | 9424          | 6281    | KCNK6        | 16          | 16.25          | high | Yes        |
| 11  | 109652        | 87913   | Acy1         | Human   | 95            | 177     | ACY1         | 13          | 13.28          | high | Yes        |
| 12  | 60534         | 1926471 | Fancg        | Human   | 2189          | 3588    | FANCG        | 14          | 14.29          | high | Yes        |
| 13  | 353287        | 2672935 | Clec18a      | Human   | 497190        | 33849   | CLEC18B      | 15          | 15.3           | high | Yes        |
| 14  | 245865        | 2444120 | Spag4        | Human   | 6676          | 11214   | SPAG4        | 14          | 14.27          | high | Yes        |
| 15  | 433809        | 2684989 | Rnf207       | Human   | 388591        | 32947   | RNF207       | 10          | 10.45          | high | Yes        |
| 16  | 433466        | 3845785 | Jmjd7        | Human   | 100137047     | 34397   | JMJD7        | 7           | 7.66           | high | Yes        |
| 17  | 27279         | 1351484 | Tnfrsf12a    | Human   | 51330         | 18152   | TNFRSF12A    | 13          | 13.26          | high | Yes        |
| 18  | 27404         | 1351668 | Abca8b       | Human   | 10351         | 38      | ABCA8        | 15          | 15.22          | high | Yes        |
| 19  | 18627         | 1195265 | Per2         | Human   | 8864          | 8846    | PER2         | 14          | 14.27          | high | Yes        |
| 20  | 70052         | 1917302 | Prpf4        | Human   | 9128          | 17349   | PRPF4        | 15          | 15.24          | high | Yes        |
| 21  | 100088        | 1913989 | Rcc1         | Human   | 1104          | 1913    | RCC1         | 15          | 15.24          | high | Yes        |
| 22  | 223646        | 2442664 | Naprt        | Human   | 93100         | 30450   | NAPRT        | 14          | 14.29          | high | Yes        |
| 23  | 30877         | 1353651 | Gnl3         | Human   | 26354         | 29931   | GNL3         | 16          | 16.25          | high | Yes        |
| 24  | 14885         | 1338799 | Gtf2h4       | Human   | 2968          | 4658    | GTF2H4       | 14          | 14.29          | high | Yes        |
| 25  | 67728         | 1914978 | Dph2         | Human   | 1802          | 3004    | DPH2         | 14          | 14.29          | high | Yes        |
| 26  | 78308         | 1925558 | Gpr108       | Human   | 56927         | 17829   | GPR108       | 14          | 14.37          | high | Yes        |
| 27  | 234686        | 2679008 | Fhod1        | Human   | 29109         | 17905   | FHOD1        | 13          | 13.29          | high | Yes        |
| 28  | 229600        | 2385885 | BC028528     | Human   | 79630         | 26258   | C1orf54      | 14          | 14.29          | high | Yes        |
| 29  | 668940        | 3710243 | Myh7b        | Human   | 57644         | 15906   | MYH7B        | 13          | 13.39          | high | Yes        |
| 30  | 22379         | 109569  | Fmnl3        | Human   | 91010         | 23698   | FMNL3        | 14          | 14.29          | high | Yes        |

| S/N | Mouse Gene ID | MGI ID  | Mouse Symbol | Species | Human Gene ID | HGNC ID | Human Symbol | DIOPT Score | Weighted Score | Rank | Best Score |
|-----|---------------|---------|--------------|---------|---------------|---------|--------------|-------------|----------------|------|------------|
| 31  | 72151         | 1919401 | Rfc5         | Human   | 5985          | 9973    | RFC5         | 15          | 15.3           | high | Yes        |
| 32  | 208146        | 2447762 | Yeats2       | Human   | 55689         | 25489   | YEATS2       | 15          | 15.3           | high | Yes        |
| 33  | 238023        | 3605542 | Hexdc        | Human   | 284004        | 26307   | HEXDC        | 12          | 12.32          | high | Yes        |
| 34  | 22130         | 105044  | Ttf1         | Human   | 7270          | 12397   | TTF1         | 12          | 12.28          | high | Yes        |
| 35  | 74322         | 1921572 | Cxxc1        | Human   | 30827         | 24343   | CXXC1        | 15          | 15.24          | high | Yes        |
| 36  | 69215         | 1916465 | Sat2         | Human   | 112483        | 23160   | SAT2         | 15          | 15.35          | high | Yes        |
| 37  | 104831        | 2144837 | Ptpn23       | Human   | 25930         | 14406   | PTPN23       | 15          | 15.24          | high | Yes        |
| 38  | 68241         | 1915491 | Mcrip2       | Human   | 84331         | 14142   | MCRIP2       | 13          | 13.27          | high | Yes        |
| 39  | 78797         | 1926047 | Ndor1        | Human   | 27158         | 29838   | NDOR1        | 15          | 15.24          | high | Yes        |
| 40  | 19649         | 1343102 | Robo3        | Human   | 64221         | 13433   | ROBO3        | 14          | 14.2           | high | Yes        |
| 41  | 223690        | 2444209 | Ankrd54      | Human   | 129138        | 25185   | ANKRD54      | 13          | 13.41          | high | Yes        |
| 42  | 16882         | 109152  | Lig3         | Human   | 3980          | 6600    | LIG3         | 14          | 14.23          | high | Yes        |
| 43  | 11512         | 87917   | Adcy6        | Human   | 112           | 237     | ADCY6        | 16          | 16.25          | high | Yes        |
| 44  | 110094        | 97577   | Phka2        | Human   | 5256          | 8926    | PHKA2        | 14          | 14.29          | high | Yes        |
| 45  | 52563         | 1098815 | Cdc23        | Human   | 8697          | 1724    | CDC23        | 15          | 15.3           | high | Yes        |
| 46  | 226432        | 1918944 | Ipo9         | Human   | 55705         | 19425   | IPO9         | 15          | 15.24          | high | Yes        |
| 47  | 106618        | 1921267 | Wdr90        | Human   | 197335        | 26960   | WDR90        | 13          | 13.28          | high | Yes        |
| 48  | 12667         | 1313268 | Chrd         | Human   | 8646          | 1949    | CHRD         | 14          | 14.21          | high | Yes        |
| 49  | 16801         | 1353510 | Arhgef1      | Human   | 9138          | 681     | ARHGEF1      | 13          | 13.3           | high | Yes        |
| 50  | 100126824     | 3818630 | Sco2         | Human   | 9997          | 10604   | SCO2         | 14          | 14.4           | high | Yes        |
| 51  | 97884         | 2145517 | B3galnt2     | Human   | 148789        | 28596   | B3GALNT2     | 15          | 15.24          | high | Yes        |
| 52  | 107650        | 1334433 | Pi4kb        | Human   | 5298          | 8984    | PI4KB        | 14          | 14.23          | high | Yes        |
| 53  | 69440         | 1916690 | Dennd6b      | Human   | 414918        | 32690   | DENND6B      | 14          | 14.29          | high | Yes        |
| 54  | 225870        | 2385695 | Rin1         | Human   | 9610          | 18749   | RIN1         | 16          | 16.25          | high | Yes        |
| 55  | 233405        | 2446237 | Vps33b       | Human   | 26276         | 12712   | VPS33B       | 15          | 15.3           | high | Yes        |
| 56  | 71957         | 1919207 | Ints11       | Human   | 54973         | 26052   | INTS11       | 13          | 13.36          | high | Yes        |
| 57  | 11781         | 1337063 | Ap4m1        | Human   | 9179          | 574     | AP4M1        | 14          | 14.27          | high | Yes        |
| 58  | 17350         | 101938  | Mlh1         | Human   | 4292          | 7127    | MLH1         | 14          | 14.29          | high | Yes        |
| 59  | 68556         | 1915806 | Uckl1        | Human   | 54963         | 15938   | UCKL1        | 14          | 14.37          | high | Yes        |
| 60  | 68718         | 1915968 | Rnf166       | Human   | 115992        | 28856   | RNF166       | 15          | 15.25          | high | Yes        |
| 61  | 230734        | 2387201 | Yrdc         | Human   | 79693         | 28905   | YRDC         | 15          | 15.24          | high | Yes        |

| S/N | Mouse Gene ID | MGI ID  | Mouse Symbol  | Species | Human Gene ID | HGNC ID | Human Symbol | DIOPT Score | Weighted Score | Rank | Best Score |
|-----|---------------|---------|---------------|---------|---------------|---------|--------------|-------------|----------------|------|------------|
| 62  | 72699         | 1919949 | Lime1         | Human   | 54923         | 26016   | LIME1        | 13          | 13.39          | high | Yes        |
| 63  | 231600        | 2444898 | Chfr          | Human   | 55743         | 20455   | CHFR         | 13          | 13.26          | high | Yes        |
| 64  | 100609        | 2140844 | Nsun5         | Human   | 55695         | 16385   | NSUN5        | 15          | 15.24          | high | Yes        |
| 65  | 13527         | 106039  | Dtna          | Human   | 1837          | 3057    | DTNA         | 14          | 14.14          | high | Yes        |
| 66  | 237926        | 3039628 | Rsad1         | Human   | 55316         | 25634   | RSAD1        | 15          | 15.24          | high | Yes        |
| 67  | 17761         | 1328328 | Map7          | Human   | 9053          | 6869    | MAP7         | 14          | 14.29          | high | Yes        |
| 68  | 67862         | 1915112 | 2310033P09Rik | Human   | 79169         | 19032   | C1orf35      | 14          | 14.29          | high | Yes        |
| 69  | 16179         | 107420  | Irak1         | Human   | 3654          | 6112    | IRAK1        | 14          | 14.37          | high | Yes        |
| 70  | 71947         | 1919197 | Tmem94        | Human   | 9772          | 28983   | TMEM94       | 14          | 14.31          | high | Yes        |
| 71  | 269951        | 96414   | Idh2          | Human   | 3418          | 5383    | IDH2         | 15          | 15.3           | high | Yes        |
| 72  | 16068         | 1333800 | Il18bp        | Human   | 10068         | 5987    | IL18BP       | 14          | 14.29          | high | Yes        |
| 73  | 80880         | 1098615 | Kank3         | Human   | 256949        | 24796   | KANK3        | 15          | 15.3           | high | Yes        |
| 74  | 73389         | 894659  | Hbp1          | Human   | 26959         | 23200   | HBP1         | 14          | 14.29          | high | Yes        |
| 75  | 72569         | 1919819 | Bbs5          | Human   | 129880        | 970     | BBS5         | 15          | 15.32          | high | Yes        |
| 76  | 105446        | 1917903 | Gmpr2         | Human   | 51292         | 4377    | GMPR2        | 16          | 16.25          | high | Yes        |
| 77  | 16897         | 102682  | Llgl1         | Human   | 3996          | 6628    | LLGL1        | 15          | 15.24          | high | Yes        |
| 78  | 22122         | 98857   | Tsta3         | Human   | 7264          | 12390   | TSTA3        | 14          | 14.28          | high | Yes        |
| 79  | 218442        | 2444223 | Serinc5       | Human   | 256987        | 18825   | SERINC5      | 14          | 14.29          | high | Yes        |
| 80  | 71177         | 1918427 | Ints13        | Human   | 55726         | 20174   | INTS13       | 14          | 14.29          | high | Yes        |
| 81  | 69080         | 1916330 | Gmppa         | Human   | 29926         | 22923   | GMPPA        | 15          | 15.24          | high | Yes        |
| 82  | 50782         | 1354739 | Rgs11         | Human   | 8786          | 9993    | RGS11        | 15          | 15.3           | high | Yes        |
| 83  | 382073        | 2685960 | Ccdc84        | Human   | 338657        | 30460   | CCDC84       | 14          | 14.29          | high | Yes        |
| 84  | 67392         | 1914642 | 4833420G17Rik | Human   | 375444        | 24738   | C5orf34      | 14          | 14.29          | high | Yes        |
| 85  | 228410        | 1351825 | Cstf3         | Human   | 1479          | 2485    | CSTF3        | 14          | 14.29          | high | Yes        |
| 86  | 18432         | 106181  | Mybbp1a       | Human   | 10514         | 7546    | MYBBP1A      | 14          | 14.29          | high | Yes        |
| 87  | 24051         | 1346523 | Sgcb          | Human   | 6443          | 10806   | SGCB         | 14          | 14.29          | high | Yes        |
| 88  | 12747         | 107403  | Clk1          | Human   | 1195          | 2068    | CLK1         | 14          | 14.37          | high | Yes        |
| 89  | 16978         | 1342770 | Lrrfip1       | Human   | 9208          | 6702    | LRRFIP1      | 13          | 13.29          | high | Yes        |
| 90  | 228961        | 2448523 | Npepl1        | Human   | 79716         | 16244   | NPEPL1       | 14          | 14.29          | high | Yes        |
| 91  | 17294         | 96968   | Mest          | Human   | 4232          | 7028    | MEST         | 14          | 14.29          | high | Yes        |
| 92  | 112403        | 1890444 | Dxo           | Human   | 1797          | 2992    | DXO          | 14          | 14.29          | high | Yes        |

| S/N | Mouse Gene ID | MGI ID  | Mouse Symbol  | Species | Human Gene ID | HGNC ID | Human Symbol | DIOPT Score | Weighted Score | Rank | Best Score |
|-----|---------------|---------|---------------|---------|---------------|---------|--------------|-------------|----------------|------|------------|
| 93  | 66921         | 1914171 | Prpf38b       | Human   | 55119         | 25512   | PRPF38B      | 14          | 14.29          | high | Yes        |
| 94  | 72199         | 1919449 | Mms19         | Human   | 64210         | 13824   | MMS19        | 14          | 14.21          | high | Yes        |
| 95  | 269615        | 2443078 | Plch2         | Human   | 9651          | 29037   | PLCH2        | 14          | 14.3           | high | Yes        |
| 96  | 66627         | 1913877 | Ogfod2        | Human   | 79676         | 25823   | OGFOD2       | 14          | 14.21          | high | Yes        |
| 97  | 217588        | 1918320 | Mbip          | Human   | 51562         | 20427   | MBIP         | 15          | 15.3           | high | Yes        |
| 98  | 69315         | 1916565 | 1700001L19Rik | Human   | 134121        | 27028   | C5orf49      | 14          | 14.29          | high | Yes        |
| 99  | 74549         | 1921799 | Mau2          | Human   | 23383         | 29140   | MAU2         | 13          | 13.33          | high | Yes        |
| 100 | 224619        | 3042141 | Traf7         | Human   | 84231         | 20456   | TRAF7        | 14          | 14.29          | high | Yes        |
| 101 | 67367         | 1914617 | Paxbp1        | Human   | 94104         | 13579   | PAXBP1       | 14          | 14.29          | high | Yes        |
| 102 | 16173         | 107936  | Il18          | Human   | 3606          | 5986    | IL18         | 11          | 11.15          | high | Yes        |
| 103 | 71382         | 1918632 | Pex1          | Human   | 5189          | 8850    | PEX1         | 14          | 14.29          | high | Yes        |
| 104 | 320267        | 2443699 | Fubp3         | Human   | 8939          | 4005    | FUBP3        | 16          | 16.25          | high | Yes        |
| 105 | 50793         | 1354944 | Orc3          | Human   | 23595         | 8489    | ORC3         | 14          | 14.29          | high | Yes        |
| 106 | 60507         | 1931441 | Qtrt1         | Human   | 81890         | 23797   | QTRT1        | 14          | 14.29          | high | Yes        |
| 107 | 21856         | 1343262 | Timm44        | Human   | 10469         | 17316   | TIMM44       | 15          | 15.24          | high | Yes        |
| 108 | 231003        | 2678948 | Klhl17        | Human   | 339451        | 24023   | KLHL17       | 13          | 13.47          | high | Yes        |
| 109 | 225392        | 1918044 | Rell2         | Human   | 285613        | 26902   | RELL2        | 14          | 14.29          | high | Yes        |
| 110 | 94178         | 1890498 | Mcoln1        | Human   | 57192         | 13356   | MCOLN1       | 14          | 14.29          | high | Yes        |
| 111 | 67420         | 1914670 | Far1          | Human   | 84188         | 26222   | FAR1         | 15          | 15.3           | high | Yes        |
| 112 | 17537         | 108519  | Meis3         | Human   | 56917         | 29537   | MEIS3        | 14          | 14.4           | high | Yes        |
| 113 | 74011         | 1921261 | Slc25a27      | Human   | 9481          | 21065   | SLC25A27     | 15          | 15.3           | high | Yes        |
| 114 | 216148        | 106180  | Shc2          | Human   | 25759         | 29869   | SHC2         | 13          | 13.39          | high | Yes        |
| 115 | 66264         | 1913514 | Ccdc28b       | Human   | 79140         | 28163   | CCDC28B      | 13          | 13.39          | high | Yes        |
| 116 | 93843         | 1347357 | Pnck          | Human   | 139728        | 13415   | PNCK         | 15          | 15.24          | high | Yes        |
| 117 | 67414         | 1914664 | Mfn1          | Human   | 55669         | 18262   | MFN1         | 14          | 14.29          | high | Yes        |
| 118 | 71514         | 1918764 | Sfpq          | Human   | 6421          | 10774   | SFPQ         | 14          | 14.3           | high | Yes        |
| 119 | 109229        | 1924483 | Fam118b       | Human   | 79607         | 26110   | FAM118B      | 14          | 14.27          | high | Yes        |
| 120 | 20383         | 98285   | Srsf3         | Human   | 6428          | 10785   | SRSF3        | 14          | 14.4           | high | Yes        |
| 121 | 665113        | 1916264 | Tnik          | Human   | 23043         | 30765   | TNIK         | 14          | 14.4           | high | Yes        |
| 122 | 14430         | 95638   | Galt          | Human   | 2592          | 4135    | GALT         | 15          | 15.3           | high | Yes        |
| 123 | 13198         | 109247  | Ddit3         | Human   | 1649          | 2726    | DDIT3        | 14          | 14.29          | high | Yes        |

| S/N | Mouse Gene ID | MGI ID  | Mouse Symbol  | Species | Human Gene ID | HGNC ID | Human Symbol | DIOPT Score | Weighted Score | Rank | Best Score |
|-----|---------------|---------|---------------|---------|---------------|---------|--------------|-------------|----------------|------|------------|
| 124 | 330671        | 2652891 | B4galnt4      | Human   | 338707        | 26315   | B4GALNT4     | 15          | 15.3           | high | Yes        |
| 125 | 245877        | 2384297 | Map7d1        | Human   | 55700         | 25514   | MAP7D1       | 15          | 15.3           | high | Yes        |
| 126 | 83766         | 1933548 | Actl6b        | Human   | 51412         | 160     | ACTL6B       | 16          | 16.25          | high | Yes        |
| 127 | 15499         | 96238   | Hsf1          | Human   | 3297          | 5224    | HSF1         | 15          | 15.3           | high | Yes        |
| 128 | 69207         | 1916457 | Srsf11        | Human   | 9295          | 10782   | SRSF11       | 15          | 15.3           | high | Yes        |
| 129 | 14979         | 95911   | H2-Ke6        | Human   | 7923          | 3554    | HSD17B8      | 15          | 15.3           | high | Yes        |
| 130 | 17827         | 103025  | Mtx1          | Human   | 4580          | 7504    | MTX1         | 14          | 14.29          | high | Yes        |
| 131 | 108155        | 1339639 | Ogt           | Human   | 8473          | 8127    | OGT          | 14          | 14.21          | high | Yes        |
| 132 | 50755         | 1354699 | Fbxo18        | Human   | 84893         | 13620   | FBXO18       | 15          | 15.24          | high | Yes        |
| 133 | 84505         | 1934229 | Setdb1        | Human   | 9869          | 10761   | SETDB1       | 15          | 15.24          | high | Yes        |
| 134 | 30840         | 1354705 | Fbxl6         | Human   | 26233         | 13603   | FBXL6        | 15          | 15.24          | high | Yes        |
| 135 | 227656        | 2684957 | Rexo4         | Human   | 57109         | 12820   | REXO4        | 16          | 16.25          | high | Yes        |
| 136 | 56389         | 1928483 | Stx5a         | Human   | 6811          | 11440   | STX5         | 13          | 13.28          | high | Yes        |
| 137 | 66593         | 1913843 | Diablo        | Human   | 56616         | 21528   | DIABLO       | 13          | 13.26          | high | Yes        |
| 138 | 12531         | 99701   | Cdc25b        | Human   | 994           | 1726    | CDC25B       | 15          | 15.24          | high | Yes        |
| 139 | 68554         | 1915804 | Cebpzoz       | Human   | 100505876     | 49288   | CEBPZOS      | 13          | 13.29          | high | Yes        |
| 140 | 245857        | 2683546 | Ssh3          | Human   | 54961         | 30581   | SSH3         | 16          | 16.25          | high | Yes        |
| 141 | 228356        | 1915079 | 1110051M20Rik | Human   | 79096         | 28720   | C11orf49     | 14          | 14.29          | high | Yes        |
| 142 | 53861         | 1858211 | Zranb2        | Human   | 9406          | 13058   | ZRANB2       | 12          | 12.33          | high | Yes        |
| 143 | 225027        | 1926232 | Srsf7         | Human   | 6432          | 10789   | SRSF7        | 15          | 15.3           | high | Yes        |
| 144 | 434437        | 3646700 | Amt           | Human   | 275           | 473     | AMT          | 15          | 15.24          | high | Yes        |
| 145 | 320816        | 2444796 | Ankrd16       | Human   | 54522         | 23471   | ANKRD16      | 13          | 13.39          | high | Yes        |
| 146 | 83486         | 1933204 | Rbm5          | Human   | 10181         | 9902    | RBM5         | 16          | 16.25          | high | Yes        |
| 147 | 21357         | 103027  | Tarbp2        | Human   | 6895          | 11569   | TARBP2       | 14          | 14.27          | high | Yes        |
| 148 | 11488         | 1098667 | Adam11        | Human   | 4185          | 189     | ADAM11       | 15          | 15.24          | high | Yes        |
| 149 | 18803         | 97615   | Plcg1         | Human   | 5335          | 9065    | PLCG1        | 15          | 15.24          | high | Yes        |
| 150 | 76900         | 1924150 | Ssbp4         | Human   | 170463        | 15676   | SSBP4        | 15          | 15.3           | high | Yes        |
| 151 | 110157        | 97847   | Raf1          | Human   | 5894          | 9829    | RAF1         | 13          | 13.26          | high | Yes        |
| 152 | 70999         | 1918249 | Naa40         | Human   | 79829         | 25845   | NAA40        | 15          | 15.24          | high | Yes        |
| 153 | 70430         | 1917680 | Tbce          | Human   | 6905          | 11582   | TBCE         | 15          | 15.24          | high | Yes        |
| 154 | 68183         | 1915433 | Bcas2         | Human   | 10286         | 975     | BCAS2        | 14          | 14.29          | high | Yes        |

| S/N | Mouse Gene ID | MGI ID  | Mouse Symbol  | Species | Human Gene ID | HGNC ID | Human Symbol | DIOPT Score | Weighted Score | Rank | Best Score |
|-----|---------------|---------|---------------|---------|---------------|---------|--------------|-------------|----------------|------|------------|
| 155 | 225861        | 2444704 | Snx32         | Human   | 254122        | 26423   | SNX32        | 15          | 15.3           | high | Yes        |
| 156 | 24068         | 1344414 | Sra1          | Human   | 10011         | 11281   | SRA1         | 12          | 12.35          | high | Yes        |
| 157 | 68278         | 1915528 | Ddx39         | Human   | 10212         | 17821   | DDX39A       | 13          | 13.29          | high | Yes        |
| 158 | 66625         | 1913875 | Pnir          | Human   | 25957         | 21222   | PNISR        | 14          | 14.29          | high | Yes        |
| 159 | 230101        | 2654325 | Gba2          | Human   | 57704         | 18986   | GBA2         | 15          | 15.24          | high | Yes        |
| 160 | 225160        | 1919668 | Thoc1         | Human   | 9984          | 19070   | THOC1        | 14          | 14.29          | high | Yes        |
| 161 | 234407        | 1924348 | Colgalt1      | Human   | 79709         | 26182   | COLGALT1     | 15          | 15.3           | high | Yes        |
| 162 | 83768         | 1933213 | Dpp7          | Human   | 29952         | 14892   | DPP7         | 15          | 15.24          | high | Yes        |
| 163 | 14073         | 109609  | Faah          | Human   | 2166          | 3553    | FAAH         | 14          | 14.34          | high | Yes        |
| 164 | 654795        | 1916876 | Sdr39u1       | Human   | 56948         | 20275   | SDR39U1      | 14          | 14.29          | high | Yes        |
| 165 | 19082         | 108411  | Prkag1        | Human   | 5571          | 9385    | PRKAG1       | 15          | 15.2           | high | Yes        |
| 166 | 51885         | 1196293 | Tubgcp4       | Human   | 27229         | 16691   | TUBGCP4      | 15          | 15.3           | high | Yes        |
| 167 | 216190        | 2384914 | Appl2         | Human   | 55198         | 18242   | APPL2        | 13          | 13.26          | high | Yes        |
| 168 | 319278        | 2441788 | A230050P20Rik | Human   | 55337         | 25649   | C19orf66     | 14          | 14.29          | high | Yes        |
| 169 | 108062        | 1343054 | Cstf2         | Human   | 1478          | 2484    | CSTF2        | 15          | 15.3           | high | Yes        |
| 170 | 67399         | 1914649 | Pdlim7        | Human   | 9260          | 22958   | PDLIM7       | 15          | 15.24          | high | Yes        |
| 171 | 23821         | 1346542 | Bace1         | Human   | 23621         | 933     | BACE1        | 15          | 15.24          | high | Yes        |
| 172 | 54160         | 1858683 | Copg2         | Human   | 26958         | 2237    | COPG2        | 11          | 11.53          | high | Yes        |
| 173 | 66826         | 109626  | Taz           | Human   | 6901          | 11577   | TAZ          | 14          | 14.34          | high | Yes        |
| 174 | 78670         | 1925920 | Plekhj1       | Human   | 55111         | 18211   | PLEKHJ1      | 13          | 13.36          | high | Yes        |
| 175 | 15369         | 109373  | Hmox2         | Human   | 3163          | 5014    | HMOX2        | 15          | 15.24          | high | Yes        |
| 176 | 22221         | 104889  | Ubp1          | Human   | 7342          | 12507   | UBP1         | 15          | 15.3           | high | Yes        |
| 177 | 64085         | 1929897 | Clstn2        | Human   | 64084         | 17448   | CLSTN2       | 16          | 16.25          | high | Yes        |
| 178 | 68597         | 1915847 | Ccdc167       | Human   | 154467        | 21239   | CCDC167      | 13          | 13.39          | high | Yes        |
| 179 | 227632        | 1924627 | Kcnt1         | Human   | 57582         | 18865   | KCNT1        | 16          | 16.25          | high | Yes        |
| 180 | 214951        | 2384891 | Rhbd1         | Human   | 9028          | 10007   | RHBDL1       | 15          | 15.3           | high | Yes        |
| 181 | 381199        | 2147713 | Tmem151a      | Human   | 256472        | 28497   | TMEM151A     | 14          | 14.29          | high | Yes        |
| 182 | 209011        | 2385849 | Sirt7         | Human   | 51547         | 14935   | SIRT7        | 14          | 14.21          | high | Yes        |
| 183 | 107999        | 1306825 | Gtpbp6        | Human   | 8225          | 30189   | GTPBP6       | 13          | 13.33          | high | Yes        |
| 184 | 227700        | 2385131 | Sh3glb2       | Human   | 56904         | 10834   | SH3GLB2      | 13          | 13.19          | high | Yes        |
| 185 | 207777        | 2450877 | Tspoap1       | Human   | 9256          | 16831   | TSPOAP1      | 15          | 15.3           | high | Yes        |

| S/N | Mouse Gene ID | MGI ID  | Mouse Symbol | Species | Human Gene ID | HGNC ID | Human Symbol | DIOPT Score | Weighted Score | Rank | Best Score |
|-----|---------------|---------|--------------|---------|---------------|---------|--------------|-------------|----------------|------|------------|
| 186 | 214917        | 2384888 | Fam173a      | Human   | 65990         | 14152   | FAM173A      | 15          | 15.3           | high | Yes        |
| 187 | 78784         | 1926034 | Celf3        | Human   | 11189         | 11967   | CELF3        | 14          | 14.29          | high | Yes        |
| 188 | 15388         | 104816  | Hnrnpl       | Human   | 3191          | 5045    | HNRNPL       | 14          | 14.29          | high | Yes        |
| 189 | 224019        | 107238  | Tmem191c     | Human   | 645426        | 33601   | TMEM191C     | 6           | 6.11           | high | Yes        |
| 190 | 83965         | 1933830 | Enpp5        | Human   | 59084         | 13717   | ENPP5        | 13          | 13.33          | high | Yes        |
| 191 | 104444        | 1888981 | Rexo2        | Human   | 25996         | 17851   | REXO2        | 15          | 15.24          | high | Yes        |
| 192 | 14828         | 95835   | Hspa5        | Human   | 3309          | 5238    | HSPA5        | 16          | 16.25          | high | Yes        |
| 193 | 20266         | 98247   | Scn1b        | Human   | 6324          | 10586   | SCN1B        | 15          | 15.24          | high | Yes        |
| 194 | 15461         | 96224   | Hras         | Human   | 3265          | 5173    | HRAS         | 14          | 14.45          | high | Yes        |
| 195 | 80904         | 2135752 | Dtx3         | Human   | 196403        | 24457   | DTX3         | 15          | 15.3           | high | Yes        |
| 196 | 11836         | 88065   | Araf         | Human   | 369           | 646     | ARAF         | 15          | 15.3           | high | Yes        |
| 197 | 67789         | 1915039 | Dalrd3       | Human   | 55152         | 25536   | DALRD3       | 15          | 15.24          | high | Yes        |
| 198 | 107831        | 1933736 | Adgrb1       | Human   | 575           | 943     | ADGRB1       | 15          | 15.3           | high | Yes        |
| 199 | 268482        | 96687   | Krt12        | Human   | 3859          | 6414    | KRT12        | 15          | 15.3           | high | Yes        |
| 200 | 67881         | 1915131 | Mdp1         | Human   | 145553        | 28781   | MDP1         | 14          | 14.29          | high | Yes        |
| 201 | 68165         | 1915415 | Fdx1l        | Human   | 112812        | 30546   | FDX1L        | 15          | 15.3           | high | Yes        |
| 202 | 225341        | 2385067 | Lims2        | Human   | 55679         | 16084   | LIMS2        | 16          | 16.25          | high | Yes        |
| 203 | 68475         | 1915725 | Ssna1        | Human   | 8636          | 11321   | SSNA1        | 14          | 14.29          | high | Yes        |
| 204 | 14814         | 95823   | Grin2d       | Human   | 2906          | 4588    | GRIN2D       | 15          | 15.24          | high | Yes        |
| 205 | 68379         | 1920234 | Ciz1         | Human   | 25792         | 16744   | CIZ1         | 15          | 15.24          | high | Yes        |
| 206 | 76485         | 1923735 | Glt8d1       | Human   | 55830         | 24870   | GLT8D1       | 15          | 15.3           | high | Yes        |
| 207 | 192169        | 1913679 | Ufsp2        | Human   | 55325         | 25640   | UFSP2        | 12          | 12.1           | high | Yes        |
| 208 | 68347         | 1915597 | Mettl26      | Human   | 84326         | 14141   | METTL26      | 13          | 13.39          | high | Yes        |
| 209 | 109331        | 1925927 | Rnf20        | Human   | 56254         | 10062   | RNF20        | 14          | 14.29          | high | Yes        |
| 210 | 268933        | 2446285 | Wdr24        | Human   | 84219         | 20852   | WDR24        | 13          | 13.29          | high | Yes        |
| 211 | 20535         | 109351  | Slc4a2       | Human   | 6522          | 11028   | SLC4A2       | 16          | 16.25          | high | Yes        |
| 212 | 108077        | 1099835 | Skiv2l       | Human   | 6499          | 10898   | SKIV2L       | 14          | 14.27          | high | Yes        |
| 213 | 224650        | 2446180 | Anks1        | Human   | 23294         | 20961   | ANKS1A       | 14          | 14.29          | high | Yes        |
| 214 | 84585         | 2148796 | Rnf123       | Human   | 63891         | 21148   | RNF123       | 15          | 15.24          | high | Yes        |
| 215 | 18438         | 1338859 | P2rx4        | Human   | 5025          | 8535    | P2RX4        | 16          | 16.25          | high | Yes        |
| 216 | 243914        | 2180197 | Lgi4         | Human   | 163175        | 18712   | LGI4         | 15          | 15.3           | high | Yes        |

| S/N | Mouse Gene ID | MGI ID  | Mouse Symbol | Species | Human Gene ID | HGNC ID | Human Symbol | DIOPT Score | Weighted Score | Rank | Best Score |
|-----|---------------|---------|--------------|---------|---------------|---------|--------------|-------------|----------------|------|------------|
| 217 | 20401         | 104603  | Sh3bp1       | Human   | 23616         | 10824   | SH3BP1       | 12          | 12.35          | high | Yes        |
| 218 | 27403         | 1351646 | Abca7        | Human   | 10347         | 37      | ABCA7        | 15          | 15.3           | high | Yes        |
| 219 | 59032         | 1930009 | Ppp2r3c      | Human   | 55012         | 17485   | PPP2R3C      | 13          | 13.16          | high | Yes        |
| 220 | 140571        | 2154240 | Plxnb3       | Human   | 5365          | 9105    | PLXNB3       | 13          | 13.39          | high | Yes        |
| 221 | 16450         | 1098270 | Jag2         | Human   | 3714          | 6189    | JAG2         | 14          | 14.29          | high | Yes        |
| 222 | 75410         | 109565  | Kmt2b        | Human   | 9757          | 15840   | KMT2B        | 16          | 16.25          | high | Yes        |
| 223 | 15208         | 104876  | Hes5         | Human   | 388585        | 19764   | HES5         | 15          | 15.24          | high | Yes        |
| 224 | 74126         | 1921376 | Syvn1        | Human   | 84447         | 20738   | SYVN1        | 12          | 12.18          | high | Yes        |
| 225 | 11845         | 99435   | Arf6         | Human   | 382           | 659     | ARF6         | 16          | 16.25          | high | Yes        |
| 226 | 234839        | 3603204 | Piezo1       | Human   | 9780          | 28993   | PIEZO1       | 12          | 12.46          | high | Yes        |
| 227 | 17534         | 107818  | Mrc2         | Human   | 9902          | 16875   | MRC2         | 13          | 13.39          | high | Yes        |
| 228 | 106512        | 2146785 | Gpsm3        | Human   | 63940         | 13945   | GPSM3        | 14          | 14.29          | high | Yes        |
| 229 | 50498         | 1354171 | Ebi3         | Human   | 10148         | 3129    | EBI3         | 15          | 15.24          | high | Yes        |
| 230 | 13846         | 104757  | Ephb4        | Human   | 2050          | 3395    | EPHB4        | 15          | 15.3           | high | Yes        |
| 231 | 226250        | 2147658 | Afap1l2      | Human   | 84632         | 25901   | AFAP1L2      | 14          | 14.21          | high | Yes        |

**Table S3: Differential retained introns between 2 weeks & 10 weeks mouse frontal cortex (Lister et al, 2013)**

| S/N | Chr | Start     | End       | Gene          | Ensembl ID          | IR ratio 2W | IR ratio 10W | p-value     |
|-----|-----|-----------|-----------|---------------|---------------------|-------------|--------------|-------------|
| 1   | 1   | 135405972 | 135406516 | Ipo9          | ENSMUSG000000041879 | 0.103676    | 0.0455369    | 0.0138955   |
| 2   | 1   | 36701901  | 36702058  | Actr1b        | ENSMUSG000000037351 | 0.109256    | 0.0599466    | 0.0018512   |
| 3   | 1   | 74563623  | 74564376  | Plcd4         | ENSMUSG000000026173 | 0.140487    | 0.0101506    | 0.028191    |
| 4   | 1   | 74565367  | 74565746  | Plcd4         | ENSMUSG000000026173 | 0.190556    | 0.0440167    | 0.0444591   |
| 5   | 1   | 75170459  | 75170538  | Zfand2b       | ENSMUSG000000026197 | 0.138799    | 0.0284613    | 0.00582513  |
| 6   | 1   | 75198865  | 75199063  | Ankzf1        | ENSMUSG000000026199 | 0.324683    | 0.147112     | 0.0360421   |
| 7   | 1   | 75384745  | 75384827  | Speg          | ENSMUSG000000026207 | 0.14324     | 0.494066     | 0.000209856 |
| 8   | 1   | 75441827  | 75441984  | Gmppa         | ENSMUSG000000033021 | 0.0867148   | 0.195162     | 0.0218421   |
| 9   | 10  | 127185172 | 127185286 | Arhgef25      | ENSMUSG000000019467 | 0.138129    | 0.0645002    | 0.00741354  |
| 10  | 10  | 128124262 | 128124334 | Baz2a         | ENSMUSG000000040054 | 0.151713    | 0.0150502    | 0.0328574   |
| 11  | 10  | 128315657 | 128315775 | Pan2          | ENSMUSG000000005682 | 0.0251781   | 0.218274     | 0.0272492   |
| 12  | 10  | 80004850  | 80004953  | Abca7         | ENSMUSG000000035722 | 0.170213    | 0.016147     | 0.0492963   |
| 13  | 10  | 80393018  | 80393094  | Mbd3          | ENSMUSG000000035478 | 0.181425    | 0.0952059    | 0.000973992 |
| 14  | 10  | 80703756  | 80703852  | Izumo4        | ENSMUSG000000055862 | 0.266731    | 0.130612     | 0.0217406   |
| 15  | 10  | 81262156  | 81262447  | Matk          | ENSMUSG000000004933 | 0.100135    | 0.0555539    | 0.0220574   |
| 16  | 10  | 81580667  | 81580894  | Tle2          | ENSMUSG000000034771 | 0.214447    | 0.0410822    | 0.0389531   |
| 17  | 11  | 100348859 | 100349236 | Hap1          | ENSMUSG000000006930 | 0.600634    | 0.776508     | 0.0348457   |
| 18  | 11  | 101183582 | 101183851 | Cntnap1       | ENSMUSG000000017167 | 0.11418     | 0.0316603    | 0.000187818 |
| 19  | 11  | 115255426 | 115255685 | Grin2c        | ENSMUSG000000020734 | 0.146571    | 0.0320412    | 0.0300785   |
| 20  | 11  | 115788390 | 115788662 | Tmem94        | ENSMUSG000000020747 | 0.170254    | 0.0444956    | 0.0352388   |
| 21  | 11  | 115893329 | 115893494 | Recql5        | ENSMUSG000000020752 | 0.211514    | 0.0231092    | 0.0213726   |
| 22  | 11  | 120008444 | 120009274 | Aatk          | ENSMUSG000000025375 | 0.126907    | 0.241595     | 0.00039582  |
| 23  | 11  | 120612083 | 120612462 | Pcyt2         | ENSMUSG000000025137 | 0.237042    | 0.104075     | 0.000564553 |
| 24  | 11  | 120788596 | 120788669 | Gps1          | ENSMUSG000000025156 | 0.174881    | 0.114598     | 0.00258482  |
| 25  | 11  | 121221161 | 121221235 | Hexdc         | ENSMUSG000000039307 | 0.176117    | 0.0595745    | 0.0274639   |
| 26  | 11  | 121221337 | 121221500 | Hexdc         | ENSMUSG000000039307 | 0.183711    | 0.304175     | 0.0371619   |
| 27  | 11  | 5707409   | 5707486   | Mrps24        | ENSMUSG000000020477 | 0.25406     | 0.162847     | 0.0383016   |
| 28  | 11  | 59209051  | 59209127  | 2310033P09Rik | ENSMUSG000000020441 | 0.135135    | 0.0224981    | 0.0339436   |
| 29  | 11  | 61450902  | 61450977  | Rnf112        | ENSMUSG000000010086 | 0.392641    | 0.318414     | 0.0114913   |
| 30  | 11  | 62318030  | 62319365  | Ncor1         | ENSMUSG000000018501 | 0.0695276   | 0.123352     | 0.0437627   |
| 31  | 11  | 69330226  | 69330396  | Kcnab3        | ENSMUSG000000018470 | 0.13455     | 0.0224996    | 0.00167641  |
| 32  | 11  | 70010770  | 70010848  | Acadvl        | ENSMUSG000000018574 | 0.0294238   | 0.103818     | 0.0274464   |
| 33  | 11  | 75647276  | 75647401  | Inpp5k        | ENSMUSG000000006127 | 0.0521253   | 0.162584     | 0.0307642   |
| 34  | 11  | 78161448  | 78161517  | Traf4         | ENSMUSG000000017386 | 0.0188679   | 0.125        | 0.0412001   |
| 35  | 11  | 78470851  | 78471370  | Slc46a1       | ENSMUSG000000020829 | 0.621037    | 0.315145     | 0.0121228   |
| 36  | 11  | 87589818  | 87589955  | Sep-04        | ENSMUSG000000020486 | 0.136907    | 0.0891177    | 0.0389162   |
| 37  | 11  | 87777235  | 87777766  | Bzrap1        | ENSMUSG000000034156 | 0.389259    | 0.256118     | 0.00817042  |
| 38  | 11  | 98716525  | 98717708  | Med24         | ENSMUSG000000017210 | 0.139687    | 0.0671352    | 0.0280788   |
| 39  | 11  | 99418135  | 99418273  | Krt12         | ENSMUSG000000020912 | 0.686452    | 0.516022     | 0.0437716   |
| 40  | 12  | 109034351 | 109035327 | Begain        | ENSMUSG000000040867 | 0.118713    | 0.0658253    | 0.00989419  |
| 41  | 12  | 112912720 | 112913164 | Jag2          | ENSMUSG000000002799 | 0.122763    | 0.0305179    | 0.037627    |
| 42  | 12  | 31327821  | 31329109  | Lamb1         | ENSMUSG000000002900 | 0.14778     | 0.461928     | 0.0110325   |
| 43  | 12  | 56340297  | 56340384  | Mbip          | ENSMUSG000000021028 | 0.152344    | 0.433694     | 0.00633853  |
| 44  | 12  | 69372223  | 69372323  | Arf6          | ENSMUSG000000044147 | 0.0909091   | 0.310034     | 0.0272719   |
| 45  | 12  | 80169016  | 80170182  | Actn1         | ENSMUSG000000015143 | 0.120554    | 0.0410996    | 0.00320106  |
| 46  | 13  | 19370367  | 19370479  | Stard3nl      | ENSMUSG000000003062 | 0.0693026   | 0.143885     | 0.00773779  |
| 47  | 13  | 21448484  | 21449273  | Zscan26       | ENSMUSG000000022228 | 0.384601    | 0.224713     | 0.0436382   |

| S/N | Chr | Start     | End       | Gene          | Ensembl ID         | IR ratio 2W | IR ratio 10W | p-value     |
|-----|-----|-----------|-----------|---------------|--------------------|-------------|--------------|-------------|
| 48  | 13  | 49203789  | 49203928  | Card19        | ENSMUSG00000037960 | 0.430788    | 0.164756     | 0.0428843   |
| 49  | 13  | 55507123  | 55507329  | Pdlim7        | ENSMUSG00000021493 | 0.387267    | 0.244018     | 0.0129957   |
| 50  | 13  | 55507366  | 55507487  | Pdlim7        | ENSMUSG00000021493 | 0.349804    | 0.228908     | 0.0252138   |
| 51  | 13  | 55531684  | 55531831  | Ddx41         | ENSMUSG00000021494 | 0.10292     | 0.0344828    | 0.0218174   |
| 52  | 13  | 55535804  | 55535885  | Ddx41         | ENSMUSG00000021494 | 0.145781    | 0.0306122    | 0.00527032  |
| 53  | 13  | 92844867  | 92845205  | Mtx3          | ENSMUSG00000021704 | 0.225238    | 0.0482529    | 0.0306794   |
| 54  | 15  | 102500922 | 102501100 | Map3k12       | ENSMUSG00000023050 | 0.174924    | 0.10103      | 0.0191782   |
| 55  | 15  | 74582987  | 74584377  | Adgrb1        | ENSMUSG00000034730 | 0.0652778   | 0.157383     | 1.2739E-07  |
| 56  | 15  | 75925662  | 75925792  | Tsta3         | ENSMUSG00000022570 | 0.17639     | 0.0811304    | 0.0319573   |
| 57  | 15  | 76537006  | 76537089  | Fbxl6         | ENSMUSG00000022559 | 0.147727    | 0.0416667    | 0.018448    |
| 58  | 15  | 76537197  | 76537288  | Fbxl6         | ENSMUSG00000022559 | 0.0377179   | 0.117007     | 0.0385786   |
| 59  | 15  | 76593859  | 76593937  | Adck5         | ENSMUSG00000022550 | 0.626667    | 0.26087      | 0.0358645   |
| 60  | 15  | 89373602  | 89373682  | Sco2          | ENSMUSG00000091780 | 0.112768    | 0.03125      | 0.0397963   |
| 61  | 15  | 89584007  | 89584278  | Rabl2         | ENSMUSG00000022621 | 0.395215    | 0.215098     | 0.0132688   |
| 62  | 15  | 98595042  | 98595126  | Adcy6         | ENSMUSG00000022994 | 0.146552    | 0.0433213    | 0.0310691   |
| 63  | 16  | 17276887  | 17276961  | Tmem191c      | ENSMUSG00000055692 | 0.224604    | 0.147541     | 0.0134029   |
| 64  | 16  | 20709315  | 20709569  | Clcn2         | ENSMUSG00000022843 | 0.173834    | 0.0382553    | 0.000669554 |
| 65  | 16  | 20734401  | 20734486  | Chrd          | ENSMUSG00000006958 | 0.209534    | 0.0540541    | 0.0433971   |
| 66  | 16  | 20734586  | 20734685  | Chrd          | ENSMUSG00000006958 | 0.0239264   | 0.138603     | 0.0304049   |
| 67  | 16  | 20736143  | 20736263  | Chrd          | ENSMUSG00000006958 | 0.190869    | 0.0694334    | 0.0471994   |
| 68  | 16  | 32616898  | 32617096  | Tfrc          | ENSMUSG00000022797 | 0.12        | 0.0465277    | 0.0185625   |
| 69  | 16  | 5011692   | 5012240   | Rogdi         | ENSMUSG00000022540 | 0.142681    | 0.0724463    | 0.00361119  |
| 70  | 16  | 5198623   | 5198730   | Nagpa         | ENSMUSG00000023143 | 0.144737    | 0.00939542   | 0.0341145   |
| 71  | 17  | 15521793  | 15521915  | Pdcd2         | ENSMUSG00000014771 | 0.182658    | 0.0285714    | 0.00495297  |
| 72  | 17  | 24529970  | 24530054  | Rab26         | ENSMUSG00000079657 | 0.111804    | 0.0381813    | 0.00814461  |
| 73  | 17  | 24890460  | 24890567  | Spsb3         | ENSMUSG00000024160 | 0.190426    | 0.0977918    | 0.00711228  |
| 74  | 17  | 24890935  | 24891010  | Spsb3         | ENSMUSG00000024160 | 0.149454    | 0.0841864    | 0.018174    |
| 75  | 17  | 25235111  | 25235181  | Gnptg         | ENSMUSG00000035521 | 0.166635    | 0.105758     | 0.0360887   |
| 76  | 17  | 25827532  | 25827652  | Wdr24         | ENSMUSG00000025737 | 0.172083    | 0.0625512    | 0.026275    |
| 77  | 17  | 25835893  | 25835968  | Rhbdl1        | ENSMUSG00000025735 | 0.0900859   | 0.194456     | 0.000745908 |
| 78  | 17  | 25840751  | 25840835  | Rhot2         | ENSMUSG00000025733 | 0.138024    | 0.054657     | 0.00158414  |
| 79  | 17  | 25868543  | 25868624  | Fam195a       | ENSMUSG00000025732 | 0.488665    | 0.0975104    | 0.0185286   |
| 80  | 17  | 25876562  | 25876660  | Mettl26       | ENSMUSG00000025731 | 0.280374    | 0.164381     | 0.0310218   |
| 81  | 17  | 26203512  | 26203577  | Rgs11         | ENSMUSG00000024186 | 0.677785    | 0.361111     | 0.0416643   |
| 82  | 17  | 26934535  | 26934630  | Phf1          | ENSMUSG00000024193 | 0.143955    | 0.043863     | 0.0289048   |
| 83  | 17  | 32316667  | 32317066  | Akap8         | ENSMUSG00000024045 | 0.236354    | 0.655198     | 0.010978    |
| 84  | 17  | 37011517  | 37012062  | Mog           | ENSMUSG00000076439 | 0.133681    | 0.0160183    | 0.00342837  |
| 85  | 17  | 44082920  | 44085204  | Enpp5         | ENSMUSG00000023960 | 0.638339    | 0.421266     | 7.93525E-05 |
| 86  | 17  | 56768628  | 56768805  | Dus3l         | ENSMUSG00000007603 | 0.528766    | 0.400237     | 0.043818    |
| 87  | 17  | 80204387  | 80205261  | Srsf7         | ENSMUSG00000024097 | 0.229582    | 0.14186      | 0.0225319   |
| 88  | 18  | 32429303  | 32429699  | Bin1          | ENSMUSG00000024381 | 0.101317    | 0.146861     | 0.0440452   |
| 89  | 18  | 34651462  | 34651546  | Cdc23         | ENSMUSG00000024370 | 0.167508    | 0.0515222    | 0.0339197   |
| 90  | 18  | 36787627  | 36787898  | Hars2         | ENSMUSG00000019143 | 0.401368    | 0.177975     | 0.0383683   |
| 91  | 18  | 37958389  | 37958511  | Rell2         | ENSMUSG00000044024 | 0.114653    | 0.0561689    | 0.00316136  |
| 92  | 18  | 37958571  | 37958758  | Rell2         | ENSMUSG00000044024 | 0.116543    | 0.0754282    | 0.030889    |
| 93  | 18  | 38258186  | 38258269  | O610009O20Rik | ENSMUSG00000024442 | 0.127989    | 0.00403101   | 0.00911186  |
| 94  | 18  | 61738756  | 61739123  | Afap1l1       | ENSMUSG00000033032 | 0.114856    | 0.0089173    | 0.0139939   |
| 95  | 18  | 74219238  | 74219382  | Cxxc1         | ENSMUSG00000024560 | 0.1         | 0.213039     | 0.0196597   |

| S/N | Chr | Start     | End       | Gene     | Ensembl ID         | IR ratio 2W | IR ratio 10W | p-value     |
|-----|-----|-----------|-----------|----------|--------------------|-------------|--------------|-------------|
| 96  | 19  | 29584213  | 29584466  | Ric1     | ENSMUSG00000038658 | 0.136364    | 0.0149181    | 0.0480064   |
| 97  | 19  | 36970038  | 36972897  | Btaf1    | ENSMUSG00000040565 | 0.00298221  | 0.447136     | 0.000171702 |
| 98  | 19  | 43665828  | 43666914  | Slc25a28 | ENSMUSG00000040414 | 0.459284    | 0.247403     | 0.00985645  |
| 99  | 19  | 5051254   | 5051353   | Rin1     | ENSMUSG00000024883 | 0.230769    | 0.00924176   | 0.0021926   |
| 100 | 19  | 5495982   | 5496057   | Snx32    | ENSMUSG00000056185 | 0.10255     | 0.0342904    | 0.00418044  |
| 101 | 19  | 5498301   | 5498395   | Snx32    | ENSMUSG00000056185 | 0.17134     | 0.106953     | 0.0476063   |
| 102 | 19  | 8743135   | 8743352   | Stx5a    | ENSMUSG00000010110 | 0.102144    | 0.0420223    | 0.0264319   |
| 103 | 19  | 8871756   | 8871858   | Ubxn1    | ENSMUSG00000071655 | 0.149864    | 0.0883154    | 0.0359977   |
| 104 | 2   | 112640286 | 112640612 | Ryr3     | ENSMUSG00000057378 | 0.0322581   | 0.290203     | 0.0292136   |
| 105 | 2   | 119752156 | 119752230 | Ltk      | ENSMUSG00000027297 | 0.514472    | 0.236816     | 0.00683572  |
| 106 | 2   | 121196242 | 121196734 | Tubgcp4  | ENSMUSG00000027263 | 0.507753    | 0.244023     | 0.020808    |
| 107 | 2   | 164834208 | 164834319 | Ctsa     | ENSMUSG00000017760 | 0.0430152   | 0.108713     | 0.00784084  |
| 108 | 2   | 164893615 | 164893700 | Zfp335   | ENSMUSG00000039834 | 0.241489    | 0.395754     | 0.031448    |
| 109 | 2   | 181339094 | 181339162 | Rtel1    | ENSMUSG00000038685 | 0.346939    | 0.0333333    | 0.0254804   |
| 110 | 2   | 181382544 | 181382615 | Lime1    | ENSMUSG00000090077 | 0.16574     | 0.0487805    | 0.0126838   |
| 111 | 2   | 20808024  | 20808709  | Etl4     | ENSMUSG00000036617 | 0.126541    | 0.279269     | 0.00308322  |
| 112 | 2   | 25353516  | 25353607  | Dpp7     | ENSMUSG00000026958 | 0.365836    | 0.197706     | 0.042136    |
| 113 | 2   | 25354822  | 25354892  | Dpp7     | ENSMUSG00000026958 | 0.341865    | 0.0294957    | 0.0272401   |
| 114 | 2   | 25909306  | 25909593  | Kcnt1    | ENSMUSG00000058740 | 0.192787    | 0.0980598    | 0.0200227   |
| 115 | 2   | 26591728  | 26592117  | Egfl7    | ENSMUSG00000026921 | 0.192698    | 0.0985656    | 0.0267453   |
| 116 | 2   | 30347104  | 30348554  | Sh3glb2  | ENSMUSG00000026860 | 0.144545    | 0.101399     | 0.0173885   |
| 117 | 2   | 30348617  | 30349225  | Sh3glb2  | ENSMUSG00000026860 | 0.150472    | 0.0912719    | 0.00542029  |
| 118 | 2   | 32377362  | 32377508  | Ciz1     | ENSMUSG00000039205 | 0.145863    | 0.312266     | 0.00604352  |
| 119 | 2   | 32377630  | 32377963  | Ciz1     | ENSMUSG00000039205 | 0.131824    | 0.374056     | 8.73801E-05 |
| 120 | 2   | 5866241   | 5866353   | Nudt5    | ENSMUSG00000025817 | 0.139       | 0.0111089    | 0.0181256   |
| 121 | 2   | 69654112  | 69654245  | Bbs5     | ENSMUSG00000063145 | 0.179678    | 0.0390625    | 0.0350721   |
| 122 | 2   | 69654373  | 69655498  | Bbs5     | ENSMUSG00000063145 | 0.207745    | 0.0575585    | 0.016264    |
| 123 | 3   | 10346026  | 10346109  | Zfand1   | ENSMUSG00000039795 | 0.112296    | 0.0204717    | 0.0161365   |
| 124 | 3   | 108075359 | 108075530 | Ampd2    | ENSMUSG00000027889 | 0.137764    | 0.0541077    | 0.0205616   |
| 125 | 3   | 108079326 | 108079586 | Ampd2    | ENSMUSG00000027889 | 0.274611    | 0.123459     | 0.0196358   |
| 126 | 3   | 116128808 | 116129303 | Vcam1    | ENSMUSG00000027962 | 0.11468     | 0.00443232   | 0.0116561   |
| 127 | 3   | 35837589  | 35839048  | Atp11b   | ENSMUSG00000037400 | 0.701022    | 0.418338     | 0.0101762   |
| 128 | 3   | 80688714  | 80689102  | Gria2    | ENSMUSG00000033981 | 0.254224    | 0.188426     | 0.00244411  |
| 129 | 3   | 89210183  | 89210265  | Mtx1     | ENSMUSG00000064068 | 0.172066    | 0.303328     | 0.01356     |
| 130 | 3   | 89343583  | 89343672  | Adam15   | ENSMUSG00000028041 | 0.309963    | 0.187342     | 0.0279879   |
| 131 | 3   | 94955385  | 94955745  | Rfx5     | ENSMUSG00000005774 | 0.304369    | 0.0891365    | 0.033203    |
| 132 | 3   | 96707300  | 96707557  | Nudt17   | ENSMUSG00000028100 | 0.219243    | 0.0451915    | 0.0431203   |
| 133 | 4   | 109062332 | 109062464 | Osbpl9   | ENSMUSG00000028559 | 0.36932     | 0.241812     | 0.0176989   |
| 134 | 4   | 117130817 | 117131061 | Plk3     | ENSMUSG00000028680 | 0.0444444   | 0.180042     | 0.0498074   |
| 135 | 4   | 141465640 | 141465721 | Zbtb17   | ENSMUSG00000006215 | 0.160434    | 0.0380835    | 0.0207579   |
| 136 | 4   | 154961049 | 154961135 | Hes5     | ENSMUSG00000048001 | 0.119928    | 0.298246     | 0.0129777   |
| 137 | 4   | 155854659 | 155854730 | Dvl1     | ENSMUSG00000029071 | 0.256009    | 0.148439     | 0.00572899  |
| 138 | 4   | 155855025 | 155855103 | Dvl1     | ENSMUSG00000029071 | 0.10324     | 0.039604     | 0.00777573  |
| 139 | 4   | 43569285  | 43569488  | Gba2     | ENSMUSG00000028467 | 0.109859    | 0.0499484    | 0.0276359   |
| 140 | 5   | 108653219 | 108653635 | Dgkq     | ENSMUSG00000004815 | 0.208755    | 0.0816799    | 0.0454035   |
| 141 | 5   | 110104168 | 110104267 | Gtpbp6   | ENSMUSG00000033434 | 0.0832274   | 0.332787     | 1.35676E-05 |
| 142 | 5   | 110104658 | 110104889 | Gtpbp6   | ENSMUSG00000033434 | 0.0960578   | 0.189857     | 0.00372204  |
| 143 | 5   | 110105098 | 110105198 | Gtpbp6   | ENSMUSG00000033434 | 0.101284    | 0.272589     | 0.000104511 |

| S/N | Chr | Start     | End       | Gene     | Ensembl ID         | IR ratio 2W | IR ratio 10W | p-value    |
|-----|-----|-----------|-----------|----------|--------------------|-------------|--------------|------------|
| 144 | 5   | 118056438 | 118056536 | Tesc     | ENSMUSG00000029359 | 0.349206    | 0.22902      | 0.0128326  |
| 145 | 5   | 124000774 | 124000991 | Hip1r    | ENSMUSG00000000915 | 0.120585    | 0.0331328    | 0.00685577 |
| 146 | 5   | 137520800 | 137520884 | Gigyf1   | ENSMUSG00000029714 | 0.413203    | 0.0666667    | 0.0282369  |
| 147 | 5   | 24441261  | 24441335  | Fastk    | ENSMUSG00000028959 | 0.121038    | 0.0492099    | 0.0157037  |
| 148 | 5   | 24593118  | 24593224  | Smarcd3  | ENSMUSG00000028949 | 0.0715394   | 0.116272     | 0.0272798  |
| 149 | 5   | 30930636  | 30930715  | Khk      | ENSMUSG00000029162 | 0.25        | 0.0479798    | 0.0295263  |
| 150 | 5   | 74597410  | 74597775  | Lnx1     | ENSMUSG00000029228 | 0.359438    | 0.517787     | 0.0152329  |
| 151 | 6   | 106779041 | 106779185 | Trnt1    | ENSMUSG00000013736 | 0.290684    | 0.469536     | 0.00534542 |
| 152 | 6   | 113194303 | 113195214 | Lhfpl4   | ENSMUSG00000042873 | 0.0431655   | 0.16206      | 0.0251824  |
| 153 | 6   | 124702322 | 124702411 | Lpcat3   | ENSMUSG00000004270 | 0.00041485  | 0.110512     | 0.00587187 |
| 154 | 6   | 30742220  | 30742527  | Mest     | ENSMUSG00000051855 | 0.0417715   | 0.115133     | 0.0282217  |
| 155 | 6   | 30742605  | 30742715  | Mest     | ENSMUSG00000051855 | 0.0437436   | 0.149425     | 0.00798307 |
| 156 | 6   | 30742852  | 30743013  | Mest     | ENSMUSG00000051855 | 0.0149825   | 0.118349     | 0.00191984 |
| 157 | 6   | 30744932  | 30745081  | Mest     | ENSMUSG00000051855 | 0.056582    | 0.151064     | 0.0096256  |
| 158 | 6   | 30746325  | 30747051  | Mest     | ENSMUSG00000051855 | 0.0725477   | 0.22368      | 0.0060604  |
| 159 | 6   | 30748987  | 30749405  | Copg2    | ENSMUSG00000025607 | 0.192642    | 0.0832169    | 0.00215607 |
| 160 | 6   | 30749899  | 30750537  | Copg2    | ENSMUSG00000025607 | 0.299038    | 0.145063     | 0.0027501  |
| 161 | 6   | 85512943  | 85513264  | Egr4     | ENSMUSG00000071341 | 0.0353649   | 0.117543     | 0.0371271  |
| 162 | 7   | 105740867 | 105740959 | Ilk      | ENSMUSG00000030890 | 0.0608129   | 0.119696     | 0.0136622  |
| 163 | 7   | 126444429 | 126444522 | Rabep2   | ENSMUSG00000030727 | 0.111675    | 0.0119048    | 0.0413648  |
| 164 | 7   | 141064555 | 141064640 | B4galnt4 | ENSMUSG00000055629 | 0.138224    | 0.0666295    | 0.0456837  |
| 165 | 7   | 141491673 | 141491773 | Tspan4   | ENSMUSG00000025511 | 0.018641    | 0.103339     | 0.0155036  |
| 166 | 7   | 27325803  | 27326486  | Ltbp4    | ENSMUSG00000040488 | 0.10277     | 0.0127281    | 0.0344198  |
| 167 | 7   | 34118999  | 34119138  | Wtip     | ENSMUSG00000036459 | 0.415011    | 0.0952381    | 0.0263377  |
| 168 | 7   | 44842720  | 44842815  | Tbc1d17  | ENSMUSG00000038520 | 0.106628    | 0.0109389    | 0.00578796 |
| 169 | 7   | 45634854  | 45634966  | Rasip1   | ENSMUSG00000044562 | 0.34715     | 0.692205     | 0.0368241  |
| 170 | 7   | 45636581  | 45636719  | Rasip1   | ENSMUSG00000044562 | 0.472081    | 0.783269     | 0.0111116  |
| 171 | 7   | 45834481  | 45834638  | Grin2d   | ENSMUSG00000002771 | 0.425973    | 0.795902     | 0.0020361  |
| 172 | 7   | 80891909  | 80892975  | Wdr73    | ENSMUSG00000025722 | 0.319578    | 0.182444     | 0.0387605  |
| 173 | 7   | 90444377  | 90445424  | Crebzf   | ENSMUSG00000051451 | 0.229963    | 0.387672     | 0.0293143  |
| 174 | 8   | 105356751 | 105356970 | Slc9a5   | ENSMUSG00000014786 | 0.482721    | 0.233753     | 0.0144635  |
| 175 | 8   | 105697945 | 105698030 | Carmil2  | ENSMUSG00000050357 | 0.159249    | 0.0779487    | 0.0251364  |
| 176 | 8   | 105704021 | 105704112 | Enkd1    | ENSMUSG00000013155 | 0.00211193  | 0.16         | 0.0125587  |
| 177 | 8   | 105704249 | 105704350 | Enkd1    | ENSMUSG00000013155 | 0.0130781   | 0.25         | 0.0046312  |
| 178 | 8   | 105937381 | 105937493 | Psmb10   | ENSMUSG00000031897 | 0.140173    | 0.0648956    | 0.0199868  |
| 179 | 8   | 122482526 | 122482648 | Piezo1   | ENSMUSG00000014444 | 0.0198366   | 0.1693       | 0.0474209  |
| 180 | 8   | 123227017 | 123227422 | Cdk10    | ENSMUSG00000033862 | 0.176755    | 0.0725742    | 0.00618131 |
| 181 | 8   | 123230327 | 123230593 | Cdk10    | ENSMUSG00000033862 | 0.185179    | 0.0969331    | 0.0227315  |
| 182 | 8   | 25735111  | 25735744  | Ddhd2    | ENSMUSG00000061313 | 0.14301     | 0.0591961    | 0.0445232  |
| 183 | 8   | 25741354  | 25741600  | Ddhd2    | ENSMUSG00000061313 | 0.110768    | 0.0259512    | 0.0473574  |
| 184 | 8   | 70186776  | 70188299  | Slc25a42 | ENSMUSG00000002346 | 0.171454    | 0.0428758    | 0.0308023  |
| 185 | 8   | 70188949  | 70189410  | Slc25a42 | ENSMUSG00000002346 | 0.268024    | 0.121274     | 0.0449073  |
| 186 | 8   | 70598617  | 70598701  | Ssbp4    | ENSMUSG00000070003 | 0.43918     | 0.288993     | 0.00036309 |
| 187 | 8   | 83725346  | 83725864  | Adgre5   | ENSMUSG00000002885 | 0.0102123   | 0.117177     | 0.0396201  |
| 188 | 8   | 84098040  | 84098198  | Dcaf15   | ENSMUSG00000037103 | 0.105977    | 0.0212766    | 0.0475055  |
| 189 | 8   | 84134987  | 84135061  | Cc2d1a   | ENSMUSG00000036686 | 0.00952381  | 0.108407     | 0.00167772 |
| 190 | 8   | 84835674  | 84835754  | Rad23a   | ENSMUSG00000003813 | 0.109234    | 0.19978      | 0.0352085  |
| 191 | 8   | 85064496  | 85064580  | Fbxw9    | ENSMUSG00000008167 | 0.20373     | 0.490196     | 0.00644022 |

| S/N | Chr | Start     | End       | Gene   | Ensembl ID         | IR ratio 2W | IR ratio 10W | p-value     |
|-----|-----|-----------|-----------|--------|--------------------|-------------|--------------|-------------|
| 192 | 8   | 85066169  | 85066272  | Fbxw9  | ENSMUSG00000008167 | 0.0364794   | 0.133333     | 0.0151772   |
| 193 | 8   | 85079837  | 85080119  | Wdr83  | ENSMUSG00000005150 | 0.55836     | 0.35979      | 0.0251254   |
| 194 | 8   | 85492689  | 85492904  | Gpt2   | ENSMUSG00000031700 | 0.0808982   | 0.250323     | 0.0268353   |
| 195 | 8   | 91106983  | 91107057  | Rbl2   | ENSMUSG00000031666 | 0.131403    | 0.0397727    | 0.0457597   |
| 196 | 9   | 106435014 | 106435095 | Acy1   | ENSMUSG00000023262 | 0.25        | 0.0155297    | 0.0142472   |
| 197 | 9   | 107590422 | 107590504 | lfrd2  | ENSMUSG00000010048 | 0.586614    | 0.10683      | 0.00655897  |
| 198 | 9   | 108299890 | 108300533 | Amt    | ENSMUSG00000032607 | 0.0307377   | 0.171361     | 0.0356239   |
| 199 | 9   | 21073318  | 21073388  | Fdx1l  | ENSMUSG00000079677 | 0.52381     | 0.309353     | 0.00833777  |
| 200 | 9   | 21590028  | 21590110  | Yipf2  | ENSMUSG00000032182 | 0.242991    | 0.0611961    | 0.0137388   |
| 201 | 9   | 44298411  | 44298872  | Hinfp  | ENSMUSG00000032119 | 0.181818    | 0.0176355    | 0.0446779   |
| 202 | 9   | 45859059  | 45859278  | Bace1  | ENSMUSG00000032086 | 0.164452    | 0.253967     | 0.0244596   |
| 203 | 9   | 59713940  | 59714176  | Gramd2 | ENSMUSG00000074259 | 0.0237581   | 0.372837     | 0.0107422   |
| 204 | 9   | 64307348  | 64307429  | Dis3l  | ENSMUSG00000032396 | 0.0208333   | 0.13151      | 0.0276094   |
| 205 | 9   | 97445713  | 97454582  | Clstn2 | ENSMUSG00000032452 | 0.57461     | 0.409153     | 0.0345341   |
| 206 | X   | 134080437 | 134081190 | Cstf2  | ENSMUSG00000031256 | 0.364152    | 0.240265     | 0.0444715   |
| 207 | X   | 160529015 | 160529914 | Phka2  | ENSMUSG00000031295 | 0.268109    | 0.0721455    | 0.0259692   |
| 208 | X   | 73657343  | 73657437  | Pnck   | ENSMUSG00000002012 | 0.148925    | 0.042708     | 0.000162521 |
| 209 | X   | 73657513  | 73657719  | Pnck   | ENSMUSG00000002012 | 0.126315    | 0.0473795    | 0.00557259  |

**Table S3: Differential retained introns between 10 weeks & 22 months mouse frontal cortex (Lister et al, 2013)**

| S/N | Chr | Start     | End       | Gene          | Ensembl ID         | IR ratio 10w | IR ratio 22m | p-value     |
|-----|-----|-----------|-----------|---------------|--------------------|--------------|--------------|-------------|
| 1   | 1   | 135405972 | 135406516 | lpo9          | ENSMUSG00000041879 | 0.0354338    | 0.102966     | 1.32044E-05 |
| 2   | 1   | 58414684  | 58417012  | Clk1          | ENSMUSG00000026034 | 0.0569629    | 0.122465     | 0.012689    |
| 3   | 1   | 75442031  | 75442184  | Gmppa         | ENSMUSG00000033021 | 0.100045     | 0.218837     | 0.00314071  |
| 4   | 1   | 91076991  | 91078390  | Lrrfip1       | ENSMUSG00000026305 | 0.0498244    | 0.106709     | 0.0462956   |
| 5   | 1   | 91424486  | 91427738  | Per2          | ENSMUSG00000055866 | 0.0242656    | 0.121902     | 0.018144    |
| 6   | 10  | 127191039 | 127191335 | Dtx3          | ENSMUSG00000040415 | 0.189415     | 0.161327     | 0.0486148   |
| 7   | 10  | 127295478 | 127295722 | Ddit3         | ENSMUSG00000025408 | 0.0971555    | 0.174634     | 0.00819299  |
| 8   | 10  | 20261983  | 20266735  | Map7          | ENSMUSG00000019996 | 0.0408969    | 0.10135      | 0.0148992   |
| 9   | 10  | 79621187  | 79622254  | Shc2          | ENSMUSG00000020312 | 0.0942331    | 0.175018     | 0.0385415   |
| 10  | 10  | 80011842  | 80011914  | Abca7         | ENSMUSG00000035722 | 0.144304     | 0.058689     | 0.0368013   |
| 11  | 10  | 80797839  | 80797909  | Plekhj1       | ENSMUSG00000035278 | 0.258642     | 0.358105     | 0.0448766   |
| 12  | 10  | 83611492  | 83612711  | Appl2         | ENSMUSG00000020263 | 0.155212     | 0.230299     | 0.0246411   |
| 13  | 11  | 102777648 | 102778130 | Adam11        | ENSMUSG00000020926 | 0.0749961    | 0.117354     | 0.0387834   |
| 14  | 11  | 105347473 | 105347598 | Mrc2          | ENSMUSG00000020695 | 0.157895     | 0.017321     | 0.0452675   |
| 15  | 11  | 109945858 | 109946244 | Abca8b        | ENSMUSG00000020620 | 0.0320013    | 0.177181     | 0.015338    |
| 16  | 11  | 115788390 | 115788662 | Tmem94        | ENSMUSG00000020747 | 0.0436384    | 0.105741     | 0.0367392   |
| 17  | 11  | 115820223 | 115820378 | Tsen54        | ENSMUSG00000020781 | 0.0070687    | 0.156727     | 0.020483    |
| 18  | 11  | 120620504 | 120620646 | Sirt7         | ENSMUSG00000025138 | 0.471492     | 0.617077     | 0.0470011   |
| 19  | 11  | 121221161 | 121221235 | Hexdc         | ENSMUSG00000039307 | 0.0687797    | 0.231965     | 0.000310447 |
| 20  | 11  | 59209051  | 59209127  | 2310033P09Rik | ENSMUSG00000020441 | 0.0555165    | 0.136802     | 0.0456866   |
| 21  | 11  | 59209200  | 59209307  | 2310033P09Rik | ENSMUSG00000020441 | 0.151263     | 0.263039     | 0.0483324   |
| 22  | 11  | 60708697  | 60708788  | Lgl1          | ENSMUSG00000020536 | 0.060339     | 0.139268     | 0.0187479   |
| 23  | 11  | 69622790  | 69622859  | Sat2          | ENSMUSG00000069835 | 0.0443213    | 0.141008     | 0.0205772   |
| 24  | 11  | 72444977  | 72445175  | Mybbp1a       | ENSMUSG00000040463 | 0.127399     | 0.275061     | 0.0207959   |
| 25  | 11  | 82795786  | 82796027  | Lig3          | ENSMUSG00000020697 | 0.0489522    | 0.14381      | 0.0369191   |
| 26  | 11  | 87777235  | 87777766  | Bzrap1        | ENSMUSG00000034156 | 0.250619     | 0.323847     | 0.011719    |
| 27  | 11  | 94542984  | 94543293  | Rsad1         | ENSMUSG00000039096 | 0.0688726    | 0.170717     | 0.0311955   |

| S/N | Chr | Start     | End       | Gene          | Ensembl ID          | IR ratio 10w | IR ratio 22m | p-value    |
|-----|-----|-----------|-----------|---------------|---------------------|--------------|--------------|------------|
| 28  | 11  | 99418135  | 99418273  | Krt12         | ENSMUSG00000020912  | 0.520969     | 0.40939      | 0.0184528  |
| 29  | 12  | 112912614 | 112912692 | Jag2          | ENSMUSG00000002799  | 0.109579     | 0.0422535    | 0.0320678  |
| 30  | 12  | 31934441  | 31936971  | Hbp1          | ENSMUSG00000002996  | 0.082885     | 0.194994     | 0.028233   |
| 31  | 12  | 55302795  | 55302914  | Ppp2r3c       | ENSMUSG000000021022 | 0.241737     | 0.0971338    | 0.0443258  |
| 32  | 12  | 56337455  | 56337763  | Mbip          | ENSMUSG000000021028 | 0.149168     | 0.3046       | 0.0331206  |
| 33  | 12  | 56337829  | 56340200  | Mbip          | ENSMUSG000000021028 | 0.289227     | 0.483462     | 0.0278681  |
| 34  | 12  | 69372223  | 69372323  | Arf6          | ENSMUSG000000044147 | 0.276087     | 0.0670423    | 0.00111077 |
| 35  | 13  | 119473956 | 119474832 | 4833420G17Rik | ENSMUSG000000062822 | 0.0712543    | 0.15506      | 0.0394664  |
| 36  | 13  | 13995783  | 13996892  | B3galnt2      | ENSMUSG000000039242 | 0.0827267    | 0.230846     | 0.0305328  |
| 37  | 13  | 14009731  | 14010541  | Tbce          | ENSMUSG000000039233 | 0.269088     | 0.418655     | 0.0112468  |
| 38  | 13  | 55507123  | 55507329  | Pdlim7        | ENSMUSG000000021493 | 0.22163      | 0.31427      | 0.0075148  |
| 39  | 13  | 68611277  | 68612829  | 1700001L19Rik | ENSMUSG000000021534 | 0.0670931    | 0.135608     | 0.0221557  |
| 40  | 13  | 92685238  | 92688618  | Serinc5       | ENSMUSG000000021703 | 0.0468479    | 0.107125     | 0.0369929  |
| 41  | 14  | 31010409  | 31010863  | Glt8d1        | ENSMUSG000000021916 | 0.427369     | 0.261126     | 0.0135582  |
| 42  | 14  | 31011030  | 31011120  | Glt8d1        | ENSMUSG000000021916 | 0.2443       | 0.115348     | 0.00480167 |
| 43  | 14  | 31013565  | 31013652  | Gnl3          | ENSMUSG000000042354 | 0.0302645    | 0.131095     | 0.00400137 |
| 44  | 14  | 31014227  | 31014589  | Gnl3          | ENSMUSG000000042354 | 0.0763586    | 0.145106     | 0.042444   |
| 45  | 14  | 55660098  | 55660167  | Mdp1          | ENSMUSG000000002329 | 0.549027     | 0.414195     | 0.00612163 |
| 46  | 14  | 55676836  | 55676927  | Gmpr2         | ENSMUSG000000002326 | 0.0727156    | 0.169867     | 0.011209   |
| 47  | 14  | 55898012  | 55898242  | Sdr39u1       | ENSMUSG000000022223 | 0.216431     | 0.323038     | 0.00142162 |
| 48  | 15  | 102523050 | 102523184 | Tarbp2        | ENSMUSG000000023051 | 0.2482       | 0.391437     | 0.0387076  |
| 49  | 15  | 74582987  | 74584377  | Adgrb1        | ENSMUSG000000034730 | 0.161734     | 0.127258     | 0.00514972 |
| 50  | 15  | 75892753  | 75893104  | Naprt         | ENSMUSG000000022574 | 0.0524496    | 0.234637     | 0.0366442  |
| 51  | 15  | 75928543  | 75928891  | Tsta3         | ENSMUSG000000022570 | 0.0918639    | 0.21193      | 0.0129173  |
| 52  | 15  | 76497829  | 76497951  | Hsf1          | ENSMUSG000000022556 | 0.103399     | 0.182222     | 0.0244921  |
| 53  | 15  | 76537786  | 76537916  | Fbxl6         | ENSMUSG000000022559 | 0.227537     | 0.388483     | 0.00902392 |
| 54  | 15  | 78908058  | 78908352  | Sh3bp1        | ENSMUSG000000022436 | 0.176579     | 0.0725981    | 0.0357607  |
| 55  | 15  | 79055416  | 79055494  | Ankrd54       | ENSMUSG000000033055 | 0.0430237    | 0.127935     | 0.0290813  |
| 56  | 15  | 89186427  | 89186753  | Dennd6b       | ENSMUSG000000015377 | 0.165665     | 0.253103     | 0.0286276  |
| 57  | 15  | 89186819  | 89186955  | Dennd6b       | ENSMUSG000000015377 | 0.0483271    | 0.132576     | 0.0021883  |
| 58  | 15  | 89187050  | 89187147  | Dennd6b       | ENSMUSG000000015377 | 0.524551     | 0.651426     | 0.0421526  |
| 59  | 15  | 89373602  | 89373682  | Sco2          | ENSMUSG000000091780 | 0.0576923    | 0.161211     | 0.00654877 |
| 60  | 15  | 98595042  | 98595126  | Adcy6         | ENSMUSG000000022994 | 0.0517241    | 0.151694     | 0.00916438 |
| 61  | 15  | 98815740  | 98815875  | Prkag1        | ENSMUSG000000067713 | 0.109145     | 0.162716     | 0.0250282  |
| 62  | 15  | 99319017  | 99319130  | Fmnl3         | ENSMUSG000000023008 | 0.0363636    | 0.14         | 0.0360215  |
| 63  | 16  | 17276887  | 17276961  | Tmem191c      | ENSMUSG000000055692 | 0.167027     | 0.211619     | 0.0408693  |
| 64  | 16  | 20207793  | 20208418  | Yeats2        | ENSMUSG000000041215 | 0.0479403    | 0.165932     | 0.0328076  |
| 65  | 16  | 20740056  | 20741189  | Chrd          | ENSMUSG000000006958 | 0.0494878    | 0.140698     | 0.0458235  |
| 66  | 16  | 4765889   | 4765977   | Hmox2         | ENSMUSG000000004070 | 0.152443     | 0.207844     | 0.018294   |
| 67  | 16  | 5248830   | 5248911   | Eef2kmt       | ENSMUSG000000022544 | 0.00452284   | 0.111111     | 0.0447856  |
| 68  | 16  | 91030556  | 91034097  | Paxbp1        | ENSMUSG000000022974 | 0.18189      | 0.366463     | 0.00987089 |
| 69  | 16  | 91034287  | 91034799  | Paxbp1        | ENSMUSG000000022974 | 0.217837     | 0.368217     | 0.0314626  |
| 70  | 17  | 23676273  | 23676518  | Tnfrsf12a     | ENSMUSG000000023905 | 0.0192308    | 0.118639     | 0.0486961  |
| 71  | 17  | 24510075  | 24510248  | Traf7         | ENSMUSG000000052752 | 0.110476     | 0.222716     | 0.00306887 |
| 72  | 17  | 24510698  | 24511314  | Traf7         | ENSMUSG000000052752 | 0.0553983    | 0.104023     | 0.0497962  |
| 73  | 17  | 25791676  | 25792052  | Fam173a       | ENSMUSG000000057411 | 0.245348     | 0.316182     | 0.039434   |
| 74  | 17  | 25827356  | 25827427  | Wdr24         | ENSMUSG000000025737 | 0.25         | 0.143687     | 0.0322953  |
| 75  | 17  | 25835056  | 25835136  | Rhbdl1        | ENSMUSG000000025735 | 0.248463     | 0.329807     | 0.0126218  |

| S/N | Chr | Start     | End       | Gene     | Ensembl ID          | IR ratio 10w | IR ratio 22m | p-value     |
|-----|-----|-----------|-----------|----------|---------------------|--------------|--------------|-------------|
| 76  | 17  | 25835893  | 25835968  | Rhbdl1   | ENSMUSG00000025735  | 0.192263     | 0.137251     | 0.0327887   |
| 77  | 17  | 25860817  | 25860906  | Wdr90    | ENSMUSG00000073434  | 0.235294     | 0.676118     | 0.022845    |
| 78  | 17  | 25868543  | 25868624  | Fam195a  | ENSMUSG00000025732  | 0.108499     | 0.341444     | 0.0123513   |
| 79  | 17  | 25876122  | 25876219  | Mettl26  | ENSMUSG00000025731  | 0.163035     | 0.0963257    | 0.0222997   |
| 80  | 17  | 26204383  | 26204486  | Rgs11    | ENSMUSG00000024186  | 0.0614587    | 0.134103     | 0.046628    |
| 81  | 17  | 26208079  | 26208163  | Rgs11    | ENSMUSG00000024186  | 0.279214     | 0.110012     | 0.00287925  |
| 82  | 17  | 28059391  | 28060561  | Anks1    | ENSMUSG00000024219  | 0.45036      | 0.232729     | 0.00557743  |
| 83  | 17  | 29038624  | 29040774  | Srsf3    | ENSMUSG00000071172  | 0.0656293    | 0.119295     | 0.00619764  |
| 84  | 17  | 29705323  | 29705488  | Ccdc167  | ENSMUSG00000024018  | 0.368547     | 0.496752     | 0.0295369   |
| 85  | 17  | 33818444  | 33818525  | Kank3    | ENSMUSG00000042099  | 0.166231     | 0.325581     | 0.0416096   |
| 86  | 17  | 33822375  | 33822674  | Kank3    | ENSMUSG00000042099  | 0.135685     | 0.32053      | 0.00246406  |
| 87  | 17  | 34026935  | 34027015  | H2-Ke6   | ENSMUSG00000073422  | 0.101977     | 0.179039     | 0.012406    |
| 88  | 17  | 34587214  | 34587373  | Notch4   | ENSMUSG00000015468  | 0.00534045   | 0.153846     | 0.0400386   |
| 89  | 17  | 34590563  | 34590741  | Gpsm3    | ENSMUSG00000034786  | 0.349282     | 0.0312595    | 0.0348664   |
| 90  | 17  | 34838683  | 34838812  | Dxo      | ENSMUSG00000040482  | 0.0769788    | 0.163796     | 0.0334087   |
| 91  | 17  | 34845912  | 34846026  | Skiv2l   | ENSMUSG00000040356  | 0.133183     | 0.0700148    | 0.0247605   |
| 92  | 17  | 35670031  | 35670189  | Gtf2h4   | ENSMUSG00000001524  | 0.0244558    | 0.101167     | 0.00946961  |
| 93  | 17  | 43664265  | 43666899  | Slc25a27 | ENSMUSG00000023912  | 0.107143     | 0.199212     | 0.0493686   |
| 94  | 17  | 44082920  | 44085204  | Enpp5    | ENSMUSG00000023960  | 0.426723     | 0.535236     | 0.000437992 |
| 95  | 17  | 55956339  | 55956621  | Ebi3     | ENSMUSG00000003206  | 0.209222     | 0.0136433    | 0.023195    |
| 96  | 17  | 57236239  | 57236373  | Gpr108   | ENSMUSG00000005823  | 0.0298113    | 0.120956     | 0.00747775  |
| 97  | 17  | 78919843  | 78919976  | Cebpzoz  | ENSMUSG000000062691 | 0.191602     | 0.312288     | 0.00118435  |
| 98  | 17  | 80204387  | 80205261  | Srsf7    | ENSMUSG00000024097  | 0.168262     | 0.268779     | 0.00363155  |
| 99  | 18  | 23651648  | 23653328  | Dtna     | ENSMUSG00000024302  | 0.0428532    | 0.106245     | 0.0119471   |
| 100 | 18  | 31944205  | 31944435  | Lims2    | ENSMUSG00000024395  | 0.749306     | 0.543726     | 0.0257295   |
| 101 | 18  | 34651462  | 34651546  | Cdc23    | ENSMUSG00000024370  | 0.0487555    | 0.142103     | 0.0232603   |
| 102 | 18  | 36676622  | 36676864  | Sra1     | ENSMUSG00000006050  | 0.157735     | 0.244442     | 0.0313041   |
| 103 | 18  | 37958571  | 37958758  | Rel2     | ENSMUSG00000044024  | 0.078823     | 0.149104     | 6.31258E-06 |
| 104 | 18  | 74217489  | 74217760  | Cxxc1    | ENSMUSG00000024560  | 0.102564     | 0.174269     | 0.038635    |
| 105 | 18  | 74218655  | 74218731  | Cxxc1    | ENSMUSG00000024560  | 0.0328559    | 0.104985     | 0.0124431   |
| 106 | 18  | 9986355   | 9986552   | Thoc1    | ENSMUSG00000024287  | 0.318698     | 0.488854     | 0.0358276   |
| 107 | 19  | 41945815  | 41946916  | Mms19    | ENSMUSG00000025159  | 0.061441     | 0.129127     | 0.0267315   |
| 108 | 19  | 4264108   | 4264313   | Ssh3     | ENSMUSG00000034616  | 0.157157     | 0.253889     | 0.0398144   |
| 109 | 19  | 5051254   | 5051353   | Rin1     | ENSMUSG00000024883  | 0.0498202    | 0.13465      | 0.0178944   |
| 110 | 19  | 5083101   | 5085297   | Tmem151a | ENSMUSG000000061451 | 0.106332     | 0.140641     | 0.0356497   |
| 111 | 19  | 5495648   | 5495896   | Snx32    | ENSMUSG00000056185  | 0.106383     | 0.165299     | 0.00359424  |
| 112 | 19  | 56916242  | 56916323  | Afap1l2  | ENSMUSG00000025083  | 0.157895     | 0.00040225   | 0.0153264   |
| 113 | 19  | 6052479   | 6052547   | Syvn1    | ENSMUSG00000024807  | 0.104583     | 0.0361871    | 0.00897098  |
| 114 | 19  | 7230106   | 7230187   | Naa40    | ENSMUSG00000024764  | 0.366812     | 0.570752     | 0.0208097   |
| 115 | 19  | 8743135   | 8743352   | Stx5a    | ENSMUSG00000010110  | 0.0643366    | 0.106791     | 0.0434056   |
| 116 | 19  | 8748711   | 8748806   | Stx5a    | ENSMUSG00000010110  | 0.090065     | 0.151845     | 0.0228501   |
| 117 | 2   | 104608972 | 104609090 | Cstf3    | ENSMUSG00000027176  | 0.121281     | 0.0723459    | 0.0416301   |
| 118 | 2   | 104664163 | 104664296 | Cstf3    | ENSMUSG00000027176  | 0.119078     | 0.222608     | 0.045534    |
| 119 | 2   | 104664357 | 104664716 | Cstf3    | ENSMUSG00000027176  | 0.104446     | 0.226053     | 0.016188    |
| 120 | 2   | 11748489  | 11748936  | Fbxo18   | ENSMUSG00000058594  | 0.0687604    | 0.119351     | 0.0249836   |
| 121 | 2   | 11781519  | 11783640  | Ankrd16  | ENSMUSG00000047909  | 0.282948     | 0.448728     | 0.0443028   |
| 122 | 2   | 120031651 | 120031840 | Jmjd7    | ENSMUSG00000098789  | 0.0526316    | 0.333942     | 0.0320964   |
| 123 | 2   | 121196242 | 121196734 | Tubgcp4  | ENSMUSG00000027263  | 0.310943     | 0.462561     | 0.0406439   |

| S/N | Chr | Start     | End       | Gene          | Ensembl ID         | IR ratio 10w | IR ratio 22m | p-value     |
|-----|-----|-----------|-----------|---------------|--------------------|--------------|--------------|-------------|
| 124 | 2   | 131193687 | 131194114 | Cdc25b        | ENSMUSG00000027330 | 0.249471     | 0.413071     | 0.0465857   |
| 125 | 2   | 155634000 | 155634079 | Myh7b         | ENSMUSG00000074652 | 0.0625       | 0.242537     | 0.0343359   |
| 126 | 2   | 156067337 | 156067454 | Spag4         | ENSMUSG00000038180 | 0.0294785    | 0.285714     | 0.0452661   |
| 127 | 2   | 160761648 | 160761738 | Plcg1         | ENSMUSG00000016933 | 0.169567     | 0.263111     | 0.00618646  |
| 128 | 2   | 160761923 | 160762093 | Plcg1         | ENSMUSG00000016933 | 0.210065     | 0.328608     | 0.00716687  |
| 129 | 2   | 174120667 | 174120947 | Npepl1        | ENSMUSG00000039263 | 0.132071     | 0.282836     | 0.0199203   |
| 130 | 2   | 181339094 | 181339162 | Rtel1         | ENSMUSG00000038685 | 0.0176152    | 0.24838      | 0.0043026   |
| 131 | 2   | 181355552 | 181355650 | Rtel1         | ENSMUSG00000038685 | 0.0540541    | 0.211268     | 0.0295373   |
| 132 | 2   | 181382544 | 181382615 | Lime1         | ENSMUSG00000090077 | 0.0473738    | 0.121362     | 0.00975047  |
| 133 | 2   | 181572486 | 181573073 | Uckl1         | ENSMUSG00000089917 | 0.0487549    | 0.126785     | 0.030002    |
| 134 | 2   | 25250003  | 25250095  | Ndor1         | ENSMUSG00000006471 | 0.0673317    | 0.209302     | 0.0302919   |
| 135 | 2   | 25272128  | 25272297  | Ssna1         | ENSMUSG00000026966 | 0.233109     | 0.168061     | 0.0190732   |
| 136 | 2   | 25353516  | 25353607  | Dpp7          | ENSMUSG00000026958 | 0.213225     | 0.324488     | 0.0450563   |
| 137 | 2   | 25888858  | 25890848  | Kcnt1         | ENSMUSG00000058740 | 0.290166     | 0.388407     | 0.045883    |
| 138 | 2   | 26958567  | 26960223  | Rexo4         | ENSMUSG00000052406 | 0.0662172    | 0.112757     | 0.0498851   |
| 139 | 2   | 29081077  | 29083532  | Ttf1          | ENSMUSG00000026803 | 0.0753392    | 0.243899     | 0.0409334   |
| 140 | 2   | 30348617  | 30349225  | Sh3glb2       | ENSMUSG00000026860 | 0.0860872    | 0.112079     | 0.0364859   |
| 141 | 2   | 31612558  | 31612836  | Fubp3         | ENSMUSG00000026843 | 0.094735     | 0.184673     | 0.0334148   |
| 142 | 2   | 32377362  | 32377508  | Ciz1          | ENSMUSG00000039205 | 0.337588     | 0.227017     | 0.0117975   |
| 143 | 2   | 34772146  | 34772228  | Hspa5         | ENSMUSG00000026864 | 0.442941     | 0.541755     | 0.00422339  |
| 144 | 2   | 69654373  | 69655498  | Bbs5          | ENSMUSG00000063145 | 0.0704518    | 0.165594     | 0.0309826   |
| 145 | 2   | 91278957  | 91279189  | 1110051M20Rik | ENSMUSG00000040591 | 0.0706786    | 0.113536     | 0.0101833   |
| 146 | 3   | 103171865 | 103171947 | Bcas2         | ENSMUSG00000005687 | 0.11066      | 0.172047     | 0.0176657   |
| 147 | 3   | 108905334 | 108907786 | Prpf38b       | ENSMUSG00000027881 | 0.104318     | 0.219383     | 0.0105215   |
| 148 | 3   | 157543244 | 157544963 | Zranb2        | ENSMUSG00000028180 | 0.06263      | 0.100332     | 0.00835433  |
| 149 | 3   | 158022950 | 158026724 | Srsf11        | ENSMUSG00000055436 | 0.163825     | 0.287866     | 0.00046872  |
| 150 | 3   | 28666228  | 28667898  | Tnik          | ENSMUSG00000027692 | 0.201803     | 0.365468     | 0.000746233 |
| 151 | 3   | 32561586  | 32563011  | Mfn1          | ENSMUSG00000027668 | 0.0782794    | 0.144052     | 0.0193875   |
| 152 | 3   | 89209421  | 89209504  | Mtx1          | ENSMUSG00000064068 | 0.155902     | 0.242816     | 0.0155782   |
| 153 | 3   | 89210448  | 89210583  | Mtx1          | ENSMUSG00000064068 | 0.113366     | 0.197769     | 0.00407339  |
| 154 | 3   | 94488279  | 94488526  | Celf3         | ENSMUSG00000028137 | 0.161222     | 0.204769     | 0.044957    |
| 155 | 3   | 95004754  | 95005758  | Pi4kb         | ENSMUSG00000038861 | 0.0392392    | 0.109311     | 0.00227005  |
| 156 | 3   | 95337265  | 95338345  | Setdb1        | ENSMUSG00000015697 | 0.20453      | 0.353381     | 0.0386391   |
| 157 | 3   | 95884237  | 95884969  | BC028528      | ENSMUSG00000038543 | 0.0670797    | 0.26379      | 0.0497826   |
| 158 | 4   | 115998615 | 115998820 | Faah          | ENSMUSG00000034171 | 0.0679385    | 0.102896     | 0.0426941   |
| 159 | 4   | 117889931 | 117890017 | Dph2          | ENSMUSG00000028540 | 0.025974     | 0.106977     | 0.0380243   |
| 160 | 4   | 124854016 | 124854474 | Yrdc          | ENSMUSG00000028889 | 0.0389425    | 0.100458     | 0.00405623  |
| 161 | 4   | 126237059 | 126237155 | Map7d1        | ENSMUSG00000028849 | 0.23681      | 0.418678     | 1.06268E-05 |
| 162 | 4   | 127027518 | 127029826 | Sfpq          | ENSMUSG00000028820 | 0.100324     | 0.183996     | 0.000314767 |
| 163 | 4   | 129621150 | 129622599 | Ccdc28b       | ENSMUSG00000028795 | 0.0771903    | 0.143134     | 0.0326075   |
| 164 | 4   | 132337910 | 132338050 | Rcc1          | ENSMUSG00000028896 | 0.0230415    | 0.104167     | 0.0453582   |
| 165 | 4   | 152312256 | 152312389 | Rnf207        | ENSMUSG00000058498 | 0.0246244    | 0.189982     | 0.0382876   |
| 166 | 4   | 154895037 | 154895125 | Mme11         | ENSMUSG00000058183 | 0.0100825    | 0.210526     | 0.042081    |
| 167 | 4   | 154961301 | 154961391 | Hes5          | ENSMUSG00000048001 | 0.247624     | 0.0886076    | 0.00260692  |
| 168 | 4   | 154991382 | 154992532 | Plch2         | ENSMUSG00000029055 | 0.0593559    | 0.121761     | 0.0283538   |
| 169 | 4   | 155885703 | 155886091 | Cpsf3l        | ENSMUSG00000029034 | 0.0774657    | 0.170133     | 0.0085987   |
| 170 | 4   | 155887521 | 155887604 | Cpsf3l        | ENSMUSG00000029034 | 0.0470588    | 0.122708     | 0.01265     |
| 171 | 4   | 155887962 | 155888047 | Cpsf3l        | ENSMUSG00000029034 | 0.0420379    | 0.112567     | 0.0282364   |

| S/N | Chr | Start     | End       | Gene     | Ensembl ID         | IR ratio 10w | IR ratio 22m | p-value    |
|-----|-----|-----------|-----------|----------|--------------------|--------------|--------------|------------|
| 172 | 4   | 156231173 | 156231546 | Klhl17   | ENSMUSG00000078484 | 0.0785543    | 0.149358     | 0.0355644  |
| 173 | 4   | 21869615  | 21870351  | Pnizr    | ENSMUSG00000028248 | 0.232757     | 0.357813     | 0.00360129 |
| 174 | 4   | 21874672  | 21874912  | Pnizr    | ENSMUSG00000028248 | 0.333758     | 0.249882     | 0.0441916  |
| 175 | 4   | 34571018  | 34571728  | Orc3     | ENSMUSG00000040044 | 0.129057     | 0.207413     | 0.0419427  |
| 176 | 4   | 34572572  | 34575031  | Orc3     | ENSMUSG00000040044 | 0.0948811    | 0.180451     | 0.013548   |
| 177 | 4   | 34575173  | 34576351  | Orc3     | ENSMUSG00000040044 | 0.139345     | 0.27071      | 0.00276343 |
| 178 | 4   | 41758238  | 41758502  | Galt     | ENSMUSG00000036073 | 0.0826508    | 0.148696     | 0.00115845 |
| 179 | 4   | 43008913  | 43009147  | Fancg    | ENSMUSG00000028453 | 0.0152644    | 0.165808     | 0.0419613  |
| 180 | 4   | 43570190  | 43570345  | Gba2     | ENSMUSG00000028467 | 0.144143     | 0.221371     | 0.0131248  |
| 181 | 4   | 49632211  | 49632364  | Rnf20    | ENSMUSG00000028309 | 0.628463     | 0.361279     | 0.00220086 |
| 182 | 4   | 62422300  | 62422414  | Prpf4    | ENSMUSG00000066148 | 0.0241287    | 0.117076     | 0.0233368  |
| 183 | 5   | 110104658 | 110104889 | Gtpbp6   | ENSMUSG00000033434 | 0.191568     | 0.249788     | 0.038344   |
| 184 | 5   | 110151686 | 110152335 | Chfr     | ENSMUSG00000014668 | 0.0533562    | 0.132915     | 0.0366753  |
| 185 | 5   | 110152490 | 110153117 | Chfr     | ENSMUSG00000014668 | 0.103934     | 0.20389      | 0.0270699  |
| 186 | 5   | 110162781 | 110164005 | Chfr     | ENSMUSG00000014668 | 0.135531     | 0.26419      | 0.0346051  |
| 187 | 5   | 117386858 | 117387868 | Rfc5     | ENSMUSG00000029363 | 0.0429168    | 0.149238     | 0.0469538  |
| 188 | 5   | 122718384 | 122718500 | P2rx4    | ENSMUSG00000029470 | 0.161715     | 0.0670661    | 0.0337599  |
| 189 | 5   | 123523381 | 123524070 | Diablo   | ENSMUSG00000029433 | 0.263558     | 0.442132     | 0.02677    |
| 190 | 5   | 124114645 | 124114714 | Ogfod2   | ENSMUSG00000023707 | 0.0835851    | 0.171429     | 0.00990262 |
| 191 | 5   | 135375485 | 135375554 | Nsun5    | ENSMUSG00000000916 | 0.0961538    | 0.239062     | 0.0372863  |
| 192 | 5   | 137372217 | 137372384 | Ephb4    | ENSMUSG00000029710 | 0.136986     | 0.00119284   | 0.0202855  |
| 193 | 5   | 137554140 | 137554512 | Actl6b   | ENSMUSG00000029712 | 0.165677     | 0.292902     | 0.0120717  |
| 194 | 5   | 137642013 | 137642095 | Sap25    | ENSMUSG00000079165 | 0.00689655   | 0.154013     | 0.0424491  |
| 195 | 5   | 138176118 | 138176209 | Ap4m1    | ENSMUSG00000019518 | 0.0539895    | 0.141308     | 0.0409362  |
| 196 | 5   | 138177973 | 138178068 | Ap4m1    | ENSMUSG00000019518 | 0.236711     | 0.477312     | 0.0154204  |
| 197 | 5   | 24438949  | 24439055  | Slc4a2   | ENSMUSG00000028962 | 0.293536     | 0.158273     | 0.019301   |
| 198 | 5   | 24439145  | 24439231  | Slc4a2   | ENSMUSG00000028962 | 0.226989     | 0.113373     | 0.0347675  |
| 199 | 5   | 3630112   | 3630188   | Pex1     | ENSMUSG00000005907 | 0.132623     | 0.259971     | 0.0493686  |
| 200 | 5   | 73639514  | 73639788  | Sgcb     | ENSMUSG00000029156 | 0.0662103    | 0.142939     | 0.00100101 |
| 201 | 6   | 115619916 | 115620208 | Raf1     | ENSMUSG00000000441 | 0.0796051    | 0.124054     | 0.0381742  |
| 202 | 6   | 146557622 | 146560125 | Asun     | ENSMUSG00000040250 | 0.0744611    | 0.165704     | 0.0413477  |
| 203 | 6   | 30742220  | 30742527  | Mest     | ENSMUSG00000051855 | 0.112053     | 0.192142     | 0.0163027  |
| 204 | 6   | 30742852  | 30743013  | Mest     | ENSMUSG00000051855 | 0.113816     | 0.215848     | 0.00867979 |
| 205 | 6   | 30743072  | 30744353  | Mest     | ENSMUSG00000051855 | 0.0806437    | 0.164431     | 0.00631061 |
| 206 | 6   | 30744932  | 30745081  | Mest     | ENSMUSG00000051855 | 0.154068     | 0.220596     | 0.0310226  |
| 207 | 6   | 30745183  | 30745829  | Mest     | ENSMUSG00000051855 | 0.130768     | 0.22873      | 0.0127286  |
| 208 | 6   | 30745906  | 30746261  | Mest     | ENSMUSG00000051855 | 0.109836     | 0.234043     | 0.00852586 |
| 209 | 6   | 30749899  | 30750537  | Copg2    | ENSMUSG00000025607 | 0.155564     | 0.216316     | 0.0207997  |
| 210 | 6   | 90405443  | 90406017  | Cfap100  | ENSMUSG00000048794 | 0.0182768    | 0.307659     | 0.0301408  |
| 211 | 7   | 102015835 | 102016042 | Il18bp   | ENSMUSG00000070427 | 0.205416     | 0.489086     | 0.0439968  |
| 212 | 7   | 113553813 | 113561375 | Far1     | ENSMUSG00000030759 | 0.0705356    | 0.132557     | 0.0231456  |
| 213 | 7   | 141064555 | 141064640 | B4galnt4 | ENSMUSG00000055629 | 0.057652     | 0.102015     | 0.031045   |
| 214 | 7   | 141191194 | 141191341 | Hras     | ENSMUSG00000025499 | 0.415696     | 0.361964     | 0.00382473 |
| 215 | 7   | 16178795  | 16178950  | Meis3    | ENSMUSG00000041420 | 0.0801782    | 0.149247     | 0.0283313  |
| 216 | 7   | 24912155  | 24912309  | Arhgef1  | ENSMUSG00000040940 | 0.0638298    | 0.180489     | 0.00868527 |
| 217 | 7   | 28815352  | 28818460  | Hnrnp1   | ENSMUSG00000015165 | 0.137149     | 0.174008     | 0.0464375  |
| 218 | 7   | 29225259  | 29225471  | Kcnk6    | ENSMUSG00000046410 | 0.0146341    | 0.189189     | 0.0471441  |
| 219 | 7   | 30583755  | 30583916  | Kmt2b    | ENSMUSG00000006307 | 0.119769     | 0.0447855    | 0.0476407  |

| S/N | Chr | Start     | End       | Gene          | Ensembl ID         | IR ratio 10w | IR ratio 22m | p-value     |
|-----|-----|-----------|-----------|---------------|--------------------|--------------|--------------|-------------|
| 220 | 7   | 31063175  | 31063284  | Lgi4          | ENSMUSG00000036560 | 0.117014     | 0.0484528    | 0.0180917   |
| 221 | 7   | 31117136  | 31117223  | Scn1b         | ENSMUSG00000019194 | 0.26152      | 0.241833     | 0.0456812   |
| 222 | 7   | 45834481  | 45834638  | Grin2d        | ENSMUSG00000002771 | 0.749083     | 0.528992     | 0.0166591   |
| 223 | 7   | 80098272  | 80098770  | ldh2          | ENSMUSG00000030541 | 0.047237     | 0.112902     | 0.00771467  |
| 224 | 7   | 80285630  | 80285833  | Vps33b        | ENSMUSG00000030534 | 0.0522627    | 0.140894     | 0.0249311   |
| 225 | 8   | 105331290 | 105331369 | Fhod1         | ENSMUSG00000014778 | 0.083004     | 0.335878     | 0.0331519   |
| 226 | 8   | 111075255 | 111075415 | Clec18a       | ENSMUSG00000033633 | 0.022536     | 0.23506      | 0.0385715   |
| 227 | 8   | 122470356 | 122475862 | Rnf166        | ENSMUSG00000014470 | 0.0629849    | 0.163278     | 0.0247238   |
| 228 | 8   | 122482991 | 122483056 | Piezo1        | ENSMUSG00000014444 | 0.421053     | 0.0952381    | 0.0223149   |
| 229 | 8   | 3512865   | 3514782   | Mcoln1        | ENSMUSG00000004567 | 0.096264     | 0.141622     | 0.0193072   |
| 230 | 8   | 3514913   | 3515013   | Mcoln1        | ENSMUSG00000004567 | 0.0646507    | 0.122085     | 0.00939481  |
| 231 | 8   | 4265276   | 4266555   | Timm44        | ENSMUSG00000002949 | 0.100053     | 0.19025      | 0.00194102  |
| 232 | 8   | 45980492  | 45980572  | Ufsp2         | ENSMUSG00000031634 | 0.10873      | 0.0657114    | 0.0287156   |
| 233 | 8   | 70028774  | 70029207  | Mau2          | ENSMUSG00000031858 | 0.0724925    | 0.146169     | 0.00597943  |
| 234 | 8   | 70597768  | 70598012  | Ssbp4         | ENSMUSG00000070003 | 0.11617      | 0.181528     | 0.00212209  |
| 235 | 8   | 70598617  | 70598701  | Ssbp4         | ENSMUSG00000070003 | 0.256667     | 0.323542     | 0.0116868   |
| 236 | 8   | 71621896  | 71622702  | Colgalt1      | ENSMUSG00000034807 | 0.306827     | 0.46713      | 0.0105412   |
| 237 | 8   | 83721852  | 83722229  | Ddx39         | ENSMUSG00000005481 | 0.280432     | 0.434325     | 0.0313095   |
| 238 | 9   | 106435704 | 106435783 | Acy1          | ENSMUSG00000023262 | 0.0108485    | 0.129744     | 0.0182602   |
| 239 | 9   | 107756992 | 107759775 | Rbm5          | ENSMUSG00000032580 | 0.226561     | 0.328174     | 0.0250692   |
| 240 | 9   | 107759849 | 107760321 | Rbm5          | ENSMUSG00000032580 | 0.260048     | 0.410895     | 0.00147141  |
| 241 | 9   | 108051960 | 108052034 | Rnf123        | ENSMUSG00000041528 | 0.104179     | 0.0505939    | 0.0154605   |
| 242 | 9   | 108299458 | 108299744 | Amt           | ENSMUSG00000032607 | 0.195924     | 0.312825     | 0.0442893   |
| 243 | 9   | 108571864 | 108571940 | Dalrd3        | ENSMUSG00000019039 | 0.299889     | 0.237276     | 0.032269    |
| 244 | 9   | 110391681 | 110391766 | Ptpn23        | ENSMUSG00000036057 | 0.0416667    | 0.13121      | 0.0258719   |
| 245 | 9   | 111228626 | 111229839 | Mlh1          | ENSMUSG00000032498 | 0.122426     | 0.319258     | 0.0254184   |
| 246 | 9   | 113956068 | 113956706 | Ubp1          | ENSMUSG00000009741 | 0.254861     | 0.345675     | 0.0423795   |
| 247 | 9   | 20869653  | 20871196  | A230050P20Rik | ENSMUSG00000038884 | 0.140588     | 0.208159     | 0.0122813   |
| 248 | 9   | 21073318  | 21073388  | Fdx1l         | ENSMUSG00000079677 | 0.389951     | 0.287785     | 0.0441914   |
| 249 | 9   | 21419548  | 21419624  | Qtrt1         | ENSMUSG00000002825 | 0.155779     | 0.29771      | 0.0131774   |
| 250 | 9   | 35217747  | 35217928  | Fam118b       | ENSMUSG00000050471 | 0.101313     | 0.184701     | 0.0378107   |
| 251 | 9   | 37417502  | 37417690  | Robo3         | ENSMUSG00000032128 | 0.0453155    | 0.137036     | 0.0155276   |
| 252 | 9   | 44412483  | 44412916  | Ccdc84        | ENSMUSG00000043923 | 0.394337     | 0.663705     | 0.0427166   |
| 253 | 9   | 44413201  | 44413442  | Ccdc84        | ENSMUSG00000043923 | 0.21067      | 0.458703     | 0.028044    |
| 254 | 9   | 45859059  | 45859278  | Bace1         | ENSMUSG00000032086 | 0.215225     | 0.281131     | 0.0353713   |
| 255 | 9   | 45859450  | 45860053  | Bace1         | ENSMUSG00000032086 | 0.152369     | 0.215571     | 0.0215636   |
| 256 | 9   | 48474513  | 48475119  | Rexo2         | ENSMUSG00000032026 | 0.212042     | 0.263468     | 0.0275391   |
| 257 | 9   | 50576705  | 50577760  | Il18          | ENSMUSG00000039217 | 0.0948961    | 0.186775     | 0.015786    |
| 258 | 9   | 73036821  | 73038622  | Pigb          | ENSMUSG00000079469 | 0.0174105    | 0.331638     | 0.000988998 |
| 259 | 9   | 97445713  | 97454582  | Clstn2        | ENSMUSG00000032452 | 0.409536     | 0.552184     | 0.00970771  |
| 260 | X   | 101652208 | 101655623 | Ogt           | ENSMUSG00000034160 | 0.159896     | 0.278715     | 0.000135383 |
| 261 | X   | 134080437 | 134081190 | Cstf2         | ENSMUSG00000031256 | 0.23875      | 0.340659     | 0.0191541   |
| 262 | X   | 160529015 | 160529914 | Phka2         | ENSMUSG00000031295 | 0.0840734    | 0.245388     | 0.0227003   |
| 263 | X   | 20851812  | 20851929  | Araf          | ENSMUSG00000001127 | 0.143426     | 0.119053     | 0.0340804   |
| 264 | X   | 73657343  | 73657437  | Pnck          | ENSMUSG00000002012 | 0.0631703    | 0.116503     | 0.00685457  |
| 265 | X   | 73767881  | 73767957  | Plxnb3        | ENSMUSG00000031385 | 0.273282     | 0.10828      | 0.0427998   |
| 266 | X   | 74021963  | 74022184  | Irak1         | ENSMUSG00000031392 | 0.0552234    | 0.133958     | 0.00852865  |
| 267 | X   | 74288714  | 74289104  | Taz           | ENSMUSG00000009995 | 0.205946     | 0.285422     | 0.0468243   |

| S/N | Chr | Start    | End      | Gene   | Ensembl ID         | IR ratio 10w | IR ratio 22m | p-value   |
|-----|-----|----------|----------|--------|--------------------|--------------|--------------|-----------|
| 268 | X   | 74333846 | 74334224 | Plxna3 | ENSMUSG00000031398 | 0.096603     | 0.308842     | 0.0355854 |
| 269 | X   | 74339625 | 74339774 | Plxna3 | ENSMUSG00000031398 | 0.0106762    | 0.153143     | 0.0119493 |

**Table S3: Differential retained introns between 2 weeks & 22 months mouse frontal cortex (Lister et al, 2013)**

| S/N | Chr | Start     | End       | Gene     | GeneID             | IR ratio 2w | IR ratio 22m | p-value     |
|-----|-----|-----------|-----------|----------|--------------------|-------------|--------------|-------------|
| 1   | 1   | 36701901  | 36702058  | Actr1b   | ENSMUSG00000037351 | 0.109256    | 0.0763732    | 0.0045921   |
| 2   | 1   | 37437478  | 37438681  | Unc50    | ENSMUSG00000026111 | 0.0697683   | 0.119267     | 0.0206279   |
| 3   | 1   | 38053718  | 38053839  | Rev1     | ENSMUSG00000026082 | 0.00349127  | 0.109848     | 0.000338569 |
| 4   | 1   | 75441827  | 75441984  | Gmppa    | ENSMUSG00000033021 | 0.0867148   | 0.206151     | 0.00054853  |
| 5   | 1   | 75442031  | 75442184  | Gmppa    | ENSMUSG00000033021 | 0.12125     | 0.218837     | 0.0221419   |
| 6   | 1   | 75507518  | 75509333  | Inha     | ENSMUSG00000032968 | 0.286056    | 0.424783     | 0.0221359   |
| 7   | 1   | 91424486  | 91427738  | Per2     | ENSMUSG00000055866 | 0.0106805   | 0.121902     | 0.0401769   |
| 8   | 10  | 127185172 | 127185286 | Arhgef25 | ENSMUSG00000019467 | 0.138129    | 0.0756809    | 0.0021906   |
| 9   | 10  | 127191039 | 127191335 | Dtx3     | ENSMUSG00000040415 | 0.219939    | 0.161327     | 0.000698579 |
| 10  | 10  | 127296633 | 127296716 | Mars     | ENSMUSG00000040354 | 0.271848    | 0.124412     | 0.000143834 |
| 11  | 10  | 127520171 | 127520337 | Shmt2    | ENSMUSG00000025403 | 0.228544    | 0.0690432    | 0.00503148  |
| 12  | 10  | 128124262 | 128124334 | Baz2a    | ENSMUSG00000040054 | 0.151713    | 0.0352113    | 0.00545483  |
| 13  | 10  | 128315657 | 128315775 | Pan2     | ENSMUSG00000005682 | 0.0127496   | 0.15547      | 0.0368281   |
| 14  | 10  | 128318342 | 128318944 | Pan2     | ENSMUSG00000005682 | 0.058225    | 0.167519     | 0.026786    |
| 15  | 10  | 20261983  | 20266735  | Map7     | ENSMUSG00000019996 | 0.0326198   | 0.10135      | 0.0235527   |
| 16  | 10  | 41488097  | 41488176  | Smpd2    | ENSMUSG00000019822 | 0.213419    | 0.0958904    | 0.028975    |
| 17  | 10  | 61342949  | 61343040  | Pald1    | ENSMUSG00000020092 | 0.0103586   | 0.121302     | 0.039791    |
| 18  | 10  | 75509833  | 75510031  | Gucd1    | ENSMUSG00000033416 | 0.0738162   | 0.193901     | 0.0383744   |
| 19  | 10  | 78589745  | 78589901  | Syde1    | ENSMUSG00000032714 | 0.2         | 0.04         | 0.0354938   |
| 20  | 10  | 79621187  | 79622254  | Shc2     | ENSMUSG00000020312 | 0.0853572   | 0.175018     | 0.0138356   |
| 21  | 10  | 79737509  | 79737599  | Polrmt   | ENSMUSG00000020329 | 0.167931    | 0.0900099    | 0.044938    |
| 22  | 10  | 79918917  | 79919426  | Kiss1r   | ENSMUSG00000035773 | 0.146991    | 0.0138867    | 0.0439158   |
| 23  | 10  | 80004850  | 80004953  | Abca7    | ENSMUSG00000035722 | 0.170213    | 0.0401969    | 0.0483639   |
| 24  | 10  | 80027727  | 80027820  | Hmha1    | ENSMUSG00000035697 | 0.25        | 0.00683761   | 0.0209931   |
| 25  | 10  | 80170764  | 80170981  | Cirbp    | ENSMUSG00000045193 | 0.111684    | 0.0766527    | 0.0329606   |
| 26  | 10  | 80347625  | 80348355  | Adamts15 | ENSMUSG00000043822 | 1           | 0.0424935    | 0.000714369 |
| 27  | 10  | 80393018  | 80393094  | Mbd3     | ENSMUSG00000035478 | 0.181425    | 0.110048     | 0.00022641  |
| 28  | 10  | 80862362  | 80862698  | Sppl2b   | ENSMUSG00000035206 | 0.0814148   | 0.141977     | 0.0356677   |
| 29  | 10  | 80866660  | 80867399  | Sppl2b   | ENSMUSG00000035206 | 0.155439    | 0.233768     | 0.0451916   |
| 30  | 10  | 81394150  | 81394775  | Smim24   | ENSMUSG00000078439 | 0.00268197  | 0.173222     | 0.0214335   |
| 31  | 10  | 83611066  | 83611142  | Appl2    | ENSMUSG00000020263 | 0.123007    | 0.197917     | 0.0407415   |
| 32  | 11  | 101092591 | 101092723 | Psmc3ip  | ENSMUSG00000019303 | 0.00860421  | 0.18734      | 0.0106971   |
| 33  | 11  | 101183582 | 101183851 | Cntnap1  | ENSMUSG00000017167 | 0.11418     | 0.0426867    | 7.1262E-06  |
| 34  | 11  | 101253807 | 101254030 | Vps25    | ENSMUSG00000078656 | 0.133089    | 0.0845826    | 0.0354254   |
| 35  | 11  | 103339276 | 103339454 | Arhgap27 | ENSMUSG00000034255 | 0.2         | 0.0416792    | 0.0371508   |
| 36  | 11  | 106378963 | 106380666 | Icam2    | ENSMUSG00000001029 | 0.00746509  | 0.134467     | 0.0195152   |
| 37  | 11  | 113657149 | 113657374 | Cog1     | ENSMUSG00000018661 | 0.136556    | 0.0388287    | 0.000816862 |
| 38  | 11  | 115476027 | 115476121 | Armc7    | ENSMUSG00000057219 | 0.24758     | 0.0952381    | 0.0228743   |
| 39  | 11  | 115588003 | 115588311 | Gga3     | ENSMUSG00000020740 | 0.219314    | 0.143829     | 0.0389379   |
| 40  | 11  | 115815238 | 115815326 | Tsen54   | ENSMUSG00000020781 | 0.333333    | 0.0789474    | 0.0119843   |
| 41  | 11  | 116138621 | 116138710 | Mrpl38   | ENSMUSG00000020775 | 0.18056     | 0.091653     | 0.0102708   |
| 42  | 11  | 119040159 | 119040347 | Cbx8     | ENSMUSG00000025578 | 0.101773    | 0.0165054    | 0.0271207   |
| 43  | 11  | 120008444 | 120009274 | Aatk     | ENSMUSG00000025375 | 0.126907    | 0.238871     | 4.05385E-07 |

| S/N | Chr | Start     | End       | Gene     | GeneID             | IR ratio 2w | IR ratio 22m | p-value     |
|-----|-----|-----------|-----------|----------|--------------------|-------------|--------------|-------------|
| 44  | 11  | 120067038 | 120067129 | Cep131   | ENSMUSG00000039781 | 0.128903    | 0.0400979    | 0.0185829   |
| 45  | 11  | 120374651 | 120375416 | Faap100  | ENSMUSG00000025384 | 0.0329787   | 0.117747     | 0.019974    |
| 46  | 11  | 120612083 | 120612462 | Pcyt2    | ENSMUSG00000025137 | 0.237042    | 0.152039     | 0.00381146  |
| 47  | 11  | 120620504 | 120620646 | Sirt7    | ENSMUSG00000025138 | 0.416085    | 0.617077     | 0.00791719  |
| 48  | 11  | 120642962 | 120643158 | Pycr1    | ENSMUSG00000025140 | 0.00089526  | 0.22449      | 0.021883    |
| 49  | 11  | 120717902 | 120718036 | Lrrc45   | ENSMUSG00000025145 | 0.429569    | 0.579568     | 0.0286039   |
| 50  | 11  | 120730523 | 120730617 | Cbr2     | ENSMUSG00000025150 | 0.2         | 0.0147884    | 0.0278265   |
| 51  | 11  | 120788596 | 120788669 | Gps1     | ENSMUSG00000025156 | 0.174881    | 0.13752      | 0.00974505  |
| 52  | 11  | 121221337 | 121221500 | Hexdc    | ENSMUSG00000039307 | 0.183711    | 0.269601     | 0.0265704   |
| 53  | 11  | 32214109  | 32214181  | Rhbdf1   | ENSMUSG00000020282 | 0.00564301  | 0.158031     | 0.00207516  |
| 54  | 11  | 3524726   | 3524882   | Smtn     | ENSMUSG00000020439 | 0.0529248   | 0.20464      | 0.0476005   |
| 55  | 11  | 4139858   | 4139934   | Rnf215   | ENSMUSG00000003581 | 0.149798    | 0.252369     | 0.0325701   |
| 56  | 11  | 5078952   | 5079484   | Ewsr1    | ENSMUSG00000009079 | 0.135854    | 0.101626     | 0.0470098   |
| 57  | 11  | 5116924   | 5128869   | Emid1    | ENSMUSG00000034164 | 0.0120965   | 0.254937     | 0.00109609  |
| 58  | 11  | 5801839   | 5802998   | Pgam2    | ENSMUSG00000020475 | 0.497174    | 0.17977      | 0.000745823 |
| 59  | 11  | 5803179   | 5803274   | Pgam2    | ENSMUSG00000020475 | 0.181287    | 0.0580737    | 0.0331675   |
| 60  | 11  | 60194032  | 60197788  | Rai1     | ENSMUSG00000062115 | 0.118468    | 0.0660214    | 0.0403005   |
| 61  | 11  | 61450902  | 61450977  | Rnf112   | ENSMUSG00000010086 | 0.392641    | 0.313002     | 0.000239393 |
| 62  | 11  | 62318030  | 62319365  | Ncor1    | ENSMUSG00000018501 | 0.0695276   | 0.140209     | 0.000176442 |
| 63  | 11  | 62321217  | 62321391  | Ncor1    | ENSMUSG00000018501 | 0.15603     | 0.253421     | 0.00154208  |
| 64  | 11  | 62321445  | 62325486  | Ncor1    | ENSMUSG00000018501 | 0.0808219   | 0.159335     | 0.0014402   |
| 65  | 11  | 69330226  | 69330396  | Kcnab3   | ENSMUSG00000018470 | 0.13455     | 0.0313885    | 0.000337177 |
| 66  | 11  | 69557492  | 69559691  | Efnb3    | ENSMUSG00000003934 | 0.0607748   | 0.117593     | 0.0146443   |
| 67  | 11  | 69915954  | 69916032  | Gps2     | ENSMUSG00000023170 | 0.171975    | 0.0933621    | 0.0236838   |
| 68  | 11  | 70216051  | 70216136  | Slc16a11 | ENSMUSG00000040938 | 0.426684    | 0.283177     | 0.0435037   |
| 69  | 11  | 74905316  | 74905890  | Tsr1     | ENSMUSG00000038335 | 0.694505    | 0.842672     | 0.00935962  |
| 70  | 11  | 75524137  | 75525369  | Scarf1   | ENSMUSG00000038188 | 0.0206371   | 0.406277     | 0.00869774  |
| 71  | 11  | 78034136  | 78034274  | Dhrs13   | ENSMUSG00000020834 | 0.00396558  | 0.102538     | 0.0127362   |
| 72  | 11  | 78315108  | 78315187  | Spag5    | ENSMUSG00000002055 | 0.0119332   | 0.246753     | 0.00592054  |
| 73  | 11  | 78320672  | 78321042  | Spag5    | ENSMUSG00000002055 | 0.222462    | 0.0243902    | 0.01356     |
| 74  | 11  | 78470851  | 78471370  | Slc46a1  | ENSMUSG00000020829 | 0.621037    | 0.383057     | 0.00710527  |
| 75  | 11  | 78540998  | 78541360  | lft20    | ENSMUSG00000001105 | 0.0663142   | 0.103064     | 0.030185    |
| 76  | 11  | 82795452  | 82795708  | Lig3     | ENSMUSG00000020697 | 0.0667773   | 0.16088      | 0.0295672   |
| 77  | 11  | 83766160  | 83767077  | Heatr6   | ENSMUSG00000000976 | 0.315094    | 0.0596792    | 0.0414359   |
| 78  | 11  | 84821468  | 84821664  | Dhrs11   | ENSMUSG00000034449 | 0.00166134  | 0.121951     | 0.01381     |
| 79  | 11  | 87589818  | 87589955  | Sep-04   | ENSMUSG00000020486 | 0.136907    | 0.0744922    | 0.000120331 |
| 80  | 11  | 9010417   | 9010496   | Hus1     | ENSMUSG00000020413 | 0.0005571   | 0.230681     | 0.00678369  |
| 81  | 11  | 9010624   | 9011058   | Hus1     | ENSMUSG00000020413 | 0.777487    | 0.43682      | 0.0370291   |
| 82  | 11  | 94542984  | 94543293  | Rsad1    | ENSMUSG00000039096 | 0.0208375   | 0.170717     | 0.000996405 |
| 83  | 11  | 98716525  | 98717708  | Med24    | ENSMUSG00000017210 | 0.139687    | 0.0774493    | 0.00585547  |
| 84  | 11  | 98717765  | 98717909  | Med24    | ENSMUSG00000017210 | 0.15413     | 0.105727     | 0.0360045   |
| 85  | 11  | 99418135  | 99418273  | Krt12    | ENSMUSG00000020912 | 0.686452    | 0.40939      | 8.13396E-06 |
| 86  | 12  | 105809662 | 105811036 | Papola   | ENSMUSG00000021111 | 0.139732    | 0.275206     | 0.00177108  |
| 87  | 12  | 109034351 | 109035327 | Begain   | ENSMUSG00000040867 | 0.118713    | 0.0726782    | 0.00280969  |
| 88  | 12  | 112123039 | 112123289 | Aspg     | ENSMUSG00000037686 | 1           | 0.0604491    | 0.0037      |
| 89  | 12  | 112912614 | 112912692 | Jag2     | ENSMUSG00000002799 | 0.184674    | 0.0422535    | 0.000462491 |
| 90  | 12  | 112976982 | 112977058 | Btbd6    | ENSMUSG00000002803 | 0.262579    | 0.188101     | 0.0449921   |
| 91  | 12  | 31327821  | 31329109  | Lamb1    | ENSMUSG00000002900 | 0.14778     | 0.415156     | 0.00085673  |

| S/N | Chr | Start     | End       | Gene          | GeneID              | IR ratio 2w | IR ratio 22m | p-value     |
|-----|-----|-----------|-----------|---------------|---------------------|-------------|--------------|-------------|
| 92  | 12  | 31329269  | 31329356  | Lamb1         | ENSMUSG00000002900  | 0.149264    | 0.30855      | 0.0144684   |
| 93  | 12  | 56337455  | 56337763  | Mbip          | ENSMUSG000000021028 | 0.138877    | 0.3046       | 0.0396311   |
| 94  | 12  | 56340297  | 56340384  | Mbip          | ENSMUSG000000021028 | 0.152344    | 0.313867     | 0.0135343   |
| 95  | 12  | 79076596  | 79076705  | Plekhh1       | ENSMUSG000000060716 | 0.145833    | 0.0185827    | 0.0305633   |
| 96  | 12  | 79147765  | 79149868  | Arg2          | ENSMUSG000000021125 | 0.0335957   | 0.507725     | 0.000332086 |
| 97  | 12  | 79151057  | 79151921  | Arg2          | ENSMUSG000000021125 | 0.0114861   | 0.29541      | 0.00195313  |
| 98  | 12  | 80169016  | 80170182  | Actn1         | ENSMUSG000000015143 | 0.120554    | 0.0754926    | 0.0243624   |
| 99  | 12  | 80637610  | 80640956  | Erh           | ENSMUSG000000021131 | 0.0444051   | 0.177123     | 0.0347977   |
| 100 | 13  | 111686354 | 111687827 | Mier3         | ENSMUSG000000032727 | 1           | 0.0448493    | 0.0168411   |
| 101 | 13  | 13995783  | 13996892  | B3galnt2      | ENSMUSG000000039242 | 0.0711133   | 0.230846     | 0.018448    |
| 102 | 13  | 13998181  | 13998362  | Tbce          | ENSMUSG000000039233 | 0.142631    | 0.246956     | 0.00499213  |
| 103 | 13  | 19370367  | 19370479  | Stard3nl      | ENSMUSG00000003062  | 0.0693026   | 0.144018     | 0.00047148  |
| 104 | 13  | 24831929  | 24832009  | Tdp2          | ENSMUSG000000035958 | 0.122257    | 0.0385802    | 0.0462465   |
| 105 | 13  | 49203789  | 49203928  | Card19        | ENSMUSG000000037960 | 0.430788    | 0.199348     | 0.0215617   |
| 106 | 13  | 49464786  | 49465678  | Cenpp         | ENSMUSG000000021391 | 0.0684211   | 0.384654     | 0.0377654   |
| 107 | 13  | 51682154  | 51682443  | Secisbp2      | ENSMUSG000000035139 | 0.199717    | 0.031116     | 0.00794535  |
| 108 | 13  | 55320553  | 55320744  | Rab24         | ENSMUSG000000034789 | 0.192615    | 0.0940407    | 0.000014226 |
| 109 | 13  | 55507366  | 55507487  | Pdlim7        | ENSMUSG000000021493 | 0.349804    | 0.176755     | 2.54378E-05 |
| 110 | 13  | 55531684  | 55531831  | Ddx41         | ENSMUSG000000021494 | 0.10292     | 0.0497653    | 0.03221     |
| 111 | 13  | 55534488  | 55535288  | Ddx41         | ENSMUSG000000021494 | 0.214244    | 0.139055     | 0.0377811   |
| 112 | 13  | 55535619  | 55535729  | Ddx41         | ENSMUSG000000021494 | 0.121821    | 0.0326481    | 0.000751857 |
| 113 | 13  | 55535804  | 55535885  | Ddx41         | ENSMUSG000000021494 | 0.145781    | 0.0638596    | 0.0124204   |
| 114 | 13  | 55536406  | 55536480  | Ddx41         | ENSMUSG000000021494 | 0.102302    | 0.00156006   | 0.00446124  |
| 115 | 13  | 68611277  | 68612829  | 1700001L19Rik | ENSMUSG000000021534 | 0.0505791   | 0.135608     | 0.00121368  |
| 116 | 13  | 9689248   | 9689451   | Zmynd11       | ENSMUSG000000021156 | 0.106198    | 0.0653012    | 0.00396144  |
| 117 | 13  | 98272852  | 98273377  | Ankra2        | ENSMUSG000000021661 | 0.167307    | 0.241199     | 0.0349511   |
| 118 | 14  | 119029042 | 119032193 | Uggt2         | ENSMUSG000000042104 | 0.00806684  | 0.101973     | 0.0399226   |
| 119 | 14  | 123972231 | 123973284 | Itgbl1        | ENSMUSG000000032925 | 0.332148    | 0.751498     | 0.00607043  |
| 120 | 14  | 14095601  | 14095699  | Atxn7         | ENSMUSG000000021738 | 0.186441    | 0.0404569    | 0.0144217   |
| 121 | 14  | 20719672  | 20719812  | Zswim8        | ENSMUSG000000021819 | 0.209608    | 0.103261     | 0.000703047 |
| 122 | 14  | 30917787  | 30918274  | Itih3         | ENSMUSG000000006522 | 0.428388    | 0.149066     | 0.00484725  |
| 123 | 14  | 31011030  | 31011120  | Glt8d1        | ENSMUSG000000021916 | 0.257927    | 0.115348     | 0.00357608  |
| 124 | 14  | 31260547  | 31261045  | Dnah1         | ENSMUSG000000019027 | 0.551487    | 0.128639     | 0.0380918   |
| 125 | 14  | 31261280  | 31261488  | Dnah1         | ENSMUSG000000019027 | 0.683794    | 0.209798     | 0.0293727   |
| 126 | 14  | 31265055  | 31265262  | Dnah1         | ENSMUSG000000019027 | 1           | 0.0728606    | 0.00782966  |
| 127 | 14  | 31266030  | 31266314  | Dnah1         | ENSMUSG000000019027 | 0.356725    | 0.0480179    | 0.0371817   |
| 128 | 14  | 45371091  | 45372384  | Styx          | ENSMUSG000000053205 | 0.0134248   | 0.136565     | 0.0433735   |
| 129 | 14  | 52296581  | 52296663  | Mettl3        | ENSMUSG000000022160 | 0.0951276   | 0.250669     | 0.00691652  |
| 130 | 14  | 55494893  | 55495403  | Carmil3       | ENSMUSG000000022211 | 0.0390273   | 0.113664     | 0.0385136   |
| 131 | 14  | 55898012  | 55898242  | Sdr39u1       | ENSMUSG000000022223 | 0.194312    | 0.323038     | 0.000119211 |
| 132 | 14  | 70193459  | 70193560  | Sorbs3        | ENSMUSG000000022091 | 0.125       | 0.00361627   | 0.00209715  |
| 133 | 14  | 70547780  | 70547939  | Reep4         | ENSMUSG000000033589 | 0.04        | 0.261884     | 0.00713849  |
| 134 | 15  | 102109433 | 102109512 | Tns2          | ENSMUSG000000037003 | 0.125       | 0.0254201    | 0.0354938   |
| 135 | 15  | 102178832 | 102178960 | Csad          | ENSMUSG000000023044 | 0.138584    | 0.0537634    | 0.0467009   |
| 136 | 15  | 31606188  | 31608095  | Fam173b       | ENSMUSG000000039065 | 0.00948115  | 0.13165      | 0.0260123   |
| 137 | 15  | 74582987  | 74584377  | Adgrb1        | ENSMUSG000000034730 | 0.0652778   | 0.127258     | 6.44849E-08 |
| 138 | 15  | 75893220  | 75893305  | Naprt         | ENSMUSG000000022574 | 0.0180033   | 0.234568     | 0.03125     |
| 139 | 15  | 75893847  | 75894016  | Naprt         | ENSMUSG000000022574 | 0.0290076   | 0.283898     | 0.046656    |

| S/N | Chr | Start    | End      | Gene     | GeneID             | IR ratio 2w | IR ratio 22m | p-value     |
|-----|-----|----------|----------|----------|--------------------|-------------|--------------|-------------|
| 140 | 15  | 75925662 | 75925792 | Tsta3    | ENSMUSG00000022570 | 0.17639     | 0.0953637    | 0.023717    |
| 141 | 15  | 75928543 | 75928891 | Tsta3    | ENSMUSG00000022570 | 0.103691    | 0.21193      | 0.0241373   |
| 142 | 15  | 76049301 | 76049456 | Scrib    | ENSMUSG00000022568 | 0.220856    | 0.0776337    | 0.00684386  |
| 143 | 15  | 76537006 | 76537089 | Fbxl6    | ENSMUSG00000022559 | 0.147727    | 0.0737941    | 0.0168749   |
| 144 | 15  | 76596349 | 76596415 | Cpsf1    | ENSMUSG00000034022 | 0.221355    | 0.125428     | 0.00983943  |
| 145 | 15  | 79531914 | 79535956 | Ddx17    | ENSMUSG00000055065 | 0.330406    | 0.468473     | 3.23462E-05 |
| 146 | 15  | 82374056 | 82374297 | Cyp2d22  | ENSMUSG00000061740 | 0.00954014  | 0.105584     | 0.0201396   |
| 147 | 15  | 98122263 | 98122629 | Pfkm     | ENSMUSG00000033065 | 0.103203    | 0.0678482    | 0.001132    |
| 148 | 15  | 98815740 | 98815875 | Prkag1   | ENSMUSG00000067713 | 0.0838323   | 0.162716     | 0.00441148  |
| 149 | 15  | 99305193 | 99305407 | Prpf40b  | ENSMUSG00000023007 | 0.0490756   | 0.110229     | 0.046436    |
| 150 | 16  | 10419685 | 10420255 | Nubp1    | ENSMUSG00000022503 | 0.130792    | 0.334748     | 0.000271877 |
| 151 | 16  | 17277039 | 17277193 | Tmem191c | ENSMUSG00000055692 | 0.267496    | 0.182971     | 0.000448298 |
| 152 | 16  | 17803600 | 17803736 | Scarf2   | ENSMUSG00000012017 | 0.432727    | 0.0714286    | 0.0316375   |
| 153 | 16  | 18795226 | 18795824 | Cdc45    | ENSMUSG00000000028 | 0.248886    | 0.0106215    | 0.0403814   |
| 154 | 16  | 20642373 | 20642472 | Ece2     | ENSMUSG00000022842 | 0.156535    | 0.0251497    | 0.0167468   |
| 155 | 16  | 20643733 | 20643852 | Ece2     | ENSMUSG00000022842 | 0.133891    | 0.0361446    | 0.0247733   |
| 156 | 16  | 20707632 | 20707842 | Clcn2    | ENSMUSG00000022843 | 0.214373    | 0.146644     | 0.0288249   |
| 157 | 16  | 20709315 | 20709569 | Clcn2    | ENSMUSG00000022843 | 0.173834    | 0.0867793    | 0.0109322   |
| 158 | 16  | 20734586 | 20734685 | Chrd     | ENSMUSG00000006958 | 0.0239264   | 0.145215     | 0.00251995  |
| 159 | 16  | 43869097 | 43871620 | Qtrtd1   | ENSMUSG00000022704 | 0.0727249   | 0.206897     | 0.0422901   |
| 160 | 16  | 44370019 | 44370237 | Spice1   | ENSMUSG00000043065 | 0.218605    | 0.0318332    | 0.01774     |
| 161 | 16  | 44745493 | 44745998 | Gtpbp8   | ENSMUSG00000022668 | 0.117165    | 0.291242     | 0.00423777  |
| 162 | 16  | 5011692  | 5012240  | Rogdi    | ENSMUSG00000022540 | 0.142681    | 0.0971483    | 0.00764367  |
| 163 | 16  | 5198936  | 5199615  | Nagpa    | ENSMUSG00000023143 | 0.22523     | 0.0701312    | 0.0334782   |
| 164 | 17  | 17836744 | 17837508 | Spaca6   | ENSMUSG00000080316 | 0.381962    | 0.213899     | 0.0443193   |
| 165 | 17  | 17838243 | 17838315 | Spaca6   | ENSMUSG00000080316 | 0.792       | 0.338983     | 0.000513051 |
| 166 | 17  | 23735372 | 23735562 | Pkmyt1   | ENSMUSG00000023908 | 0.249289    | 0.541693     | 0.0407565   |
| 167 | 17  | 24206947 | 24207207 | Tbc1d24  | ENSMUSG00000036473 | 0.279496    | 0.484631     | 0.0386534   |
| 168 | 17  | 24207443 | 24207565 | Tbc1d24  | ENSMUSG00000036473 | 0.169032    | 0.333333     | 0.0196413   |
| 169 | 17  | 24499620 | 24500696 | Caskin1  | ENSMUSG00000033597 | 0.0680769   | 0.105053     | 0.0465506   |
| 170 | 17  | 24510075 | 24510248 | Traf7    | ENSMUSG00000052752 | 0.113301    | 0.222716     | 0.0014668   |
| 171 | 17  | 24529970 | 24530054 | Rab26    | ENSMUSG00000079657 | 0.111804    | 0.0509915    | 0.00733021  |
| 172 | 17  | 24530709 | 24530785 | Rab26    | ENSMUSG00000079657 | 0.11194     | 0.0500146    | 0.00572801  |
| 173 | 17  | 24680798 | 24680880 | Zfp598   | ENSMUSG00000041130 | 0.117117    | 0.0390461    | 0.0160265   |
| 174 | 17  | 24890460 | 24890567 | Spsb3    | ENSMUSG00000024160 | 0.190426    | 0.0634987    | 3.02708E-07 |
| 175 | 17  | 24890755 | 24890832 | Spsb3    | ENSMUSG00000024160 | 0.115624    | 0.071699     | 0.0137131   |
| 176 | 17  | 24890935 | 24891010 | Spsb3    | ENSMUSG00000024160 | 0.149454    | 0.0794913    | 0.0011871   |
| 177 | 17  | 24896758 | 24896851 | Nme3     | ENSMUSG00000073435 | 0.174012    | 0.0894245    | 0.00683699  |
| 178 | 17  | 25235111 | 25235181 | Gnptg    | ENSMUSG00000035521 | 0.166635    | 0.102804     | 0.00272232  |
| 179 | 17  | 25239842 | 25239913 | Gnptg    | ENSMUSG00000035521 | 0.400518    | 0.260628     | 0.00146771  |
| 180 | 17  | 25384614 | 25384694 | Cacna1h  | ENSMUSG00000024112 | 0.0294118   | 0.12         | 0.0244888   |
| 181 | 17  | 25784178 | 25784259 | Haghl    | ENSMUSG00000061046 | 0.128884    | 0.0719352    | 0.000425192 |
| 182 | 17  | 25791486 | 25791571 | Fam173a  | ENSMUSG00000057411 | 0.270111    | 0.193685     | 0.00959367  |
| 183 | 17  | 25827356 | 25827427 | Wdr24    | ENSMUSG00000025737 | 0.251222    | 0.143687     | 0.0246337   |
| 184 | 17  | 25827532 | 25827652 | Wdr24    | ENSMUSG00000025737 | 0.172083    | 0.0845443    | 0.0253368   |
| 185 | 17  | 25835056 | 25835136 | Rhbdl1   | ENSMUSG00000025735 | 0.271001    | 0.329807     | 0.0332649   |
| 186 | 17  | 25835893 | 25835968 | Rhbdl1   | ENSMUSG00000025735 | 0.0900859   | 0.137251     | 0.0127614   |
| 187 | 17  | 25840751 | 25840835 | Rhot2    | ENSMUSG00000025733 | 0.138024    | 0.0545079    | 5.77492E-06 |

| S/N | Chr | Start    | End      | Gene          | GeneID             | IR ratio 2w | IR ratio 22m | p-value     |
|-----|-----|----------|----------|---------------|--------------------|-------------|--------------|-------------|
| 188 | 17  | 25855234 | 25855300 | Wdr90         | ENSMUSG00000073434 | 0.64532     | 0.239437     | 0.0275292   |
| 189 | 17  | 25860817 | 25860906 | Wdr90         | ENSMUSG00000073434 | 0.4         | 0.676118     | 0.0402478   |
| 190 | 17  | 25876122 | 25876219 | Mettl26       | ENSMUSG00000025731 | 0.198856    | 0.0963257    | 0.00141035  |
| 191 | 17  | 26204927 | 26205107 | Rgs11         | ENSMUSG00000024186 | 0.0907571   | 0.2033       | 0.00932871  |
| 192 | 17  | 26934535 | 26934630 | Phf1          | ENSMUSG00000024193 | 0.143955    | 0.0689468    | 0.0348186   |
| 193 | 17  | 26935818 | 26935918 | Phf1          | ENSMUSG00000024193 | 0.135231    | 0.0455331    | 0.0254059   |
| 194 | 17  | 27113925 | 27114079 | Itpr3         | ENSMUSG00000042644 | 0.333333    | 0.0127971    | 0.0197754   |
| 195 | 17  | 27114505 | 27114846 | Itpr3         | ENSMUSG00000042644 | 1           | 0.0223371    | 0.00346021  |
| 196 | 17  | 27199438 | 27201636 | Lemd2         | ENSMUSG00000044857 | 0.143878    | 0.28422      | 0.0343915   |
| 197 | 17  | 28059391 | 28060561 | Anks1         | ENSMUSG00000024219 | 0.393189    | 0.232729     | 0.0170213   |
| 198 | 17  | 28599869 | 28600242 | Srpk1         | ENSMUSG00000004865 | 0.241767    | 0.163743     | 0.025876    |
| 199 | 17  | 28984200 | 28988177 | Stk38         | ENSMUSG00000024006 | 0.0894461   | 0.210083     | 0.0363033   |
| 200 | 17  | 32047731 | 32048552 | Rrp1b         | ENSMUSG00000058392 | 0.0546139   | 0.248824     | 0.0196616   |
| 201 | 17  | 33821914 | 33822005 | Kank3         | ENSMUSG00000042099 | 0.0289193   | 0.125        | 0.00473884  |
| 202 | 17  | 34024418 | 34024509 | Ring1         | ENSMUSG00000024325 | 0.102785    | 0.0120956    | 0.00375802  |
| 203 | 17  | 34026935 | 34027015 | H2-Ke6        | ENSMUSG00000073422 | 0.105354    | 0.179039     | 0.0268354   |
| 204 | 17  | 34183744 | 34184281 | Psmb9         | ENSMUSG00000096727 | 0.5         | 0.108199     | 0.0285273   |
| 205 | 17  | 34590563 | 34590741 | Gpsm3         | ENSMUSG00000034786 | 0.262473    | 0.0312595    | 0.0466521   |
| 206 | 17  | 34838683 | 34838812 | Dxo           | ENSMUSG00000040482 | 0.0230394   | 0.163796     | 0.000364139 |
| 207 | 17  | 34838907 | 34838986 | Dxo           | ENSMUSG00000040482 | 0.0649949   | 0.196143     | 0.00254366  |
| 208 | 17  | 34845912 | 34846026 | Skiv2l        | ENSMUSG00000040356 | 0.131665    | 0.0700148    | 0.0266344   |
| 209 | 17  | 34846173 | 34846521 | Skiv2l        | ENSMUSG00000040356 | 0.243657    | 0.138644     | 0.00566198  |
| 210 | 17  | 35004893 | 35004976 | Vars          | ENSMUSG00000007029 | 0.118222    | 0.0428816    | 0.0139219   |
| 211 | 17  | 35266726 | 35266865 | H2-D1         | ENSMUSG00000073411 | 0.123555    | 0.0852957    | 0.0478097   |
| 212 | 17  | 35660127 | 35660213 | Vars2         | ENSMUSG00000038838 | 0.00317965  | 0.110178     | 0.0026439   |
| 213 | 17  | 36257524 | 36257605 | Rpp21         | ENSMUSG00000024446 | 0.125966    | 0.0646733    | 0.0151634   |
| 214 | 17  | 37011517 | 37012062 | Mog           | ENSMUSG00000076439 | 0.133681    | 0.0426449    | 0.0158501   |
| 215 | 17  | 44082920 | 44085204 | Enpp5         | ENSMUSG00000023960 | 0.638339    | 0.535236     | 0.00691089  |
| 216 | 17  | 45540089 | 45541132 | Tcte1         | ENSMUSG00000023949 | 0.654886    | 0.0928595    | 0.00114849  |
| 217 | 17  | 57236740 | 57236870 | Gpr108        | ENSMUSG00000005823 | 0.147059    | 0.0570506    | 0.0356838   |
| 218 | 17  | 57237497 | 57237850 | Gpr108        | ENSMUSG00000005823 | 0.167986    | 0.079646     | 0.0341066   |
| 219 | 17  | 78919843 | 78919976 | Cebpz         | ENSMUSG00000062691 | 0.210672    | 0.312288     | 0.00652581  |
| 220 | 17  | 78920630 | 78920721 | Cebpz         | ENSMUSG00000024081 | 0.0634146   | 0.178423     | 0.00291118  |
| 221 | 18  | 31944205 | 31944435 | Lims2         | ENSMUSG00000024395 | 0.939037    | 0.543726     | 5.63941E-05 |
| 222 | 18  | 35660353 | 35660443 | Spata24       | ENSMUSG00000024352 | 0.146667    | 0.0503226    | 0.0436112   |
| 223 | 18  | 36677256 | 36677444 | Sra1          | ENSMUSG00000006050 | 0.196279    | 0.0972956    | 0.0219617   |
| 224 | 18  | 36762757 | 36762848 | Wdr55         | ENSMUSG00000042660 | 0.13        | 0.0316602    | 0.00989165  |
| 225 | 18  | 37958389 | 37958511 | Rell2         | ENSMUSG00000044024 | 0.114653    | 0.0624228    | 0.00010692  |
| 226 | 18  | 37958571 | 37958758 | Rell2         | ENSMUSG00000044024 | 0.116543    | 0.149104     | 0.0355918   |
| 227 | 18  | 37963037 | 37963127 | Fchsd1        | ENSMUSG00000038524 | 0.0068605   | 0.125        | 0.0224532   |
| 228 | 18  | 38258186 | 38258269 | O610009O20Rik | ENSMUSG00000024442 | 0.127989    | 0.0434783    | 0.0115629   |
| 229 | 18  | 67227719 | 67227803 | Mppe1         | ENSMUSG00000062526 | 0.00852619  | 0.145265     | 0.00396796  |
| 230 | 19  | 10215810 | 10216060 | Myrf          | ENSMUSG00000036098 | 0.127273    | 0.0395869    | 0.0473999   |
| 231 | 19  | 23975653 | 23977961 | Fam189a2      | ENSMUSG00000071604 | 0.245473    | 0.0947219    | 0.013631    |
| 232 | 19  | 36970038 | 36972897 | Btaf1         | ENSMUSG00000040565 | 0.00149333  | 0.698316     | 2.67467E-13 |
| 233 | 19  | 43665828 | 43666914 | Slc25a28      | ENSMUSG00000040414 | 0.459284    | 0.289126     | 0.00441674  |
| 234 | 19  | 45008375 | 45009279 | Twink         | ENSMUSG00000025209 | 0.0901787   | 0.224294     | 0.0271748   |
| 235 | 19  | 47129782 | 47129947 | Pdcd11        | ENSMUSG00000025047 | 0.0322581   | 0.122606     | 0.0367382   |

| S/N | Chr | Start     | End       | Gene          | GeneID             | IR ratio 2w | IR ratio 22m | p-value     |
|-----|-----|-----------|-----------|---------------|--------------------|-------------|--------------|-------------|
| 236 | 19  | 5049032   | 5049406   | Brms1         | ENSMUSG00000080268 | 0.0556805   | 0.118184     | 0.0439848   |
| 237 | 19  | 5083101   | 5085297   | Tmem151a      | ENSMUSG00000061451 | 0.0974928   | 0.140641     | 0.0104837   |
| 238 | 19  | 5495648   | 5495896   | Snx32         | ENSMUSG00000056185 | 0.0800645   | 0.165299     | 4.98036E-05 |
| 239 | 19  | 5495982   | 5496057   | Snx32         | ENSMUSG00000056185 | 0.10255     | 0.0356397    | 6.79553E-05 |
| 240 | 19  | 5661111   | 5661595   | Sipa1         | ENSMUSG00000056917 | 0.0640394   | 0.291309     | 0.0452675   |
| 241 | 19  | 5665247   | 5665328   | Pcnx3         | ENSMUSG00000054874 | 0.171429    | 0.063354     | 0.0126564   |
| 242 | 19  | 5903772   | 5904239   | Dpf2          | ENSMUSG00000024826 | 0.114943    | 0.0602332    | 0.0236006   |
| 243 | 19  | 6052479   | 6052547   | Syvn1         | ENSMUSG00000024807 | 0.108312    | 0.0361871    | 0.00950683  |
| 244 | 19  | 6063446   | 6063526   | Tm7sf2        | ENSMUSG00000024799 | 0.0629556   | 0.138103     | 0.0236773   |
| 245 | 19  | 6063607   | 6063821   | Tm7sf2        | ENSMUSG00000024799 | 0.0865611   | 0.161869     | 0.0248951   |
| 246 | 19  | 6063990   | 6064078   | Tm7sf2        | ENSMUSG00000024799 | 0.0588235   | 0.172414     | 0.00223608  |
| 247 | 19  | 61226654  | 61226805  | Csf2ra        | ENSMUSG00000059326 | 0.234629    | 0.624506     | 0.00460643  |
| 248 | 19  | 6954299   | 6954380   | Plcb3         | ENSMUSG00000024960 | 0.100443    | 0.0178739    | 0.0167862   |
| 249 | 19  | 8748711   | 8748806   | Stx5a         | ENSMUSG00000010110 | 0.0885841   | 0.151845     | 0.0228501   |
| 250 | 19  | 8936459   | 8936618   | Eml3          | ENSMUSG00000071647 | 0.828812    | 0.480114     | 0.0287457   |
| 251 | 2   | 104664163 | 104664296 | Cstf3         | ENSMUSG00000027176 | 0.0925926   | 0.222608     | 0.00748372  |
| 252 | 2   | 112640673 | 112641010 | Ryr3          | ENSMUSG00000057378 | 0.134497    | 0.368089     | 0.0300732   |
| 253 | 2   | 112667896 | 112668044 | Ryr3          | ENSMUSG00000057378 | 0.0160428   | 0.284672     | 0.0171794   |
| 254 | 2   | 118759256 | 118759507 | A430105119Rik | ENSMUSG00000045838 | 0.388013    | 0.00910426   | 0.0123457   |
| 255 | 2   | 118869782 | 118871377 | Ivd           | ENSMUSG00000027332 | 0.0700607   | 0.141898     | 0.0258204   |
| 256 | 2   | 118871547 | 118872884 | Ivd           | ENSMUSG00000027332 | 0.058413    | 0.12832      | 0.0210216   |
| 257 | 2   | 119752156 | 119752230 | Ltk           | ENSMUSG00000027297 | 0.514472    | 0.291805     | 0.00372799  |
| 258 | 2   | 120030542 | 120030815 | Gm28042       | ENSMUSG00000033852 | 0.0125156   | 0.125        | 0.0390184   |
| 259 | 2   | 120031651 | 120031840 | Jmjd7         | ENSMUSG00000098789 | 0.0411559   | 0.333942     | 0.0060636   |
| 260 | 2   | 120494941 | 120495235 | Capn3         | ENSMUSG00000079110 | 0.474654    | 0.0181951    | 0.00228366  |
| 261 | 2   | 120723017 | 120723191 | Cdan1         | ENSMUSG00000027284 | 0.486381    | 0.229469     | 0.0102928   |
| 262 | 2   | 127248084 | 127248491 | Tmem127       | ENSMUSG00000034850 | 0.273508    | 0.369305     | 0.0357375   |
| 263 | 2   | 129206486 | 129207609 | Slc20a1       | ENSMUSG00000027397 | 0.14735     | 0.0993598    | 0.0253303   |
| 264 | 2   | 131040475 | 131041015 | Gfra4         | ENSMUSG00000027316 | 0.25774     | 0.36078      | 0.00924879  |
| 265 | 2   | 14045255  | 14055730  | Hacd1         | ENSMUSG00000063275 | 0.0156996   | 0.108595     | 0.00821052  |
| 266 | 2   | 151632254 | 151632455 | Snph          | ENSMUSG00000027457 | 0.67089     | 0.49498      | 0.000395662 |
| 267 | 2   | 155578428 | 155578711 | Gss           | ENSMUSG00000027610 | 0.0181956   | 0.125801     | 0.00469005  |
| 268 | 2   | 155629680 | 155630257 | Myh7b         | ENSMUSG00000074652 | 0.0208462   | 0.363806     | 0.0100788   |
| 269 | 2   | 155630384 | 155630474 | Myh7b         | ENSMUSG00000074652 | 0.0349819   | 0.37094      | 0.0276413   |
| 270 | 2   | 155632752 | 155632847 | Myh7b         | ENSMUSG00000074652 | 0.1         | 0.0196488    | 0.0389531   |
| 271 | 2   | 160761648 | 160761738 | Plcg1         | ENSMUSG00000016933 | 0.134144    | 0.263111     | 0.000242421 |
| 272 | 2   | 162967085 | 162967251 | L3mbtl1       | ENSMUSG00000035576 | 0.138155    | 0.292944     | 0.0444874   |
| 273 | 2   | 163454228 | 163454324 | Gdap1l1       | ENSMUSG00000017943 | 0.242343    | 0.312449     | 0.0483635   |
| 274 | 2   | 164795179 | 164795651 | Acot8         | ENSMUSG00000017307 | 0.16523     | 0.346519     | 0.00800928  |
| 275 | 2   | 164892606 | 164892686 | Zfp335        | ENSMUSG00000039834 | 0.297211    | 0.399818     | 0.040021    |
| 276 | 2   | 164892952 | 164893245 | Zfp335        | ENSMUSG00000039834 | 0.246949    | 0.396325     | 0.00459987  |
| 277 | 2   | 164893615 | 164893700 | Zfp335        | ENSMUSG00000039834 | 0.241489    | 0.395366     | 0.00350002  |
| 278 | 2   | 180582955 | 180583400 | Mrgbp         | ENSMUSG00000027569 | 0.141995    | 0.0460653    | 0.0210177   |
| 279 | 2   | 181230920 | 181231007 | Helz2         | ENSMUSG00000027580 | 1           | 0.0555556    | 0.0037      |
| 280 | 2   | 181355552 | 181355650 | Rtel1         | ENSMUSG00000038685 | 0.0555556   | 0.211268     | 0.0327148   |
| 281 | 2   | 181382703 | 181382798 | Lime1         | ENSMUSG00000090077 | 0.245491    | 0.154897     | 0.0476501   |
| 282 | 2   | 181597343 | 181597427 | Samd10        | ENSMUSG00000038605 | 0.145647    | 0.0290864    | 0.00395617  |
| 283 | 2   | 181686974 | 181687613 | Tcea2         | ENSMUSG00000059540 | 0.0575221   | 0.103509     | 0.0220924   |

| S/N | Chr | Start     | End       | Gene          | GeneID             | IR ratio 2w | IR ratio 22m | p-value     |
|-----|-----|-----------|-----------|---------------|--------------------|-------------|--------------|-------------|
| 284 | 2   | 20808024  | 20808709  | Etl4          | ENSMUSG00000036617 | 0.126541    | 0.278534     | 9.65723E-06 |
| 285 | 2   | 22935639  | 22939822  | Pdss1         | ENSMUSG00000026784 | 0.031469    | 0.135824     | 0.0440421   |
| 286 | 2   | 25272128  | 25272297  | Ssna1         | ENSMUSG00000026966 | 0.23136     | 0.168061     | 0.0164035   |
| 287 | 2   | 25353217  | 25353359  | Dpp7          | ENSMUSG00000026958 | 0.469809    | 0.308542     | 0.0465288   |
| 288 | 2   | 25354822  | 25354892  | Dpp7          | ENSMUSG00000026958 | 0.341865    | 0.116883     | 0.00351877  |
| 289 | 2   | 25460074  | 25460166  | BC029214      | ENSMUSG00000047617 | 0.327083    | 0.23708      | 0.0234506   |
| 290 | 2   | 25909306  | 25909593  | Kcnt1         | ENSMUSG00000058740 | 0.192787    | 0.125185     | 0.0201156   |
| 291 | 2   | 26591728  | 26592117  | Egfl7         | ENSMUSG00000026921 | 0.192698    | 0.128562     | 0.0320964   |
| 292 | 2   | 26958567  | 26960223  | Rexo4         | ENSMUSG00000052406 | 0.061109    | 0.112757     | 0.0359658   |
| 293 | 2   | 29923639  | 29925939  | Odf2          | ENSMUSG00000026790 | 0.292921    | 0.416712     | 0.0415071   |
| 294 | 2   | 30177721  | 30177919  | Spout1        | ENSMUSG00000039660 | 0.498822    | 0.37059      | 0.0292184   |
| 295 | 2   | 30347104  | 30348554  | Sh3glb2       | ENSMUSG00000026860 | 0.144545    | 0.106167     | 0.0044211   |
| 296 | 2   | 30348617  | 30349225  | Sh3glb2       | ENSMUSG00000026860 | 0.150472    | 0.112079     | 0.0139645   |
| 297 | 2   | 32377362  | 32377508  | Ciz1          | ENSMUSG00000039205 | 0.145863    | 0.227017     | 0.0235147   |
| 298 | 2   | 32377630  | 32377963  | Ciz1          | ENSMUSG00000039205 | 0.131824    | 0.224872     | 0.00709611  |
| 299 | 2   | 32571295  | 32572296  | Dpm2          | ENSMUSG00000026810 | 0.0467979   | 0.110565     | 0.00015591  |
| 300 | 2   | 5866241   | 5866353   | Nudt5         | ENSMUSG00000025817 | 0.139       | 0.0568032    | 0.0411308   |
| 301 | 2   | 5893221   | 5895256   | Sec61a2       | ENSMUSG00000025816 | 0.0398986   | 0.132855     | 0.0107525   |
| 302 | 2   | 84737107  | 84737419  | Ypel4         | ENSMUSG00000034059 | 0.265293    | 0.178343     | 0.0433392   |
| 303 | 2   | 84769910  | 84770092  | Serping1      | ENSMUSG00000023224 | 0.230769    | 0.0227273    | 0.0128847   |
| 304 | 2   | 91278957  | 91279189  | 1110051M20Rik | ENSMUSG00000040591 | 0.0773647   | 0.113536     | 0.0333368   |
| 305 | 3   | 10346026  | 10346109  | Zfand1        | ENSMUSG00000039795 | 0.112296    | 0.0366331    | 0.0114786   |
| 306 | 3   | 108075359 | 108075530 | Ampd2         | ENSMUSG00000027889 | 0.137764    | 0.0832229    | 0.0398802   |
| 307 | 3   | 116006935 | 116007134 | Slc30a7       | ENSMUSG00000054414 | 0.00139043  | 0.110469     | 0.0272492   |
| 308 | 3   | 133005432 | 133005559 | Gstcd         | ENSMUSG00000028018 | 0.20339     | 0.00566572   | 0.03125     |
| 309 | 3   | 135329098 | 135329767 | Slc9b2        | ENSMUSG00000037994 | 0.0164179   | 0.228904     | 0.0291306   |
| 310 | 3   | 135329917 | 135330582 | Slc9b2        | ENSMUSG00000037994 | 0.017149    | 0.230432     | 0.0431513   |
| 311 | 3   | 158022950 | 158026724 | Srsf11        | ENSMUSG00000055436 | 0.19528     | 0.287866     | 0.010319    |
| 312 | 3   | 28665839  | 28666088  | Tnik          | ENSMUSG00000027692 | 0.120048    | 0.205844     | 0.00593307  |
| 313 | 3   | 28666228  | 28667898  | Tnik          | ENSMUSG00000027692 | 0.213258    | 0.365468     | 0.00206115  |
| 314 | 3   | 33813200  | 33814189  | Ccdc39        | ENSMUSG00000027676 | 0.252577    | 0.461451     | 0.0134036   |
| 315 | 3   | 33814529  | 33814654  | Ccdc39        | ENSMUSG00000027676 | 0.485895    | 0.709653     | 0.0362019   |
| 316 | 3   | 33814795  | 33815411  | Ccdc39        | ENSMUSG00000027676 | 0.160099    | 0.447837     | 0.00496076  |
| 317 | 3   | 33815518  | 33815911  | Ccdc39        | ENSMUSG00000027676 | 0.13175     | 0.324222     | 0.01512     |
| 318 | 3   | 53473567  | 53474687  | Proser1       | ENSMUSG00000049504 | 0.0341748   | 0.120665     | 0.0321988   |
| 319 | 3   | 80688714  | 80689102  | Gria2         | ENSMUSG00000033981 | 0.254224    | 0.199949     | 0.000379335 |
| 320 | 3   | 87997356  | 87997744  | Bcan          | ENSMUSG00000004892 | 0.140156    | 0.230083     | 0.00010266  |
| 321 | 3   | 88023640  | 88023764  | Hapln2        | ENSMUSG00000004894 | 1           | 0.210944     | 0.0103338   |
| 322 | 3   | 88633042  | 88633257  | Arhgef2       | ENSMUSG00000028059 | 0.171433    | 0.118479     | 0.0329789   |
| 323 | 3   | 89151080  | 89151424  | Hcn3          | ENSMUSG00000028051 | 0.172505    | 0.337429     | 0.0133317   |
| 324 | 3   | 89210183  | 89210265  | Mtx1          | ENSMUSG00000064068 | 0.172066    | 0.27444      | 0.00598049  |
| 325 | 3   | 89219995  | 89220151  | Thbs3         | ENSMUSG00000028047 | 0.00567537  | 0.244094     | 0.00518126  |
| 326 | 3   | 89340472  | 89340862  | Adam15        | ENSMUSG00000028041 | 0.100548    | 0.0482119    | 0.00802517  |
| 327 | 3   | 89343583  | 89343672  | Adam15        | ENSMUSG00000028041 | 0.309963    | 0.175274     | 0.000919492 |
| 328 | 3   | 90259492  | 90259582  | Crtc2         | ENSMUSG00000027936 | 0.151096    | 0.030575     | 0.00334467  |
| 329 | 3   | 94488279  | 94488526  | Celf3         | ENSMUSG00000028137 | 0.159408    | 0.204769     | 0.0159998   |
| 330 | 3   | 94955385  | 94955745  | Rfx5          | ENSMUSG00000005774 | 0.304369    | 0.134062     | 0.0327039   |
| 331 | 3   | 95167476  | 95167623  | Sema6c        | ENSMUSG00000038777 | 0.065534    | 0.153846     | 0.0289183   |

| S/N | Chr | Start     | End       | Gene          | GeneID             | IR ratio 2w | IR ratio 22m | p-value     |
|-----|-----|-----------|-----------|---------------|--------------------|-------------|--------------|-------------|
| 332 | 3   | 95321060  | 95321189  | Cers2         | ENSMUSG00000015714 | 0.116279    | 0.0426735    | 0.0113633   |
| 333 | 3   | 95884237  | 95884969  | BC028528      | ENSMUSG00000038543 | 0.0646473   | 0.26379      | 0.0207419   |
| 334 | 4   | 108620073 | 108621511 | Cc2d1b        | ENSMUSG00000028582 | 0.215399    | 0.0815466    | 0.0468838   |
| 335 | 4   | 109066999 | 109068362 | Osbpl9        | ENSMUSG00000028559 | 0.0435194   | 0.110112     | 0.040748    |
| 336 | 4   | 117002322 | 117002509 | Hectd3        | ENSMUSG00000046861 | 0.0557019   | 0.117716     | 0.0181433   |
| 337 | 4   | 117889931 | 117890017 | Dph2          | ENSMUSG00000028540 | 0.00731452  | 0.106977     | 0.0129407   |
| 338 | 4   | 118372247 | 118372329 | Szt2          | ENSMUSG00000033253 | 0.142857    | 0.0172414    | 0.0116653   |
| 339 | 4   | 118373555 | 118373743 | Szt2          | ENSMUSG00000033253 | 0.335385    | 0.174556     | 0.0399015   |
| 340 | 4   | 118376127 | 118376332 | Szt2          | ENSMUSG00000033253 | 0.0196834   | 0.107274     | 0.0209153   |
| 341 | 4   | 119232469 | 119232582 | AU022252      | ENSMUSG00000078584 | 0.418482    | 0.666851     | 0.0430626   |
| 342 | 4   | 121049715 | 121050075 | Col9a2        | ENSMUSG00000028626 | 0.0911452   | 0.234609     | 0.0485029   |
| 343 | 4   | 121050129 | 121050354 | Col9a2        | ENSMUSG00000028626 | 0.038674    | 0.181818     | 0.0398646   |
| 344 | 4   | 126034339 | 126034421 | Csf3r         | ENSMUSG00000028859 | 1           | 0.153846     | 0.00332381  |
| 345 | 4   | 126317904 | 126317983 | Adprhl2       | ENSMUSG00000042558 | 0.22043     | 0.112245     | 0.0137377   |
| 346 | 4   | 127027518 | 127029826 | Sfpq          | ENSMUSG00000028820 | 0.117922    | 0.183996     | 0.00251136  |
| 347 | 4   | 129620876 | 129620983 | Ccdc28b       | ENSMUSG00000028795 | 0.015748    | 0.102091     | 1.6851E-06  |
| 348 | 4   | 129621150 | 129622599 | Ccdc28b       | ENSMUSG00000028795 | 0.0434838   | 0.143134     | 0.00011389  |
| 349 | 4   | 136995712 | 136996024 | Zbtb40        | ENSMUSG00000060862 | 0.166667    | 0.0171598    | 0.043965    |
| 350 | 4   | 141010721 | 141012825 | Mfap2         | ENSMUSG00000060572 | 0.00907402  | 0.139729     | 0.04        |
| 351 | 4   | 141013859 | 141014055 | Mfap2         | ENSMUSG00000060572 | 0.0157508   | 0.151982     | 0.00472389  |
| 352 | 4   | 141019312 | 141019707 | Crocc         | ENSMUSG00000040860 | 0.21875     | 0.128681     | 0.0298578   |
| 353 | 4   | 141465842 | 141465976 | Zbtb17        | ENSMUSG00000006215 | 0.105071    | 0.0481013    | 0.0339766   |
| 354 | 4   | 154961049 | 154961135 | Hes5          | ENSMUSG00000048001 | 0.119928    | 0.222703     | 0.0234928   |
| 355 | 4   | 154961301 | 154961391 | Hes5          | ENSMUSG00000048001 | 0.18239     | 0.0886076    | 0.0328291   |
| 356 | 4   | 155429298 | 155429874 | Cfap74        | ENSMUSG00000078490 | 1           | 0.265629     | 0.0222277   |
| 357 | 4   | 155855025 | 155855103 | Dvl1          | ENSMUSG00000029071 | 0.10324     | 0.0565659    | 0.0158948   |
| 358 | 4   | 155887521 | 155887604 | Cpsf3l        | ENSMUSG00000029034 | 0.0527199   | 0.122708     | 0.0166757   |
| 359 | 4   | 155887767 | 155887854 | Cpsf3l        | ENSMUSG00000029034 | 0.0990099   | 0.16491      | 0.0427607   |
| 360 | 4   | 155890902 | 155891051 | Pusl1         | ENSMUSG00000051557 | 0.0797634   | 0.196349     | 0.0026417   |
| 361 | 4   | 156124001 | 156124091 | 9430015G10Rik | ENSMUSG00000059939 | 0.666667    | 0.370548     | 0.0234949   |
| 362 | 4   | 156173130 | 156173542 | Agrn          | ENSMUSG00000041936 | 0.198262    | 0.267638     | 0.0307628   |
| 363 | 4   | 21874672  | 21874912  | Pnlsr         | ENSMUSG00000028248 | 0.385564    | 0.249882     | 0.00583748  |
| 364 | 4   | 34572572  | 34575031  | Orc3          | ENSMUSG00000040044 | 0.108812    | 0.180451     | 0.0398372   |
| 365 | 4   | 41758238  | 41758502  | Galt          | ENSMUSG00000036073 | 0.103015    | 0.148696     | 0.0184732   |
| 366 | 4   | 43426365  | 43426447  | Rusc2         | ENSMUSG00000035969 | 0.280069    | 0.220183     | 0.0343195   |
| 367 | 4   | 43567467  | 43567724  | Gba2          | ENSMUSG00000028467 | 0.10344     | 0.160145     | 0.0274891   |
| 368 | 4   | 43570190  | 43570345  | Gba2          | ENSMUSG00000028467 | 0.112558    | 0.221371     | 0.00029159  |
| 369 | 4   | 49632211  | 49632364  | Rnf20         | ENSMUSG00000028309 | 0.65878     | 0.361279     | 0.000364546 |
| 370 | 4   | 56812388  | 56812510  | Ctnnal1       | ENSMUSG00000038816 | 0.144981    | 0.00789177   | 0.019073    |
| 371 | 5   | 100768455 | 100770397 | Helq          | ENSMUSG00000035266 | 0.152392    | 0.415189     | 0.038364    |
| 372 | 5   | 106636323 | 106636416 | Zfp644        | ENSMUSG00000049606 | 0.623386    | 0.406931     | 0.00161222  |
| 373 | 5   | 108638490 | 108638666 | Tmem175       | ENSMUSG00000013495 | 0.0406742   | 0.102728     | 0.024391    |
| 374 | 5   | 108649925 | 108650200 | Dgkq          | ENSMUSG00000004815 | 0.300164    | 0.142496     | 0.00730554  |
| 375 | 5   | 110104168 | 110104267 | Gtpbp6        | ENSMUSG00000033434 | 0.0832274   | 0.407853     | 9.49866E-13 |
| 376 | 5   | 110104420 | 110104509 | Gtpbp6        | ENSMUSG00000033434 | 0.125828    | 0.201777     | 0.00746241  |
| 377 | 5   | 110104658 | 110104889 | Gtpbp6        | ENSMUSG00000033434 | 0.0960578   | 0.249788     | 8.05427E-09 |
| 378 | 5   | 110105098 | 110105198 | Gtpbp6        | ENSMUSG00000033434 | 0.101284    | 0.308086     | 2.1479E-09  |
| 379 | 5   | 110106783 | 110106869 | Gtpbp6        | ENSMUSG00000033434 | 0.813387    | 0.625924     | 0.0125302   |

| S/N | Chr | Start     | End       | Gene    | GeneID             | IR ratio 2w | IR ratio 22m | p-value     |
|-----|-----|-----------|-----------|---------|--------------------|-------------|--------------|-------------|
| 380 | 5   | 110151686 | 110152335 | Chfr    | ENSMUSG00000014668 | 0.047183    | 0.132915     | 0.00615468  |
| 381 | 5   | 110152490 | 110153117 | Chfr    | ENSMUSG00000014668 | 0.0737293   | 0.20389      | 0.000631924 |
| 382 | 5   | 110162781 | 110164005 | Chfr    | ENSMUSG00000014668 | 0.0949454   | 0.26419      | 0.0011907   |
| 383 | 5   | 117092856 | 117092945 | Suds3   | ENSMUSG00000066900 | 0.882185    | 0.760802     | 0.0255628   |
| 384 | 5   | 117382860 | 117383394 | Rfc5    | ENSMUSG00000029363 | 0.0443686   | 0.167768     | 0.00862138  |
| 385 | 5   | 117384604 | 117385387 | Rfc5    | ENSMUSG00000029363 | 0.0432049   | 0.170093     | 0.0053557   |
| 386 | 5   | 117387933 | 117388916 | Rfc5    | ENSMUSG00000029363 | 0.0270607   | 0.221309     | 0.0037908   |
| 387 | 5   | 118056438 | 118056536 | Tesc    | ENSMUSG00000029359 | 0.349206    | 0.230409     | 0.00152597  |
| 388 | 5   | 121850546 | 121851167 | Fam109a | ENSMUSG00000044134 | 0.0458358   | 0.134517     | 0.04913     |
| 389 | 5   | 123523381 | 123524070 | Diablo  | ENSMUSG00000029433 | 0.280537    | 0.442132     | 0.0295748   |
| 390 | 5   | 124000774 | 124000991 | Hip1r   | ENSMUSG00000000915 | 0.120585    | 0.0529407    | 0.00332755  |
| 391 | 5   | 124114192 | 124114387 | Ogfod2  | ENSMUSG00000023707 | 0.106492    | 0.170507     | 0.0439598   |
| 392 | 5   | 124114645 | 124114714 | Ogfod2  | ENSMUSG00000023707 | 0.098689    | 0.171429     | 0.0265047   |
| 393 | 5   | 137313708 | 137313959 | Trip6   | ENSMUSG00000023348 | 0.691574    | 0.238469     | 0.0243083   |
| 394 | 5   | 137518612 | 137518877 | Gigyf1  | ENSMUSG00000029714 | 0.423661    | 0.256037     | 0.0413677   |
| 395 | 5   | 137520800 | 137520884 | Gigyf1  | ENSMUSG00000029714 | 0.413203    | 0.107632     | 0.00119788  |
| 396 | 5   | 138166078 | 138166682 | Mcm7    | ENSMUSG00000029730 | 0.0587011   | 0.205882     | 0.031464    |
| 397 | 5   | 138167439 | 138167550 | Mcm7    | ENSMUSG00000029730 | 0.00605602  | 0.127295     | 0.00597424  |
| 398 | 5   | 138167634 | 138167840 | Mcm7    | ENSMUSG00000029730 | 0.0860873   | 0.213603     | 0.0375644   |
| 399 | 5   | 138168482 | 138168809 | Mcm7    | ENSMUSG00000029730 | 0.047619    | 0.168262     | 0.0487721   |
| 400 | 5   | 138169473 | 138169559 | Mcm7    | ENSMUSG00000029730 | 0.052094    | 0.199148     | 0.0089173   |
| 401 | 5   | 139338375 | 139342562 | Cox19   | ENSMUSG00000045438 | 0.0457663   | 0.117476     | 0.00291322  |
| 402 | 5   | 21270614  | 21271216  | Gsap    | ENSMUSG00000039934 | 0.541867    | 0.179074     | 0.0265943   |
| 403 | 5   | 24439398  | 24439736  | Slc4a2  | ENSMUSG00000028962 | 0.0672599   | 0.223529     | 0.0137646   |
| 404 | 5   | 24441261  | 24441335  | Fastk   | ENSMUSG00000028959 | 0.121038    | 0.0517276    | 0.0014495   |
| 405 | 5   | 24592804  | 24593016  | Smarcd3 | ENSMUSG00000028949 | 0.0945964   | 0.136067     | 0.018852    |
| 406 | 5   | 24593118  | 24593224  | Smarcd3 | ENSMUSG00000028949 | 0.0715394   | 0.101451     | 0.0262335   |
| 407 | 5   | 29224284  | 29225042  | Rnf32   | ENSMUSG00000029130 | 0.00667576  | 0.124901     | 0.015625    |
| 408 | 5   | 30930636  | 30930715  | Khk     | ENSMUSG00000029162 | 0.25        | 0.0445476    | 0.00177752  |
| 409 | 5   | 37311742  | 37313428  | Evc     | ENSMUSG00000029122 | 0.0339994   | 0.381142     | 0.0363284   |
| 410 | 5   | 45532835  | 45534152  | Fam184b | ENSMUSG00000015879 | 0.0268319   | 0.203932     | 0.00912662  |
| 411 | 5   | 73639514  | 73639788  | Sgcb    | ENSMUSG00000029156 | 0.0510555   | 0.142939     | 1.46275E-05 |
| 412 | 5   | 74597410  | 74597775  | Lnx1    | ENSMUSG00000029228 | 0.359438    | 0.494787     | 0.00314611  |
| 413 | 5   | 77095022  | 77095150  | Hopx    | ENSMUSG00000059325 | 0.110395    | 0.0627127    | 0.0495521   |
| 414 | 6   | 106779041 | 106779185 | Trnt1   | ENSMUSG00000013736 | 0.290684    | 0.409149     | 0.00467858  |
| 415 | 6   | 113283242 | 113283349 | Cpne9   | ENSMUSG00000030270 | 0.408701    | 0.265811     | 0.019676    |
| 416 | 6   | 113321865 | 113321967 | Brpf1   | ENSMUSG00000001632 | 0.32635     | 0.157661     | 0.0159676   |
| 417 | 6   | 113482378 | 113482496 | Il17rc  | ENSMUSG00000030281 | 1           | 0.169811     | 0.0104064   |
| 418 | 6   | 115619916 | 115620208 | Raf1    | ENSMUSG00000000441 | 0.0612331   | 0.124054     | 0.00242238  |
| 419 | 6   | 120518537 | 120521193 | Cecr5   | ENSMUSG00000058979 | 0.139468    | 0.258945     | 0.0297146   |
| 420 | 6   | 125047587 | 125047792 | Ing4    | ENSMUSG00000030330 | 0.0608998   | 0.138787     | 0.00253939  |
| 421 | 6   | 134922083 | 134924242 | Cdkn1b  | ENSMUSG00000003031 | 0.250856    | 0.383518     | 0.0148802   |
| 422 | 6   | 142353598 | 142354624 | Pyroxd1 | ENSMUSG00000041671 | 0.0222596   | 0.122172     | 0.0136252   |
| 423 | 6   | 30742220  | 30742527  | Mest    | ENSMUSG00000051855 | 0.0417715   | 0.192142     | 1.06138E-06 |
| 424 | 6   | 30742605  | 30742715  | Mest    | ENSMUSG00000051855 | 0.0437436   | 0.204695     | 1.70273E-06 |
| 425 | 6   | 30742852  | 30743013  | Mest    | ENSMUSG00000051855 | 0.0149825   | 0.215848     | 3.93117E-10 |
| 426 | 6   | 30743072  | 30744353  | Mest    | ENSMUSG00000051855 | 0.0159155   | 0.164431     | 7.39671E-09 |
| 427 | 6   | 30744932  | 30745081  | Mest    | ENSMUSG00000051855 | 0.056582    | 0.220596     | 2.42081E-08 |

| S/N | Chr | Start     | End       | Gene          | GeneID             | IR ratio 2w | IR ratio 22m | p-value     |
|-----|-----|-----------|-----------|---------------|--------------------|-------------|--------------|-------------|
| 428 | 6   | 30745183  | 30745829  | Mest          | ENSMUSG00000051855 | 0.0380606   | 0.22873      | 3.84936E-08 |
| 429 | 6   | 30745906  | 30746261  | Mest          | ENSMUSG00000051855 | 0.0448853   | 0.234043     | 1.28222E-05 |
| 430 | 6   | 30746325  | 30747051  | Mest          | ENSMUSG00000051855 | 0.0725477   | 0.26228      | 1.38304E-06 |
| 431 | 6   | 30748987  | 30749405  | Copg2         | ENSMUSG00000025607 | 0.192642    | 0.116349     | 0.00301435  |
| 432 | 6   | 30749899  | 30750537  | Copg2         | ENSMUSG00000025607 | 0.299038    | 0.216316     | 0.0193629   |
| 433 | 6   | 59209181  | 59209338  | Tigd2         | ENSMUSG00000049232 | 0.151079    | 0.0170684    | 0.0393983   |
| 434 | 6   | 71596892  | 71597216  | Kdm3a         | ENSMUSG00000053470 | 0.133237    | 0.0563107    | 0.0428366   |
| 435 | 6   | 83054832  | 83054910  | Aup1          | ENSMUSG00000068328 | 0.150496    | 0.0854083    | 0.0166557   |
| 436 | 6   | 83079745  | 83079921  | Pcgf1         | ENSMUSG00000069678 | 0.0392465   | 0.126362     | 0.0393647   |
| 437 | 6   | 83103532  | 83103611  | Ccdc142       | ENSMUSG00000107499 | 0.289796    | 0.0205047    | 0.0131306   |
| 438 | 6   | 86420411  | 86424344  | Tia1          | ENSMUSG00000071337 | 0.0848557   | 0.2044       | 0.00134965  |
| 439 | 6   | 91254621  | 91256234  | Fbln2         | ENSMUSG00000064080 | 0.0211285   | 0.34787      | 0.03078     |
| 440 | 6   | 91266084  | 91266314  | Fbln2         | ENSMUSG00000064080 | 0.0145577   | 0.215287     | 0.0144583   |
| 441 | 7   | 101823646 | 101823892 | Inpp1         | ENSMUSG00000032737 | 0.165775    | 0.0599078    | 0.0480665   |
| 442 | 7   | 105740342 | 105740512 | Ilk           | ENSMUSG00000030890 | 0.0801105   | 0.119088     | 0.0188204   |
| 443 | 7   | 105740608 | 105740770 | Ilk           | ENSMUSG00000030890 | 0.0730947   | 0.106825     | 0.0294656   |
| 444 | 7   | 105740867 | 105740959 | Ilk           | ENSMUSG00000030890 | 0.0608129   | 0.111253     | 0.00249298  |
| 445 | 7   | 105741043 | 105741147 | Ilk           | ENSMUSG00000030890 | 0.0670615   | 0.107844     | 0.012599    |
| 446 | 7   | 105741233 | 105741373 | Ilk           | ENSMUSG00000030890 | 0.0805637   | 0.12679      | 0.00899933  |
| 447 | 7   | 109027115 | 109027752 | Tub           | ENSMUSG00000031028 | 0.0897246   | 0.135178     | 0.0227102   |
| 448 | 7   | 118156735 | 118156859 | Smg1          | ENSMUSG00000030655 | 0.219163    | 0.124943     | 0.037447    |
| 449 | 7   | 126372567 | 126372744 | Spns1         | ENSMUSG00000030741 | 0.085499    | 0.14635      | 0.0194711   |
| 450 | 7   | 126575258 | 126575343 | Cln3          | ENSMUSG00000030720 | 0.205882    | 0.0578609    | 0.0127406   |
| 451 | 7   | 127016282 | 127016442 | Gm42742       | ENSMUSG00000107068 | 0.100793    | 0.0572669    | 0.0281832   |
| 452 | 7   | 127375502 | 127375642 | Zfp747        | ENSMUSG00000054381 | 0.333333    | 0.037037     | 0.0123046   |
| 453 | 7   | 139920825 | 139920901 | Kndc1         | ENSMUSG00000066129 | 0.114236    | 0.0351617    | 0.00693523  |
| 454 | 7   | 140101188 | 140101331 | Fuom          | ENSMUSG00000025466 | 0.0471849   | 0.145992     | 0.00180495  |
| 455 | 7   | 141071114 | 141071207 | B4galnt4      | ENSMUSG00000055629 | 0.119788    | 0.170032     | 0.0370146   |
| 456 | 7   | 141464842 | 141464938 | Cracr2b       | ENSMUSG00000048200 | 0.43083     | 0.142857     | 0.0409362   |
| 457 | 7   | 141491905 | 141491979 | Tspan4        | ENSMUSG00000025511 | 0.0473557   | 0.121622     | 0.0134277   |
| 458 | 7   | 16892356  | 16892449  | Gng8          | ENSMUSG00000063594 | 0.666667    | 0.0769231    | 0.013884    |
| 459 | 7   | 19811408  | 19811494  | Bcl3          | ENSMUSG00000053175 | 1           | 0.0909091    | 0.0128847   |
| 460 | 7   | 24912155  | 24912309  | Arhgef1       | ENSMUSG00000040940 | 0.0729108   | 0.180489     | 0.00887352  |
| 461 | 7   | 27580691  | 27581350  | 2310022A10Rik | ENSMUSG00000049643 | 0.323262    | 0.488201     | 0.01941     |
| 462 | 7   | 28288196  | 28288300  | Selenov       | ENSMUSG00000046750 | 0.634615    | 0.181818     | 0.0399248   |
| 463 | 7   | 28401617  | 28401823  | Samd4b        | ENSMUSG00000109336 | 0.221053    | 0.372933     | 0.00297217  |
| 464 | 7   | 28815352  | 28818460  | Hnrnpl        | ENSMUSG00000015165 | 0.123554    | 0.174008     | 0.00523262  |
| 465 | 7   | 30526500  | 30527141  | Arhgap33      | ENSMUSG00000036882 | 0.04088     | 0.101455     | 2.45551E-05 |
| 466 | 7   | 31063175  | 31063284  | Lgi4          | ENSMUSG00000036560 | 0.177945    | 0.0484528    | 0.00317862  |
| 467 | 7   | 31117136  | 31117223  | Scn1b         | ENSMUSG00000019194 | 0.272901    | 0.241833     | 0.0364253   |
| 468 | 7   | 44898700  | 44898775  | Fuz           | ENSMUSG00000011658 | 0.145119    | 0.00328587   | 0.00195313  |
| 469 | 7   | 44899238  | 44899311  | Fuz           | ENSMUSG00000011658 | 0.43038     | 0.146816     | 0.000936249 |
| 470 | 7   | 4507423   | 4507521   | Tnnt1         | ENSMUSG00000064179 | 0.25        | 0.0333333    | 0.0314301   |
| 471 | 7   | 45134516  | 45135121  | Flt3l         | ENSMUSG00000089989 | 1           | 0.317963     | 0.0413641   |
| 472 | 7   | 45634854  | 45634966  | Rasip1        | ENSMUSG00000044562 | 0.34715     | 0.636552     | 0.0116502   |
| 473 | 7   | 45636581  | 45636719  | Rasip1        | ENSMUSG00000044562 | 0.472081    | 0.675801     | 0.0128424   |
| 474 | 7   | 67733553  | 67734459  | Sym           | ENSMUSG00000030554 | 0.368449    | 0.21962      | 0.00865749  |
| 475 | 7   | 81871490  | 81873731  | Tm6sf1        | ENSMUSG00000038623 | 0.0964864   | 0.193098     | 0.0371084   |

| S/N | Chr | Start     | End       | Gene     | GeneID             | IR ratio 2w | IR ratio 22m | p-value     |
|-----|-----|-----------|-----------|----------|--------------------|-------------|--------------|-------------|
| 476 | 7   | 90444377  | 90445424  | Crebzf   | ENSMUSG00000051451 | 0.229963    | 0.484089     | 0.000019279 |
| 477 | 8   | 105269996 | 105270546 | Hsf4     | ENSMUSG00000033249 | 0.583815    | 0.0959368    | 0.00278678  |
| 478 | 8   | 105331290 | 105331369 | Fhod1    | ENSMUSG00000014778 | 0.0301205   | 0.335878     | 0.0496319   |
| 479 | 8   | 105697945 | 105698030 | Carmil2  | ENSMUSG00000050357 | 0.159249    | 0.0694789    | 0.000665504 |
| 480 | 8   | 105704249 | 105704350 | Enkd1    | ENSMUSG00000013155 | 0.00658212  | 0.178508     | 0.00401235  |
| 481 | 8   | 123226419 | 123226945 | Cdk10    | ENSMUSG00000033862 | 0.115219    | 0.0720141    | 0.0378907   |
| 482 | 8   | 123227017 | 123227422 | Cdk10    | ENSMUSG00000033862 | 0.176755    | 0.0864241    | 0.00166403  |
| 483 | 8   | 123228900 | 123229111 | Cdk10    | ENSMUSG00000033862 | 0.121255    | 0.0534813    | 0.00274455  |
| 484 | 8   | 123230327 | 123230593 | Cdk10    | ENSMUSG00000033862 | 0.185179    | 0.0725087    | 4.08655E-05 |
| 485 | 8   | 25734886  | 25735008  | Ddhd2    | ENSMUSG00000061313 | 0.155525    | 0.0918694    | 0.0343861   |
| 486 | 8   | 25735111  | 25735744  | Ddhd2    | ENSMUSG00000061313 | 0.14301     | 0.0694191    | 0.0223225   |
| 487 | 8   | 3512865   | 3514782   | Mcoln1   | ENSMUSG00000004567 | 0.0873884   | 0.141622     | 0.0077044   |
| 488 | 8   | 3514913   | 3515013   | Mcoln1   | ENSMUSG00000004567 | 0.0721649   | 0.122085     | 0.0329062   |
| 489 | 8   | 4325288   | 4327756   | Ccl25    | ENSMUSG00000023235 | 0.00993303  | 0.138862     | 0.018102    |
| 490 | 8   | 45980492  | 45980572  | Ufsp2    | ENSMUSG00000031634 | 0.124786    | 0.0657114    | 0.0065417   |
| 491 | 8   | 56294712  | 56294938  | Hpgd     | ENSMUSG00000031613 | 0.112008    | 0.010838     | 0.0354656   |
| 492 | 8   | 69797836  | 69797940  | Atp13a1  | ENSMUSG00000031862 | 0.0330789   | 0.1          | 0.0181691   |
| 493 | 8   | 69798513  | 69798583  | Atp13a1  | ENSMUSG00000031862 | 0.146245    | 0.265882     | 0.0127532   |
| 494 | 8   | 70028774  | 70029207  | Mau2     | ENSMUSG00000031858 | 0.0856197   | 0.146169     | 0.011892    |
| 495 | 8   | 70186776  | 70188299  | Slc25a42 | ENSMUSG00000002346 | 0.171454    | 0.0738569    | 0.0346936   |
| 496 | 8   | 70598617  | 70598701  | Ssbp4    | ENSMUSG00000070003 | 0.43918     | 0.323542     | 0.000299656 |
| 497 | 8   | 71367369  | 71367643  | Use1     | ENSMUSG00000002395 | 0.211919    | 0.122692     | 0.00072353  |
| 498 | 8   | 71484881  | 71484999  | Ano8     | ENSMUSG00000034863 | 0.114306    | 0.033437     | 0.000554912 |
| 499 | 8   | 71621896  | 71622702  | Colgalt1 | ENSMUSG00000034807 | 0.294572    | 0.46713      | 0.00174362  |
| 500 | 8   | 72462490  | 72462800  | Cherp    | ENSMUSG00000052488 | 0.125475    | 0.048022     | 0.00311793  |
| 501 | 8   | 83721852  | 83722229  | Ddx39    | ENSMUSG00000005481 | 0.250651    | 0.434325     | 0.0102926   |
| 502 | 8   | 84868086  | 84868223  | Farsa    | ENSMUSG00000003808 | 0.125964    | 0.19781      | 0.0471848   |
| 503 | 8   | 84998137  | 84998203  | Hook2    | ENSMUSG00000052566 | 0.217391    | 0.0769231    | 0.0460821   |
| 504 | 8   | 85064496  | 85064580  | Fbxw9    | ENSMUSG00000008167 | 0.20373     | 0.426949     | 0.00149773  |
| 505 | 8   | 85066169  | 85066272  | Fbxw9    | ENSMUSG00000008167 | 0.0364794   | 0.10673      | 0.00539121  |
| 506 | 8   | 85075937  | 85076023  | Wdr83    | ENSMUSG00000005150 | 0.155935    | 0.0667854    | 0.00961844  |
| 507 | 8   | 91106983  | 91107057  | Rbl2     | ENSMUSG00000031666 | 0.131403    | 0.0405904    | 0.01712     |
| 508 | 9   | 106435014 | 106435095 | Acy1     | ENSMUSG00000023262 | 0.25        | 0.0587875    | 0.0164911   |
| 509 | 9   | 107980959 | 107981203 | Uba7     | ENSMUSG00000032596 | 0.5         | 0.0321349    | 0.0130267   |
| 510 | 9   | 108299458 | 108299744 | Amt      | ENSMUSG00000032607 | 0.133166    | 0.312825     | 0.00481138  |
| 511 | 9   | 108563691 | 108563912 | Impdh2   | ENSMUSG00000062867 | 0.617117    | 0.173298     | 0.0116099   |
| 512 | 9   | 108571864 | 108571940 | Dalrd3   | ENSMUSG00000019039 | 0.299703    | 0.237276     | 0.0441115   |
| 513 | 9   | 110389163 | 110389240 | Ptpn23   | ENSMUSG00000036057 | 0.107299    | 0.0522876    | 0.0484045   |
| 514 | 9   | 110626630 | 110626732 | Nbeal2   | ENSMUSG00000056724 | 0.00705687  | 0.190852     | 0.0171251   |
| 515 | 9   | 121784240 | 121784587 | Hhatl    | ENSMUSG00000032523 | 0.289474    | 0.100144     | 0.0168081   |
| 516 | 9   | 15317593  | 15317673  | Cep295   | ENSMUSG00000046111 | 0.303483    | 0.114286     | 0.0448295   |
| 517 | 9   | 21073181  | 21073263  | Fdx1l    | ENSMUSG00000079677 | 0.400705    | 0.267041     | 0.00315754  |
| 518 | 9   | 21073318  | 21073388  | Fdx1l    | ENSMUSG00000079677 | 0.52381     | 0.287785     | 0.000173913 |
| 519 | 9   | 21419548  | 21419624  | Qtrt1    | ENSMUSG00000002825 | 0.165354    | 0.29771      | 0.0202229   |
| 520 | 9   | 21590028  | 21590110  | Yipf2    | ENSMUSG00000032182 | 0.242991    | 0.112172     | 0.0408275   |
| 521 | 9   | 21590277  | 21590355  | Yipf2    | ENSMUSG00000032182 | 0.129032    | 0.0397436    | 0.014899    |
| 522 | 9   | 21592218  | 21592527  | Yipf2    | ENSMUSG00000032182 | 0.246244    | 0.140578     | 0.0308936   |
| 523 | 9   | 21960611  | 21960689  | Epor     | ENSMUSG00000006235 | 0.666667    | 0.261582     | 0.0366967   |

| S/N | Chr | Start     | End       | Gene    | GeneID             | IR ratio 2w | IR ratio 22m | p-value     |
|-----|-----|-----------|-----------|---------|--------------------|-------------|--------------|-------------|
| 524 | 9   | 21990244  | 21990396  | Ccdc151 | ENSMUSG00000039632 | 0.142857    | 0.00957015   | 0.014817    |
| 525 | 9   | 35217747  | 35217928  | Fam118b | ENSMUSG00000050471 | 0.0649228   | 0.184701     | 0.00784987  |
| 526 | 9   | 35223742  | 35227163  | Fam118b | ENSMUSG00000050471 | 0.0341554   | 0.111438     | 0.014414    |
| 527 | 9   | 37419808  | 37420016  | Robo3   | ENSMUSG00000032128 | 0.476071    | 0.794989     | 0.0103304   |
| 528 | 9   | 45859059  | 45859278  | Bace1   | ENSMUSG00000032086 | 0.164452    | 0.281131     | 9.15946E-05 |
| 529 | 9   | 45859450  | 45860053  | Bace1   | ENSMUSG00000032086 | 0.112143    | 0.215571     | 5.57885E-05 |
| 530 | 9   | 46273367  | 46273477  | Zpr1    | ENSMUSG00000032078 | 0.214554    | 0.119731     | 0.0246673   |
| 531 | 9   | 48474513  | 48475119  | Rexo2   | ENSMUSG00000032026 | 0.16675     | 0.263468     | 5.54657E-05 |
| 532 | 9   | 49009233  | 49010242  | Usp28   | ENSMUSG00000032267 | 0.160142    | 0.334762     | 0.0420599   |
| 533 | 9   | 53453435  | 53453531  | Atm     | ENSMUSG00000034218 | 0.2         | 0.03125      | 0.0343136   |
| 534 | 9   | 58025606  | 58026084  | Cyp11a1 | ENSMUSG00000032323 | 0.0328453   | 0.174986     | 0.0297651   |
| 535 | 9   | 58026282  | 58026693  | Cyp11a1 | ENSMUSG00000032323 | 0.00914257  | 0.124207     | 0.0174262   |
| 536 | 9   | 59716027  | 59716207  | Gramd2  | ENSMUSG00000074259 | 0.00750626  | 0.130188     | 0.00877009  |
| 537 | 9   | 64307348  | 64307429  | Dis3l   | ENSMUSG00000032396 | 0.0208333   | 0.130705     | 0.00169318  |
| 538 | 9   | 73018083  | 73021285  | Pigb    | ENSMUSG00000079469 | 0.119085    | 0.373697     | 0.0182653   |
| 539 | 9   | 73036821  | 73038622  | Pigb    | ENSMUSG00000079469 | 0.00129657  | 0.331638     | 2.74541E-05 |
| 540 | 9   | 89911592  | 89915491  | Rasgrf1 | ENSMUSG00000032356 | 0.480234    | 0.635238     | 0.0349653   |
| 541 | X   | 100733739 | 100733898 | Gdpd2   | ENSMUSG00000019359 | 0.00223214  | 0.150155     | 0.0310437   |
| 542 | X   | 101652208 | 101655623 | Ogt     | ENSMUSG00000034160 | 0.188242    | 0.278715     | 0.00629067  |
| 543 | X   | 13071733  | 13072214  | Usp9x   | ENSMUSG00000031010 | 0.263595    | 0.106542     | 0.010189    |
| 544 | X   | 134072474 | 134072677 | Cstf2   | ENSMUSG00000031256 | 0.0871191   | 0.14799      | 0.0304232   |
| 545 | X   | 150645521 | 150645693 | Tro     | ENSMUSG00000025272 | 0.201954    | 0.141126     | 0.0322044   |
| 546 | X   | 151088111 | 151088602 | Fgd1    | ENSMUSG00000025265 | 0.604844    | 0.748943     | 0.0360752   |
| 547 | X   | 20641256  | 20642743  | Rbm10   | ENSMUSG00000031060 | 0.182981    | 0.103512     | 0.0431743   |
| 548 | X   | 20851812  | 20851929  | Araf    | ENSMUSG00000001127 | 0.167951    | 0.119053     | 0.000201398 |
| 549 | X   | 73657513  | 73657719  | Pnck    | ENSMUSG00000002012 | 0.126315    | 0.0365922    | 1.0231E-06  |
| 550 | X   | 74021963  | 74022184  | Irak1   | ENSMUSG00000031392 | 0.07239     | 0.133958     | 0.048915    |
| 551 | X   | 74226334  | 74226860  | Flna    | ENSMUSG00000031328 | 0.669013    | 0.416095     | 0.00126527  |
| 552 | X   | 74227335  | 74227490  | Flna    | ENSMUSG00000031328 | 0.475847    | 0.33134      | 0.0366958   |
| 553 | X   | 74336422  | 74336491  | Plxna3  | ENSMUSG00000031398 | 0.125       | 0.0108481    | 0.0216065   |
| 554 | Y   | 927891    | 927969    | Kdm5d   | ENSMUSG00000056673 | 0.133333    | 0.0303676    | 0.0328535   |

### **Explanation**

**Start:** The genomic coordinates of the start of the retained intron.

**End:** The genomic coordinates of the end of the retained intron.

**Gene:** The gene that contains the differential retained intron.
