# Supplementary material for: Increased intron retention is a post‐transcriptional signature associated with progressive aging and Alzheimer’s disease
Source: PubMed Central journal article supplement (PMC6516162; doi:10.1111/acel.12928), 2019-03-13
Supplement: ACEL-18-e12928-s005.pdf [file ACEL-18-e12928-s005.pdf]

**Table S4: DAVID functional annotation chart of differential IR genes between Young & Old mouse hippocampus (Stilling et al, 2014)**

| <b>GOTERM_BP_ALL</b>                                     | <b>Count</b> | <b>%</b> | <b>P-Value</b> | <b>Fold Enrichment</b> | <b>Benjamini value</b> |
|----------------------------------------------------------|--------------|----------|----------------|------------------------|------------------------|
| GO:0090305~nucleic acid phosphodiester bond hydrolysis   | 5            | 5.494505 | 0.001280429    | 10.47381835            | 0.896990726            |
| GO:0043112~receptor metabolic process                    | 5            | 5.494505 | 0.005170874    | 7.119458225            | 0.98993272             |
| GO:0031623~receptor internalization                      | 4            | 4.395604 | 0.00615356     | 10.62709374            | 0.9740101              |
| GO:0001919~regulation of receptor recycling              | 3            | 3.296703 | 0.007113804    | 23.34165232            | 0.957838492            |
| GO:0006396~RNA processing                                | 10           | 10.98901 | 0.007703361    | 2.84778329             | 0.935670323            |
| GO:0044237~cellular metabolic process                    | 56           | 61.53846 | 0.011832331    | 1.245650767            | 0.970379475            |
| GO:0031668~cellular response to extracellular stimulus   | 5            | 5.494505 | 0.013213039    | 5.419289097            | 0.96564064             |
| GO:0071840~cellular component organization or biogenesis | 37           | 40.65934 | 0.030106569    | 1.335207984            | 0.998862239            |
| GO:0008152~metabolic process                             | 59           | 64.83516 | 0.030806789    | 1.181385099            | 0.997904288            |
| GO:0090501~RNA phosphodiester bond hydrolysis            | 3            | 3.296703 | 0.032233021    | 10.54139137            | 0.997009527            |
| GO:0016071~mRNA metabolic process                        | 7            | 7.692308 | 0.032702594    | 2.888234757            | 0.995309431            |
| GO:0043170~macromolecule metabolic process               | 50           | 54.94505 | 0.034464801    | 1.225835143            | 0.9943996              |
| GO:0033572~transferrin transport                         | 2            | 2.197802 | 0.035715342    | 54.46385542            | 0.993007619            |
| GO:0071496~cellular response to external stimulus        | 5            | 5.494505 | 0.036798591    | 3.94665619             | 0.991355793            |
| GO:0042254~ribosome biogenesis                           | 5            | 5.494505 | 0.037630151    | 3.91826298             | 0.989286908            |
| GO:0022613~ribonucleoprotein complex biogenesis          | 6            | 6.593407 | 0.040653931    | 3.142145505            | 0.989965137            |
| GO:0009987~cellular process                              | 79           | 86.81319 | 0.042056723    | 1.07077573             | 0.988708476            |
| GO:0023051~regulation of signaling                       | 20           | 21.97802 | 0.044232943    | 1.551676793            | 0.988423265            |
| GO:0051304~chromosome separation                         | 3            | 3.296703 | 0.044471217    | 8.831976555            | 0.985698146            |
| GO:0031123~RNA 3'-end processing                         | 3            | 3.296703 | 0.045558113    | 8.714216867            | 0.984012528            |
| GO:0035690~cellular response to drug                     | 3            | 3.296703 | 0.047761179    | 8.487873572            | 0.98398477             |
| GO:0090304~nucleic acid metabolic process                | 30           | 32.96703 | 0.049280596    | 1.360179532            | 0.983008883            |

**Table S4: Human orthologs of the differential mouse IR genes identified in aging hippocampus (Stilling et al., 2014)**

| S/N | Mus Gene ID | MGI ID  | Mouse Symbol  | Species | Human GeneID | HGNC ID | Human Symbol | DIOPT Score | Weighted Score | Rank | Best Score |
|-----|-------------|---------|---------------|---------|--------------|---------|--------------|-------------|----------------|------|------------|
| 1   | 81898       | 1932339 | Sf3b1         | Human   | 23451        | 10768   | SF3B1        | 14          | 14.29          | high | Yes        |
| 2   | 75619       | 1922869 | Fastkd2       | Human   | 22868        | 29160   | FASTKD2      | 15          | 15.3           | high | Yes        |
| 3   | 226432      | 1918944 | Ipo9          | Human   | 55705        | 19425   | IPO9         | 15          | 15.24          | high | Yes        |
| 4   | 66155       | 1913405 | Ufc1          | Human   | 51506        | 26941   | UFC1         | 15          | 15.24          | high | Yes        |
| 5   | 103425      | 1926081 | Ncln          | Human   | 56926        | 26923   | NCLN         | 15          | 15.3           | high | Yes        |
| 6   | 59013       | 1891925 | Hnrnph1       | Human   | 3187         | 5041    | HNRNPH1      | 13          | 13.38          | high | Yes        |
| 7   | 22671       | 106611  | Rnf112        | Human   | 7732         | 12968   | RNF112       | 12          | 12.43          | high | Yes        |
| 8   | 68626       | 1890496 | Elac2         | Human   | 60528        | 14198   | ELAC2        | 15          | 15.24          | high | Yes        |
| 9   | 56310       | 1891751 | Gps2          | Human   | 2874         | 4550    | GPS2         | 14          | 14.29          | high | Yes        |
| 10  | 72149       | 1919399 | Strada        | Human   | 92335        | 30172   | STRADA       | 16          | 16.25          | high | Yes        |
| 11  | 170472      | 2156841 | Recql5        | Human   | 9400         | 9950    | RECQL5       | 15          | 15.24          | high | Yes        |
| 12  | 73389       | 894659  | Hbp1          | Human   | 26959        | 23200   | HBP1         | 14          | 14.29          | high | Yes        |
| 13  | 107522      | 1101356 | Ece2          | Human   | 9718         | 13275   | ECE2         | 14          | 14.31          | high | Yes        |
| 14  | 22042       | 98822   | Tfrc          | Human   | 7037         | 11763   | TFRC         | 16          | 16.25          | high | Yes        |
| 15  | 224619      | 3042141 | Traf7         | Human   | 84231        | 20456   | TRAF7        | 14          | 14.29          | high | Yes        |
| 16  | 268933      | 2446285 | Wdr24         | Human   | 84219        | 20852   | WDR24        | 13          | 13.29          | high | Yes        |
| 17  | 67676       | 1914926 | Rpp21         | Human   | 79897        | 21300   | RPP21        | 14          | 14.29          | high | Yes        |
| 18  | 269033      | 1922045 | 4930503L19Rik | Human   | 162681       | 13796   | C18orf54     | 12          | 12.21          | high | Yes        |
| 19  | 107392      | 2388804 | Brms1         | Human   | 25855        | 17262   | BRMS1        | 15          | 15.3           | high | Yes        |
| 20  | 170791      | 2157953 | Rbm39         | Human   | 9584         | 15923   | RBM39        | 14          | 14.29          | high | Yes        |
| 21  | 69639       | 1916889 | Exosc8        | Human   | 11340        | 17035   | EXOSC8       | 15          | 15.22          | high | Yes        |
| 22  | 14800       | 95809   | Gria2         | Human   | 2891         | 4572    | GRIA2        | 15          | 15.3           | high | Yes        |
| 23  | 229503      | 2387197 | Rrnad1        | Human   | 51093        | 24273   | RRNAD1       | 14          | 14.29          | high | Yes        |
| 24  | 66625       | 1913875 | Pnizr         | Human   | 25957        | 21222   | PNISR        | 14          | 14.29          | high | Yes        |
| 25  | 69940       | 2445020 | Exoc1         | Human   | 55763        | 30380   | EXOC1        | 14          | 14.29          | high | Yes        |
| 26  | 69663       | 1916913 | Ddx51         | Human   | 317781       | 20082   | DDX51        | 14          | 14.28          | high | Yes        |
| 27  | 233895      | 2384565 | Prr14         | Human   | 78994        | 28458   | PRR14        | 14          | 14.29          | high | Yes        |
| 28  | 69697       | 1916947 | Camsap3       | Human   | 57662        | 29307   | CAMSAP3      | 15          | 15.3           | high | Yes        |
| 29  | 212139      | 2384831 | Cc2d1a        | Human   | 54862        | 30237   | CC2D1A       | 15          | 15.3           | high | Yes        |
| 30  | 11459       | 87902   | Acta1         | Human   | 58           | 129     | ACTA1        | 15          | 15.3           | high | Yes        |
| 31  | 13430       | 109547  | Dnm2          | Human   | 1785         | 2974    | DNM2         | 15          | 15.24          | high | Yes        |

| S/N | Mus Gene ID | MGI ID  | Mouse Symbol | Species | Human GeneID | HGNC ID | Human Symbol | DIOPT Score | Weighted Score | Rank | Best Score |
|-----|-------------|---------|--------------|---------|--------------|---------|--------------|-------------|----------------|------|------------|
| 32  | 104444      | 1888981 | Rexo2        | Human   | 25996        | 17851   | REXO2        | 15          | 15.24          | high | Yes        |
| 33  | 53623       | 95810   | Gria3        | Human   | 2892         | 4573    | GRIA3        | 15          | 15.24          | high | Yes        |
| 34  | 216136      | 1351911 | Ilvbl        | Human   | 10994        | 6041    | ILVBL        | 14          | 14.21          | high | Yes        |
| 35  | 80904       | 2135752 | Dtx3         | Human   | 196403       | 24457   | DTX3         | 15          | 15.3           | high | Yes        |
| 36  | 216456      | 2143539 | Gls2         | Human   | 27165        | 29570   | GLS2         | 16          | 16.25          | high | Yes        |
| 37  | 23943       | 1344426 | Esyt1        | Human   | 23344        | 29534   | ESYT1        | 14          | 14.4           | high | Yes        |
| 38  | 14799       | 95808   | Gria1        | Human   | 2890         | 4571    | GRIA1        | 15          | 15.3           | high | Yes        |
| 39  | 14756       | 106604  | Gpld1        | Human   | 2822         | 4459    | GPLD1        | 15          | 15.24          | high | Yes        |
| 40  | 19336       | 105065  | Rab24        | Human   | 53917        | 9765    | RAB24        | 15          | 15.3           | high | Yes        |
| 41  | 67399       | 1914649 | Pdlim7       | Human   | 9260         | 22958   | PDLIM7       | 15          | 15.24          | high | Yes        |
| 42  | 239510      | 2444412 | Phf20l1      | Human   | 51105        | 24280   | PHF20L1      | 15          | 15.3           | high | Yes        |
| 43  | 223646      | 2442664 | Naprt        | Human   | 93100        | 30450   | NAPRT        | 14          | 14.29          | high | Yes        |
| 44  | 66656       | 1913906 | Eef1d        | Human   | 1936         | 3211    | EEF1D        | 14          | 14.29          | high | Yes        |
| 45  | 13350       | 1333825 | Dgat1        | Human   | 8694         | 2843    | DGAT1        | 14          | 14.31          | high | Yes        |
| 46  | 268822      | 2679274 | Adck5        | Human   | 203054       | 21738   | ADCK5        | 16          | 16.25          | high | Yes        |
| 47  | 94230       | 2679722 | Cpsf1        | Human   | 29894        | 2324    | CPSF1        | 14          | 14.31          | high | Yes        |
| 48  | 12651       | 1328313 | Chkb         | Human   | 1120         | 1938    | CHKB         | 14          | 14.31          | high | Yes        |
| 49  | 54003       | 1858510 | Nell2        | Human   | 4753         | 7751    | NELL2        | 14          | 14.29          | high | Yes        |
| 50  | 72168       | 1919418 | Aifm3        | Human   | 150209       | 26398   | AIFM3        | 15          | 15.24          | high | Yes        |
| 51  | 50817       | 1355075 | Capn15       | Human   | 6650         | 11182   | CAPN15       | 15          | 15.3           | high | Yes        |
| 52  | 224656      | 2687278 | Zfp523       | Human   | 7629         | 13149   | ZNF76        | 12          | 12.29          | high | Yes        |
| 53  | 16549       | 1336214 | Khsrp        | Human   | 8570         | 6316    | KHSRP        | 12          | 12.35          | high | Yes        |
| 54  | 277250      | 1923356 | Kdm3b        | Human   | 51780        | 1337    | KDM3B        | 14          | 14.27          | high | Yes        |
| 55  | 71711       | 1918961 | Mus81        | Human   | 80198        | 29814   | MUS81        | 14          | 14.29          | high | Yes        |
| 56  | 20469       | 107576  | Sipa1        | Human   | 6494         | 10885   | SIPA1        | 15          | 15.3           | high | Yes        |
| 57  | 56613       | 1930076 | Rps6ka4      | Human   | 8986         | 10433   | RPS6KA4      | 15          | 15.29          | high | Yes        |
| 58  | 12982       | 1339754 | Csf2ra       | Human   | 1438         | 2435    | CSF2RA       | 13          | 13.26          | high | Yes        |
| 59  | 71435       | 1918685 | Arhgap21     | Human   | 57584        | 23725   | ARHGAP21     | 14          | 14.29          | high | Yes        |
| 60  | 68427       | 1915677 | Slc39a13     | Human   | 91252        | 20859   | SLC39A13     | 15          | 15.24          | high | Yes        |
| 61  | 99010       | 2138993 | Lpcat4       | Human   | 254531       | 30059   | LPCAT4       | 16          | 16.25          | high | Yes        |
| 62  | 67145       | 1914395 | Tomm34       | Human   | 10953        | 15746   | TOMM34       | 14          | 14.29          | high | Yes        |
| 63  | 241915      | 2181434 | Phc3         | Human   | 80012        | 15682   | PHC3         | 16          | 16.25          | high | Yes        |

| S/N | Mus Gene ID | MGI ID  | Mouse Symbol | Species | Human GeneID | HGNC ID | Human Symbol | DIOPT Score | Weighted Score | Rank | Best Score |
|-----|-------------|---------|--------------|---------|--------------|---------|--------------|-------------|----------------|------|------------|
| 64  | 360213      | 2673000 | Trim46       | Human   | 80128        | 19019   | TRIM46       | 14          | 14.4           | high | Yes        |
| 65  | 170822      | 2159711 | Usp33        | Human   | 23032        | 20059   | USP33        | 13          | 13.39          | high | Yes        |
| 66  | 76608       | 1923858 | Hectd3       | Human   | 79654        | 26117   | HECTD3       | 13          | 13.33          | high | Yes        |
| 67  | 19268       | 102695  | Ptprf        | Human   | 5792         | 9670    | PTPRF        | 15          | 15.3           | high | Yes        |
| 68  | 68180       | 1915430 | Hyi          | Human   | 81888        | 26948   | HYI          | 11          | 11.37          | high | Yes        |
| 69  | 59002       | 1891749 | Wrap73       | Human   | 49856        | 12759   | WRAP73       | 14          | 14.29          | high | Yes        |
| 70  | 12537       | 88353   | Cdk11b       | Human   | 984          | 1729    | CDK11B       | 13          | 13.39          | high | Yes        |
| 71  | 68796       | 1916046 | Tmem214      | Human   | 54867        | 25983   | TMEM214      | 13          | 13.26          | high | Yes        |
| 72  | 15932       | 96418   | Idua         | Human   | 3425         | 5391    | IDUA         | 15          | 15.24          | high | Yes        |
| 73  | 24100       | 1345190 | Tpra1        | Human   | 131601       | 30413   | TPRA1        | 13          | 13.26          | high | Yes        |
| 74  | 232875      | 3643810 | Zscan18      | Human   | 65982        | 21037   | ZSCAN18      | 8           | 8.42           | high | Yes        |
| 75  | 330485      | 3607779 | Tmem145      | Human   | 284339       | 26912   | TMEM145      | 13          | 13.29          | high | Yes        |
| 76  | 243961      | 3613677 | Shank1       | Human   | 50944        | 15474   | SHANK1       | 13          | 13.39          | high | Yes        |
| 77  | 381983      | 3039582 | Lmtk3        | Human   | 114783       | 19295   | LMTK3        | 16          | 16.25          | high | Yes        |
| 78  | 320878      | 2444947 | Mical2       | Human   | 9645         | 24693   | MICAL2       | 16          | 16.25          | high | Yes        |
| 79  | 17188       | 1338823 | Maz          | Human   | 4150         | 6914    | MAZ          | 13          | 13.24          | high | Yes        |
| 80  | 330671      | 2652891 | B4galnt4     | Human   | 338707       | 26315   | B4GALNT4     | 15          | 15.3           | high | Yes        |
| 81  | 234214      | 1924574 | Sorbs2       | Human   | 8470         | 24098   | SORBS2       | 12          | 12.38          | high | Yes        |
| 82  | 76900       | 1924150 | Ssbp4        | Human   | 170463       | 15676   | SSBP4        | 15          | 15.3           | high | Yes        |
| 83  | 70796       | 1918046 | Zdhhc1       | Human   | 29800        | 17916   | ZDHHC1       | 15          | 15.24          | high | Yes        |
| 84  | 78658       | 2142989 | Ncapd3       | Human   | 23310        | 28952   | NCAPD3       | 13          | 13.26          | high | Yes        |
| 85  | 73744       | 1920994 | Man2c1       | Human   | 4123         | 6827    | MAN2C1       | 14          | 14.31          | high | Yes        |
| 86  | 71742       | 1918992 | Ulk3         | Human   | 25989        | 19703   | ULK3         | 16          | 16.25          | high | Yes        |
| 87  | 109785      | 97566   | Pgm3         | Human   | 5238         | 8907    | PGM3         | 15          | 15.24          | high | Yes        |
| 88  | 56032       | 1914482 | Nprl2        | Human   | 10641        | 24969   | NPRL2        | 15          | 15.3           | high | Yes        |
| 89  | 15185       | 1333752 | Hdac6        | Human   | 10013        | 14064   | HDAC6        | 16          | 16.25          | high | Yes        |
| 90  | 72554       | 1919804 | Utp14a       | Human   | 10813        | 10665   | UTP14A       | 15          | 15.24          | high | Yes        |
| 91  | 56191       | 1928994 | Tro          | Human   | 7216         | 12326   | TRO          | 14          | 14.29          | high | Yes        |

**Table S4: List of differential IR genes from Hippocampus that overlapped with curated AD genes**

|        |      |        |       |       |       |        |      |
|--------|------|--------|-------|-------|-------|--------|------|
| RNF112 | ECE2 | GRIA2  | ACTA1 | GRIA3 | DGAT1 | IDUA   | MAZ  |
| ELAC2  | TFRC | RRNAD1 | HDAC6 | GRIA1 | KHSRP | SHANK1 | DNM2 |

*16 genes*

**Table S4: List of differential IR genes from PFC (10w:22m) that overlapped with curated AD genes**

|         |       |        |          |       |        |        |       |
|---------|-------|--------|----------|-------|--------|--------|-------|
| NOTCH4  | FANCG | IL18BP | IL18     | SFPQ  | HSF1   | RAF1   | FAAH  |
| MMEL1   | PER2  | CLK1   | MCOLN1   | SRSF3 | OGT    | SRA1   | BACE1 |
| PLXNA3  | PI4KB | DXO    | SLC25A27 | DDIT3 | CDC25B | DDX39A | HMOX2 |
| CCDC167 | HSPA5 | JAG2   | CIZ1     | ABCA7 | SYVN1  |        |       |

*30 genes*

Note: **41 genes with increased IR in old brain tissues.**

**Table S4: Differential IR between young (3 months) and old (24 or 29 months) mouse hippocampus (Stilling et al, 2014)**

| S/N | Gene Symbol   | Ensembl ID         | Position of intron       | pvalue    | IR ratio Older | IR ratio Younger | Timepoint |
|-----|---------------|--------------------|--------------------------|-----------|----------------|------------------|-----------|
| 1   | Sf3b1         | ENSMUSG00000025982 | 1: 55014562- 55016375:-  | 0.0249357 | 0.237500034    | 0.110619515      | 3Mvs24M   |
| 2   | Fastkd2       | ENSMUSG00000025962 | 1: 63735571- 63735844:+  | 0.0267099 | 0.166666838    | 0.02420269       | 3Mvs24M   |
| 3   | Ipo9          | ENSMUSG00000041879 | 1:135405972-135406516:-  | 0.0255961 | 0.123188449    | 0.040462477      | 3Mvs24M   |
| 4   | Ufc1          | ENSMUSG00000062963 | 1:171294827-171294920:-  | 0.0277119 | 0.026385263    | 0.137931127      | 3Mvs24M   |
| 5   | Ncln          | ENSMUSG00000020238 | 10: 81488355- 81488427:- | 0.0324384 | 0.148148335    | 0.021897673      | 3Mvs24M   |
| 6   | Hnrnp1        | ENSMUSG00000007850 | 11: 50379964- 50381458:+ | 0.0010159 | 0.105468775    | 0.027700857      | 3Mvs24M   |
| 7   | Rnf112        | ENSMUSG00000010086 | 11: 61453496- 61453618:- | 0.0379092 | 0.134831518    | 0.050925967      | 3Mvs24M   |
| 8   | Elac2         | ENSMUSG00000020549 | 11: 64998379- 64998507:+ | 0.0126291 | 0.190476393    | 0.020437829      | 3Mvs24M   |
| 9   | Gps2          | ENSMUSG00000023170 | 11: 69914861- 69914932:+ | 0.0303227 | 0.156862853    | 0.027659923      | 3Mvs24M   |
| 10  | Strada        | ENSMUSG00000069631 | 11:106171077-106171155:- | 0.0363153 | 0.121212286    | 0.019160464      | 3Mvs24M   |
| 11  | Recql5        | ENSMUSG00000020752 | 11:115893719-115893946:- | 0.0283485 | 0.300000261    | 0.034300858      | 3Mvs24M   |
| 12  | Hbp1          | ENSMUSG00000002996 | 12: 31937281- 31937617:- | 0.043932  | 0.239130529    | 0.05660391       | 3Mvs24M   |
| 13  | Ece2          | ENSMUSG00000022842 | 16: 20643733- 20643852:+ | 0.0335012 | 0.142857327    | 0.021388425      | 3Mvs24M   |
| 14  | Tfrc          | ENSMUSG00000022797 | 16: 32617199- 32618217:+ | 0.0131239 | 0.163636446    | 0.032786954      | 3Mvs24M   |
| 15  | Traf7         | ENSMUSG00000052752 | 17: 24510075- 24510248:- | 0.0360271 | 0.023254811    | 0.116883214      | 3Mvs24M   |
| 16  | Wdr24         | ENSMUSG00000025737 | 17: 25827356- 25827427:+ | 0.0297336 | 0.393939486    | 0.100000144      | 3Mvs24M   |
| 17  | Rpp21         | ENSMUSG00000024446 | 17: 36257524- 36257605:- | 0.0355231 | 0.024202679    | 0.125000108      | 3Mvs24M   |
| 18  | 4930503L19Rik | ENSMUSG00000044906 | 18: 70467485- 70467758:- | 0.0466842 | 0.777777728    | 0.113712949      | 3Mvs24M   |
| 19  | Brms1         | ENSMUSG00000080268 | 19: 5046729- 5046814:+   | 0.0493787 | 0.024856807    | 0.122807149      | 3Mvs24M   |
| 20  | Rbm39         | ENSMUSG00000027620 | 2:156177385-156179176:-  | 0.0351591 | 0.194594627    | 0.094861701      | 3Mvs24M   |
| 21  | Exosc8        | ENSMUSG00000027752 | 3: 54732026- 54732111:-  | 0.0473622 | 0.150943499    | 0.031489752      | 3Mvs24M   |
| 22  | Gria2         | ENSMUSG00000033981 | 3: 80707258- 80707698:-  | 0.0192212 | 0.116696608    | 0.059639413      | 3Mvs24M   |
| 23  | Rrnad1        | ENSMUSG00000004896 | 3: 87926874- 87927054:-  | 0.0256669 | 0.333333534    | 0.044259159      | 3Mvs24M   |
| 24  | Pnlsr         | ENSMUSG00000028248 | 4: 21869615- 21870351:+  | 0.0394247 | 0.400000039    | 0.196721382      | 3Mvs24M   |
| 25  | Exoc1         | ENSMUSG00000036435 | 5: 76560406- 76561291:+  | 0.0248665 | 0.113636486    | 0.017818628      | 3Mvs24M   |
| 26  | Ddx51         | ENSMUSG00000029504 | 5:110655163-110655306:+  | 0.019128  | 0.272727556    | 0.027050068      | 3Mvs24M   |
| 27  | Prr14         | ENSMUSG00000030822 | 7:127476293-127476383:+  | 0.0451641 | 0.024070767    | 0.112676153      | 3Mvs24M   |
| 28  | Camsap3       | ENSMUSG00000044433 | 8: 3603501- 3603605:+    | 0.0318003 | 0.115384816    | 0.015856938      | 3Mvs24M   |
| 29  | Cc2d1a        | ENSMUSG00000036686 | 8: 84134987- 84135061:-  | 0.0272877 | 0.109091012    | 0.018541004      | 3Mvs24M   |
| 30  | Acta1         | ENSMUSG00000031972 | 8:123892735-123892832:-  | 0.0445125 | 0.178571619    | 0.029667813      | 3Mvs24M   |
| 31  | Dnm2          | ENSMUSG00000033335 | 9: 21505715- 21506332:+  | 0.0354845 | 0.016721858    | 0.105263328      | 3Mvs24M   |

| S/N | Gene Symbol | Ensembl ID         | Position of intron       | pvalue    | IR ratio Older | IR ratio Younger | Timepoint |
|-----|-------------|--------------------|--------------------------|-----------|----------------|------------------|-----------|
| 32  | Rexo2       | ENSMUSG00000032026 | 9: 48473140- 48474401:-  | 0.0428861 | 0.221374082    | 0.107954591      | 3Mvs24M   |
| 33  | Gria3       | ENSMUSG00000001986 | X: 41654253- 41654809:+  | 0.0285232 | 0.28571437     | 0.070175564      | 3Mvs24M   |
| 34  | Ilvbl       | ENSMUSG00000032763 | 10: 78583983- 78584069:+ | 0.039439  | 0.181818271    | 0.032787022      | 3Mvs.29M  |
| 35  | Dtx3        | ENSMUSG00000040415 | 10:127193338-127193729:- | 0.0441704 | 0.260000091    | 0.074626984      | 3Mvs.29M  |
| 36  | Gls2        | ENSMUSG00000044005 | 10:128199758-128200172:+ | 0.0418904 | 0.125000234    | 0.013138648      | 3Mvs.29M  |
| 37  | Esyt1       | ENSMUSG00000025366 | 10:128511786-128511868:- | 0.0168914 | 0.020437879    | 0.250000307      | 3Mvs.29M  |
| 38  | Gria1       | ENSMUSG00000020524 | 11: 57310722- 57317665:+ | 0.0481342 | 0.134770909    | 0.076543236      | 3Mvs.29M  |
| 39  | Rnf112      | ENSMUSG00000010086 | 11: 61450705- 61450827:- | 0.0267848 | 0.24584105     | 0.153078231      | 3Mvs.29M  |
| 40  | Rnf112      | ENSMUSG00000010086 | 11: 61450902- 61450977:- | 0.0010192 | 0.318333347    | 0.163027685      | 3Mvs.29M  |
| 41  | Gpld1       | ENSMUSG00000021340 | 13: 24986918- 24987008:+ | 0.0430063 | 0.152173983    | 0.029411888      | 3Mvs.29M  |
| 42  | Rab24       | ENSMUSG00000034789 | 13: 55320553- 55320744:- | 0.0445593 | 0.182509529    | 0.101639377      | 3Mvs.29M  |
| 43  | Pdlim7      | ENSMUSG00000021493 | 13: 55507123- 55507329:- | 0.0439568 | 0.29310348     | 0.152439081      | 3Mvs.29M  |
| 44  | Phf2011     | ENSMUSG00000072501 | 15: 66597447- 66597676:+ | 0.0350712 | 0.500000198    | 0.053740143      | 3Mvs.29M  |
| 45  | Naprt       | ENSMUSG00000022574 | 15: 75892047- 75892341:- | 0.0130326 | 0.011996152    | 0.151515366      | 3Mvs.29M  |
| 46  | Eef1d       | ENSMUSG00000055762 | 15: 75896919- 75897225:- | 0.0330538 | 0.140000119    | 0.017619736      | 3Mvs.29M  |
| 47  | Dgat1       | ENSMUSG00000022555 | 15: 76503198- 76503273:- | 0.0390963 | 0.15555568     | 0.021074579      | 3Mvs.29M  |
| 48  | Dgat1       | ENSMUSG00000022555 | 15: 76503315- 76503389:- | 0.022355  | 0.211538572    | 0.024427349      | 3Mvs.29M  |
| 49  | Adck5       | ENSMUSG00000022550 | 15: 76594284- 76594363:+ | 0.0373724 | 0.393939553    | 0.051181069      | 3Mvs.29M  |
| 50  | Adck5       | ENSMUSG00000022550 | 15: 76595266- 76595336:+ | 0.0275873 | 0.125000186    | 0.012262738      | 3Mvs.29M  |
| 51  | Cpsf1       | ENSMUSG00000034022 | 15: 76601027- 76601105:- | 0.0156293 | 0.109756174    | 0.011682654      | 3Mvs.29M  |
| 52  | Chkb        | ENSMUSG00000022617 | 15: 89427427- 89427560:- | 0.0051706 | 0.102941268    | 0.007260833      | 3Mvs.29M  |
| 53  | Nell2       | ENSMUSG00000022454 | 15: 95527886- 95528475:- | 0.0482404 | 0.368589767    | 0.221052683      | 3Mvs.29M  |
| 54  | Aifm3       | ENSMUSG00000022763 | 16: 17500534- 17500746:+ | 0.0492623 | 0.112069021    | 0.032786956      | 3Mvs.29M  |
| 55  | Capn15      | ENSMUSG00000037326 | 17: 25962894- 25962961:- | 0.004812  | 0.127272835    | 0.008489588      | 3Mvs.29M  |
| 56  | Zfp523      | ENSMUSG00000024220 | 17: 28201440- 28202114:+ | 0.0452972 | 0.298387132    | 0.150684989      | 3Mvs.29M  |
| 57  | Khsrp       | ENSMUSG00000007670 | 17: 57023593- 57023826:- | 0.0104204 | 0.102272799    | 0.009596468      | 3Mvs.29M  |
| 58  | Kdm3b       | ENSMUSG00000038773 | 18: 34828585- 34828938:+ | 0.0052939 | 0.101695018    | 0.006897792      | 3Mvs.29M  |
| 59  | Mus81       | ENSMUSG00000024906 | 19: 5483558- 5483634:-   | 0.0329039 | 0.164383648    | 0.022868155      | 3Mvs.29M  |
| 60  | Sipa1       | ENSMUSG00000056917 | 19: 5652566- 5652654:-   | 0.0376516 | 0.011496313    | 0.100000188      | 3Mvs.29M  |
| 61  | Rps6ka4     | ENSMUSG00000024952 | 19: 6840405- 6840492:-   | 0.0089539 | 0.28358216     | 0.055555664      | 3Mvs.29M  |
| 62  | Csf2ra      | ENSMUSG00000059326 | 19: 61225214- 61225323:- | 0.0376799 | 0.021074576    | 0.17241401       | 3Mvs.29M  |
| 63  | Arhgap21    | ENSMUSG00000036591 | 2: 20855395- 20855580:-  | 0.0485084 | 0.130612271    | 0.064102602      | 3Mvs.29M  |

| S/N | Gene Symbol | Ensembl ID          | Position of intron      | pvalue    | IR ratio Older | IR ratio Younger | Timepoint |
|-----|-------------|---------------------|-------------------------|-----------|----------------|------------------|-----------|
| 64  | Slc39a13    | ENSMUSG00000002105  | 2: 91065700- 91066012:- | 0.0230237 | 0.15789489     | 0.016230085      | 3Mvs.29M  |
| 65  | Lpcat4      | ENSMUSG000000027134 | 2:112241593-112241924:+ | 0.0372186 | 0.104761964    | 0.02797209       | 3Mvs.29M  |
| 66  | Tomm34      | ENSMUSG00000018322  | 2:164066669-164070466:- | 0.0181865 | 0.100000128    | 0.009352937      | 3Mvs.29M  |
| 67  | Phc3        | ENSMUSG000000037652 | 3: 30916717- 30922196:- | 0.0415333 | 0.111111325    | 0.011996157      | 3Mvs.29M  |
| 68  | Gria2       | ENSMUSG000000033981 | 3: 80689351- 80691319:- | 0.0491888 | 0.128323712    | 0.082251102      | 3Mvs.29M  |
| 69  | Gria2       | ENSMUSG000000033981 | 3: 80690518- 80692284:- | 0.0216942 | 0.295194524    | 0.178137684      | 3Mvs.29M  |
| 70  | Gria2       | ENSMUSG000000033981 | 3: 80707258- 80707698:- | 0.0193985 | 0.116831693    | 0.072992715      | 3Mvs.29M  |
| 71  | Trim46      | ENSMUSG000000042766 | 3: 89236600- 89237616:- | 0.0467425 | 0.288288331    | 0.13445385       | 3Mvs.29M  |
| 72  | Usp33       | ENSMUSG000000025437 | 3:152374789-152374890:+ | 0.026463  | 0.112903276    | 0.033898356      | 3Mvs.29M  |
| 73  | Hectd3      | ENSMUSG000000046861 | 4:117002322-117002509:+ | 0.049759  | 0.127659638    | 0.032608786      | 3Mvs.29M  |
| 74  | Ptprf       | ENSMUSG000000033295 | 4:118226377-118226453:- | 0.0428318 | 0.016230082    | 0.137931276      | 3Mvs.29M  |
| 75  | Hyi         | ENSMUSG000000006395 | 4:118362260-118362362:+ | 0.0484404 | 0.138889058    | 0.018394094      | 3Mvs.29M  |
| 76  | Wrap73      | ENSMUSG000000029029 | 4:154152424-154152560:+ | 0.0475031 | 0.023255912    | 0.120000099      | 3Mvs.29M  |
| 77  | Cdk11b      | ENSMUSG000000029062 | 4:155624941-155625530:+ | 0.0204975 | 0.010218945    | 0.104166825      | 3Mvs.29M  |
| 78  | Tmem214     | ENSMUSG000000038828 | 5: 30871570- 30871720:+ | 0.0418275 | 0.139240577    | 0.037735929      | 3Mvs.29M  |
| 79  | Idua        | ENSMUSG000000033540 | 5:108683153-108683266:+ | 0.0357995 | 0.193548579    | 0.022072912      | 3Mvs.29M  |
| 80  | Tpra1       | ENSMUSG000000002871 | 6: 88910401- 88910547:+ | 0.0166821 | 0.195402371    | 0.028169135      | 3Mvs.29M  |
| 81  | Zscan18     | ENSMUSG000000070822 | 7: 12772115- 12773440:- | 0.0231426 | 0.114285882    | 0.010820063      | 3Mvs.29M  |
| 82  | Tmem145     | ENSMUSG000000043843 | 7: 25308841- 25308978:+ | 0.0316912 | 0.214285845    | 0.026870082      | 3Mvs.29M  |
| 83  | Shank1      | ENSMUSG000000038738 | 7: 44343738- 44344297:+ | 0.0216206 | 0.146341597    | 0.015138087      | 3Mvs.29M  |
| 84  | Lmtk3       | ENSMUSG000000062044 | 7: 45786584- 45786809:+ | 0.0270336 | 0.126182987    | 0.059649154      | 3Mvs.29M  |
| 85  | Mical2      | ENSMUSG000000038244 | 7:112335156-112335328:+ | 0.0017135 | 0.149350665    | 0.066543458      | 3Mvs.29M  |
| 86  | Maz         | ENSMUSG000000030678 | 7:127023168-127023481:- | 0.0155436 | 0.208333539    | 0.016721909      | 3Mvs.29M  |
| 87  | B4galnt4    | ENSMUSG000000055629 | 7:141064555-141064640:+ | 0.0357148 | 0.113095277    | 0.038216615      | 3Mvs.29M  |
| 88  | Sorbs2      | ENSMUSG000000031626 | 8: 45736202- 45741486:+ | 0.0488724 | 0.103448478    | 0.012262736      | 3Mvs.29M  |
| 89  | Ssbp4       | ENSMUSG000000070003 | 8: 70597768- 70598012:- | 0.031874  | 0.190635473    | 0.103896137      | 3Mvs.29M  |
| 90  | Zdhhc1      | ENSMUSG000000039199 | 8:105476529-105476613:- | 0.0379135 | 0.117647136    | 0.02083343       | 3Mvs.29M  |
| 91  | Ncapd3      | ENSMUSG000000035024 | 9: 27052665- 27055471:+ | 0.0483277 | 0.136363882    | 0.015328419      | 3Mvs.29M  |
| 92  | Man2c1      | ENSMUSG000000032295 | 9: 57138969- 57139068:+ | 0.0206811 | 0.104166795    | 0.010411757      | 3Mvs.29M  |
| 93  | Ulk3        | ENSMUSG000000032308 | 9: 57594212- 57594283:+ | 0.026052  | 0.014521658    | 0.16000028       | 3Mvs.29M  |
| 94  | Pgm3        | ENSMUSG000000056131 | 9: 86558508- 86559414:- | 0.0278058 | 0.121212296    | 0.012262736      | 3Mvs.29M  |
| 95  | Nprl2       | ENSMUSG000000010057 | 9:107544634-107544746:+ | 0.0189579 | 0.143884936    | 0.042857202      | 3Mvs.29M  |

| S/N | Gene Symbol | Ensembl ID         | Position of intron      | pvalue    | IR ratio Older | IR ratio Younger | Timepoint |
|-----|-------------|--------------------|-------------------------|-----------|----------------|------------------|-----------|
| 96  | Hdac6       | ENSMUSG00000031161 | X: 7939532- 7939605:-   | 0.0368865 | 0.113207659    | 0.014927833      | 3Mvs.29M  |
| 97  | Utp14a      | ENSMUSG00000063785 | X: 48272919- 48273021:+ | 0.0474654 | 0.222222456    | 0.026214726      | 3Mvs.29M  |
| 98  | Tro         | ENSMUSG00000025272 | X:150651632-150652283:- | 0.0451677 | 0.150684972    | 0.063953538      | 3Mvs.29M  |
