# Supplementary material for: Increased intron retention is a post‐transcriptional signature associated with progressive aging and Alzheimer’s disease
Source: PubMed Central journal article supplement (PMC6516162; doi:10.1111/acel.12928), 2019-03-13
Supplement: ACEL-18-e12928-s006.pdf [file ACEL-18-e12928-s006.pdf]

**Table S5: List of conserved fly and mouse genes that underwent age-dependent IR**

| S/N | Fly Gene   | Total # Introns | # of IR | MouseSymbol | Total # Introns | # of IR |
|-----|------------|-----------------|---------|-------------|-----------------|---------|
| 1   | Actn       | 20              | 1       | Actn1       | 22              | 2       |
| 2   | Arp1       | 5               | 1       | Actr1b      | 14              | 2       |
| 3   | CG10089    | 9               | 1       | Ssh3        | 14              | 1       |
| 4   | CG10249    | 18              | 1       | Kank3       | 12              | 3       |
| 5   | CG10962    | 1               | 1       | Dhrs11      | 6               | 1       |
| 6   | CG11147    | 11              | 1       | Abca8b      | 39              | 1       |
| 7   | CG2064     | 4               | 1       | Dhrs13      | 5               | 1       |
| 8   | CG30427    | 16              | 1       | Far1        | 17              | 1       |
| 9   | CG30491    | 5               | 1       | Dhrs13      | 5               | 1       |
| 10  | CG31321    | 7               | 1       | Slc46a1     | 4               | 2       |
| 11  | CG34417    | 35              | 2       | Smtn        | 33              | 1       |
| 12  | CG4210     | 3               | 2       | Sat2        | 6               | 1       |
| 13  | CG42708    | 13              | 1       | Gls2        | 22              | 1       |
| 14  | CG43897    | 25              | 1       | Pdlim7      | 17              | 5       |
| 15  | CG8388     | 3               | 1       | Zfp335      | 27              | 4       |
| 16  | chp        | 16              | 1       | Scrib       | 41              | 1       |
| 17  | d4         | 7               | 2       | Dpf2        | 14              | 1       |
| 18  | Dip-B      | 5               | 2       | Npepl1      | 11              | 1       |
| 19  | Doa        | 30              | 1       | Clk1        | 12              | 1       |
| 20  | gol        | 8               | 2       | Rnf215      | 10              | 1       |
| 21  | HDAC4      | 22              | 1       | Hdac6       | 30              | 1       |
| 22  | hk         | 20              | 1       | Hook2       | 23              | 1       |
| 23  | Hpr1       | 4               | 1       | Thoc1       | 20              | 1       |
| 24  | Ilk        | 3               | 1       | Ilk         | 13              | 6       |
| 25  | Itp-r83A   | 21              | 2       | Itp3        | 57              | 2       |
| 26  | l(2)k01209 | 8               | 2       | Uckl1       | 20              | 1       |
| 27  | Lar        | 30              | 2       | Ptprf       | 38              | 1       |
| 28  | lbn        | 5               | 1       | Tspan4      | 11              | 2       |
| 29  | Mct1       | 9               | 4       | Slc16a11    | 11              | 1       |
| 30  | mdy        | 12              | 1       | Dgat1       | 17              | 1       |
| 31  | Mhc        | 46              | 8       | Myh7b       | 41              | 4       |
| 32  | Nep3       | 10              | 1       | Ece2        | 24              | 3       |
| 33  | per        | 8               | 1       | Per2        | 23              | 2       |
| 34  | Pfk        | 17              | 1       | Pfkm        | 23              | 1       |
| 35  | Pitslre    | 6               | 2       | Cdk11b      | 24              | 1       |
| 36  | Prm        | 11              | 1       | Myh7b       | 41              | 4       |
| 37  | RhoGEF2    | 27              | 1       | Arhgef1     | 43              | 2       |
| 38  | RyR        | 39              | 1       | Ryr3        | 110             | 3       |
| 39  | sls        | 52              | 5       | Speg        | 52              | 1       |
| 40  | trc        | 5               | 1       | Stk38       | 20              | 1       |
| 41  | Tsp42En    | 4               | 1       | Tspan4      | 11              | 2       |
| 42  | Tsp96F     | 4               | 1       | Tspan4      | 11              | 2       |
| 43  | Unc-89     | 42              | 8       | Speg        | 52              | 1       |
| 44  | up         | 21              | 1       | Tnnt1       | 22              | 1       |
| 45  | Zasp66     | 15              | 6       | Pdlim7      | 17              | 5       |

**Total # Introns:** Total number of introns in the gene

**# of IR:** Number of introns that are differentially retained in aging.
