# Supplementary material for: Increased intron retention is a post‐transcriptional signature associated with progressive aging and Alzheimer’s disease
Source: PubMed Central journal article supplement (PMC6516162; doi:10.1111/acel.12928), 2019-03-13
Supplement: ACEL-18-e12928-s007.pdf [file ACEL-18-e12928-s007.pdf]

**Table S6: DAVID functional annotation chart of differential IR genes between Young & Old human prefrontal cortex**

| <b>GOTERM_BP_5</b>                                                    | <b>Count</b> | <b>%</b> | <b>P-Value</b> | <b>Fold Enrichment</b> | <b>Benjamini value</b> |
|-----------------------------------------------------------------------|--------------|----------|----------------|------------------------|------------------------|
| GO:0030163~protein catabolic process                                  | 55           | 9.734513 | 2.76E-07       | 2.111769159            | 7.93E-04               |
| GO:0044257~cellular protein catabolic process                         | 49           | 8.672566 | 3.63E-07       | 2.214529479            | 5.23E-04               |
| GO:0010498~proteasomal protein catabolic process                      | 34           | 6.017699 | 8.37E-07       | 2.627111337            | 8.02E-04               |
| GO:0043632~modification-dependent macromolecule catabolic process     | 43           | 7.610619 | 1.31E-06       | 2.257971052            | 9.45E-04               |
| GO:0051603~proteolysis involved in cellular protein catabolic process | 46           | 8.141593 | 1.35E-06       | 2.180203687            | 7.77E-04               |
| GO:0044267~cellular protein metabolic process                         | 207          | 36.63717 | 2.07E-06       | 1.315463714            | 9.92E-04               |
| GO:0044265~cellular macromolecule catabolic process                   | 58           | 10.26549 | 8.00E-06       | 1.850473131            | 0.003284399            |
| GO:0006886~intracellular protein transport                            | 59           | 10.44248 | 1.46E-05       | 1.801177228            | 0.005255264            |
| GO:0006464~cellular protein modification process                      | 164          | 29.02655 | 2.12E-05       | 1.337557718            | 0.006747364            |
| GO:0036211~protein modification process                               | 164          | 29.02655 | 2.12E-05       | 1.337557718            | 0.006747364            |
| GO:0042176~regulation of protein catabolic process                    | 29           | 5.132743 | 2.46E-05       | 2.440624022            | 0.007050565            |
| GO:0036503~ER associated protein degradation (ERAD) pathway           | 13           | 2.300885 | 3.65E-05       | 4.400075541            | 0.009497119            |
| GO:1903362~regulation of cellular protein catabolic process           | 22           | 3.893805 | 6.13E-05       | 2.729314403            | 0.014594634            |
| GO:0048666~neuron development                                         | 54           | 9.557522 | 8.65E-05       | 1.742493048            | 0.018959648            |
| GO:0015031~protein transport                                          | 88           | 15.57522 | 1.73E-04       | 1.473242828            | 0.034915746            |
| GO:0007399~nervous system development                                 | 99           | 17.52212 | 2.23E-04       | 1.420627013            | 0.041803736            |
| GO:0043087~regulation of GTPase activity                              | 41           | 7.256637 | 2.27E-04       | 1.84761048             | 0.04003216             |
| GO:0031175~neuron projection development                              | 46           | 8.141593 | 2.80E-04       | 1.753236013            | 0.046345931            |

| Table S6: List of differential IR genes that overlapped with curated AD genes |           |         |         |
|-------------------------------------------------------------------------------|-----------|---------|---------|
| ABCA2                                                                         | DLG3      | MOG     | STIP1   |
| ABCG4                                                                         | DNMT1     | MTG1    | STUB1   |
| ADAM10                                                                        | EIF4A1    | NAE1    | SV2A    |
| AGRN                                                                          | ETS2      | NPEPPS  | SYVN1   |
| ALS2                                                                          | FAAH      | OGT     | TAOK2   |
| APBB3                                                                         | FLOT1     | OLR1    | TF      |
| APEH                                                                          | GABBR1    | OXA1L   | TNFAIP1 |
| APEX1                                                                         | GRIA2     | PFKFB3  | TRPC4AP |
| ARRB2                                                                         | GRK2      | PIK3CD  | TSC2    |
| ARSA                                                                          | HARS      | PITRM1  | TTBK1   |
| ATN1                                                                          | HGS       | PLK2    | XBP1    |
| BIN1                                                                          | HNRNPA1   | POLDIP2 | XPNPEP1 |
| BRD2                                                                          | HNRNPA2B1 | PRRT2   | ACADVL  |
| BRSK1                                                                         | HSPD1     | PTGDS   | CCL2    |
| C1R                                                                           | KAT5      | PTPN5   | CFB     |
| CDK18                                                                         | L1CAM     | PTPRA   | CPT1B   |
| CDK5R1                                                                        | MAPK8IP1  | RELA    | CYP27A1 |
| CIB1                                                                          | MARK2     | RYR3    | EPOR    |
| CTTN                                                                          | MCOLN1    | SEL1L   | FES     |
| DAPK1                                                                         | MED23     | SMAD3   | LRP2    |
| DGAT1                                                                         | MLX       | SMPD1   | NR1H3   |

Note: *75 Genes with increased IR in old prefrontal cortex*

**Table S6: Differential IR between young (16-20 yrs) & old (70-80 yrs) human prefrontal cortex**

| S/N | Chr | Start     | End       | Gene     | IR ratio-Young | IR ratio-Old | p-value    |
|-----|-----|-----------|-----------|----------|----------------|--------------|------------|
| 1   | 1   | 1042162   | 1043238   | AGRN     | 0.103469       | 0.350257     | 0.00980044 |
| 2   | 1   | 1045876   | 1045963   | AGRN     | 0.0227273      | 0.162869     | 0.0218293  |
| 3   | 1   | 1046088   | 1046159   | AGRN     | 0.109015       | 0.262936     | 0.0271723  |
| 4   | 1   | 109261264 | 109261512 | CELSR2   | 0.0117384      | 0.113846     | 0.0354233  |
| 5   | 1   | 109627316 | 109627428 | AMPD2    | 0.0396341      | 0.227586     | 0.00340395 |
| 6   | 1   | 109628806 | 109629108 | AMPD2    | 0.0442933      | 0.148883     | 0.0352942  |
| 7   | 1   | 109715042 | 109715129 | GSTM5    | 0.166667       | 0.0110717    | 0.0239891  |
| 8   | 1   | 110019626 | 110020730 | AHCYL1   | 0.0406795      | 0.100795     | 0.0485468  |
| 9   | 1   | 110047869 | 110049111 | STRIP1   | 0.0575922      | 0.238208     | 0.0295332  |
| 10  | 1   | 110049238 | 110049459 | STRIP1   | 0.0291453      | 0.177809     | 0.00574505 |
| 11  | 1   | 111477775 | 111477982 | C1orf162 | 0.822072       | 0.333829     | 0.0462912  |
| 12  | 1   | 111777273 | 111780224 | KCND3    | 0.0313666      | 0.281549     | 0.0443213  |
| 13  | 1   | 1255487   | 1256044   | UBE2J2   | 0.131599       | 0.486618     | 0.0206896  |
| 14  | 1   | 1298679   | 1299344   | ACAP3    | 0.145403       | 0.267091     | 0.0247057  |
| 15  | 1   | 1299356   | 1299830   | ACAP3    | 0.223546       | 0.383698     | 0.0290321  |
| 16  | 1   | 1300068   | 1300157   | ACAP3    | 0.0577547      | 0.147601     | 0.0112225  |
| 17  | 1   | 1309851   | 1310633   | PUSL1    | 0.0263282      | 0.220126     | 0.037037   |
| 18  | 1   | 1311924   | 1312017   | CPSF3L   | 0.184994       | 0.0196078    | 0.0111699  |
| 19  | 1   | 1312368   | 1312439   | CPSF3L   | 0.0551583      | 0.21018      | 0.0206662  |
| 20  | 1   | 1315438   | 1315519   | CPSF3L   | 0.313609       | 0.628523     | 0.0347054  |
| 21  | 1   | 145836574 | 145836814 | POLR3C   | 0.0135811      | 0.124567     | 0.0433735  |
| 22  | 1   | 149907833 | 149908041 | SV2A     | 0.0802056      | 0.208041     | 0.00231907 |
| 23  | 1   | 151139701 | 151139975 | SEMA6C   | 0.0178187      | 0.198074     | 0.0323934  |
| 24  | 1   | 151400588 | 151400763 | PSMB4    | 0.101645       | 0.261223     | 6.33E-07   |
| 25  | 1   | 151400845 | 151401238 | PSMB4    | 0.0780136      | 0.139568     | 0.00340709 |
| 26  | 1   | 151401355 | 151401541 | PSMB4    | 0.0543869      | 0.126004     | 0.00290245 |
| 27  | 1   | 153778355 | 153778462 | SLC27A3  | 1              | 0.270703     | 0.0104698  |
| 28  | 1   | 153932777 | 153932860 | DENND4B  | 0.0452163      | 0.162162     | 0.0352313  |
| 29  | 1   | 154585344 | 154585752 | ADAR     | 0.106019       | 0.205495     | 0.0398742  |
| 30  | 1   | 154588258 | 154588550 | ADAR     | 0.0994075      | 0.279472     | 0.0216584  |
| 31  | 1   | 154948005 | 154948132 | PBXIP1   | 0.374525       | 0.0389484    | 0.004672   |
| 32  | 1   | 155197213 | 155197462 | THBS3    | 0.173765       | 0.682488     | 0.00861217 |
| 33  | 1   | 155202401 | 155202811 | THBS3    | 0.141602       | 0.609146     | 0.0390067  |
| 34  | 1   | 156743455 | 156743651 | HDGF     | 0.0372716      | 0.164405     | 0.014462   |
| 35  | 1   | 15943519  | 15943598  | ZBTB17   | 0.0159396      | 0.246238     | 0.0264749  |
| 36  | 1   | 160084880 | 160087485 | KCNJ9    | 0.0979441      | 0.257011     | 0.0158451  |
| 37  | 1   | 160092695 | 160092923 | IGSF8    | 0.399262       | 0.524194     | 0.00773123 |
| 38  | 1   | 160093331 | 160093709 | IGSF8    | 0.102999       | 0.201268     | 0.0065214  |
| 39  | 1   | 160332557 | 160333602 | COPA     | 0.0413205      | 0.154294     | 0.0455789  |
| 40  | 1   | 161213921 | 161214155 | NDUFS2   | 0.109081       | 0.448156     | 5.17E-16   |
| 41  | 1   | 161228308 | 161228427 | TOMM40L  | 0.0713672      | 0.318182     | 0.0359365  |
| 42  | 1   | 1669736   | 1670097   | SLC35E2B | 0.264047       | 0.817924     | 0.00433631 |
| 43  | 1   | 1670151   | 1671508   | SLC35E2B | 0.055903       | 0.258244     | 0.0195313  |
| 44  | 1   | 16993835  | 16995975  | ATP13A2  | 0.055705       | 0.151086     | 0.0299411  |
| 45  | 1   | 19243707  | 19243949  | EMC1     | 0.0159067      | 0.27553      | 0.0158535  |
| 46  | 1   | 202909124 | 202911053 | KLHL12   | 0.0154889      | 0.12658      | 0.0470893  |
| 47  | 1   | 203048714 | 203048917 | PPFIA4   | 0.0670761      | 0.292839     | 0.0493233  |
| 48  | 1   | 204222779 | 204223461 | PLEKHA6  | 0.0558065      | 0.232955     | 0.0431982  |

| S/N | Chr | Start     | End       | Gene     | IR ratio-Young | IR ratio-Old | p-value    |
|-----|-----|-----------|-----------|----------|----------------|--------------|------------|
| 49  | 1   | 205526837 | 205527793 | CDK18    | 0.285232       | 0.467489     | 0.0384412  |
| 50  | 1   | 205798815 | 205798956 | SLC41A1  | 0.0786424      | 0.311092     | 0.0472987  |
| 51  | 1   | 206585295 | 206586825 | RASSF5   | 0.0336936      | 0.280899     | 0.0406498  |
| 52  | 1   | 220210489 | 220210800 | RAB3GAP2 | 0.00800377     | 0.218515     | 0.0480841  |
| 53  | 1   | 225842474 | 225844497 | EPHX1    | 0.204173       | 0.367898     | 0.02411    |
| 54  | 1   | 225922383 | 225923700 | PYCR2    | 0.166833       | 0.365821     | 0.023657   |
| 55  | 1   | 228102382 | 228102477 | C1orf35  | 0.178571       | 0.565217     | 0.00672337 |
| 56  | 1   | 229325411 | 229326737 | CCSAP    | 0.00744445     | 0.122073     | 0.00872685 |
| 57  | 1   | 2495570   | 2496606   | PLCH2    | 0.00919823     | 0.128158     | 0.0123102  |
| 58  | 1   | 26032485  | 26033228  | EXTL1    | 0.122329       | 0.246932     | 0.0486331  |
| 59  | 1   | 26474667  | 26475112  | HMGN2    | 0.0169492      | 0.107509     | 0.0277198  |
| 60  | 1   | 32160703  | 32161946  | KPNA6    | 0.0114648      | 0.246471     | 0.00411523 |
| 61  | 1   | 32163313  | 32166104  | KPNA6    | 0.0195155      | 0.185468     | 0.041477   |
| 62  | 1   | 36089115  | 36091243  | ADPRHL2  | 0.0408793      | 0.356991     | 0.0314301  |
| 63  | 1   | 37806976  | 37807100  | YRDC     | 0.0271084      | 0.199367     | 0.0415973  |
| 64  | 1   | 37865888  | 37866458  | INPP5B   | 0.11067        | 0.00663767   | 0.0495712  |
| 65  | 1   | 40413102  | 40414158  | SMAP2    | 0.0550492      | 0.286808     | 0.00201849 |
| 66  | 1   | 41008714  | 41008793  | CTPS1    | 0.047619       | 0.269521     | 0.04096    |
| 67  | 1   | 42747412  | 42747722  | P3H1     | 0.631902       | 0.162968     | 0.048769   |
| 68  | 1   | 43617911  | 43618629  | PTPRF    | 0.0409926      | 0.200724     | 0.022671   |
| 69  | 1   | 44649957  | 44650703  | RNF220   | 0.027153       | 0.21673      | 1.24E-08   |
| 70  | 1   | 45008701  | 45009143  | HECTD3   | 0.0122279      | 0.2327       | 0.0138658  |
| 71  | 1   | 46193388  | 46193563  | POMGNT1  | 0.193223       | 0.575245     | 4.06E-06   |
| 72  | 1   | 46410497  | 46410813  | FAAH     | 0.139518       | 0.316277     | 0.0317964  |
| 73  | 1   | 53218495  | 53218866  | C1orf123 | 0.302376       | 0.497641     | 0.0450563  |
| 74  | 1   | 6588442   | 6588755   | ZBTB48   | 0.0465702      | 0.339724     | 0.0394336  |
| 75  | 1   | 8014396   | 8015307   | ERRFI1   | 0.132853       | 0.484378     | 0.0413018  |
| 76  | 1   | 9724092   | 9724275   | PIK3CD   | 0.0625         | 0.386167     | 0.0443488  |
| 77  | 10  | 101031534 | 101032313 | SFXN3    | 0.0801616      | 0.416541     | 0.030136   |
| 78  | 10  | 109875599 | 109877789 | XPNPEP1  | 0.106383       | 0.446363     | 0.00552924 |
| 79  | 10  | 119576750 | 119577079 | TIAL1    | 0.238137       | 0.665065     | 0.00053094 |
| 80  | 10  | 119823902 | 119826630 | INPP5F   | 0.0283699      | 0.114852     | 0.0269716  |
| 81  | 10  | 119933167 | 119933685 | SEC23IP  | 0.0431507      | 0.368421     | 0.0305176  |
| 82  | 10  | 121959410 | 121959500 | NSMCE4A  | 0.23506        | 0.66879      | 0.0304508  |
| 83  | 10  | 125796188 | 125798064 | UROS     | 0.0463324      | 0.142162     | 0.0498199  |
| 84  | 10  | 133401590 | 133402148 | MTG1     | 0.202899       | 0.506075     | 0.0199328  |
| 85  | 10  | 133557156 | 133557863 | SYCE1    | 0.0357143      | 0.258307     | 0.0365798  |
| 86  | 10  | 17603744  | 17603929  | HACD1    | 0.0214352      | 0.419223     | 0.0184237  |
| 87  | 10  | 3147737   | 3147986   | PITRM1   | 0.0498296      | 0.215959     | 0.00796147 |
| 88  | 10  | 6220865   | 6221380   | PFKFB3   | 0.0115658      | 0.158175     | 0.0151575  |
| 89  | 10  | 6226365   | 6228195   | PFKFB3   | 0.0408455      | 0.175899     | 0.0340407  |
| 90  | 10  | 73782441  | 73783073  | CHCHD1   | 0.095125       | 0.273708     | 0.0287628  |
| 91  | 10  | 73789539  | 73789716  | ZSWIM8   | 0.0271857      | 0.148927     | 0.0229286  |
| 92  | 10  | 95693476  | 95693643  | TCTN3    | 0.0141287      | 0.209806     | 0.0474272  |
| 93  | 10  | 97466159  | 97466503  | MMS19    | 0.056338       | 0.152435     | 0.0432819  |
| 94  | 10  | 97753182  | 97757264  | ZFYVE27  | 0.0987424      | 0.30595      | 0.0463323  |
| 95  | 11  | 111720003 | 111720477 | SIK2     | 0.0163703      | 0.2          | 0.0455539  |
| 96  | 11  | 119097063 | 119097141 | DPAGT1   | 0.112903       | 0.245261     | 0.0284504  |
| 97  | 11  | 119154575 | 119154769 | ABCG4    | 0.0286576      | 0.285714     | 0.037037   |

| S/N | Chr | Start     | End       | Gene        | IR ratio-Young | IR ratio-Old | p-value    |
|-----|-----|-----------|-----------|-------------|----------------|--------------|------------|
| 98  | 11  | 119677219 | 119677554 | NECTIN1     | 0.00886431     | 0.127249     | 0.0118588  |
| 99  | 11  | 126261484 | 126262119 | FAM118B     | 0.0121871      | 0.143723     | 0.0337359  |
| 100 | 11  | 18729027  | 18729452  | PTPN5       | 0.14047        | 0.248781     | 0.0208762  |
| 101 | 11  | 251626    | 251819    | PSMD13      | 0.0628124      | 0.172707     | 0.0187791  |
| 102 | 11  | 373116    | 373190    | B4GALNT4    | 0.0777202      | 0.210394     | 0.00770858 |
| 103 | 11  | 45870532  | 45870841  | CRY2        | 0.0766797      | 0.216194     | 0.0360484  |
| 104 | 11  | 45900452  | 45901979  | MAPK8IP1    | 0.0401422      | 0.141676     | 0.00788726 |
| 105 | 11  | 46656273  | 46657094  | ATG13       | 0.00819371     | 0.200278     | 0.00231655 |
| 106 | 11  | 47173482  | 47173758  | ARFGAP2     | 0.0693667      | 0.256966     | 0.0231804  |
| 107 | 11  | 47261449  | 47261546  | NR1H3       | 0.608209       | 0.128631     | 0.0308023  |
| 108 | 11  | 488647    | 489399    | PTDSS2      | 0.245635       | 0.506845     | 0.0233232  |
| 109 | 11  | 57646405  | 57646750  | YPEL4       | 0.164318       | 0.324389     | 0.0257765  |
| 110 | 11  | 57704106  | 57704301  | MED19       | 0.047619       | 0.473684     | 0.00738188 |
| 111 | 11  | 57808292  | 57808389  | CTNND1      | 0.0463215      | 0.198207     | 0.0141924  |
| 112 | 11  | 61314210  | 61314307  | DDB1        | 0.0654381      | 0.211066     | 0.0103397  |
| 113 | 11  | 61876455  | 61876865  | FADS3       | 0.35528        | 0.693669     | 0.00042387 |
| 114 | 11  | 6270337   | 6270645   | CCKBR       | 0.00751494     | 0.139623     | 0.0169189  |
| 115 | 11  | 63900110  | 63900558  | MARK2       | 0.0682353      | 0.279557     | 0.0285631  |
| 116 | 11  | 6394041   | 6394197   | SMPD1       | 0.173913       | 0.371126     | 0.0336964  |
| 117 | 11  | 64195813  | 64197270  | STIP1       | 0.0208333      | 0.151391     | 0.0208312  |
| 118 | 11  | 64224341  | 64224542  | TRPT1       | 0.0574774      | 0.290789     | 0.0176464  |
| 119 | 11  | 64770408  | 64773429  | SF1         | 0.263081       | 0.47035      | 0.0445102  |
| 120 | 11  | 64911275  | 64911841  | ATG2A       | 0.100402       | 0.508772     | 0.0429114  |
| 121 | 11  | 64931489  | 64931558  | PPP2R5B     | 0.119872       | 0.256111     | 0.00293459 |
| 122 | 11  | 65132351  | 65132731  | SYVN1       | 0.0757759      | 0.206572     | 0.0137804  |
| 123 | 11  | 65649672  | 65649756  | SIPA1       | 0.333333       | 0.00237906   | 0.0225     |
| 124 | 11  | 65655000  | 65655687  | RELA        | 0.0713878      | 0.394714     | 0.00569665 |
| 125 | 11  | 65662088  | 65662178  | RELA        | 0.248042       | 0.0416667    | 0.0452675  |
| 126 | 11  | 65716807  | 65716888  | KAT5        | 0.015873       | 0.124461     | 0.0125913  |
| 127 | 11  | 65865145  | 65865219  | MUS81       | 0.106383       | 0.0116861    | 0.0239621  |
| 128 | 11  | 66564146  | 66564557  | CTSF        | 0.219957       | 0.338363     | 0.0240724  |
| 129 | 11  | 66845562  | 66845859  | RCE1        | 0.02           | 0.13181      | 0.0215189  |
| 130 | 11  | 67280783  | 67281092  | GRK2        | 0.0282686      | 0.118262     | 0.0112303  |
| 131 | 11  | 67352019  | 67352690  | AP003419.11 | 0.0296836      | 0.135341     | 0.0286471  |
| 132 | 11  | 67420840  | 67420938  | CARNS1      | 0.165701       | 0.0420543    | 0.0114452  |
| 133 | 11  | 67608478  | 67608551  | NDUFV1      | 0.0540795      | 0.12619      | 0.0263759  |
| 134 | 11  | 70407591  | 70409830  | CTTN        | 0.22293        | 0.469369     | 0.0221787  |
| 135 | 11  | 72004099  | 72004224  | NUMA1       | 0.115347       | 0.0270701    | 0.0218669  |
| 136 | 11  | 72579608  | 72580576  | PDE2A       | 0.0473734      | 0.105793     | 0.0100132  |
| 137 | 11  | 72589240  | 72589750  | PDE2A       | 0.0444437      | 0.275428     | 1.33E-05   |
| 138 | 11  | 74251018  | 74251647  | PPME1       | 0.0143916      | 0.111576     | 0.00085667 |
| 139 | 11  | 96387613  | 96389843  | CCDC82      | 0.0200524      | 0.27896      | 0.0174851  |
| 140 | 12  | 10160021  | 10160346  | OLR1        | 0.0277778      | 0.418099     | 0.0150062  |
| 141 | 12  | 119710620 | 119712177 | CIT         | 0.260368       | 0.479688     | 0.0382366  |
| 142 | 12  | 120659908 | 120660195 | CABP1       | 0.0972624      | 0.238673     | 1.06E-05   |
| 143 | 12  | 122855903 | 122855979 | HIP1R       | 0.0381679      | 0.146493     | 0.0342597  |
| 144 | 12  | 122976767 | 122976870 | OGFOD2      | 0.25           | 0.0151286    | 0.0480841  |
| 145 | 12  | 122986829 | 122987280 | PITPNM2     | 0.107063       | 0.321839     | 0.0424224  |
| 146 | 12  | 131838327 | 131838611 | MMP17       | 0.0108303      | 0.161677     | 0.00849266 |

| S/N | Chr | Start     | End       | Gene     | IR ratio-Young | IR ratio-Old | p-value    |
|-----|-----|-----------|-----------|----------|----------------|--------------|------------|
| 147 | 12  | 48768716  | 48768936  | ADCY6    | 0.0300231      | 0.192982     | 0.0461635  |
| 148 | 12  | 49003595  | 49003756  | PRKAG1   | 0.0292807      | 0.24255      | 0.00297042 |
| 149 | 12  | 49558970  | 49559213  | MCRS1    | 0.0125375      | 0.135177     | 0.0248424  |
| 150 | 12  | 49559301  | 49559452  | MCRS1    | 0.128946       | 0.335347     | 0.0190753  |
| 151 | 12  | 49801967  | 49802957  | NCKAP5L  | 0.175544       | 0.655773     | 0.0294483  |
| 152 | 12  | 50077363  | 50077999  | ASIC1    | 0.0160967      | 0.120338     | 0.0346266  |
| 153 | 12  | 53039343  | 53039629  | EIF4B    | 0.157395       | 0.371443     | 0.0194862  |
| 154 | 12  | 53171441  | 53171881  | CSAD     | 0.755769       | 0.368683     | 0.042459   |
| 155 | 12  | 53712121  | 53713099  | CALCOCO1 | 0.31182        | 0.509082     | 0.00985679 |
| 156 | 12  | 54284317  | 54284548  | HNRNPA1  | 0.0660529      | 0.14529      | 0.0122497  |
| 157 | 12  | 55938052  | 55938510  | DGKA     | 0.0192466      | 0.239079     | 0.0123457  |
| 158 | 12  | 56138272  | 56138403  | ESYT1    | 0.0693257      | 0.262465     | 0.0405476  |
| 159 | 12  | 56157735  | 56157881  | MYL6B    | 0.045614       | 0.123193     | 0.0420562  |
| 160 | 12  | 56349059  | 56349162  | STAT2    | 0.0657382      | 0.196208     | 0.0368484  |
| 161 | 12  | 57516337  | 57516434  | MARS     | 0.022538       | 0.100488     | 0.0329887  |
| 162 | 12  | 57614400  | 57614515  | ARHGEF25 | 0.0632077      | 0.170721     | 0.00418668 |
| 163 | 12  | 62565380  | 62566013  | MON2     | 0.012052       | 0.195144     | 0.0445645  |
| 164 | 12  | 62566031  | 62566321  | MON2     | 0.00895274     | 0.325809     | 0.0121315  |
| 165 | 12  | 6937561   | 6937844   | ATN1     | 0.0653667      | 0.207143     | 0.0497985  |
| 166 | 12  | 7088986   | 7089292   | C1R      | 0.242902       | 0.667999     | 0.041639   |
| 167 | 12  | 8092784   | 8092871   | NECAP1   | 0.0273973      | 0.18495      | 0.00318629 |
| 168 | 12  | 96280885  | 96282508  | CDK17    | 0.0288744      | 0.119857     | 0.0366442  |
| 169 | 13  | 113996739 | 113999584 | RASA3    | 0.0800405      | 0.298538     | 0.0465691  |
| 170 | 13  | 114243989 | 114244889 | CDC16    | 0.142646       | 0.432995     | 0.0498839  |
| 171 | 13  | 24940785  | 24941986  | TPTE2P1  | 0.500151       | 0.0833333    | 0.04096    |
| 172 | 13  | 29517790  | 29519446  | SLC7A1   | 0.0136932      | 0.150215     | 0.0423875  |
| 173 | 13  | 49522107  | 49523174  | PHF11    | 0.0452021      | 0.309689     | 0.0482828  |
| 174 | 13  | 98000645  | 98002466  | IPO5     | 0.0344335      | 0.184732     | 0.0207958  |
| 175 | 13  | 98796213  | 98797114  | DOCK9    | 0.119241       | 0.269812     | 0.0210544  |
| 176 | 14  | 105479219 | 105479435 | CRIP2    | 0.0176296      | 0.16946      | 1.95E-06   |
| 177 | 14  | 20456101  | 20456667  | APEX1    | 0.0610367      | 0.206952     | 0.0385724  |
| 178 | 14  | 22770278  | 22770460  | OXA1L    | 0.187473       | 0.396298     | 0.0120998  |
| 179 | 14  | 24074125  | 24074290  | CPNE6    | 0.138568       | 0.25994      | 0.0298114  |
| 180 | 14  | 24318568  | 24318653  | ADCY4    | 0.5            | 0.152518     | 0.0357836  |
| 181 | 14  | 35096633  | 35096708  | PPP2R3C  | 0.0176322      | 0.153846     | 0.0380204  |
| 182 | 14  | 49779675  | 49779747  | KLHDC2   | 0.0757199      | 0.339243     | 3.03E-06   |
| 183 | 14  | 49785004  | 49785091  | NEMF     | 0.0619597      | 0.4          | 0.00509854 |
| 184 | 14  | 50982965  | 50983379  | TRIM9    | 0.0789434      | 0.23913      | 0.00612416 |
| 185 | 14  | 64749696  | 64749980  | SPTB     | 0.138483       | 0.554269     | 0.00714071 |
| 186 | 14  | 64951151  | 64951602  | RAB15    | 0.0880428      | 0.222733     | 0.00791807 |
| 187 | 14  | 67573887  | 67574241  | PLEKHH1  | 0.00454733     | 0.116396     | 0.0450632  |
| 188 | 14  | 69703592  | 69704603  | SUSD6    | 0.143946       | 0.741207     | 0.00828126 |
| 189 | 14  | 72954262  | 72954385  | DCAF4    | 0.0150555      | 0.4125       | 0.0459184  |
| 190 | 14  | 73111155  | 73111527  | RBM25    | 0.196459       | 0.432323     | 0.00651935 |
| 191 | 14  | 74290499  | 74292286  | ABCD4    | 0.256237       | 0.608162     | 0.0167131  |
| 192 | 14  | 75003153  | 75003274  | EIF2B2   | 0.0273823      | 0.364706     | 0.0167962  |
| 193 | 14  | 77435393  | 77435843  | VIPAS39  | 0.0977918      | 0.371802     | 0.0491881  |
| 194 | 14  | 81487942  | 81489251  | SEL1L    | 0.00816652     | 0.121282     | 0.0470893  |
| 195 | 14  | 92704361  | 92704639  | LGMN     | 0.0212072      | 0.149925     | 0.0168823  |

| S/N | Chr | Start    | End      | Gene        | IR ratio-Young | IR ratio-Old | p-value    |
|-----|-----|----------|----------|-------------|----------------|--------------|------------|
| 196 | 14  | 92714451 | 92716135 | LG MN       | 0.0310131      | 0.199802     | 0.0453427  |
| 197 | 14  | 94128675 | 94129261 | IFI27L2     | 0.047619       | 0.213393     | 0.0498229  |
| 198 | 15  | 25409207 | 25411907 | UBE3A       | 0.0433799      | 0.502436     | 0.0382658  |
| 199 | 15  | 33826752 | 33827198 | RYR3        | 0.00456621     | 0.317035     | 0.0368729  |
| 200 | 15  | 34359745 | 34360110 | LPCAT4      | 0.224376       | 0.453735     | 0.00016834 |
| 201 | 15  | 40290672 | 40290760 | PLCB2       | 0.62704        | 0.235912     | 0.0276981  |
| 202 | 15  | 41842276 | 41842553 | JMJD7-PLA2G | 0.186787       | 0.439487     | 0.0281639  |
| 203 | 15  | 42547529 | 42548105 | LRRC57      | 0.0197248      | 0.25         | 0.0330579  |
| 204 | 15  | 58610517 | 58610998 | ADAM10      | 0.0182542      | 0.18554      | 0.0377654  |
| 205 | 15  | 67170604 | 67181240 | SMAD3       | 0.0169668      | 0.179396     | 0.0170029  |
| 206 | 15  | 68711706 | 68713924 | CORO2B      | 0.0479403      | 0.199891     | 0.00661981 |
| 207 | 15  | 68718810 | 68719143 | CORO2B      | 0.0479515      | 0.192747     | 0.00135666 |
| 208 | 15  | 74842195 | 74842279 | ULK3        | 0.0515654      | 0.138831     | 0.0340259  |
| 209 | 15  | 74852186 | 74854020 | SCAMP2      | 0.5            | 0.0434108    | 0.0342936  |
| 210 | 15  | 74904712 | 74905153 | FAM219B     | 0.188004       | 0.391359     | 0.00665995 |
| 211 | 15  | 75339344 | 75339701 | COMMD4      | 0.144875       | 0.372883     | 0.0165718  |
| 212 | 15  | 82679800 | 82680174 | AP3B2       | 0.0750424      | 0.280331     | 0.00392569 |
| 213 | 15  | 82688831 | 82689157 | AP3B2       | 0.121841       | 0.283621     | 0.0212861  |
| 214 | 15  | 90231507 | 90232218 | CIB1        | 0.0584431      | 0.226359     | 0.0166545  |
| 215 | 15  | 90877024 | 90877134 | FURIN       | 0.0150094      | 0.207921     | 0.0213726  |
| 216 | 15  | 90889443 | 90889516 | FES         | 0.608696       | 0.0833333    | 0.0272     |
| 217 | 15  | 91006729 | 91006949 | VPS33B      | 0.0324927      | 0.309735     | 0.0298959  |
| 218 | 16  | 1344525  | 1344600  | BAIAP3      | 0.120627       | 0.258824     | 0.034      |
| 219 | 16  | 1352306  | 1361742  | GNPTG       | 0.0793783      | 0.163903     | 0.0361467  |
| 220 | 16  | 1459187  | 1460417  | CLCN7       | 0.191424       | 0.418559     | 0.0274248  |
| 221 | 16  | 1743476  | 1747028  | MAPK8IP3    | 0.171447       | 0.308402     | 0.0358139  |
| 222 | 16  | 2085322  | 2086192  | TSC2        | 0.059289       | 0.181664     | 0.0344448  |
| 223 | 16  | 2235143  | 2235215  | E4F1        | 0.125234       | 0.0120879    | 0.031117   |
| 224 | 16  | 2304150  | 2308449  | ABCA3       | 0.0178774      | 0.173038     | 0.039007   |
| 225 | 16  | 23478501 | 23478882 | GGA2        | 0.0415805      | 0.246714     | 0.0210432  |
| 226 | 16  | 2499420  | 2499834  | TBC1D24     | 0.0545273      | 0.250463     | 0.0256461  |
| 227 | 16  | 2528718  | 2528993  | AMDHD2      | 0.106248       | 0.46589      | 0.00934416 |
| 228 | 16  | 29813933 | 29814332 | PRRT2       | 0.0542638      | 0.177511     | 8.15E-05   |
| 229 | 16  | 29814465 | 29814627 | PRRT2       | 0.118116       | 0.333208     | 1.37E-05   |
| 230 | 16  | 29983664 | 29985212 | TAOK2       | 0.0731124      | 0.214755     | 0.0420859  |
| 231 | 16  | 29993370 | 29993458 | HIRIP3      | 0.0191926      | 0.212735     | 0.0238689  |
| 232 | 16  | 30083567 | 30083654 | PPP4C       | 0.000301932    | 0.143786     | 0.00603772 |
| 233 | 16  | 30108264 | 30108372 | GDPD3       | 0.25           | 0.0013587    | 0.0138408  |
| 234 | 16  | 30186945 | 30187038 | CORO1A      | 0.121563       | 0.23187      | 0.0358346  |
| 235 | 16  | 31034325 | 31034461 | STX4        | 0.188029       | 0.444976     | 0.0406926  |
| 236 | 16  | 31493048 | 31493466 | C16orf58    | 0.302293       | 0.575165     | 0.0152321  |
| 237 | 16  | 31493524 | 31493602 | C16orf58    | 0.289676       | 0.552        | 0.0134679  |
| 238 | 16  | 4802453  | 4802526  | ROGDI       | 0.00889193     | 0.225735     | 0.00039846 |
| 239 | 16  | 50312191 | 50312889 | ADCY7       | 0.18198        | 0.756828     | 0.0375977  |
| 240 | 16  | 57121760 | 57123413 | CPNE2       | 0.0353624      | 0.295661     | 0.0007623  |
| 241 | 16  | 57249852 | 57250410 | ARL2BP      | 0.00469199     | 0.114916     | 0.0276806  |
| 242 | 16  | 58509352 | 58511421 | NDRG4       | 0.0364897      | 0.114479     | 4.16E-06   |
| 243 | 16  | 66809075 | 66810373 | NAE1        | 0.0482287      | 0.219907     | 0.0349131  |
| 244 | 16  | 66823600 | 66824854 | NAE1        | 0.0317813      | 0.176062     | 0.0421774  |

| S/N | Chr | Start    | End      | Gene       | IR ratio-Young | IR ratio-Old | p-value    |
|-----|-----|----------|----------|------------|----------------|--------------|------------|
| 245 | 16  | 66824885 | 66826522 | NAE1       | 0.027118       | 0.300308     | 0.0216392  |
| 246 | 16  | 67000779 | 67000856 | CES4A      | 0.0731707      | 0.325        | 0.00331327 |
| 247 | 16  | 67003360 | 67003514 | CES4A      | 0.253961       | 0.14845      | 0.0285298  |
| 248 | 16  | 67659419 | 67659536 | ACD        | 0.300813       | 0.691656     | 0.0170339  |
| 249 | 16  | 677388   | 677458   | RHBDL1     | 0.119857       | 0.60625      | 3.46E-05   |
| 250 | 16  | 677699   | 677780   | RHBDL1     | 0.371574       | 0.623842     | 0.030201   |
| 251 | 16  | 67881533 | 67881667 | EDC4       | 0.130435       | 0.381261     | 0.0436993  |
| 252 | 16  | 67883731 | 67883955 | EDC4       | 0.111516       | 0.358964     | 0.00831929 |
| 253 | 16  | 681880   | 682019   | STUB1      | 0.199451       | 0.295521     | 0.0281748  |
| 254 | 16  | 70481487 | 70481763 | COG4       | 0.0156986      | 0.222147     | 0.013189   |
| 255 | 16  | 72108382 | 72108472 | DHX38      | 0.0353144      | 0.193425     | 0.0158628  |
| 256 | 16  | 74472411 | 74474545 | GLG1       | 0.0150394      | 0.152747     | 0.022438   |
| 257 | 16  | 89693326 | 89693397 | CDK10      | 0.479167       | 0.74975      | 0.0304855  |
| 258 | 16  | 89693467 | 89694172 | CDK10      | 0.48796        | 0.870853     | 0.00221459 |
| 259 | 16  | 89962125 | 89963362 | DEF8       | 0.166101       | 0.40434      | 0.0222475  |
| 260 | 16  | 89963443 | 89964169 | DEF8       | 0.181696       | 0.409797     | 0.0263163  |
| 261 | 16  | 90037399 | 90037761 | AC133919.1 | 0.0504559      | 0.309002     | 0.0262237  |
| 262 | 17  | 16002025 | 16002792 | TTC19      | 0.0294741      | 0.212111     | 0.00626937 |
| 263 | 17  | 18245660 | 18245743 | FLII       | 0.176181       | 0.364671     | 0.0170824  |
| 264 | 17  | 2041181  | 2041480  | DPH1       | 0.185395       | 0.355932     | 0.0487633  |
| 265 | 17  | 28342442 | 28344363 | TNFAIP1    | 0.043993       | 0.225369     | 0.00899708 |
| 266 | 17  | 28353316 | 28353694 | POLDIP2    | 0.0147033      | 0.134284     | 0.00105175 |
| 267 | 17  | 28396026 | 28396156 | SARM1      | 0.112754       | 0.42671      | 0.0369132  |
| 268 | 17  | 29082438 | 29086437 | MYO18A     | 0.0676064      | 0.310694     | 0.00364757 |
| 269 | 17  | 32487162 | 32487475 | CDK5R1     | 0.00934143     | 0.333333     | 0.0311419  |
| 270 | 17  | 34256339 | 34256721 | CCL2       | 1              | 0.110477     | 0.00975059 |
| 271 | 17  | 38498510 | 38498931 | ARHGAP23   | 0.0547422      | 0.280053     | 0.0388679  |
| 272 | 17  | 39658026 | 39658404 | STARD3     | 0.12439        | 0.33504      | 0.00066248 |
| 273 | 17  | 39989929 | 39990093 | PSMD3      | 0.103035       | 0.224354     | 0.0159379  |
| 274 | 17  | 40035349 | 40035721 | MED24      | 0.00976944     | 0.111382     | 0.0159246  |
| 275 | 17  | 40167948 | 40168202 | CASC3      | 0.142232       | 0.439359     | 0.00030035 |
| 276 | 17  | 41976770 | 41977260 | DNAJC7     | 0.245454       | 0.474033     | 8.47E-05   |
| 277 | 17  | 42569303 | 42569506 | MLX        | 0.1            | 0.395022     | 0.0327148  |
| 278 | 17  | 42582806 | 42583497 | FAM134C    | 0.00745885     | 0.253807     | 0.041477   |
| 279 | 17  | 42684229 | 42684990 | CNTNAP1    | 0.0722453      | 0.27349      | 0.00350455 |
| 280 | 17  | 42685420 | 42685956 | CNTNAP1    | 0.0384598      | 0.185399     | 0.0107278  |
| 281 | 17  | 42691511 | 42691805 | CNTNAP1    | 0.0559006      | 0.134388     | 0.0123657  |
| 282 | 17  | 43202712 | 43203680 | NBR1       | 0.0369339      | 0.156779     | 0.0357907  |
| 283 | 17  | 44853635 | 44854268 | EFTUD2     | 0.101802       | 0.283778     | 0.0457991  |
| 284 | 17  | 45103876 | 45104858 | NMT1       | 0.0379043      | 0.208266     | 0.00265777 |
| 285 | 17  | 46830918 | 46831447 | WNT3       | 0.0932755      | 0.408769     | 0.04096    |
| 286 | 17  | 4717276  | 4717684  | ARRB2      | 0.0512129      | 0.273553     | 0.0257892  |
| 287 | 17  | 4718023  | 4718260  | ARRB2      | 0.14455        | 0.267918     | 0.0477769  |
| 288 | 17  | 4718345  | 4718611  | ARRB2      | 0.0935832      | 0.280834     | 0.0015978  |
| 289 | 17  | 47619164 | 47619736 | NPEPPS     | 0.107594       | 0.298461     | 0.0389428  |
| 290 | 17  | 4886198  | 4886450  | MINK1      | 0.0433085      | 0.337227     | 4.29E-05   |
| 291 | 17  | 48910880 | 48912833 | UBE2Z      | 0.0495626      | 0.194499     | 0.0282903  |
| 292 | 17  | 4894093  | 4894173  | MINK1      | 0.0583756      | 0.205047     | 0.011458   |
| 293 | 17  | 4894311  | 4894524  | MINK1      | 0.0964621      | 0.284682     | 0.00205163 |

| S/N | Chr | Start    | End      | Gene        | IR ratio-Young | IR ratio-Old | p-value    |
|-----|-----|----------|----------|-------------|----------------|--------------|------------|
| 294 | 17  | 4938975  | 4939059  | SLC25A11    | 0.0326296      | 0.146205     | 0.00921303 |
| 295 | 17  | 4969337  | 4969499  | CAMTA2      | 0.0136986      | 0.158117     | 0.00256176 |
| 296 | 17  | 5377305  | 5378176  | RABEP1      | 0.151067       | 0.765836     | 0.0303646  |
| 297 | 17  | 58005600 | 58005800 | SRSF1       | 0.222307       | 0.553398     | 0.00109955 |
| 298 | 17  | 58310751 | 58310835 | TSPOAP1     | 0.147952       | 0.397129     | 0.00964405 |
| 299 | 17  | 63824411 | 63824636 | FTSJ3       | 0.00830258     | 0.536        | 0.0104166  |
| 300 | 17  | 7222302  | 7222666  | ACADVL      | 0.720588       | 0.522695     | 0.00270742 |
| 301 | 17  | 74249080 | 74249343 | TTYH2       | 0.107501       | 0.282441     | 0.0352238  |
| 302 | 17  | 74958478 | 74958672 | HID1        | 0.262401       | 0.467506     | 0.0315542  |
| 303 | 17  | 75492789 | 75492928 | TMEM94      | 0.268629       | 0.0605613    | 0.0123927  |
| 304 | 17  | 75703859 | 75704755 | SAP30BP     | 0.0138622      | 0.100621     | 0.0466295  |
| 305 | 17  | 7578244  | 7578341  | EIF4A1      | 0.0615779      | 0.137766     | 0.00558139 |
| 306 | 17  | 76391613 | 76391755 | UBE2O       | 0.0281414      | 0.179558     | 0.0162568  |
| 307 | 17  | 7909338  | 7910427  | CHD3        | 0.162439       | 0.317517     | 0.0183912  |
| 308 | 17  | 80358479 | 80360060 | RNF213      | 0.640752       | 0.118868     | 0.023195   |
| 309 | 17  | 81690234 | 81690673 | HGS         | 0.0270708      | 0.18887      | 0.00452703 |
| 310 | 17  | 81690742 | 81691446 | HGS         | 0.0278871      | 0.240718     | 0.00255648 |
| 311 | 17  | 81694853 | 81694923 | HGS         | 0.0128946      | 0.207485     | 0.00117896 |
| 312 | 17  | 82478918 | 82481081 | NARF        | 0.0361515      | 0.162749     | 0.0274273  |
| 313 | 17  | 82716896 | 82718905 | FN3KRP      | 0.093244       | 0.314015     | 0.0356175  |
| 314 | 17  | 82907821 | 82909284 | TBCD        | 0.0494846      | 0.194114     | 0.0303228  |
| 315 | 19  | 10110866 | 10110944 | PPAN-P2RY11 | 0.117647       | 0.0101892    | 0.0473209  |
| 316 | 19  | 1011195  | 1011366  | TMEM259     | 0.146558       | 0.241905     | 0.0301279  |
| 317 | 19  | 10149968 | 10151397 | DNMT1       | 0.0367102      | 0.262953     | 0.042875   |
| 318 | 19  | 10258522 | 10258608 | MRPL4       | 0.199524       | 0.460091     | 0.00972702 |
| 319 | 19  | 10395343 | 10395434 | CDC37       | 0.192624       | 0.318257     | 0.00127335 |
| 320 | 19  | 11378595 | 11378690 | EPOR        | 0.569672       | 0.10596      | 0.0081368  |
| 321 | 19  | 12679543 | 12679622 | DHPS        | 0.0163934      | 0.130419     | 0.00963671 |
| 322 | 19  | 12701672 | 12701751 | TNPO2       | 0.0395452      | 0.159        | 0.0164134  |
| 323 | 19  | 12948813 | 12949080 | RAD23A      | 0.112725       | 0.359652     | 0.012882   |
| 324 | 19  | 1366381  | 1367159  | MUM1        | 0.010342       | 0.183821     | 0.00702556 |
| 325 | 19  | 1367220  | 1369264  | MUM1        | 0.0181021      | 0.175977     | 0.0408947  |
| 326 | 19  | 1383942  | 1387810  | NDUFS7      | 0.0249706      | 0.172888     | 0.00587342 |
| 327 | 19  | 14159773 | 14160111 | ADGRL1      | 0.0084507      | 0.102804     | 0.0244705  |
| 328 | 19  | 1422396  | 1425877  | DAZAP1      | 0.193028       | 0.54566      | 0.0070872  |
| 329 | 19  | 1425960  | 1428841  | DAZAP1      | 0.16042        | 0.545123     | 0.00510745 |
| 330 | 19  | 16519715 | 16520148 | CHERP       | 0.134128       | 0.342871     | 0.0406016  |
| 331 | 19  | 17210380 | 17210714 | MYO9B       | 0.140141       | 0.481291     | 0.0247353  |
| 332 | 19  | 18122751 | 18123216 | MAST3       | 0.0372493      | 0.138519     | 0.0158381  |
| 333 | 19  | 18436877 | 18436972 | ISYNA1      | 0.179229       | 0.588235     | 0.0286865  |
| 334 | 19  | 18618272 | 18618374 | TMEM59L     | 0.0713909      | 0.153652     | 1.20E-05   |
| 335 | 19  | 19055928 | 19057415 | ARMC6       | 0.0956362      | 0.369094     | 0.0352068  |
| 336 | 19  | 19656916 | 19656993 | ATP13A1     | 0.177986       | 0.591793     | 0.0369191  |
| 337 | 19  | 1978511  | 1978601  | CSNK1G2     | 0.030303       | 0.201597     | 0.0288346  |
| 338 | 19  | 2111332  | 2111678  | AP3D1       | 0.0321168      | 0.162774     | 0.0213329  |
| 339 | 19  | 2225452  | 2226182  | DOT1L       | 0.0591925      | 0.636134     | 0.0357628  |
| 340 | 19  | 2476630  | 2477028  | GADD45B     | 0.0617064      | 0.300757     | 0.0132812  |
| 341 | 19  | 2757782  | 2759256  | SGTA        | 0.0278746      | 0.191682     | 0.00172645 |
| 342 | 19  | 35126775 | 35126852 | LGI4        | 0.0434783      | 0.221902     | 0.0456794  |

| S/N | Chr | Start     | End       | Gene        | IR ratio-Young | IR ratio-Old | p-value    |
|-----|-----|-----------|-----------|-------------|----------------|--------------|------------|
| 343 | 19  | 35131555  | 35131788  | LGI4        | 0.00623886     | 0.117975     | 0.001117   |
| 344 | 19  | 35752999  | 35753086  | LIN37       | 0.271812       | 0.0344828    | 0.0177904  |
| 345 | 19  | 38217591  | 38217797  | DPF1        | 0.0457934      | 0.167389     | 0.0401406  |
| 346 | 19  | 38307521  | 38307596  | YIF1B       | 0.0292135      | 0.163622     | 0.00747199 |
| 347 | 19  | 38711361  | 38714468  | ACTN4       | 0.0533577      | 0.152489     | 0.0135612  |
| 348 | 19  | 38918008  | 38918093  | CTC-360G5.8 | 0.120567       | 0.477528     | 0.00785794 |
| 349 | 19  | 39980146  | 39980285  | PSMC4       | 0.0772255      | 0.253521     | 0.00567267 |
| 350 | 19  | 40238973  | 40240044  | AKT2        | 0.295467       | 0.631763     | 0.00363026 |
| 351 | 19  | 40554646  | 40556083  | SPTBN4      | 0.136247       | 0.376928     | 0.0137471  |
| 352 | 19  | 40578212  | 40578461  | SHKBP1      | 0.158606       | 0.484054     | 0.0413018  |
| 353 | 19  | 42294735  | 42294823  | CIC         | 0.0238095      | 0.144957     | 0.0288843  |
| 354 | 19  | 42316561  | 42316661  | TMEM145     | 0.0446001      | 0.155505     | 0.0154448  |
| 355 | 19  | 4310596   | 4311841   | FSD1        | 0.202776       | 0.456294     | 0.0110802  |
| 356 | 19  | 436431    | 436629    | SHC2        | 0.294686       | 0.46963      | 0.0231478  |
| 357 | 19  | 49114967  | 49115259  | LIN7B       | 0.013296       | 0.124947     | 0.0479763  |
| 358 | 19  | 49447908  | 49448000  | PIH1D1      | 0.0448296      | 0.198953     | 0.0124926  |
| 359 | 19  | 49686726  | 49688161  | PRMT1       | 0.070527       | 0.190075     | 0.00739252 |
| 360 | 19  | 49802141  | 49802533  | AP2A1       | 0.0576923      | 0.184932     | 0.0202666  |
| 361 | 19  | 49855077  | 49856974  | PTOV1       | 0.15409        | 0.34205      | 0.00017129 |
| 362 | 19  | 49857130  | 49857692  | PTOV1       | 0.0607453      | 0.133223     | 0.0160595  |
| 363 | 19  | 49861365  | 49861448  | PNKP        | 0.283967       | 0.0778032    | 0.0324206  |
| 364 | 19  | 5239063   | 5240198   | AC005338.1  | 0.0114945      | 0.150792     | 0.0250667  |
| 365 | 19  | 54143749  | 54144005  | CNOT3       | 0.0113301      | 0.161017     | 0.0280078  |
| 366 | 19  | 54436171  | 54436332  | TTYH1       | 0.0594311      | 0.120105     | 0.0112937  |
| 367 | 19  | 55304110  | 55304550  | BRSK1       | 0.0536585      | 0.211297     | 0.00096891 |
| 368 | 19  | 58548776  | 58548861  | TRIM28      | 0.14606        | 0.295855     | 0.0449977  |
| 369 | 19  | 58549650  | 58549736  | TRIM28      | 0.0315977      | 0.142497     | 0.009126   |
| 370 | 19  | 614016    | 615794    | HCN2        | 0.076804       | 0.201993     | 0.0183536  |
| 371 | 19  | 7527628   | 7527863   | MCOLN1      | 0.129958       | 0.427313     | 0.0274578  |
| 372 | 19  | 7627851   | 7628149   | XAB2        | 0.0180702      | 0.260474     | 0.0133701  |
| 373 | 19  | 8255879   | 8256235   | CERS4       | 0.024          | 0.253689     | 0.0002724  |
| 374 | 19  | 877180    | 879936    | MED16       | 0.158986       | 0.557341     | 0.0134091  |
| 375 | 19  | 990364    | 990851    | WDR18       | 0.183761       | 0.503779     | 0.0424213  |
| 376 | 2   | 101269136 | 101269215 | CNOT11      | 0.00986547     | 0.235659     | 0.037656   |
| 377 | 2   | 127050912 | 127051153 | BIN1        | 0.0719368      | 0.256254     | 1.84E-05   |
| 378 | 2   | 127052362 | 127053421 | BIN1        | 0.173368       | 0.472114     | 0.00010386 |
| 379 | 2   | 127289501 | 127289688 | ERCC3       | 0.112546       | 0.312743     | 0.0338333  |
| 380 | 2   | 127289824 | 127290223 | ERCC3       | 0.272356       | 0.596689     | 0.00957386 |
| 381 | 2   | 130372483 | 130372872 | PTPN18      | 0.280339       | 0.0534521    | 0.0321042  |
| 382 | 2   | 131041462 | 131041814 | ARHGEF4     | 0.209145       | 0.561997     | 7.12E-06   |
| 383 | 2   | 131045446 | 131046037 | ARHGEF4     | 0.0749096      | 0.363588     | 2.23E-08   |
| 384 | 2   | 131518708 | 131519049 | AC093838.4  | 0.180025       | 0.542326     | 0.0281253  |
| 385 | 2   | 169139371 | 169139542 | LRP2        | 0.2            | 0.0154912    | 0.0204082  |
| 386 | 2   | 169806892 | 169806970 | SSB         | 0.0205761      | 0.266667     | 0.0370225  |
| 387 | 2   | 177216188 | 177216502 | HNRNPA3     | 0.0288049      | 0.10835      | 0.0212076  |
| 388 | 2   | 186504214 | 186505450 | ZC3H15      | 0.0124438      | 0.121286     | 0.0296539  |
| 389 | 2   | 197494250 | 197494656 | HSPD1       | 0.0345953      | 0.136492     | 0.0348361  |
| 390 | 2   | 201704218 | 201704453 | ALS2        | 0.0136986      | 0.147811     | 0.0203634  |
| 391 | 2   | 218340141 | 218340727 | PNKD        | 0.093288       | 0.35322      | 0.0360215  |

| S/N | Chr | Start     | End       | Gene     | IR ratio-Young | IR ratio-Old | p-value    |
|-----|-----|-----------|-----------|----------|----------------|--------------|------------|
| 392 | 2   | 218812749 | 218812923 | CYP27A1  | 0.126273       | 0.0322151    | 0.0441813  |
| 393 | 2   | 219208348 | 219208425 | ZFAND2B  | 0.0873239      | 0.223136     | 0.0452394  |
| 394 | 2   | 219233943 | 219234132 | ANKZF1   | 0.358524       | 0.119742     | 0.0223437  |
| 395 | 2   | 219299384 | 219299699 | PTPRN    | 0.0521176      | 0.1393       | 0.00545905 |
| 396 | 2   | 219556292 | 219556453 | OBSL1    | 0.025641       | 0.147937     | 0.0315528  |
| 397 | 2   | 219612058 | 219613127 | STK11IP  | 0.0613958      | 0.283305     | 0.0351563  |
| 398 | 2   | 219633009 | 219633273 | SLC4A3   | 0.104906       | 0.0110901    | 0.0455296  |
| 399 | 2   | 219633457 | 219633879 | SLC4A3   | 0.0867003      | 0.278295     | 0.0355535  |
| 400 | 2   | 229771632 | 229774096 | TRIP12   | 0.0125412      | 0.118373     | 0.0479921  |
| 401 | 2   | 232566981 | 232567077 | EIF4E2   | 0.00370714     | 0.138756     | 0.0341145  |
| 402 | 2   | 241499414 | 241500172 | STK25    | 0.227577       | 0.374602     | 0.0183588  |
| 403 | 2   | 241671405 | 241672190 | ATG4B    | 0.306306       | 0.600371     | 0.00338231 |
| 404 | 2   | 25136598  | 25137340  | EFR3B    | 0.0723926      | 0.318568     | 0.0439158  |
| 405 | 2   | 27039837  | 27040029  | TMEM214  | 0.0333333      | 0.330317     | 0.00685871 |
| 406 | 2   | 27200579  | 27200997  | SLC5A6   | 0.0321721      | 0.200585     | 0.0310968  |
| 407 | 2   | 27434762  | 27435132  | NRBP1    | 0.0458588      | 0.183475     | 0.0141701  |
| 408 | 2   | 38296590  | 38296685  | ATL2     | 0.223301       | 0.593023     | 0.0386147  |
| 409 | 2   | 53865573  | 53866084  | PSME4    | 0.0106865      | 0.224338     | 0.00189416 |
| 410 | 2   | 61189069  | 61190270  | USP34    | 0.184555       | 0.359183     | 0.0281668  |
| 411 | 2   | 74365241  | 74365514  | DCTN1    | 0.0854701      | 0.220401     | 0.00121183 |
| 412 | 2   | 74368131  | 74368727  | DCTN1    | 0.0440996      | 0.108073     | 0.0194173  |
| 413 | 2   | 74425491  | 74425569  | WDR54    | 0.0327724      | 0.151515     | 0.0289261  |
| 414 | 2   | 74527838  | 74527939  | AUP1     | 0.0881971      | 0.173221     | 0.0469728  |
| 415 | 2   | 8682906   | 8683684   | ID2      | 0.103976       | 0.199739     | 0.0210218  |
| 416 | 2   | 96268658  | 96269267  | CIAO1    | 0.146109       | 0.298614     | 0.0362054  |
| 417 | 2   | 97656960  | 97657151  | ACTR1B   | 0.0693663      | 0.537211     | 6.84E-11   |
| 418 | 2   | 97658643  | 97658878  | ACTR1B   | 0.201339       | 0.476216     | 6.39E-06   |
| 419 | 20  | 2659793   | 2660029   | IDH3B    | 0.136854       | 0.222334     | 0.0459573  |
| 420 | 20  | 2660365   | 2660456   | IDH3B    | 0.083809       | 0.174421     | 0.025752   |
| 421 | 20  | 2864287   | 2864364   | PTPRA    | 0.0121637      | 0.152174     | 0.0067     |
| 422 | 20  | 31945889  | 31946495  | PDRG1    | 0.0163664      | 0.152131     | 0.0381189  |
| 423 | 20  | 32703458  | 32704022  | COMMD7   | 0.108683       | 0.284392     | 0.0288964  |
| 424 | 20  | 33439026  | 33443310  | SNTA1    | 0.00958825     | 0.110745     | 0.0495948  |
| 425 | 20  | 34921139  | 34921329  | ACSS2    | 0.114912       | 0.44294      | 0.0115851  |
| 426 | 20  | 34989919  | 34990013  | MYH7B    | 1              | 0.221374     | 0.0344048  |
| 427 | 20  | 35007640  | 35008663  | TRPC4AP  | 0.0211771      | 0.10561      | 0.0360689  |
| 428 | 20  | 35631034  | 35631113  | CPNE1    | 0.0412075      | 0.136295     | 0.0369903  |
| 429 | 20  | 3673911   | 3674063   | ADAM33   | 0.0345188      | 0.356449     | 0.0254804  |
| 430 | 20  | 3934201   | 3934993   | RNF24    | 0.00875778     | 0.2          | 0.0342936  |
| 431 | 20  | 41163275  | 41163377  | PLCG1    | 0.115593       | 0.399297     | 0.00911302 |
| 432 | 20  | 41170269  | 41172192  | PLCG1    | 0.024869       | 0.160751     | 0.0173848  |
| 433 | 20  | 45897806  | 45898004  | CTSA     | 0.181755       | 0.336216     | 0.00914175 |
| 434 | 20  | 46035042  | 46035403  | SLC12A5  | 0.0191835      | 0.100654     | 0.0330331  |
| 435 | 20  | 46356637  | 46357622  | SLC35C2  | 0.0695113      | 0.382995     | 0.00108543 |
| 436 | 20  | 59037280  | 59038465  | PRELID3B | 0.0243353      | 0.218552     | 0.0270336  |
| 437 | 20  | 5941139   | 5941242   | TRMT6    | 0.00738916     | 0.107394     | 0.0489691  |
| 438 | 20  | 62333243  | 62333374  | LAMA5    | 0.620155       | 0.0938834    | 0.019073   |
| 439 | 20  | 62941620  | 62942986  | GID8     | 0.0460506      | 0.249008     | 0.0365176  |
| 440 | 20  | 63678346  | 63679848  | RTEL1    | 0.0148202      | 0.1555       | 0.0242565  |

| S/N | Chr | Start     | End       | Gene    | IR ratio-Young | IR ratio-Old | p-value    |
|-----|-----|-----------|-----------|---------|----------------|--------------|------------|
| 441 | 21  | 29043599  | 29046666  | USP16   | 0.0913205      | 0.750561     | 0.015625   |
| 442 | 21  | 38814981  | 38817007  | ETS2    | 0.0171748      | 0.101047     | 0.0171092  |
| 443 | 21  | 44314021  | 44316243  | PFKL    | 0.0706194      | 0.238111     | 0.00644794 |
| 444 | 21  | 44324917  | 44325152  | PFKL    | 0.0389439      | 0.131401     | 0.01497    |
| 445 | 21  | 44325264  | 44325960  | PFKL    | 0.0444989      | 0.161992     | 0.00828163 |
| 446 | 21  | 46195756  | 46196201  | LSS     | 0.0559676      | 0.288939     | 0.0105901  |
| 447 | 22  | 18910272  | 18910887  | DGCR6   | 0.0748364      | 0.35905      | 0.00868347 |
| 448 | 22  | 20113007  | 20113117  | TRMT2A  | 0.0196078      | 0.164867     | 0.0422608  |
| 449 | 22  | 20139892  | 20140114  | ZDHHC8  | 0.173935       | 0.365207     | 0.0451989  |
| 450 | 22  | 20141012  | 20141216  | ZDHHC8  | 0.0688202      | 0.277778     | 0.0357009  |
| 451 | 22  | 20400758  | 20401276  | ZNF74   | 0.0404533      | 1            | 0.0145773  |
| 452 | 22  | 21025898  | 21026010  | P2RX6   | 0.439065       | 0.125        | 0.0403612  |
| 453 | 22  | 21703882  | 21710627  | YPEL1   | 0.0158577      | 0.107056     | 0.0449492  |
| 454 | 22  | 26465551  | 26466225  | HPS4    | 0.237692       | 0.60445      | 0.0374027  |
| 455 | 22  | 28796192  | 28797076  | XBP1    | 0.0207283      | 0.21875      | 0.0480841  |
| 456 | 22  | 30887618  | 30888222  | OSBP2   | 0.00865969     | 0.333333     | 0.0351562  |
| 457 | 22  | 38073823  | 38074306  | PICK1   | 0.372905       | 0.719118     | 0.0042115  |
| 458 | 22  | 40423685  | 40424205  | MKL1    | 0.0265406      | 0.261872     | 0.0452675  |
| 459 | 22  | 41224801  | 41224966  | L3MBTL2 | 0.0179514      | 0.262397     | 0.00646659 |
| 460 | 22  | 41225071  | 41225793  | L3MBTL2 | 0.0122163      | 0.10846      | 0.0250221  |
| 461 | 22  | 41584058  | 41584280  | PMM1    | 0.060241       | 0.150765     | 0.0336884  |
| 462 | 22  | 46355588  | 46355989  | TRMU    | 0.128642       | 0.468418     | 0.00312764 |
| 463 | 22  | 46356072  | 46356841  | TRMU    | 0.136984       | 0.466395     | 0.0278038  |
| 464 | 22  | 50245827  | 50245909  | HDAC10  | 0.0544413      | 0.23951      | 0.0419856  |
| 465 | 22  | 50265660  | 50266225  | MAPK11  | 0.361165       | 0.604772     | 0.022102   |
| 466 | 22  | 50266305  | 50266539  | MAPK11  | 0.0996999      | 0.201044     | 0.0393909  |
| 467 | 22  | 50441026  | 50443865  | PPP6R2  | 0.213731       | 0.772065     | 0.00031746 |
| 468 | 22  | 50459392  | 50459469  | SBF1    | 0.0882579      | 0.220365     | 0.0394526  |
| 469 | 22  | 50459666  | 50459951  | SBF1    | 0.0854998      | 0.294031     | 0.00442783 |
| 470 | 22  | 50574419  | 50574492  | CPT1B   | 0.262295       | 0.0512821    | 0.0276847  |
| 471 | 22  | 50581553  | 50581748  | CHKB    | 0.460575       | 0.759475     | 0.0296398  |
| 472 | 22  | 50626760  | 50626833  | ARSA    | 0.397942       | 0.728328     | 0.0180606  |
| 473 | 3   | 127017892 | 127018293 | PLXNA1  | 0.00958445     | 0.146739     | 0.0146878  |
| 474 | 3   | 127029536 | 127029873 | PLXNA1  | 0.0771822      | 0.237263     | 0.0432643  |
| 475 | 3   | 12908525  | 12909272  | IQSEC1  | 0.031669       | 0.101432     | 0.0404641  |
| 476 | 3   | 13323432  | 13325794  | NUP210  | 0.046963       | 0.530409     | 0.0233236  |
| 477 | 3   | 133777238 | 133778585 | TF      | 0.191044       | 0.279945     | 0.00923342 |
| 478 | 3   | 184143142 | 184143441 | EIF2B5  | 0.34013        | 0.693637     | 0.00172216 |
| 479 | 3   | 184164931 | 184165112 | DVL3    | 0.168675       | 0.404005     | 0.0477703  |
| 480 | 3   | 184381624 | 184381715 | CHRD    | 0.025641       | 0.147601     | 0.0368061  |
| 481 | 3   | 37065942  | 37066223  | LRRFIP2 | 0.182208       | 0.471871     | 0.0382875  |
| 482 | 3   | 38251471  | 38252327  | OXSR1   | 0.0281447      | 0.527778     | 0.0109739  |
| 483 | 3   | 38252392  | 38252816  | OXSR1   | 0.0192605      | 0.247166     | 0.0116219  |
| 484 | 3   | 46672201  | 46673338  | ALS2CL  | 0.327613       | 0.0491093    | 0.0429688  |
| 485 | 3   | 47406750  | 47407129  | PTPN23  | 0.15373        | 0.522627     | 0.0369903  |
| 486 | 3   | 48412009  | 48412237  | PLXNB1  | 0.0597377      | 0.225404     | 0.0411379  |
| 487 | 3   | 48628038  | 48628433  | SLC26A6 | 0.676856       | 0.211568     | 0.0489273  |
| 488 | 3   | 48678969  | 48679054  | NCKIPSD | 0.0659971      | 0.177598     | 0.0188111  |
| 489 | 3   | 49014116  | 49014209  | WDR6    | 0.508993       | 0.722672     | 0.0256911  |

| S/N | Chr | Start     | End       | Gene     | IR ratio-Young | IR ratio-Old | p-value    |
|-----|-----|-----------|-----------|----------|----------------|--------------|------------|
| 490 | 3   | 49015707  | 49015803  | DALRD3   | 0.719098       | 0.934471     | 0.00168462 |
| 491 | 3   | 49024404  | 49024494  | IMPDH2   | 0.0245195      | 0.135854     | 0.0248231  |
| 492 | 3   | 49098692  | 49098884  | QARS     | 0.189452       | 0.476935     | 0.0193145  |
| 493 | 3   | 49114093  | 49114173  | USP19    | 0.0222222      | 0.150289     | 0.0244869  |
| 494 | 3   | 49116607  | 49116726  | USP19    | 0.105012       | 0.414062     | 0.012253   |
| 495 | 3   | 49123373  | 49123446  | LAMB2    | 0.463068       | 0.129032     | 0.0294076  |
| 496 | 3   | 49125169  | 49125252  | LAMB2    | 0.409524       | 0.0183374    | 0.0459184  |
| 497 | 3   | 49129324  | 49129603  | LAMB2    | 0.141732       | 0.642388     | 0.0355124  |
| 498 | 3   | 49674413  | 49674488  | APEH     | 0.010084       | 0.333333     | 0.018595   |
| 499 | 3   | 49679644  | 49680540  | APEH     | 0.0368879      | 0.127678     | 0.0340371  |
| 500 | 3   | 49860852  | 49860942  | CAMKV    | 0.117664       | 0.27572      | 0.00208331 |
| 501 | 3   | 49861577  | 49861790  | CAMKV    | 0.104386       | 0.178053     | 0.0346145  |
| 502 | 3   | 50364806  | 50364887  | CACNA2D2 | 0.0733083      | 0.379679     | 0.0243861  |
| 503 | 3   | 50366338  | 50366577  | CACNA2D2 | 0.0675134      | 0.349237     | 0.0423057  |
| 504 | 3   | 50366625  | 50366830  | CACNA2D2 | 0.142857       | 0.548088     | 0.0437436  |
| 505 | 3   | 50367902  | 50368137  | CACNA2D2 | 0.0454545      | 0.371166     | 0.0118542  |
| 506 | 3   | 51275206  | 51277607  | DOCK3    | 0.0411096      | 0.277327     | 0.0276502  |
| 507 | 3   | 51277754  | 51280105  | DOCK3    | 0.0042172      | 0.220819     | 0.00666389 |
| 508 | 3   | 52504876  | 52505002  | STAB1    | 1              | 0.146919     | 0.01585    |
| 509 | 3   | 53185700  | 53185926  | PRKCD    | 0.0116929      | 0.111111     | 0.04       |
| 510 | 3   | 58285139  | 58285352  | ABHD6    | 0.0373324      | 0.170518     | 0.0345831  |
| 511 | 3   | 72378637  | 72379039  | RYBP     | 0.0148003      | 0.139486     | 0.0366364  |
| 512 | 3   | 9842082   | 9842198   | RPUSD3   | 0.117647       | 0.323572     | 0.0408477  |
| 513 | 4   | 113237172 | 113237598 | ANK2     | 0.00725468     | 0.166483     | 0.0285279  |
| 514 | 4   | 143540495 | 143543508 | SMARCA5  | 0.0279587      | 0.213772     | 0.0474272  |
| 515 | 4   | 153322816 | 153324077 | TRIM2    | 0.041438       | 0.183401     | 0.0418379  |
| 516 | 4   | 157335877 | 157336376 | GRIA2    | 0.0594571      | 0.163966     | 0.00630074 |
| 517 | 4   | 186197130 | 186197532 | CYP4V2   | 1              | 0.250216     | 0.0242801  |
| 518 | 4   | 25392421  | 25393804  | ANAPC4   | 0.607303       | 0.131275     | 0.048769   |
| 519 | 4   | 55417247  | 55417802  | TMEM165  | 0.173585       | 0.428921     | 0.0492603  |
| 520 | 4   | 55424643  | 55425375  | TMEM165  | 0.0306261      | 0.143668     | 0.033854   |
| 521 | 4   | 679033    | 679913    | MYL5     | 0.0145648      | 0.211211     | 0.0354672  |
| 522 | 4   | 76100824  | 76100989  | ART3     | 0.1936         | 0.0166945    | 0.0410021  |
| 523 | 4   | 78595437  | 78595793  | ANXA3    | 1              | 0.144737     | 0.013545   |
| 524 | 4   | 80196601  | 80196962  | PRDM8    | 0.0416382      | 0.337639     | 0.0476895  |
| 525 | 4   | 99949386  | 99949662  | H2AFZ    | 0.0352253      | 0.130029     | 0.000175   |
| 526 | 5   | 126488892 | 126492914 | GRAMD3   | 0.142847       | 0.510126     | 0.0355402  |
| 527 | 5   | 140561701 | 140561843 | APBB3    | 0.460402       | 0.713886     | 0.0181584  |
| 528 | 5   | 140563915 | 140564196 | APBB3    | 0.157736       | 0.423398     | 0.00795338 |
| 529 | 5   | 140677753 | 140677907 | HARS     | 0.0498076      | 0.135142     | 0.010759   |
| 530 | 5   | 141529273 | 141529602 | DIAPH1   | 0.122449       | 0.509195     | 0.0457558  |
| 531 | 5   | 141639649 | 141639919 | RELL2    | 0.0936819      | 0.246698     | 0.0244595  |
| 532 | 5   | 141640295 | 141640411 | RELL2    | 0.0833333      | 0.227166     | 0.0294641  |
| 533 | 5   | 141643088 | 141644217 | FCHSD1   | 0.432577       | 0.0761985    | 0.0182961  |
| 534 | 5   | 141645148 | 141645770 | FCHSD1   | 0.272189       | 0.00578739   | 0.04       |
| 535 | 5   | 146144349 | 146144471 | LARS     | 0.0335037      | 0.170424     | 0.035327   |
| 536 | 5   | 14711310  | 14712873  | ANKH     | 0.0785866      | 0.252237     | 0.0190471  |
| 537 | 5   | 1479675   | 1480941   | LPCAT1   | 0.01865        | 0.147601     | 0.0470893  |
| 538 | 5   | 149251419 | 149252200 | ABLM3    | 0.0167108      | 0.21828      | 0.0197754  |

| S/N | Chr | Start     | End       | Gene      | IR ratio-Young | IR ratio-Old | p-value    |
|-----|-----|-----------|-----------|-----------|----------------|--------------|------------|
| 539 | 5   | 173608292 | 173609237 | BOD1      | 0.0115962      | 0.132889     | 0.0252576  |
| 540 | 5   | 176529090 | 176529287 | RNF44     | 0.0528129      | 0.22292      | 0.0116532  |
| 541 | 5   | 177302178 | 177302396 | RAB24     | 0.357292       | 0.580514     | 0.00867762 |
| 542 | 5   | 179621397 | 179623036 | HNRNPH1   | 0.134593       | 0.236272     | 0.0477743  |
| 543 | 5   | 179798434 | 179798512 | MGAT4B    | 0.00120919     | 0.275        | 0.00018153 |
| 544 | 5   | 58458171  | 58458398  | PLK2      | 0.0650906      | 0.290464     | 0.017866   |
| 545 | 5   | 73554986  | 73555487  | ANKRA2    | 0.102408       | 0.343564     | 0.0304773  |
| 546 | 6   | 131596163 | 131596517 | MED23     | 0.0165407      | 0.348442     | 0.0174851  |
| 547 | 6   | 13615624  | 13615711  | NOL7      | 0.226611       | 0.0518617    | 0.04096    |
| 548 | 6   | 136344238 | 136345855 | MAP7      | 0.059879       | 0.418167     | 0.00161432 |
| 549 | 6   | 158066635 | 158068646 | SYNJ2     | 0.0226939      | 0.265029     | 0.021883   |
| 550 | 6   | 29627646  | 29629086  | GABBR1    | 0.239251       | 0.645416     | 0.00236182 |
| 551 | 6   | 29629107  | 29630457  | GABBR1    | 0.187901       | 0.605283     | 0.00146753 |
| 552 | 6   | 29670721  | 29671171  | MOG       | 0.294372       | 0.556659     | 0.00015603 |
| 553 | 6   | 30741333  | 30741613  | FLOT1     | 0.152431       | 0.295737     | 0.00112594 |
| 554 | 6   | 30913157  | 30913308  | GTF2H4    | 0.157792       | 0.337817     | 0.0270775  |
| 555 | 6   | 31143134  | 31143261  | CCHCR1    | 0.0909091      | 0.476031     | 0.0484541  |
| 556 | 6   | 31625871  | 31626019  | PRRC2A    | 0.0357143      | 0.220418     | 0.027862   |
| 557 | 6   | 31640306  | 31640384  | BAG6      | 0.00273428     | 0.11074      | 0.00513528 |
| 558 | 6   | 31760216  | 31760689  | MSH5      | 1              | 0.218227     | 0.0327738  |
| 559 | 6   | 31950147  | 31950285  | CFB       | 1              | 0.0290049    | 0.00801866 |
| 560 | 6   | 31963559  | 31963636  | SKIV2L    | 0.117647       | 0.00509122   | 0.0349411  |
| 561 | 6   | 32191503  | 32191708  | GPSM3     | 0.501577       | 0.018621     | 0.0233236  |
| 562 | 6   | 32977570  | 32977756  | BRD2      | 0.0302741      | 0.116564     | 0.0128132  |
| 563 | 6   | 33205539  | 33205639  | HSD17B8   | 0.0714286      | 0.389831     | 0.0491881  |
| 564 | 6   | 33264497  | 33264781  | VPS52     | 0.275885       | 0.647558     | 0.00024348 |
| 565 | 6   | 33442494  | 33442888  | SYNGAP1   | 0.0144928      | 0.177486     | 0.00185307 |
| 566 | 6   | 34247492  | 34247680  | C6orf1    | 0.0282209      | 0.146322     | 0.0189242  |
| 567 | 6   | 36798494  | 36799966  | CPNE5     | 0.0232847      | 0.108196     | 0.0420121  |
| 568 | 6   | 43259706  | 43262788  | TTBK1     | 0.121894       | 0.410215     | 0.0403612  |
| 569 | 6   | 43503508  | 43503622  | TJAP1     | 0.133333       | 0.0277778    | 0.0389118  |
| 570 | 6   | 43521048  | 43521181  | POLR1C    | 0.0555556      | 0.292369     | 0.048282   |
| 571 | 6   | 53092824  | 53093465  | FBXO9     | 0.0372668      | 0.238146     | 3.64E-06   |
| 572 | 7   | 100106003 | 100106240 | AP4M1     | 0.331865       | 0.746165     | 0.0330983  |
| 573 | 7   | 100110073 | 100110199 | TAF6      | 0.057903       | 0.167025     | 0.0326253  |
| 574 | 7   | 100222720 | 100223569 | GATS      | 0.0305297      | 0.133469     | 0.00646973 |
| 575 | 7   | 100575304 | 100575704 | LRCH4     | 0.340659       | 0.588649     | 0.0498306  |
| 576 | 7   | 100683230 | 100683303 | GIGYF1    | 0.0251451      | 0.203204     | 0.0449795  |
| 577 | 7   | 100888383 | 100888473 | SRRT      | 0.0415973      | 0.124698     | 0.0391285  |
| 578 | 7   | 103312131 | 103312206 | PMPCB     | 0.158442       | 0.658791     | 0.00065252 |
| 579 | 7   | 128324694 | 128325817 | RBM28     | 0.118896       | 0.718911     | 0.00419021 |
| 580 | 7   | 128394599 | 128394888 | IMPDH1    | 0.0170592      | 0.271215     | 0.012419   |
| 581 | 7   | 1438220   | 1438288   | MICALL2   | 0.501299       | 0.186701     | 0.0132999  |
| 582 | 7   | 148799388 | 148800501 | CUL1      | 0.016497       | 0.102256     | 0.0217263  |
| 583 | 7   | 151077780 | 151077878 | FASTK     | 0.0860174      | 0.191454     | 0.0368178  |
| 584 | 7   | 26190460  | 26190992  | HNRNPA2B1 | 0.176634       | 0.265721     | 0.0485664  |
| 585 | 7   | 44761593  | 44761694  | ZMIZ2     | 0.0990869      | 0.30975      | 0.00161163 |
| 586 | 7   | 99047882  | 99049562  | SMURF1    | 0.0114475      | 0.622901     | 0.00462963 |
| 587 | 8   | 143379078 | 143379314 | RHPN1     | 0.0265871      | 0.170914     | 0.0228147  |

| S/N | Chr | Start     | End       | Gene     | IR ratio-Young | IR ratio-Old | p-value    |
|-----|-----|-----------|-----------|----------|----------------|--------------|------------|
| 588 | 8   | 143380783 | 143381267 | RHPN1    | 0.111339       | 0.26097      | 0.0335394  |
| 589 | 8   | 143811345 | 143812265 | SCRIB    | 0.0714286      | 0.265416     | 0.0495688  |
| 590 | 8   | 143835730 | 143835819 | NRBP2    | 0.235741       | 0.390635     | 0.0265539  |
| 591 | 8   | 143836030 | 143836126 | NRBP2    | 0.0493465      | 0.128251     | 0.018522   |
| 592 | 8   | 143992078 | 143992244 | GRINA    | 0.0700014      | 0.2009       | 0.00034064 |
| 593 | 8   | 144083500 | 144083713 | GPAA1    | 0.226373       | 0.476135     | 0.0195036  |
| 594 | 8   | 144098788 | 144098865 | SHARPIN  | 0.18429        | 0.0439093    | 0.0171364  |
| 595 | 8   | 144258914 | 144259239 | MROH1    | 0.109218       | 0.279271     | 0.0419167  |
| 596 | 8   | 144262317 | 144262395 | BOP1     | 0.047619       | 0.205429     | 0.0189228  |
| 597 | 8   | 144262503 | 144262587 | BOP1     | 0.1067         | 0.342756     | 0.010004   |
| 598 | 8   | 144263761 | 144263830 | BOP1     | 0.225067       | 0.492754     | 0.0482879  |
| 599 | 8   | 144264616 | 144264713 | BOP1     | 0.216125       | 0.686701     | 0.00988442 |
| 600 | 8   | 144317109 | 144317186 | DGAT1    | 0.176471       | 0.416427     | 0.0314536  |
| 601 | 8   | 144317588 | 144317670 | DGAT1    | 0.173989       | 0.44912      | 0.00572475 |
| 602 | 8   | 144317712 | 144317783 | DGAT1    | 0.175069       | 0.376155     | 0.0478616  |
| 603 | 8   | 144423922 | 144424040 | VPS28    | 0.106546       | 0.200191     | 0.0493686  |
| 604 | 8   | 144510903 | 144510990 | MFSD3    | 0.0587045      | 0.265548     | 0.0219033  |
| 605 | 8   | 18025658  | 18027636  | PCM1     | 0.0231027      | 0.262963     | 0.0181763  |
| 606 | 8   | 22101530  | 22101707  | FAM160B2 | 0.0566544      | 0.308169     | 0.00269837 |
| 607 | 8   | 22154213  | 22154559  | LGI3     | 0.0777171      | 0.251813     | 0.00045757 |
| 608 | 8   | 22614503  | 22614837  | CCAR2    | 0.0466412      | 0.149033     | 0.0304356  |
| 609 | 8   | 22615001  | 22615424  | CCAR2    | 0.13437        | 0.371683     | 0.0384064  |
| 610 | 8   | 66444420  | 66444593  | ADHFE1   | 0.333333       | 0.0151057    | 0.04       |
| 611 | 9   | 113290588 | 113290699 | PRPF4    | 0.05           | 0.485356     | 0.0115623  |
| 612 | 9   | 113390676 | 113390797 | ALAD     | 0.224138       | 0.588832     | 0.00933304 |
| 613 | 9   | 125354841 | 125355643 | GAPVD1   | 0.0350289      | 0.541787     | 0.0204082  |
| 614 | 9   | 127495418 | 127495963 | LRSAM1   | 0.0843271      | 0.374818     | 0.0351563  |
| 615 | 9   | 129005776 | 129006049 | NUP188   | 0.11699        | 0.398635     | 0.0406971  |
| 616 | 9   | 131511467 | 131512040 | POMT1    | 0.103701       | 0.322239     | 0.014138   |
| 617 | 9   | 136375800 | 136376348 | SNAPC4   | 0.0218182      | 0.170458     | 0.0490416  |
| 618 | 9   | 136433279 | 136434036 | INPP5E   | 0.0953906      | 0.576247     | 0.00979386 |
| 619 | 9   | 136463132 | 136463462 | SEC16A   | 0.125          | 1            | 0.00228161 |
| 620 | 9   | 136669721 | 136669913 | EGFL7    | 0.0175439      | 0.173052     | 0.00588262 |
| 621 | 9   | 136979299 | 136979945 | PTGDS    | 0.204421       | 0.446221     | 1.39E-21   |
| 622 | 9   | 137017692 | 137017786 | ABCA2    | 0.0483654      | 0.120419     | 0.00765908 |
| 623 | 9   | 137021610 | 137021890 | ABCA2    | 0.0757528      | 0.244034     | 0.00271777 |
| 624 | 9   | 137040598 | 137040670 | NPDC1    | 0.0401477      | 0.136029     | 0.00014257 |
| 625 | 9   | 137185087 | 137186223 | ANAPC2   | 0.110586       | 0.394823     | 0.0178751  |
| 626 | 9   | 137428141 | 137428881 | NOXA1    | 0.113432       | 0.326538     | 0.0351578  |
| 627 | 9   | 137429016 | 137429275 | NOXA1    | 0.269175       | 0.59761      | 0.0256162  |
| 628 | 9   | 137455634 | 137456410 | NSMF     | 0.0656293      | 0.136022     | 0.0100035  |
| 629 | 9   | 35555701  | 35555951  | RUSC2    | 0.0238095      | 0.185455     | 0.0147037  |
| 630 | 9   | 35740362  | 35740525  | GBA2     | 0.193457       | 0.546763     | 0.00181751 |
| 631 | 9   | 35750989  | 35751265  | RGP1     | 0.0113821      | 0.25         | 0.04       |
| 632 | 9   | 35751412  | 35751626  | RGP1     | 0.10219        | 0.615475     | 0.00828126 |
| 633 | 9   | 35793075  | 35793897  | NPR2     | 1              | 0.0571296    | 0.0196759  |
| 634 | 9   | 83974589  | 83975461  | HNRNPK   | 0.0484699      | 0.144336     | 0.00077647 |
| 635 | 9   | 87639698  | 87639788  | DAPK1    | 0.133333       | 0.549296     | 0.0348361  |
| 636 | 9   | 87697204  | 87698655  | DAPK1    | 0.0243993      | 0.12216      | 0.0447191  |

| S/N | Chr | Start     | End       | Gene    | IR ratio-Young | IR ratio-Old | p-value    |
|-----|-----|-----------|-----------|---------|----------------|--------------|------------|
| 637 | X   | 101254924 | 101255183 | DRP2    | 0.00387926     | 0.123125     | 0.0225713  |
| 638 | X   | 101623893 | 101624157 | ARMCX3  | 0.00325785     | 0.115409     | 0.00841653 |
| 639 | X   | 11120993  | 11121611  | HCCS    | 0.0106827      | 0.2192       | 0.0170045  |
| 640 | X   | 130139871 | 130140532 | AIFM1   | 0.0173014      | 0.235053     | 0.049556   |
| 641 | X   | 153671190 | 153671284 | PNCK    | 0.153377       | 0.246984     | 0.0498538  |
| 642 | X   | 153671672 | 153671879 | PNCK    | 0.157999       | 0.260668     | 0.0336027  |
| 643 | X   | 153688836 | 153690374 | SLC6A8  | 0.0391877      | 0.159051     | 0.00932989 |
| 644 | X   | 153790292 | 153790563 | IDH3G   | 0.010166       | 0.121212     | 0.0127185  |
| 645 | X   | 153798136 | 153798328 | SSR4    | 0.0201581      | 0.116111     | 0.0101307  |
| 646 | X   | 153871179 | 153872151 | L1CAM   | 0.0486063      | 0.161098     | 0.0401197  |
| 647 | X   | 153932115 | 153932315 | NAA10   | 0.221291       | 0.441909     | 0.0018078  |
| 648 | X   | 154380019 | 154380233 | EMD     | 0.196907       | 0.399008     | 0.027291   |
| 649 | X   | 154412214 | 154413206 | TAZ     | 0.12402        | 0.43812      | 0.0347925  |
| 650 | X   | 19354583  | 19355348  | PDHA1   | 0.117999       | 0.315769     | 0.00150976 |
| 651 | X   | 48478168  | 48478448  | FTSJ1   | 0.029525       | 0.272539     | 0.0316764  |
| 652 | X   | 48598037  | 48598716  | WDR13   | 0.131508       | 0.265087     | 0.0321983  |
| 653 | X   | 48923746  | 48923850  | OTUD5   | 0.0219934      | 0.103041     | 0.0391659  |
| 654 | X   | 49033540  | 49033725  | TFE3    | 0.0146396      | 0.146293     | 0.0243741  |
| 655 | X   | 49282063  | 49285833  | PPP1R3F | 0.0385169      | 0.16988      | 0.0330987  |
| 656 | X   | 54922291  | 54922577  | TRO     | 0.410709       | 0.148206     | 0.0154452  |
| 657 | X   | 70500989  | 70502162  | DLG3    | 0.0331263      | 0.166629     | 0.0323792  |
| 658 | X   | 71298816  | 71299941  | NONO    | 0.040637       | 0.121772     | 0.0479643  |
| 659 | X   | 71544635  | 71547906  | OGT     | 0.454747       | 0.756643     | 0.0136301  |

#### **Explanation**

**Start:** The genomic coordinates of the start of the retained intron.

**End:** The genomic coordinates of the end of the retained intron.

**Gene:** The gene that contains the differential retained intron.
