# Supplementary material for: Increased intron retention is a post‐transcriptional signature associated with progressive aging and Alzheimer’s disease
Source: PubMed Central journal article supplement (PMC6516162; doi:10.1111/acel.12928), 2019-03-13
Supplement: ACEL-18-e12928-s008.pdf [file ACEL-18-e12928-s008.pdf]

**Table S7: DAVID functional annotation chart of differential IR genes between Control & AD patients Cerebellum (Mayo Clinic: syn8612213)**

| S/N | GOTERM_BP_DIRECT                                                             | Count | %      | P-value     | Benjamini value |
|-----|------------------------------------------------------------------------------|-------|--------|-------------|-----------------|
| 1   | GO:0000398~mRNA splicing, via spliceosome                                    | 65    | 3.1538 | 1.66096E-13 | 7.39E-10        |
| 2   | GO:0006468~protein phosphorylation                                           | 86    | 4.1727 | 5.99395E-07 | 0.001332467     |
| 3   | GO:0043161~proteasome-mediated ubiquitin-dependent protein catabolic process | 45    | 2.1834 | 6.96139E-06 | 0.010270669     |
| 4   | GO:0031124~mRNA 3'-end processing                                            | 18    | 0.8734 | 1.26778E-05 | 0.014001968     |
| 5   | GO:0006378~mRNA polyadenylation                                              | 13    | 0.6308 | 1.65229E-05 | 0.014594659     |
| 6   | GO:0043547~positive regulation of GTPase activity                            | 95    | 4.6094 | 2.27231E-05 | 0.016708234     |
| 7   | GO:0036498~IRE1-mediated unfolded protein response                           | 19    | 0.9219 | 3.79626E-05 | 0.02383964      |
| 8   | GO:0006418~tRNA aminoacylation for protein translation                       | 15    | 0.7278 | 5.08464E-05 | 0.027881578     |
| 9   | GO:0006406~mRNA export from nucleus                                          | 26    | 1.2615 | 5.80989E-05 | 0.028312513     |
| 10  | GO:0006396~RNA processing                                                    | 25    | 1.2130 | 9.66562E-05 | 0.042092865     |
| 11  | GO:0006369~termination of RNA polymerase II transcription                    | 19    | 0.9219 | 0.000123673 | 0.048792798     |
| 12  | GO:0006281~DNA repair                                                        | 46    | 2.2319 | 0.00013551  | 0.049002296     |

**Table S7: Pathway analysis of differential IR genes between Control & AD patients Cerebellum (Mayo Clinic: syn8612213)**

| S/N | Pathway name                                       | Gene # | ID       | P-value  | FDR      |
|-----|----------------------------------------------------|--------|----------|----------|----------|
| 1   | mRNA surveillance pathway - Homo sapiens (human)   | 27     | hsa03015 | 2.22E-06 | 6.74E-04 |
| 2   | Spliceosome - Homo sapiens (human)                 | 33     | hsa03040 | 1.31E-05 | 1.99E-03 |
| 3   | Aminoacyl-tRNA biosynthesis - Homo sapiens (human) | 14     | hsa00970 | 2.80E-04 | 2.18E-02 |
| 4   | Lysosome - Homo sapiens (human)                    | 28     | hsa04142 | 2.87E-04 | 2.18E-02 |
| 5   | Metabolic pathways - Homo sapiens (human)          | 182    | hsa01100 | 4.26E-04 | 2.58E-02 |
| 6   | Endocytosis - Homo sapiens (human)                 | 48     | hsa04144 | 5.91E-04 | 2.99E-02 |
| 7   | AMPK signaling pathway - Homo sapiens (human)      | 27     | hsa04152 | 7.69E-04 | 2.99E-02 |
| 8   | Lysine degradation - Homo sapiens (human)          | 16     | hsa00310 | 7.90E-04 | 2.99E-02 |
| 9   | RNA degradation - Homo sapiens (human)             | 19     | hsa03018 | 9.48E-04 | 3.19E-02 |
| 10  | Glucagon signaling pathway - Homo sapiens (human)  | 23     | hsa04922 | 1.29E-03 | 3.56E-02 |

| Table S7: Overlap of differential IR genes with curated AD genes (DisGeNET) |          |          |         |           |         |
|-----------------------------------------------------------------------------|----------|----------|---------|-----------|---------|
| DVL1                                                                        | WNK1     | ELAC2    | Sep-02  | FLOT1     | CCDC22  |
| SPEN                                                                        | NCAPD2   | VTN      | PTPRA   | HLA-B     | ZMYM3   |
| CDC42                                                                       | PTMS     | PHF12    | CDC25B  | DDX39B    | TAF1    |
| FABP3                                                                       | P3H3     | RARA     | PYGB    | NELFE     | FLNA    |
| SFPQ                                                                        | ENO2     | COASY    | HM13    | DXO       | MRE11   |
| PABPC4                                                                      | PHB2     | NPEPPS   | TRPC4AP | TNXB      | CD68    |
| AKR1A1                                                                      | RAPGEF3  | COG1     | CD40    | AGER      | CAPN10  |
| FAAH                                                                        | AAAS     | GGA3     | RRP1    | TAP2      | ATAT1   |
| NRDC                                                                        | HNRNPA1  | HGS      | C21orf2 | COL11A2   | WDR45   |
| CLK2                                                                        | LRP1     | FASN     | PCNT    | RXRB      | IL18BP  |
| LMNA                                                                        | CDK4     | CSNK1D   | GGA1    | PHF1      | GAB2    |
| NCSTN                                                                       | ACACB    | MBP      | PLA2G6  | PPARD     | MED17   |
| POU2F1                                                                      | ATXN2    | PTBP1    | SGSM3   | TFEB      | PLD2    |
| COG2                                                                        | MAPKAPK5 | ABCA7    | ACO2    | TTBK1     | DLG4    |
| AGT                                                                         | PSMD9    | SBNO2    | SREBF2  | GSTA4     | ACADVL  |
| BMS1                                                                        | HSPH1    | STK11    | LMF2    | HNRNPA2B1 | BCS1L   |
| UBE2D1                                                                      | LAMP1    | APC2     | NCAPH2  | NT5C3A    | ABCB6   |
| VPS26A                                                                      | NDRG2    | SPPL2B   | CPT1B   | MLXIPL    | GPC1    |
| HPS1                                                                        | TGM1     | APBA3    | ARSA    | ELN       | RANBP9  |
| NDUFB8                                                                      | MTHFD1   | MCOLN1   | SHANK3  | AKAP9     | PGBD1   |
| MGEA5                                                                       | DLST     | DNMT1    | OGG1    | ZCWPW1    | GABBR1  |
| ADD3                                                                        | MOK      | ZGLP1    | RAF1    | FIS1      | ABCA2   |
| MTG1                                                                        | CKB      | TYK2     | CTNNB1  | LRRC4     | EHMT1   |
| IRF7                                                                        | AKT1     | DNM2     | PTH1R   | GSTK1     | HDAC6   |
| BRSK2                                                                       | JAG2     | NFIX     | SCAP    | PAXIP1    | GRK2    |
| APBB1                                                                       | EIF2AK4  | CRTC1    | APEH    | BMP1      | RPS6KB2 |
| ILK                                                                         | RMDN3    | APLP1    | PCBP4   | PTK2B     | CTTN    |
| ABCC8                                                                       | TYRO3    | SIRT2    | CPOX    | FGFR1     | APRT    |
| PAX6                                                                        | CSK      | XRCC1    | CD47    | IKBKB     | SPG7    |
| NR1H3                                                                       | CIB1     | TOMM40   | TF      | POLB      | ARRB2   |
| MADD                                                                        | SYNM     | PPP1R15A | ECE2    | RMDN1     | PRKRA   |
| NXF1                                                                        | TSC2     | BAX      | IDUA    | HSF1      | CLK1    |
| MARK2                                                                       | CREBBP   | RRAS     | CRMP1   | DGAT1     | ALS2    |
| SYVN1                                                                       | NUBP1    | PRPF31   | HADH    | SIGMAR1   | ANXA6   |
| CAPN1                                                                       | EEF2K    | TIA1     | PPID    | FANCG     | SFXN1   |
| RELA                                                                        | TAOK2    | HTRA2    | CCNB1   | SLC2A8    | NQO2    |
| KAT5                                                                        | NAE1     | BIN1     | LMNB1   | CIZ1      | GOLGA2  |
| PC                                                                          | MPHOSPH6 | UBXN4    | APBB3   | DNM1      | PTPA    |
|                                                                             |          |          |         |           | PTGDS   |

**Table S7: Differential IR between Control & AD patients Cerebellum (Mayo Clinic: syn8612213)**

| S/N | Gene    | Ensembl ID      | Position of retained intron | p-value    | AD IR average | Cont IR average |
|-----|---------|-----------------|-----------------------------|------------|---------------|-----------------|
| 1   | NOC2L   | ENSG00000188976 | 1:944800-945056:-           | 2.17E-06   | 0.069969558   | 0.044867947     |
| 2   | NOC2L   | ENSG00000188976 | 1:954082-955922:-           | 0.04010844 | 0.086704762   | 0.111062871     |
| 3   | KLHL17  | ENSG00000187961 | 1:964008-964106:+           | 0.011481   | 0.146047991   | 0.180556084     |
| 4   | SCNN1D  | ENSG00000162572 | 1:1282315-1283977:+         | 0.00149371 | 0.160404239   | 0.103515534     |
| 5   | SCNN1D  | ENSG00000162572 | 1:1287596-1287672:+         | 0.00258349 | 0.246711409   | 0.19542197      |
| 6   | SCNN1D  | ENSG00000162572 | 1:1287836-1287938:+         | 0.00209705 | 0.116815046   | 0.084468727     |
| 7   | ACAP3   | ENSG00000131584 | 1:1294816-1295446:-         | 0.04501617 | 0.105588785   | 0.082954675     |
| 8   | ACAP3   | ENSG00000131584 | 1:1298679-1299344:-         | 0.03690758 | 0.104151913   | 0.122266581     |
| 9   | ACAP3   | ENSG00000131584 | 1:1299356-1299830:-         | 0.03938376 | 0.20988317    | 0.180043603     |
| 10  | ACAP3   | ENSG00000131584 | 1:1299905-1299972:-         | 0.00026566 | 0.15843722    | 0.1044191       |
| 11  | ACAP3   | ENSG00000131584 | 1:1300068-1300157:-         | 0.00176799 | 0.232639284   | 0.178183627     |
| 12  | ACAP3   | ENSG00000131584 | 1:1300202-1300508:-         | 0.00285782 | 0.225713323   | 0.174801492     |
| 13  | ACAP3   | ENSG00000131584 | 1:1300692-1301987:-         | 0.03123215 | 0.153205523   | 0.132263097     |
| 14  | ACAP3   | ENSG00000131584 | 1:1304143-1307768:-         | 0.02702963 | 0.719096951   | 0.738183117     |
| 15  | PUSL1   | ENSG00000169972 | 1:1309603-1309680:+         | 0.03582142 | 0.28975947    | 0.236491645     |
| 16  | PUSL1   | ENSG00000169972 | 1:1309851-1310633:+         | 0.00123268 | 0.250095007   | 0.187164795     |
| 17  | PUSL1   | ENSG00000169972 | 1:1310688-1310908:+         | 0.00868759 | 0.171615662   | 0.128738203     |
| 18  | PUSL1   | ENSG00000169972 | 1:1311071-1311329:+         | 0.00072334 | 0.12360345    | 0.086717193     |
| 19  | CPSF3L  | ENSG00000127054 | 1:1314962-1315403:-         | 0.01780933 | 0.52038828    | 0.468730039     |
| 20  | CPSF3L  | ENSG00000127054 | 1:1315438-1315519:-         | 0.01786511 | 0.49116189    | 0.444574753     |
| 21  | DVL1    | ENSG00000107404 | 1:1341805-1342052:-         | 0.00063431 | 0.134292728   | 0.103785274     |
| 22  | CCNL2   | ENSG00000221978 | 1:1388743-1390229:-         | 2.04E-07   | 0.056647872   | 0.036431844     |
| 23  | ATAD3B  | ENSG00000160072 | 1:1482614-1485015:+         | 0.00885205 | 0.3469245     | 0.300333584     |
| 24  | ATAD3B  | ENSG00000160072 | 1:1489274-1490256:+         | 2.88E-09   | 0.265254517   | 0.364342909     |
| 25  | ATAD3A  | ENSG00000197785 | 1:1522899-1523510:+         | 0.00208806 | 0.099181278   | 0.068697683     |
| 26  | ATAD3A  | ENSG00000197785 | 1:1525291-1526460:+         | 0.01530906 | 0.101964327   | 0.074457598     |
| 27  | ATAD3A  | ENSG00000197785 | 1:1527862-1529222:+         | 0.0054325  | 0.424230317   | 0.372704286     |
| 28  | ATAD3A  | ENSG00000197785 | 1:1529331-1533925:+         | 0.00153584 | 0.157981193   | 0.120432513     |
| 29  | MIB2    | ENSG00000197530 | 1:1616614-1623388:+         | 0.03005089 | 0.196362671   | 0.204107129     |
| 30  | MIB2    | ENSG00000197530 | 1:1625428-1625545:+         | 0.00966094 | 0.100909707   | 0.078467595     |
| 31  | MIB2    | ENSG00000197530 | 1:1627444-1627672:+         | 0.00818602 | 0.353272585   | 0.291603052     |
| 32  | MIB2    | ENSG00000197530 | 1:1628179-1628272:+         | 0.04272041 | 0.297847622   | 0.248002155     |
| 33  | NADK    | ENSG00000008130 | 1:1753060-1753566:-         | 0.00068233 | 0.097680306   | 0.071495842     |
| 34  | NADK    | ENSG00000008130 | 1:1753649-1754050:-         | 0.00284198 | 0.233496666   | 0.207707955     |
| 35  | SKI     | ENSG00000157933 | 1:2229735-2302977:+         | 0.01829734 | 0.071858801   | 0.095672988     |
| 36  | MORN1   | ENSG00000116151 | 1:2324143-2336468:-         | 0.04238599 | 0.213608627   | 0.147236794     |
| 37  | MORN1   | ENSG00000116151 | 1:2358715-2372480:-         | 0.00407114 | 0.147778948   | 0.11801404      |
| 38  | PLCH2   | ENSG00000149527 | 1:2491335-2494855:+         | 0.03674837 | 0.08058638    | 0.099941323     |
| 39  | PLCH2   | ENSG00000149527 | 1:2499720-2502111:+         | 7.87E-05   | 0.06791918    | 0.090332781     |
| 40  | PANK4   | ENSG00000157881 | 1:2521315-2521717:-         | 0.00068428 | 0.068151192   | 0.108366879     |
| 41  | WRAP73  | ENSG00000116213 | 1:3636030-3636994:-         | 0.03000288 | 0.264397001   | 0.314598117     |
| 42  | CEP104  | ENSG00000116198 | 1:3823562-3825757:-         | 0.02874476 | 0.107949974   | 0.090823928     |
| 43  | NPHP4   | ENSG00000131697 | 1:5863405-5863889:-         | 0.02134309 | 0.391936256   | 0.345039026     |
| 44  | PLEKHG5 | ENSG00000171680 | 1:6467572-6467824:-         | 3.80E-08   | 0.322391027   | 0.155017314     |
| 45  | PLEKHG5 | ENSG00000171680 | 1:6468586-6469041:-         | 0.00166145 | 0.208878263   | 0.164146961     |
| 46  | DNAJC11 | ENSG00000007923 | 1:6637340-6637446:-         | 0.01903267 | 0.102867917   | 0.08931041      |
| 47  | VAMP3   | ENSG00000049245 | 1:7771385-7773441:+         | 0.00151749 | 0.348581024   | 0.270559026     |
| 48  | RERE    | ENSG00000142599 | 1:8364838-8365811:-         | 0.03009122 | 0.108948857   | 0.14860736      |
| 49  | UBE4B   | ENSG00000130939 | 1:10161286-10168135:+       | 0.02637975 | 0.13370675    | 0.118127161     |
| 50  | PEX14   | ENSG00000142655 | 1:10623121-10624339:+       | 0.02037952 | 0.11688526    | 0.10169699      |
| 51  | PEX14   | ENSG00000142655 | 1:10624437-10627271:+       | 0.00139447 | 0.105952776   | 0.082281742     |
| 52  | PEX14   | ENSG00000142655 | 1:10627363-10629530:+       | 4.96E-05   | 0.116527306   | 0.087897268     |
| 53  | SRM     | ENSG00000116649 | 1:11055084-11055780:-       | 0.00263127 | 0.112627623   | 0.086128553     |
| 54  | EXOSC10 | ENSG00000171824 | 1:11077443-11077600:-       | 0.00930762 | 0.663224927   | 0.630862519     |
| 55  | FBXO6   | ENSG00000116663 | 1:11668944-11671265:+       | 0.00107784 | 0.355789402   | 0.290669832     |
| 56  | FBXO6   | ENSG00000116663 | 1:11672023-11673276:+       | 0.00311907 | 0.390958207   | 0.328237799     |

| S/N | Gene     | Ensembl ID      | Position of retained intron | p-value    | AD_IR_average | Cont_IR_average |
|-----|----------|-----------------|-----------------------------|------------|---------------|-----------------|
| 57  | MAD2L2   | ENSG00000116670 | 1:11680613-11681038:-       | 4.00E-06   | 0.194162444   | 0.123726573     |
| 58  | KAZN     | ENSG00000189337 | 1:15101774-15103358:+       | 0.01209683 | 0.205621499   | 0.172293018     |
| 59  | KAZN     | ENSG00000189337 | 1:15103460-15104022:+       | 0.0001857  | 0.173661455   | 0.123001209     |
| 60  | PLEKHM2  | ENSG00000116786 | 1:15717992-15718537:+       | 2.69E-06   | 0.103085715   | 0.066722697     |
| 61  | PLEKHM2  | ENSG00000116786 | 1:15728357-15728668:+       | 0.00011291 | 0.142015938   | 0.106132135     |
| 62  | PLEKHM2  | ENSG00000116786 | 1:15728733-15729101:+       | 0.00028672 | 0.119561062   | 0.089323848     |
| 63  | SPEN     | ENSG00000065526 | 1:15938006-15938717:+       | 0.02767209 | 0.150111082   | 0.130739382     |
| 64  | ZBTB17   | ENSG00000116809 | 1:15943895-15944299:-       | 0.03917124 | 0.166590259   | 0.190916214     |
| 65  | NECAP2   | ENSG00000157191 | 1:16455893-16458841:+       | 0.01285782 | 0.326966951   | 0.377973639     |
| 66  | CROCCP3  | ENSG00000080947 | 1:16484464-16485568:-       | 0.00996199 | 0.036428834   | 0.040590994     |
| 67  | CROCCP2  | ENSG00000215908 | 1:16631109-16631529:-       | 0.00014672 | 0.186972898   | 0.134202077     |
| 68  | CROCC    | ENSG00000058453 | 1:16961130-16965722:+       | 0.03629107 | 0.103469255   | 0.119284929     |
| 69  | ATP13A2  | ENSG00000159363 | 1:16986632-16986804:-       | 0.00575673 | 0.225253135   | 0.171424179     |
| 70  | ATP13A2  | ENSG00000159363 | 1:16992581-16993628:-       | 0.00140337 | 0.200908929   | 0.162681609     |
| 71  | ATP13A2  | ENSG00000159363 | 1:16993835-16995975:-       | 0.00088402 | 0.412125695   | 0.356833104     |
| 72  | ATP13A2  | ENSG00000159363 | 1:17002103-17002295:-       | 0.00734954 | 0.13087665    | 0.115528683     |
| 73  | ARHGEF10 | ENSG00000074964 | 1:17638689-17640201:+       | 0.00297857 | 0.118317      | 0.10337893      |
| 74  | ARHGEF10 | ENSG00000074964 | 1:17687747-17695157:+       | 0.01200489 | 0.109735623   | 0.089437831     |
| 75  | ALDH4A1  | ENSG00000159423 | 1:18874581-18875381:-       | 0.0003876  | 0.119691372   | 0.086397103     |
| 76  | ALDH4A1  | ENSG00000159423 | 1:18879373-18881699:-       | 0.00101406 | 0.105085966   | 0.070077994     |
| 77  | ALDH4A1  | ENSG00000159423 | 1:18881887-18883123:-       | 0.00145363 | 0.108093017   | 0.068298863     |
| 78  | MRTO4    | ENSG00000053372 | 1:19257145-19257453:+       | 0.00586063 | 0.131402812   | 0.103063932     |
| 79  | CAPZB    | ENSG00000077549 | 1:19339617-19342751:-       | 3.64E-06   | 0.104909554   | 0.098720839     |
| 80  | CAPZB    | ENSG00000077549 | 1:19342864-19344357:-       | 1.86E-06   | 0.082357502   | 0.073535557     |
| 81  | CDC42    | ENSG00000070831 | 1:22086866-22089942:+       | 0.04358545 | 0.051136663   | 0.042821842     |
| 82  | LYPLA2   | ENSG00000011009 | 1:23793930-23794062:+       | 0.01272738 | 0.19321068    | 0.155785783     |
| 83  | GALE     | ENSG00000117308 | 1:23796265-23796508:-       | 0.01504272 | 0.170193483   | 0.133913412     |
| 84  | SRSF10   | ENSG00000188529 | 1:23971439-23971572:-       | 0.00167681 | 0.067437189   | 0.048290258     |
| 85  | TMEM57   | ENSG00000204178 | 1:25491584-25498263:+       | 1.66E-06   | 0.212486017   | 0.148730973     |
| 86  | LDLRAP1  | ENSG00000157978 | 1:25543786-25553921:+       | 0.00017798 | 0.287626015   | 0.211408477     |
| 87  | LDLRAP1  | ENSG00000157978 | 1:25565207-25566847:+       | 0.02230337 | 0.44270201    | 0.377363909     |
| 88  | MAN1C1   | ENSG00000117643 | 1:25778324-25780939:+       | 1.34E-05   | 0.257042576   | 0.185975987     |
| 89  | SELENON  | ENSG00000162430 | 1:25809820-25811453:+       | 0.01972988 | 0.14157665    | 0.120103797     |
| 90  | SELENON  | ENSG00000162430 | 1:25813993-25814076:+       | 0.00588754 | 0.100016874   | 0.078483968     |
| 91  | SELENON  | ENSG00000162430 | 1:25814178-25815547:+       | 7.93E-06   | 0.15990623    | 0.115733135     |
| 92  | CNKSR1   | ENSG00000142675 | 1:26188503-26188597:+       | 0.01594751 | 0.131497004   | 0.100283958     |
| 93  | UBXN11   | ENSG00000158062 | 1:26284482-26285463:-       | 0.01448225 | 0.357254098   | 0.429556857     |
| 94  | DHDDS    | ENSG00000117682 | 1:26438284-26442730:+       | 0.0165611  | 0.158200002   | 0.20477464      |
| 95  | RPS6KA1  | ENSG00000117676 | 1:26554251-26554595:+       | 0.00050388 | 0.100146017   | 0.076468139     |
| 96  | RPS6KA1  | ENSG00000117676 | 1:26561134-26561504:+       | 0.00350463 | 0.10184327    | 0.083482645     |
| 97  | PIGV     | ENSG00000060642 | 1:26795234-26797562:+       | 0.00712333 | 0.187036929   | 0.225563234     |
| 98  | SLC9A1   | ENSG00000090020 | 1:27102130-27102384:-       | 0.00289418 | 0.103890888   | 0.075502341     |
| 99  | SLC9A1   | ENSG00000090020 | 1:27102558-27102672:-       | 0.03601171 | 0.131260365   | 0.110693349     |
| 100 | SLC9A1   | ENSG00000090020 | 1:27102743-27103222:-       | 0.01447308 | 0.152390861   | 0.125073491     |
| 101 | SLC9A1   | ENSG00000090020 | 1:27103312-27105884:-       | 0.03871468 | 0.175436985   | 0.149211661     |
| 102 | TMEM222  | ENSG00000186501 | 1:27322391-27330719:+       | 0.00012587 | 0.100689276   | 0.072748119     |
| 103 | TRNAU1AF | ENSG00000180098 | 1:28571900-28577499:+       | 1.51E-11   | 0.189546909   | 0.132188104     |
| 104 | PTPRU    | ENSG00000060656 | 1:29317921-29320684:+       | 0.00047166 | 0.235404934   | 0.175487729     |
| 105 | PTPRU    | ENSG00000060656 | 1:29320825-29323370:+       | 6.67E-06   | 0.228657065   | 0.161426596     |
| 106 | SNRNP40  | ENSG00000060688 | 1:31261632-31267870:-       | 0.03032199 | 0.170107433   | 0.140035339     |
| 107 | FABP3    | ENSG00000121769 | 1:31365939-31367392:-       | 1.23E-13   | 0.428318691   | 0.244621488     |
| 108 | FABP3    | ENSG00000121769 | 1:31367494-31369384:-       | 8.22E-11   | 0.41810572    | 0.256843191     |
| 109 | FABP3    | ENSG00000121769 | 1:31369557-31372941:-       | 2.79E-07   | 0.266983239   | 0.183843109     |
| 110 | COL16A1  | ENSG00000084636 | 1:31654043-31654791:-       | 2.44E-06   | 0.106666985   | 0.061990451     |
| 111 | ADGRB2   | ENSG00000121753 | 1:31727605-31728024:-       | 9.15E-06   | 0.183396909   | 0.146679927     |
| 112 | ADGRB2   | ENSG00000121753 | 1:31728081-31728181:-       | 8.74E-07   | 0.060313899   | 0.041467035     |
| 113 | ADGRB2   | ENSG00000121753 | 1:31728277-31728597:-       | 0.01636001 | 0.04151748    | 0.030310965     |

| S/N | Gene    | Ensembl ID      | Position of retained intron | p-value    | AD_IR_average | Cont_IR_average |
|-----|---------|-----------------|-----------------------------|------------|---------------|-----------------|
| 114 | ADGRB2  | ENSG00000121753 | 1:31736390-31736572:-       | 0.00021375 | 0.265373576   | 0.220363203     |
| 115 | ADGRB2  | ENSG00000121753 | 1:31736723-31737428:-       | 0.00106053 | 0.191068306   | 0.157827984     |
| 116 | ADGRB2  | ENSG00000121753 | 1:31740034-31740109:-       | 0.02050504 | 0.104740598   | 0.082544344     |
| 117 | ADGRB2  | ENSG00000121753 | 1:31740541-31741372:-       | 0.00206799 | 0.18097001    | 0.141490394     |
| 118 | TMEM39B | ENSG00000121775 | 1:32094971-32100441:+       | 6.90E-05   | 0.180099544   | 0.1339788       |
| 119 | TXLNA   | ENSG00000084652 | 1:32192430-32192656:+       | 0.00189242 | 0.224070015   | 0.188834257     |
| 120 | CCDC28B | ENSG00000160050 | 1:32204379-32204597:+       | 0.01288251 | 0.150076299   | 0.122055578     |
| 121 | BSDC1   | ENSG00000160058 | 1:32366654-32368446:-       | 4.88E-05   | 0.321840621   | 0.249378319     |
| 122 | ZBTB8OS | ENSG00000176261 | 1:32627544-32631826:-       | 0.00583954 | 0.041302537   | 0.036204355     |
| 123 | SFPQ    | ENSG00000116560 | 1:35176471-35177318:-       | 1.56E-05   | 0.050615071   | 0.035133515     |
| 124 | NCDN    | ENSG00000020129 | 1:35563909-35565226:+       | 0.00375953 | 0.285040191   | 0.239268726     |
| 125 | TRAPPC3 | ENSG00000054116 | 1:36137322-36137795:-       | 5.06E-06   | 0.122278438   | 0.169886203     |
| 126 | MAP7D1  | ENSG00000116871 | 1:36179315-36179511:+       | 0.01954355 | 0.021440798   | 0.019287101     |
| 127 | DNALI1  | ENSG00000163879 | 1:37562245-37565025:+       | 2.46E-07   | 0.172394002   | 0.092209355     |
| 128 | MACF1   | ENSG00000127603 | 1:39284185-39284332:+       | 0.00040939 | 0.077188407   | 0.123687576     |
| 129 | PABPC4  | ENSG00000090621 | 1:39563741-39564422:-       | 0.00346166 | 0.18816325    | 0.182740596     |
| 130 | TRIT1   | ENSG00000043514 | 1:39844640-39847219:-       | 0.00763651 | 0.12701372    | 0.103355852     |
| 131 | TRIT1   | ENSG00000043514 | 1:39847297-39847547:-       | 0.00152653 | 0.140949655   | 0.101016477     |
| 132 | PPIH    | ENSG00000171960 | 1:42667440-42676583:+       | 0.030379   | 0.194646516   | 0.17652519      |
| 133 | P3H1    | ENSG00000117385 | 1:42747412-42747722:-       | 0.02509703 | 0.207923356   | 0.179745245     |
| 134 | P3H1    | ENSG00000117385 | 1:42747798-42748199:-       | 0.00042621 | 0.13638679    | 0.104208887     |
| 135 | P3H1    | ENSG00000117385 | 1:42748317-42750185:-       | 0.00031424 | 0.247314628   | 0.200459574     |
| 136 | SZT2    | ENSG00000198198 | 1:43442368-43442441:+       | 0.0089629  | 0.103359657   | 0.070159669     |
| 137 | HYI     | ENSG00000178922 | 1:43451544-43451647:-       | 1.42E-06   | 0.177740599   | 0.133456979     |
| 138 | HYI     | ENSG00000178922 | 1:43451717-43451797:-       | 2.50E-06   | 0.208794015   | 0.160827683     |
| 139 | HYI     | ENSG00000178922 | 1:43451847-43451934:-       | 2.74E-05   | 0.218993291   | 0.172923313     |
| 140 | HYI     | ENSG00000178922 | 1:43452013-43452204:-       | 0.00639861 | 0.292115305   | 0.253603595     |
| 141 | HYI     | ENSG00000178922 | 1:43453497-43453594:-       | 0.03030705 | 0.28082887    | 0.241627088     |
| 142 | IPO13   | ENSG00000117408 | 1:43958268-43958460:+       | 0.00183826 | 0.142973302   | 0.111698284     |
| 143 | IPO13   | ENSG00000117408 | 1:43958889-43960248:+       | 1.27E-05   | 0.183450518   | 0.127865208     |
| 144 | IPO13   | ENSG00000117408 | 1:43961262-43964268:+       | 0.00035603 | 0.107332402   | 0.081337544     |
| 145 | IPO13   | ENSG00000117408 | 1:43964321-43966574:+       | 0.03082101 | 0.140038206   | 0.122918752     |
| 146 | IPO13   | ENSG00000117408 | 1:43966782-43966929:+       | 0.00029678 | 0.109295639   | 0.083036313     |
| 147 | CCDC24  | ENSG00000159214 | 1:43993964-43995107:+       | 0.01877678 | 0.287123854   | 0.2461815       |
| 148 | SLC6A9  | ENSG00000196517 | 1:43997739-43997854:-       | 0.00036595 | 0.18767901    | 0.128221819     |
| 149 | ERI3    | ENSG00000117419 | 1:44352925-44354891:-       | 0.04080151 | 0.143471743   | 0.167286358     |
| 150 | RNF220  | ENSG00000187147 | 1:44649957-44650703:+       | 2.02E-05   | 0.177476449   | 0.119793813     |
| 151 | HECTD3  | ENSG00000126107 | 1:45003936-45004059:-       | 0.0181334  | 0.100943294   | 0.082392406     |
| 152 | HECTD3  | ENSG00000126107 | 1:45005883-45005996:-       | 0.00516052 | 0.164896098   | 0.214351856     |
| 153 | MUTYH   | ENSG00000132781 | 1:45330557-45331181:-       | 0.00212739 | 0.182940278   | 0.154582883     |
| 154 | MUTYH   | ENSG00000132781 | 1:45331849-45332022:-       | 0.00060597 | 0.504290488   | 0.433016039     |
| 155 | MUTYH   | ENSG00000132781 | 1:45332086-45332165:-       | 0.00193834 | 0.160938426   | 0.127645292     |
| 156 | MUTYH   | ENSG00000132781 | 1:45332310-45332390:-       | 0.00309262 | 0.346231634   | 0.297427597     |
| 157 | MUTYH   | ENSG00000132781 | 1:45332488-45332573:-       | 0.00484248 | 0.384167671   | 0.325434026     |
| 158 | MUTYH   | ENSG00000132781 | 1:45332687-45332762:-       | 0.01077193 | 0.301566073   | 0.25854891      |
| 159 | AKR1A1  | ENSG00000117448 | 1:45569229-45569890:+       | 1.78E-06   | 0.156680228   | 0.10099376      |
| 160 | POMGNT1 | ENSG00000085998 | 1:46196849-46196969:-       | 0.03406445 | 0.121489399   | 0.102558543     |
| 161 | LRRC41  | ENSG00000132128 | 1:46279257-46279491:-       | 0.00030204 | 0.261021178   | 0.21008826      |
| 162 | LRRC41  | ENSG00000132128 | 1:46279614-46280191:-       | 2.62E-06   | 0.15287784    | 0.106563896     |
| 163 | LRRC41  | ENSG00000132128 | 1:46280290-46280395:-       | 3.85E-07   | 0.155732907   | 0.097392524     |
| 164 | LRRC41  | ENSG00000132128 | 1:46280560-46281124:-       | 0.04933094 | 0.198795905   | 0.164889765     |
| 165 | FAAH    | ENSG00000117480 | 1:46409198-46410397:+       | 4.68E-06   | 0.384505634   | 0.312552597     |
| 166 | MKMK1   | ENSG00000079277 | 1:46561642-46562648:-       | 0.00018267 | 0.20602128    | 0.159156525     |
| 167 | NRDC    | ENSG00000078618 | 1:51789657-51790532:-       | 0.00016184 | 0.144806824   | 0.115184443     |
| 168 | NRDC    | ENSG00000078618 | 1:51814813-51816311:-       | 0.03021904 | 0.160461946   | 0.145780129     |
| 169 | ZCCHC11 | ENSG00000134744 | 1:52423913-52425348:-       | 1.09E-05   | 0.048483061   | 0.037045265     |
| 170 | ECHDC2  | ENSG00000121310 | 1:52896597-52897436:-       | 0.0029192  | 0.095015961   | 0.076079718     |



| S/N | Gene     | Ensembl ID      | Position of retained intron | p-value    | AD_IR_average | Cont_IR_average |
|-----|----------|-----------------|-----------------------------|------------|---------------|-----------------|
| 171 | ECHDC2   | ENSG00000121310 | 1:52897484-52899173:-       | 5.55E-14   | 0.301336322   | 0.174944317     |
| 172 | ECHDC2   | ENSG00000121310 | 1:52904833-52905033:-       | 2.82E-05   | 0.576429341   | 0.500839091     |
| 173 | C1orf123 | ENSG00000162384 | 1:53220344-53220569:-       | 1.97E-06   | 0.372796829   | 0.294746468     |
| 174 | MRPL37   | ENSG00000116221 | 1:54216344-54218171:+       | 0.00339632 | 0.207923933   | 0.176668083     |
| 175 | MROH7    | ENSG00000184313 | 1:54706537-54709013:+       | 0.00131742 | 0.140224595   | 0.103219962     |
| 176 | TM2D1    | ENSG00000162604 | 1:61681350-61683416:-       | 1.17E-08   | 0.43428911    | 0.316010688     |
| 177 | TM2D1    | ENSG00000162604 | 1:61683546-61686791:-       | 0.00082716 | 0.031668031   | 0.019111106     |
| 178 | ALG6     | ENSG00000088035 | 1:63419440-63428732:+       | 0.02184927 | 0.139395083   | 0.105507047     |
| 179 | ITGB3BP  | ENSG00000142856 | 1:63441103-63446805:-       | 0.0084221  | 0.158511204   | 0.135659583     |
| 180 | EFCAB7   | ENSG00000203965 | 1:63568519-63571020:+       | 0.0001269  | 0.163052959   | 0.115913475     |
| 181 | EFCAB7   | ENSG00000203965 | 1:63571128-63572441:+       | 1.58E-06   | 0.232109593   | 0.168822992     |
| 182 | SRSF11   | ENSG00000116754 | 1:70221839-70228421:+       | 0.00831464 | 0.067450958   | 0.087647866     |
| 183 | ACADM    | ENSG00000117054 | 1:75761370-75762691:+       | 1.38E-06   | 0.23569723    | 0.14992654      |
| 184 | FUBP1    | ENSG00000162613 | 1:77944269-77945505:-       | 8.41E-05   | 0.853286817   | 0.785527857     |
| 185 | FUBP1    | ENSG00000162613 | 1:77946576-77947452:-       | 0.00014209 | 0.845316488   | 0.746363156     |
| 186 | RNPC3    | ENSG00000185946 | 1:103546342-103546976:+     | 0.00855926 | 0.092549499   | 0.066542374     |
| 187 | CLCC1    | ENSG00000121940 | 1:108934942-108937076:-     | 0.00052949 | 0.215569984   | 0.162496543     |
| 188 | SARS     | ENSG00000031698 | 1:109236548-109237243:+     | 0.01328319 | 0.079211766   | 0.093175726     |
| 189 | PSRC1    | ENSG00000134222 | 1:109281251-109281618:-     | 0.03078009 | 0.21849219    | 0.261372313     |
| 190 | AMPD2    | ENSG00000116337 | 1:109628277-109628363:+     | 0.02644057 | 0.129597568   | 0.112226795     |
| 191 | GSTM4    | ENSG00000168765 | 1:109656787-109657214:+     | 4.04E-07   | 0.139263549   | 0.095436636     |
| 192 | GSTM4    | ENSG00000168765 | 1:109657671-109657771:+     | 8.16E-07   | 0.125500634   | 0.087377683     |
| 193 | GSTM4    | ENSG00000168765 | 1:109659110-109661164:+     | 8.20E-05   | 0.082081978   | 0.068389054     |
| 194 | AHCYL1   | ENSG00000168710 | 1:110019626-110020730:+     | 0.01920178 | 0.100912844   | 0.075858324     |
| 195 | AHCYL1   | ENSG00000168710 | 1:110020851-110021673:+     | 0.04909099 | 0.129228883   | 0.116584575     |
| 196 | STRIP1   | ENSG00000143093 | 1:110045078-110046679:+     | 0.01688396 | 0.102875302   | 0.087344456     |
| 197 | STRIP1   | ENSG00000143093 | 1:110047869-110049111:+     | 0.00963216 | 0.240346434   | 0.213593365     |
| 198 | STRIP1   | ENSG00000143093 | 1:110049238-110049459:+     | 0.00856862 | 0.25748342    | 0.208773613     |
| 199 | STRIP1   | ENSG00000143093 | 1:110049560-110050342:+     | 0.00015838 | 0.169100372   | 0.131556822     |
| 200 | PHTF1    | ENSG00000116793 | 1:113700949-113704080:-     | 2.18E-06   | 0.134580054   | 0.090790696     |
| 201 | AP4B1    | ENSG00000134262 | 1:113896465-113897839:-     | 0.00387266 | 0.087429061   | 0.071160909     |
| 202 | AP4B1    | ENSG00000134262 | 1:113897943-113898717:-     | 0.00851608 | 0.132257922   | 0.104341528     |
| 203 | SIKE1    | ENSG00000052723 | 1:114779284-114780109:-     | 0.00791676 | 0.084253794   | 0.060157543     |
| 204 | POLR3C   | ENSG00000186141 | 1:145839991-145840115:+     | 0.00742892 | 0.100486751   | 0.083970061     |
| 205 | NUDT17   | ENSG00000186364 | 1:145847348-145847582:+     | 0.03236542 | 0.259554715   | 0.214927897     |
| 206 | PEX11B   | ENSG00000131779 | 1:145912566-145916816:-     | 0.00451101 | 0.070105722   | 0.10527107      |
| 207 | POLR3GL  | ENSG00000121851 | 1:145977851-145977982:+     | 0.02371665 | 0.144819663   | 0.171446617     |
| 208 | SF3B4    | ENSG00000143368 | 1:149924014-149925835:-     | 0.00700823 | 0.0954065     | 0.077623473     |
| 209 | VPS45    | ENSG00000136631 | 1:150077231-150077668:+     | 0.01952423 | 0.166305428   | 0.216466288     |
| 210 | CIART    | ENSG00000159208 | 1:150284708-150286429:+     | 0.04187598 | 0.100501207   | 0.080765239     |
| 211 | PRPF3    | ENSG00000117360 | 1:150346136-150346407:+     | 7.34E-05   | 0.380855744   | 0.312717909     |
| 212 | PRPF3    | ENSG00000117360 | 1:150346491-150349156:+     | 8.38E-10   | 0.228386832   | 0.160219036     |
| 213 | TARS2    | ENSG00000143374 | 1:150491511-150491597:+     | 0.00342863 | 0.149539771   | 0.201402613     |
| 214 | TARS2    | ENSG00000143374 | 1:150504733-150504905:+     | 0.00899215 | 0.104358342   | 0.128678781     |
| 215 | SETDB1   | ENSG00000143379 | 1:150963139-150963529:+     | 0.0217818  | 0.342909659   | 0.307981753     |
| 216 | SETDB1   | ENSG00000143379 | 1:150964083-150964246:+     | 0.00297905 | 0.118145524   | 0.093386065     |
| 217 | CERS2    | ENSG00000143418 | 1:150966862-150967073:-     | 0.00192857 | 0.148930133   | 0.123919378     |
| 218 | CERS2    | ENSG00000143418 | 1:150967202-150967391:-     | 0.00340889 | 0.195771171   | 0.164900506     |
| 219 | CERS2    | ENSG00000143418 | 1:150967484-150967663:-     | 0.04422473 | 0.283410239   | 0.26243813      |
| 220 | CERS2    | ENSG00000143418 | 1:150967714-150967819:-     | 0.00049485 | 0.107876194   | 0.082424027     |
| 221 | CERS2    | ENSG00000143418 | 1:150967877-150968082:-     | 0.00222804 | 0.092497172   | 0.07841533      |
| 222 | FAM63A   | ENSG00000143409 | 1:150997367-150997623:-     | 2.35E-05   | 0.459906585   | 0.370824377     |
| 223 | FAM63A   | ENSG00000143409 | 1:150997779-150998081:-     | 0.01025552 | 0.087929038   | 0.110720419     |
| 224 | SEMA6C   | ENSG00000143434 | 1:151138406-151138629:-     | 0.02565867 | 0.165965659   | 0.157312908     |
| 225 | SEMA6C   | ENSG00000143434 | 1:151138731-151139424:-     | 0.00119674 | 0.156235754   | 0.134363245     |
| 226 | PSMB4    | ENSG00000159377 | 1:151400588-151400763:+     | 0.03820446 | 0.19820894    | 0.171159252     |
| 227 | PSMB4    | ENSG00000159377 | 1:151401355-151401541:+     | 4.24E-06   | 0.20687279    | 0.148456299     |

| S/N | Gene     | Ensembl ID      | Position of retained intron | p-value    | AD_IR_average | Cont_IR_average |
|-----|----------|-----------------|-----------------------------|------------|---------------|-----------------|
| 228 | POGZ     | ENSG00000143442 | 1:151424286-151424954:-     | 0.0179528  | 0.198603943   | 0.165466219     |
| 229 | MRPL9    | ENSG00000143436 | 1:151761552-151762104:-     | 0.00618755 | 0.10822347    | 0.133824949     |
| 230 | SNAPIN   | ENSG00000143553 | 1:153658886-153659137:+     | 0.04399106 | 0.218218091   | 0.203664781     |
| 231 | ILF2     | ENSG00000143621 | 1:153662795-153663018:-     | 0.0400226  | 0.116693055   | 0.135077905     |
| 232 | INTS3    | ENSG00000143624 | 1:153760390-153760826:+     | 0.01363584 | 0.178104856   | 0.151536321     |
| 233 | INTS3    | ENSG00000143624 | 1:153772440-153772638:+     | 2.34E-07   | 0.237784011   | 0.168411335     |
| 234 | INTS3    | ENSG00000143624 | 1:153772711-153772924:+     | 3.71E-06   | 0.089459471   | 0.061284771     |
| 235 | AL513523 | ENSG00000279767 | 1:153772711-153772924:-     | 3.71E-06   | 0.089459471   | 0.061284771     |
| 236 | DENND4B  | ENSG00000198837 | 1:153939804-153940155:-     | 0.00210682 | 0.472876463   | 0.407797104     |
| 237 | DENND4B  | ENSG00000198837 | 1:153941048-153941230:-     | 0.00820881 | 0.439771573   | 0.381282104     |
| 238 | CRTC2    | ENSG00000160741 | 1:153949384-153951259:-     | 0.00014545 | 0.135533745   | 0.111714865     |
| 239 | CRTC2    | ENSG00000160741 | 1:153951666-153952017:-     | 0.00031628 | 0.243722823   | 0.206586662     |
| 240 | CRTC2    | ENSG00000160741 | 1:153953369-153953537:-     | 0.03916695 | 0.166630372   | 0.143066468     |
| 241 | CRTC2    | ENSG00000160741 | 1:153953606-153954254:-     | 0.01414095 | 0.134838056   | 0.114149734     |
| 242 | CREB3L4  | ENSG00000143578 | 1:153973716-153973871:+     | 8.77E-06   | 0.141062235   | 0.07231427      |
| 243 | JTB      | ENSG00000143543 | 1:153977013-153977169:-     | 0.03912753 | 0.08741741    | 0.106937222     |
| 244 | TPM3     | ENSG00000143549 | 1:154169383-154170399:-     | 0.00158141 | 0.021781906   | 0.020486224     |
| 245 | C1orf43  | ENSG00000143612 | 1:154212624-154214456:-     | 5.69E-05   | 0.01503615    | 0.01984215      |
| 246 | UBAP2L   | ENSG00000143569 | 1:154260029-154260891:+     | 0.00014125 | 0.159850987   | 0.122504905     |
| 247 | ATP8B2   | ENSG00000143515 | 1:154345545-154345799:+     | 0.02506876 | 0.199560439   | 0.237118286     |
| 248 | SHC1     | ENSG00000160691 | 1:154967797-154967979:-     | 0.00749491 | 0.180970556   | 0.139784671     |
| 249 | FLAD1    | ENSG00000160688 | 1:154988849-154989559:+     | 0.02004197 | 0.113785823   | 0.095773496     |
| 250 | FLAD1    | ENSG00000160688 | 1:154989707-154990158:+     | 0.00233088 | 0.099009715   | 0.075608869     |
| 251 | MTX1     | ENSG00000173171 | 1:155212219-155212384:+     | 0.00397109 | 0.264974694   | 0.216152327     |
| 252 | FAM189B  | ENSG00000160767 | 1:155250821-155251094:-     | 0.00323481 | 0.134398472   | 0.103592008     |
| 253 | FAM189B  | ENSG00000160767 | 1:155251164-155251501:-     | 0.00065565 | 0.279409122   | 0.229655642     |
| 254 | FAM189B  | ENSG00000160767 | 1:155251601-155251732:-     | 0.04178193 | 0.297041963   | 0.272200661     |
| 255 | SCAMP3   | ENSG00000116521 | 1:155256419-155256673:-     | 4.35E-06   | 0.274630939   | 0.201343768     |
| 256 | CLK2     | ENSG00000176444 | 1:155263400-155263949:-     | 0.01121081 | 0.15357344    | 0.138890713     |
| 257 | CLK2     | ENSG00000176444 | 1:155264300-155264467:-     | 0.02722905 | 0.192448745   | 0.166548826     |
| 258 | CLK2     | ENSG00000176444 | 1:155265954-155266728:-     | 0.01196334 | 0.216298909   | 0.184749418     |
| 259 | RUSC1    | ENSG00000160753 | 1:155325178-155325315:+     | 0.01924625 | 0.354277707   | 0.304746539     |
| 260 | YY1AP1   | ENSG00000163374 | 1:155660913-155661306:-     | 4.75E-05   | 0.142107163   | 0.189365004     |
| 261 | DAP3     | ENSG00000132676 | 1:155732033-155736945:+     | 0.00026516 | 0.151834804   | 0.117910464     |
| 262 | GON4L    | ENSG00000116580 | 1:155750733-155751766:-     | 6.28E-06   | 0.454221683   | 0.538331675     |
| 263 | GON4L    | ENSG00000116580 | 1:155752587-155753203:-     | 8.28E-05   | 0.066146152   | 0.104206224     |
| 264 | GON4L    | ENSG00000116580 | 1:155753414-155754374:-     | 0.00011708 | 0.066582528   | 0.108054331     |
| 265 | KIAA0907 | ENSG00000132680 | 1:155914320-155915872:-     | 0.03816359 | 0.286296488   | 0.336582221     |
| 266 | KIAA0907 | ENSG00000132680 | 1:155916737-155917498:-     | 8.20E-05   | 0.154516378   | 0.188542925     |
| 267 | ARHGEF2  | ENSG00000116584 | 1:155952235-155952627:-     | 0.00137854 | 0.099179667   | 0.082084865     |
| 268 | LMNA     | ENSG00000160789 | 1:156138757-156139079:+     | 0.04671165 | 0.230782051   | 0.205051371     |
| 269 | PMF1     | ENSG00000160783 | 1:156236483-156239547:+     | 0.0425026  | 0.053731485   | 0.052183561     |
| 270 | PAQR6    | ENSG00000160781 | 1:156244403-156244689:-     | 0.03872218 | 0.019164617   | 0.012628374     |
| 271 | SMG5     | ENSG00000198952 | 1:156250996-156251402:-     | 1.53E-10   | 0.388211988   | 0.285965338     |
| 272 | C1orf61  | ENSG00000125462 | 1:156407197-156407841:-     | 0.02772105 | 0.327715244   | 0.275451104     |
| 273 | C1orf61  | ENSG00000125462 | 1:156414753-156421554:-     | 0.01393783 | 0.047610156   | 0.03932137      |
| 274 | HAPLN2   | ENSG00000132702 | 1:156624467-156624600:+     | 0.00099998 | 0.231417907   | 0.174570523     |
| 275 | HAPLN2   | ENSG00000132702 | 1:156624783-156625100:+     | 0.00651344 | 0.295911056   | 0.229435384     |
| 276 | ARHGEF11 | ENSG00000132694 | 1:156946162-156946661:-     | 0.0001853  | 0.09403386    | 0.064448058     |
| 277 | IGSF8    | ENSG00000162729 | 1:160091608-160091807:-     | 1.47E-09   | 0.456467561   | 0.362573335     |
| 278 | IGSF8    | ENSG00000162729 | 1:160091938-160092281:-     | 8.54E-08   | 0.430076073   | 0.345161768     |
| 279 | IGSF8    | ENSG00000162729 | 1:160094171-160094868:-     | 0.04267364 | 0.301931902   | 0.330315468     |
| 280 | IGSF8    | ENSG00000162729 | 1:160095246-160098408:-     | 0.0110518  | 0.119151602   | 0.139752262     |
| 281 | NCSTN    | ENSG00000162736 | 1:160355757-160355862:+     | 0.00047912 | 0.131790938   | 0.100401292     |
| 282 | NIT1     | ENSG00000158793 | 1:161119612-161119818:+     | 0.03386272 | 0.127215577   | 0.101410996     |
| 283 | USP21    | ENSG00000143258 | 1:161162726-161162918:+     | 0.01199466 | 0.381074659   | 0.341163078     |
| 284 | USP21    | ENSG00000143258 | 1:161163074-161163554:+     | 2.01E-05   | 0.202232462   | 0.137396343     |

| S/N | Gene     | Ensembl ID      | Position of retained intron | p-value    | AD_IR_average | Cont_IR_average |
|-----|----------|-----------------|-----------------------------|------------|---------------|-----------------|
| 285 | USP21    | ENSG00000143258 | 1:161163619-161163877:+     | 9.27E-05   | 0.346139573   | 0.266596423     |
| 286 | USP21    | ENSG00000143258 | 1:161164612-161164834:+     | 0.00090007 | 0.46744378    | 0.397422792     |
| 287 | PPOX     | ENSG00000143224 | 1:161170769-161170906:+     | 0.01564131 | 0.241437098   | 0.208024571     |
| 288 | PPOX     | ENSG00000143224 | 1:161170949-161171033:+     | 0.00184591 | 0.403888488   | 0.327216117     |
| 289 | B4GALT3  | ENSG00000158850 | 1:161172331-161173604:-     | 0.03727074 | 0.263466988   | 0.237625818     |
| 290 | NDUFS2   | ENSG00000158864 | 1:161213921-161214155:+     | 0.00094558 | 0.485455537   | 0.409476403     |
| 291 | UCK2     | ENSG00000143179 | 1:165896332-165903181:+     | 0.00326985 | 0.181712938   | 0.14002144      |
| 292 | POU2F1   | ENSG00000143190 | 1:167412304-167413025:+     | 0.01401267 | 0.101526037   | 0.082571381     |
| 293 | C1orf112 | ENSG00000000460 | 1:169851936-169852789:+     | 0.00141735 | 0.174778534   | 0.207773399     |
| 294 | PRRC2C   | ENSG00000117523 | 1:171587221-171587647:+     | 0.00849635 | 0.092772195   | 0.074473847     |
| 295 | MRPS14   | ENSG00000120333 | 1:175014851-175018417:-     | 2.52E-05   | 0.108709037   | 0.062435378     |
| 296 | MRPS14   | ENSG00000120333 | 1:175018576-175023363:-     | 0.00228404 | 0.139593388   | 0.08947883      |
| 297 | TOR3A    | ENSG00000186283 | 1:179094217-179094967:+     | 5.48E-07   | 0.103937741   | 0.061998866     |
| 298 | IPO9     | ENSG00000198700 | 1:201870858-201871160:+     | 0.00070876 | 0.061160319   | 0.096899777     |
| 299 | IPO9     | ENSG00000198700 | 1:201874372-201874831:+     | 2.79E-06   | 0.311343927   | 0.221568356     |
| 300 | IPO9     | ENSG00000198700 | 1:201874936-201875151:+     | 4.53E-06   | 0.19751435    | 0.137231949     |
| 301 | IPO9     | ENSG00000198700 | 1:201875228-201875943:+     | 3.95E-05   | 0.096738563   | 0.068548784     |
| 302 | KDM5B    | ENSG00000117139 | 1:202729173-202729706:-     | 0.00072057 | 0.148668491   | 0.182176469     |
| 303 | CYB5R1   | ENSG00000159348 | 1:202963727-202964611:-     | 0.00340574 | 0.125680729   | 0.093921551     |
| 304 | CYB5R1   | ENSG00000159348 | 1:202964695-202965370:-     | 0.02800146 | 0.12038749    | 0.093897062     |
| 305 | PPFIA4   | ENSG00000143847 | 1:203045987-203046247:+     | 2.84E-05   | 0.220473031   | 0.167091534     |
| 306 | SOX13    | ENSG00000143842 | 1:204123804-204124640:+     | 0.02016732 | 0.202900222   | 0.159171806     |
| 307 | PLEKHA6  | ENSG00000143850 | 1:204222779-204223461:-     | 5.18E-05   | 0.343897463   | 0.267853765     |
| 308 | PLEKHA6  | ENSG00000143850 | 1:204223585-204228082:-     | 9.20E-07   | 0.425285256   | 0.307350536     |
| 309 | PLEKHA6  | ENSG00000143850 | 1:204228228-204228727:-     | 3.99E-05   | 0.200835365   | 0.137289679     |
| 310 | CNTN2    | ENSG00000184144 | 1:205073236-205073655:+     | 0.01238112 | 0.157992556   | 0.130887018     |
| 311 | EIF2D    | ENSG00000143486 | 1:206591845-206593618:-     | 0.00015244 | 0.156834701   | 0.121890227     |
| 312 | EIF2D    | ENSG00000143486 | 1:206593793-206595717:-     | 0.00028054 | 0.266109671   | 0.221711661     |
| 313 | EIF2D    | ENSG00000143486 | 1:206602453-206602950:-     | 0.0017564  | 0.235469432   | 0.173327039     |
| 314 | PLXNA2   | ENSG00000076356 | 1:208038474-208038824:-     | 0.02294994 | 0.205900717   | 0.15493629      |
| 315 | SMYD2    | ENSG00000143499 | 1:214331070-214332017:+     | 0.00611365 | 0.214440141   | 0.163068717     |
| 316 | SMYD2    | ENSG00000143499 | 1:214332192-214334199:+     | 0.00435619 | 0.248258907   | 0.196662725     |
| 317 | SMYD2    | ENSG00000143499 | 1:214334308-214336703:+     | 2.03E-05   | 0.101250346   | 0.066612426     |
| 318 | KCTD3    | ENSG00000136636 | 1:215611921-215618885:+     | 0.01392113 | 0.073937343   | 0.086625652     |
| 319 | EPRS     | ENSG00000136628 | 1:219969122-219972068:-     | 0.02473918 | 0.09755036    | 0.073863143     |
| 320 | TMEM63A  | ENSG00000196187 | 1:225852769-225853628:-     | 4.15E-06   | 0.107096138   | 0.059272113     |
| 321 | TMEM63A  | ENSG00000196187 | 1:225853791-225855877:-     | 1.78E-06   | 0.138392552   | 0.069983071     |
| 322 | PYCR2    | ENSG00000143811 | 1:225921371-225921551:-     | 1.16E-05   | 0.106392327   | 0.072015092     |
| 323 | PYCR2    | ENSG00000143811 | 1:225921644-225921857:-     | 1.13E-05   | 0.129257332   | 0.086634921     |
| 324 | PYCR2    | ENSG00000143811 | 1:225922383-225923700:-     | 1.94E-05   | 0.296741159   | 0.226339364     |
| 325 | COQ8A    | ENSG00000163050 | 1:226982149-226982677:+     | 0.00083634 | 0.08839551    | 0.128389892     |
| 326 | COQ8A    | ENSG00000163050 | 1:226982763-226982893:+     | 0.03584356 | 0.126159512   | 0.113145057     |
| 327 | COQ8A    | ENSG00000163050 | 1:226983633-226983760:+     | 0.00052536 | 0.327074195   | 0.252802161     |
| 328 | COQ8A    | ENSG00000163050 | 1:226983854-226984093:+     | 0.00328634 | 0.29182104    | 0.232449242     |
| 329 | COQ8A    | ENSG00000163050 | 1:226984235-226984547:+     | 0.00201613 | 0.11581059    | 0.081199239     |
| 330 | COG2     | ENSG00000135775 | 1:230691564-230693291:+     | 0.00191763 | 0.139730751   | 0.11386963      |
| 331 | AGT      | ENSG00000135744 | 1:230704337-230705932:-     | 1.37E-05   | 0.135726102   | 0.09196057      |
| 332 | TTC13    | ENSG00000143643 | 1:230907019-230908711:-     | 0.00014245 | 0.106028594   | 0.077838116     |
| 333 | C1orf131 | ENSG00000143633 | 1:231224414-231225470:-     | 0.00658593 | 0.32676007    | 0.265930981     |
| 334 | GNPAT    | ENSG00000116906 | 1:231274062-231275220:+     | 0.00680841 | 0.140851248   | 0.116238705     |
| 335 | TARBP1   | ENSG00000059588 | 1:234398553-234401180:-     | 0.00627393 | 0.087401776   | 0.084543458     |
| 336 | SDCCAG8  | ENSG00000054282 | 1:243489140-243499755:+     | 2.43E-07   | 0.191726768   | 0.129427369     |
| 337 | EFCAB2   | ENSG00000203666 | 1:245083688-245087244:+     | 0.0007042  | 0.138183844   | 0.111234771     |
| 338 | ZNF692   | ENSG00000171163 | 1:248854051-248855379:-     | 0.00595236 | 0.089946866   | 0.077791203     |
| 339 | PFKP     | ENSG00000067057 | 10:3120044-3129818:+        | 2.50E-06   | 0.32346181    | 0.228182061     |
| 340 | RBM17    | ENSG00000134453 | 10:6113581-6114048:+        | 0.02975952 | 0.120250478   | 0.101436938     |
| 341 | KIN      | ENSG00000151657 | 10:7756142-7759889:-        | 2.93E-05   | 0.106765289   | 0.070717564     |



| S/N | Gene     | Ensembl ID      | Position of retained intron | p-value    | AD_IR_average | Cont_IR_average |
|-----|----------|-----------------|-----------------------------|------------|---------------|-----------------|
| 342 | SEC61A2  | ENSG00000065665 | 10:12158105-12160929:+      | 0.04687754 | 0.127793945   | 0.103432706     |
| 343 | NUDT5    | ENSG00000165609 | 10:12170770-12170899:-      | 0.00019124 | 0.29123098    | 0.356467581     |
| 344 | NUDT5    | ENSG00000165609 | 10:12170908-12172764:-      | 0.00109507 | 0.101874884   | 0.122576605     |
| 345 | CDC123   | ENSG00000151465 | 10:12249718-12250310:+      | 2.14E-05   | 0.128483345   | 0.085881132     |
| 346 | NMT2     | ENSG00000152465 | 10:15109215-15109701:-      | 0.00301839 | 0.177534868   | 0.180192909     |
| 347 | NMT2     | ENSG00000152465 | 10:15132933-15133052:-      | 5.11E-07   | 0.088162757   | 0.174554186     |
| 348 | FAM188A  | ENSG00000148481 | 10:15782226-15786560:-      | 0.00492667 | 0.143511656   | 0.115071592     |
| 349 | NEBL     | ENSG00000078114 | 10:20814043-20815624:-      | 0.00353628 | 0.232438654   | 0.183362113     |
| 350 | COMMD3   | ENSG00000269897 | 10:22317995-22318104:+      | 0.00095679 | 0.106680012   | 0.068970446     |
| 351 | COMMD3   | ENSG00000269897 | 10:22318168-22318271:+      | 0.01317248 | 0.148669098   | 0.111780656     |
| 352 | COMMD3   | ENSG00000269897 | 10:22318862-22318958:+      | 0.00851901 | 0.312909524   | 0.295830714     |
| 353 | RAB18    | ENSG00000099246 | 10:27533853-27533927:+      | 0.00053482 | 0.136487055   | 0.099716175     |
| 354 | BMS1     | ENSG00000165733 | 10:42816672-42817317:+      | 0.00069332 | 0.129136823   | 0.190786513     |
| 355 | BMS1     | ENSG00000165733 | 10:42820992-42822061:+      | 0.00851351 | 0.109038951   | 0.084820799     |
| 356 | OGDHL    | ENSG00000197444 | 10:49739839-49740709:-      | 0.0001852  | 0.201188345   | 0.144968091     |
| 357 | OGDHL    | ENSG00000197444 | 10:49740837-49742827:-      | 0.01390822 | 0.126421115   | 0.123509594     |
| 358 | UBE2D1   | ENSG00000072401 | 10:58364876-58367922:+      | 1.30E-07   | 0.12446652    | 0.061831603     |
| 359 | UBE2D1   | ENSG00000072401 | 10:58368016-58368719:+      | 6.69E-06   | 0.15744782    | 0.091677452     |
| 360 | HNRNP3   | ENSG00000096746 | 10:68341309-68341584:+      | 0.01786367 | 0.083078924   | 0.099092609     |
| 361 | RUFY2    | ENSG00000204130 | 10:68355401-68363589:-      | 0.00147512 | 0.099066344   | 0.068494573     |
| 362 | CCAR1    | ENSG00000060339 | 10:68754827-68755369:+      | 0.04597967 | 0.079545135   | 0.0931193       |
| 363 | CCAR1    | ENSG00000060339 | 10:68757377-68761006:+      | 0.00843751 | 0.089801218   | 0.109695629     |
| 364 | VPS26A   | ENSG00000122958 | 10:69168631-69171155:+      | 0.01592595 | 0.154930517   | 0.197631523     |
| 365 | TSPAN15  | ENSG00000099282 | 10:69498396-69504437:+      | 0.0003454  | 0.252270173   | 0.206809519     |
| 366 | TSPAN15  | ENSG00000099282 | 10:69504485-69506123:+      | 3.91E-09   | 0.320025401   | 0.218189408     |
| 367 | TSPAN15  | ENSG00000099282 | 10:69506240-69506828:+      | 2.81E-08   | 0.303021926   | 0.200128309     |
| 368 | H2AFY2   | ENSG00000099284 | 10:70100297-70109032:+      | 0.00366526 | 0.137469426   | 0.105329394     |
| 369 | ANAPC16  | ENSG00000166295 | 10:72216138-72220053:+      | 0.02686247 | 0.09879957    | 0.094192231     |
| 370 | DNAJB12  | ENSG00000148719 | 10:72336696-72338201:-      | 1.89E-06   | 0.35863231    | 0.273625552     |
| 371 | FAM149B1 | ENSG00000138286 | 10:73234940-73235192:+      | 0.00500484 | 0.286865756   | 0.274704964     |
| 372 | FAM149B1 | ENSG00000138286 | 10:73239384-73240945:+      | 0.00236631 | 0.186497741   | 0.148595316     |
| 373 | DNAJC9   | ENSG00000213551 | 10:73246828-73247009:-      | 0.01663267 | 0.191634846   | 0.23938086      |
| 374 | MRPS16   | ENSG00000182180 | 10:73250991-73251762:-      | 9.44E-05   | 0.133390917   | 0.092351508     |
| 375 | ZSWIM8   | ENSG00000214655 | 10:73789824-73789955:+      | 0.00098613 | 0.133103373   | 0.183799094     |
| 376 | ZSWIM8   | ENSG00000214655 | 10:73794330-73794540:+      | 5.01E-06   | 0.040486332   | 0.062728451     |
| 377 | ZSWIM8   | ENSG00000214655 | 10:73797014-73797112:+      | 0.01269378 | 0.420887207   | 0.46755839      |
| 378 | ZSWIM8   | ENSG00000214655 | 10:73800170-73800295:+      | 7.65E-08   | 0.284049024   | 0.229288623     |
| 379 | ZSWIM8   | ENSG00000214655 | 10:73801195-73801315:+      | 3.81E-05   | 0.17919582    | 0.138216834     |
| 380 | NDST2    | ENSG00000166507 | 10:73802776-73802971:-      | 0.0306747  | 0.309667902   | 0.265858068     |
| 381 | COMTD1   | ENSG00000165644 | 10:75234743-75234937:-      | 0.01365304 | 0.294110744   | 0.248892225     |
| 382 | ANXA11   | ENSG00000122359 | 10:80155912-80157640:-      | 2.33E-06   | 0.103947768   | 0.072779723     |
| 383 | RPP30    | ENSG00000148688 | 10:90894891-90895453:+      | 0.03937296 | 0.230453694   | 0.188760522     |
| 384 | EXOSC1   | ENSG00000171311 | 10:97436551-97437190:-      | 4.27E-05   | 0.129850315   | 0.095550847     |
| 385 | EXOSC1   | ENSG00000171311 | 10:97437275-97437699:-      | 5.20E-06   | 0.132011701   | 0.092056501     |
| 386 | EXOSC1   | ENSG00000171311 | 10:97438703-97441170:-      | 0.00174761 | 0.126641473   | 0.102141825     |
| 387 | ZDHC16   | ENSG00000171307 | 10:97451918-97452089:+      | 0.02150509 | 0.09344446    | 0.080032773     |
| 388 | ZDHC16   | ENSG00000171307 | 10:97452284-97452414:+      | 0.00017115 | 0.114518111   | 0.082427236     |
| 389 | ZDHC16   | ENSG00000171307 | 10:97453663-97453798:+      | 5.97E-07   | 0.181405582   | 0.127390065     |
| 390 | ZDHC16   | ENSG00000171307 | 10:97453846-97454713:+      | 2.85E-07   | 0.213036037   | 0.155560569     |
| 391 | ZDHC16   | ENSG00000171307 | 10:97455783-97455973:+      | 4.62E-07   | 0.225754817   | 0.16960121      |
| 392 | MMS19    | ENSG00000155229 | 10:97458719-97458799:-      | 7.30E-05   | 0.251710761   | 0.186629356     |
| 393 | MMS19    | ENSG00000155229 | 10:97459282-97459361:-      | 6.40E-05   | 0.161267268   | 0.129066917     |
| 394 | MMS19    | ENSG00000155229 | 10:97459741-97460045:-      | 0.01589619 | 0.139425763   | 0.12004007      |
| 395 | MMS19    | ENSG00000155229 | 10:97460232-97460694:-      | 0.04149278 | 0.14320585    | 0.127137773     |
| 396 | MMS19    | ENSG00000155229 | 10:97460751-97460906:-      | 0.00013739 | 0.115191317   | 0.086397292     |
| 397 | MMS19    | ENSG00000155229 | 10:97461007-97461495:-      | 0.02351975 | 0.201235506   | 0.170797838     |
| 398 | MMS19    | ENSG00000155229 | 10:97461896-97462016:-      | 0.00021198 | 0.095997117   | 0.068535284     |

| S/N | Gene     | Ensembl ID      | Position of retained intron | p-value    | AD_IR_average | Cont_IR_average |
|-----|----------|-----------------|-----------------------------|------------|---------------|-----------------|
| 399 | MMS19    | ENSG00000155229 | 10:97465954-97466058:-      | 0.00352631 | 0.124267361   | 0.100263603     |
| 400 | MMS19    | ENSG00000155229 | 10:97466159-97466503:-      | 0.01046461 | 0.306899463   | 0.26153313      |
| 401 | MMS19    | ENSG00000155229 | 10:97466585-97466775:-      | 0.01747961 | 0.189243633   | 0.163791117     |
| 402 | ZFYVE27  | ENSG00000155256 | 10:97753182-97757264:+      | 0.00027207 | 0.219501879   | 0.167555761     |
| 403 | ZFYVE27  | ENSG00000155256 | 10:97757311-97757641:+      | 0.00072368 | 0.125653443   | 0.088760742     |
| 404 | HPS1     | ENSG00000107521 | 10:98425985-98427214:-      | 0.01415139 | 0.213814889   | 0.174600453     |
| 405 | HPS1     | ENSG00000107521 | 10:98434091-98435634:-      | 0.00452438 | 0.063549869   | 0.049986213     |
| 406 | SLC25A28 | ENSG00000155287 | 10:99613924-99620044:-      | 2.94E-05   | 0.217159156   | 0.153440852     |
| 407 | CWF19L1  | ENSG00000095485 | 10:100235764-100236849:-    | 0.0008483  | 0.071621345   | 0.053944817     |
| 408 | SEC31B   | ENSG00000075826 | 10:100489398-100489702:-    | 0.00011543 | 0.476408049   | 0.390099623     |
| 409 | SEC31B   | ENSG00000075826 | 10:100490883-100495384:-    | 0.01462765 | 0.094545556   | 0.106077687     |
| 410 | NDUFB8   | ENSG00000166136 | 10:100523929-100526398:-    | 7.48E-05   | 0.088072259   | 0.069141174     |
| 411 | LZTS2    | ENSG00000107816 | 10:101002946-101003506:+    | 0.0090947  | 0.08841805    | 0.071105083     |
| 412 | PDZD7    | ENSG00000186862 | 10:101019217-101020617:-    | 0.0495867  | 0.135532523   | 0.107204496     |
| 413 | PDZD7    | ENSG00000186862 | 10:101020678-101021797:-    | 0.00529897 | 0.171049652   | 0.121794904     |
| 414 | POLL     | ENSG00000166169 | 10:101583681-101584601:-    | 0.02246564 | 0.176667178   | 0.190895577     |
| 415 | MGEA5    | ENSG00000198408 | 10:101813606-101817823:-    | 0.01749394 | 0.100078915   | 0.080063094     |
| 416 | KCNIP2   | ENSG00000120049 | 10:101827993-101828150:-    | 0.00899285 | 0.217131378   | 0.191560055     |
| 417 | PPRC1    | ENSG00000148840 | 10:102148694-102148816:+    | 0.0373747  | 0.176748934   | 0.148632082     |
| 418 | PPRC1    | ENSG00000148840 | 10:102149329-102149925:+    | 0.00072742 | 0.096991328   | 0.071455793     |
| 419 | GBF1     | ENSG00000107862 | 10:102377140-102379283:+    | 0.00331428 | 0.086519488   | 0.07140856      |
| 420 | GBF1     | ENSG00000107862 | 10:102379651-102379852:+    | 0.01784536 | 0.140683293   | 0.123651829     |
| 421 | FBXL15   | ENSG00000107872 | 10:102421507-102421786:+    | 0.03822348 | 0.464419024   | 0.421445416     |
| 422 | MFSD13A  | ENSG00000138111 | 10:102470075-102470664:+    | 3.33E-06   | 0.377935171   | 0.296197075     |
| 423 | MFSD13A  | ENSG00000138111 | 10:102472950-102473569:+    | 0.0142706  | 0.175695449   | 0.143528555     |
| 424 | MFSD13A  | ENSG00000138111 | 10:102474012-102475721:+    | 0.02564477 | 0.226674549   | 0.202266956     |
| 425 | BORCS7   | ENSG00000166275 | 10:102862180-102862872:+    | 0.04357374 | 0.124144493   | 0.10673588      |
| 426 | PDCD11   | ENSG00000148843 | 10:103444068-103444516:+    | 0.01215215 | 0.129952551   | 0.100952339     |
| 427 | ADD3     | ENSG00000148700 | 10:110130486-110133325:+    | 0.03596179 | 0.088942837   | 0.070588411     |
| 428 | BBIP1    | ENSG00000214413 | 10:110918213-110919120:-    | 0.00992911 | 0.072100162   | 0.054487819     |
| 429 | ZDHHC6   | ENSG00000023041 | 10:112430907-112432239:-    | 0.00021419 | 0.097646001   | 0.072872867     |
| 430 | ZDHHC6   | ENSG00000023041 | 10:112433281-112434296:-    | 0.00203679 | 0.113667421   | 0.139389466     |
| 431 | SFXN4    | ENSG00000183605 | 10:119141319-119146235:-    | 0.00082831 | 0.100233211   | 0.073581606     |
| 432 | WDR11    | ENSG00000120008 | 10:120906021-120906775:+    | 0.04339755 | 0.479653927   | 0.431179532     |
| 433 | NSMCE4A  | ENSG00000107672 | 10:121957259-121959323:-    | 0.00181354 | 0.120661774   | 0.095981755     |
| 434 | NSMCE4A  | ENSG00000107672 | 10:121959595-121960357:-    | 0.01064195 | 0.257727268   | 0.214444943     |
| 435 | EDRF1    | ENSG00000107938 | 10:125752914-125753693:+    | 0.03336148 | 0.103480665   | 0.118182139     |
| 436 | UROS     | ENSG00000188690 | 10:125796188-125798064:-    | 0.01613659 | 0.104260474   | 0.083970726     |
| 437 | DHX32    | ENSG00000089876 | 10:125836855-125838205:-    | 0.00127962 | 0.109067921   | 0.083677934     |
| 438 | DHX32    | ENSG00000089876 | 10:125838387-125839000:-    | 0.03157549 | 0.111602462   | 0.090147508     |
| 439 | DHX32    | ENSG00000089876 | 10:125841934-125852292:-    | 0.01736751 | 0.148638446   | 0.11541501      |
| 440 | DPYSL4   | ENSG00000151640 | 10:132198971-132200355:+    | 0.01400222 | 0.085717916   | 0.11448256      |
| 441 | DPYSL4   | ENSG00000151640 | 10:132202825-132203761:+    | 0.00240388 | 0.282428915   | 0.22980997      |
| 442 | KNDC1    | ENSG00000171798 | 10:133160569-133167380:+    | 0.04057769 | 0.237369623   | 0.192514335     |
| 443 | TUBGCP2  | ENSG00000130640 | 10:133293769-133297951:-    | 0.02207446 | 0.141586273   | 0.192385026     |
| 444 | ECHS1    | ENSG00000127884 | 10:133366095-133366888:-    | 7.04E-10   | 0.119502511   | 0.074395772     |
| 445 | ECHS1    | ENSG00000127884 | 10:133366993-133368922:-    | 0.0063463  | 0.11087485    | 0.091284109     |
| 446 | MTG1     | ENSG00000148824 | 10:133399619-133401528:+    | 0.04254246 | 0.484755354   | 0.454529299     |
| 447 | MTG1     | ENSG00000148824 | 10:133401590-133402148:+    | 8.83E-05   | 0.493384585   | 0.430794091     |
| 448 | SYCE1    | ENSG00000171772 | 10:133555903-133555980:-    | 0.04111819 | 0.131298861   | 0.096539921     |
| 449 | RIC8A    | ENSG00000177963 | 11:212759-212836:+          | 0.02963792 | 0.115554673   | 0.136024743     |
| 450 | PSMD13   | ENSG00000185627 | 11:247448-248775:+          | 0.02873558 | 0.136814805   | 0.116819368     |
| 451 | PSMD13   | ENSG00000185627 | 11:248855-248931:+          | 0.00585909 | 0.14568699    | 0.174807066     |
| 452 | B4GALNT4 | ENSG00000182272 | 11:375773-375846:+          | 0.04058789 | 0.29435028    | 0.243565727     |
| 453 | SIGIRR   | ENSG00000185187 | 11:406993-407061:-          | 0.04990693 | 0.08905731    | 0.109104306     |
| 454 | PTDSS2   | ENSG00000174915 | 11:487073-487419:+          | 0.03874197 | 0.139846376   | 0.116050012     |
| 455 | RNH1     | ENSG00000023191 | 11:495053-497970:-          | 0.00030205 | 0.098659341   | 0.071575909     |

| S/N | Gene    | Ensembl ID      | Position of retained intron | p-value    | AD_IR_average | Cont_IR_average |
|-----|---------|-----------------|-----------------------------|------------|---------------|-----------------|
| 456 | HRAS    | ENSG00000174775 | 11:532522-532630:-          | 0.04666357 | 0.194013473   | 0.164754418     |
| 457 | PHRF1   | ENSG00000070047 | 11:610347-610500:+          | 0.00523954 | 0.070210384   | 0.084402361     |
| 458 | IRF7    | ENSG00000185507 | 11:612800-612998:-          | 0.00699829 | 0.233195516   | 0.276026671     |
| 459 | PDDC1   | ENSG00000177225 | 11:772521-773521:-          | 0.00011371 | 0.112559757   | 0.093331249     |
| 460 | PDDC1   | ENSG00000177225 | 11:772521-774007:-          | 0.03222237 | 0.079014598   | 0.066209031     |
| 461 | PIDD1   | ENSG00000177595 | 11:802090-802194:-          | 0.00039355 | 0.180183889   | 0.129897579     |
| 462 | PNPLA2  | ENSG00000177666 | 11:821860-821957:+          | 0.01330416 | 0.104063457   | 0.061221758     |
| 463 | PNPLA2  | ENSG00000177666 | 11:822023-822396:+          | 0.00336589 | 0.120142179   | 0.079237029     |
| 464 | TSPAN4  | ENSG00000214063 | 11:866001-866561:+          | 0.02127354 | 0.273280037   | 0.226505857     |
| 465 | AP2A2   | ENSG00000183020 | 11:994245-1000431:+         | 0.04362284 | 0.080265427   | 0.100354748     |
| 466 | BRSK2   | ENSG00000174672 | 11:1445458-1445570:+        | 0.00012228 | 0.162567882   | 0.086255707     |
| 467 | BRSK2   | ENSG00000174672 | 11:1445907-1449775:+        | 2.20E-06   | 0.205796012   | 0.261242938     |
| 468 | BRSK2   | ENSG00000174672 | 11:1449836-1450586:+        | 0.02652777 | 0.159729821   | 0.189297749     |
| 469 | BRSK2   | ENSG00000174672 | 11:1451419-1454484:+        | 4.65E-05   | 0.363464579   | 0.272559892     |
| 470 | BRSK2   | ENSG00000174672 | 11:1454608-1456347:+        | 1.52E-06   | 0.104177134   | 0.060236426     |
| 471 | BRSK2   | ENSG00000174672 | 11:1456687-1456954:+        | 6.51E-06   | 0.103716878   | 0.070898243     |
| 472 | BRSK2   | ENSG00000174672 | 11:1456687-1459191:+        | 0.04296541 | 0.121157996   | 0.086703858     |
| 473 | BRSK2   | ENSG00000174672 | 11:1457049-1459191:+        | 2.77E-05   | 0.146405922   | 0.104781571     |
| 474 | MOB2    | ENSG00000182208 | 11:1471419-1480392:-        | 0.01248418 | 0.153269927   | 0.123842309     |
| 475 | MOB2    | ENSG00000182208 | 11:1480486-1480724:-        | 0.00111728 | 0.233835373   | 0.177652738     |
| 476 | IFITM10 | ENSG00000244242 | 11:1735429-1747666:-        | 0.00016991 | 0.107054216   | 0.069080683     |
| 477 | NAP1L4  | ENSG00000205531 | 11:2945646-2949226:-        | 0.00784145 | 0.092564194   | 0.077623321     |
| 478 | NAP1L4  | ENSG00000205531 | 11:2945646-2951258:-        | 0.02020373 | 0.083740265   | 0.067969501     |
| 479 | NAP1L4  | ENSG00000205531 | 11:2949264-2951258:-        | 0.0050828  | 0.072131004   | 0.056571841     |
| 480 | NAP1L4  | ENSG00000205531 | 11:2951315-2951779:-        | 1.36E-05   | 0.116233666   | 0.081521925     |
| 481 | NAP1L4  | ENSG00000205531 | 11:2951809-2954526:-        | 1.16E-07   | 0.118403582   | 0.075936255     |
| 482 | CARS    | ENSG00000110619 | 11:3002053-3002540:-        | 0.00545699 | 0.216408705   | 0.180241391     |
| 483 | APBB1   | ENSG00000166313 | 11:6401688-6402081:-        | 0.0005676  | 0.050258049   | 0.047792946     |
| 484 | RRP8    | ENSG00000132275 | 11:6601055-6601148:-        | 0.00398113 | 0.240173099   | 0.187498385     |
| 485 | ILK     | ENSG00000166333 | 11:6604360-6608045:+        | 9.75E-05   | 0.176338104   | 0.238622417     |
| 486 | ILK     | ENSG00000166333 | 11:6608211-6608393:+        | 0.00123121 | 0.200729461   | 0.24964113      |
| 487 | ILK     | ENSG00000166333 | 11:6608489-6608693:+        | 0.03272281 | 0.17709466    | 0.204285569     |
| 488 | ILK     | ENSG00000166333 | 11:6610278-6610461:+        | 0.0028777  | 0.103122494   | 0.08302876      |
| 489 | TAF10   | ENSG00000166337 | 11:6611452-6611663:-        | 0.00075395 | 0.167867832   | 0.135442661     |
| 490 | MRPL17  | ENSG00000158042 | 11:6682815-6683122:-        | 0.01254761 | 0.244687007   | 0.205619752     |
| 491 | RIC3    | ENSG00000166405 | 11:8126804-8137377:-        | 0.04605343 | 0.074955418   | 0.088862071     |
| 492 | ST5     | ENSG00000166444 | 11:8698974-8699212:-        | 1.69E-06   | 0.152994663   | 0.109083901     |
| 493 | ST5     | ENSG00000166444 | 11:8710914-8711121:-        | 0.02366556 | 0.134176248   | 0.114975666     |
| 494 | ST5     | ENSG00000166444 | 11:8712735-8713997:-        | 0.00766854 | 0.109315176   | 0.086594864     |
| 495 | DENND5A | ENSG00000184014 | 11:9145815-9147029:-        | 0.00247183 | 0.090767938   | 0.065624764     |
| 496 | MICAL2  | ENSG00000133816 | 11:12241162-12242213:+      | 0.01313806 | 0.456930695   | 0.399310805     |
| 497 | MICAL2  | ENSG00000133816 | 11:12242772-12243986:+      | 2.50E-06   | 0.129430929   | 0.083160592     |
| 498 | MICAL2  | ENSG00000133816 | 11:12244112-12249183:+      | 0.00025686 | 0.077545937   | 0.061697118     |
| 499 | MICAL2  | ENSG00000133816 | 11:12244112-12255642:+      | 0.02988393 | 0.077932571   | 0.060820631     |
| 500 | MICAL2  | ENSG00000133816 | 11:12249246-12255642:+      | 3.61E-05   | 0.079540801   | 0.061278977     |
| 501 | PSMA1   | ENSG00000129084 | 11:14513887-14514402:-      | 0.01083473 | 0.104021691   | 0.128766666     |
| 502 | CYP2R1  | ENSG00000186104 | 11:14878297-14879113:-      | 1.33E-05   | 0.14445266    | 0.101096594     |
| 503 | ABCC8   | ENSG00000006071 | 11:17395930-17396915:-      | 0.00599043 | 0.454052805   | 0.391852623     |
| 504 | SAAL1   | ENSG00000166788 | 11:18081503-18083534:-      | 0.0017253  | 0.308002184   | 0.288025484     |
| 505 | PAX6    | ENSG00000007372 | 11:31800856-31801560:-      | 0.00145065 | 0.080580831   | 0.11560541      |
| 506 | PAX6    | ENSG00000007372 | 11:31801776-31801870:-      | 0.02537386 | 0.050860845   | 0.052019456     |
| 507 | CSTF3   | ENSG00000176102 | 11:33085773-33085894:-      | 0.02065677 | 0.095294624   | 0.072443066     |
| 508 | CSTF3   | ENSG00000176102 | 11:33141762-33141884:-      | 0.00012111 | 0.567517939   | 0.485031883     |
| 509 | NAT10   | ENSG00000135372 | 11:34134420-34134511:+      | 1.96E-08   | 0.1957237     | 0.104075786     |
| 510 | TTC17   | ENSG00000052841 | 11:43444209-43445930:+      | 0.00184027 | 0.148645421   | 0.138370716     |
| 511 | CRY2    | ENSG00000121671 | 11:45870532-45870841:+      | 0.0187936  | 0.197686787   | 0.179043394     |
| 512 | PEX16   | ENSG00000121680 | 11:45910962-45913818:-      | 7.01E-05   | 0.10609058    | 0.067594327     |

| S/N | Gene     | Ensembl ID      | Position of retained intron | p-value    | AD_IR_average | Cont_IR_average |
|-----|----------|-----------------|-----------------------------|------------|---------------|-----------------|
| 513 | AMBRA1   | ENSG00000110497 | 11:46433628-46434848:-      | 0.00024873 | 0.099503398   | 0.072162601     |
| 514 | ARHGAP1  | ENSG00000175220 | 11:46680282-46680486:-      | 0.00320577 | 0.161985007   | 0.129539726     |
| 515 | C11orf49 | ENSG00000149179 | 11:47155261-47157022:+      | 1.17E-07   | 0.126056834   | 0.081844575     |
| 516 | C11orf49 | ENSG00000149179 | 11:47157218-47157812:+      | 8.50E-07   | 0.129936907   | 0.088158365     |
| 517 | ARFGAP2  | ENSG00000149182 | 11:47168251-47171425:-      | 0.0250253  | 0.081054748   | 0.10545811      |
| 518 | ARFGAP2  | ENSG00000149182 | 11:47171800-47172280:-      | 0.00246654 | 0.094998246   | 0.099099186     |
| 519 | ARFGAP2  | ENSG00000149182 | 11:47172333-47173425:-      | 0.00228001 | 0.240111156   | 0.200149581     |
| 520 | ARFGAP2  | ENSG00000149182 | 11:47175098-47175181:-      | 0.006994   | 0.133892018   | 0.109291221     |
| 521 | ARFGAP2  | ENSG00000149182 | 11:47175313-47175850:-      | 0.00712792 | 0.118314837   | 0.10501543      |
| 522 | DDB2     | ENSG00000134574 | 11:47238001-47238137:+      | 0.00024998 | 0.275203134   | 0.223026886     |
| 523 | DDB2     | ENSG00000134574 | 11:47238183-47238799:+      | 0.00017916 | 0.187672922   | 0.146457355     |
| 524 | NR1H3    | ENSG00000025434 | 11:47268026-47268260:+      | 0.03699046 | 0.14366199    | 0.118511236     |
| 525 | MADD     | ENSG00000110514 | 11:47309042-47309280:+      | 0.00915388 | 0.184126301   | 0.153856453     |
| 526 | MADD     | ENSG00000110514 | 11:47326807-47328657:+      | 0.02159706 | 0.187105512   | 0.178444382     |
| 527 | SLC39A13 | ENSG00000165915 | 11:47412039-47412345:+      | 0.02362045 | 0.120317939   | 0.14325006      |
| 528 | KBTBD4   | ENSG00000123444 | 11:47573790-47575592:-      | 0.00130641 | 0.123766483   | 0.107169226     |
| 529 | FNBP4    | ENSG00000109920 | 11:47724778-47731373:-      | 0.00604368 | 0.154866606   | 0.190313032     |
| 530 | FNBP4    | ENSG00000109920 | 11:47751290-47752915:-      | 0.00181567 | 0.091791938   | 0.148036621     |
| 531 | VPS37C   | ENSG00000167987 | 11:61132539-61133254:-      | 0.02896784 | 0.14643117    | 0.127342917     |
| 532 | VPS37C   | ENSG00000167987 | 11:61134207-61138736:-      | 0.01311079 | 0.127973691   | 0.104189871     |
| 533 | CPSF7    | ENSG00000149532 | 11:61415784-61416104:-      | 0.00203039 | 0.137648989   | 0.189146616     |
| 534 | FADS1    | ENSG00000149485 | 11:61802926-61803031:-      | 0.04342037 | 0.15233192    | 0.132033875     |
| 535 | FADS3    | ENSG00000221968 | 11:61876963-61877510:-      | 8.73E-08   | 0.557067415   | 0.449547844     |
| 536 | TUT1     | ENSG00000149016 | 11:62576749-62576906:-      | 0.00136118 | 0.132242654   | 0.093658444     |
| 537 | TUT1     | ENSG00000149016 | 11:62577017-62577181:-      | 0.00523423 | 0.117556213   | 0.084695061     |
| 538 | MTA2     | ENSG00000149480 | 11:62594040-62594258:-      | 0.00223089 | 0.09776691    | 0.070349172     |
| 539 | EML3     | ENSG00000149499 | 11:62602678-62602758:-      | 0.00848752 | 0.116103693   | 0.087909231     |
| 540 | EML3     | ENSG00000149499 | 11:62604041-62604112:-      | 0.00017443 | 0.261922857   | 0.184143853     |
| 541 | EML3     | ENSG00000149499 | 11:62604201-62605112:-      | 0.0222839  | 0.214938344   | 0.170289839     |
| 542 | B3GAT3   | ENSG00000149541 | 11:62620671-62621865:-      | 0.0004864  | 0.094736704   | 0.069085414     |
| 543 | C11orf98 | ENSG00000278615 | 11:62664973-62665130:-      | 0.00201591 | 0.234788585   | 0.198470379     |
| 544 | UBXN1    | ENSG00000162191 | 11:62676639-62676812:-      | 0.01299854 | 0.100181835   | 0.078984435     |
| 545 | TMEM179  | ENSG00000185475 | 11:62789426-62789600:+      | 1.81E-07   | 0.290604549   | 0.217416897     |
| 546 | NXF1     | ENSG00000162231 | 11:62803978-62805328:-      | 0.04861047 | 0.212424246   | 0.186940982     |
| 547 | STX5     | ENSG00000162236 | 11:62825339-62825422:-      | 0.00156394 | 0.096082028   | 0.071715875     |
| 548 | C11orf84 | ENSG00000168005 | 11:63819002-63826927:+      | 7.18E-07   | 0.271716501   | 0.213806203     |
| 549 | MARK2    | ENSG00000072518 | 11:63898280-63898607:+      | 0.00055508 | 0.180258687   | 0.140743053     |
| 550 | MARK2    | ENSG00000072518 | 11:63905043-63908876:+      | 0.00021712 | 0.115994349   | 0.127682423     |
| 551 | NAA40    | ENSG00000110583 | 11:63954049-63954337:+      | 0.04957023 | 0.177435639   | 0.147891897     |
| 552 | NUDT22   | ENSG00000149761 | 11:64227132-64227567:+      | 0.02615424 | 0.213571995   | 0.198380012     |
| 553 | NUDT22   | ENSG00000149761 | 11:64229571-64229849:+      | 3.00E-05   | 0.282002915   | 0.212246482     |
| 554 | DNAJC4   | ENSG00000110011 | 11:64231964-64232429:+      | 0.00201228 | 0.125184506   | 0.099166643     |
| 555 | DNAJC4   | ENSG00000110011 | 11:64232865-64233893:+      | 0.03466391 | 0.104136839   | 0.091670087     |
| 556 | FKBP2    | ENSG00000173486 | 11:64242213-64242383:+      | 0.00013233 | 0.09670292    | 0.079902812     |
| 557 | PLCB3    | ENSG00000149782 | 11:64259244-64260028:+      | 0.03538727 | 0.088003138   | 0.068755602     |
| 558 | PLCB3    | ENSG00000149782 | 11:64262808-64263497:+      | 9.83E-05   | 0.265395493   | 0.189098877     |
| 559 | PLCB3    | ENSG00000149782 | 11:64263795-64264020:+      | 2.70E-05   | 0.156856533   | 0.109134921     |
| 560 | PLCB3    | ENSG00000149782 | 11:64265502-64265885:+      | 0.04897262 | 0.077031836   | 0.085752794     |
| 561 | PLCB3    | ENSG00000149782 | 11:64266404-64266494:+      | 0.02346064 | 0.159259695   | 0.114942143     |
| 562 | PLCB3    | ENSG00000149782 | 11:64266552-64267184:+      | 0.00361872 | 0.153217871   | 0.110846599     |
| 563 | GPR137   | ENSG00000173264 | 11:64287014-64287720:+      | 0.043091   | 0.135220487   | 0.116773914     |
| 564 | TRMT112  | ENSG00000173113 | 11:64317365-64317448:-      | 0.0041691  | 0.123212527   | 0.096107208     |
| 565 | CCDC88B  | ENSG00000168071 | 11:64351255-64351475:+      | 0.00084295 | 0.758523695   | 0.656505558     |
| 566 | CCDC88B  | ENSG00000168071 | 11:64355400-64355559:+      | 0.02927671 | 0.13501809    | 0.118428758     |
| 567 | RPS6KA4  | ENSG00000162302 | 11:64360592-64361133:+      | 0.00079838 | 0.29582822    | 0.266573719     |
| 568 | RPS6KA4  | ENSG00000162302 | 11:64361241-64361468:+      | 0.00305529 | 0.100002612   | 0.072424039     |
| 569 | RPS6KA4  | ENSG00000162302 | 11:64368260-64368467:+      | 0.00660684 | 0.154207002   | 0.122737692     |



| S/N | Gene    | Ensembl ID      | Position of retained intron | p-value    | AD_IR_average | Cont_IR_average |
|-----|---------|-----------------|-----------------------------|------------|---------------|-----------------|
| 570 | RPS6KA4 | ENSG00000162302 | 11:64368797-64369445:+      | 2.38E-05   | 0.212949651   | 0.134954696     |
| 571 | RPS6KA4 | ENSG00000162302 | 11:64369619-64369698:+      | 0.00034213 | 0.151517735   | 0.097728884     |
| 572 | MAP4K2  | ENSG00000168067 | 11:64797380-64797500:-      | 6.67E-05   | 0.281311134   | 0.214144457     |
| 573 | MAP4K2  | ENSG00000168067 | 11:64802121-64802418:-      | 0.00272447 | 0.130758144   | 0.101339302     |
| 574 | PPP2R5B | ENSG00000068971 | 11:64928158-64928294:+      | 0.01308631 | 0.14498487    | 0.130129105     |
| 575 | PPP2R5B | ENSG00000068971 | 11:64931489-64931558:+      | 7.23E-05   | 0.304268805   | 0.23651671      |
| 576 | PPP2R5B | ENSG00000068971 | 11:64931868-64932764:+      | 7.27E-06   | 0.100076541   | 0.073496464     |
| 577 | TM7SF2  | ENSG00000149809 | 11:65113414-65113490:+      | 0.00533998 | 0.20326161    | 0.153845492     |
| 578 | TM7SF2  | ENSG00000149809 | 11:65114832-65114912:+      | 0.00043918 | 0.131184683   | 0.08683466      |
| 579 | TM7SF2  | ENSG00000149809 | 11:65115394-65115475:+      | 0.02179549 | 0.285626854   | 0.246439065     |
| 580 | SYVN1   | ENSG00000162298 | 11:65128714-65129728:-      | 0.00087558 | 0.290030085   | 0.248949364     |
| 581 | SYVN1   | ENSG00000162298 | 11:65132351-65132731:-      | 0.01024691 | 0.360144012   | 0.323452195     |
| 582 | SYVN1   | ENSG00000162298 | 11:65132780-65132921:-      | 0.02391819 | 0.116175563   | 0.098195821     |
| 583 | CAPN1   | ENSG00000014216 | 11:65187298-65187954:+      | 0.02416048 | 0.10521129    | 0.131675022     |
| 584 | CAPN1   | ENSG00000014216 | 11:65205721-65206462:+      | 0.02329515 | 0.153554255   | 0.129532181     |
| 585 | CAPN1   | ENSG00000014216 | 11:65210872-65211259:+      | 0.03254756 | 0.138005423   | 0.11319063      |
| 586 | DPF2    | ENSG00000133884 | 11:65344069-65344579:+      | 0.00014497 | 0.25922089    | 0.193686657     |
| 587 | DPF2    | ENSG00000133884 | 11:65344621-65345665:+      | 0.0013644  | 0.234452339   | 0.17953341      |
| 588 | FRMD8   | ENSG00000126391 | 11:65399859-65400723:+      | 0.03715757 | 0.224037329   | 0.195083339     |
| 589 | FRMD8   | ENSG00000126391 | 11:65405068-65411241:+      | 0.00217064 | 0.186812688   | 0.245242688     |
| 590 | SCYL1   | ENSG00000142186 | 11:65526350-65526782:+      | 0.0003232  | 0.200944043   | 0.161389112     |
| 591 | SCYL1   | ENSG00000142186 | 11:65526873-65526961:+      | 8.63E-05   | 0.097010988   | 0.069104715     |
| 592 | SCYL1   | ENSG00000142186 | 11:65538182-65538269:+      | 0.00249892 | 0.288632951   | 0.228930891     |
| 593 | LTBP3   | ENSG00000168056 | 11:65551224-65551401:-      | 8.18E-07   | 0.184770956   | 0.097154255     |
| 594 | LTBP3   | ENSG00000168056 | 11:65551474-65551547:-      | 2.41E-05   | 0.321254249   | 0.222822739     |
| 595 | LTBP3   | ENSG00000168056 | 11:65551564-65551971:-      | 6.91E-06   | 0.398474134   | 0.288397087     |
| 596 | LTBP3   | ENSG00000168056 | 11:65552406-65552859:-      | 0.00726299 | 0.078933666   | 0.062970394     |
| 597 | MAP3K11 | ENSG00000173327 | 11:65606081-65606690:-      | 1.36E-12   | 0.147815675   | 0.076192599     |
| 598 | PCNX3   | ENSG00000197136 | 11:65634356-65634537:+      | 0.04413471 | 0.093582112   | 0.077495323     |
| 599 | SIPA1   | ENSG00000213445 | 11:65649480-65649560:+      | 0.00118919 | 0.091862306   | 0.134799967     |
| 600 | SIPA1   | ENSG00000213445 | 11:65650192-65650400:+      | 0.04762615 | 0.095953854   | 0.113725321     |
| 601 | RELA    | ENSG00000173039 | 11:65655000-65655687:-      | 4.03E-10   | 0.506187444   | 0.328691181     |
| 602 | RELA    | ENSG00000173039 | 11:65658499-65658717:-      | 0.00027983 | 0.408851073   | 0.339512312     |
| 603 | KAT5    | ENSG00000172977 | 11:65713503-65713592:+      | 0.00107562 | 0.092656265   | 0.084915571     |
| 604 | KAT5    | ENSG00000172977 | 11:65718954-65719046:+      | 1.78E-06   | 0.437412878   | 0.361346701     |
| 605 | SNX32   | ENSG00000172803 | 11:65850855-65851054:+      | 0.02858525 | 0.241506645   | 0.195895319     |
| 606 | MUS81   | ENSG00000172732 | 11:65863205-65863409:+      | 0.00874503 | 0.100135532   | 0.082438696     |
| 607 | MUS81   | ENSG00000172732 | 11:65865323-65865810:+      | 0.01715528 | 0.143255093   | 0.122936713     |
| 608 | EFEMP2  | ENSG00000172638 | 11:65868629-65869856:-      | 0.01557361 | 0.162218578   | 0.135364244     |
| 609 | EFEMP2  | ENSG00000172638 | 11:65870658-65871156:-      | 0.00337133 | 0.146574229   | 0.108239819     |
| 610 | EFEMP2  | ENSG00000172638 | 11:65871363-65871969:-      | 1.16E-06   | 0.281839718   | 0.20133361      |
| 611 | EFEMP2  | ENSG00000172638 | 11:65872018-65872243:-      | 4.94E-11   | 0.13871835    | 0.075900549     |
| 612 | FIBP    | ENSG00000172500 | 11:65884656-65884934:-      | 0.00059826 | 0.249992305   | 0.191636334     |
| 613 | FIBP    | ENSG00000172500 | 11:65887726-65887933:-      | 1.83E-06   | 0.201410294   | 0.119746321     |
| 614 | SF3B2   | ENSG00000087365 | 11:66058405-66058829:+      | 0.02184804 | 0.382998171   | 0.364673122     |
| 615 | KLC2    | ENSG00000174996 | 11:66263036-66263659:+      | 1.29E-05   | 0.156224267   | 0.107432188     |
| 616 | KLC2    | ENSG00000174996 | 11:66266490-66266872:+      | 0.00452284 | 0.088536135   | 0.065837918     |
| 617 | YIF1A   | ENSG00000174851 | 11:66285536-66285700:-      | 0.0005074  | 0.293491178   | 0.226570427     |
| 618 | YIF1A   | ENSG00000174851 | 11:66285758-66287597:-      | 2.97E-08   | 0.363590905   | 0.253469203     |
| 619 | YIF1A   | ENSG00000174851 | 11:66287676-66287811:-      | 8.12E-12   | 0.329934489   | 0.183810961     |
| 620 | YIF1A   | ENSG00000174851 | 11:66287916-66288080:-      | 3.67E-08   | 0.295181155   | 0.190569965     |
| 621 | YIF1A   | ENSG00000174851 | 11:66288292-66288954:-      | 1.00E-07   | 0.359981037   | 0.243851352     |
| 622 | BRMS1   | ENSG00000174744 | 11:66341046-66341205:-      | 0.04130963 | 0.095541242   | 0.111129631     |
| 623 | BRMS1   | ENSG00000174744 | 11:66342241-66344971:-      | 0.01163918 | 0.398923915   | 0.354981284     |
| 624 | SLC29A2 | ENSG00000174669 | 11:66366021-66366125:-      | 0.00763083 | 0.403637476   | 0.348809481     |
| 625 | SLC29A2 | ENSG00000174669 | 11:66366564-66367463:-      | 9.93E-05   | 0.449983329   | 0.366330455     |
| 626 | BBS1    | ENSG00000174483 | 11:66510706-66511012:+      | 7.30E-07   | 0.204646316   | 0.127466362     |



| S/N | Gene     | Ensembl ID      | Position of retained intron | p-value    | AD_IR_average | Cont_IR_average |
|-----|----------|-----------------|-----------------------------|------------|---------------|-----------------|
| 627 | CTSF     | ENSG00000174080 | 11:66564146-66564557:-      | 3.46E-08   | 0.426877354   | 0.317746455     |
| 628 | CTSF     | ENSG00000174080 | 11:66568082-66568273:-      | 9.05E-06   | 0.250620022   | 0.171274721     |
| 629 | SPTBN2   | ENSG00000173898 | 11:66688849-66689095:-      | 0.01634462 | 0.08211647    | 0.109084345     |
| 630 | SPTBN2   | ENSG00000173898 | 11:66721262-66721349:-      | 0.01488148 | 0.021893195   | 0.033034701     |
| 631 | C11orf80 | ENSG00000173715 | 11:66838445-66842848:+      | 6.89E-05   | 0.17447031    | 0.13874479      |
| 632 | RCE1     | ENSG00000173653 | 11:66843861-66843955:+      | 0.00321857 | 0.117491734   | 0.083621666     |
| 633 | RCE1     | ENSG00000173653 | 11:66844039-66844285:+      | 0.00900569 | 0.135831588   | 0.110168248     |
| 634 | RCE1     | ENSG00000173653 | 11:66845237-66845499:+      | 0.00152287 | 0.197100955   | 0.195094171     |
| 635 | RCE1     | ENSG00000173653 | 11:66845562-66845859:+      | 2.08E-05   | 0.218204244   | 0.204426013     |
| 636 | PC       | ENSG00000173599 | 11:66850464-66850673:-      | 0.01210423 | 0.090581112   | 0.114410895     |
| 637 | LRFN4    | ENSG00000173621 | 11:66859093-66859636:+      | 0.00210439 | 0.189902909   | 0.143225196     |
| 638 | GRK2     | ENSG00000173020 | 11:67282365-67282434:+      | 0.04996941 | 0.143175965   | 0.114127822     |
| 639 | ANKRD13D | ENSG00000172932 | 11:67290213-67290321:+      | 0.0144467  | 0.103155357   | 0.122959716     |
| 640 | ANKRD13D | ENSG00000172932 | 11:67292180-67299057:+      | 9.62E-14   | 0.513746951   | 0.360669727     |
| 641 | ANKRD13D | ENSG00000172932 | 11:67299124-67299529:+      | 2.13E-09   | 0.627010122   | 0.536233052     |
| 642 | ANKRD13D | ENSG00000172932 | 11:67299611-67299826:+      | 2.78E-05   | 0.077831683   | 0.057143725     |
| 643 | ANKRD13D | ENSG00000172932 | 11:67301398-67301487:+      | 0.01199068 | 0.106181894   | 0.083873403     |
| 644 | SSH3     | ENSG00000172830 | 11:67307436-67307548:+      | 0.00278233 | 0.75323378    | 0.696704468     |
| 645 | SSH3     | ENSG00000172830 | 11:67307939-67308173:+      | 1.81E-05   | 0.16385136    | 0.11271451      |
| 646 | SSH3     | ENSG00000172830 | 11:67308302-67308411:+      | 5.85E-07   | 0.152882786   | 0.093091601     |
| 647 | AP003419 | ENSG00000256514 | 11:67352019-67352690:-      | 0.04543501 | 0.141509333   | 0.109823071     |
| 648 | RPS6KB2  | ENSG00000175634 | 11:67433042-67433125:+      | 6.07E-05   | 0.168246205   | 0.141771269     |
| 649 | ORAOV1   | ENSG00000149716 | 11:69668012-69671748:-      | 0.0115083  | 0.104959074   | 0.121651809     |
| 650 | ORAOV1   | ENSG00000149716 | 11:69671819-69673215:-      | 0.00908491 | 0.131855567   | 0.15501373      |
| 651 | ORAOV1   | ENSG00000149716 | 11:69673321-69675189:-      | 0.00088513 | 0.095399526   | 0.123675187     |
| 652 | CTTN     | ENSG00000085733 | 11:70415717-70417012:+      | 0.03491377 | 0.185905035   | 0.157560729     |
| 653 | CTTN     | ENSG00000085733 | 11:70417123-70419745:+      | 0.00615071 | 0.154292527   | 0.126645978     |
| 654 | NADSYN1  | ENSG00000172890 | 11:71481404-71481922:+      | 0.00295814 | 0.088316072   | 0.069490074     |
| 655 | IL18BP   | ENSG00000137496 | 11:72000012-72000350:+      | 0.04711589 | 0.079654639   | 0.102357857     |
| 656 | NUMA1    | ENSG00000137497 | 11:72006263-72007188:-      | 0.00636121 | 0.122982939   | 0.1037366       |
| 657 | ARAP1    | ENSG00000186635 | 11:72693470-72693691:-      | 0.00166825 | 0.175168348   | 0.132010313     |
| 658 | ARAP1    | ENSG00000186635 | 11:72696654-72696982:-      | 5.06E-06   | 0.126343374   | 0.078691414     |
| 659 | ARAP1    | ENSG00000186635 | 11:72697486-72697597:-      | 0.0081017  | 0.211531518   | 0.161180797     |
| 660 | ARAP1    | ENSG00000186635 | 11:72697649-72697910:-      | 0.00176614 | 0.19528184    | 0.14263884      |
| 661 | STARD10  | ENSG00000214530 | 11:72755753-72757766:-      | 0.00108765 | 0.201143866   | 0.147400704     |
| 662 | STARD10  | ENSG00000214530 | 11:72755753-72758529:-      | 0.00056564 | 0.19433817    | 0.140208044     |
| 663 | STARD10  | ENSG00000214530 | 11:72757884-72758529:-      | 0.00011806 | 0.197903415   | 0.137237236     |
| 664 | STARD10  | ENSG00000214530 | 11:72758633-72759233:-      | 0.00345377 | 0.113159539   | 0.085492605     |
| 665 | ATG16L2  | ENSG00000168010 | 11:72825407-72826172:+      | 0.04679533 | 0.284958585   | 0.243163618     |
| 666 | ATG16L2  | ENSG00000168010 | 11:72826243-72826517:+      | 0.00284732 | 0.270883073   | 0.210234545     |
| 667 | ATG16L2  | ENSG00000168010 | 11:72827293-72828358:+      | 1.09E-06   | 0.26386997    | 0.19416513      |
| 668 | ATG16L2  | ENSG00000168010 | 11:72828508-72828728:+      | 0.00039792 | 0.227815422   | 0.174134461     |
| 669 | ATG16L2  | ENSG00000168010 | 11:72828984-72829302:+      | 0.03747749 | 0.158368665   | 0.138178549     |
| 670 | FCHSD2   | ENSG00000137478 | 11:72843328-72843448:-      | 0.00024921 | 0.124894892   | 0.187949052     |
| 671 | ARHGEF17 | ENSG00000110237 | 11:73362734-73363205:+      | 0.00154121 | 0.313582435   | 0.252595604     |
| 672 | ARHGEF17 | ENSG00000110237 | 11:73364239-73364451:+      | 0.00041005 | 0.171574546   | 0.113693419     |
| 673 | ARHGEF17 | ENSG00000110237 | 11:73364600-73365389:+      | 0.00760316 | 0.311265307   | 0.263051688     |
| 674 | C2CD3    | ENSG00000168014 | 11:74013525-74028286:-      | 3.76E-05   | 0.117515202   | 0.089252792     |
| 675 | ARRB1    | ENSG00000137486 | 11:75277448-75278608:-      | 2.52E-05   | 0.092534354   | 0.061485347     |
| 676 | ARRB1    | ENSG00000137486 | 11:75282021-75283286:-      | 4.13E-07   | 0.14841897    | 0.0842685       |
| 677 | RPS3     | ENSG00000149273 | 11:75404868-75421726:+      | 0.00239813 | 0.011922298   | 0.009315118     |
| 678 | USP35    | ENSG00000118369 | 11:78210744-78213645:+      | 3.47E-05   | 0.112534244   | 0.076932175     |
| 679 | GAB2     | ENSG00000033327 | 11:78219415-78220318:-      | 0.00149354 | 0.244847161   | 0.189138422     |
| 680 | GAB2     | ENSG00000033327 | 11:78220444-78221676:-      | 0.00277016 | 0.223425885   | 0.177711801     |
| 681 | GAB2     | ENSG00000033327 | 11:78221779-78222104:-      | 0.00640171 | 0.172266139   | 0.136027628     |
| 682 | GAB2     | ENSG00000033327 | 11:78222195-78223411:-      | 0.04754531 | 0.144184034   | 0.122228802     |
| 683 | PCF11    | ENSG00000165494 | 11:83182491-83183037:+      | 0.00294321 | 0.13157034    | 0.098643519     |

| S/N | Gene    | Ensembl ID      | Position of retained intron | p-value    | AD_IR_average | Cont_IR_average |
|-----|---------|-----------------|-----------------------------|------------|---------------|-----------------|
| 684 | TMEM126 | ENSG00000171204 | 11:85635778-85636045:+      | 0.00019751 | 0.198204738   | 0.258518857     |
| 685 | TMEM126 | ENSG00000171202 | 11:85648089-85650248:+      | 0.02289756 | 0.125973239   | 0.099658617     |
| 686 | TMEM126 | ENSG00000171202 | 11:85650341-85654062:+      | 1.51E-05   | 0.100112966   | 0.069712788     |
| 687 | TMEM126 | ENSG00000171202 | 11:85654256-85655593:+      | 4.64E-06   | 0.127417005   | 0.087211049     |
| 688 | TMEM126 | ENSG00000171202 | 11:85655708-85656308:+      | 1.26E-05   | 0.133578413   | 0.097511261     |
| 689 | CEP295  | ENSG00000166004 | 11:93727637-93728680:+      | 0.00193582 | 0.403427195   | 0.348061353     |
| 690 | CEP295  | ENSG00000166004 | 11:93728821-93729433:+      | 1.58E-06   | 0.352257463   | 0.2800926       |
| 691 | CEP295  | ENSG00000166004 | 11:93729530-93729610:+      | 4.92E-09   | 0.37061139    | 0.283283339     |
| 692 | CEP295  | ENSG00000166004 | 11:93729969-93730048:+      | 1.58E-10   | 0.250302343   | 0.172621065     |
| 693 | TAF1D   | ENSG00000166012 | 11:93736304-93736693:-      | 0.01243485 | 0.175827299   | 0.12154731      |
| 694 | MED17   | ENSG00000042429 | 11:93797719-93801834:+      | 0.04398724 | 0.122147967   | 0.091680232     |
| 695 | MRE11   | ENSG00000020922 | 11:94420181-94429910:-      | 0.01776645 | 0.101153257   | 0.077519542     |
| 696 | CWC15   | ENSG00000150316 | 11:94971065-94971374:-      | 0.00022196 | 0.10917483    | 0.081656612     |
| 697 | CWC15   | ENSG00000150316 | 11:94972193-94973497:-      | 0.00023401 | 0.102788903   | 0.073453036     |
| 698 | FAM76B  | ENSG00000077458 | 11:95771650-95775921:-      | 4.34E-06   | 0.100488744   | 0.047356649     |
| 699 | CCDC82  | ENSG00000149231 | 11:96353714-96358992:-      | 2.61E-05   | 0.245217427   | 0.162858109     |
| 700 | GRIA4   | ENSG00000152578 | 11:105974444-105979574:+    | 0.00018882 | 0.133058002   | 0.087798174     |
| 701 | USP28   | ENSG00000048028 | 11:113803281-113803797:-    | 0.00130482 | 0.192299479   | 0.133615699     |
| 702 | USP28   | ENSG00000048028 | 11:113803877-113804672:-    | 0.00348189 | 0.152999654   | 0.102030818     |
| 703 | ZBTB16  | ENSG00000109906 | 11:114242337-114247197:+    | 0.00208721 | 0.182501557   | 0.133921387     |
| 704 | REXO2   | ENSG00000076043 | 11:114447879-114449845:+    | 0.00102939 | 0.085418819   | 0.068287595     |
| 705 | BUD13   | ENSG00000137656 | 11:116757950-116758268:-    | 2.27E-05   | 0.087739851   | 0.142446871     |
| 706 | BUD13   | ENSG00000137656 | 11:116758407-116759073:-    | 0.00192141 | 0.068242606   | 0.099617401     |
| 707 | BUD13   | ENSG00000137656 | 11:116759179-116760734:-    | 0.0169206  | 0.114242391   | 0.139965101     |
| 708 | SIK3    | ENSG00000160584 | 11:116845629-116846382:-    | 0.00032193 | 0.144307299   | 0.11125271      |
| 709 | SIDT2   | ENSG00000149577 | 11:117183878-117184073:+    | 0.00162332 | 0.101430541   | 0.073840547     |
| 710 | SIDT2   | ENSG00000149577 | 11:117186223-117186583:+    | 0.00112948 | 0.307600902   | 0.255391273     |
| 711 | SIDT2   | ENSG00000149577 | 11:117186636-117186989:+    | 0.0404111  | 0.212164207   | 0.186608391     |
| 712 | SIDT2   | ENSG00000149577 | 11:117187699-117188707:+    | 0.02612317 | 0.09541183    | 0.120272187     |
| 713 | SIDT2   | ENSG00000149577 | 11:117188826-117189168:+    | 0.01540167 | 0.149571199   | 0.121904736     |
| 714 | SIDT2   | ENSG00000149577 | 11:117192650-117192819:+    | 6.37E-05   | 0.273409976   | 0.196738456     |
| 715 | SIDT2   | ENSG00000149577 | 11:117192866-117193152:+    | 0.0019572  | 0.291529463   | 0.243470639     |
| 716 | PCSK7   | ENSG00000160613 | 11:117218568-117219056:-    | 0.02449963 | 0.140321421   | 0.120274136     |
| 717 | CEP164  | ENSG00000110274 | 11:117408032-117408889:+    | 0.00013759 | 0.194967488   | 0.140549117     |
| 718 | IFT46   | ENSG00000118096 | 11:118557045-118559784:-    | 0.04372601 | 0.067600118   | 0.073581579     |
| 719 | PHLDB1  | ENSG00000019144 | 11:118655690-118656682:+    | 0.0120066  | 0.097473246   | 0.103430681     |
| 720 | CCDC84  | ENSG00000186166 | 11:119010830-119011220:+    | 0.03683709 | 0.220081598   | 0.194233379     |
| 721 | CCDC84  | ENSG00000186166 | 11:119012003-119012148:+    | 6.22E-05   | 0.189803676   | 0.154057922     |
| 722 | CCDC84  | ENSG00000186166 | 11:119012254-119013231:+    | 1.98E-05   | 0.224169128   | 0.184282266     |
| 723 | TRAPPC4 | ENSG00000196655 | 11:119020253-119021759:+    | 0.00178242 | 0.122248915   | 0.101001369     |
| 724 | HMBS    | ENSG00000256269 | 11:119089131-119089216:+    | 0.01064275 | 0.13974061    | 0.098396841     |
| 725 | C2CD2L  | ENSG00000172375 | 11:119112874-119113610:+    | 0.0003677  | 0.133980912   | 0.09552293      |
| 726 | MCAM    | ENSG00000076706 | 11:119311185-119311279:-    | 0.00352894 | 0.091020779   | 0.142182448     |
| 727 | ROBO3   | ENSG00000154134 | 11:124878796-124879189:+    | 0.03496796 | 0.260857717   | 0.216725838     |
| 728 | FOXRED1 | ENSG00000110074 | 11:126273079-126273335:+    | 0.01989733 | 0.462961829   | 0.422736987     |
| 729 | THYN1   | ENSG00000151500 | 11:134248484-134248808:-    | 0.01279347 | 0.160889141   | 0.137540562     |
| 730 | THYN1   | ENSG00000151500 | 11:134248959-134249166:-    | 0.00722871 | 0.249463668   | 0.217658156     |
| 731 | WNK1    | ENSG00000060237 | 12:900670-907846:+          | 2.83E-05   | 0.148375163   | 0.106937647     |
| 732 | ITFG2   | ENSG00000111203 | 12:2821596-2821691:+        | 3.22E-05   | 0.3555625     | 0.274541413     |
| 733 | ITFG2   | ENSG00000111203 | 12:2821792-2822793:+        | 0.01435959 | 0.131500916   | 0.108060209     |
| 734 | DYRK4   | ENSG0000010219  | 12:4610284-4612542:+        | 0.01271468 | 0.141655834   | 0.11536691      |
| 735 | NCAPD2  | ENSG0000010292  | 12:6529958-6530690:+        | 8.60E-08   | 0.19200133    | 0.268429688     |
| 736 | NCAPD2  | ENSG0000010292  | 12:6530817-6530920:+        | 1.64E-06   | 0.106709409   | 0.161046865     |
| 737 | IFFO1   | ENSG0000010295  | 12:6548157-6548424:-        | 0.03375884 | 0.057717066   | 0.072956815     |
| 738 | MLF2    | ENSG00000089693 | 12:6748547-6748769:-        | 0.04378253 | 0.127144102   | 0.110530499     |
| 739 | PTMS    | ENSG00000159335 | 12:6769999-6770156:+        | 0.00584425 | 0.094122037   | 0.067426291     |
| 740 | PTMS    | ENSG00000159335 | 12:6770218-6770391:+        | 0.00805916 | 0.095299617   | 0.071022018     |

| S/N | Gene     | Ensembl ID      | Position of retained intron | p-value    | AD_IR_average | Cont_IR_average |
|-----|----------|-----------------|-----------------------------|------------|---------------|-----------------|
| 741 | GPR162   | ENSG00000250510 | 12:6825673-6826195:+        | 0.00165618 | 0.219817605   | 0.169242416     |
| 742 | P3H3     | ENSG00000110811 | 12:6831914-6833591:+        | 0.02708526 | 0.210607549   | 0.176474244     |
| 743 | P3H3     | ENSG00000110811 | 12:6833809-6833924:+        | 0.00087203 | 0.400241841   | 0.45486961      |
| 744 | P3H3     | ENSG00000110811 | 12:6837086-6837422:+        | 0.03300732 | 0.466459246   | 0.411836186     |
| 745 | ENO2     | ENSG00000111674 | 12:6916729-6917037:+        | 0.00414437 | 0.158730383   | 0.145498018     |
| 746 | PHB2     | ENSG00000215021 | 12:6967779-6967891:-        | 7.07E-08   | 0.15315036    | 0.097054471     |
| 747 | LPCAT3   | ENSG00000111684 | 12:6976891-6977133:-        | 2.04E-07   | 0.137531      | 0.100461421     |
| 748 | LPCAT3   | ENSG00000111684 | 12:6977262-6977366:-        | 0.00011349 | 0.177221235   | 0.144549748     |
| 749 | LPCAT3   | ENSG00000111684 | 12:6977525-6977597:-        | 0.00151646 | 0.415143195   | 0.341454169     |
| 750 | MAGOHB   | ENSG00000111196 | 12:10606374-10607853:-      | 0.00472493 | 0.154036538   | 0.118455671     |
| 751 | GOLT1B   | ENSG00000111711 | 12:21512376-21515668:+      | 0.00539505 | 0.121047653   | 0.164083162     |
| 752 | C2CD5    | ENSG00000111731 | 12:22457161-22458483:-      | 0.0324014  | 0.093080313   | 0.076053257     |
| 753 | FGFR1OP2 | ENSG00000111790 | 12:26957743-26960514:+      | 0.01083939 | 0.053487601   | 0.050542256     |
| 754 | KIAA1551 | ENSG00000174718 | 12:31985957-31987238:+      | 0.00270772 | 0.457393756   | 0.379558468     |
| 755 | KIAA1551 | ENSG00000174718 | 12:31987322-31992377:+      | 0.00042039 | 0.182674198   | 0.142332018     |
| 756 | YARS2    | ENSG00000139131 | 12:32747363-32749936:-      | 0.00155147 | 0.145729529   | 0.116236413     |
| 757 | RAPGEF3  | ENSG00000079337 | 12:47748931-47749389:-      | 0.00535064 | 0.508762378   | 0.414401675     |
| 758 | HDAC7    | ENSG00000061273 | 12:47785471-47785751:-      | 0.00035341 | 0.407270915   | 0.476872792     |
| 759 | PFKM     | ENSG00000152556 | 12:48135038-48135290:+      | 7.26E-05   | 0.305405006   | 0.243390577     |
| 760 | KANSL2   | ENSG00000139620 | 12:48655060-48660365:-      | 0.00252296 | 0.078058341   | 0.09631091      |
| 761 | ADCY6    | ENSG00000174233 | 12:48768716-48768936:-      | 5.38E-06   | 0.082529356   | 0.123862197     |
| 762 | ADCY6    | ENSG00000174233 | 12:48772424-48772507:-      | 0.01195184 | 0.062588222   | 0.083866585     |
| 763 | PRKAG1   | ENSG00000181929 | 12:49003595-49003756:-      | 0.02420428 | 0.208344634   | 0.196951119     |
| 764 | KMT2D    | ENSG00000167548 | 12:49030768-49030892:-      | 0.04139707 | 0.0819046     | 0.099264293     |
| 765 | LMBR1L   | ENSG00000139636 | 12:49097739-49097943:-      | 7.06E-05   | 0.207434654   | 0.15865814      |
| 766 | LMBR1L   | ENSG00000139636 | 12:49098105-49100387:-      | 0.00201779 | 0.10044635    | 0.081086584     |
| 767 | LMBR1L   | ENSG00000139636 | 12:49100454-49100555:-      | 0.00321575 | 0.301832341   | 0.25080987      |
| 768 | LMBR1L   | ENSG00000139636 | 12:49101323-49101471:-      | 0.00011747 | 0.27550039    | 0.202248648     |
| 769 | LMBR1L   | ENSG00000139636 | 12:49101549-49102119:-      | 3.88E-05   | 0.332437939   | 0.259919417     |
| 770 | LMBR1L   | ENSG00000139636 | 12:49102196-49102292:-      | 5.17E-05   | 0.28869278    | 0.218431056     |
| 771 | LMBR1L   | ENSG00000139636 | 12:49102951-49103090:-      | 0.00012988 | 0.185294687   | 0.137352323     |
| 772 | PRPF40B  | ENSG00000110844 | 12:49631544-49631859:+      | 0.01328304 | 0.107468521   | 0.079768824     |
| 773 | PRPF40B  | ENSG00000110844 | 12:49635263-49635364:+      | 0.02027287 | 0.090365318   | 0.070723015     |
| 774 | PRPF40B  | ENSG00000110844 | 12:49636849-49637469:+      | 0.00426198 | 0.319629402   | 0.367866039     |
| 775 | PRPF40B  | ENSG00000110844 | 12:49642024-49642234:+      | 0.02742352 | 0.287137927   | 0.24549696      |
| 776 | PRPF40B  | ENSG00000110844 | 12:49643752-49643860:+      | 0.01509046 | 0.197269171   | 0.162851553     |
| 777 | FMNL3    | ENSG00000161791 | 12:49652212-49653225:-      | 0.01448281 | 0.11308447    | 0.142094717     |
| 778 | NCKAP5L  | ENSG00000167566 | 12:49801967-49802957:-      | 0.00150212 | 0.388354374   | 0.337814169     |
| 779 | ASIC1    | ENSG00000110881 | 12:50077363-50077999:+      | 0.00610781 | 0.217444198   | 0.175865935     |
| 780 | ASIC1    | ENSG00000110881 | 12:50078577-50078923:+      | 7.48E-05   | 0.269185829   | 0.206418132     |
| 781 | ASIC1    | ENSG00000110881 | 12:50078980-50079901:+      | 0.00017931 | 0.394602459   | 0.320993221     |
| 782 | ASIC1    | ENSG00000110881 | 12:50080589-50081101:+      | 0.00052902 | 0.181882504   | 0.136664638     |
| 783 | ASIC1    | ENSG00000110881 | 12:50081181-50081259:+      | 0.00136703 | 0.215698563   | 0.166251249     |
| 784 | ASIC1    | ENSG00000110881 | 12:50081364-50081544:+      | 0.00020083 | 0.140561856   | 0.102527206     |
| 785 | SMARCD1  | ENSG00000066117 | 12:50086878-50087362:+      | 0.0108944  | 0.167905777   | 0.147965716     |
| 786 | CERS5    | ENSG00000139624 | 12:50134702-50135731:-      | 3.37E-05   | 0.064790333   | 0.089502306     |
| 787 | DIP2B    | ENSG00000066084 | 12:50678876-50680671:+      | 0.04558436 | 0.09217724    | 0.14062701      |
| 788 | POU6F1   | ENSG00000184271 | 12:51196927-51197769:-      | 0.00648476 | 0.191826338   | 0.156882831     |
| 789 | POU6F1   | ENSG00000184271 | 12:51204368-51206788:-      | 0.00134632 | 0.086270989   | 0.126540708     |
| 790 | NR4A1    | ENSG00000123358 | 12:52057259-52057351:+      | 8.58E-07   | 0.069615991   | 0.037024187     |
| 791 | NR4A1    | ENSG00000123358 | 12:52057530-52058687:+      | 0.00021497 | 0.072825866   | 0.05262938      |
| 792 | TNS2     | ENSG00000111077 | 12:53055845-53057012:+      | 0.03550486 | 0.191105906   | 0.228947703     |
| 793 | CSAD     | ENSG00000139631 | 12:53172436-53172521:-      | 0.00073471 | 0.230905465   | 0.179324261     |
| 794 | AAAS     | ENSG00000094914 | 12:53307713-53307844:-      | 0.00036991 | 0.19100208    | 0.138209173     |
| 795 | AAAS     | ENSG00000094914 | 12:53307929-53308051:-      | 0.00087929 | 0.239419415   | 0.183974783     |
| 796 | AAAS     | ENSG00000094914 | 12:53314441-53314750:-      | 0.00630389 | 0.125828665   | 0.117935382     |
| 797 | AAAS     | ENSG00000094914 | 12:53314849-53315093:-      | 0.00147063 | 0.106056574   | 0.090375749     |

| S/N | Gene     | Ensembl ID      | Position of retained intron | p-value    | AD_IR_average | Cont_IR_average |
|-----|----------|-----------------|-----------------------------|------------|---------------|-----------------|
| 798 | AAAS     | ENSG00000094914 | 12:53315426-53315726:-      | 0.00329043 | 0.139822552   | 0.107898187     |
| 799 | PCBP2    | ENSG00000197111 | 12:53467293-53468776:+      | 8.57E-06   | 0.056245155   | 0.075208001     |
| 800 | MAP3K12  | ENSG00000139625 | 12:53481280-53481940:-      | 0.00097435 | 0.113265839   | 0.085483271     |
| 801 | MAP3K12  | ENSG00000139625 | 12:53482369-53482564:-      | 0.00329996 | 0.189270088   | 0.234538108     |
| 802 | TARBP2   | ENSG00000139546 | 12:53502184-53503026:+      | 0.00061232 | 0.142976837   | 0.104643223     |
| 803 | TARBP2   | ENSG00000139546 | 12:53504815-53505134:+      | 0.00023194 | 0.199717334   | 0.151801481     |
| 804 | TARBP2   | ENSG00000139546 | 12:53505262-53505648:+      | 0.03650228 | 0.11178544    | 0.09405593      |
| 805 | ATF7     | ENSG00000170653 | 12:53517354-53523275:-      | 0.00022629 | 0.066365111   | 0.097792821     |
| 806 | ATF7     | ENSG00000170653 | 12:53534659-53537414:-      | 0.03192907 | 0.10061832    | 0.122359501     |
| 807 | CALCOCO1 | ENSG0000012822  | 12:53712121-53713099:-      | 0.0023635  | 0.270913      | 0.326095218     |
| 808 | CALCOCO1 | ENSG0000012822  | 12:53713900-53714132:-      | 4.69E-05   | 0.64740322    | 0.562059935     |
| 809 | CALCOCO1 | ENSG0000012822  | 12:53716047-53716259:-      | 0.00280672 | 0.084533476   | 0.109114838     |
| 810 | HNRNPA1  | ENSG00000135486 | 12:54284317-54284548:+      | 2.43E-05   | 0.097639123   | 0.057203888     |
| 811 | RDH5     | ENSG00000135437 | 12:55724049-55724321:+      | 0.00231857 | 0.439017268   | 0.370328364     |
| 812 | ORMDL2   | ENSG00000123353 | 12:55819173-55819341:+      | 6.38E-10   | 0.212605983   | 0.111168618     |
| 813 | ORMDL2   | ENSG00000123353 | 12:55819493-55820259:+      | 1.64E-12   | 0.197034189   | 0.095065895     |
| 814 | RPL41    | ENSG00000229117 | 12:56116659-56116774:+      | 0.04691913 | 0.333875122   | 0.290739597     |
| 815 | MYL6     | ENSG00000092841 | 12:56158711-56158901:+      | 0.0030842  | 0.023641264   | 0.026394233     |
| 816 | MYL6     | ENSG00000092841 | 12:56158711-56159974:+      | 5.49E-08   | 0.023055445   | 0.025285638     |
| 817 | MYL6     | ENSG00000092841 | 12:56160320-56160625:+      | 3.45E-05   | 0.087897776   | 0.076463304     |
| 818 | SMARCC2  | ENSG00000139613 | 12:56181101-56181481:-      | 0.00055045 | 0.136138546   | 0.109353975     |
| 819 | NABP2    | ENSG00000139579 | 12:56224441-56224833:+      | 6.86E-06   | 0.570169085   | 0.469806078     |
| 820 | ANKRD52  | ENSG00000139645 | 12:56244133-56244352:-      | 0.04641304 | 0.209848605   | 0.17708449      |
| 821 | PAN2     | ENSG00000135473 | 12:56318434-56319087:-      | 0.02822322 | 0.103808939   | 0.096889138     |
| 822 | PAN2     | ENSG00000135473 | 12:56319181-56319307:-      | 2.00E-06   | 0.68589022    | 0.599081714     |
| 823 | PAN2     | ENSG00000135473 | 12:56322482-56322614:-      | 0.03283468 | 0.103438222   | 0.124133727     |
| 824 | STAT2    | ENSG00000170581 | 12:56346955-56348528:-      | 0.00090669 | 0.079912005   | 0.123013142     |
| 825 | STAT2    | ENSG00000170581 | 12:56348623-56348751:-      | 0.03977498 | 0.10399478    | 0.130819173     |
| 826 | STAT2    | ENSG00000170581 | 12:56349059-56349162:-      | 0.03742384 | 0.166778328   | 0.206057881     |
| 827 | BAZZA    | ENSG00000076108 | 12:56606733-56609735:-      | 0.03938487 | 0.087555444   | 0.118635095     |
| 828 | PRIM1    | ENSG00000198056 | 12:56731734-56734146:-      | 0.02620641 | 0.167779799   | 0.147939994     |
| 829 | LRP1     | ENSG00000123384 | 12:57162983-57165804:+      | 0.01884347 | 0.1050319     | 0.15884271      |
| 830 | LRP1     | ENSG00000123384 | 12:57203521-57204409:+      | 0.04366979 | 0.084808791   | 0.113278378     |
| 831 | LRP1     | ENSG00000123384 | 12:57205677-57206472:+      | 0.00825865 | 0.092178412   | 0.075863271     |
| 832 | SHMT2    | ENSG00000182199 | 12:57232575-57232703:+      | 0.00423287 | 0.095897145   | 0.073406834     |
| 833 | SHMT2    | ENSG00000182199 | 12:57232843-57233179:+      | 0.00014672 | 0.269385244   | 0.215409294     |
| 834 | SHMT2    | ENSG00000182199 | 12:57233345-57233562:+      | 0.01952099 | 0.092182754   | 0.074004106     |
| 835 | R3HDM2   | ENSG00000179912 | 12:57268457-57268921:-      | 0.00645852 | 0.156756916   | 0.128632879     |
| 836 | MARS     | ENSG00000166986 | 12:57512353-57512750:+      | 2.72E-05   | 0.37946161    | 0.292420312     |
| 837 | MARS     | ENSG00000166986 | 12:57515336-57515919:+      | 7.65E-06   | 0.09336345    | 0.064655683     |
| 838 | MBD6     | ENSG00000166987 | 12:57524092-57524279:+      | 1.00E-05   | 0.317081229   | 0.224112283     |
| 839 | MBD6     | ENSG00000166987 | 12:57526388-57526565:+      | 0.00424853 | 0.155335338   | 0.110545368     |
| 840 | MBD6     | ENSG00000166987 | 12:57527227-57527506:+      | 0.00605149 | 0.377365659   | 0.307542026     |
| 841 | MBD6     | ENSG00000166987 | 12:57527660-57527847:+      | 0.00232524 | 0.28928401    | 0.223860883     |
| 842 | KIF5A    | ENSG00000155980 | 12:57581568-57581869:+      | 0.00030857 | 0.097025761   | 0.071597876     |
| 843 | KIF5A    | ENSG00000155980 | 12:57582629-57583100:+      | 0.01599944 | 0.160389128   | 0.138351267     |
| 844 | DTX3     | ENSG00000178498 | 12:57608737-57609076:+      | 3.19E-11   | 0.290335367   | 0.16856077      |
| 845 | ARHGEF25 | ENSG00000240771 | 12:57614119-57614330:+      | 0.01020347 | 0.087591578   | 0.071293344     |
| 846 | ARHGEF25 | ENSG00000240771 | 12:57614400-57614515:+      | 5.21E-06   | 0.158592211   | 0.120856778     |
| 847 | ARHGEF25 | ENSG00000240771 | 12:57614605-57614688:+      | 1.12E-06   | 0.173519438   | 0.130918235     |
| 848 | SLC26A10 | ENSG00000135502 | 12:57624982-57625122:+      | 1.65E-08   | 0.773565805   | 0.669616299     |
| 849 | OS9      | ENSG00000135506 | 12:57696038-57696274:+      | 0.0062532  | 0.123074687   | 0.114994223     |
| 850 | OS9      | ENSG00000135506 | 12:57719182-57720405:+      | 0.0146415  | 0.063315712   | 0.059486126     |
| 851 | OS9      | ENSG00000135506 | 12:57720263-57720405:+      | 0.00157541 | 0.059855518   | 0.073287639     |
| 852 | AGAP2    | ENSG00000135439 | 12:57734679-57735368:-      | 0.00468412 | 0.216136755   | 0.167173105     |
| 853 | AGAP2    | ENSG00000135439 | 12:57735427-57737078:-      | 0.00751703 | 0.160210707   | 0.206050882     |
| 854 | TSPAN31  | ENSG00000135452 | 12:57745217-57745744:+      | 7.52E-05   | 0.125189302   | 0.090625793     |



| S/N | Gene        | Ensembl ID      | Position of retained intron | p-value    | AD_IR_average | Cont_IR_average |
|-----|-------------|-----------------|-----------------------------|------------|---------------|-----------------|
| 855 | TSPAN31     | ENSG00000135452 | 12:57745912-57746175:+      | 3.79E-05   | 0.117347732   | 0.077851113     |
| 856 | TSPAN31     | ENSG00000135452 | 12:57746720-57747017:+      | 1.61E-08   | 0.176706227   | 0.115347205     |
| 857 | CDK4        | ENSG00000135446 | 12:57748617-57749181:-      | 0.00241295 | 0.177196699   | 0.152203496     |
| 858 | CDK4        | ENSG00000135446 | 12:57749317-57749453:-      | 0.01256133 | 0.21494042    | 0.185803127     |
| 859 | March9 gene | ENSG00000139266 | 12:57755885-57756928:+      | 0.00072632 | 0.254766866   | 0.191476361     |
| 860 | AVIL        | ENSG00000135407 | 12:57797995-57799794:-      | 0.04238526 | 0.237059415   | 0.195916005     |
| 861 | TBK1        | ENSG00000183735 | 12:64498039-64501329:+      | 0.00470976 | 0.107323224   | 0.081258396     |
| 862 | MDM1        | ENSG00000111554 | 12:68295366-68296922:-      | 2.82E-05   | 0.114026182   | 0.075562377     |
| 863 | MDM1        | ENSG00000111554 | 12:68296982-68302619:-      | 1.04E-08   | 0.082856644   | 0.038967754     |
| 864 | CPSF6       | ENSG00000111605 | 12:69259543-69260043:+      | 0.00922007 | 0.123082421   | 0.094824449     |
| 865 | METTL25     | ENSG00000127720 | 12:82476718-82477280:+      | 2.77E-09   | 0.39747121    | 0.272938346     |
| 866 | METTL25     | ENSG00000127720 | 12:82477352-82478931:+      | 0.00323446 | 0.309777416   | 0.252619704     |
| 867 | NR2C1       | ENSG00000120798 | 12:95025255-95028386:-      | 0.02696276 | 0.292917082   | 0.251346497     |
| 868 | NR2C1       | ENSG00000120798 | 12:95057643-95057730:-      | 0.00091783 | 0.128670868   | 0.092886503     |
| 869 | LTA4H       | ENSG00000111144 | 12:96003064-96003837:-      | 7.49E-06   | 0.206788061   | 0.153624131     |
| 870 | LTA4H       | ENSG00000111144 | 12:96003064-96006313:-      | 8.75E-06   | 0.061173118   | 0.04225346      |
| 871 | SLC25A3     | ENSG00000075415 | 12:98593740-98593974:+      | 0.00281336 | 0.350287506   | 0.261406208     |
| 872 | UTP20       | ENSG00000120800 | 12:101383669-101385582:+    | 0.00016956 | 0.499467171   | 0.418628416     |
| 873 | UTP20       | ENSG00000120800 | 12:101385728-101385967:+    | 1.49E-07   | 0.42907128    | 0.310674214     |
| 874 | CRY1        | ENSG00000008405 | 12:106992890-106992964:-    | 0.00521226 | 0.20751612    | 0.156262355     |
| 875 | ACACB       | ENSG00000076555 | 12:109259108-109260479:+    | 0.01565129 | 0.081727991   | 0.107568042     |
| 876 | PPP1CC      | ENSG00000186298 | 12:110722269-110722471:-    | 0.00119408 | 0.082442583   | 0.118763795     |
| 877 | ATXN2       | ENSG00000204842 | 12:111453845-111456028:-    | 0.00989741 | 0.321637805   | 0.282116416     |
| 878 | MAPKAPK5    | ENSG00000089022 | 12:111889000-111890039:+    | 0.01041081 | 0.081848981   | 0.067651851     |
| 879 | TMEM116     | ENSG00000198270 | 12:111936830-111937159:-    | 0.00013083 | 0.104951972   | 0.061570415     |
| 880 | TRAFD1      | ENSG00000135148 | 12:112152140-112152426:+    | 0.03568369 | 0.163653793   | 0.19051184      |
| 881 | HECTD4      | ENSG00000173064 | 12:112226758-112228088:-    | 0.00157392 | 0.078718818   | 0.146020292     |
| 882 | TPCN1       | ENSG00000186815 | 12:113280195-113284580:+    | 0.00167664 | 0.068353889   | 0.090905045     |
| 883 | TPCN1       | ENSG00000186815 | 12:113288234-113288757:+    | 3.41E-10   | 0.753888768   | 0.626315545     |
| 884 | SLC8B1      | ENSG00000089060 | 12:113299974-113304320:-    | 0.00033377 | 0.15851736    | 0.122973669     |
| 885 | SLC8B1      | ENSG00000089060 | 12:113321108-113321195:-    | 1.52E-05   | 0.13005634    | 0.068645815     |
| 886 | TAOK3       | ENSG00000135090 | 12:118152409-118160145:-    | 0.00042607 | 0.098877795   | 0.072780939     |
| 887 | SIRT4       | ENSG00000089163 | 12:120312750-120312883:+    | 0.00052562 | 0.090343189   | 0.123371918     |
| 888 | DYNLL1      | ENSG00000088986 | 12:120496216-120496401:+    | 0.03368533 | 0.028924858   | 0.020560072     |
| 889 | RNF10       | ENSG00000022840 | 12:120563070-120563331:+    | 0.00709061 | 0.018450866   | 0.027593975     |
| 890 | POP5        | ENSG00000167272 | 12:120579412-120579513:-    | 0.01150773 | 0.141800902   | 0.108057778     |
| 891 | CABP1       | ENSG00000157782 | 12:120659908-120660195:+    | 0.0296104  | 0.267987171   | 0.312849479     |
| 892 | ACADS       | ENSG00000122971 | 12:120738670-120738819:+    | 0.0004627  | 0.118341301   | 0.07385007      |
| 893 | ACADS       | ENSG00000122971 | 12:120738915-120739139:+    | 0.00081273 | 0.141475594   | 0.083467359     |
| 894 | P2RX4       | ENSG00000135124 | 12:121232676-121232996:+    | 0.00248175 | 0.212418057   | 0.171911199     |
| 895 | ANAPC5      | ENSG00000089053 | 12:121318424-121318500:-    | 0.00016716 | 0.13426059    | 0.092175957     |
| 896 | TMEM120     | ENSG00000188735 | 12:121752223-121761648:+    | 0.00653001 | 0.169934943   | 0.140312222     |
| 897 | PSMD9       | ENSG00000110801 | 12:121899845-121903005:+    | 0.01971399 | 0.083052868   | 0.071165757     |
| 898 | MLXIP       | ENSG00000175727 | 12:122137590-122138193:+    | 0.0031566  | 0.333256451   | 0.268591234     |
| 899 | HIP1R       | ENSG00000130787 | 12:122851297-122854042:+    | 0.00070512 | 0.112212404   | 0.148512419     |
| 900 | HIP1R       | ENSG00000130787 | 12:122860077-122860147:+    | 0.02607762 | 0.182110478   | 0.210730636     |
| 901 | ABCB9       | ENSG00000150967 | 12:122935431-122940110:-    | 6.23E-05   | 0.184841473   | 0.12802693      |
| 902 | ARL6IP4     | ENSG00000182196 | 12:122980812-122981128:+    | 0.0002135  | 0.200863238   | 0.146667496     |
| 903 | C12orf65    | ENSG00000130921 | 12:123253956-123256812:+    | 0.01484134 | 0.094572648   | 0.079873468     |
| 904 | EIF2B1      | ENSG00000111361 | 12:123621920-123622635:-    | 0.01174487 | 0.123570138   | 0.141909149     |
| 905 | NCOR2       | ENSG00000196498 | 12:124334617-124335134:-    | 0.01184464 | 0.167117584   | 0.129221945     |
| 906 | NCOR2       | ENSG00000196498 | 12:124335632-124336752:-    | 0.00022163 | 0.234875476   | 0.197888923     |
| 907 | NCOR2       | ENSG00000196498 | 12:124355571-124356641:-    | 1.72E-05   | 0.163595288   | 0.239362699     |
| 908 | NCOR2       | ENSG00000196498 | 12:124362297-124363678:-    | 0.04034812 | 0.040034624   | 0.045846736     |
| 909 | SFSWAP      | ENSG00000061936 | 12:131711447-131714070:+    | 0.00355042 | 0.253748057   | 0.304826896     |
| 910 | SFSWAP      | ENSG00000061936 | 12:131714240-131714821:+    | 1.33E-05   | 0.188535123   | 0.23407357      |
| 911 | SFSWAP      | ENSG00000061936 | 12:131753363-131754367:+    | 0.01563647 | 0.312336424   | 0.266629384     |



| S/N | Gene    | Ensembl ID      | Position of retained intron | p-value    | AD_IR_average | Cont_IR_average |
|-----|---------|-----------------|-----------------------------|------------|---------------|-----------------|
| 912 | ULK1    | ENSG00000177169 | 12:131908817-131908897:+    | 0.01367532 | 0.111891013   | 0.079741097     |
| 913 | ULK1    | ENSG00000177169 | 12:131909237-131909774:+    | 0.04104792 | 0.078492694   | 0.089969666     |
| 914 | ULK1    | ENSG00000177169 | 12:131915421-131915890:+    | 0.0019152  | 0.462083768   | 0.384358701     |
| 915 | PUS1    | ENSG00000177192 | 12:131939275-131941291:+    | 0.01037042 | 0.165174067   | 0.14314357      |
| 916 | EP400   | ENSG00000183495 | 12:132067486-132069494:+    | 0.00541712 | 0.110352082   | 0.146016103     |
| 917 | DDX51   | ENSG00000185163 | 12:132142422-132142727:-    | 0.00013874 | 0.238309905   | 0.170164126     |
| 918 | DDX51   | ENSG00000185163 | 12:132142878-132143694:-    | 0.00098005 | 0.410912182   | 0.331678664     |
| 919 | FBRSL1  | ENSG00000112787 | 12:132574348-132574492:+    | 0.00123259 | 0.121111213   | 0.078434886     |
| 920 | POLE    | ENSG00000177084 | 12:132625770-132626116:-    | 6.53E-05   | 0.110799449   | 0.069553422     |
| 921 | CHFR    | ENSG00000072609 | 12:132847130-132848084:-    | 0.02369809 | 0.107614602   | 0.127883861     |
| 922 | MPHOSPH | ENSG00000196199 | 13:19647291-19648421:+      | 6.84E-05   | 0.07372964    | 0.111647358     |
| 923 | MPHOSPH | ENSG00000196199 | 13:19666579-19668376:+      | 0.02601787 | 0.350693829   | 0.403283805     |
| 924 | MPHOSPH | ENSG00000196199 | 13:19670363-19670839:+      | 0.03962216 | 0.454031122   | 0.424293727     |
| 925 | MPHOSPH | ENSG00000196199 | 13:19671289-19671833:+      | 0.00061334 | 0.249697882   | 0.196284044     |
| 926 | PSPC1   | ENSG00000121390 | 13:19705831-19709541:-      | 0.02824889 | 0.121731087   | 0.08827294      |
| 927 | MICU2   | ENSG00000165487 | 13:21495318-21496051:-      | 1.33E-09   | 0.235781273   | 0.160408321     |
| 928 | CENPJ   | ENSG00000151849 | 13:24884083-24884160:-      | 0.02372333 | 0.21455839    | 0.154502831     |
| 929 | CENPJ   | ENSG00000151849 | 13:24884463-24885275:-      | 0.00153686 | 0.363730293   | 0.300616108     |
| 930 | CDK8    | ENSG00000132964 | 13:26400550-26401268:+      | 0.00865002 | 0.094631624   | 0.066564197     |
| 931 | CDK8    | ENSG00000132964 | 13:26401347-26401465:+      | 0.01542246 | 0.071314973   | 0.054323916     |
| 932 | HSPH1   | ENSG00000120694 | 13:31137524-31138406:-      | 1.24E-07   | 0.053663794   | 0.041260792     |
| 933 | HSPH1   | ENSG00000120694 | 13:31141259-31143791:-      | 1.66E-08   | 0.034016302   | 0.022377593     |
| 934 | HSPH1   | ENSG00000120694 | 13:31143923-31145562:-      | 1.01E-06   | 0.042415037   | 0.039345152     |
| 935 | N4BP2L2 | ENSG00000244754 | 13:32521449-32522181:-      | 0.0413783  | 0.229691248   | 0.199802984     |
| 936 | EXOSC8  | ENSG00000120699 | 13:37002309-37002487:+      | 0.00925191 | 0.097246252   | 0.069630236     |
| 937 | SUPT20H | ENSG00000102710 | 13:37009809-37010551:-      | 5.82E-06   | 0.152565009   | 0.121790143     |
| 938 | SUPT20H | ENSG00000102710 | 13:37010655-37012191:-      | 2.07E-08   | 0.104403105   | 0.073244685     |
| 939 | UFM1    | ENSG00000120686 | 13:38358132-38359300:+      | 0.01470416 | 0.124349496   | 0.084022015     |
| 940 | MRPS31  | ENSG00000102738 | 13:40749281-40754018:-      | 1.17E-05   | 0.237227082   | 0.164630514     |
| 941 | MRPS31  | ENSG00000102738 | 13:40754092-40756872:-      | 5.34E-07   | 0.215585505   | 0.131384148     |
| 942 | WBP4    | ENSG00000120688 | 13:41062716-41065015:+      | 0.00736061 | 0.146544793   | 0.116407794     |
| 943 | NAA16   | ENSG00000172766 | 13:41374839-41375404:+      | 0.01594922 | 0.160043541   | 0.126590475     |
| 944 | SETDB2  | ENSG00000136169 | 13:49483563-49485629:+      | 0.0116929  | 0.109328404   | 0.085009647     |
| 945 | PHF11   | ENSG00000136147 | 13:49522107-49523174:+      | 0.01863168 | 0.094206021   | 0.069039771     |
| 946 | TGDS    | ENSG00000088451 | 13:94574852-94576313:-      | 0.0191247  | 0.104463907   | 0.082079165     |
| 947 | DZIP1   | ENSG00000134874 | 13:95594086-95599364:-      | 0.04273206 | 0.096140549   | 0.0813058       |
| 948 | CLYBL   | ENSG00000125246 | 13:99864911-99866239:+      | 0.0435442  | 0.168515751   | 0.129137419     |
| 949 | NAXD    | ENSG00000213995 | 13:110634595-110634671:+    | 0.02117332 | 0.470722329   | 0.416717597     |
| 950 | NAXD    | ENSG00000213995 | 13:110634776-110635467:+    | 1.43E-05   | 0.43960672    | 0.351182506     |
| 951 | NAXD    | ENSG00000213995 | 13:110635588-110637128:+    | 0.00506118 | 0.203378696   | 0.165108616     |
| 952 | CARS2   | ENSG00000134905 | 13:110642521-110644384:-    | 0.0285113  | 0.11183299    | 0.120247953     |
| 953 | CARS2   | ENSG00000134905 | 13:110651100-110663450:-    | 0.00834765 | 0.105591938   | 0.082222732     |
| 954 | MCF2L   | ENSG00000126217 | 13:113096653-113096773:+    | 0.01213349 | 0.121468654   | 0.145393338     |
| 955 | PCID2   | ENSG00000126226 | 13:113177976-113178173:-    | 0.04489842 | 0.627784451   | 0.642609688     |
| 956 | PCID2   | ENSG00000126226 | 13:113181230-113184345:-    | 0.00031762 | 0.171767884   | 0.130420958     |
| 957 | PCID2   | ENSG00000126226 | 13:113184487-113185484:-    | 0.0160925  | 0.118336589   | 0.09092167      |
| 958 | LAMP1   | ENSG00000185896 | 13:113321727-113322281:+    | 0.0200773  | 0.136362128   | 0.126690401     |
| 959 | TMCO3   | ENSG00000150403 | 13:113534240-113539356:+    | 0.00279049 | 0.17495842    | 0.136662401     |
| 960 | GAS6    | ENSG00000183087 | 13:113821018-113821957:-    | 0.00140035 | 0.204935027   | 0.152313147     |
| 961 | GAS6    | ENSG00000183087 | 13:113835635-113838068:-    | 0.00179707 | 0.071650391   | 0.095051173     |
| 962 | GAS6    | ENSG00000183087 | 13:113846589-113848025:-    | 0.02487771 | 0.365118634   | 0.323309701     |
| 963 | CDC16   | ENSG00000130177 | 13:114243348-114243855:+    | 5.03E-05   | 0.369550854   | 0.239264264     |
| 964 | CDC16   | ENSG00000130177 | 13:114243989-114244889:+    | 0.00210743 | 0.392973439   | 0.314221355     |
| 965 | CDC16   | ENSG00000130177 | 13:114259398-114261886:+    | 0.00243089 | 0.130401527   | 0.115279778     |
| 966 | UPF3A   | ENSG00000169062 | 13:114286400-114286518:+    | 0.00576262 | 0.186018989   | 0.1705279       |
| 967 | UPF3A   | ENSG00000169062 | 13:114291792-114298839:+    | 0.03448323 | 0.204285812   | 0.177688987     |
| 968 | UPF3A   | ENSG00000169062 | 13:114291792-114301730:+    | 0.00068035 | 0.099583356   | 0.079465343     |

| S/N  | Gene      | Ensembl ID      | Position of retained intron | p-value    | AD_IR_average | Cont_IR_average |
|------|-----------|-----------------|-----------------------------|------------|---------------|-----------------|
| 969  | PARP2     | ENSG00000129484 | 14:20357149-20357395:+      | 0.00085336 | 0.15672572    | 0.218351568     |
| 970  | PARP2     | ENSG00000129484 | 14:20357520-20357637:+      | 1.55E-05   | 0.366905293   | 0.478274273     |
| 971  | OSGEP     | ENSG00000092094 | 14:20448811-20448963:-      | 0.04428062 | 0.164142927   | 0.145619455     |
| 972  | TMEM55B   | ENSG00000165782 | 14:20458702-20459205:-      | 0.02022734 | 0.107631327   | 0.093378004     |
| 973  | TMEM55B   | ENSG00000165782 | 14:20459440-20459627:-      | 7.26E-05   | 0.128269665   | 0.097723296     |
| 974  | TMEM55B   | ENSG00000165782 | 14:20459733-20460191:-      | 6.07E-07   | 0.386688846   | 0.294086234     |
| 975  | TMEM55B   | ENSG00000165782 | 14:20460298-20460654:-      | 0.00076423 | 0.433868122   | 0.375956364     |
| 976  | METTL17   | ENSG00000165792 | 14:20990383-20990463:+      | 0.04491252 | 0.250165627   | 0.214797223     |
| 977  | METTL17   | ENSG00000165792 | 14:20992205-20992540:+      | 7.10E-06   | 0.109796009   | 0.06929261      |
| 978  | METTL17   | ENSG00000165792 | 14:20992622-20993117:+      | 1.29E-05   | 0.173052357   | 0.12098979      |
| 979  | METTL17   | ENSG00000165792 | 14:20993191-20993968:+      | 0.01477367 | 0.251208173   | 0.209262527     |
| 980  | METTL17   | ENSG00000165792 | 14:20994901-20995164:+      | 0.00093862 | 0.303234313   | 0.357824442     |
| 981  | METTL17   | ENSG00000165792 | 14:20995951-20996208:+      | 0.00077808 | 0.501741646   | 0.43315187      |
| 982  | METTL17   | ENSG00000165792 | 14:20996292-20996526:+      | 0.00074465 | 0.152284093   | 0.117730142     |
| 983  | NDRG2     | ENSG00000165795 | 14:21018239-21018762:-      | 0.00074082 | 0.016538718   | 0.01268688      |
| 984  | ARHGEF40  | ENSG00000165801 | 14:21076643-21076773:+      | 0.00015686 | 0.069721891   | 0.104910752     |
| 985  | ARHGEF40  | ENSG00000165801 | 14:21076890-21078176:+      | 0.01683462 | 0.098582123   | 0.118320839     |
| 986  | ARHGEF40  | ENSG00000165801 | 14:21085866-21087000:+      | 0.00092452 | 0.302745134   | 0.246317173     |
| 987  | ARHGEF40  | ENSG00000165801 | 14:21088098-21088829:+      | 9.87E-11   | 0.260515548   | 0.177264671     |
| 988  | METTL3    | ENSG00000165819 | 14:21499802-21500494:-      | 0.0036084  | 0.186102491   | 0.152586479     |
| 989  | METTL3    | ENSG00000165819 | 14:21500682-21500912:-      | 0.0170138  | 0.218790629   | 0.178371027     |
| 990  | MRPL52    | ENSG00000172590 | 14:22829940-22830049:+      | 1.31E-07   | 0.325208296   | 0.232215616     |
| 991  | MRPL52    | ENSG00000172590 | 14:22830254-22833417:+      | 7.30E-05   | 0.090559321   | 0.073940653     |
| 992  | CDH24     | ENSG00000139880 | 14:23048479-23049026:-      | 5.88E-10   | 0.226014302   | 0.139560732     |
| 993  | CDH24     | ENSG00000139880 | 14:23049275-23049626:-      | 0.00096908 | 0.155270345   | 0.109062068     |
| 994  | CDH24     | ENSG00000139880 | 14:23049738-23049821:-      | 0.01712233 | 0.136583113   | 0.104939858     |
| 995  | BCL2L2-PA | ENSG00000258643 | 14:23324289-23325246:+      | 0.00118411 | 0.427414305   | 0.389258714     |
| 996  | SLC22A17  | ENSG00000092096 | 14:23347212-23347459:-      | 3.95E-05   | 0.056118526   | 0.041496625     |
| 997  | SLC22A17  | ENSG00000092096 | 14:23347731-23347890:-      | 0.00862134 | 0.198908206   | 0.176778429     |
| 998  | SLC22A17  | ENSG00000092096 | 14:23347996-23348160:-      | 0.00225798 | 0.202061165   | 0.170439757     |
| 999  | EFS       | ENSG00000100842 | 14:23357660-23358875:-      | 0.00242381 | 0.105166876   | 0.077759268     |
| 1000 | AP1G2     | ENSG00000213983 | 14:23562066-23562287:-      | 0.01655016 | 0.102716987   | 0.087147319     |
| 1001 | AP1G2     | ENSG00000213983 | 14:23562593-23563199:-      | 0.00078853 | 0.102275478   | 0.09808877      |
| 1002 | AP1G2     | ENSG00000213983 | 14:23563502-23563583:-      | 0.00066058 | 0.236893378   | 0.179150401     |
| 1003 | AP1G2     | ENSG00000213983 | 14:23564159-23564332:-      | 0.0102331  | 0.07860535    | 0.070816636     |
| 1004 | AP1G2     | ENSG00000213983 | 14:23564660-23565118:-      | 6.50E-05   | 0.153701779   | 0.100162957     |
| 1005 | AP1G2     | ENSG00000213983 | 14:23565701-23566063:-      | 0.0019118  | 0.215551561   | 0.173997351     |
| 1006 | AP1G2     | ENSG00000213983 | 14:23566419-23566561:-      | 1.70E-07   | 0.228031201   | 0.177706609     |
| 1007 | AP1G2     | ENSG00000213983 | 14:23566686-23567110:-      | 4.01E-07   | 0.20980855    | 0.164642619     |
| 1008 | CARMIL3   | ENSG00000186648 | 14:24060756-24060926:+      | 0.03719491 | 0.207403578   | 0.172646523     |
| 1009 | CARMIL3   | ENSG00000186648 | 14:24065273-24065621:+      | 0.00478078 | 0.069030963   | 0.085108358     |
| 1010 | CARMIL3   | ENSG00000186648 | 14:24069247-24069378:+      | 0.04341747 | 0.079891698   | 0.09229896      |
| 1011 | CPNE6     | ENSG00000100884 | 14:24075276-24075504:+      | 0.00029239 | 0.2290559     | 0.14844906      |
| 1012 | CPNE6     | ENSG00000100884 | 14:24075591-24075826:+      | 0.00046994 | 0.172684811   | 0.113575247     |
| 1013 | CPNE6     | ENSG00000100884 | 14:24076282-24076359:+      | 2.12E-05   | 0.297100371   | 0.180696283     |
| 1014 | CPNE6     | ENSG00000100884 | 14:24076414-24076505:+      | 1.60E-05   | 0.269075973   | 0.15987434      |
| 1015 | CPNE6     | ENSG00000100884 | 14:24076557-24076878:+      | 0.00029028 | 0.357439554   | 0.247239221     |
| 1016 | DCAF11    | ENSG00000100897 | 14:24123077-24123174:+      | 0.00390441 | 0.26737828    | 0.227224495     |
| 1017 | PSME1     | ENSG00000092010 | 14:24138560-24138735:+      | 4.59E-05   | 0.123658751   | 0.08991169      |
| 1018 | PSME2     | ENSG00000100911 | 14:24144468-24145057:-      | 4.53E-10   | 0.155868367   | 0.091413965     |
| 1019 | PSME2     | ENSG00000100911 | 14:24146240-24146533:-      | 6.88E-08   | 0.110578506   | 0.068632999     |
| 1020 | RNF31     | ENSG00000092098 | 14:24150448-24150597:+      | 0.0129576  | 0.131031915   | 0.171084804     |
| 1021 | RNF31     | ENSG00000092098 | 14:24150888-24151130:+      | 0.00026288 | 0.140146446   | 0.199006464     |
| 1022 | RNF31     | ENSG00000092098 | 14:24157638-24157897:+      | 0.0013487  | 0.199884773   | 0.156955549     |
| 1023 | RNF31     | ENSG00000092098 | 14:24158011-24158141:+      | 4.80E-05   | 0.308982841   | 0.243128766     |
| 1024 | REC8      | ENSG00000100918 | 14:24179726-24179799:+      | 0.00093715 | 0.10217608    | 0.077238445     |
| 1025 | CHMP4A    | ENSG00000254505 | 14:24210768-24211410:-      | 0.03237013 | 0.038948414   | 0.035823998     |

| S/N  | Gene      | Ensembl ID      | Position of retained intron | p-value    | AD_IR_average | Cont_IR_average |
|------|-----------|-----------------|-----------------------------|------------|---------------|-----------------|
| 1026 | MDP1      | ENSG00000213920 | 14:24214395-24214491:-      | 0.03855494 | 0.130597573   | 0.112690784     |
| 1027 | MDP1      | ENSG00000213920 | 14:24215662-24215736:-      | 8.14E-06   | 0.55301122    | 0.444962        |
| 1028 | GMPR2     | ENSG00000100938 | 14:24238405-24238588:+      | 0.00698188 | 0.137105315   | 0.169288816     |
| 1029 | TINF2     | ENSG00000092330 | 14:24241994-24242140:-      | 0.01149255 | 0.087824709   | 0.12415239      |
| 1030 | TGM1      | ENSG00000092295 | 14:24249541-24254151:-      | 0.00580268 | 0.126111216   | 0.105590339     |
| 1031 | RABGGTA   | ENSG00000100949 | 14:24266517-24266775:-      | 0.02594248 | 0.258533098   | 0.224488556     |
| 1032 | RABGGTA   | ENSG00000100949 | 14:24267958-24268109:-      | 0.04824423 | 0.117798172   | 0.095063191     |
| 1033 | RABGGTA   | ENSG00000100949 | 14:24268198-24268368:-      | 0.00046259 | 0.406811085   | 0.366014727     |
| 1034 | RABGGTA   | ENSG00000100949 | 14:24268619-24268724:-      | 0.01273224 | 0.076286576   | 0.106979009     |
| 1035 | RABGGTA   | ENSG00000100949 | 14:24268826-24268910:-      | 0.01023279 | 0.163565026   | 0.136822119     |
| 1036 | DHRS1     | ENSG00000157379 | 14:24291219-24291555:-      | 0.01111113 | 0.460835939   | 0.453755247     |
| 1037 | DHRS1     | ENSG00000157379 | 14:24291625-24292183:-      | 5.33E-05   | 0.346953354   | 0.29373441      |
| 1038 | KHNYN     | ENSG00000100441 | 14:24432610-24432721:+      | 0.02057362 | 0.090634277   | 0.109897703     |
| 1039 | SDR39U1   | ENSG00000100445 | 14:24442260-24442345:-      | 0.00094105 | 0.178376139   | 0.161050465     |
| 1040 | PPP2R3C   | ENSG00000092020 | 14:35096633-35096708:-      | 0.00082672 | 0.275776694   | 0.245729662     |
| 1041 | PPP2R3C   | ENSG00000092020 | 14:35096764-35099251:-      | 0.00307769 | 0.122103923   | 0.114755779     |
| 1042 | MBIP      | ENSG00000151332 | 14:36311725-36311958:-      | 0.01738166 | 0.102707171   | 0.088049561     |
| 1043 | PRPF39    | ENSG00000185246 | 14:45114614-45114856:+      | 0.00344918 | 0.112754613   | 0.088491781     |
| 1044 | FKBP3     | ENSG00000100442 | 14:45130800-45134348:-      | 0.00266049 | 0.388232878   | 0.322556065     |
| 1045 | KLHDC2    | ENSG00000165516 | 14:49779675-49779747:+      | 0.00449786 | 0.457600183   | 0.419771662     |
| 1046 | KLHDC2    | ENSG00000165516 | 14:49779806-49780212:+      | 0.00075599 | 0.076483306   | 0.10772161      |
| 1047 | KLHDC2    | ENSG00000165516 | 14:49782457-49782541:+      | 0.01066334 | 0.090699476   | 0.104340492     |
| 1048 | KLHDC2    | ENSG00000165516 | 14:49782594-49782829:+      | 0.00825886 | 0.09019391    | 0.102599979     |
| 1049 | PSMA3     | ENSG00000100567 | 14:58270485-58270933:+      | 0.00820939 | 0.134790128   | 0.107726029     |
| 1050 | PSMA3     | ENSG00000100567 | 14:58270998-58271850:+      | 0.00045035 | 0.129915648   | 0.099815166     |
| 1051 | ARID4A    | ENSG00000032219 | 14:58347117-58347646:+      | 0.00025106 | 0.088495212   | 0.165484424     |
| 1052 | ARID4A    | ENSG00000032219 | 14:58367029-58371885:+      | 0.00262017 | 0.113284955   | 0.078029438     |
| 1053 | MTHFD1    | ENSG00000100714 | 14:64442402-64444692:+      | 0.00027355 | 0.385801695   | 0.296478935     |
| 1054 | MTHFD1    | ENSG00000100714 | 14:64444734-64448216:+      | 0.00441986 | 0.380607146   | 0.321509468     |
| 1055 | PLEKHG3   | ENSG00000126822 | 14:64742455-64742981:+      | 0.00051846 | 0.331102885   | 0.264206096     |
| 1056 | CHURC1-F  | ENSG00000125954 | 14:65053349-65054574:+      | 0.00099997 | 0.204175271   | 0.160056162     |
| 1057 | CHURC1-F  | ENSG00000125954 | 14:65054689-65061180:+      | 2.05E-06   | 0.207864013   | 0.144662168     |
| 1058 | PLEKHH1   | ENSG00000054690 | 14:67579311-67579720:+      | 0.01403811 | 0.389424634   | 0.338442195     |
| 1059 | COQ6      | ENSG00000119723 | 14:73959078-73959161:+      | 0.00362414 | 0.24661457    | 0.192246558     |
| 1060 | ABCD4     | ENSG00000119688 | 14:74287886-74288206:-      | 0.00817519 | 0.298208439   | 0.254344138     |
| 1061 | ABCD4     | ENSG00000119688 | 14:74290499-74292286:-      | 5.37E-10   | 0.59937761    | 0.463063701     |
| 1062 | ABCD4     | ENSG00000119688 | 14:74295198-74295853:-      | 7.77E-05   | 0.22347527    | 0.160228853     |
| 1063 | ABCD4     | ENSG00000119688 | 14:74295979-74296332:-      | 0.00028099 | 0.264405741   | 0.193981495     |
| 1064 | ABCD4     | ENSG00000119688 | 14:74296449-74297929:-      | 2.56E-05   | 0.471818244   | 0.407585195     |
| 1065 | ABCD4     | ENSG00000119688 | 14:74298069-74299547:-      | 0.02206678 | 0.33167922    | 0.325272753     |
| 1066 | DLST      | ENSG00000119689 | 14:74889349-74889896:+      | 0.02523923 | 0.0989069     | 0.104188801     |
| 1067 | DLST      | ENSG00000119689 | 14:74889952-74891055:+      | 0.00570325 | 0.084054026   | 0.074856718     |
| 1068 | DLST      | ENSG00000119689 | 14:74891167-74892833:+      | 0.01097355 | 0.313682      | 0.27544074      |
| 1069 | VASH1     | ENSG00000071246 | 14:76763130-76769962:+      | 0.04311101 | 0.1672365     | 0.137534517     |
| 1070 | TMEM63C   | ENSG00000165548 | 14:77251898-77253304:+      | 0.000206   | 0.092093935   | 0.062749131     |
| 1071 | POMT2     | ENSG0000009830  | 14:77283873-77284949:-      | 4.00E-06   | 0.318584793   | 0.238806897     |
| 1072 | PSMC1     | ENSG00000100764 | 14:90270352-90272272:+      | 0.00025952 | 0.185663267   | 0.142235275     |
| 1073 | C14orf159 | ENSG00000133943 | 14:91215556-91224683:+      | 2.21E-09   | 0.170137959   | 0.109718178     |
| 1074 | C14orf159 | ENSG00000133943 | 14:91223795-91224683:+      | 0.00014974 | 0.210608643   | 0.161847792     |
| 1075 | PPP4R3A   | ENSG00000100796 | 14:91465419-91466260:-      | 0.00028081 | 0.022599237   | 0.018688965     |
| 1076 | LGMN      | ENSG00000100600 | 14:92704361-92704639:-      | 0.01374184 | 0.187756176   | 0.166649121     |
| 1077 | LGMN      | ENSG00000100600 | 14:92706653-92709671:-      | 0.00010319 | 0.085274933   | 0.056199927     |
| 1078 | UNC79     | ENSG00000133958 | 14:93691946-93694334:+      | 0.00017917 | 0.09727479    | 0.067325039     |
| 1079 | UNC79     | ENSG00000133958 | 14:93704666-93706703:+      | 0.00017986 | 0.117102567   | 0.0849498       |
| 1080 | PAPOLA    | ENSG00000090060 | 14:96532649-96534490:+      | 0.00061419 | 0.28084422    | 0.383749974     |
| 1081 | EVL       | ENSG00000196405 | 14:100137644-100137739:+    | 3.48E-09   | 0.198040148   | 0.151393496     |
| 1082 | BEGAIN    | ENSG00000183092 | 14:100540579-100543857:-    | 0.01701279 | 0.298351616   | 0.257848574     |

| S/N  | Gene      | Ensembl ID      | Position of retained intron | p-value    | AD_IR_average | Cont_IR_average |
|------|-----------|-----------------|-----------------------------|------------|---------------|-----------------|
| 1083 | MOK       | ENSG00000080823 | 14:102231821-102232534:-    | 0.03501439 | 0.073997627   | 0.068380173     |
| 1084 | CDC42BPB  | ENSG00000198752 | 14:102940324-102943890:-    | 0.02328924 | 0.189702224   | 0.170805256     |
| 1085 | MARK3     | ENSG00000075413 | 14:103467191-103468032:+    | 2.38E-09   | 0.062196467   | 0.152661616     |
| 1086 | MARK3     | ENSG00000075413 | 14:103491107-103491776:+    | 0.00325202 | 0.226303878   | 0.220926299     |
| 1087 | MARK3     | ENSG00000075413 | 14:103492034-103498501:+    | 0.00483064 | 0.039846251   | 0.031308218     |
| 1088 | CKB       | ENSG00000166165 | 14:103521434-103521817:-    | 0.00110156 | 0.102626721   | 0.074288486     |
| 1089 | ZFYVE21   | ENSG00000100711 | 14:103715979-103726791:+    | 0.0352399  | 0.096070514   | 0.075244356     |
| 1090 | ZFYVE21   | ENSG00000100711 | 14:103727914-103728907:+    | 0.00324721 | 0.147165009   | 0.116852997     |
| 1091 | ZFYVE21   | ENSG00000100711 | 14:103729182-103729792:+    | 0.00026599 | 0.288016378   | 0.23266766      |
| 1092 | ZFYVE21   | ENSG00000100711 | 14:103729182-103732619:+    | 0.03221083 | 0.106147979   | 0.092955066     |
| 1093 | PPP1R13B  | ENSG00000088808 | 14:103738812-103738885:-    | 0.00166564 | 0.097338083   | 0.072531564     |
| 1094 | TMEM179   | ENSG00000258986 | 14:104595243-104596989:-    | 0.00991686 | 0.139653998   | 0.110896944     |
| 1095 | AKT1      | ENSG00000142208 | 14:104770847-104772364:-    | 0.04895798 | 0.105073867   | 0.092847296     |
| 1096 | CEP170B   | ENSG00000099814 | 14:104876345-104877884:+    | 0.0016387  | 0.15091191    | 0.202009083     |
| 1097 | JAG2      | ENSG00000184916 | 14:105146724-105147325:-    | 0.00436358 | 0.281549896   | 0.213498635     |
| 1098 | BRF1      | ENSG00000185024 | 14:105211293-105212112:-    | 0.00336019 | 0.101133533   | 0.124369931     |
| 1099 | BRF1      | ENSG00000185024 | 14:105226290-105226633:-    | 0.01056314 | 0.083127698   | 0.104846079     |
| 1100 | PACS2     | ENSG00000179364 | 14:105382581-105382806:+    | 5.68E-07   | 0.093507628   | 0.04459614      |
| 1101 | PACS2     | ENSG00000179364 | 14:105382913-105383358:+    | 0.00033304 | 0.120002252   | 0.08148191      |
| 1102 | PACS2     | ENSG00000179364 | 14:105384987-105389960:+    | 0.00031016 | 0.397995366   | 0.367585065     |
| 1103 | PACS2     | ENSG00000179364 | 14:105390003-105391206:+    | 0.00683252 | 0.278038915   | 0.231026897     |
| 1104 | PACS2     | ENSG00000179364 | 14:105391249-105391630:+    | 0.00013124 | 0.364807146   | 0.300368701     |
| 1105 | LPCAT4    | ENSG00000176454 | 15:34359745-34360110:-      | 0.00092524 | 0.555724037   | 0.475000208     |
| 1106 | LPCAT4    | ENSG00000176454 | 15:34362321-34362572:-      | 1.20E-05   | 0.198896021   | 0.134627997     |
| 1107 | LPCAT4    | ENSG00000176454 | 15:34362655-34362781:-      | 2.86E-06   | 0.172493524   | 0.108941879     |
| 1108 | LPCAT4    | ENSG00000176454 | 15:34362836-34363421:-      | 0.00023367 | 0.406421671   | 0.323843688     |
| 1109 | LPCAT4    | ENSG00000176454 | 15:34363456-34363660:-      | 0.02400714 | 0.28726678    | 0.251048727     |
| 1110 | EIF2AK4   | ENSG00000128829 | 15:40032237-40032756:+      | 0.00996118 | 0.138018523   | 0.109528275     |
| 1111 | EIF2AK4   | ENSG00000128829 | 15:40034444-40035026:+      | 0.00040094 | 0.22902921    | 0.181820944     |
| 1112 | IVD       | ENSG00000128928 | 15:40415482-40416077:+      | 0.00318996 | 0.089499268   | 0.070379348     |
| 1113 | IVD       | ENSG00000128928 | 15:40416362-40418129:+      | 7.63E-05   | 0.152207477   | 0.107735927     |
| 1114 | RMDN3     | ENSG00000137824 | 15:40738576-40740132:-      | 0.00356427 | 0.17782717    | 0.153001113     |
| 1115 | DNAJC17   | ENSG00000104129 | 15:40774436-40775030:-      | 0.0411313  | 0.092487217   | 0.078297547     |
| 1116 | DNAJC17   | ENSG00000104129 | 15:40775108-40775552:-      | 0.00901939 | 0.101363356   | 0.080231968     |
| 1117 | ZFYVE19   | ENSG00000166140 | 15:40809240-40809407:+      | 0.00011678 | 0.258176116   | 0.20613897      |
| 1118 | ZFYVE19   | ENSG00000166140 | 15:40809970-40810070:+      | 0.04660403 | 0.102478371   | 0.086647955     |
| 1119 | ZFYVE19   | ENSG00000166140 | 15:40813417-40813712:+      | 0.00653829 | 0.119792788   | 0.101732157     |
| 1120 | ZFYVE19   | ENSG00000166140 | 15:40814070-40814147:+      | 1.56E-07   | 0.271225037   | 0.182189657     |
| 1121 | RTF1      | ENSG00000137815 | 15:41475819-41476445:+      | 0.00199002 | 0.108189956   | 0.083449983     |
| 1122 | TYRO3     | ENSG00000092445 | 15:41573815-41577885:+      | 0.0036399  | 0.192576967   | 0.161462247     |
| 1123 | MAPKBP1   | ENSG00000137802 | 15:41813781-41814549:+      | 0.04140698 | 0.08877371    | 0.114944174     |
| 1124 | MAPKBP1   | ENSG00000137802 | 15:41814739-41815258:+      | 0.02310054 | 0.064247322   | 0.087404464     |
| 1125 | MAPKBP1   | ENSG00000137802 | 15:41819379-41819594:+      | 0.00021303 | 0.435608378   | 0.330871662     |
| 1126 | MAPKBP1   | ENSG00000137802 | 15:41819650-41820831:+      | 0.02418824 | 0.068101439   | 0.084055001     |
| 1127 | MAPKBP1   | ENSG00000137802 | 15:41824061-41824483:+      | 0.00017709 | 0.426213415   | 0.484509273     |
| 1128 | JMJD7-PLA | ENSG00000168970 | 15:41841273-41841516:+      | 3.42E-05   | 0.317403866   | 0.24565146      |
| 1129 | JMJD7-PLA | ENSG00000168970 | 15:41841571-41841818:+      | 0.00230582 | 0.292290585   | 0.244499722     |
| 1130 | JMJD7-PLA | ENSG00000168970 | 15:41842276-41842553:+      | 0.0112346  | 0.555587427   | 0.495776078     |
| 1131 | JMJD7-PLA | ENSG00000168970 | 15:41843811-41844470:+      | 0.00166408 | 0.294270918   | 0.21867557      |
| 1132 | CDAN1     | ENSG00000140326 | 15:42725251-42725488:-      | 0.04905157 | 0.179415798   | 0.157519705     |
| 1133 | CDAN1     | ENSG00000140326 | 15:42728033-42728203:-      | 0.0023163  | 0.260967134   | 0.219603661     |
| 1134 | CDAN1     | ENSG00000140326 | 15:42728267-42728651:-      | 0.0026174  | 0.281868052   | 0.230018835     |
| 1135 | CDAN1     | ENSG00000140326 | 15:42735178-42735260:-      | 0.01657453 | 0.157312624   | 0.132473865     |
| 1136 | TUBGCP4   | ENSG00000137822 | 15:43404552-43405201:+      | 0.01036202 | 0.584462683   | 0.657645597     |
| 1137 | TP53BP1   | ENSG00000067369 | 15:43409096-43409646:-      | 0.00058338 | 0.525587232   | 0.592527519     |
| 1138 | ELL3      | ENSG00000128886 | 15:43774518-43774595:-      | 0.02265743 | 0.156227658   | 0.119642989     |
| 1139 | SPG11     | ENSG00000104133 | 15:44564698-44565853:-      | 0.0042861  | 0.122577445   | 0.098092912     |



| S/N  | Gene     | Ensembl ID      | Position of retained intron | p-value    | AD_IR_average | Cont_IR_average |
|------|----------|-----------------|-----------------------------|------------|---------------|-----------------|
| 1140 | SPG11    | ENSG00000104133 | 15:44566009-44566216:-      | 0.0259589  | 0.165287479   | 0.142025222     |
| 1141 | SPG11    | ENSG00000104133 | 15:44573745-44574901:-      | 0.00882405 | 0.100958949   | 0.084325326     |
| 1142 | GATM     | ENSG00000171766 | 15:45362221-45363899:-      | 0.01136901 | 0.133737618   | 0.109557392     |
| 1143 | SPATA5L1 | ENSG00000171763 | 15:45415779-45417268:+      | 0.00103959 | 0.09609763    | 0.067607329     |
| 1144 | SPATA5L1 | ENSG00000171763 | 15:45418682-45421042:+      | 0.00095424 | 0.147996277   | 0.114468848     |
| 1145 | CCPG1    | ENSG00000260916 | 15:55356409-55359538:-      | 0.00018919 | 0.25221705    | 0.169774597     |
| 1146 | VPS13C   | ENSG00000129003 | 15:61867947-61868658:-      | 0.00011309 | 0.293783387   | 0.191201965     |
| 1147 | TLN2     | ENSG00000171914 | 15:62836073-62838855:+      | 1.07E-05   | 0.090034851   | 0.056138365     |
| 1148 | TPM1     | ENSG00000140416 | 15:63060939-63061197:+      | 0.00530192 | 0.186894572   | 0.146041418     |
| 1149 | TPM1     | ENSG00000140416 | 15:63062645-63064063:+      | 6.37E-05   | 0.129074763   | 0.107325287     |
| 1150 | HERC1    | ENSG00000103657 | 15:63632811-63633847:-      | 0.0012004  | 0.140870567   | 0.098343275     |
| 1151 | SNX1     | ENSG00000028528 | 15:64136932-64137567:+      | 0.00534277 | 0.113677551   | 0.093240549     |
| 1152 | UBAP1L   | ENSG00000246922 | 15:65093231-65094474:-      | 0.00011    | 0.284406512   | 0.220256875     |
| 1153 | SNAPC5   | ENSG00000174446 | 15:66495419-66497641:-      | 1.15E-05   | 0.06495248    | 0.043368201     |
| 1154 | C15orf61 | ENSG00000189227 | 15:67521594-67526417:+      | 0.00098794 | 0.25035343    | 0.299692651     |
| 1155 | CORO2B   | ENSG00000103647 | 15:68711706-68713924:+      | 0.000956   | 0.291152866   | 0.241857778     |
| 1156 | CORO2B   | ENSG00000103647 | 15:68718810-68719143:+      | 0.0174499  | 0.314560878   | 0.300107208     |
| 1157 | PKM      | ENSG00000067225 | 15:72200655-72202453:-      | 8.61E-07   | 0.169872321   | 0.130068197     |
| 1158 | PKM      | ENSG00000067225 | 15:72200655-72203021:-      | 0.00047923 | 0.161864591   | 0.120015245     |
| 1159 | PARP6    | ENSG00000137817 | 15:72250092-72250844:-      | 0.01217559 | 0.114504766   | 0.109714745     |
| 1160 | PARP6    | ENSG00000137817 | 15:72250954-72251206:-      | 0.01491551 | 0.076002573   | 0.070670807     |
| 1161 | HEXA     | ENSG00000213614 | 15:72344140-72345445:-      | 8.59E-10   | 0.335844246   | 0.232887138     |
| 1162 | HEXA     | ENSG00000213614 | 15:72346325-72346526:-      | 2.53E-10   | 0.07977564    | 0.045347814     |
| 1163 | HEXA     | ENSG00000213614 | 15:72346710-72347685:-      | 7.59E-05   | 0.139704361   | 0.106351955     |
| 1164 | CLK3     | ENSG00000179335 | 15:74622560-74624901:+      | 0.00021762 | 0.125668594   | 0.098673614     |
| 1165 | CSK      | ENSG00000103653 | 15:74798312-74798614:+      | 0.01050027 | 0.103808254   | 0.127360213     |
| 1166 | CSK      | ENSG00000103653 | 15:74802083-74802330:+      | 0.00049098 | 0.158172112   | 0.119259769     |
| 1167 | ULK3     | ENSG00000140474 | 15:74837798-74838151:-      | 0.00465479 | 0.242375195   | 0.208473448     |
| 1168 | ULK3     | ENSG00000140474 | 15:74838192-74838265:-      | 0.00094379 | 0.186446551   | 0.147198161     |
| 1169 | ULK3     | ENSG00000140474 | 15:74839050-74839267:-      | 0.00013977 | 0.111641843   | 0.075962875     |
| 1170 | ULK3     | ENSG00000140474 | 15:74839373-74839557:-      | 5.85E-05   | 0.179829494   | 0.121173601     |
| 1171 | ULK3     | ENSG00000140474 | 15:74839713-74840233:-      | 0.00831123 | 0.113424479   | 0.085216342     |
| 1172 | SCAMP2   | ENSG00000140497 | 15:74845593-74848599:-      | 0.00106486 | 0.174075633   | 0.129597449     |
| 1173 | COMMD4   | ENSG00000140365 | 15:75338685-75338984:+      | 0.01619989 | 0.165407459   | 0.132644849     |
| 1174 | COMMD4   | ENSG00000140365 | 15:75339104-75339263:+      | 0.04754197 | 0.307465537   | 0.262225506     |
| 1175 | COMMD4   | ENSG00000140365 | 15:75339344-75339701:+      | 0.02366513 | 0.469427256   | 0.404553857     |
| 1176 | NEIL1    | ENSG00000140398 | 15:75352387-75352601:+      | 0.02566314 | 0.095009701   | 0.117942181     |
| 1177 | NEIL1    | ENSG00000140398 | 15:75354818-75354963:+      | 0.00102467 | 0.179707959   | 0.147166292     |
| 1178 | MAN2C1   | ENSG00000140400 | 15:75358808-75359058:-      | 0.00059966 | 0.107759535   | 0.077577944     |
| 1179 | RCN2     | ENSG00000117906 | 15:76948552-76949069:+      | 0.03894047 | 0.212145354   | 0.184140987     |
| 1180 | RASGRF1  | ENSG00000058335 | 15:78973420-78980619:-      | 0.01555279 | 0.07372694    | 0.082807706     |
| 1181 | AP3B2    | ENSG00000103723 | 15:82661922-82662167:-      | 2.43E-07   | 0.14822296    | 0.09474597      |
| 1182 | AP3B2    | ENSG00000103723 | 15:82662252-82662693:-      | 3.29E-06   | 0.43960111    | 0.356833416     |
| 1183 | AP3B2    | ENSG00000103723 | 15:82662922-82663126:-      | 1.59E-06   | 0.23257811    | 0.169464756     |
| 1184 | AP3B2    | ENSG00000103723 | 15:82663233-82663559:-      | 0.00014105 | 0.234096382   | 0.18420881      |
| 1185 | AP3B2    | ENSG00000103723 | 15:82663620-82663800:-      | 4.36E-05   | 0.16412157    | 0.122837906     |
| 1186 | AP3B2    | ENSG00000103723 | 15:82678167-82679728:-      | 0.00570065 | 0.114792971   | 0.093827965     |
| 1187 | ZNF592   | ENSG00000166716 | 15:84798045-84798314:+      | 0.00057232 | 0.300871521   | 0.24726953      |
| 1188 | ZNF592   | ENSG00000166716 | 15:84798474-84798587:+      | 0.00892281 | 0.098668661   | 0.081653238     |
| 1189 | SEMA4B   | ENSG00000185033 | 15:90217602-90217766:+      | 0.0026072  | 0.143185709   | 0.109144983     |
| 1190 | SEMA4B   | ENSG00000185033 | 15:90221093-90221366:+      | 2.68E-05   | 0.095591385   | 0.066836419     |
| 1191 | CIB1     | ENSG00000185043 | 15:90231022-90231094:-      | 0.01193883 | 0.109119444   | 0.082531423     |
| 1192 | FURIN    | ENSG00000140564 | 15:90877024-90877134:+      | 0.0217677  | 0.166829645   | 0.133541049     |
| 1193 | FURIN    | ENSG00000140564 | 15:90877211-90877526:+      | 0.03210652 | 0.138813556   | 0.124385645     |
| 1194 | FURIN    | ENSG00000140564 | 15:90877615-90878131:+      | 0.00035433 | 0.141732505   | 0.10947151      |
| 1195 | FURIN    | ENSG00000140564 | 15:90879984-90880093:+      | 0.0369563  | 0.143280163   | 0.1209252       |
| 1196 | MAN2A2   | ENSG00000196547 | 15:90912279-90912541:+      | 0.01234447 | 0.269307659   | 0.332315844     |



| S/N  | Gene      | Ensembl ID      | Position of retained intron | p-value    | AD_IR_average | Cont_IR_average |
|------|-----------|-----------------|-----------------------------|------------|---------------|-----------------|
| 1197 | MAN2A2    | ENSG00000196547 | 15:90913406-90913613:+      | 0.03555035 | 0.123075491   | 0.150330012     |
| 1198 | MAN2A2    | ENSG00000196547 | 15:90916256-90918193:+      | 0.00031613 | 0.126260513   | 0.172717955     |
| 1199 | UNC45A    | ENSG00000140553 | 15:90940473-90942436:+      | 0.00100642 | 0.102531107   | 0.14363643      |
| 1200 | UNC45A    | ENSG00000140553 | 15:90948283-90948653:+      | 2.22E-07   | 0.411779524   | 0.312749266     |
| 1201 | VPS33B    | ENSG00000184056 | 15:91005119-91005379:-      | 2.66E-09   | 0.238449776   | 0.169273619     |
| 1202 | VPS33B    | ENSG00000184056 | 15:91005454-91005693:-      | 0.00203053 | 0.230877134   | 0.18465421      |
| 1203 | VPS33B    | ENSG00000184056 | 15:91005784-91005972:-      | 1.56E-05   | 0.117612422   | 0.078238309     |
| 1204 | SYNM      | ENSG00000182253 | 15:99131813-99132749:+      | 0.01029716 | 0.390226402   | 0.317272487     |
| 1205 | LINS1     | ENSG00000140471 | 15:100570117-100571893:-    | 0.01932814 | 0.124020711   | 0.093687399     |
| 1206 | SNRPA1    | ENSG00000131876 | 15:101285801-101286907:-    | 0.01954163 | 0.23013396    | 0.253602013     |
| 1207 | TM2D3     | ENSG00000184277 | 15:101645162-101646724:-    | 0.00060094 | 0.101895035   | 0.138814938     |
| 1208 | RHBDF1    | ENSG00000007384 | 16:58759-58973:-            | 0.00034972 | 0.181529085   | 0.115329676     |
| 1209 | NPRL3     | ENSG00000103148 | 16:88890-89712:-            | 1.56E-05   | 0.152191538   | 0.108719423     |
| 1210 | NPRL3     | ENSG00000103148 | 16:89902-92595:-            | 0.00385574 | 0.186358494   | 0.152750305     |
| 1211 | NPRL3     | ENSG00000103148 | 16:92725-93218:-            | 0.04875004 | 0.168571849   | 0.143005327     |
| 1212 | NPRL3     | ENSG00000103148 | 16:125073-130521:-          | 0.00488307 | 0.029416126   | 0.034272812     |
| 1213 | RGS11     | ENSG00000076344 | 16:271099-271201:-          | 0.00057931 | 0.135464555   | 0.094654742     |
| 1214 | RGS11     | ENSG00000076344 | 16:271315-271398:-          | 0.00896847 | 0.115638815   | 0.088233805     |
| 1215 | RGS11     | ENSG00000076344 | 16:271569-272862:-          | 0.03415696 | 0.293032524   | 0.258335597     |
| 1216 | RGS11     | ENSG00000076344 | 16:272931-273474:-          | 0.00283825 | 0.215289283   | 0.167598135     |
| 1217 | RGS11     | ENSG00000076344 | 16:275082-275282:-          | 1.34E-06   | 0.478365329   | 0.35081274      |
| 1218 | PDIA2     | ENSG00000185615 | 16:284593-284658:+          | 0.0006716  | 0.407863088   | 0.295846104     |
| 1219 | PDIA2     | ENSG00000185615 | 16:284792-284877:+          | 0.02733675 | 0.253337634   | 0.204892714     |
| 1220 | PDIA2     | ENSG00000185615 | 16:285015-285083:+          | 0.00016123 | 0.442707207   | 0.345622403     |
| 1221 | PDIA2     | ENSG00000185615 | 16:285200-285311:+          | 0.0039286  | 0.369919683   | 0.305040649     |
| 1222 | AXIN1     | ENSG00000103126 | 16:289607-293487:-          | 0.00035723 | 0.275877354   | 0.237241362     |
| 1223 | AXIN1     | ENSG00000103126 | 16:298251-304303:-          | 0.04327032 | 0.076558229   | 0.088172927     |
| 1224 | MRPL28    | ENSG00000086504 | 16:368635-369067:-          | 0.00081367 | 0.146863217   | 0.117532319     |
| 1225 | TMEM8A    | ENSG00000129925 | 16:374151-374220:-          | 1.00E-04   | 0.109273159   | 0.070303801     |
| 1226 | TMEM8A    | ENSG00000129925 | 16:376455-376543:-          | 9.57E-06   | 0.21015101    | 0.301658723     |
| 1227 | TMEM8A    | ENSG00000129925 | 16:376812-377036:-          | 0.0001438  | 0.190459393   | 0.124532945     |
| 1228 | RAB11FIP3 | ENSG00000090565 | 16:489000-496823:+          | 0.00768372 | 0.137402988   | 0.134768908     |
| 1229 | RAB11FIP3 | ENSG00000090565 | 16:496859-503003:+          | 0.0015967  | 0.149558622   | 0.189885458     |
| 1230 | CAPN15    | ENSG00000103326 | 16:551664-552050:+          | 4.75E-06   | 0.356892024   | 0.252843071     |
| 1231 | PIGQ      | ENSG00000007541 | 16:578505-578784:+          | 0.00133657 | 0.258697763   | 0.194485866     |
| 1232 | PIGQ      | ENSG00000007541 | 16:578938-579068:+          | 0.0062602  | 0.149699157   | 0.11400869      |
| 1233 | PIGQ      | ENSG00000007541 | 16:580263-580857:+          | 0.02010027 | 0.433079854   | 0.377641581     |
| 1234 | METTL26   | ENSG00000130731 | 16:634797-634888:-          | 0.00684247 | 0.076510339   | 0.058488065     |
| 1235 | METTL26   | ENSG00000130731 | 16:635774-636093:-          | 0.00029059 | 0.141103183   | 0.12075761      |
| 1236 | MCRIP2    | ENSG00000172366 | 16:642043-642119:+          | 1.16E-06   | 0.106012757   | 0.062487585     |
| 1237 | MCRIP2    | ENSG00000172366 | 16:642249-646471:+          | 1.52E-05   | 0.278585456   | 0.224946021     |
| 1238 | MCRIP2    | ENSG00000172366 | 16:646608-647416:+          | 0.00039322 | 0.277772926   | 0.230517649     |
| 1239 | MCRIP2    | ENSG00000172366 | 16:647544-647782:+          | 4.05E-05   | 0.27166278    | 0.206544197     |
| 1240 | MCRIP2    | ENSG00000172366 | 16:647884-648119:+          | 0.01227372 | 0.243006183   | 0.204004477     |
| 1241 | WDR90     | ENSG00000161996 | 16:666792-666904:+          | 0.01416932 | 0.139845932   | 0.120993278     |
| 1242 | RHOT2     | ENSG00000140983 | 16:668236-668352:+          | 0.00804935 | 0.105649606   | 0.079807913     |
| 1243 | RHOT2     | ENSG00000140983 | 16:670175-670248:+          | 0.00231101 | 0.138780611   | 0.100729505     |
| 1244 | RHOT2     | ENSG00000140983 | 16:670773-670891:+          | 0.00650986 | 0.512918524   | 0.452058883     |
| 1245 | RHOT2     | ENSG00000140983 | 16:672566-672702:+          | 0.04570144 | 0.254671838   | 0.212134797     |
| 1246 | RHBDL1    | ENSG00000103269 | 16:677388-677458:+          | 6.17E-07   | 0.649516256   | 0.495633039     |
| 1247 | JMJD8     | ENSG00000161999 | 16:682874-682952:-          | 0.0134723  | 0.174766146   | 0.138606805     |
| 1248 | JMJD8     | ENSG00000161999 | 16:683087-683166:-          | 0.03746538 | 0.19848096    | 0.165663157     |
| 1249 | JMJD8     | ENSG00000161999 | 16:683441-683529:-          | 0.00274443 | 0.453544159   | 0.392900117     |
| 1250 | METRNL    | ENSG00000103260 | 16:715984-716932:+          | 3.82E-07   | 0.136599729   | 0.091203744     |
| 1251 | FAM173A   | ENSG00000103254 | 16:721436-721597:+          | 0.02539994 | 0.698584402   | 0.665452364     |
| 1252 | FAM173A   | ENSG00000103254 | 16:721941-722083:+          | 0.00036375 | 0.558653207   | 0.512937494     |
| 1253 | FAM173A   | ENSG00000103254 | 16:722134-722308:+          | 0.00176782 | 0.300407841   | 0.299140506     |

| S/N  | Gene     | Ensembl ID      | Position of retained intron | p-value    | AD_IR_average | Cont_IR_average |
|------|----------|-----------------|-----------------------------|------------|---------------|-----------------|
| 1254 | NARFL    | ENSG00000103245 | 16:731000-731564:-          | 0.00875785 | 0.102139996   | 0.080528409     |
| 1255 | RPUSD1   | ENSG00000007376 | 16:786377-786826:-          | 0.00483112 | 0.214117465   | 0.176583561     |
| 1256 | RPUSD1   | ENSG00000007376 | 16:787179-787353:-          | 7.30E-09   | 0.244641129   | 0.181507503     |
| 1257 | GNPTG    | ENSG00000090581 | 16:1352306-1361742:+        | 0.02540089 | 0.204992035   | 0.185215261     |
| 1258 | GNPTG    | ENSG00000090581 | 16:1362320-1362451:+        | 2.24E-07   | 0.152523538   | 0.103362709     |
| 1259 | CCDC154  | ENSG00000197599 | 16:1434852-1435088:-        | 0.00804247 | 0.295526854   | 0.235741365     |
| 1260 | CLCN7    | ENSG00000103249 | 16:1449093-1449275:-        | 0.00800349 | 0.257461016   | 0.210439292     |
| 1261 | CLCN7    | ENSG00000103249 | 16:1449327-1450496:-        | 0.0012912  | 0.541511744   | 0.468672857     |
| 1262 | TELO2    | ENSG00000100726 | 16:1493605-1494245:+        | 0.00054763 | 0.06766872    | 0.092046244     |
| 1263 | TELO2    | ENSG00000100726 | 16:1507051-1507305:+        | 6.29E-07   | 0.36738454    | 0.243217606     |
| 1264 | TELO2    | ENSG00000100726 | 16:1507370-1507600:+        | 3.84E-08   | 0.273671473   | 0.179343199     |
| 1265 | CRAMP1   | ENSG00000007545 | 16:1641187-1652495:+        | 0.01202416 | 0.08379821    | 0.115835575     |
| 1266 | CRAMP1   | ENSG00000007545 | 16:1669165-1670663:+        | 0.00519432 | 0.178294301   | 0.226923822     |
| 1267 | CRAMP1   | ENSG00000007545 | 16:1670809-1673880:+        | 0.00340344 | 0.104062502   | 0.139430753     |
| 1268 | MAPK8IP3 | ENSG00000138834 | 16:1758159-1758977:+        | 0.01776556 | 0.077514627   | 0.097980661     |
| 1269 | MAPK8IP3 | ENSG00000138834 | 16:1758159-1759957:+        | 0.00070205 | 0.043276678   | 0.056675        |
| 1270 | NME3     | ENSG00000103024 | 16:1770993-1771069:-        | 0.01030766 | 0.198460099   | 0.161441945     |
| 1271 | NME3     | ENSG00000103024 | 16:1771410-1771488:-        | 3.84E-07   | 0.260650317   | 0.179500435     |
| 1272 | SPSB3    | ENSG00000162032 | 16:1778321-1778434:-        | 0.00358682 | 0.324392805   | 0.376372675     |
| 1273 | NUBP2    | ENSG00000095906 | 16:1786655-1787676:+        | 4.21E-05   | 0.258639451   | 0.251895597     |
| 1274 | ZNF598   | ENSG00000167962 | 16:2001191-2001582:-        | 0.00224665 | 0.081719426   | 0.101426268     |
| 1275 | ZNF598   | ENSG00000167962 | 16:2001700-2002205:-        | 0.01097403 | 0.212870039   | 0.254898403     |
| 1276 | ZNF598   | ENSG00000167962 | 16:2002423-2002520:-        | 0.00898814 | 0.094948739   | 0.120950158     |
| 1277 | ZNF598   | ENSG00000167962 | 16:2002732-2002990:-        | 0.00466103 | 0.08705972    | 0.117970252     |
| 1278 | TSC2     | ENSG00000103197 | 16:2054440-2055401:+        | 0.00133859 | 0.070021724   | 0.098827693     |
| 1279 | TSC2     | ENSG00000103197 | 16:2080377-2081594:+        | 0.00093917 | 0.071088517   | 0.094458249     |
| 1280 | TSC2     | ENSG00000103197 | 16:2081798-2083694:+        | 0.01492249 | 0.30205389    | 0.324099974     |
| 1281 | TSC2     | ENSG00000103197 | 16:2085026-2085229:+        | 0.00312491 | 0.260213372   | 0.187087371     |
| 1282 | PKD1     | ENSG00000008710 | 16:2114925-2115377:-        | 0.00648952 | 0.077015012   | 0.104985287     |
| 1283 | RAB26    | ENSG00000167964 | 16:2152885-2152988:+        | 0.04103382 | 0.253819707   | 0.207248626     |
| 1284 | RAB26    | ENSG00000167964 | 16:2153222-2153318:+        | 0.00036181 | 0.113141573   | 0.150616169     |
| 1285 | CASKIN1  | ENSG00000167971 | 16:2181929-2183645:-        | 0.02354134 | 0.081243949   | 0.097187992     |
| 1286 | CASKIN1  | ENSG00000167971 | 16:2186824-2186977:-        | 6.76E-06   | 0.275029037   | 0.188037656     |
| 1287 | CASKIN1  | ENSG00000167971 | 16:2187072-2187165:-        | 5.76E-07   | 0.64821622    | 0.536896597     |
| 1288 | E4F1     | ENSG00000167967 | 16:2228523-2229569:+        | 0.00560923 | 0.080704626   | 0.102457301     |
| 1289 | E4F1     | ENSG00000167967 | 16:2229675-2232170:+        | 2.77E-05   | 0.170676411   | 0.229051618     |
| 1290 | E4F1     | ENSG00000167967 | 16:2233647-2233881:+        | 0.00245425 | 0.193145177   | 0.152915283     |
| 1291 | ABCA3    | ENSG00000167972 | 16:2283358-2284278:-        | 0.02941807 | 0.234658207   | 0.216608039     |
| 1292 | ABCA3    | ENSG00000167972 | 16:2304150-2308449:-        | 0.00047366 | 0.277039999   | 0.2325111       |
| 1293 | TBC1D24  | ENSG00000162065 | 16:2499420-2499834:+        | 0.00260234 | 0.339458317   | 0.300547153     |
| 1294 | KCTD5    | ENSG00000167977 | 16:2702478-2707297:+        | 0.03000415 | 0.126001076   | 0.105439595     |
| 1295 | HCFC1R1  | ENSG00000103145 | 16:3023361-3023846:-        | 0.00011135 | 0.149886229   | 0.170564047     |
| 1296 | THOC6    | ENSG00000131652 | 16:3026413-3026515:+        | 0.0216727  | 0.097080306   | 0.070937314     |
| 1297 | ZNF205   | ENSG00000122386 | 16:3116547-3118904:+        | 0.04545113 | 0.116903795   | 0.133878669     |
| 1298 | NAA60    | ENSG00000122390 | 16:3485061-3485466:+        | 0.00033021 | 0.292210073   | 0.348929        |
| 1299 | CLUAP1   | ENSG00000103351 | 16:3532841-3536121:+        | 7.30E-05   | 0.131943278   | 0.160232244     |
| 1300 | SLX4     | ENSG00000188827 | 16:3582693-3583096:-        | 0.03249684 | 0.299388585   | 0.247217468     |
| 1301 | TRAP1    | ENSG00000126602 | 16:3658230-3658792:-        | 1.38E-12   | 0.156447287   | 0.094936027     |
| 1302 | TRAP1    | ENSG00000126602 | 16:3658865-3661986:-        | 5.43E-11   | 0.207960327   | 0.13412497      |
| 1303 | TRAP1    | ENSG00000126602 | 16:3662132-3662881:-        | 7.77E-05   | 0.181714923   | 0.139223873     |
| 1304 | TRAP1    | ENSG00000126602 | 16:3662967-3663423:-        | 2.88E-06   | 0.236539063   | 0.180969465     |
| 1305 | TRAP1    | ENSG00000126602 | 16:3663562-3664273:-        | 1.30E-05   | 0.23374514    | 0.180782082     |
| 1306 | CREBBP   | ENSG00000005339 | 16:3736815-3738558:-        | 0.00015535 | 0.103895344   | 0.187559617     |
| 1307 | GLIS2    | ENSG00000126603 | 16:4335393-4336724:+        | 0.02193243 | 0.115134566   | 0.140055205     |
| 1308 | MGRN1    | ENSG00000102858 | 16:4673657-4677462:+        | 0.03691161 | 0.073459138   | 0.06765986      |
| 1309 | MGRN1    | ENSG00000102858 | 16:4680097-4681549:+        | 0.00748683 | 0.11671927    | 0.123592095     |
| 1310 | MGRN1    | ENSG00000102858 | 16:4686303-4688795:+        | 0.00901305 | 0.498778622   | 0.459967078     |

| S/N  | Gene     | Ensembl ID      | Position of retained intron | p-value    | AD_IR_average | Cont_IR_average |
|------|----------|-----------------|-----------------------------|------------|---------------|-----------------|
| 1311 | ANKS3    | ENSG00000168096 | 16:4714186-4724749:-        | 0.00870921 | 0.068993506   | 0.081940174     |
| 1312 | ROGDI    | ENSG00000067836 | 16:4801321-4801502:-        | 0.00051688 | 0.219318852   | 0.205702732     |
| 1313 | GLYR1    | ENSG00000140632 | 16:4812248-4813736:-        | 0.00074532 | 0.112989685   | 0.089712047     |
| 1314 | GLYR1    | ENSG00000140632 | 16:4813838-4814536:-        | 0.01599277 | 0.128543759   | 0.10716081      |
| 1315 | C16orf89 | ENSG00000153446 | 16:5044478-5047877:-        | 0.00040993 | 0.101975633   | 0.068203293     |
| 1316 | C16orf89 | ENSG00000153446 | 16:5047964-5055245:-        | 4.04E-07   | 0.095718082   | 0.055881021     |
| 1317 | CARHSP1  | ENSG00000153048 | 16:8855326-8858349:-        | 0.01363467 | 0.088360511   | 0.112310257     |
| 1318 | CARHSP1  | ENSG00000153048 | 16:8858472-8859170:-        | 0.0386186  | 0.175043962   | 0.206117375     |
| 1319 | USP7     | ENSG00000187555 | 16:8902187-8902380:-        | 0.03059011 | 0.154168139   | 0.119584595     |
| 1320 | NUBP1    | ENSG00000103274 | 16:10756780-10757872:+      | 0.01833931 | 0.203423962   | 0.175293196     |
| 1321 | ZC3H7A   | ENSG00000122299 | 16:11761511-11761909:-      | 0.00173629 | 0.180843237   | 0.13705084      |
| 1322 | ZC3H7A   | ENSG00000122299 | 16:11762043-11762670:-      | 0.00279242 | 0.1981677     | 0.156253383     |
| 1323 | ZC3H7A   | ENSG00000122299 | 16:11762747-11763477:-      | 0.03239681 | 0.14277724    | 0.124429255     |
| 1324 | KIAA0430 | ENSG00000166783 | 16:15600701-15601990:-      | 0.00883006 | 0.091056614   | 0.15097894      |
| 1325 | COQ7     | ENSG00000167186 | 16:19075860-19077305:+      | 1.34E-06   | 0.120325796   | 0.091381738     |
| 1326 | COQ7     | ENSG00000167186 | 16:19077374-19078080:+      | 3.09E-06   | 0.123872885   | 0.091467265     |
| 1327 | CCP110   | ENSG00000103540 | 16:19546474-19547954:+      | 0.03493259 | 0.224519584   | 0.197585532     |
| 1328 | C16orf62 | ENSG00000103544 | 16:19691471-19699501:+      | 2.18E-07   | 0.121556907   | 0.087961775     |
| 1329 | EEF2K    | ENSG00000103319 | 16:22258695-22260461:+      | 7.57E-05   | 0.248021448   | 0.17545054      |
| 1330 | GGA2     | ENSG00000103365 | 16:23478501-23478882:-      | 0.00057269 | 0.167449135   | 0.137631732     |
| 1331 | GTF3C1   | ENSG00000077235 | 16:27463592-27464319:-      | 0.00140553 | 0.325066205   | 0.266211675     |
| 1332 | GTF3C1   | ENSG00000077235 | 16:27470395-27471747:-      | 4.76E-05   | 0.119192154   | 0.081597955     |
| 1333 | CLN3     | ENSG00000188603 | 16:28482198-28482326:-      | 2.52E-05   | 0.20432622    | 0.149517518     |
| 1334 | SGF29    | ENSG00000176476 | 16:28590935-28591589:+      | 1.28E-05   | 0.13708179    | 0.091593405     |
| 1335 | ATXN2L   | ENSG00000168488 | 16:28824542-28825365:+      | 0.04087993 | 0.101165876   | 0.09036141      |
| 1336 | ATXN2L   | ENSG00000168488 | 16:28833354-28833438:+      | 0.00012021 | 0.107966982   | 0.069751716     |
| 1337 | ATXN2L   | ENSG00000168488 | 16:28833508-28834064:+      | 0.00011308 | 0.11430298    | 0.075348649     |
| 1338 | SH2B1    | ENSG00000178188 | 16:28873269-28873446:+      | 0.00025689 | 0.078692828   | 0.059709965     |
| 1339 | NFATC2IP | ENSG00000176953 | 16:28956058-28956150:+      | 0.03038917 | 0.467118927   | 0.418910597     |
| 1340 | NFATC2IP | ENSG00000176953 | 16:28958861-28958990:+      | 0.00111926 | 0.179519178   | 0.13144264      |
| 1341 | SPNS1    | ENSG00000169682 | 16:28981615-28981900:+      | 2.73E-05   | 0.303693549   | 0.242452496     |
| 1342 | SPNS1    | ENSG00000169682 | 16:28982056-28982355:+      | 2.39E-05   | 0.314569695   | 0.242183639     |
| 1343 | SPNS1    | ENSG00000169682 | 16:28982545-28982856:+      | 5.98E-07   | 0.200075095   | 0.147100162     |
| 1344 | SPNS1    | ENSG00000169682 | 16:28982922-28983191:+      | 1.12E-08   | 0.099209906   | 0.058889562     |
| 1345 | LAT      | ENSG00000213658 | 16:28986569-28986656:+      | 0.0073177  | 0.116083038   | 0.078310298     |
| 1346 | KIF22    | ENSG00000079616 | 16:29803608-29803997:+      | 2.97E-06   | 0.129491644   | 0.082342969     |
| 1347 | KIF22    | ENSG00000079616 | 16:29805174-29805262:+      | 0.00090642 | 0.177295987   | 0.125791694     |
| 1348 | CDIPT    | ENSG00000103502 | 16:29860662-29861105:-      | 0.04808683 | 0.107762448   | 0.094753156     |
| 1349 | ASPHD1   | ENSG00000174939 | 16:29904965-29905787:+      | 1.51E-08   | 0.129572471   | 0.080276187     |
| 1350 | KCTD13   | ENSG00000174943 | 16:29911867-29911959:-      | 0.00029088 | 0.29554311    | 0.236281838     |
| 1351 | TAOK2    | ENSG00000149930 | 16:29989805-29990783:+      | 0.0405531  | 0.235785422   | 0.219234381     |
| 1352 | HIRIP3   | ENSG00000149929 | 16:29993557-29993639:-      | 0.0054911  | 0.218876549   | 0.180620616     |
| 1353 | INO80E   | ENSG00000169592 | 16:30001040-30005220:+      | 0.00426458 | 0.278503972   | 0.286193532     |
| 1354 | PPP4C    | ENSG00000149923 | 16:30076475-30081258:+      | 4.35E-06   | 0.169517226   | 0.125596862     |
| 1355 | PPP4C    | ENSG00000149923 | 16:30081310-30082483:+      | 0.00190613 | 0.132313173   | 0.106354699     |
| 1356 | PPP4C    | ENSG00000149923 | 16:30082534-30082745:+      | 0.02458056 | 0.123446207   | 0.105326904     |
| 1357 | PPP4C    | ENSG00000149923 | 16:30082847-30083393:+      | 0.00420947 | 0.266058037   | 0.224500284     |
| 1358 | GDPD3    | ENSG00000102886 | 16:30113064-30113339:-      | 0.02176215 | 0.290381756   | 0.345889805     |
| 1359 | CORO1A   | ENSG00000102879 | 16:30187501-30187724:+      | 0.00012837 | 0.17165828    | 0.127109783     |
| 1360 | TBC1D10B | ENSG00000169221 | 16:30365006-30365104:-      | 0.00134206 | 0.094096289   | 0.072136309     |
| 1361 | PRR14    | ENSG00000156858 | 16:30652842-30652913:+      | 0.03166736 | 0.166542678   | 0.136676297     |
| 1362 | PRR14    | ENSG00000156858 | 16:30653408-30654229:+      | 0.04712875 | 0.116446671   | 0.103003792     |
| 1363 | PRR14    | ENSG00000156858 | 16:30654339-30654628:+      | 0.00142197 | 0.103452726   | 0.086838751     |
| 1364 | FBRS     | ENSG00000156860 | 16:30664920-30665034:+      | 0.00262391 | 0.179455094   | 0.139875919     |
| 1365 | FBRS     | ENSG00000156860 | 16:30665079-30665305:+      | 0.00066424 | 0.238644063   | 0.191630142     |
| 1366 | FBRS     | ENSG00000156860 | 16:30665706-30666511:+      | 0.00080818 | 0.108807507   | 0.080296193     |
| 1367 | FBRS     | ENSG00000156860 | 16:30666541-30666918:+      | 0.01126889 | 0.126308513   | 0.103571002     |

| S/N  | Gene      | Ensembl ID      | Position of retained intron | p-value    | AD_IR_average | Cont_IR_average |
|------|-----------|-----------------|-----------------------------|------------|---------------|-----------------|
| 1368 | FBRS      | ENSG00000156860 | 16:30666990-30667319:+      | 0.00957966 | 0.135102255   | 0.107335783     |
| 1369 | FBRS      | ENSG00000156860 | 16:30667622-30668559:+      | 0.00577618 | 0.133118738   | 0.108552626     |
| 1370 | FBRS      | ENSG00000156860 | 16:30668643-30668771:+      | 0.02733243 | 0.140840468   | 0.117218923     |
| 1371 | PHKG2     | ENSG00000156873 | 16:30751603-30753231:+      | 2.88E-06   | 0.247469874   | 0.175059164     |
| 1372 | PHKG2     | ENSG00000156873 | 16:30753297-30753393:+      | 0.00137438 | 0.142833984   | 0.113801004     |
| 1373 | FBXL19    | ENSG00000099364 | 16:30928499-30930072:+      | 7.60E-08   | 0.103119244   | 0.064702613     |
| 1374 | BCKDK     | ENSG00000103507 | 16:31109783-31110076:+      | 0.02452557 | 0.097914339   | 0.088618939     |
| 1375 | FUS       | ENSG00000089280 | 16:31185179-31186801:+      | 0.00453797 | 0.298760005   | 0.245599404     |
| 1376 | FUS       | ENSG00000089280 | 16:31186836-31188324:+      | 0.02302823 | 0.297998483   | 0.262016848     |
| 1377 | FUS       | ENSG00000089280 | 16:31189226-31189664:+      | 3.15E-08   | 0.191779959   | 0.113261944     |
| 1378 | C16orf58  | ENSG00000140688 | 16:31493524-31493602:-      | 0.02289004 | 0.588624732   | 0.532938922     |
| 1379 | GNAO1     | ENSG00000087258 | 16:56336860-56340833:+      | 0.00027781 | 0.049184902   | 0.047561969     |
| 1380 | OGFOD1    | ENSG00000087263 | 16:56467293-56467904:+      | 0.02029273 | 0.169015267   | 0.247930096     |
| 1381 | BBS2      | ENSG00000125124 | 16:56470614-56484760:-      | 5.60E-10   | 0.189930482   | 0.120657231     |
| 1382 | COQ9      | ENSG00000088682 | 16:57457015-57458245:+      | 3.06E-06   | 0.446595634   | 0.331582883     |
| 1383 | COQ9      | ENSG00000088682 | 16:57458350-57459564:+      | 4.23E-06   | 0.32689528    | 0.246829031     |
| 1384 | COQ9      | ENSG00000088682 | 16:57459720-57460050:+      | 0.00255272 | 0.177158089   | 0.144347179     |
| 1385 | COQ9      | ENSG00000088682 | 16:57460104-57460588:+      | 0.00066796 | 0.146003523   | 0.116943387     |
| 1386 | POLR2C    | ENSG00000102978 | 16:57470354-57470974:+      | 0.04149198 | 0.095033939   | 0.08388516      |
| 1387 | KATNB1    | ENSG00000140854 | 16:57752928-57753076:+      | 0.00116533 | 0.22803629    | 0.180337673     |
| 1388 | KATNB1    | ENSG00000140854 | 16:57753519-57753944:+      | 0.00020305 | 0.135945137   | 0.093689623     |
| 1389 | KATNB1    | ENSG00000140854 | 16:57756472-57756813:+      | 0.00011966 | 0.178396596   | 0.130276688     |
| 1390 | KIFC3     | ENSG00000140859 | 16:57758909-57759124:-      | 0.00231302 | 0.282408511   | 0.23386733      |
| 1391 | NDRG4     | ENSG00000103034 | 16:58500269-58500987:+      | 0.03294302 | 0.116767537   | 0.127670371     |
| 1392 | NDRG4     | ENSG00000103034 | 16:58509352-58511421:+      | 0.00023467 | 0.288447915   | 0.226696292     |
| 1393 | SETD6     | ENSG00000103037 | 16:58516672-58516807:+      | 0.00206219 | 0.26360681    | 0.328078522     |
| 1394 | SETD6     | ENSG00000103037 | 16:58518231-58518400:+      | 0.03951463 | 0.250958506   | 0.28696574      |
| 1395 | CNOT1     | ENSG00000125107 | 16:58521036-58521182:-      | 5.53E-09   | 0.272251279   | 0.184264086     |
| 1396 | CNOT1     | ENSG00000125107 | 16:58521317-58523369:-      | 1.70E-05   | 0.299460098   | 0.233408049     |
| 1397 | SLC38A7   | ENSG00000103042 | 16:58670167-58671044:-      | 0.03272217 | 0.112562237   | 0.087846644     |
| 1398 | CKLF      | ENSG00000217555 | 16:66563217-66565885:+      | 0.00565555 | 0.259537588   | 0.211431843     |
| 1399 | NAE1      | ENSG00000159593 | 16:66803118-66805776:-      | 3.68E-08   | 0.147564629   | 0.096772805     |
| 1400 | NAE1      | ENSG00000159593 | 16:66809075-66810373:-      | 0.01780857 | 0.208658378   | 0.165588148     |
| 1401 | NAE1      | ENSG00000159593 | 16:66810413-66810696:-      | 0.00438913 | 0.09721396    | 0.070798109     |
| 1402 | FAM96B    | ENSG00000166595 | 16:66932300-66932779:-      | 0.00054627 | 0.109606679   | 0.083961335     |
| 1403 | CES4A     | ENSG00000172824 | 16:67003553-67004083:+      | 0.01075923 | 0.155206777   | 0.114208468     |
| 1404 | HSF4      | ENSG00000102878 | 16:67164934-67165521:+      | 0.0002869  | 0.682480805   | 0.597618247     |
| 1405 | HSF4      | ENSG00000102878 | 16:67169101-67169278:+      | 5.36E-05   | 0.163007249   | 0.152840092     |
| 1406 | HSF4      | ENSG00000102878 | 16:67169348-67169630:+      | 0.03004507 | 0.25884178    | 0.317741078     |
| 1407 | KIAA0895L | ENSG00000196123 | 16:67180666-67181557:-      | 0.00414227 | 0.093214995   | 0.084969948     |
| 1408 | KIAA0895L | ENSG00000196123 | 16:67181697-67183261:-      | 0.021133   | 0.077944212   | 0.07149837      |
| 1409 | E2F4      | ENSG00000205250 | 16:67197646-67197866:+      | 3.92E-05   | 0.341890549   | 0.26630557      |
| 1410 | ELMO3     | ENSG00000102890 | 16:67203583-67203664:+      | 0.00404241 | 0.089415033   | 0.133516627     |
| 1411 | FHOD1     | ENSG00000135723 | 16:67229718-67229792:-      | 0.00536953 | 0.464285244   | 0.392895065     |
| 1412 | FHOD1     | ENSG00000135723 | 16:67229990-67230065:-      | 0.03591415 | 0.364707007   | 0.317843875     |
| 1413 | SLC9A5    | ENSG00000135740 | 16:67265106-67266087:+      | 6.14E-06   | 0.112428544   | 0.085370344     |
| 1414 | ZDHC1     | ENSG00000159714 | 16:67399456-67400956:-      | 0.0019805  | 0.233597096   | 0.174109181     |
| 1415 | AC027682  | ENSG00000283332 | 16:67546231-67546365:+      | 0.0004707  | 0.094154524   | 0.068492255     |
| 1416 | ACD       | ENSG00000102977 | 16:67657684-67657761:-      | 0.02177068 | 0.130104445   | 0.103906669     |
| 1417 | TSNAXIP1  | ENSG00000102904 | 16:67826844-67826962:+      | 0.00185194 | 0.178694767   | 0.130317651     |
| 1418 | CENPT     | ENSG00000102901 | 16:67828390-67828473:-      | 0.03197601 | 0.10651306    | 0.084260004     |
| 1419 | NUTF2     | ENSG00000102898 | 16:67868599-67870799:+      | 4.64E-05   | 0.117129743   | 0.086461819     |
| 1420 | EDC4      | ENSG00000038358 | 16:67880216-67880556:+      | 5.22E-05   | 0.113140943   | 0.159659838     |
| 1421 | EDC4      | ENSG00000038358 | 16:67881417-67881496:+      | 0.02225638 | 0.347076854   | 0.301282343     |
| 1422 | EDC4      | ENSG00000038358 | 16:67883731-67883955:+      | 0.00495386 | 0.22862943    | 0.176033925     |
| 1423 | PSMB10    | ENSG00000205220 | 16:67934948-67935419:-      | 3.05E-05   | 0.212169927   | 0.161198477     |
| 1424 | PSMB10    | ENSG00000205220 | 16:67935697-67935962:-      | 0.03265838 | 0.184703502   | 0.142745083     |



| S/N  | Gene     | Ensembl ID      | Position of retained intron | p-value    | AD_IR_average | Cont_IR_average |
|------|----------|-----------------|-----------------------------|------------|---------------|-----------------|
| 1425 | COG8     | ENSG00000213380 | 16:69332882-69334520:-      | 0.00298264 | 0.099365063   | 0.076047443     |
| 1426 | NPIPB14P | ENSG00000226232 | 16:69978112-69978221:-      | 0.03462036 | 0.17269635    | 0.147913686     |
| 1427 | FUK      | ENSG00000157353 | 16:70475767-70478271:+      | 0.00138649 | 0.279288371   | 0.336118636     |
| 1428 | COG4     | ENSG00000103051 | 16:70481487-70481763:-      | 1.09E-06   | 0.108667173   | 0.073498682     |
| 1429 | MTSS1L   | ENSG00000132613 | 16:70677899-70678251:-      | 0.0011109  | 0.08598006    | 0.05662465      |
| 1430 | MTSS1L   | ENSG00000132613 | 16:70678409-70679629:-      | 0.02127753 | 0.026945114   | 0.031733538     |
| 1431 | MTSS1L   | ENSG00000132613 | 16:70680055-70680793:-      | 0.02293106 | 0.127291496   | 0.098789078     |
| 1432 | VAC14    | ENSG00000103043 | 16:70698811-70731494:-      | 0.00636498 | 0.104960652   | 0.081055545     |
| 1433 | IST1     | ENSG00000182149 | 16:71922680-71923287:+      | 0.04667387 | 0.092784718   | 0.07374783      |
| 1434 | IST1     | ENSG00000182149 | 16:71923380-71924768:+      | 0.01071667 | 0.347991683   | 0.303511416     |
| 1435 | DHX38    | ENSG00000140829 | 16:72104131-72104485:+      | 0.01856031 | 0.210282961   | 0.262946052     |
| 1436 | GLG1     | ENSG00000090863 | 16:74462630-74463355:-      | 0.02478936 | 0.118895361   | 0.119386339     |
| 1437 | WDR59    | ENSG00000103091 | 16:74909657-74909821:-      | 0.00748581 | 0.577378683   | 0.536153987     |
| 1438 | WDR59    | ENSG00000103091 | 16:74956610-74965772:-      | 0.00056245 | 0.055049126   | 0.080908191     |
| 1439 | ZNRF1    | ENSG00000186187 | 16:75104889-75106481:+      | 0.04125367 | 0.19762318    | 0.172105701     |
| 1440 | ZNRF1    | ENSG00000186187 | 16:75106571-75107732:+      | 0.00156109 | 0.165688488   | 0.128150881     |
| 1441 | LDHD     | ENSG00000166816 | 16:75112713-75112833:-      | 0.00131399 | 0.226232257   | 0.150658447     |
| 1442 | CMC2     | ENSG00000103121 | 16:80997429-81006733:-      | 0.00122277 | 0.04975546    | 0.055766568     |
| 1443 | MPHOSPH  | ENSG00000135698 | 16:82151514-82164081:-      | 0.02323435 | 0.096228265   | 0.081209583     |
| 1444 | MBTPS1   | ENSG00000140943 | 16:84059428-84060681:-      | 0.00136782 | 0.234605857   | 0.184703618     |
| 1445 | MBTPS1   | ENSG00000140943 | 16:84060813-84063304:-      | 0.00563197 | 0.314146817   | 0.257945545     |
| 1446 | MBTPS1   | ENSG00000140943 | 16:84065767-84066488:-      | 0.00714009 | 0.137140479   | 0.098056003     |
| 1447 | MBTPS1   | ENSG00000140943 | 16:84066613-84067666:-      | 0.01954386 | 0.094555495   | 0.068133737     |
| 1448 | COTL1    | ENSG00000103187 | 16:84617583-84617837:-      | 0.00080028 | 0.32630442    | 0.255404377     |
| 1449 | USP10    | ENSG00000103194 | 16:84772685-84775159:+      | 0.00255685 | 0.099682099   | 0.07451754      |
| 1450 | USP10    | ENSG00000103194 | 16:84775225-84778894:+      | 0.00138894 | 0.097325629   | 0.073691999     |
| 1451 | ZCCHC14  | ENSG00000140948 | 16:87414541-87415275:-      | 0.01400632 | 0.129387791   | 0.102102768     |
| 1452 | KLHDC4   | ENSG00000104731 | 16:87708466-87709264:-      | 0.01149499 | 0.128331832   | 0.108480633     |
| 1453 | KLHDC4   | ENSG00000104731 | 16:87709667-87711234:-      | 0.01092557 | 0.248075376   | 0.220285625     |
| 1454 | KLHDC4   | ENSG00000104731 | 16:87726924-87730551:-      | 0.02880237 | 0.093300012   | 0.111052392     |
| 1455 | MVD      | ENSG00000167508 | 16:88653408-88654691:-      | 0.04960219 | 0.123060027   | 0.09968816      |
| 1456 | CTU2     | ENSG00000174177 | 16:88712383-88712621:+      | 0.00054929 | 0.127960407   | 0.094588489     |
| 1457 | CTU2     | ENSG00000174177 | 16:88713447-88713646:+      | 0.03447235 | 0.105517299   | 0.084501142     |
| 1458 | APRT     | ENSG00000198931 | 16:88811656-88811819:-      | 0.00587322 | 0.145357149   | 0.101372668     |
| 1459 | TRAPPC2L | ENSG00000167515 | 16:88857183-88858618:+      | 2.68E-07   | 0.15038957    | 0.093281704     |
| 1460 | ANKRD11  | ENSG00000167522 | 16:89291183-89305205:-      | 0.01018449 | 0.125194372   | 0.153537351     |
| 1461 | SPG7     | ENSG00000197912 | 16:89529579-89530682:+      | 0.00061338 | 0.072877767   | 0.103417383     |
| 1462 | SPG7     | ENSG00000197912 | 16:89530808-89531903:+      | 0.00242913 | 0.265811829   | 0.204338265     |
| 1463 | SPG7     | ENSG00000197912 | 16:89548113-89550493:+      | 0.00640516 | 0.135999629   | 0.109887592     |
| 1464 | CDK10    | ENSG00000185324 | 16:89686797-89690552:+      | 0.0032318  | 0.11883998    | 0.136280951     |
| 1465 | CDK10    | ENSG00000185324 | 16:89693467-89694172:+      | 0.00567481 | 0.705379244   | 0.654544234     |
| 1466 | CDK10    | ENSG00000185324 | 16:89695070-89695292:+      | 0.00020365 | 0.097488982   | 0.069020131     |
| 1467 | VPS9D1   | ENSG00000075399 | 16:89707954-89708426:-      | 1.18E-06   | 0.357384205   | 0.254447962     |
| 1468 | VPS9D1   | ENSG00000075399 | 16:89708956-89709226:-      | 4.77E-05   | 0.251786709   | 0.18275031      |
| 1469 | VPS9D1   | ENSG00000075399 | 16:89711010-89711326:-      | 0.00103689 | 0.273341734   | 0.199709432     |
| 1470 | VPS9D1   | ENSG00000075399 | 16:89711969-89712046:-      | 0.01835386 | 0.07323551    | 0.086328207     |
| 1471 | VPS9D1   | ENSG00000075399 | 16:89712716-89716461:-      | 0.00936367 | 0.086801332   | 0.104100301     |
| 1472 | VPS9D1   | ENSG00000075399 | 16:89716624-89716729:-      | 0.00088219 | 0.078480406   | 0.107364047     |
| 1473 | ZNF276   | ENSG00000158805 | 16:89722834-89723136:+      | 0.02382356 | 0.143848973   | 0.167213517     |
| 1474 | ZNF276   | ENSG00000158805 | 16:89723183-89723259:+      | 0.04741154 | 0.194518363   | 0.215895586     |
| 1475 | ZNF276   | ENSG00000158805 | 16:89729318-89733301:+      | 0.00963089 | 0.179203634   | 0.151685712     |
| 1476 | ZNF276   | ENSG00000158805 | 16:89733412-89733481:+      | 0.00039405 | 0.41447528    | 0.326760987     |
| 1477 | TCF25    | ENSG00000141002 | 16:89895137-89895989:+      | 0.01540481 | 0.10258973    | 0.085177755     |
| 1478 | TCF25    | ENSG00000141002 | 16:89906284-89907242:+      | 0.0157526  | 0.137195276   | 0.114695686     |
| 1479 | DEF8     | ENSG00000140995 | 16:89962125-89963362:+      | 3.17E-09   | 0.536469232   | 0.381286805     |
| 1480 | DEF8     | ENSG00000140995 | 16:89963443-89964169:+      | 5.43E-09   | 0.63857211    | 0.499798286     |
| 1481 | AC133919 | ENSG00000283182 | 16:90037399-90037761:+      | 0.0021058  | 0.130531172   | 0.101526884     |



| S/N  | Gene     | Ensembl ID      | Position of retained intron | p-value    | AD_IR_average | Cont_IR_average |
|------|----------|-----------------|-----------------------------|------------|---------------|-----------------|
| 1482 | ABR      | ENSG00000159842 | 17:1007312-1009678:-        | 0.00706362 | 0.107772109   | 0.092131571     |
| 1483 | ABR      | ENSG00000159842 | 17:1009784-1010728:-        | 1.56E-06   | 0.107422501   | 0.074961018     |
| 1484 | ABR      | ENSG00000159842 | 17:1011985-1012687:-        | 0.00032242 | 0.096158477   | 0.078543379     |
| 1485 | PRPF8    | ENSG00000174231 | 17:1659548-1659840:-        | 0.04956332 | 0.097964384   | 0.142078631     |
| 1486 | DPH1     | ENSG00000108963 | 17:2036091-2036528:+        | 0.00059041 | 0.369800939   | 0.302747613     |
| 1487 | DPH1     | ENSG00000108963 | 17:2036956-2039754:+        | 0.0128361  | 0.586902817   | 0.535162104     |
| 1488 | DPH1     | ENSG00000108963 | 17:2039823-2040217:+        | 0.00186837 | 0.212277021   | 0.171587782     |
| 1489 | SGSM2    | ENSG00000141258 | 17:2364183-2364595:+        | 0.0068428  | 0.17185484    | 0.134103631     |
| 1490 | SGSM2    | ENSG00000141258 | 17:2364663-2364896:+        | 0.00014379 | 0.116211434   | 0.073092593     |
| 1491 | SGSM2    | ENSG00000141258 | 17:2372488-2372952:+        | 0.04673007 | 0.39677561    | 0.355258682     |
| 1492 | SGSM2    | ENSG00000141258 | 17:2373513-2375491:+        | 8.96E-05   | 0.368048768   | 0.297107944     |
| 1493 | SGSM2    | ENSG00000141258 | 17:2375875-2376136:+        | 0.00052142 | 0.130218172   | 0.0971078       |
| 1494 | SGSM2    | ENSG00000141258 | 17:2376261-2376732:+        | 0.00047977 | 0.132844278   | 0.096893194     |
| 1495 | RAP1GAP2 | ENSG00000132359 | 17:3026121-3026349:+        | 0.01411377 | 0.205424316   | 0.176301836     |
| 1496 | CAMKK1   | ENSG00000004660 | 17:3862283-3865907:-        | 0.00383858 | 0.16212577    | 0.209257665     |
| 1497 | PELP1    | ENSG00000141456 | 17:4675884-4676035:-        | 0.00076348 | 0.131591507   | 0.101974553     |
| 1498 | PELP1    | ENSG00000141456 | 17:4676812-4682501:-        | 0.0138204  | 0.08785062    | 0.113028736     |
| 1499 | ARRB2    | ENSG00000141480 | 17:4710744-4715012:+        | 0.00354255 | 0.142486935   | 0.134525497     |
| 1500 | ARRB2    | ENSG00000141480 | 17:4716033-4716146:+        | 0.02277908 | 0.24779404    | 0.2227488       |
| 1501 | ARRB2    | ENSG00000141480 | 17:4716191-4716411:+        | 0.04464494 | 0.279923013   | 0.260565186     |
| 1502 | ARRB2    | ENSG00000141480 | 17:4716608-4717216:+        | 5.41E-05   | 0.318482976   | 0.238698166     |
| 1503 | ARRB2    | ENSG00000141480 | 17:4718023-4718260:+        | 2.01E-05   | 0.347076671   | 0.321586065     |
| 1504 | ARRB2    | ENSG00000141480 | 17:4718345-4718611:+        | 2.13E-06   | 0.335967598   | 0.307229935     |
| 1505 | ARRB2    | ENSG00000141480 | 17:4720299-4720392:+        | 0.00684555 | 0.13234012    | 0.107240377     |
| 1506 | ARRB2    | ENSG00000141480 | 17:4720640-4720945:+        | 0.00226914 | 0.333836634   | 0.285581338     |
| 1507 | PLD2     | ENSG00000129219 | 17:4817055-4817145:+        | 0.00429503 | 0.32331522    | 0.274133682     |
| 1508 | PLD2     | ENSG00000129219 | 17:4818106-4818296:+        | 5.72E-06   | 0.646219183   | 0.562718403     |
| 1509 | PLD2     | ENSG00000129219 | 17:4818385-4818493:+        | 4.46E-05   | 0.38352372    | 0.327938097     |
| 1510 | PLD2     | ENSG00000129219 | 17:4819218-4819428:+        | 0.00284181 | 0.094012779   | 0.114615691     |
| 1511 | MINK1    | ENSG00000141503 | 17:4894311-4894524:+        | 0.02796884 | 0.223143702   | 0.189876786     |
| 1512 | MINK1    | ENSG00000141503 | 17:4894633-4895074:+        | 0.00848405 | 0.13477716    | 0.110577794     |
| 1513 | MINK1    | ENSG00000141503 | 17:4895832-4896002:+        | 0.02025228 | 0.158454709   | 0.134441399     |
| 1514 | RNF167   | ENSG00000108523 | 17:4942664-4942850:+        | 0.0007385  | 0.092604371   | 0.072682578     |
| 1515 | SPAG7    | ENSG00000091640 | 17:4959643-4959759:-        | 0.00060797 | 0.156849      | 0.124050575     |
| 1516 | NUP88    | ENSG00000108559 | 17:5386269-5386707:-        | 2.57E-05   | 0.120752772   | 0.088500642     |
| 1517 | C17orf49 | ENSG00000258315 | 17:7015156-7015773:+        | 0.04263456 | 0.162300326   | 0.160453164     |
| 1518 | C17orf49 | ENSG00000258315 | 17:7016685-7016909:+        | 0.0106175  | 0.124751456   | 0.108087532     |
| 1519 | DLG4     | ENSG00000132535 | 17:7204252-7204945:-        | 0.04683713 | 0.082781522   | 0.063646278     |
| 1520 | ACADVL   | ENSG00000072778 | 17:7220046-7220121:+        | 5.17E-05   | 0.287693476   | 0.221218474     |
| 1521 | ACADVL   | ENSG00000072778 | 17:7220529-7220603:+        | 0.00453279 | 0.133901393   | 0.104915561     |
| 1522 | ACADVL   | ENSG00000072778 | 17:7222081-7222176:+        | 0.01572415 | 0.701843512   | 0.662446169     |
| 1523 | ACADVL   | ENSG00000072778 | 17:7222302-7222666:+        | 0.02546891 | 0.539642561   | 0.496317013     |
| 1524 | ACADVL   | ENSG00000072778 | 17:7223875-7223967:+        | 5.73E-05   | 0.110503866   | 0.083982984     |
| 1525 | ACADVL   | ENSG00000072778 | 17:7224069-7224145:+        | 1.98E-05   | 0.112003677   | 0.080064216     |
| 1526 | ACADVL   | ENSG00000072778 | 17:7224243-7224320:+        | 6.72E-05   | 0.091668733   | 0.065621747     |
| 1527 | DVL2     | ENSG00000004975 | 17:7226639-7227089:-        | 2.87E-07   | 0.252612888   | 0.33332444      |
| 1528 | DVL2     | ENSG00000004975 | 17:7228044-7228968:-        | 0.0129271  | 0.141856129   | 0.11835684      |
| 1529 | DVL2     | ENSG00000004975 | 17:7229274-7229377:-        | 0.00025135 | 0.35821589    | 0.288682653     |
| 1530 | DVL2     | ENSG00000004975 | 17:7229447-7229587:-        | 1.77E-06   | 0.545981305   | 0.444963987     |
| 1531 | DVL2     | ENSG00000004975 | 17:7229678-7229807:-        | 6.49E-05   | 0.395173427   | 0.302192779     |
| 1532 | EIF5A    | ENSG00000132507 | 17:7309800-7311017:+        | 0.01486473 | 0.141593426   | 0.126515961     |
| 1533 | GPS2     | ENSG00000132522 | 17:7313291-7313379:-        | 0.00034543 | 0.199570885   | 0.15387004      |
| 1534 | GPS2     | ENSG00000132522 | 17:7313469-7313567:-        | 1.66E-07   | 0.120349118   | 0.080076829     |
| 1535 | NEURL4   | ENSG00000215041 | 17:7318172-7318268:-        | 0.00570775 | 0.201859467   | 0.236526156     |
| 1536 | NEURL4   | ENSG00000215041 | 17:7318356-7318494:-        | 0.00019827 | 0.126629355   | 0.162441756     |
| 1537 | NEURL4   | ENSG00000215041 | 17:7323123-7323484:-        | 0.00463294 | 0.309189732   | 0.273178652     |
| 1538 | NLGN2    | ENSG00000169992 | 17:7415148-7415510:+        | 2.32E-05   | 0.11104463    | 0.07507107      |

| S/N  | Gene      | Ensembl ID      | Position of retained intron | p-value    | AD_IR_average | Cont_IR_average |
|------|-----------|-----------------|-----------------------------|------------|---------------|-----------------|
| 1539 | TNFSF13   | ENSG00000161955 | 17:7559297-7559623:+        | 0.00637324 | 0.1823589     | 0.143923248     |
| 1540 | TNFSF12-T | ENSG00000248871 | 17:7559702-7559845:+        | 0.00119639 | 0.251562233   | 0.19895699      |
| 1541 | TNFSF12-T | ENSG00000248871 | 17:7559893-7560048:+        | 0.02825539 | 0.096629465   | 0.079839813     |
| 1542 | TNFSF12-T | ENSG00000248871 | 17:7560167-7560349:+        | 0.00613382 | 0.111469684   | 0.092159284     |
| 1543 | CD68      | ENSG00000129226 | 17:7580585-7580710:+        | 0.04100295 | 0.443670689   | 0.366267131     |
| 1544 | CD68      | ENSG00000129226 | 17:7580783-7580895:+        | 0.00616917 | 0.547750716   | 0.45805153      |
| 1545 | CD68      | ENSG00000129226 | 17:7581066-7581377:+        | 0.00109398 | 0.464156754   | 0.359427592     |
| 1546 | SAT2      | ENSG00000141504 | 17:7627044-7627142:-        | 0.03540422 | 0.130979343   | 0.147611735     |
| 1547 | WRAP53    | ENSG00000141499 | 17:7702846-7702992:+        | 0.001783   | 0.167631121   | 0.126902104     |
| 1548 | KDM6B     | ENSG00000132510 | 17:7853380-7853497:+        | 0.00455738 | 0.512482512   | 0.431940571     |
| 1549 | NAA38     | ENSG00000183011 | 17:7856843-7856984:-        | 0.00413945 | 0.033835228   | 0.028402433     |
| 1550 | CNTROB    | ENSG00000170037 | 17:7944248-7944475:+        | 0.03833696 | 0.444085183   | 0.401688844     |
| 1551 | CNTROB    | ENSG00000170037 | 17:7947722-7947915:+        | 0.00328195 | 0.113412522   | 0.089414281     |
| 1552 | CTC1      | ENSG00000178971 | 17:8229446-8229890:-        | 0.01869574 | 0.198999889   | 0.237406718     |
| 1553 | CTC1      | ENSG00000178971 | 17:8234655-8234748:-        | 0.01201855 | 0.09781258    | 0.114452273     |
| 1554 | RANGRF    | ENSG00000108961 | 17:8289588-8289812:+        | 5.31E-07   | 0.580482866   | 0.543203156     |
| 1555 | ARHGAP44  | ENSG00000006740 | 17:12980233-12984530:+      | 0.03970681 | 0.116880823   | 0.101507051     |
| 1556 | ELAC2     | ENSG00000006744 | 17:12995978-12996546:-      | 0.00065562 | 0.06629605    | 0.094441177     |
| 1557 | TTC19     | ENSG0000011295  | 17:16025171-16026539:+      | 0.00024788 | 0.184059445   | 0.137375482     |
| 1558 | MPRIIP    | ENSG00000133030 | 17:17180088-17180606:+      | 0.0330696  | 0.098061382   | 0.091421846     |
| 1559 | FLCN      | ENSG00000154803 | 17:17215316-17216379:-      | 0.04076064 | 0.176361735   | 0.181414984     |
| 1560 | FLCN      | ENSG00000154803 | 17:17219209-17221536:-      | 8.15E-08   | 0.706140561   | 0.608018506     |
| 1561 | FLCN      | ENSG00000154803 | 17:17224143-17226175:-      | 2.44E-05   | 0.209609515   | 0.283079987     |
| 1562 | FLCN      | ENSG00000154803 | 17:17228161-17231793:-      | 9.79E-05   | 0.291685079   | 0.397590273     |
| 1563 | RAI1      | ENSG00000108557 | 17:17803849-17809389:+      | 2.86E-06   | 0.323256795   | 0.253396481     |
| 1564 | RAI1      | ENSG00000108557 | 17:17809439-17809969:+      | 0.00050959 | 0.158127213   | 0.121735197     |
| 1565 | TOM1L2    | ENSG00000175662 | 17:17848859-17850892:-      | 6.85E-05   | 0.139639813   | 0.112264968     |
| 1566 | ATPAF2    | ENSG00000171953 | 17:18024704-18026318:-      | 2.49E-08   | 0.179577249   | 0.119469229     |
| 1567 | DRG2      | ENSG00000108591 | 17:18093973-18098269:+      | 0.00694951 | 0.134050515   | 0.111314809     |
| 1568 | DRG2      | ENSG00000108591 | 17:18099077-18099632:+      | 3.81E-07   | 0.238838301   | 0.185193618     |
| 1569 | LLGL1     | ENSG00000131899 | 17:18234175-18234272:+      | 0.04237533 | 0.11736554    | 0.098039857     |
| 1570 | LLGL1     | ENSG00000131899 | 17:18236939-18237480:+      | 0.04826501 | 0.309814988   | 0.291357714     |
| 1571 | LLGL1     | ENSG00000131899 | 17:18240873-18241450:+      | 6.83E-07   | 0.503734598   | 0.397713091     |
| 1572 | LLGL1     | ENSG00000131899 | 17:18241715-18241884:+      | 1.20E-09   | 0.379447183   | 0.256696377     |
| 1573 | FLII      | ENSG00000177731 | 17:18245419-18245554:-      | 0.00942131 | 0.108963771   | 0.08992804      |
| 1574 | FLII      | ENSG00000177731 | 17:18245660-18245743:-      | 0.00010295 | 0.197810294   | 0.24004906      |
| 1575 | FLII      | ENSG00000177731 | 17:18245850-18245933:-      | 0.00014871 | 0.229819667   | 0.280527312     |
| 1576 | FLII      | ENSG00000177731 | 17:18256597-18256908:-      | 0.00312815 | 0.243489884   | 0.194694081     |
| 1577 | SHMT1     | ENSG00000176974 | 17:18330671-18333165:-      | 0.03696102 | 0.202559183   | 0.183494521     |
| 1578 | EPN2      | ENSG00000072134 | 17:19329647-19331852:+      | 0.0081347  | 0.131398001   | 0.112065753     |
| 1579 | MAPK7     | ENSG00000166484 | 17:19381686-19381780:+      | 0.04898696 | 0.189510204   | 0.214623564     |
| 1580 | MAP2K3    | ENSG00000034152 | 17:21305128-21312141:+      | 0.01527193 | 0.177588895   | 0.146223871     |
| 1581 | WSB1      | ENSG00000109046 | 17:27309272-27310060:+      | 7.74E-06   | 0.12282451    | 0.085498584     |
| 1582 | WSB1      | ENSG00000109046 | 17:27310174-27311508:+      | 2.56E-05   | 0.161251791   | 0.119908652     |
| 1583 | LGALS9    | ENSG00000168961 | 17:27647432-27648835:+      | 0.02841291 | 0.118038868   | 0.085675125     |
| 1584 | IFT20     | ENSG00000109083 | 17:28330528-28331858:-      | 0.00235351 | 0.138284682   | 0.106534997     |
| 1585 | VTN       | ENSG00000109072 | 17:28368673-28368871:-      | 0.00010551 | 0.264910912   | 0.183547508     |
| 1586 | UNC119    | ENSG00000109103 | 17:28548101-28548591:-      | 5.62E-07   | 0.241120591   | 0.162300539     |
| 1587 | PIGS      | ENSG00000087111 | 17:28556972-28558475:-      | 0.00074163 | 0.148631521   | 0.116759383     |
| 1588 | SGK494    | ENSG00000167524 | 17:28610699-28611142:-      | 0.00182417 | 0.678466195   | 0.612107117     |
| 1589 | SGK494    | ENSG00000167524 | 17:28612084-28612261:-      | 0.00027306 | 0.379628976   | 0.274690104     |
| 1590 | PHF12     | ENSG00000109118 | 17:28906994-28907589:-      | 0.03899624 | 0.183012788   | 0.163487284     |
| 1591 | PHF12     | ENSG00000109118 | 17:28907672-28908782:-      | 0.00329328 | 0.171457901   | 0.140455717     |
| 1592 | MYO18A    | ENSG00000196535 | 17:29092456-29092854:-      | 0.02559999 | 0.181379787   | 0.151530567     |
| 1593 | MYO18A    | ENSG00000196535 | 17:29094090-29094649:-      | 6.35E-06   | 0.15139653    | 0.09363457      |
| 1594 | MYO18A    | ENSG00000196535 | 17:29116455-29118044:-      | 0.01495681 | 0.131616522   | 0.177822742     |
| 1595 | GIT1      | ENSG00000108262 | 17:29576674-29576862:-      | 0.00402157 | 0.096661482   | 0.080574121     |

| S/N  | Gene     | Ensembl ID      | Position of retained intron | p-value    | AD_IR_average | Cont_IR_average |
|------|----------|-----------------|-----------------------------|------------|---------------|-----------------|
| 1596 | ANKRD13B | ENSG00000198720 | 17:29608110-29608194:+      | 0.03426741 | 0.188990329   | 0.209702896     |
| 1597 | ANKRD13B | ENSG00000198720 | 17:29608240-29608850:+      | 0.0015919  | 0.196896824   | 0.23459251      |
| 1598 | ANKRD13B | ENSG00000198720 | 17:29609421-29610684:+      | 0.04133512 | 0.164630298   | 0.146060848     |
| 1599 | ANKRD13B | ENSG00000198720 | 17:29610766-29611578:+      | 0.00064338 | 0.225161146   | 0.176333047     |
| 1600 | ANKRD13B | ENSG00000198720 | 17:29611643-29611875:+      | 7.31E-05   | 0.272240805   | 0.208985996     |
| 1601 | SUZ12P1  | ENSG00000264538 | 17:30768867-30769000:+      | 0.00214152 | 0.924830524   | 0.908822506     |
| 1602 | RHOT1    | ENSG00000126858 | 17:32211238-32224615:+      | 0.00313594 | 0.03777987    | 0.032592327     |
| 1603 | C17orf75 | ENSG00000108666 | 17:32331978-32333416:-      | 0.00027278 | 0.115492599   | 0.084782029     |
| 1604 | C17orf75 | ENSG00000108666 | 17:32333520-32334468:-      | 0.00045264 | 0.107665282   | 0.083203        |
| 1605 | PSMD11   | ENSG00000108671 | 17:32474824-32477520:+      | 0.03170213 | 0.112466129   | 0.09246151      |
| 1606 | PSMD11   | ENSG00000108671 | 17:32477583-32479250:+      | 0.00017696 | 0.103318678   | 0.068365653     |
| 1607 | PSMD11   | ENSG00000108671 | 17:32479376-32479850:+      | 0.00048228 | 0.108751656   | 0.083530871     |
| 1608 | PSMD11   | ENSG00000108671 | 17:32479886-32480145:+      | 0.00404163 | 0.106240895   | 0.090155471     |
| 1609 | DDX52    | ENSG00000278053 | 17:37619839-37620872:-      | 0.01799265 | 0.08583479    | 0.06444063      |
| 1610 | DDX52    | ENSG00000278053 | 17:37620948-37621126:-      | 0.00331514 | 0.135060315   | 0.104711258     |
| 1611 | ARHGAP23 | ENSG00000275832 | 17:38498510-38498931:+      | 0.00209064 | 0.122946967   | 0.103021279     |
| 1612 | ARHGAP23 | ENSG00000275832 | 17:38498954-38500596:+      | 0.00089892 | 0.184511096   | 0.156777529     |
| 1613 | SRCIN1   | ENSG00000277363 | 17:38547881-38548556:-      | 0.00992106 | 0.147258812   | 0.132101506     |
| 1614 | SRCIN1   | ENSG00000277363 | 17:38560097-38560332:-      | 0.04059067 | 0.080067058   | 0.099331647     |
| 1615 | SRCIN1   | ENSG00000277363 | 17:38560425-38561462:-      | 0.04121077 | 0.088265193   | 0.110798753     |
| 1616 | SRCIN1   | ENSG00000277363 | 17:38562328-38562826:-      | 0.00147556 | 0.082549124   | 0.117080778     |
| 1617 | SRCIN1   | ENSG00000277363 | 17:38564313-38568210:-      | 0.00077552 | 0.073456951   | 0.100964006     |
| 1618 | MLLT6    | ENSG00000275023 | 17:38722227-38722677:+      | 0.02163541 | 0.193663755   | 0.163021413     |
| 1619 | CISD3    | ENSG00000277972 | 17:38730406-38730759:+      | 0.01249149 | 0.182788364   | 0.141770086     |
| 1620 | PCGF2    | ENSG00000277258 | 17:38735600-38736089:-      | 0.00596299 | 0.135543587   | 0.110744747     |
| 1621 | STARD3   | ENSG00000131748 | 17:39658026-39658404:+      | 0.00702063 | 0.457912      | 0.413957506     |
| 1622 | STARD3   | ENSG00000131748 | 17:39661085-39662250:+      | 0.01094607 | 0.100278756   | 0.079992345     |
| 1623 | STARD3   | ENSG00000131748 | 17:39662344-39662803:+      | 0.00659941 | 0.11355027    | 0.08775646      |
| 1624 | GSDMB    | ENSG00000073605 | 17:39905985-39906110:-      | 4.29E-06   | 0.09136752    | 0.064491712     |
| 1625 | GSDMB    | ENSG00000073605 | 17:39909042-39909755:-      | 8.35E-05   | 0.289183585   | 0.250353158     |
| 1626 | GSDMB    | ENSG00000073605 | 17:39909924-39912325:-      | 0.00446212 | 0.111042834   | 0.090568262     |
| 1627 | PSMD3    | ENSG00000108344 | 17:39995527-39996182:+      | 0.00651871 | 0.12215083    | 0.105178869     |
| 1628 | MED24    | ENSG00000008838 | 17:40027034-40027382:-      | 0.00545337 | 0.277500354   | 0.233452003     |
| 1629 | MED24    | ENSG00000008838 | 17:40027465-40027908:-      | 0.00089087 | 0.361039244   | 0.283991639     |
| 1630 | MED24    | ENSG00000008838 | 17:40027946-40028825:-      | 0.00085973 | 0.362427507   | 0.278469814     |
| 1631 | NR1D1    | ENSG00000126368 | 17:40094122-40094934:-      | 0.01121884 | 0.102043844   | 0.088115708     |
| 1632 | NR1D1    | ENSG00000126368 | 17:40096587-40096690:-      | 0.0120054  | 0.106350961   | 0.087025296     |
| 1633 | CASC3    | ENSG00000108349 | 17:40166861-40167497:+      | 0.0202741  | 0.09518726    | 0.116620488     |
| 1634 | RAPGEFL1 | ENSG00000108352 | 17:40184349-40184580:+      | 5.30E-05   | 0.189446041   | 0.137898557     |
| 1635 | RARA     | ENSG00000131759 | 17:40352507-40354301:+      | 0.01985239 | 0.095383199   | 0.074630601     |
| 1636 | DNAJC7   | ENSG00000168259 | 17:41976770-41977260:-      | 0.04345755 | 0.213016027   | 0.227442351     |
| 1637 | KAT2A    | ENSG00000108773 | 17:42114282-42114357:-      | 0.00689388 | 0.11685963    | 0.094655829     |
| 1638 | KAT2A    | ENSG00000108773 | 17:42114604-42114891:-      | 0.00557529 | 0.119912485   | 0.097826964     |
| 1639 | KAT2A    | ENSG00000108773 | 17:42115035-42115722:-      | 0.00017793 | 0.133351996   | 0.100080888     |
| 1640 | GHDC     | ENSG00000167925 | 17:42189921-42190184:-      | 2.21E-06   | 0.4634205     | 0.342463468     |
| 1641 | GHDC     | ENSG00000167925 | 17:42190270-42190623:-      | 6.91E-08   | 0.468089659   | 0.34421787      |
| 1642 | GHDC     | ENSG00000167925 | 17:42190757-42190831:-      | 0.00017231 | 0.46632961    | 0.380169338     |
| 1643 | COASY    | ENSG00000068120 | 17:42564175-42564445:+      | 0.03024818 | 0.126195404   | 0.159463395     |
| 1644 | COASY    | ENSG00000068120 | 17:42564577-42564708:+      | 0.00218037 | 0.084878471   | 0.11028203      |
| 1645 | COASY    | ENSG00000068120 | 17:42564898-42564982:+      | 0.00093353 | 0.093934311   | 0.115301425     |
| 1646 | PSMC3IP  | ENSG00000131470 | 17:42573024-42573106:-      | 0.01422656 | 0.35821872    | 0.403558169     |
| 1647 | PSMC3IP  | ENSG00000131470 | 17:42573364-42573477:-      | 0.00501813 | 0.195716351   | 0.143251144     |
| 1648 | TUBG2    | ENSG00000037042 | 17:42659552-42659833:+      | 2.19E-05   | 0.331524123   | 0.253196673     |
| 1649 | TUBG2    | ENSG00000037042 | 17:42660316-42660638:+      | 0.00456971 | 0.094896782   | 0.079289777     |
| 1650 | TUBG2    | ENSG00000037042 | 17:42660707-42662972:+      | 1.39E-05   | 0.463762159   | 0.383973468     |
| 1651 | TUBG2    | ENSG00000037042 | 17:42663052-42663376:+      | 1.65E-05   | 0.329913451   | 0.262238182     |
| 1652 | TUBG2    | ENSG00000037042 | 17:42665562-42665677:+      | 0.0002067  | 0.48751978    | 0.403465065     |

| S/N  | Gene      | Ensembl ID      | Position of retained intron | p-value    | AD_IR_average | Cont_IR_average |
|------|-----------|-----------------|-----------------------------|------------|---------------|-----------------|
| 1653 | PLEKHH3   | ENSG00000068137 | 17:42670705-42670993:-      | 0.00203407 | 0.143821905   | 0.096030979     |
| 1654 | CNTNAP1   | ENSG00000108797 | 17:42697799-42697902:+      | 0.01142476 | 0.124364516   | 0.104486539     |
| 1655 | CNTNAP1   | ENSG00000108797 | 17:42697950-42698617:+      | 0.03027809 | 0.110455823   | 0.097765718     |
| 1656 | EZH1      | ENSG00000108799 | 17:42702961-42703739:-      | 2.31E-05   | 0.697420598   | 0.614659377     |
| 1657 | EZH1      | ENSG00000108799 | 17:42718067-42718453:-      | 0.00339328 | 0.082331588   | 0.138330349     |
| 1658 | AARSD1    | ENSG00000266967 | 17:42955224-42955841:-      | 0.00063808 | 0.156065783   | 0.119636053     |
| 1659 | AARSD1    | ENSG00000266967 | 17:42955972-42956203:-      | 0.00526907 | 0.160075539   | 0.132752906     |
| 1660 | MPP3      | ENSG00000161647 | 17:43801877-43808955:-      | 0.00011099 | 0.100364944   | 0.074837014     |
| 1661 | MPP3      | ENSG00000161647 | 17:43810915-43811111:-      | 1.35E-07   | 0.117420122   | 0.067691886     |
| 1662 | MPP3      | ENSG00000161647 | 17:43811205-43814010:-      | 0.02809999 | 0.310209251   | 0.268905429     |
| 1663 | HDAC5     | ENSG00000108840 | 17:44079277-44080106:-      | 3.39E-05   | 0.118580704   | 0.091390264     |
| 1664 | HDAC5     | ENSG00000108840 | 17:44091831-44092171:-      | 0.00014949 | 0.145837741   | 0.108678603     |
| 1665 | HDAC5     | ENSG00000108840 | 17:44092284-44092380:-      | 0.03740943 | 0.145370539   | 0.119698164     |
| 1666 | RUNDC3A   | ENSG00000108309 | 17:44315009-44315154:+      | 0.04707258 | 0.14124373    | 0.122069319     |
| 1667 | RUNDC3A   | ENSG00000108309 | 17:44316522-44316618:+      | 2.78E-05   | 0.159527645   | 0.117787608     |
| 1668 | SLC25A39  | ENSG00000013306 | 17:44320276-44320354:-      | 0.02570626 | 0.096350615   | 0.078122721     |
| 1669 | SLC25A39  | ENSG00000013306 | 17:44320731-44321057:-      | 0.00607409 | 0.362238073   | 0.313121299     |
| 1670 | SLC25A39  | ENSG00000013306 | 17:44322528-44322807:-      | 0.00037227 | 0.14600813    | 0.112711288     |
| 1671 | SLC25A39  | ENSG00000013306 | 17:44322852-44323283:-      | 1.89E-06   | 0.097247948   | 0.067658164     |
| 1672 | ADAM11    | ENSG00000073670 | 17:44775311-44775393:+      | 0.03824917 | 0.106797126   | 0.085580595     |
| 1673 | ADAM11    | ENSG00000073670 | 17:44777863-44777951:+      | 0.00660291 | 0.271721768   | 0.225272929     |
| 1674 | NMT1      | ENSG00000136448 | 17:45103876-45104858:+      | 0.03919125 | 0.20032398    | 0.187135432     |
| 1675 | FMNL1     | ENSG00000184922 | 17:45241230-45241381:+      | 0.02538519 | 0.628644366   | 0.585858182     |
| 1676 | FMNL1     | ENSG00000184922 | 17:45244025-45244175:+      | 1.33E-07   | 0.357709154   | 0.233092221     |
| 1677 | FMNL1     | ENSG00000184922 | 17:45245973-45246209:+      | 0.00092461 | 0.197906073   | 0.153259008     |
| 1678 | KANSL1    | ENSG00000120071 | 17:46033192-46033402:-      | 0.00831246 | 0.190621582   | 0.153650631     |
| 1679 | NPEPPS    | ENSG00000141279 | 17:47619164-47619736:+      | 0.00742206 | 0.100138533   | 0.132597262     |
| 1680 | TBKBP1    | ENSG00000198933 | 17:47709452-47710497:+      | 3.82E-05   | 0.151617274   | 0.095027052     |
| 1681 | SCRN2     | ENSG00000141295 | 17:47838450-47838530:-      | 0.02131723 | 0.209387862   | 0.173269727     |
| 1682 | SCRN2     | ENSG00000141295 | 17:47839006-47839443:-      | 0.02535162 | 0.136281513   | 0.113727675     |
| 1683 | SCRN2     | ENSG00000141295 | 17:47840372-47840669:-      | 0.00068514 | 0.130266518   | 0.098177483     |
| 1684 | SNF8      | ENSG00000159210 | 17:48930612-48931642:-      | 1.81E-11   | 0.366864378   | 0.261569086     |
| 1685 | ITGA3     | ENSG00000005884 | 17:50075526-50075598:+      | 1.39E-05   | 0.360227854   | 0.248047099     |
| 1686 | ITGA3     | ENSG00000005884 | 17:50077447-50078045:+      | 0.04235948 | 0.086334715   | 0.064396647     |
| 1687 | ITGA3     | ENSG00000005884 | 17:50087869-50088224:+      | 0.01980884 | 0.064266853   | 0.065738055     |
| 1688 | ITGA3     | ENSG00000005884 | 17:50088366-50089109:+      | 0.00113948 | 0.090368402   | 0.088053716     |
| 1689 | PKD2      | ENSG00000005882 | 17:50109400-50109956:+      | 0.01958461 | 0.123507967   | 0.089227008     |
| 1690 | SAMD14    | ENSG00000167100 | 17:50113048-50113923:-      | 0.01608933 | 0.204654976   | 0.171271204     |
| 1691 | SAMD14    | ENSG00000167100 | 17:50114079-50114186:-      | 0.03224752 | 0.106372717   | 0.08541207      |
| 1692 | SAMD14    | ENSG00000167100 | 17:50114306-50115563:-      | 0.00515561 | 0.121093609   | 0.093498748     |
| 1693 | SAMD14    | ENSG00000167100 | 17:50116090-50117406:-      | 4.05E-05   | 0.25028054    | 0.180349395     |
| 1694 | SAMD14    | ENSG00000167100 | 17:50117695-50118160:-      | 0.00015445 | 0.204217716   | 0.143808078     |
| 1695 | RSAD1     | ENSG00000136444 | 17:50482456-50482642:+      | 0.00046792 | 0.301718256   | 0.385654143     |
| 1696 | RSAD1     | ENSG00000136444 | 17:50482706-50483339:+      | 2.08E-08   | 0.196896037   | 0.299532106     |
| 1697 | RSAD1     | ENSG00000136444 | 17:50483487-50483705:+      | 0.00044453 | 0.326170659   | 0.395840636     |
| 1698 | SPATA20   | ENSG00000006282 | 17:50551190-50551510:+      | 1.67E-07   | 0.472729634   | 0.337059312     |
| 1699 | SPATA20   | ENSG00000006282 | 17:50551679-50551968:+      | 1.96E-07   | 0.530069732   | 0.394156026     |
| 1700 | UTP18     | ENSG00000011260 | 17:51297003-51297781:+      | 0.00055702 | 0.114895466   | 0.084032656     |
| 1701 | TOM11L    | ENSG00000141198 | 17:54949623-54950044:+      | 2.37E-11   | 0.463337354   | 0.294629039     |
| 1702 | TOM11L    | ENSG00000141198 | 17:54950126-54960565:+      | 0.00212489 | 0.702415268   | 0.640816506     |
| 1703 | SCPEP1    | ENSG00000121064 | 17:56995635-56996961:+      | 0.00729496 | 0.14993559    | 0.2001966       |
| 1704 | MSI2      | ENSG00000153944 | 17:57675126-57676986:+      | 0.024972   | 0.089062694   | 0.064506242     |
| 1705 | RP11-159D | ENSG00000266086 | 17:57989269-57989648:-      | 1.96E-05   | 0.45887439    | 0.361421156     |
| 1706 | SRSF1     | ENSG00000136450 | 17:58005600-58005800:-      | 0.033917   | 0.364034902   | 0.408129273     |
| 1707 | TSPOAP1   | ENSG00000005379 | 17:58305171-58305386:-      | 0.00022397 | 0.265063602   | 0.203002713     |
| 1708 | TSPOAP1   | ENSG00000005379 | 17:58305865-58306341:-      | 0.00530314 | 0.119967045   | 0.107918961     |
| 1709 | TSPOAP1   | ENSG00000005379 | 17:58309380-58309966:-      | 0.01398654 | 0.148065435   | 0.176639839     |



| S/N  | Gene     | Ensembl ID      | Position of retained intron | p-value    | AD_IR_average | Cont_IR_average |
|------|----------|-----------------|-----------------------------|------------|---------------|-----------------|
| 1710 | TSPOAP1  | ENSG00000005379 | 17:58326790-58327587:-      | 0.04462781 | 0.083145072   | 0.108192045     |
| 1711 | CLTC     | ENSG00000141367 | 17:59687021-59690635:+      | 0.01230671 | 0.024304187   | 0.024607811     |
| 1712 | CA4      | ENSG00000167434 | 17:60150092-60155313:+      | 0.00335076 | 0.206370502   | 0.170784147     |
| 1713 | CA4      | ENSG00000167434 | 17:60155367-60156559:+      | 0.00520616 | 0.168515472   | 0.136442643     |
| 1714 | CA4      | ENSG00000167434 | 17:60156715-60157426:+      | 4.36E-07   | 0.530724941   | 0.379877439     |
| 1715 | MAP3K3   | ENSG00000198909 | 17:63689735-63690263:+      | 0.00049124 | 0.332992515   | 0.263102078     |
| 1716 | FTSJ3    | ENSG00000108592 | 17:63822168-63823816:-      | 0.00077428 | 0.099621422   | 0.135097266     |
| 1717 | SMARCD2  | ENSG00000108604 | 17:63832991-63833068:-      | 4.28E-05   | 0.367646806   | 0.277618208     |
| 1718 | SMARCD2  | ENSG00000108604 | 17:63833170-63833297:-      | 0.01225493 | 0.101697285   | 0.081077262     |
| 1719 | SMARCD2  | ENSG00000108604 | 17:63835567-63836921:-      | 0.03281186 | 0.205530232   | 0.174439252     |
| 1720 | POLG2    | ENSG00000256525 | 17:64485868-64490795:-      | 0.03741635 | 0.126176354   | 0.138214613     |
| 1721 | DDX5     | ENSG00000108654 | 17:64500326-64500548:-      | 0.00040994 | 0.186074076   | 0.237755336     |
| 1722 | CEP95    | ENSG00000258890 | 17:64525882-64526070:+      | 0.03073549 | 0.134233332   | 0.10475669      |
| 1723 | CEP95    | ENSG00000258890 | 17:64527264-64529287:+      | 2.82E-06   | 0.24206986    | 0.162656305     |
| 1724 | CEP95    | ENSG00000258890 | 17:64529427-64530925:+      | 4.54E-07   | 0.32778031    | 0.214711755     |
| 1725 | CEP95    | ENSG00000258890 | 17:64531018-64531889:+      | 2.70E-05   | 0.522891378   | 0.417012532     |
| 1726 | CEP95    | ENSG00000258890 | 17:64537112-64537602:+      | 0.02501664 | 0.243289249   | 0.207750571     |
| 1727 | PLEKHM1P | ENSG00000214176 | 17:64822393-64824624:-      | 0.01873489 | 0.074497662   | 0.06136488      |
| 1728 | WIPI1    | ENSG00000070540 | 17:68426175-68427134:-      | 0.00744748 | 0.107503852   | 0.139009644     |
| 1729 | WIPI1    | ENSG00000070540 | 17:68428936-68429995:-      | 0.00017919 | 0.199095574   | 0.277398617     |
| 1730 | WIPI1    | ENSG00000070540 | 17:68435712-68436381:-      | 0.00911898 | 0.084268049   | 0.12092113      |
| 1731 | ABCA5    | ENSG00000154265 | 17:69248317-69249904:-      | 5.43E-08   | 0.16518235    | 0.104885191     |
| 1732 | ABCA5    | ENSG00000154265 | 17:69250621-69251746:-      | 4.88E-07   | 0.19662435    | 0.130157182     |
| 1733 | ABCA5    | ENSG00000154265 | 17:69251866-69253572:-      | 1.56E-08   | 0.104349185   | 0.056961575     |
| 1734 | COG1     | ENSG00000166685 | 17:73197081-73197225:+      | 0.00349993 | 0.130214732   | 0.099548061     |
| 1735 | COG1     | ENSG00000166685 | 17:73197396-73199864:+      | 0.0011549  | 0.139933049   | 0.111658447     |
| 1736 | COG1     | ENSG00000166685 | 17:73203793-73205552:+      | 5.81E-05   | 0.1977195     | 0.146949123     |
| 1737 | COG1     | ENSG00000166685 | 17:73205680-73206153:+      | 5.98E-07   | 0.18678703    | 0.127054325     |
| 1738 | RAB37    | ENSG00000172794 | 17:74744929-74745007:+      | 0.0105887  | 0.228769921   | 0.185542866     |
| 1739 | RAB37    | ENSG00000172794 | 17:74745084-74745305:+      | 0.01807689 | 0.413445793   | 0.363144426     |
| 1740 | NAT9     | ENSG00000109065 | 17:74771858-74771959:-      | 0.01568289 | 0.101697587   | 0.081077605     |
| 1741 | NAT9     | ENSG00000109065 | 17:74773039-74773575:-      | 0.00588653 | 0.228488232   | 0.185970848     |
| 1742 | GRIN2C   | ENSG00000161509 | 17:74846920-74847307:-      | 5.63E-07   | 0.378346024   | 0.26537214      |
| 1743 | GRIN2C   | ENSG00000161509 | 17:74847537-74847851:-      | 4.07E-09   | 0.454494549   | 0.283693299     |
| 1744 | GRIN2C   | ENSG00000161509 | 17:74847977-74849779:-      | 3.69E-08   | 0.388682244   | 0.242679542     |
| 1745 | GRIN2C   | ENSG00000161509 | 17:74850371-74850555:-      | 0.00015413 | 0.209421222   | 0.126818301     |
| 1746 | FDXR     | ENSG00000161513 | 17:74862947-74863075:-      | 0.00032725 | 0.13890499    | 0.094300291     |
| 1747 | FDXR     | ENSG00000161513 | 17:74864347-74864479:-      | 0.00210572 | 0.23359322    | 0.207177896     |
| 1748 | HID1     | ENSG00000167861 | 17:74951633-74951904:-      | 0.00702142 | 0.07828895    | 0.091900553     |
| 1749 | HID1     | ENSG00000167861 | 17:74953086-74953544:-      | 0.00096451 | 0.127247696   | 0.111893104     |
| 1750 | HID1     | ENSG00000167861 | 17:74953651-74954137:-      | 0.00239462 | 0.123574489   | 0.109886979     |
| 1751 | HID1     | ENSG00000167861 | 17:74958478-74958672:-      | 0.00021084 | 0.582367707   | 0.503958857     |
| 1752 | HID1     | ENSG00000167861 | 17:74958763-74958910:-      | 0.00044597 | 0.174337904   | 0.124082621     |
| 1753 | MRPL58   | ENSG00000167862 | 17:75012872-75017077:+      | 1.22E-05   | 0.309046123   | 0.246869065     |
| 1754 | ARMC7    | ENSG00000125449 | 17:75110379-75110462:+      | 0.00035082 | 0.099864401   | 0.066060631     |
| 1755 | NUP85    | ENSG00000125450 | 17:75208620-75209822:+      | 0.00631297 | 0.069519998   | 0.10520031      |
| 1756 | NUP85    | ENSG00000125450 | 17:75225464-75225697:+      | 0.04522796 | 0.20893545    | 0.181989677     |
| 1757 | GGA3     | ENSG00000125447 | 17:75238389-75238651:-      | 0.04385467 | 0.15057471    | 0.182187299     |
| 1758 | MRPS7    | ENSG00000125445 | 17:75261983-75262496:+      | 3.67E-05   | 0.208178761   | 0.155671104     |
| 1759 | TMEM94   | ENSG00000177728 | 17:75493102-75493490:+      | 1.79E-07   | 0.595803439   | 0.47949661      |
| 1760 | CASKIN2  | ENSG00000177303 | 17:75503527-75503658:-      | 0.0031879  | 0.172095915   | 0.125179386     |
| 1761 | CASKIN2  | ENSG00000177303 | 17:75506894-75506983:-      | 0.04324893 | 0.170460068   | 0.140089948     |
| 1762 | TSEN54   | ENSG00000182173 | 17:75516910-75517008:+      | 0.00969879 | 0.234268752   | 0.190254663     |
| 1763 | TSEN54   | ENSG00000182173 | 17:75521510-75521704:+      | 1.55E-05   | 0.316035366   | 0.397697364     |
| 1764 | LLGL2    | ENSG00000073350 | 17:75574668-75574870:+      | 0.00640994 | 0.23712716    | 0.176652225     |
| 1765 | MYO15B   | ENSG00000266714 | 17:75619799-75619878:+      | 0.01628908 | 0.14199426    | 0.106611112     |
| 1766 | MYO15B   | ENSG00000266714 | 17:75621570-75622003:+      | 0.0007071  | 0.221458605   | 0.163936478     |

| S/N  | Gene    | Ensembl ID      | Position of retained intron | p-value    | AD_IR_average | Cont_IR_average |
|------|---------|-----------------|-----------------------------|------------|---------------|-----------------|
| 1767 | MYO15B  | ENSG00000266714 | 17:75622080-75623780:+      | 0.00936227 | 0.157068323   | 0.117211542     |
| 1768 | MYO15B  | ENSG00000266714 | 17:75624447-75624542:+      | 0.00169403 | 0.187691216   | 0.134120429     |
| 1769 | MYO15B  | ENSG00000266714 | 17:75625977-75626087:+      | 0.02339499 | 0.164077299   | 0.130554778     |
| 1770 | RECQL5  | ENSG00000108469 | 17:75627522-75627622:-      | 0.00026232 | 0.249055017   | 0.177560948     |
| 1771 | SAP30BP | ENSG00000161526 | 17:75703859-75704755:+      | 0.00025089 | 0.093482888   | 0.071247308     |
| 1772 | WBP2    | ENSG00000132471 | 17:75847609-75848569:-      | 2.43E-05   | 0.060944396   | 0.055402935     |
| 1773 | TRIM65  | ENSG00000141569 | 17:75891347-75892010:-      | 0.00011708 | 0.312897573   | 0.353309143     |
| 1774 | TRIM65  | ENSG00000141569 | 17:75892500-75892754:-      | 0.01442575 | 0.369494268   | 0.330225338     |
| 1775 | MRPL38  | ENSG00000204316 | 17:75901027-75901200:-      | 0.01047926 | 0.099846146   | 0.083030816     |
| 1776 | MRPL38  | ENSG00000204316 | 17:75901273-75901711:-      | 0.01138081 | 0.353446439   | 0.318460182     |
| 1777 | EXOC7   | ENSG00000182473 | 17:76087720-76088059:-      | 1.48E-06   | 0.370108549   | 0.281331779     |
| 1778 | EXOC7   | ENSG00000182473 | 17:76088122-76088463:-      | 0.00048035 | 0.392019805   | 0.33173626      |
| 1779 | QRICH2  | ENSG00000129646 | 17:76276767-76277162:-      | 2.85E-05   | 0.105359182   | 0.069040861     |
| 1780 | QRICH2  | ENSG00000129646 | 17:76277310-76277988:-      | 0.00198392 | 0.175519438   | 0.142222836     |
| 1781 | QRICH2  | ENSG00000129646 | 17:76280451-76280653:-      | 0.00739037 | 0.197279301   | 0.154364325     |
| 1782 | UBE2O   | ENSG00000175931 | 17:76395861-76396127:-      | 1.17E-06   | 0.11431602    | 0.195041868     |
| 1783 | UBE2O   | ENSG00000175931 | 17:76399921-76400146:-      | 0.00117669 | 0.100744839   | 0.147816931     |
| 1784 | MXRA7   | ENSG00000182534 | 17:76683927-76685071:-      | 0.00433702 | 0.026403108   | 0.02178713      |
| 1785 | Sep-09  | ENSG00000184640 | 17:77493076-77497314:+      | 5.78E-05   | 0.144009604   | 0.100547044     |
| 1786 | Sep-09  | ENSG00000184640 | 17:77497366-77498522:+      | 1.06E-06   | 0.129512583   | 0.079681203     |
| 1787 | TNRC6C  | ENSG00000078687 | 17:78093124-78093619:+      | 0.02689826 | 0.086840967   | 0.11138579      |
| 1788 | AFMID   | ENSG00000183077 | 17:78191060-78202702:+      | 6.50E-05   | 0.075413255   | 0.103834599     |
| 1789 | AFMID   | ENSG00000183077 | 17:78191060-78206910:+      | 2.95E-07   | 0.070606267   | 0.094015352     |
| 1790 | BAIAP2  | ENSG00000175866 | 17:81106907-81108474:+      | 0.00015421 | 0.12375623    | 0.085412904     |
| 1791 | CEP131  | ENSG00000141577 | 17:81197055-81197711:-      | 0.00811633 | 0.114267126   | 0.081635403     |
| 1792 | TEPSIN  | ENSG00000167302 | 17:81236801-81236979:-      | 0.04940781 | 0.125054406   | 0.095980006     |
| 1793 | BAHCC1  | ENSG00000266074 | 17:81455390-81456296:+      | 0.04694178 | 0.136488423   | 0.150788766     |
| 1794 | CCDC137 | ENSG00000185298 | 17:81671826-81672075:+      | 0.01163137 | 0.109431026   | 0.089943969     |
| 1795 | HGS     | ENSG00000185359 | 17:81684103-81685604:+      | 0.00071077 | 0.266205101   | 0.217527305     |
| 1796 | HGS     | ENSG00000185359 | 17:81685689-81686311:+      | 0.00202716 | 0.254649174   | 0.216079869     |
| 1797 | HGS     | ENSG00000185359 | 17:81693965-81694814:+      | 0.02257706 | 0.115991654   | 0.097747666     |
| 1798 | HGS     | ENSG00000185359 | 17:81694853-81694923:+      | 0.0228454  | 0.146278139   | 0.126277438     |
| 1799 | HGS     | ENSG00000185359 | 17:81695999-81696356:+      | 0.0007051  | 0.15651468    | 0.121296435     |
| 1800 | HGS     | ENSG00000185359 | 17:81696998-81700466:+      | 0.00021161 | 0.161117406   | 0.128123192     |
| 1801 | HGS     | ENSG00000185359 | 17:81700814-81701044:+      | 1.78E-06   | 0.156913601   | 0.117561383     |
| 1802 | ARHGDI1 | ENSG00000141522 | 17:81869406-81869541:-      | 0.00573049 | 0.130316871   | 0.101974755     |
| 1803 | PCYT2   | ENSG00000185813 | 17:81906177-81906463:-      | 0.00035319 | 0.294623793   | 0.243594429     |
| 1804 | SIRT7   | ENSG00000187531 | 17:81912614-81913773:-      | 0.00226357 | 0.246054993   | 0.273990701     |
| 1805 | SIRT7   | ENSG00000187531 | 17:81914167-81914293:-      | 0.00219131 | 0.093321582   | 0.131471958     |
| 1806 | SIRT7   | ENSG00000187531 | 17:81914702-81915439:-      | 0.04879068 | 0.250843555   | 0.290436727     |
| 1807 | SIRT7   | ENSG00000187531 | 17:81915681-81917614:-      | 0.00427148 | 0.421018228   | 0.367675532     |
| 1808 | ASPSCR1 | ENSG00000169696 | 17:81977748-81983553:+      | 0.00432846 | 0.01630847    | 0.019843118     |
| 1809 | ASPSCR1 | ENSG00000169696 | 17:81996846-82009036:+      | 6.42E-05   | 0.327817171   | 0.247587273     |
| 1810 | CENPX   | ENSG00000169689 | 17:82019219-82019292:-      | 0.00170097 | 0.119793338   | 0.150226684     |
| 1811 | LRRC45  | ENSG00000169683 | 17:82028683-82029092:+      | 0.00199916 | 0.5419845     | 0.511387013     |
| 1812 | DCXR    | ENSG00000169738 | 17:82036643-82036720:-      | 0.00116493 | 0.134007917   | 0.104485842     |
| 1813 | RFNG    | ENSG00000169733 | 17:82049842-82049917:-      | 0.00232905 | 0.745349061   | 0.692949143     |
| 1814 | RFNG    | ENSG00000169733 | 17:82050006-82050401:-      | 0.0107592  | 0.806001232   | 0.772260026     |
| 1815 | DUS1L   | ENSG00000169718 | 17:82058408-82058780:-      | 0.01580533 | 0.509601671   | 0.565806195     |
| 1816 | DUS1L   | ENSG00000169718 | 17:82060093-82060700:-      | 1.19E-08   | 0.204083362   | 0.133784927     |
| 1817 | FASN    | ENSG00000169710 | 17:82091684-82092454:-      | 0.0042098  | 0.07567732    | 0.124187388     |
| 1818 | CSNK1D  | ENSG00000141551 | 17:82253244-82255428:-      | 1.39E-07   | 0.241150022   | 0.179308975     |
| 1819 | CSNK1D  | ENSG00000141551 | 17:82265796-82273305:-      | 0.00517377 | 0.105977324   | 0.084400844     |
| 1820 | HEXDC   | ENSG00000169660 | 17:82435872-82436666:+      | 4.37E-05   | 0.184729776   | 0.129515468     |
| 1821 | NARF    | ENSG00000141562 | 17:82478918-82481081:+      | 0.00140618 | 0.193146623   | 0.159276474     |
| 1822 | FN3KRP  | ENSG00000141560 | 17:82716896-82718905:+      | 0.00056178 | 0.264610463   | 0.219526777     |
| 1823 | FN3KRP  | ENSG00000141560 | 17:82719057-82720271:+      | 0.01477859 | 0.132040322   | 0.118101825     |

| S/N  | Gene    | Ensembl ID      | Position of retained intron | p-value    | AD_IR_average | Cont_IR_average |
|------|---------|-----------------|-----------------------------|------------|---------------|-----------------|
| 1824 | TBCD    | ENSG00000141556 | 17:82920618-82921500:+      | 0.00044831 | 0.119960137   | 0.151492996     |
| 1825 | TBCD    | ENSG00000141556 | 17:82929500-82930521:+      | 6.68E-11   | 0.594779037   | 0.482330675     |
| 1826 | TBCD    | ENSG00000141556 | 17:82932735-82937270:+      | 9.08E-05   | 0.111152168   | 0.08671147      |
| 1827 | USP14   | ENSG00000101557 | 18:210031-210385:+          | 0.00140748 | 0.153019282   | 0.214270016     |
| 1828 | THOC1   | ENSG00000079134 | 18:215504-216485:-          | 0.00224621 | 0.11056605    | 0.09056704      |
| 1829 | THOC1   | ENSG00000079134 | 18:225139-225336:-          | 0.00044212 | 0.590564963   | 0.648072649     |
| 1830 | ELP2    | ENSG00000134759 | 18:36167222-36170062:+      | 0.00493304 | 0.207430826   | 0.175434645     |
| 1831 | ELP2    | ENSG00000134759 | 18:36170196-36171046:+      | 0.00136756 | 0.091628912   | 0.070647573     |
| 1832 | CTIF    | ENSG00000134030 | 18:48758405-48761389:+      | 0.00090099 | 0.132280451   | 0.110708409     |
| 1833 | MBD1    | ENSG00000141644 | 18:50271540-50272676:-      | 1.41E-05   | 0.278909268   | 0.245391487     |
| 1834 | MBD1    | ENSG00000141644 | 18:50275728-50275834:-      | 0.03495876 | 0.078582046   | 0.105832677     |
| 1835 | CXXC1   | ENSG00000154832 | 18:50283564-50283704:-      | 5.76E-09   | 0.66467461    | 0.549521481     |
| 1836 | CXXC1   | ENSG00000154832 | 18:50285247-50285324:-      | 1.62E-06   | 0.206483813   | 0.272032351     |
| 1837 | CXXC1   | ENSG00000154832 | 18:50285351-50285748:-      | 7.48E-07   | 0.224463141   | 0.298323013     |
| 1838 | CXXC1   | ENSG00000154832 | 18:50285928-50286021:-      | 1.54E-16   | 0.07507582    | 0.147021648     |
| 1839 | CXXC1   | ENSG00000154832 | 18:50286858-50287586:-      | 5.99E-05   | 0.177017939   | 0.227496255     |
| 1840 | RTTN    | ENSG00000176225 | 18:70005267-70006380:-      | 0.00081772 | 0.124053596   | 0.086756684     |
| 1841 | MBP     | ENSG00000197971 | 18:76985210-76988494:-      | 0.001699   | 0.020340328   | 0.013394553     |
| 1842 | CTDP1   | ENSG00000060069 | 18:79729069-79736354:+      | 0.00010132 | 0.230284845   | 0.152426118     |
| 1843 | HSBP1L1 | ENSG00000226742 | 18:79964786-79966611:+      | 0.0001773  | 0.300884752   | 0.374362803     |
| 1844 | HSBP1L1 | ENSG00000226742 | 18:79968183-79970439:+      | 0.00015896 | 0.183788646   | 0.149827525     |
| 1845 | TXNL4A  | ENSG00000141759 | 18:79973856-79988239:-      | 0.00537143 | 0.018760831   | 0.013959303     |
| 1846 | MIER2   | ENSG00000105556 | 19:326598-327132:-          | 0.00325693 | 0.13346635    | 0.106173019     |
| 1847 | RNF126  | ENSG00000070423 | 19:650296-651610:-          | 3.39E-05   | 0.315368427   | 0.258141784     |
| 1848 | PTBP1   | ENSG00000011304 | 19:803636-804035:+          | 0.00435547 | 0.086997694   | 0.114467008     |
| 1849 | WDR18   | ENSG00000065268 | 19:990364-990851:+          | 7.59E-07   | 0.486988976   | 0.359211442     |
| 1850 | TMEM259 | ENSG00000182087 | 19:1011663-1011740:-        | 0.00109202 | 0.210582417   | 0.168431808     |
| 1851 | TMEM259 | ENSG00000182087 | 19:1012188-1012462:-        | 0.02783646 | 0.400244951   | 0.437445844     |
| 1852 | ABCA7   | ENSG00000064687 | 19:1063863-1064160:+        | 0.01862035 | 0.246312804   | 0.212785127     |
| 1853 | SBNO2   | ENSG00000064932 | 19:1109777-1110744:-        | 0.02041225 | 0.132979504   | 0.155411986     |
| 1854 | STK11   | ENSG00000118046 | 19:1220505-1220580:+        | 0.04708104 | 0.222369463   | 0.191797935     |
| 1855 | STK11   | ENSG00000118046 | 19:1226663-1227592:+        | 4.45E-07   | 0.225741243   | 0.135504435     |
| 1856 | ATP5D   | ENSG00000099624 | 19:1241991-1242455:+        | 1.16E-06   | 0.133163591   | 0.08175941      |
| 1857 | GAMT    | ENSG00000130005 | 19:1399587-1399792:-        | 3.46E-05   | 0.10356606    | 0.068293381     |
| 1858 | DAZAP1  | ENSG00000071626 | 19:1425960-1428841:+        | 0.02922772 | 0.357604732   | 0.323929558     |
| 1859 | APC2    | ENSG00000115266 | 19:1458060-1460180:+        | 0.00347085 | 0.113373902   | 0.155690494     |
| 1860 | APC2    | ENSG00000115266 | 19:1460857-1461036:+        | 0.02842326 | 0.083036243   | 0.106842894     |
| 1861 | PLK5    | ENSG00000185988 | 19:1525418-1525594:+        | 0.02384746 | 0.147429834   | 0.116005678     |
| 1862 | PLK5    | ENSG00000185988 | 19:1528134-1528301:+        | 0.00243874 | 0.12688192    | 0.074359201     |
| 1863 | PLK5    | ENSG00000185988 | 19:1528428-1528897:+        | 0.00366204 | 0.1528864     | 0.10416271      |
| 1864 | PLK5    | ENSG00000185988 | 19:1528974-1529405:+        | 0.001224   | 0.386528012   | 0.291265576     |
| 1865 | PLK5    | ENSG00000185988 | 19:1529824-1531737:+        | 0.01036606 | 0.248361282   | 0.197008026     |
| 1866 | MBD3    | ENSG00000071655 | 19:1578158-1578334:-        | 0.02722699 | 0.093741543   | 0.075143419     |
| 1867 | MBD3    | ENSG00000071655 | 19:1585214-1592521:-        | 0.00235663 | 0.32701122    | 0.266733931     |
| 1868 | REXO1   | ENSG00000079313 | 19:1823785-1825838:-        | 0.02529832 | 0.186319506   | 0.213168922     |
| 1869 | SCAMP4  | ENSG00000227500 | 19:1905439-1914978:+        | 0.00073101 | 0.080688752   | 0.068592512     |
| 1870 | SCAMP4  | ENSG00000227500 | 19:1915026-1917693:+        | 0.01518448 | 0.238427248   | 0.220840582     |
| 1871 | SCAMP4  | ENSG00000227500 | 19:1918990-1923069:+        | 0.00112525 | 0.213708624   | 0.184019935     |
| 1872 | CSNK1G2 | ENSG00000133275 | 19:1979093-1979162:+        | 0.02153433 | 0.365229732   | 0.307666758     |
| 1873 | BTBD2   | ENSG00000133243 | 19:1986649-1986829:-        | 6.34E-05   | 0.114995117   | 0.085272538     |
| 1874 | BTBD2   | ENSG00000133243 | 19:1986976-1987165:-        | 0.00383093 | 0.122580417   | 0.097823327     |
| 1875 | BTBD2   | ENSG00000133243 | 19:1987692-1990003:-        | 0.03627529 | 0.194796349   | 0.173543919     |
| 1876 | IZUMO4  | ENSG00000099840 | 19:2097495-2097928:+        | 3.41E-15   | 0.120013416   | 0.048857661     |
| 1877 | IZUMO4  | ENSG00000099840 | 19:2097955-2098051:+        | 0.01227755 | 0.235260683   | 0.19193607      |
| 1878 | IZUMO4  | ENSG00000099840 | 19:2098127-2098286:+        | 8.84E-09   | 0.492443402   | 0.350621494     |
| 1879 | IZUMO4  | ENSG00000099840 | 19:2098334-2098435:+        | 2.29E-06   | 0.153092468   | 0.091539657     |
| 1880 | AP3D1   | ENSG00000065000 | 19:2110896-2111284:-        | 0.00807813 | 0.153110391   | 0.132475401     |

| S/N  | Gene     | Ensembl ID      | Position of retained intron | p-value    | AD_IR_average | Cont_IR_average |
|------|----------|-----------------|-----------------------------|------------|---------------|-----------------|
| 1882 | AP3D1    | ENSG00000065000 | 19:2111828-2112859:-        | 0.01633234 | 0.211685299   | 0.178487544     |
| 1883 | AP3D1    | ENSG00000065000 | 19:2113413-2114124:-        | 0.0110951  | 0.113815451   | 0.093520924     |
| 1884 | DOT1L    | ENSG00000104885 | 19:2227127-2229784:+        | 0.00093479 | 0.55593322    | 0.505568662     |
| 1885 | PLEKHJ1  | ENSG00000104886 | 19:2235828-2235922:-        | 8.81E-08   | 0.173711848   | 0.107947977     |
| 1886 | LSM7     | ENSG00000130332 | 19:2324192-2328386:-        | 0.0001022  | 0.094478851   | 0.07348154      |
| 1887 | LSM7     | ENSG00000130332 | 19:2328477-2328560:-        | 0.00057007 | 0.258637032   | 0.202288527     |
| 1888 | SPPL2B   | ENSG00000005206 | 19:2334721-2337442:+        | 0.00059956 | 0.114607875   | 0.074673684     |
| 1889 | SPPL2B   | ENSG00000005206 | 19:2344424-2344552:+        | 3.09E-05   | 0.181392144   | 0.129264849     |
| 1890 | LMNB2    | ENSG00000176619 | 19:2430952-2431547:-        | 0.02477434 | 0.132915705   | 0.109097177     |
| 1891 | SGTA     | ENSG00000104969 | 19:2757782-2759256:-        | 0.00012573 | 0.194388487   | 0.151857948     |
| 1892 | SGTA     | ENSG00000104969 | 19:2759294-2761459:-        | 3.38E-06   | 0.176960196   | 0.12394924      |
| 1893 | MFS12    | ENSG00000161091 | 19:3544939-3546073:-        | 0.00342561 | 0.670216427   | 0.706025475     |
| 1894 | APBA3    | ENSG00000011132 | 19:3751329-3751433:-        | 0.00333789 | 0.239165485   | 0.181291661     |
| 1895 | APBA3    | ENSG00000011132 | 19:3751553-3752507:-        | 0.03184392 | 0.560212415   | 0.510602481     |
| 1896 | PIAS4    | ENSG00000105229 | 19:4033580-4037373:+        | 4.03E-08   | 0.452005585   | 0.338352623     |
| 1897 | SIRT6    | ENSG00000077463 | 19:4175760-4175841:-        | 0.04404474 | 0.280687524   | 0.242935086     |
| 1898 | SIRT6    | ENSG00000077463 | 19:4179286-4180781:-        | 0.00553913 | 0.10269526    | 0.086228635     |
| 1899 | FSD1     | ENSG00000105255 | 19:4310596-4311841:+        | 9.89E-06   | 0.60576022    | 0.524171922     |
| 1900 | MPND     | ENSG00000008382 | 19:4355021-4355096:+        | 5.11E-06   | 0.22121761    | 0.134533335     |
| 1901 | MPND     | ENSG00000008382 | 19:4359255-4359915:+        | 7.77E-07   | 0.209410657   | 0.123330095     |
| 1902 | UBXN6    | ENSG00000167671 | 19:4446197-4446282:-        | 0.00283343 | 0.174097011   | 0.137778396     |
| 1903 | SEMA6B   | ENSG00000167680 | 19:4552639-4554387:-        | 7.51E-05   | 0.190642521   | 0.137657327     |
| 1904 | SEMA6B   | ENSG00000167680 | 19:4555095-4555473:-        | 0.00032248 | 0.090802196   | 0.063173612     |
| 1905 | SEMA6B   | ENSG00000167680 | 19:4555564-4555987:-        | 0.0004875  | 0.100984549   | 0.068720938     |
| 1906 | SAFB2    | ENSG00000130254 | 19:5592887-5593890:-        | 4.75E-07   | 0.093205939   | 0.058669996     |
| 1907 | SAFB     | ENSG00000160633 | 19:5648043-5648988:+        | 0.00054847 | 0.174463187   | 0.250509361     |
| 1908 | SAFB     | ENSG00000160633 | 19:5667450-5667819:+        | 0.00424885 | 0.10752256    | 0.080825549     |
| 1909 | HSD11B1L | ENSG00000167733 | 19:5686991-5687281:+        | 0.00019048 | 0.17921503    | 0.135781457     |
| 1910 | HSD11B1L | ENSG00000167733 | 19:5687375-5687502:+        | 6.03E-06   | 0.248365179   | 0.180279921     |
| 1911 | LONP1    | ENSG00000196365 | 19:5708403-5711770:-        | 0.01859429 | 0.200490185   | 0.174144112     |
| 1912 | DUS3L    | ENSG00000141994 | 19:5785791-5786466:-        | 0.01266826 | 0.1442908     | 0.11055839      |
| 1913 | DUS3L    | ENSG00000141994 | 19:5786542-5786748:-        | 0.03465721 | 0.108030044   | 0.083416077     |
| 1914 | CAPS     | ENSG00000105519 | 19:5914489-5914562:+        | 0.00025657 | 0.29493707    | 0.189258157     |
| 1915 | CAPS     | ENSG00000105519 | 19:5914740-5914939:+        | 8.00E-05   | 0.214731417   | 0.127694981     |
| 1916 | CAPS     | ENSG00000105519 | 19:5915146-5915220:+        | 0.0001847  | 0.209889815   | 0.130145564     |
| 1917 | SLC25A23 | ENSG00000125648 | 19:6452479-6453980:-        | 0.00283922 | 0.113126823   | 0.095495821     |
| 1918 | GPR108   | ENSG00000125734 | 19:6732549-6732986:-        | 0.0457538  | 0.298594546   | 0.265758757     |
| 1919 | GPR108   | ENSG00000125734 | 19:6733062-6733167:-        | 0.00243493 | 0.109775968   | 0.138599752     |
| 1920 | GPR108   | ENSG00000125734 | 19:6733913-6734004:-        | 0.00036066 | 0.315833976   | 0.264825849     |
| 1921 | GPR108   | ENSG00000125734 | 19:6734307-6735621:-        | 4.26E-05   | 0.143813591   | 0.10971559      |
| 1922 | GPR108   | ENSG00000125734 | 19:6735958-6736591:-        | 0.00395843 | 0.092731306   | 0.075602603     |
| 1923 | MCOLN1   | ENSG00000090674 | 19:7527960-7528157:+        | 0.00230948 | 0.165905813   | 0.132377442     |
| 1924 | PNPLA6   | ENSG00000032444 | 19:7541051-7541353:+        | 0.00228475 | 0.071514224   | 0.101843503     |
| 1925 | PNPLA6   | ENSG00000032444 | 19:7550640-7550993:+        | 0.00365956 | 0.113424599   | 0.143066904     |
| 1926 | XAB2     | ENSG00000076924 | 19:7619647-7619746:-        | 0.00062251 | 0.130808482   | 0.082542115     |
| 1927 | XAB2     | ENSG00000076924 | 19:7620446-7620546:-        | 0.0005583  | 0.066263112   | 0.089890321     |
| 1928 | XAB2     | ENSG00000076924 | 19:7628298-7629476:-        | 0.04715708 | 0.143785482   | 0.129783197     |
| 1929 | EVI5L    | ENSG00000142459 | 19:7847921-7848920:+        | 0.0010049  | 0.181336567   | 0.131030874     |
| 1930 | MAP2K7   | ENSG00000076984 | 19:7909896-7910062:+        | 0.00386777 | 0.207879391   | 0.171146018     |
| 1931 | MAP2K7   | ENSG00000076984 | 19:7910373-7910452:+        | 0.0384851  | 0.183976549   | 0.160250821     |
| 1932 | TIMM44   | ENSG00000104980 | 19:7928166-7931137:-        | 0.02239529 | 0.22165659    | 0.198139834     |
| 1933 | TIMM44   | ENSG00000104980 | 19:7932932-7933484:-        | 7.41E-07   | 0.134280798   | 0.084164286     |
| 1934 | TIMM44   | ENSG00000104980 | 19:7933570-7933863:-        | 0.02500174 | 0.371517427   | 0.332923714     |
| 1935 | CERS4    | ENSG00000090661 | 19:8255879-8256235:+        | 3.52E-08   | 0.284390866   | 0.210982313     |
| 1936 | CERS4    | ENSG00000090661 | 19:8257985-8261687:+        | 0.00145441 | 0.10695938    | 0.088402432     |
| 1937 | ZNF414   | ENSG00000133250 | 19:8513341-8514043:-        | 0.02293882 | 0.110795861   | 0.091512006     |
| 1938 | EIF3G    | ENSG00000130811 | 19:10116074-10116799:-      | 0.00548979 | 0.119378577   | 0.095982204     |



| S/N  | Gene    | Ensembl ID      | Position of retained intron | p-value    | AD_IR_average | Cont_IR_average |
|------|---------|-----------------|-----------------------------|------------|---------------|-----------------|
| 1939 | EIF3G   | ENSG00000130811 | 19:10117188-10118667:-      | 0.01208265 | 0.094390789   | 0.083184952     |
| 1940 | DNMT1   | ENSG00000130816 | 19:10133701-10134216:-      | 0.00729419 | 0.134367365   | 0.107975271     |
| 1941 | DNMT1   | ENSG00000130816 | 19:10139817-10140045:-      | 7.26E-05   | 0.069707698   | 0.106260313     |
| 1942 | DNMT1   | ENSG00000130816 | 19:10141189-10142027:-      | 0.03282387 | 0.153797911   | 0.19210319      |
| 1943 | MRPL4   | ENSG00000105364 | 19:10258522-10258608:+      | 0.00501381 | 0.303073683   | 0.259881448     |
| 1944 | ZGLP1   | ENSG00000220201 | 19:10308550-10309348:-      | 0.02573761 | 0.336809496   | 0.285405923     |
| 1945 | RAVER1  | ENSG00000161847 | 19:10321259-10321530:-      | 0.04898063 | 0.118064777   | 0.101707912     |
| 1946 | TYK2    | ENSG00000105397 | 19:10364771-10364850:-      | 0.03323689 | 0.111019429   | 0.089350974     |
| 1947 | CDC37   | ENSG00000105401 | 19:10395343-10395434:-      | 1.29E-07   | 0.201296718   | 0.291356149     |
| 1948 | ATG4D   | ENSG00000130734 | 19:10545130-10546838:+      | 0.03665285 | 0.081746229   | 0.095296869     |
| 1949 | ATG4D   | ENSG00000130734 | 19:10547115-10547188:+      | 0.01382654 | 0.339648256   | 0.290635482     |
| 1950 | KRI1    | ENSG00000129347 | 19:10557682-10557768:-      | 0.00221352 | 0.279148098   | 0.33525139      |
| 1951 | KRI1    | ENSG00000129347 | 19:10565034-10565716:-      | 0.03730742 | 0.21822974    | 0.196074499     |
| 1952 | KRI1    | ENSG00000129347 | 19:10565790-10565905:-      | 0.00034855 | 0.088667183   | 0.057704259     |
| 1953 | QTRT1   | ENSG00000213339 | 19:10701703-10701949:+      | 0.00075518 | 0.202921688   | 0.161493375     |
| 1954 | QTRT1   | ENSG00000213339 | 19:10712628-10712757:+      | 0.00018062 | 0.143446697   | 0.092208945     |
| 1955 | DNM2    | ENSG00000079805 | 19:10795439-10797379:+      | 9.12E-06   | 0.095434145   | 0.130329314     |
| 1956 | DNM2    | ENSG00000079805 | 19:10805967-10812263:+      | 0.00019282 | 0.118406579   | 0.098859922     |
| 1957 | DNM2    | ENSG00000079805 | 19:10829268-10830126:+      | 0.00120109 | 0.180510428   | 0.152782458     |
| 1958 | DNM2    | ENSG00000079805 | 19:10830378-10830977:+      | 1.21E-06   | 0.149745485   | 0.103866474     |
| 1959 | CARM1   | ENSG00000142453 | 19:10916777-10919594:+      | 0.01037075 | 0.304053988   | 0.268924934     |
| 1960 | CARM1   | ENSG00000142453 | 19:10919680-10919876:+      | 0.0069291  | 0.340749866   | 0.295478843     |
| 1961 | TMEM205 | ENSG00000105518 | 19:11345415-11345519:-      | 0.01536216 | 0.198644094   | 0.228419888     |
| 1962 | CCDC159 | ENSG00000183401 | 19:11352133-11353450:+      | 0.00723455 | 0.136423874   | 0.109014881     |
| 1963 | PRKCSH  | ENSG00000130175 | 19:11447618-11447692:+      | 5.52E-05   | 0.253153488   | 0.225485491     |
| 1964 | PRKCSH  | ENSG00000130175 | 19:11447789-11448221:+      | 5.72E-06   | 0.280464304   | 0.209156087     |
| 1965 | PRKCSH  | ENSG00000130175 | 19:11448291-11448539:+      | 0.00892417 | 0.101946118   | 0.081419371     |
| 1966 | ELAVL3  | ENSG00000196361 | 19:11466827-11480599:-      | 0.00162975 | 0.105776598   | 0.159194247     |
| 1967 | ZNF653  | ENSG00000161914 | 19:11487158-11487291:-      | 0.01668986 | 0.206358455   | 0.243057577     |
| 1968 | MAN2B1  | ENSG00000104774 | 19:12656687-12656948:-      | 0.00378395 | 0.164128112   | 0.131519707     |
| 1969 | WDR83   | ENSG00000123154 | 19:12670285-12670562:+      | 0.01370353 | 0.580980378   | 0.525944688     |
| 1970 | WDR83   | ENSG00000123154 | 19:12672914-12673007:+      | 0.00018903 | 0.347249355   | 0.27207274      |
| 1971 | WDR83   | ENSG00000123154 | 19:12673116-12673201:+      | 1.98E-05   | 0.378151415   | 0.292311588     |
| 1972 | WDR83   | ENSG00000123154 | 19:12673316-12675522:+      | 4.41E-09   | 0.364903683   | 0.253707688     |
| 1973 | TNPO2   | ENSG00000105576 | 19:12705599-12705681:-      | 0.00058928 | 0.102442887   | 0.075146539     |
| 1974 | TNPO2   | ENSG00000105576 | 19:12710773-12711295:-      | 0.00184326 | 0.109634721   | 0.087965188     |
| 1975 | MAST1   | ENSG00000105613 | 19:12866102-12866652:+      | 1.48E-05   | 0.484023529   | 0.361886987     |
| 1976 | GCDH    | ENSG00000105607 | 19:12896421-12896909:+      | 2.43E-09   | 0.164108663   | 0.095686569     |
| 1977 | GCDH    | ENSG00000105607 | 19:12897428-12897702:+      | 3.78E-05   | 0.138213141   | 0.09667261      |
| 1978 | NFIX    | ENSG00000008441 | 19:13081855-13087988:+      | 0.00058255 | 0.046214179   | 0.037782368     |
| 1979 | NFIX    | ENSG00000008441 | 19:13088136-13090298:+      | 0.00089493 | 0.027350207   | 0.022595546     |
| 1980 | TRMT1   | ENSG00000104907 | 19:13109838-13109914:-      | 0.00477924 | 0.182482226   | 0.144149274     |
| 1981 | TRMT1   | ENSG00000104907 | 19:13110001-13110157:-      | 0.04266995 | 0.145854099   | 0.124228396     |
| 1982 | STX10   | ENSG00000104915 | 19:13149897-13150138:-      | 0.03949033 | 0.426588573   | 0.392549662     |
| 1983 | MRI1    | ENSG00000037757 | 19:13768737-13768823:+      | 0.00109194 | 0.102288188   | 0.073538364     |
| 1984 | DCAF15  | ENSG00000132017 | 19:13956018-13956122:+      | 6.87E-06   | 0.160482112   | 0.105802838     |
| 1985 | DCAF15  | ENSG00000132017 | 19:13960391-13960464:+      | 0.00975279 | 0.457564878   | 0.383071078     |
| 1986 | DCAF15  | ENSG00000132017 | 19:13960580-13960939:+      | 1.39E-06   | 0.273456849   | 0.171233516     |
| 1987 | RFX1    | ENSG00000132005 | 19:13966751-13968564:-      | 0.03953664 | 0.161740116   | 0.13715739      |
| 1988 | GIPC1   | ENSG00000123159 | 19:14480778-14491655:-      | 2.77E-05   | 0.03194697    | 0.03900743      |
| 1989 | DNAJB1  | ENSG00000132002 | 19:14516170-14516465:-      | 5.88E-05   | 0.073593889   | 0.046607904     |
| 1990 | TECR    | ENSG00000099797 | 19:14564858-14564948:+      | 0.00732343 | 0.163036382   | 0.130817283     |
| 1991 | TECR    | ENSG00000099797 | 19:14564992-14565065:+      | 0.02397358 | 0.130909659   | 0.105592386     |
| 1992 | ILVBL   | ENSG00000105135 | 19:15115430-15115565:-      | 1.58E-06   | 0.339692415   | 0.240323197     |
| 1993 | ILVBL   | ENSG00000105135 | 19:15115671-15115849:-      | 6.16E-06   | 0.287316146   | 0.210422173     |
| 1994 | ILVBL   | ENSG00000105135 | 19:15116071-15116151:-      | 0.02209171 | 0.227212163   | 0.195043186     |
| 1995 | ILVBL   | ENSG00000105135 | 19:15122804-15122891:-      | 0.02650301 | 0.084219327   | 0.104987008     |

| S/N  | Gene     | Ensembl ID      | Position of retained intron | p-value    | AD_IR_average | Cont_IR_average |
|------|----------|-----------------|-----------------------------|------------|---------------|-----------------|
| 1996 | AKAP8    | ENSG00000105127 | 19:15368322-15370145:-      | 0.00751397 | 0.109587396   | 0.148700334     |
| 1997 | AKAP8L   | ENSG00000011243 | 19:15399410-15400294:-      | 7.08E-11   | 0.138413952   | 0.215105584     |
| 1998 | AKAP8L   | ENSG00000011243 | 19:15403555-15403657:-      | 0.02027587 | 0.815758744   | 0.779727234     |
| 1999 | WIZ      | ENSG00000011451 | 19:15425768-15426981:-      | 0.03886799 | 0.159471074   | 0.130225289     |
| 2000 | TPM4     | ENSG00000167460 | 19:16093753-16095263:+      | 0.00300104 | 0.023853992   | 0.029993412     |
| 2001 | RAB8A    | ENSG00000167461 | 19:16129604-16132211:+      | 0.00904858 | 0.166697528   | 0.149497455     |
| 2002 | EPS15L1  | ENSG00000127527 | 19:16377254-16385128:-      | 0.00062985 | 0.100535198   | 0.081737844     |
| 2003 | CHERP    | ENSG00000085872 | 19:16520265-16520363:-      | 0.00040191 | 0.235000634   | 0.295912961     |
| 2004 | CHERP    | ENSG00000085872 | 19:16520507-16520825:-      | 0.00646965 | 0.243876683   | 0.293600987     |
| 2005 | MYO9B    | ENSG00000099331 | 19:17162466-17162987:+      | 2.56E-06   | 0.094669488   | 0.055336206     |
| 2006 | OCEL1    | ENSG00000099330 | 19:17228005-17228255:+      | 0.04568701 | 0.128634677   | 0.109376121     |
| 2007 | AC010646 | ENSG00000269095 | 19:17236065-17240670:-      | 0.01132495 | 0.195495499   | 0.150244603     |
| 2008 | BABAM1   | ENSG00000105393 | 19:17275825-17276494:+      | 0.00994416 | 0.10691416    | 0.092082079     |
| 2009 | BABAM1   | ENSG00000105393 | 19:17276624-17276822:+      | 0.00011125 | 0.213905795   | 0.171220465     |
| 2010 | BABAM1   | ENSG00000105393 | 19:17276909-17278844:+      | 0.01533632 | 0.158475099   | 0.135961379     |
| 2011 | ANO8     | ENSG00000074855 | 19:17327569-17327688:-      | 0.02811017 | 0.212744648   | 0.177127642     |
| 2012 | ANO8     | ENSG00000074855 | 19:17331215-17331294:-      | 0.00130941 | 0.186269751   | 0.135917284     |
| 2013 | ANO8     | ENSG00000074855 | 19:17331411-17332929:-      | 0.00057126 | 0.13500186    | 0.097909461     |
| 2014 | ANO8     | ENSG00000074855 | 19:17333026-17333100:-      | 0.00094323 | 0.125412855   | 0.08925619      |
| 2015 | MVB12A   | ENSG00000141971 | 19:17424067-17424620:+      | 0.02356685 | 0.097239428   | 0.072858908     |
| 2016 | SLC27A1  | ENSG00000130304 | 19:17487529-17488847:+      | 0.01571273 | 0.088444145   | 0.075675939     |
| 2017 | SLC27A1  | ENSG00000130304 | 19:17489117-17497254:+      | 0.00168627 | 0.15189729    | 0.11845299      |
| 2018 | SLC27A1  | ENSG00000130304 | 19:17500632-17500711:+      | 0.00034506 | 0.153252157   | 0.121162549     |
| 2019 | SLC27A1  | ENSG00000130304 | 19:17500876-17501272:+      | 9.38E-05   | 0.340111354   | 0.284057909     |
| 2020 | SLC27A1  | ENSG00000130304 | 19:17501419-17504454:+      | 0.00035945 | 0.134384034   | 0.103607855     |
| 2021 | PGLS     | ENSG00000130313 | 19:17511960-17516172:+      | 0.00783796 | 0.132764255   | 0.105725621     |
| 2022 | FCHO1    | ENSG00000130475 | 19:17772741-17774238:+      | 0.00959073 | 0.162190107   | 0.136575122     |
| 2023 | FCHO1    | ENSG00000130475 | 19:17774478-17775055:+      | 0.00076476 | 0.320448439   | 0.252746627     |
| 2024 | FCHO1    | ENSG00000130475 | 19:17776686-17778136:+      | 0.0369604  | 0.295788061   | 0.269820181     |
| 2025 | FCHO1    | ENSG00000130475 | 19:17778228-17778608:+      | 0.02992704 | 0.251425394   | 0.222801912     |
| 2026 | AC007192 | ENSG00000268173 | 19:18168546-18168725:+      | 0.00507958 | 0.103311594   | 0.085066465     |
| 2027 | SSBP4    | ENSG00000130511 | 19:18431862-18431999:+      | 0.00811621 | 0.1328424     | 0.104565203     |
| 2028 | SSBP4    | ENSG00000130511 | 19:18432214-18432558:+      | 9.46E-05   | 0.095657522   | 0.064077488     |
| 2029 | C19orf60 | ENSG00000006015 | 19:18589683-18590853:+      | 0.00372893 | 0.119796262   | 0.083559827     |
| 2030 | TMEM59L  | ENSG00000105696 | 19:18618272-18618374:+      | 0.01468278 | 0.286888622   | 0.237065921     |
| 2031 | CRTC1    | ENSG00000105662 | 19:18765528-18768484:+      | 0.03749167 | 0.227264165   | 0.192806878     |
| 2032 | CRTC1    | ENSG00000105662 | 19:18775821-18777170:+      | 0.00028506 | 0.114226067   | 0.076737975     |
| 2033 | SUGP2    | ENSG00000064607 | 19:18993740-18994365:-      | 0.00293348 | 0.280103944   | 0.260429665     |
| 2034 | ARMC6    | ENSG00000105676 | 19:19055928-19057415:+      | 0.00078805 | 0.280367829   | 0.232405365     |
| 2035 | SLC25A42 | ENSG00000181035 | 19:19104938-19105560:+      | 0.0431443  | 0.097737329   | 0.08395637      |
| 2036 | SLC25A42 | ENSG00000181035 | 19:19105727-19106268:+      | 0.00012526 | 0.10727054    | 0.070817638     |
| 2037 | TMEM161  | ENSG00000064545 | 19:19121668-19121758:-      | 0.00680224 | 0.335541863   | 0.27555881      |
| 2038 | TMEM161  | ENSG00000064545 | 19:19121819-19130155:-      | 0.00022615 | 0.161014401   | 0.123969316     |
| 2039 | TMEM161  | ENSG00000064545 | 19:19132508-19132656:-      | 0.00320029 | 0.116480289   | 0.092711786     |
| 2040 | TMEM161  | ENSG00000064545 | 19:19132754-19133129:-      | 2.82E-06   | 0.240104989   | 0.173272586     |
| 2041 | RFXANK   | ENSG00000064490 | 19:19197046-19197185:+      | 0.00038936 | 0.148734629   | 0.104902067     |
| 2042 | RFXANK   | ENSG00000064490 | 19:19198232-19198656:+      | 4.37E-07   | 0.200090613   | 0.120880112     |
| 2043 | NR2C2AP  | ENSG00000184162 | 19:19202881-19203022:-      | 0.00020659 | 0.273316061   | 0.218833164     |
| 2044 | SUGP1    | ENSG00000105705 | 19:19302388-19303347:-      | 0.00529114 | 0.142848312   | 0.127603706     |
| 2045 | ATP13A1  | ENSG00000105726 | 19:19647528-19647598:-      | 0.03953165 | 0.176385106   | 0.144672075     |
| 2046 | ATP13A1  | ENSG00000105726 | 19:19652720-19653783:-      | 0.00434536 | 0.102779893   | 0.127246209     |
| 2047 | ZNF91    | ENSG00000167232 | 19:23342265-23358429:-      | 0.00054145 | 0.293446738   | 0.214032395     |
| 2048 | PDCD5    | ENSG00000105185 | 19:32582232-32584949:+      | 0.03222575 | 0.109062072   | 0.08544696      |
| 2049 | PDCD5    | ENSG00000105185 | 19:32586929-32587252:+      | 0.01428968 | 0.253449009   | 0.28842413      |
| 2050 | LRP3     | ENSG00000130881 | 19:33204852-33205245:+      | 9.49E-07   | 0.133377563   | 0.096552226     |
| 2051 | LSM14A   | ENSG00000257103 | 19:34221738-34226407:+      | 1.53E-07   | 0.086527737   | 0.049639991     |
| 2052 | LSM14A   | ENSG00000257103 | 19:34221738-34227364:+      | 7.88E-07   | 0.086864378   | 0.049623029     |

| S/N  | Gene      | Ensembl ID      | Position of retained intron | p-value    | AD_IR_average | Cont_IR_average |
|------|-----------|-----------------|-----------------------------|------------|---------------|-----------------|
| 2053 | LSM14A    | ENSG00000257103 | 19:34226464-34227364:+      | 0.00067375 | 0.13843157    | 0.107205816     |
| 2054 | ZNF302    | ENSG00000089335 | 19:34683238-34683991:+      | 0.00623309 | 0.149935972   | 0.167018929     |
| 2055 | GRAMD1A   | ENSG00000089351 | 19:35009443-35009887:+      | 0.00193011 | 0.121244713   | 0.096969016     |
| 2056 | GRAMD1A   | ENSG00000089351 | 19:35011554-35013255:+      | 0.00074261 | 0.222801293   | 0.197446519     |
| 2057 | GRAMD1A   | ENSG00000089351 | 19:35013368-35013540:+      | 0.00239539 | 0.257414634   | 0.236481081     |
| 2058 | GRAMD1A   | ENSG00000089351 | 19:35022038-35023235:+      | 0.03005301 | 0.16153302    | 0.125911188     |
| 2059 | GRAMD1A   | ENSG00000089351 | 19:35023547-35026048:+      | 3.47E-06   | 0.116745349   | 0.085693199     |
| 2060 | LGI4      | ENSG00000153902 | 19:35125507-35126269:-      | 0.00746492 | 0.139328096   | 0.103382813     |
| 2061 | LGI4      | ENSG00000153902 | 19:35126775-35126852:-      | 0.00189959 | 0.245677238   | 0.177295953     |
| 2062 | LGI4      | ENSG00000153902 | 19:35131555-35131788:-      | 4.89E-06   | 0.113906112   | 0.060534762     |
| 2063 | CTD-2527I | ENSG00000221857 | 19:35142771-35142916:+      | 1.35E-06   | 0.275826717   | 0.181661565     |
| 2064 | TMEM147   | ENSG00000105677 | 19:35545816-35545887:+      | 0.00010428 | 0.110830233   | 0.085339726     |
| 2065 | KMT2B     | ENSG00000272333 | 19:35723502-35723731:+      | 0.00814928 | 0.136316572   | 0.166407832     |
| 2066 | KMT2B     | ENSG00000272333 | 19:35728171-35728773:+      | 0.01198681 | 0.074823199   | 0.094550738     |
| 2067 | U2AF1L4   | ENSG00000161265 | 19:35744145-35744322:-      | 0.00016634 | 0.295110476   | 0.225836282     |
| 2068 | LIN37     | ENSG00000267796 | 19:35754319-35754392:+      | 0.01253284 | 0.188970068   | 0.14998539      |
| 2069 | ARHGAP33  | ENSG00000004777 | 19:35782869-35784171:+      | 0.02051248 | 0.269392524   | 0.305546805     |
| 2070 | ARHGAP33  | ENSG00000004777 | 19:35787072-35787167:+      | 0.03192896 | 0.23283215    | 0.19401203      |
| 2071 | APLP1     | ENSG00000105290 | 19:35878108-35878583:+      | 0.00066888 | 0.132494262   | 0.105447264     |
| 2072 | ALKBH6    | ENSG00000239382 | 19:36011045-36011403:-      | 0.01013703 | 0.292354171   | 0.254687338     |
| 2073 | ALKBH6    | ENSG00000239382 | 19:36011464-36013020:-      | 0.00121046 | 0.238870793   | 0.196351191     |
| 2074 | POLR2I    | ENSG00000105258 | 19:36114412-36114658:-      | 6.73E-07   | 0.097217488   | 0.065238296     |
| 2075 | POLR2I    | ENSG00000105258 | 19:36114713-36114797:-      | 0.00010345 | 0.345860695   | 0.266337558     |
| 2076 | DPF1      | ENSG00000011332 | 19:38216403-38217459:-      | 0.02074747 | 0.235755578   | 0.18467113      |
| 2077 | DPF1      | ENSG00000011332 | 19:38217591-38217797:-      | 3.82E-05   | 0.3975185     | 0.306091634     |
| 2078 | YIF1B     | ENSG00000167645 | 19:38307521-38307596:-      | 0.01996253 | 0.360093598   | 0.311075273     |
| 2079 | FAM98C    | ENSG00000130244 | 19:38403218-38403337:+      | 0.00226705 | 0.469292634   | 0.402103571     |
| 2080 | FAM98C    | ENSG00000130244 | 19:38403694-38404907:+      | 0.00017489 | 0.262818341   | 0.204822979     |
| 2081 | FAM98C    | ENSG00000130244 | 19:38405113-38405343:+      | 1.53E-06   | 0.369945695   | 0.277374286     |
| 2082 | FAM98C    | ENSG00000130244 | 19:38405421-38405518:+      | 8.20E-08   | 0.35745705    | 0.245132017     |
| 2083 | FAM98C    | ENSG00000130244 | 19:38405635-38406909:+      | 1.22E-05   | 0.468973805   | 0.384860312     |
| 2084 | FAM98C    | ENSG00000130244 | 19:38407077-38408750:+      | 1.19E-06   | 0.391516548   | 0.295118468     |
| 2085 | ACTN4     | ENSG00000130402 | 19:38706131-38708116:+      | 0.00034922 | 0.070965287   | 0.099768652     |
| 2086 | ACTN4     | ENSG00000130402 | 19:38727103-38728315:+      | 8.05E-05   | 0.052657222   | 0.042837479     |
| 2087 | HNRNPL    | ENSG00000104824 | 19:38840559-38843841:-      | 0.01900929 | 0.127358049   | 0.156979075     |
| 2088 | SIRT2     | ENSG00000068903 | 19:38893867-38899505:-      | 0.00900795 | 0.238471863   | 0.210516171     |
| 2089 | SAMD4B    | ENSG00000179134 | 19:39383291-39383498:+      | 0.00865601 | 0.552178744   | 0.511602377     |
| 2090 | PAF1      | ENSG00000006712 | 19:39389015-39389092:-      | 0.00095531 | 0.104001667   | 0.081262878     |
| 2091 | SUPT5H    | ENSG00000196235 | 19:39457740-39458293:+      | 0.02066896 | 0.045140178   | 0.072924712     |
| 2092 | SUPT5H    | ENSG00000196235 | 19:39457740-39458817:+      | 6.85E-06   | 0.059039298   | 0.092867149     |
| 2093 | MAP3K10   | ENSG00000130758 | 19:40204633-40205120:+      | 6.73E-06   | 0.082610409   | 0.059485222     |
| 2094 | TTC9B     | ENSG00000174521 | 19:40216272-40217186:-      | 0.00207974 | 0.316879427   | 0.26587754      |
| 2095 | AKT2      | ENSG00000105221 | 19:40236385-40237968:-      | 2.00E-05   | 0.27035653    | 0.222188896     |
| 2096 | AKT2      | ENSG00000105221 | 19:40238973-40240044:-      | 9.98E-05   | 0.344133854   | 0.276489299     |
| 2097 | AKT2      | ENSG00000105221 | 19:40240110-40241937:-      | 0.00601064 | 0.14570128    | 0.119841762     |
| 2098 | SPTBN4    | ENSG00000160460 | 19:40570728-40572018:+      | 0.02053876 | 0.360685009   | 0.403240584     |
| 2099 | SPTBN4    | ENSG00000160460 | 19:40572380-40575410:+      | 0.00101632 | 0.20844206    | 0.160449168     |
| 2100 | ITPKC     | ENSG00000086544 | 19:40737087-40737697:+      | 0.00632448 | 0.117267035   | 0.092423335     |
| 2101 | EGLN2     | ENSG00000269858 | 19:40806674-40807137:+      | 0.0081273  | 0.144160257   | 0.169782808     |
| 2102 | HNRNPUL1  | ENSG00000105323 | 19:41264798-41268222:+      | 0.0061859  | 0.183201252   | 0.156696371     |
| 2103 | HNRNPUL1  | ENSG00000105323 | 19:41304261-41305645:+      | 0.01427177 | 0.020837401   | 0.021103132     |
| 2104 | ARHGEF1   | ENSG00000076928 | 19:41898113-41898441:+      | 0.00017951 | 0.454607317   | 0.540519675     |
| 2105 | ARHGEF1   | ENSG00000076928 | 19:41905036-41905174:+      | 0.00077317 | 0.091643224   | 0.06790743      |
| 2106 | ARHGEF1   | ENSG00000076928 | 19:41905261-41905759:+      | 0.00089796 | 0.093341906   | 0.070145824     |
| 2107 | ERF       | ENSG00000105722 | 19:42249942-42250330:-      | 0.00475688 | 0.210717617   | 0.164359204     |
| 2108 | CIC       | ENSG00000079432 | 19:42294298-42294603:+      | 0.04515089 | 0.041094726   | 0.032042439     |
| 2109 | PAFAH1B3  | ENSG00000079462 | 19:42300092-42300170:-      | 0.00809325 | 0.118712279   | 0.089351244     |

| S/N  | Gene     | Ensembl ID      | Position of retained intron | p-value    | AD_IR_average | Cont_IR_average |
|------|----------|-----------------|-----------------------------|------------|---------------|-----------------|
| 2110 | TMEM145  | ENSG00000167619 | 19:42315440-42316480:+      | 0.03362879 | 0.102027784   | 0.115314473     |
| 2111 | TMEM145  | ENSG00000167619 | 19:42316561-42316661:+      | 0.00525488 | 0.283940699   | 0.23010639      |
| 2112 | MEGF8    | ENSG00000105429 | 19:42361006-42362089:+      | 0.02914353 | 0.125757013   | 0.088085001     |
| 2113 | LIPE     | ENSG00000079435 | 19:42402075-42402606:-      | 0.00569867 | 0.127668151   | 0.103698014     |
| 2114 | LIPE     | ENSG00000079435 | 19:42405561-42406160:-      | 0.01270859 | 0.166660038   | 0.138719114     |
| 2115 | LIPE     | ENSG00000079435 | 19:42408121-42408231:-      | 0.03761502 | 0.098317542   | 0.146117248     |
| 2116 | XRCC1    | ENSG00000073050 | 19:43546106-43546594:-      | 0.02081895 | 0.108310902   | 0.085146439     |
| 2117 | XRCC1    | ENSG00000073050 | 19:43546727-43546883:-      | 0.00059556 | 0.231901355   | 0.179710006     |
| 2118 | XRCC1    | ENSG00000073050 | 19:43551687-43552016:-      | 0.04768473 | 0.182656433   | 0.160999904     |
| 2119 | XRCC1    | ENSG00000073050 | 19:43552908-43552981:-      | 0.01832233 | 0.196357754   | 0.163592836     |
| 2120 | PINLYP   | ENSG00000234465 | 19:43581364-43581562:+      | 0.01903138 | 0.106237733   | 0.082144938     |
| 2121 | SMG9     | ENSG00000105771 | 19:43733733-43734388:-      | 1.16E-06   | 0.116464076   | 0.080124592     |
| 2122 | SMG9     | ENSG00000105771 | 19:43734495-43737596:-      | 4.01E-06   | 0.457148195   | 0.377571455     |
| 2123 | SMG9     | ENSG00000105771 | 19:43737682-43738121:-      | 4.25E-06   | 0.202074555   | 0.153807836     |
| 2124 | CEACAM19 | ENSG00000186567 | 19:44681312-44682566:+      | 0.03355326 | 0.12935728    | 0.105296342     |
| 2125 | TOMM40   | ENSG00000130204 | 19:44901310-44903029:+      | 2.01E-09   | 0.289247012   | 0.203453491     |
| 2126 | CLASRP   | ENSG00000104859 | 19:45052892-45053097:+      | 8.99E-08   | 0.168975817   | 0.106440766     |
| 2127 | PPP1R37  | ENSG00000104866 | 19:45142458-45143520:+      | 0.00099232 | 0.142117504   | 0.109819147     |
| 2128 | PPP1R37  | ENSG00000104866 | 19:45143633-45144853:+      | 0.0113662  | 0.102113127   | 0.082551781     |
| 2129 | PPP1R37  | ENSG00000104866 | 19:45146049-45146389:+      | 0.00288776 | 0.126532348   | 0.088578966     |
| 2130 | ERCC2    | ENSG00000104884 | 19:45357543-45357629:-      | 0.04149918 | 0.089059061   | 0.073398089     |
| 2131 | ERCC1    | ENSG00000012061 | 19:45414034-45414351:-      | 0.03057806 | 0.043862112   | 0.036187204     |
| 2132 | EML2     | ENSG00000125746 | 19:45615889-45616460:-      | 0.00897615 | 0.152615904   | 0.137620792     |
| 2133 | EML2     | ENSG00000125746 | 19:45616558-45616764:-      | 0.03195686 | 0.126999285   | 0.117210248     |
| 2134 | EML2     | ENSG00000125746 | 19:45638634-45638844:-      | 0.03663192 | 0.196191888   | 0.184600097     |
| 2135 | DMPK     | ENSG00000104936 | 19:45771056-45771349:-      | 0.03998165 | 0.134930906   | 0.114910381     |
| 2136 | DMPK     | ENSG00000104936 | 19:45778641-45779263:-      | 2.62E-05   | 0.297809805   | 0.223013571     |
| 2137 | SYMPK    | ENSG00000125755 | 19:45823875-45825170:-      | 1.04E-09   | 0.242370866   | 0.15118239      |
| 2138 | SYMPK    | ENSG00000125755 | 19:45827918-45828969:-      | 0.0185135  | 0.102284491   | 0.082075504     |
| 2139 | SYMPK    | ENSG00000125755 | 19:45854507-45863057:-      | 0.04583157 | 0.122751605   | 0.144391414     |
| 2140 | NOVA2    | ENSG00000104967 | 19:45961153-45973266:-      | 0.00277575 | 0.089875572   | 0.118213429     |
| 2141 | CCDC61   | ENSG00000104983 | 19:46003501-46006558:+      | 0.0320811  | 0.144906096   | 0.119464342     |
| 2142 | STRN4    | ENSG00000090372 | 19:46720771-46721985:-      | 0.00504949 | 0.110300876   | 0.092748801     |
| 2143 | STRN4    | ENSG00000090372 | 19:46722072-46722241:-      | 0.04835612 | 0.123562785   | 0.110298539     |
| 2144 | BBC3     | ENSG00000105327 | 19:47221918-47226563:-      | 0.00369334 | 0.12513909    | 0.091929821     |
| 2145 | DHX34    | ENSG00000134815 | 19:47380992-47381185:+      | 1.03E-05   | 0.486423451   | 0.397056143     |
| 2146 | DHX34    | ENSG00000134815 | 19:47381324-47381979:+      | 0.00397193 | 0.554942012   | 0.486206182     |
| 2147 | MEIS3    | ENSG00000105419 | 19:47406526-47406887:-      | 0.02274719 | 0.179194622   | 0.144754148     |
| 2148 | KPTN     | ENSG00000118162 | 19:47480407-47480759:-      | 0.00210743 | 0.674387293   | 0.613351818     |
| 2149 | NAPA     | ENSG00000105402 | 19:47492119-47492960:-      | 0.03371602 | 0.108946633   | 0.096371031     |
| 2150 | GLTSCR1  | ENSG00000063169 | 19:47695474-47696450:+      | 0.03630635 | 0.139920243   | 0.116995179     |
| 2151 | LIG1     | ENSG00000105486 | 19:48136125-48137007:-      | 0.00693054 | 0.112900506   | 0.086644092     |
| 2152 | SPHK2    | ENSG00000063176 | 19:48626362-48627691:+      | 0.0064872  | 0.293979171   | 0.244317091     |
| 2153 | SPHK2    | ENSG00000063176 | 19:48628069-48628161:+      | 0.01150385 | 0.09518589    | 0.070223262     |
| 2154 | CA11     | ENSG00000063180 | 19:48638144-48638887:-      | 0.00815371 | 0.177806394   | 0.147902042     |
| 2155 | CA11     | ENSG00000063180 | 19:48644569-48645402:-      | 0.00087838 | 0.186637122   | 0.146588721     |
| 2156 | MAMSTR   | ENSG00000176909 | 19:48713770-48713859:-      | 0.01455706 | 0.252630204   | 0.207659488     |
| 2157 | BCAT2    | ENSG00000105552 | 19:48800100-48800186:-      | 0.00031628 | 0.107973924   | 0.066367167     |
| 2158 | BCAT2    | ENSG00000105552 | 19:48800297-48806516:-      | 5.51E-06   | 0.239535867   | 0.172995119     |
| 2159 | BCAT2    | ENSG00000105552 | 19:48806717-48806999:-      | 0.03026142 | 0.136022441   | 0.114298268     |
| 2160 | BCAT2    | ENSG00000105552 | 19:48807074-48807755:-      | 0.00066876 | 0.403372012   | 0.408738636     |
| 2161 | PPP1R15A | ENSG00000087074 | 19:48872651-48873224:+      | 2.95E-08   | 0.047069386   | 0.031083362     |
| 2162 | PPP1R15A | ENSG00000087074 | 19:48874898-48875613:+      | 3.56E-09   | 0.098395294   | 0.067415483     |
| 2163 | BAX      | ENSG00000087088 | 19:48955599-48955686:+      | 0.01812377 | 0.29271121    | 0.275678935     |
| 2164 | GYS1     | ENSG00000104812 | 19:48970709-48970927:-      | 0.00030617 | 0.213316289   | 0.137103418     |
| 2165 | GYS1     | ENSG00000104812 | 19:48982375-48982719:-      | 0.00755574 | 0.223967018   | 0.185471735     |
| 2166 | GYS1     | ENSG00000104812 | 19:48982837-48985460:-      | 0.02452616 | 0.257730583   | 0.23317401      |



| S/N  | Gene      | Ensembl ID      | Position of retained intron | p-value    | AD_IR_average | Cont_IR_average |
|------|-----------|-----------------|-----------------------------|------------|---------------|-----------------|
| 2167 | GYS1      | ENSG00000104812 | 19:48985605-48985849:-      | 0.02568912 | 0.147221605   | 0.117145755     |
| 2168 | LIN7B     | ENSG00000104863 | 19:49114441-49114848:+      | 0.00776747 | 0.159314491   | 0.125749649     |
| 2169 | LIN7B     | ENSG00000104863 | 19:49114967-49115259:+      | 0.00029696 | 0.119709745   | 0.082735971     |
| 2170 | PPFIA3    | ENSG00000177380 | 19:49143004-49145942:+      | 0.01877882 | 0.123394023   | 0.100622231     |
| 2171 | PPFIA3    | ENSG00000177380 | 19:49149718-49150079:+      | 0.01339147 | 0.105780799   | 0.088826656     |
| 2172 | PIH1D1    | ENSG00000104872 | 19:49447099-49447337:-      | 2.94E-06   | 0.273871207   | 0.200497622     |
| 2173 | PIH1D1    | ENSG00000104872 | 19:49447467-49447826:-      | 1.97E-06   | 0.212519666   | 0.153036335     |
| 2174 | PIH1D1    | ENSG00000104872 | 19:49447908-49448000:-      | 0.0361826  | 0.278306817   | 0.252664432     |
| 2175 | RRAS      | ENSG00000126458 | 19:49635660-49635733:-      | 0.00731251 | 0.156293105   | 0.108235813     |
| 2176 | RRAS      | ENSG00000126458 | 19:49635852-49636618:-      | 0.00312267 | 0.104095847   | 0.07181004      |
| 2177 | IRF3      | ENSG00000126456 | 19:49659833-49660712:-      | 1.60E-05   | 0.120282523   | 0.08886261      |
| 2178 | PRMT1     | ENSG00000126457 | 19:49686726-49688161:+      | 0.01725878 | 0.227260161   | 0.184266021     |
| 2179 | CPT1C     | ENSG00000169169 | 19:49710484-49710722:+      | 1.74E-05   | 0.424916561   | 0.340306312     |
| 2180 | CPT1C     | ENSG00000169169 | 19:49710857-49711808:+      | 4.56E-11   | 0.578316024   | 0.446555844     |
| 2181 | AP2A1     | ENSG00000196961 | 19:49798952-49799326:+      | 0.00997105 | 0.198982172   | 0.176615775     |
| 2182 | MED25     | ENSG00000104973 | 19:49832415-49834985:+      | 0.00271105 | 0.139712649   | 0.113377574     |
| 2183 | PTOV1     | ENSG00000104960 | 19:49855077-49856974:+      | 0.00068963 | 0.531420939   | 0.456043312     |
| 2184 | PNKP      | ENSG0000039650  | 19:49861365-49861448:-      | 0.02249332 | 0.438925976   | 0.361167662     |
| 2185 | PNKP      | ENSG0000039650  | 19:49864236-49864323:-      | 0.00124284 | 0.614349085   | 0.535317195     |
| 2186 | AKT1S1    | ENSG00000204673 | 19:49870060-49871546:-      | 0.00849891 | 0.146558796   | 0.123997265     |
| 2187 | AKT1S1    | ENSG00000204673 | 19:49871889-49872916:-      | 0.00238538 | 0.118649099   | 0.093146292     |
| 2188 | TBC1D17   | ENSG00000104946 | 19:49878572-49880278:+      | 0.00185894 | 0.269675317   | 0.229880727     |
| 2189 | VRK3      | ENSG00000105053 | 19:49976784-49979082:-      | 0.00100204 | 0.211698496   | 0.160685582     |
| 2190 | VRK3      | ENSG00000105053 | 19:49988492-49989638:-      | 0.00015207 | 0.119181332   | 0.087717604     |
| 2191 | MYH14     | ENSG00000105357 | 19:50281842-50286481:+      | 0.00237934 | 0.146165943   | 0.114989147     |
| 2192 | MYH14     | ENSG00000105357 | 19:50309177-50309639:+      | 0.00186846 | 0.099478541   | 0.071100088     |
| 2193 | KCNC3     | ENSG00000131398 | 19:50320349-50320592:-      | 0.00121544 | 0.142110695   | 0.10804271      |
| 2194 | CTD-2545N | ENSG00000142539 | 19:50415826-50416395:+      | 0.00628016 | 0.410370683   | 0.346062638     |
| 2195 | ASPDH     | ENSG00000204653 | 19:50511773-50512135:-      | 0.00011563 | 0.519615744   | 0.418095909     |
| 2196 | C19orf81  | ENSG00000235034 | 19:50658608-50658946:+      | 0.00420813 | 0.361986512   | 0.298927506     |
| 2197 | SPACA6    | ENSG00000182310 | 19:51694555-51701657:+      | 9.84E-06   | 0.389262284   | 0.302294651     |
| 2198 | SPACA6    | ENSG00000182310 | 19:51701726-51702628:+      | 7.32E-05   | 0.380111951   | 0.308956355     |
| 2199 | SPACA6    | ENSG00000182310 | 19:51702652-51703020:+      | 1.33E-06   | 0.448573293   | 0.369925532     |
| 2200 | SPACA6    | ENSG00000182310 | 19:51703098-51703227:+      | 0.01095173 | 0.276338622   | 0.235494306     |
| 2201 | SPACA6    | ENSG00000182310 | 19:51703337-51704029:+      | 2.77E-05   | 0.209585273   | 0.176518127     |
| 2202 | SPACA6    | ENSG00000182310 | 19:51704186-51704269:+      | 0.0014222  | 0.261530528   | 0.206369116     |
| 2203 | SPACA6    | ENSG00000182310 | 19:51704480-51705089:+      | 1.22E-05   | 0.287428362   | 0.214066142     |
| 2204 | AC074141  | ENSG00000283617 | 19:51877377-51878388:-      | 0.02325105 | 0.091983174   | 0.074062891     |
| 2205 | AC074141  | ENSG00000283617 | 19:51878515-51880322:-      | 0.00271183 | 0.153663373   | 0.121236108     |
| 2206 | CACNG7    | ENSG00000105605 | 19:53914586-53915364:+      | 0.0018799  | 0.160697661   | 0.133236906     |
| 2207 | TFPT      | ENSG00000105619 | 19:54108244-54108325:-      | 0.00529168 | 0.173293576   | 0.140988444     |
| 2208 | TFPT      | ENSG00000105619 | 19:54110121-54114441:-      | 0.04443632 | 0.15335883    | 0.133572905     |
| 2209 | TFPT      | ENSG00000105619 | 19:54114700-54115246:-      | 0.01439291 | 0.246353321   | 0.211297687     |
| 2210 | PRPF31    | ENSG00000105618 | 19:54128377-54129056:+      | 0.00378452 | 0.113980309   | 0.092723327     |
| 2211 | CNOT3     | ENSG00000088038 | 19:54143749-54144005:+      | 0.00237077 | 0.120177618   | 0.093848666     |
| 2212 | CNOT3     | ENSG00000088038 | 19:54145817-54145909:+      | 0.00492951 | 0.114544006   | 0.085711858     |
| 2213 | PPP1R12C  | ENSG00000125503 | 19:55095940-55096050:-      | 7.50E-08   | 0.118935577   | 0.07283323      |
| 2214 | PPP1R12C  | ENSG00000125503 | 19:55096178-55096261:-      | 0.02705596 | 0.077146713   | 0.078023621     |
| 2215 | PPP6R1    | ENSG00000105063 | 19:55240300-55240944:-      | 0.00019945 | 0.140225634   | 0.098122081     |
| 2216 | PPP6R1    | ENSG00000105063 | 19:55241391-55241476:-      | 4.24E-06   | 0.300192251   | 0.182984758     |
| 2217 | KMT5C     | ENSG00000133247 | 19:55342851-55343679:+      | 0.00979765 | 0.300073226   | 0.336006701     |
| 2218 | KMT5C     | ENSG00000133247 | 19:55343843-55343977:+      | 0.0213555  | 0.108012898   | 0.085110397     |
| 2219 | ISOC2     | ENSG00000063241 | 19:55455330-55455635:-      | 0.00052732 | 0.113271645   | 0.091292832     |
| 2220 | NAT14     | ENSG00000090971 | 19:55485780-55486407:+      | 9.00E-05   | 0.370286793   | 0.297380152     |
| 2221 | ZSCAN18   | ENSG00000121413 | 19:58085376-58086173:-      | 5.56E-05   | 0.146581804   | 0.2066198       |
| 2222 | ZSCAN18   | ENSG00000121413 | 19:58086266-58086905:-      | 0.00167668 | 0.23017604    | 0.201618904     |
| 2223 | ZSCAN18   | ENSG00000121413 | 19:58087008-58087315:-      | 5.25E-05   | 0.158792705   | 0.122064823     |

| S/N  | Gene     | Ensembl ID      | Position of retained intron | p-value    | AD_IR_average | Cont_IR_average |
|------|----------|-----------------|-----------------------------|------------|---------------|-----------------|
| 2224 | A1BG     | ENSG00000121410 | 19:58347029-58347352:-      | 0.0185622  | 0.124352012   | 0.098988388     |
| 2225 | ZBTB45   | ENSG00000119574 | 19:58514310-58516394:-      | 1.34E-05   | 0.230677196   | 0.15940114      |
| 2226 | TRIM28   | ENSG00000130726 | 19:58545537-58545763:+      | 0.00079881 | 0.102260563   | 0.076349351     |
| 2227 | TRIM28   | ENSG00000130726 | 19:58545896-58547375:+      | 0.01306454 | 0.134603439   | 0.120100782     |
| 2228 | TRAPPC12 | ENSG00000171853 | 2:3443891-3457620:+         | 0.01497159 | 0.107448869   | 0.083147903     |
| 2229 | TRAPPC12 | ENSG00000171853 | 2:3477795-3478845:+         | 0.00801479 | 0.277581123   | 0.241967701     |
| 2230 | TRAPPC12 | ENSG00000171853 | 2:3478933-3479218:+         | 8.15E-10   | 0.16283819    | 0.105696822     |
| 2231 | ITGB1BP1 | ENSG00000119185 | 2:9414256-9418625:-         | 0.00911892 | 0.095751091   | 0.077229955     |
| 2232 | CPSF3    | ENSG00000119203 | 2:9467776-9471342:+         | 0.01103651 | 0.109239021   | 0.088155351     |
| 2233 | DDX1     | ENSG00000079785 | 2:15627145-15628444:+       | 0.00239117 | 0.128252744   | 0.091351515     |
| 2234 | DDX1     | ENSG00000079785 | 2:15628517-15628637:+       | 0.02017142 | 0.175661049   | 0.148578705     |
| 2235 | DDX1     | ENSG00000079785 | 2:15628710-15628796:+       | 0.03098834 | 0.15642329    | 0.136497768     |
| 2236 | FKBP1B   | ENSG00000119782 | 2:24049886-24053901:+       | 9.24E-05   | 0.155093267   | 0.108020692     |
| 2237 | ADCY3    | ENSG00000138031 | 2:24820114-24820723:-       | 0.01889713 | 0.346950439   | 0.312947974     |
| 2238 | ADCY3    | ENSG00000138031 | 2:24827608-24827901:-       | 0.03607719 | 0.167271699   | 0.142289801     |
| 2239 | DNMT3A   | ENSG00000119772 | 2:25239215-25240301:-       | 0.01060154 | 0.210844362   | 0.178751783     |
| 2240 | DTNB     | ENSG00000138101 | 2:25379323-25383835:-       | 6.52E-05   | 0.048572636   | 0.034286828     |
| 2241 | DPYSL5   | ENSG00000157851 | 2:26934734-26940030:+       | 0.00188532 | 0.168095885   | 0.147153445     |
| 2242 | AGBL5    | ENSG00000084693 | 2:27056792-27057302:+       | 0.01826153 | 0.319484683   | 0.272027147     |
| 2243 | AGBL5    | ENSG00000084693 | 2:27057438-27058399:+       | 0.00690418 | 0.300407873   | 0.250958314     |
| 2244 | AGBL5    | ENSG00000084693 | 2:27058602-27059189:+       | 6.86E-06   | 0.188128524   | 0.131056066     |
| 2245 | AGBL5    | ENSG00000084693 | 2:27067646-27068631:+       | 0.00025957 | 0.581538171   | 0.502321532     |
| 2246 | KHK      | ENSG00000138030 | 2:27099284-27099419:+       | 0.00686027 | 0.398563951   | 0.461961273     |
| 2247 | CGREF1   | ENSG00000138028 | 2:27102591-27104286:-       | 0.02080455 | 0.15515434    | 0.121557738     |
| 2248 | PREB     | ENSG00000138073 | 2:27133337-27133531:-       | 0.01420941 | 0.31993022    | 0.378293831     |
| 2249 | SLC5A6   | ENSG00000138074 | 2:27201453-27201665:-       | 0.00138082 | 0.213716978   | 0.172985129     |
| 2250 | MPV17    | ENSG00000115204 | 2:27311951-27312213:-       | 2.45E-05   | 0.336435179   | 0.266881338     |
| 2251 | MPV17    | ENSG00000115204 | 2:27312246-27312493:-       | 0.00623811 | 0.394873707   | 0.362726935     |
| 2252 | GTF3C2   | ENSG00000115207 | 2:27328189-27328467:-       | 0.01503408 | 0.164839709   | 0.199990795     |
| 2253 | IFT172   | ENSG00000138002 | 2:27444521-27445013:-       | 0.00116588 | 0.113557039   | 0.084218691     |
| 2254 | IFT172   | ENSG00000138002 | 2:27445843-27445928:-       | 0.01526745 | 0.102188811   | 0.085798486     |
| 2255 | IFT172   | ENSG00000138002 | 2:27447634-27447811:-       | 0.00038856 | 0.086805083   | 0.066848153     |
| 2256 | IFT172   | ENSG00000138002 | 2:27449031-27449293:-       | 0.03938347 | 0.11271012    | 0.09712651      |
| 2257 | SLC4A1AP | ENSG00000163798 | 2:27688020-27688699:+       | 0.00232151 | 0.115818915   | 0.097004694     |
| 2258 | TTC27    | ENSG00000018699 | 2:32812615-32817456:+       | 7.10E-08   | 0.14167999    | 0.077299408     |
| 2259 | CEBPZ    | ENSG00000115816 | 2:37202865-37202949:-       | 0.00655168 | 0.366908537   | 0.410200442     |
| 2260 | CEBPZ    | ENSG00000115816 | 2:37212392-37213863:-       | 0.00026344 | 0.135479273   | 0.096473794     |
| 2261 | CEBPZ    | ENSG00000115816 | 2:37214952-37216139:-       | 5.97E-05   | 0.096683943   | 0.144733344     |
| 2262 | SRSF7    | ENSG00000115875 | 2:38745187-38746693:-       | 1.19E-06   | 0.027044815   | 0.023122795     |
| 2263 | MAP4K3   | ENSG00000011566 | 2:39258587-39260605:-       | 5.88E-07   | 0.090030817   | 0.046704757     |
| 2264 | DYNC2L1  | ENSG00000138036 | 2:43805246-43809704:+       | 1.12E-08   | 0.175204963   | 0.096287616     |
| 2265 | TTC7A    | ENSG00000068724 | 2:46994514-46995135:+       | 0.01353317 | 0.093557423   | 0.070914099     |
| 2266 | TTC7A    | ENSG00000068724 | 2:47024359-47029223:+       | 0.00596771 | 0.092266565   | 0.067066672     |
| 2267 | MSH2     | ENSG00000095002 | 2:47480871-47482778:+       | 0.00274782 | 0.212312502   | 0.173236122     |
| 2268 | MSH6     | ENSG00000116062 | 2:47801155-47803419:+       | 0.00649065 | 0.206664854   | 0.26645626      |
| 2269 | MSH6     | ENSG00000116062 | 2:47806651-47806778:+       | 0.03681097 | 0.114564045   | 0.094209079     |
| 2270 | RPS27A   | ENSG00000143947 | 2:55232708-55232807:+       | 0.00035236 | 0.113509999   | 0.076071112     |
| 2271 | AHSA2    | ENSG00000173209 | 2:61184800-61185501:+       | 0.00119345 | 0.13611986    | 0.103626821     |
| 2272 | AHSA2    | ENSG00000173209 | 2:61186497-61186616:+       | 0.0029077  | 0.20725223    | 0.174690301     |
| 2273 | USP34    | ENSG00000115464 | 2:61189069-61190270:-       | 0.04144787 | 0.290642037   | 0.316602351     |
| 2274 | USP34    | ENSG00000115464 | 2:61190414-61190517:-       | 8.87E-07   | 0.337978012   | 0.420826208     |
| 2275 | USP34    | ENSG00000115464 | 2:61190658-61192900:-       | 0.00033159 | 0.09832427    | 0.065606284     |
| 2276 | USP34    | ENSG00000115464 | 2:61192980-61203139:-       | 0.00152428 | 0.095892321   | 0.093589431     |
| 2277 | ETAA1    | ENSG00000143971 | 2:67405335-67409910:+       | 0.01609603 | 0.138268645   | 0.099859066     |
| 2278 | TIA1     | ENSG00000116001 | 2:70216292-70216403:-       | 0.00036073 | 0.131285979   | 0.094737585     |
| 2279 | TIA1     | ENSG00000116001 | 2:70216994-70224553:-       | 0.02185877 | 0.123191548   | 0.107864684     |
| 2280 | AC007040 | ENSG00000258881 | 2:70989816-70991829:-       | 0.00210231 | 0.194819741   | 0.164346735     |

| S/N  | Gene    | Ensembl ID      | Position of retained intron | p-value    | AD_IR_average | Cont_IR_average |
|------|---------|-----------------|-----------------------------|------------|---------------|-----------------|
| 2281 | NAGK    | ENSG00000124357 | 2:71068712-71070501:+       | 6.96E-06   | 0.272542451   | 0.236161694     |
| 2282 | NAGK    | ENSG00000124357 | 2:71070586-71070740:+       | 1.12E-05   | 0.257429695   | 0.209082735     |
| 2283 | ZNF638  | ENSG00000075292 | 2:71427414-71431326:+       | 0.01126245 | 0.04663142    | 0.040481502     |
| 2284 | SFXN5   | ENSG00000144040 | 2:72961248-72968447:-       | 0.01118229 | 0.090646298   | 0.066957919     |
| 2285 | SMYD5   | ENSG00000135632 | 2:73223106-73223425:+       | 0.00992852 | 0.097390861   | 0.078549436     |
| 2286 | SMYD5   | ENSG00000135632 | 2:73223532-73223946:+       | 1.44E-05   | 0.143950241   | 0.096685027     |
| 2287 | SMYD5   | ENSG00000135632 | 2:73224003-73224865:+       | 0.00338529 | 0.13109496    | 0.104083497     |
| 2288 | SMYD5   | ENSG00000135632 | 2:73225701-73225795:+       | 0.02213703 | 0.133763627   | 0.108881742     |
| 2289 | PRADC1  | ENSG00000135617 | 2:73228574-73228794:-       | 0.04733453 | 0.118340434   | 0.099435096     |
| 2290 | PRADC1  | ENSG00000135617 | 2:73228962-73229460:-       | 0.00017686 | 0.12082899    | 0.090856318     |
| 2291 | PRADC1  | ENSG00000135617 | 2:73229570-73230112:-       | 0.00015379 | 0.106702323   | 0.076983953     |
| 2292 | TPRKB   | ENSG00000144034 | 2:73730029-73730559:-       | 1.33E-05   | 0.179532477   | 0.130446956     |
| 2293 | TPRKB   | ENSG00000144034 | 2:73730736-73732162:-       | 4.62E-06   | 0.167551356   | 0.121380722     |
| 2294 | TPRKB   | ENSG00000144034 | 2:73732285-73732583:-       | 0.0327036  | 0.057912663   | 0.053352468     |
| 2295 | DGUOK   | ENSG00000114956 | 2:73950732-73958145:+       | 0.00054248 | 0.045215148   | 0.033870327     |
| 2296 | DCTN1   | ENSG00000204843 | 2:74365241-74365514:-       | 0.00015491 | 0.160145294   | 0.129131555     |
| 2297 | WDR54   | ENSG00000005448 | 2:74425237-74425416:+       | 0.00208236 | 0.106425239   | 0.080914624     |
| 2298 | WDR54   | ENSG00000005448 | 2:74425491-74425569:+       | 0.0038799  | 0.105107759   | 0.078909081     |
| 2299 | RTKN    | ENSG00000114993 | 2:74428737-74428847:-       | 0.04859506 | 0.132849446   | 0.114082534     |
| 2300 | TTC31   | ENSG00000115282 | 2:74490473-74490655:+       | 0.02661684 | 0.115821543   | 0.145157326     |
| 2301 | PCGF1   | ENSG00000115289 | 2:74507147-74507575:-       | 2.12E-08   | 0.421662878   | 0.297439221     |
| 2302 | AUP1    | ENSG00000115307 | 2:74528321-74528416:-       | 2.35E-06   | 0.174993766   | 0.143242414     |
| 2303 | AUP1    | ENSG00000115307 | 2:74528935-74529131:-       | 0.00025899 | 0.659754878   | 0.595326286     |
| 2304 | AUP1    | ENSG00000115307 | 2:74529282-74529361:-       | 0.00287667 | 0.127052648   | 0.095645736     |
| 2305 | HTRA2   | ENSG00000115317 | 2:74531702-74531855:+       | 0.00020666 | 0.1826244     | 0.147464566     |
| 2306 | HTRA2   | ENSG00000115317 | 2:74531925-74532618:+       | 0.00036085 | 0.084428111   | 0.066114829     |
| 2307 | GCFC2   | ENSG00000005436 | 2:75664783-75665928:-       | 4.02E-08   | 0.337988256   | 0.242283374     |
| 2308 | GCFC2   | ENSG00000005436 | 2:75666053-75670137:-       | 1.55E-05   | 0.327296654   | 0.247713003     |
| 2309 | GCFC2   | ENSG00000005436 | 2:75670284-75671949:-       | 0.00032039 | 0.369738037   | 0.310303714     |
| 2310 | GCFC2   | ENSG00000005436 | 2:75672016-75673443:-       | 0.00070472 | 0.342724122   | 0.283364419     |
| 2311 | ELMOD3  | ENSG00000115459 | 2:85377474-85389750:+       | 0.0023849  | 0.186693954   | 0.142389088     |
| 2312 | ELMOD3  | ENSG00000115459 | 2:85389827-85390137:+       | 0.02196392 | 0.163845989   | 0.147824903     |
| 2313 | ELMOD3  | ENSG00000115459 | 2:85390265-85390759:+       | 0.00465732 | 0.380035024   | 0.328813364     |
| 2314 | GGCX    | ENSG00000115486 | 2:85550126-85550554:-       | 4.54E-05   | 0.130791123   | 0.082774428     |
| 2315 | GGCX    | ENSG00000115486 | 2:85550750-85550924:-       | 0.00048159 | 0.253997118   | 0.190415787     |
| 2316 | GGCX    | ENSG00000115486 | 2:85551072-85551479:-       | 0.00013342 | 0.132467457   | 0.092503997     |
| 2317 | TMEM150 | ENSG00000168890 | 2:85599317-85599524:-       | 0.04476751 | 0.172536245   | 0.148221075     |
| 2318 | C2orf68 | ENSG00000168887 | 2:85609067-85609434:-       | 0.02857298 | 0.545938585   | 0.589134364     |
| 2319 | PTCD3   | ENSG00000132300 | 2:86130737-86131077:+       | 0.00084522 | 0.208789283   | 0.14453086      |
| 2320 | PTCD3   | ENSG00000132300 | 2:86131106-86132317:+       | 0.0098566  | 0.114437637   | 0.090977921     |
| 2321 | PTCD3   | ENSG00000132300 | 2:86132424-86133177:+       | 0.01268294 | 0.221644284   | 0.172398747     |
| 2322 | PTCD3   | ENSG00000132300 | 2:86136562-86136981:+       | 3.26E-05   | 0.134142779   | 0.188762391     |
| 2323 | KDM3A   | ENSG00000115548 | 2:86482102-86482457:+       | 8.72E-05   | 0.235044712   | 0.334147297     |
| 2324 | KDM3A   | ENSG00000115548 | 2:86482694-86483986:+       | 0.0205927  | 0.212890143   | 0.265281574     |
| 2325 | KDM3A   | ENSG00000115548 | 2:86489437-86489519:+       | 0.01753034 | 0.125353618   | 0.100863401     |
| 2326 | MRPS5   | ENSG00000144029 | 2:95101723-95104639:-       | 0.00093395 | 0.420231159   | 0.333969091     |
| 2327 | FAHD2A  | ENSG00000115042 | 2:95407157-95410526:+       | 0.030408   | 0.270735878   | 0.222595343     |
| 2328 | FAHD2A  | ENSG00000115042 | 2:95412542-95412676:+       | 0.01059516 | 0.647133122   | 0.600404338     |
| 2329 | ANKRD23 | ENSG00000163126 | 2:96840095-96840231:-       | 0.02463696 | 0.247700332   | 0.208846122     |
| 2330 | SEMA4C  | ENSG00000168758 | 2:96861455-96861578:-       | 0.04920092 | 0.084687991   | 0.099202578     |
| 2331 | SEMA4C  | ENSG00000168758 | 2:96861894-96863681:-       | 0.01178852 | 0.148911726   | 0.178699243     |
| 2332 | SEMA4C  | ENSG00000168758 | 2:96867923-96869875:-       | 0.01114583 | 0.215023782   | 0.251970109     |
| 2333 | ACTR1B  | ENSG00000115073 | 2:97656960-97657151:-       | 1.31E-05   | 0.26851263    | 0.190362117     |
| 2334 | ACTR1B  | ENSG00000115073 | 2:97658643-97658878:-       | 0.00670175 | 0.421881354   | 0.357342325     |
| 2335 | ACTR1B  | ENSG00000115073 | 2:97659477-97660570:-       | 0.03939584 | 0.195165094   | 0.177497534     |
| 2336 | ACTR1B  | ENSG00000115073 | 2:97660646-97661881:-       | 0.00281611 | 0.221237473   | 0.176301721     |
| 2337 | ACTR1B  | ENSG00000115073 | 2:97661946-97663842:-       | 9.12E-05   | 0.417140856   | 0.322050078     |

| S/N  | Gene    | Ensembl ID      | Position of retained intron | p-value    | AD_IR_average | Cont_IR_average |
|------|---------|-----------------|-----------------------------|------------|---------------|-----------------|
| 2338 | TMEM131 | ENSG00000075568 | 2:97772424-97775842:-       | 0.0480963  | 0.104132549   | 0.087044029     |
| 2339 | MITD1   | ENSG00000158411 | 2:99170652-99171342:-       | 0.00011993 | 0.202588362   | 0.166223552     |
| 2340 | MITD1   | ENSG00000158411 | 2:99171429-99171509:-       | 6.48E-05   | 0.34259298    | 0.277134312     |
| 2341 | REV1    | ENSG00000135945 | 2:99402346-99402643:-       | 0.00439964 | 0.29250222    | 0.23594883      |
| 2342 | REV1    | ENSG00000135945 | 2:99406106-99406324:-       | 0.00035814 | 0.100006843   | 0.148410308     |
| 2343 | CNOT11  | ENSG00000158435 | 2:101266879-101269039:+     | 0.01301359 | 0.147355227   | 0.12376894      |
| 2344 | RNF149  | ENSG00000163162 | 2:101277281-101281858:-     | 0.00964888 | 0.105944756   | 0.086763981     |
| 2345 | RNF149  | ENSG00000163162 | 2:101282057-101286080:-     | 0.03627081 | 0.166802099   | 0.143345068     |
| 2346 | MAP4K4  | ENSG00000071054 | 2:101864051-101864929:+     | 0.04655925 | 0.0869793     | 0.086185011     |
| 2347 | MAP4K4  | ENSG00000071054 | 2:101869797-101870294:+     | 0.00080962 | 0.159725554   | 0.117404449     |
| 2348 | UXS1    | ENSG00000115652 | 2:106096821-106098715:-     | 0.03258847 | 0.087946516   | 0.07731673      |
| 2349 | UXS1    | ENSG00000115652 | 2:106098773-106101057:-     | 0.01934066 | 0.107104288   | 0.092397249     |
| 2350 | BIN1    | ENSG00000136717 | 2:127050912-127051153:-     | 0.01283163 | 0.152502595   | 0.120112        |
| 2351 | BIN1    | ENSG00000136717 | 2:127051243-127059010:-     | 0.00015828 | 0.242461976   | 0.215224948     |
| 2352 | BIN1    | ENSG00000136717 | 2:127064018-127068162:-     | 0.04974669 | 0.083618116   | 0.063195123     |
| 2353 | BIN1    | ENSG00000136717 | 2:127064018-127068923:-     | 3.65E-05   | 0.077574386   | 0.058523827     |
| 2354 | WDR33   | ENSG00000136709 | 2:127709856-127713582:-     | 0.00257919 | 0.086019754   | 0.106529714     |
| 2355 | SMPD4   | ENSG00000136699 | 2:130153935-130154276:-     | 0.00587878 | 0.099705605   | 0.125149992     |
| 2356 | MZT2B   | ENSG00000152082 | 2:130182452-130190468:+     | 9.29E-05   | 0.032967274   | 0.025793404     |
| 2357 | MZT2B   | ENSG00000152082 | 2:130183966-130190468:+     | 8.06E-05   | 0.030891906   | 0.024270385     |
| 2358 | PTPN18  | ENSG00000072135 | 2:130359492-130359607:+     | 0.01201679 | 0.240367313   | 0.2030558       |
| 2359 | ARHGEF4 | ENSG00000136002 | 2:131040440-131041229:+     | 0.00618753 | 0.213019101   | 0.176423938     |
| 2360 | ARHGEF4 | ENSG00000136002 | 2:131045446-131046037:+     | 0.01277052 | 0.319258963   | 0.272528662     |
| 2361 | MZT2A   | ENSG00000173272 | 2:131492024-131492206:-     | 0.00035282 | 0.200117005   | 0.143423292     |
| 2362 | UBXN4   | ENSG00000144224 | 2:135742011-135748266:+     | 0.0275804  | 0.115887579   | 0.097691834     |
| 2363 | ORC4    | ENSG00000115947 | 2:147938213-147938297:-     | 0.009432   | 0.132664289   | 0.098815069     |
| 2364 | FMNL2   | ENSG00000157827 | 2:152575244-152578887:+     | 0.04139455 | 0.081827912   | 0.11077033      |
| 2365 | WDSUB1  | ENSG00000196151 | 2:159236190-159248371:-     | 0.0028825  | 0.297584727   | 0.244501826     |
| 2366 | BAZ2B   | ENSG00000123636 | 2:159320418-159324810:-     | 0.00846719 | 0.274221554   | 0.201727012     |
| 2367 | FASTKD1 | ENSG00000138399 | 2:169537340-169538012:-     | 0.02903925 | 0.08175625    | 0.084877008     |
| 2368 | OSBPL6  | ENSG00000079156 | 2:178394435-178395450:+     | 0.00077351 | 0.1091876     | 0.074926545     |
| 2369 | PRKRA   | ENSG00000180228 | 2:178432254-178436144:-     | 0.001936   | 0.099721918   | 0.078377313     |
| 2370 | PRKRA   | ENSG00000180228 | 2:178436319-178441609:-     | 0.00225454 | 0.157766344   | 0.122485645     |
| 2371 | SSFA2   | ENSG00000138434 | 2:181892660-181896029:+     | 0.00403589 | 0.124765323   | 0.092185169     |
| 2372 | WDR75   | ENSG00000115368 | 2:189468569-189469343:+     | 4.61E-09   | 0.096475441   | 0.056887441     |
| 2373 | WDR75   | ENSG00000115368 | 2:189469439-189470075:+     | 0.04646943 | 0.160942455   | 0.139322901     |
| 2374 | OSGEPL1 | ENSG00000128694 | 2:189750656-189752652:-     | 0.04091493 | 0.169129773   | 0.142031995     |
| 2375 | HIBCH   | ENSG00000198130 | 2:190205232-190208879:-     | 0.0144548  | 0.172439632   | 0.140158366     |
| 2376 | HIBCH   | ENSG00000198130 | 2:190208913-190212955:-     | 0.00918396 | 0.094223391   | 0.073516088     |
| 2377 | HIBCH   | ENSG00000198130 | 2:190249726-190252161:-     | 0.00010828 | 0.083736067   | 0.04905475      |
| 2378 | SF3B1   | ENSG00000115524 | 2:197398581-197398968:-     | 0.00184984 | 0.008608908   | 0.007277096     |
| 2379 | HSPE1   | ENSG00000115541 | 2:197503128-197503208:+     | 0.01272708 | 0.139808323   | 0.115375901     |
| 2380 | CLK1    | ENSG00000013441 | 2:200859746-200860124:-     | 2.08E-06   | 0.633881122   | 0.717176714     |
| 2381 | CLK1    | ENSG00000013441 | 2:200860215-200861237:-     | 5.73E-06   | 0.581813515   | 0.65626         |
| 2382 | STRADB  | ENSG00000082146 | 2:201478191-201478356:+     | 0.0088034  | 0.088590818   | 0.111239692     |
| 2383 | TMEM237 | ENSG00000155755 | 2:201626147-201627320:-     | 0.00219798 | 0.094490399   | 0.072953436     |
| 2384 | ALS2    | ENSG00000003393 | 2:201718210-201723042:-     | 0.00606301 | 0.091736339   | 0.134365129     |
| 2385 | NOP58   | ENSG00000055044 | 2:202300137-202300233:+     | 0.00030972 | 0.283923488   | 0.29294313      |
| 2386 | CTDSP1  | ENSG00000144579 | 2:218403417-218404296:+     | 0.01544724 | 0.122604091   | 0.146609634     |
| 2387 | BCS1L   | ENSG00000074582 | 2:218661307-218661405:+     | 0.00161292 | 0.06769763    | 0.093321691     |
| 2388 | BCS1L   | ENSG00000074582 | 2:218662260-218662509:+     | 0.00720888 | 0.15831585    | 0.190627551     |
| 2389 | RNF25   | ENSG00000163481 | 2:218668146-218668238:-     | 0.00032668 | 0.236220915   | 0.189497449     |
| 2390 | TLL4    | ENSG00000135912 | 2:218748934-218749252:+     | 0.00949366 | 0.180117527   | 0.138058173     |
| 2391 | CNPPD1  | ENSG00000115649 | 2:219174207-219174777:-     | 3.89E-05   | 0.078504356   | 0.056906785     |
| 2392 | ZFAND2B | ENSG00000158552 | 2:219208348-219208425:+     | 0.00091496 | 0.17311226    | 0.128803523     |
| 2393 | ABCY6   | ENSG00000115657 | 2:219210475-219210710:-     | 0.00681418 | 0.210556268   | 0.175445826     |
| 2394 | ABCY6   | ENSG00000115657 | 2:219212491-219213007:-     | 9.66E-05   | 0.274717305   | 0.215758296     |



| S/N  | Gene    | Ensembl ID      | Position of retained intron | p-value    | AD_IR_average | Cont_IR_average |
|------|---------|-----------------|-----------------------------|------------|---------------|-----------------|
| 2395 | ABCB6   | ENSG00000115657 | 2:219214186-219214388:-     | 7.51E-06   | 0.699972829   | 0.620184649     |
| 2396 | ANKZF1  | ENSG00000163516 | 2:219232683-219233078:+     | 0.0073073  | 0.080629591   | 0.096299112     |
| 2397 | ANKZF1  | ENSG00000163516 | 2:219233191-219233285:+     | 0.00130586 | 0.185150188   | 0.239563468     |
| 2398 | ANKZF1  | ENSG00000163516 | 2:219233433-219233714:+     | 0.00033908 | 0.141179516   | 0.186969734     |
| 2399 | DNPEP   | ENSG00000123992 | 2:219382139-219383130:-     | 0.00268843 | 0.134307077   | 0.102635496     |
| 2400 | DNPEP   | ENSG00000123992 | 2:219384443-219385423:-     | 0.00042101 | 0.197475922   | 0.154859657     |
| 2401 | DNPEP   | ENSG00000123992 | 2:219385706-219385967:-     | 0.00269659 | 0.118720259   | 0.088578512     |
| 2402 | SPEG    | ENSG00000072195 | 2:219464608-219466056:+     | 0.00994059 | 0.098781755   | 0.081629962     |
| 2403 | SPEG    | ENSG00000072195 | 2:219481456-219481637:+     | 0.0086405  | 0.114556301   | 0.08168875      |
| 2404 | GMPPA   | ENSG00000144591 | 2:219504213-219505227:+     | 0.03949659 | 0.456109744   | 0.428514688     |
| 2405 | CHPF    | ENSG00000123989 | 2:219542189-219543224:-     | 0.00021471 | 0.092322901   | 0.063602919     |
| 2406 | TMEM198 | ENSG00000188760 | 2:219544893-219547505:+     | 0.00593599 | 0.20883084    | 0.164183591     |
| 2407 | TMEM198 | ENSG00000188760 | 2:219548081-219549151:+     | 2.49E-05   | 0.198847223   | 0.139062934     |
| 2408 | TMEM198 | ENSG00000188760 | 2:219549354-219549716:+     | 1.84E-05   | 0.18396687    | 0.119110017     |
| 2409 | OBSL1   | ENSG00000124006 | 2:219551798-219552111:-     | 0.00025023 | 0.163583955   | 0.111207475     |
| 2410 | OBSL1   | ENSG00000124006 | 2:219552216-219552535:-     | 3.42E-05   | 0.396982256   | 0.303545675     |
| 2411 | OBSL1   | ENSG00000124006 | 2:219557618-219557822:-     | 0.02080838 | 0.218105773   | 0.246047974     |
| 2412 | STK11IP | ENSG00000144589 | 2:219609540-219611603:+     | 0.01853292 | 0.079980461   | 0.100821777     |
| 2413 | FARSB   | ENSG00000116120 | 2:222624479-222624713:-     | 0.00234883 | 0.078279748   | 0.135077821     |
| 2414 | USP40   | ENSG00000085982 | 2:233477503-233481202:-     | 0.02352324 | 0.146687262   | 0.115215288     |
| 2415 | LRRFIP1 | ENSG00000124831 | 2:237756187-237760063:+     | 0.00798249 | 0.039092823   | 0.040387424     |
| 2416 | SCLY    | ENSG00000132330 | 2:238094522-238096800:+     | 0.00727181 | 0.327784841   | 0.272653156     |
| 2417 | ILKAP   | ENSG00000132323 | 2:238185287-238188130:-     | 0.0205711  | 0.107004609   | 0.089334892     |
| 2418 | HES6    | ENSG00000144485 | 2:238239251-238239486:-     | 0.0223202  | 0.225089232   | 0.180284305     |
| 2419 | HES6    | ENSG00000144485 | 2:238239747-238239824:-     | 0.00296237 | 0.117311512   | 0.088490816     |
| 2420 | NDUFA10 | ENSG00000130414 | 2:240011696-240014738:-     | 0.0009956  | 0.402496256   | 0.302432714     |
| 2421 | GPC1    | ENSG00000063660 | 2:240465648-240466057:+     | 9.36E-06   | 0.141807342   | 0.08177157      |
| 2422 | RNPEPL1 | ENSG00000142327 | 2:240569114-240572422:+     | 3.16E-05   | 0.24991858    | 0.178858539     |
| 2423 | RNPEPL1 | ENSG00000142327 | 2:240573261-240573774:+     | 0.0225162  | 0.168110716   | 0.135263703     |
| 2424 | RNPEPL1 | ENSG00000142327 | 2:240574348-240574514:+     | 0.02082999 | 0.369541463   | 0.330313974     |
| 2425 | RNPEPL1 | ENSG00000142327 | 2:240575610-240576534:+     | 0.02612297 | 0.165220098   | 0.187623166     |
| 2426 | CAPN10  | ENSG00000142330 | 2:240591011-240591932:+     | 6.65E-07   | 0.175275707   | 0.117755797     |
| 2427 | CAPN10  | ENSG00000142330 | 2:240595304-240596318:+     | 0.0122935  | 0.346700732   | 0.371576338     |
| 2428 | CAPN10  | ENSG00000142330 | 2:240596521-240596680:+     | 1.60E-05   | 0.198081605   | 0.241475247     |
| 2429 | KIF1A   | ENSG00000130294 | 2:240726940-240728388:-     | 0.0219998  | 0.013858248   | 0.017288984     |
| 2430 | MTERF4  | ENSG00000122085 | 2:241075682-241089187:-     | 0.00100818 | 0.452778829   | 0.386539584     |
| 2431 | SNED1   | ENSG00000162804 | 2:241082364-241087391:+     | 0.01580261 | 0.2973325     | 0.259657727     |
| 2432 | PPP1R7  | ENSG00000115685 | 2:241166441-241167044:+     | 0.00096076 | 0.038954691   | 0.028961701     |
| 2433 | Sep-02  | ENSG00000168385 | 2:241315982-241324215:+     | 0.03840487 | 0.096720327   | 0.076274571     |
| 2434 | FARP2   | ENSG00000006607 | 2:241463468-241463898:+     | 0.00221525 | 0.219540741   | 0.169020977     |
| 2435 | FARP2   | ENSG00000006607 | 2:241483533-241484241:+     | 2.41E-07   | 0.216857778   | 0.15276817      |
| 2436 | FARP2   | ENSG00000006607 | 2:241484331-241489961:+     | 0.00785963 | 0.445201402   | 0.439956234     |
| 2437 | FARP2   | ENSG00000006607 | 2:241490044-241491060:+     | 0.00115365 | 0.220430829   | 0.176159918     |
| 2438 | FARP2   | ENSG00000006607 | 2:241491179-241491515:+     | 0.00458204 | 0.214545876   | 0.174122851     |
| 2439 | FARP2   | ENSG00000006607 | 2:241491679-241492928:+     | 0.00035648 | 0.24616243    | 0.192889751     |
| 2440 | FARP2   | ENSG00000006607 | 2:241493036-241493292:+     | 6.57E-05   | 0.263787934   | 0.215075548     |
| 2441 | STK25   | ENSG00000115694 | 2:241498349-241498638:-     | 0.00594064 | 0.145172365   | 0.123140974     |
| 2442 | BOK     | ENSG00000176720 | 2:241570288-241572296:+     | 0.00884544 | 0.248483318   | 0.197374539     |
| 2443 | ATG4B   | ENSG00000168397 | 2:241654647-241655270:+     | 0.00085827 | 0.229075221   | 0.174981003     |
| 2444 | ATG4B   | ENSG00000168397 | 2:241666838-241668142:+     | 0.00049667 | 0.073348218   | 0.097985092     |
| 2445 | ATG4B   | ENSG00000168397 | 2:241671405-241672190:+     | 0.00206033 | 0.572716183   | 0.510432208     |
| 2446 | DTYMK   | ENSG00000168393 | 2:241678649-241680228:-     | 0.02754339 | 0.137509406   | 0.152408873     |
| 2447 | DTYMK   | ENSG00000168393 | 2:241680319-241685768:-     | 0.04420805 | 0.2470077     | 0.20533819      |
| 2448 | RBCK1   | ENSG00000125826 | 20:421031-422126:+          | 0.00274342 | 0.675037268   | 0.632626325     |
| 2449 | RBCK1   | ENSG00000125826 | 20:428589-428950:+          | 0.02794731 | 0.096607046   | 0.110743094     |
| 2450 | SIRPA   | ENSG00000198053 | 20:1922645-1924763:+        | 0.04078748 | 0.108219666   | 0.082017895     |
| 2451 | SIRPA   | ENSG00000198053 | 20:1934754-1937319:+        | 0.00095254 | 0.109836055   | 0.082079488     |

| S/N  | Gene     | Ensembl ID      | Position of retained intron | p-value    | AD_IR_average | Cont_IR_average |
|------|----------|-----------------|-----------------------------|------------|---------------|-----------------|
| 2452 | IDH3B    | ENSG00000101365 | 20:2659793-2660029:-        | 0.01315061 | 0.135153927   | 0.111338708     |
| 2453 | PCED1A   | ENSG00000132635 | 20:2835709-2836038:-        | 0.04762859 | 0.127102288   | 0.115625387     |
| 2454 | PCED1A   | ENSG00000132635 | 20:2836314-2838231:-        | 0.00181724 | 0.304780037   | 0.264318481     |
| 2455 | PCED1A   | ENSG00000132635 | 20:2839271-2839788:-        | 0.00297562 | 0.390090585   | 0.334317234     |
| 2456 | PCED1A   | ENSG00000132635 | 20:2839933-2840210:-        | 0.00056963 | 0.287459927   | 0.227514039     |
| 2457 | PTPRA    | ENSG00000132670 | 20:2864287-2864364:+        | 0.00778561 | 0.074103927   | 0.094678826     |
| 2458 | LZTS3    | ENSG00000088899 | 20:3167181-3167737:-        | 0.01493957 | 0.338805037   | 0.328148273     |
| 2459 | CDC25B   | ENSG00000101224 | 20:3801388-3801721:+        | 0.02472666 | 0.291296987   | 0.267110766     |
| 2460 | CDC25B   | ENSG00000101224 | 20:3803537-3804568:+        | 0.02501062 | 0.133236448   | 0.11267243      |
| 2461 | NDUFAF5  | ENSG00000101247 | 20:13814515-13816462:+      | 0.01841159 | 0.056407127   | 0.047570461     |
| 2462 | RRBP1    | ENSG00000125844 | 20:17619728-17620298:-      | 0.01054615 | 0.130289188   | 0.10941784      |
| 2463 | CRNKL1   | ENSG00000101343 | 20:20036362-20037322:-      | 0.00725987 | 0.097107249   | 0.07783033      |
| 2464 | KIZ      | ENSG00000088970 | 20:21232830-21244244:+      | 5.15E-15   | 0.189652427   | 0.106704057     |
| 2465 | KIZ      | ENSG00000088970 | 20:21244288-21246478:+      | 5.27E-06   | 0.41060878    | 0.320885601     |
| 2466 | ACSS1    | ENSG00000154930 | 20:25012664-25012811:-      | 0.00167922 | 0.302514991   | 0.245875695     |
| 2467 | PYGB     | ENSG00000100994 | 20:25274723-25276645:+      | 0.01758549 | 0.12569805    | 0.111331391     |
| 2468 | PYGB     | ENSG00000100994 | 20:25292613-25294157:+      | 0.00030467 | 0.121524491   | 0.091506055     |
| 2469 | ABHD12   | ENSG00000100997 | 20:25300884-25302218:-      | 4.79E-07   | 0.111518572   | 0.076736556     |
| 2470 | ABHD12   | ENSG00000100997 | 20:25303628-25306832:-      | 1.02E-10   | 0.101403216   | 0.058485212     |
| 2471 | NINL     | ENSG00000101004 | 20:25455786-25458382:-      | 0.049469   | 0.31910578    | 0.269718297     |
| 2472 | NINL     | ENSG00000101004 | 20:25480267-25481967:-      | 0.00792345 | 0.122727613   | 0.094296083     |
| 2473 | HM13     | ENSG00000101294 | 20:31566295-31568077:+      | 0.00348984 | 0.08276811    | 0.071584269     |
| 2474 | ID1      | ENSG00000125968 | 20:31605813-31606052:+      | 0.01037586 | 0.071901513   | 0.0950085       |
| 2475 | TM9SF4   | ENSG00000101337 | 20:32150875-32155102:+      | 0.00714631 | 0.232601139   | 0.215058205     |
| 2476 | TM9SF4   | ENSG00000101337 | 20:32158514-32159991:+      | 0.00217694 | 0.101450177   | 0.081902035     |
| 2477 | CDK5RAP1 | ENSG00000101391 | 20:33359123-33360350:-      | 1.64E-12   | 0.342121044   | 0.215985716     |
| 2478 | CDK5RAP1 | ENSG00000101391 | 20:33372697-33374114:-      | 0.01687845 | 0.382658195   | 0.340364169     |
| 2479 | SNTA1    | ENSG00000101400 | 20:33410331-33412295:-      | 0.02715263 | 0.123326921   | 0.099210887     |
| 2480 | RALY     | ENSG00000125970 | 20:34073635-34073818:+      | 0.00017675 | 0.095812083   | 0.067782969     |
| 2481 | RALY     | ENSG00000125970 | 20:34073635-34075873:+      | 5.41E-05   | 0.093657844   | 0.072397968     |
| 2482 | RALY     | ENSG00000125970 | 20:34073866-34075873:+      | 0.00197045 | 0.095221832   | 0.07421853      |
| 2483 | PIGU     | ENSG00000101464 | 20:34560979-34575103:-      | 8.11E-08   | 0.116122918   | 0.069810142     |
| 2484 | GGT7     | ENSG00000131067 | 20:34861562-34862813:-      | 0.00192673 | 0.091306217   | 0.068459009     |
| 2485 | GGT7     | ENSG00000131067 | 20:34862965-34863312:-      | 0.02479737 | 0.121337068   | 0.104785855     |
| 2486 | ACSS2    | ENSG00000131069 | 20:34920709-34921005:+      | 0.00441522 | 0.462570634   | 0.422248532     |
| 2487 | ACSS2    | ENSG00000131069 | 20:34921139-34921329:+      | 0.00506694 | 0.481757244   | 0.429040143     |
| 2488 | ACSS2    | ENSG00000131069 | 20:34921462-34921543:+      | 0.00623564 | 0.31828172    | 0.264984597     |
| 2489 | ACSS2    | ENSG00000131069 | 20:34921600-34921785:+      | 0.00184445 | 0.238343949   | 0.193241806     |
| 2490 | ACSS2    | ENSG00000131069 | 20:34921866-34923322:+      | 0.00925743 | 0.16792865    | 0.148971391     |
| 2491 | ACSS2    | ENSG00000131069 | 20:34925766-34926104:+      | 0.00022047 | 0.136751706   | 0.106764958     |
| 2492 | ACSS2    | ENSG00000131069 | 20:34926281-34926876:+      | 2.29E-06   | 0.124573651   | 0.091467542     |
| 2493 | ACSS2    | ENSG00000131069 | 20:34926951-34927086:+      | 7.16E-06   | 0.11904513    | 0.089339429     |
| 2494 | GSS      | ENSG00000100983 | 20:34928951-34929400:-      | 0.00124537 | 0.269348596   | 0.200325032     |
| 2495 | GSS      | ENSG00000100983 | 20:34929590-34931335:-      | 0.00198801 | 0.130622872   | 0.090472906     |
| 2496 | MYH7B    | ENSG00000078814 | 20:35001158-35001244:+      | 0.02143918 | 0.185834097   | 0.143015454     |
| 2497 | MYH7B    | ENSG00000078814 | 20:35001526-35001947:+      | 0.01552788 | 0.290493589   | 0.222856491     |
| 2498 | TRPC4AP  | ENSG00000100991 | 20:35003283-35003409:-      | 0.00880595 | 0.11816578    | 0.091280561     |
| 2499 | UQCC1    | ENSG00000101019 | 20:35304069-35306665:-      | 0.00712941 | 0.2741135     | 0.233407538     |
| 2500 | CEP250   | ENSG00000126001 | 20:35474052-35475501:+      | 0.00592074 | 0.059114337   | 0.077765921     |
| 2501 | CPNE1    | ENSG00000214078 | 20:35627413-35630438:-      | 6.99E-06   | 0.395331927   | 0.311128351     |
| 2502 | CPNE1    | ENSG00000214078 | 20:35632025-35632162:-      | 2.36E-05   | 0.217916061   | 0.191619049     |
| 2503 | NFS1     | ENSG00000244005 | 20:35674617-35675044:-      | 9.42E-05   | 0.093246638   | 0.130584518     |
| 2504 | SCAND1   | ENSG00000171222 | 20:35954339-35954447:-      | 0.0123896  | 0.610279439   | 0.656753766     |
| 2505 | RPN2     | ENSG00000118705 | 20:37228744-37229972:+      | 0.00145478 | 0.097250877   | 0.070683383     |
| 2506 | TTI1     | ENSG00000101407 | 20:37983639-37996374:-      | 0.00021865 | 0.171766188   | 0.126864508     |
| 2507 | PLCG1    | ENSG00000124181 | 20:41159758-41159869:+      | 6.75E-05   | 0.070275662   | 0.105951039     |
| 2508 | PLCG1    | ENSG00000124181 | 20:41165826-41166193:+      | 0.00443939 | 0.075228928   | 0.102419525     |

| S/N  | Gene    | Ensembl ID      | Position of retained intron | p-value    | AD_IR_average | Cont_IR_average |
|------|---------|-----------------|-----------------------------|------------|---------------|-----------------|
| 2509 | PLCG1   | ENSG00000124181 | 20:41166859-41167851:+      | 0.02129307 | 0.508204732   | 0.459645974     |
| 2510 | L3MBTL1 | ENSG00000185513 | 20:43536294-43536408:+      | 0.01497874 | 0.145660792   | 0.108699091     |
| 2511 | L3MBTL1 | ENSG00000185513 | 20:43540308-43540752:+      | 0.01552255 | 0.136438783   | 0.111079713     |
| 2512 | GDAP1L1 | ENSG00000124194 | 20:44258607-44263229:+      | 6.30E-06   | 0.104146351   | 0.068288652     |
| 2513 | TOMM34  | ENSG00000025772 | 20:44943213-44943452:-      | 0.01106631 | 0.108989909   | 0.090578101     |
| 2514 | PIGT    | ENSG00000124155 | 20:45420693-45421382:+      | 0.02007292 | 0.093400048   | 0.072397794     |
| 2515 | PIGT    | ENSG00000124155 | 20:45421583-45424215:+      | 0.00010282 | 0.115308037   | 0.076664261     |
| 2516 | DNTTIP1 | ENSG00000101457 | 20:45802057-45803332:+      | 0.01405118 | 0.09816405    | 0.076927558     |
| 2517 | ACOT8   | ENSG00000101473 | 20:45843721-45844262:-      | 1.02E-05   | 0.405761596   | 0.30551394      |
| 2518 | ACOT8   | ENSG00000101473 | 20:45844420-45848449:-      | 4.34E-05   | 0.353346573   | 0.277592886     |
| 2519 | ACOT8   | ENSG00000101473 | 20:45848675-45855158:-      | 0.00097088 | 0.181065593   | 0.154521966     |
| 2520 | CTSA    | ENSG00000064601 | 20:45891762-45891915:+      | 1.09E-06   | 0.163286899   | 0.108144582     |
| 2521 | CTSA    | ENSG00000064601 | 20:45892027-45892272:+      | 4.49E-05   | 0.116665188   | 0.082850149     |
| 2522 | CTSA    | ENSG00000064601 | 20:45892323-45892397:+      | 1.14E-06   | 0.143208873   | 0.095704005     |
| 2523 | CTSA    | ENSG00000064601 | 20:45895133-45896964:+      | 0.04802525 | 0.324381712   | 0.295661532     |
| 2524 | CTSA    | ENSG00000064601 | 20:45897040-45897716:+      | 0.04177649 | 0.470004232   | 0.437187909     |
| 2525 | PCIF1   | ENSG00000100982 | 20:45939339-45940474:+      | 0.02144801 | 0.278999423   | 0.253878816     |
| 2526 | ZNF335  | ENSG00000198026 | 20:45949080-45949169:-      | 7.84E-07   | 0.136093765   | 0.094825625     |
| 2527 | ZNF335  | ENSG00000198026 | 20:45949251-45949332:-      | 2.07E-07   | 0.143197938   | 0.097051971     |
| 2528 | ZNF335  | ENSG00000198026 | 20:45949398-45949484:-      | 5.90E-08   | 0.160353802   | 0.106104309     |
| 2529 | ZNF335  | ENSG00000198026 | 20:45949568-45949799:-      | 6.51E-05   | 0.223729354   | 0.176546852     |
| 2530 | ZNF335  | ENSG00000198026 | 20:45949877-45949965:-      | 8.07E-08   | 0.139657313   | 0.093384473     |
| 2531 | ZNF335  | ENSG00000198026 | 20:45950069-45950218:-      | 4.97E-07   | 0.150318756   | 0.099350919     |
| 2532 | ZNF335  | ENSG00000198026 | 20:45950373-45950452:-      | 0.0002041  | 0.166536896   | 0.124156608     |
| 2533 | ZNF335  | ENSG00000198026 | 20:45950595-45952146:-      | 0.00015852 | 0.250082012   | 0.202391764     |
| 2534 | ZNF335  | ENSG00000198026 | 20:45952521-45952597:-      | 1.60E-05   | 0.178955395   | 0.130342816     |
| 2535 | ZNF335  | ENSG00000198026 | 20:45952709-45953688:-      | 4.53E-10   | 0.160992695   | 0.099588669     |
| 2536 | CD40    | ENSG00000101017 | 20:46122358-46122609:+      | 0.01167249 | 0.142674815   | 0.116365778     |
| 2537 | SLC35C2 | ENSG00000080189 | 20:46350524-46350760:-      | 0.01923467 | 0.125828328   | 0.157361558     |
| 2538 | TMEM189 | ENSG00000240849 | 20:50125179-50127974:-      | 0.00017753 | 0.275268715   | 0.221796627     |
| 2539 | DPM1    | ENSG00000000419 | 20:50945762-50945846:-      | 0.00994729 | 0.169962346   | 0.139533835     |
| 2540 | RAE1    | ENSG00000101146 | 20:57368812-57373474:+      | 0.04968276 | 0.110195544   | 0.093526765     |
| 2541 | RAE1    | ENSG00000101146 | 20:57373581-57373662:+      | 0.00391898 | 0.104519004   | 0.081595048     |
| 2542 | RBM38   | ENSG00000132819 | 20:57393333-57407542:+      | 0.00111349 | 0.168407483   | 0.138789777     |
| 2543 | NPEPL1  | ENSG00000215440 | 20:58693050-58693736:+      | 0.00019737 | 0.316020427   | 0.245620227     |
| 2544 | NPEPL1  | ENSG00000215440 | 20:58712579-58713419:+      | 0.0193755  | 0.18744539    | 0.156294048     |
| 2545 | GNAS    | ENSG00000087460 | 20:58898985-58899948:+      | 1.04E-08   | 0.019456404   | 0.012073827     |
| 2546 | GNAS    | ENSG00000087460 | 20:58898985-58903527:+      | 0.00072037 | 0.017470034   | 0.013260762     |
| 2547 | ADRM1   | ENSG00000130706 | 20:62306320-62306647:+      | 0.00045884 | 0.298115066   | 0.244010906     |
| 2548 | ADRM1   | ENSG00000130706 | 20:62306734-62307370:+      | 0.00676841 | 0.390236902   | 0.33727926      |
| 2549 | ADRM1   | ENSG00000130706 | 20:62307452-62307595:+      | 0.00185765 | 0.284577929   | 0.226325581     |
| 2550 | ADRM1   | ENSG00000130706 | 20:62308178-62308367:+      | 1.24E-06   | 0.246423889   | 0.179240903     |
| 2551 | LAMA5   | ENSG00000130702 | 20:62311094-62311161:-      | 0.018936   | 0.098920572   | 0.117247958     |
| 2552 | LAMA5   | ENSG00000130702 | 20:62312780-62312887:-      | 0.01015192 | 0.353832378   | 0.288747169     |
| 2553 | LAMA5   | ENSG00000130702 | 20:62313010-62313087:-      | 0.00015404 | 0.366115415   | 0.278697443     |
| 2554 | LAMA5   | ENSG00000130702 | 20:62314440-62314554:-      | 0.01349754 | 0.086777433   | 0.105167431     |
| 2555 | LAMA5   | ENSG00000130702 | 20:62314725-62314798:-      | 0.01247637 | 0.106152999   | 0.131465061     |
| 2556 | LAMA5   | ENSG00000130702 | 20:62315207-62315947:-      | 0.00171602 | 0.073133224   | 0.101684939     |
| 2557 | LAMA5   | ENSG00000130702 | 20:62317023-62317344:-      | 0.01067316 | 0.074581287   | 0.104733644     |
| 2558 | LAMA5   | ENSG00000130702 | 20:62317499-62317661:-      | 0.00169617 | 0.064067827   | 0.097820719     |
| 2559 | LAMA5   | ENSG00000130702 | 20:62319013-62319683:-      | 0.00250576 | 0.095937763   | 0.13584259      |
| 2560 | SLCO4A1 | ENSG00000101187 | 20:62668184-62668476:+      | 0.02253293 | 0.172928622   | 0.21999577      |
| 2561 | TCFL5   | ENSG00000101190 | 20:62842097-62854015:-      | 0.04282902 | 0.077299177   | 0.066401499     |
| 2562 | GID8    | ENSG00000101193 | 20:62943183-62943494:+      | 0.02192947 | 0.084718254   | 0.114321879     |
| 2563 | ARFGAP1 | ENSG00000101199 | 20:63276651-63277204:+      | 0.00082801 | 0.112866083   | 0.08507587      |
| 2564 | ARFGAP1 | ENSG00000101199 | 20:63277305-63278116:+      | 0.00034703 | 0.097625549   | 0.068508531     |
| 2565 | KCNQ2   | ENSG00000075043 | 20:63445364-63446746:-      | 0.00862241 | 0.073139172   | 0.098130464     |

| S/N  | Gene    | Ensembl ID      | Position of retained intron | p-value    | AD_IR_average | Cont_IR_average |
|------|---------|-----------------|-----------------------------|------------|---------------|-----------------|
| 2566 | RTEL1   | ENSG00000258366 | 20:63678346-63679848:+      | 0.00551114 | 0.085150957   | 0.113619118     |
| 2567 | RTEL1   | ENSG00000258366 | 20:63688605-63689054:+      | 0.01172505 | 0.216324594   | 0.170878678     |
| 2568 | RTEL1   | ENSG00000258366 | 20:63690210-63690293:+      | 0.03198824 | 0.283089749   | 0.224821717     |
| 2569 | ARFRP1  | ENSG00000101246 | 20:63700530-63700601:-      | 0.00474913 | 0.312753651   | 0.247446221     |
| 2570 | ZGPAT   | ENSG00000197114 | 20:63708118-63708552:+      | 7.50E-05   | 0.103256761   | 0.076987314     |
| 2571 | TPD52L2 | ENSG00000101150 | 20:63873816-63882718:+      | 0.01518965 | 0.15992934    | 0.193020453     |
| 2572 | UCKL1   | ENSG00000198276 | 20:63945975-63946160:-      | 0.00970676 | 0.42603       | 0.48676074      |
| 2573 | TCEA2   | ENSG00000171703 | 20:64067020-64068046:+      | 4.22E-05   | 0.154714678   | 0.112667357     |
| 2574 | TCEA2   | ENSG00000171703 | 20:64069491-64069764:+      | 4.07E-06   | 0.148794489   | 0.094886047     |
| 2575 | TCEA2   | ENSG00000171703 | 20:64070414-64070488:+      | 9.50E-06   | 0.110955765   | 0.072665084     |
| 2576 | MRPL39  | ENSG00000154719 | 21:25585754-25588834:-      | 0.01404215 | 0.197750317   | 0.162891249     |
| 2577 | SCAF4   | ENSG00000156304 | 21:31692449-31693293:-      | 0.0037712  | 0.09202341    | 0.06584026      |
| 2578 | TCP10L  | ENSG00000242220 | 21:32576923-32578693:-      | 0.0257511  | 0.112795845   | 0.092203313     |
| 2579 | PSMG1   | ENSG00000183527 | 21:39175664-39177434:-      | 0.00300722 | 0.21241272    | 0.180432477     |
| 2580 | HMG1    | ENSG00000205581 | 21:39345274-39345829:-      | 0.00032852 | 0.155700571   | 0.152630351     |
| 2581 | PDXK    | ENSG00000160209 | 21:43743807-43746078:+      | 0.00097039 | 0.308597805   | 0.252161271     |
| 2582 | RRP1    | ENSG00000160214 | 21:43792729-43793318:+      | 0.0005546  | 0.19866165    | 0.15634314      |
| 2583 | RRP1    | ENSG00000160214 | 21:43802387-43803511:+      | 0.01659388 | 0.278725707   | 0.248566208     |
| 2584 | PFKL    | ENSG00000141959 | 21:44313682-44313912:+      | 0.00105786 | 0.161463217   | 0.118972657     |
| 2585 | PFKL    | ENSG00000141959 | 21:44320147-44321728:+      | 0.04373983 | 0.160712634   | 0.139224242     |
| 2586 | PFKL    | ENSG00000141959 | 21:44324917-44325152:+      | 0.00095434 | 0.113767167   | 0.084552883     |
| 2587 | PFKL    | ENSG00000141959 | 21:44325264-44325960:+      | 0.00343686 | 0.128295044   | 0.101599951     |
| 2588 | C21orf2 | ENSG00000160226 | 21:44337667-44339117:-      | 0.01192128 | 0.14444128    | 0.112026278     |
| 2589 | PCBP3   | ENSG00000183570 | 21:45917629-45929916:+      | 0.01662513 | 0.091689582   | 0.072724442     |
| 2590 | PCBP3   | ENSG00000183570 | 21:45929995-45930785:+      | 0.01669959 | 0.091004529   | 0.07544779      |
| 2591 | PCBP3   | ENSG00000183570 | 21:45930845-45935252:+      | 0.01744216 | 0.113009609   | 0.093754122     |
| 2592 | LSS     | ENSG00000160285 | 21:46191959-46194490:-      | 0.00046767 | 0.581099451   | 0.493746805     |
| 2593 | LSS     | ENSG00000160285 | 21:46222738-46227551:-      | 0.00017446 | 0.082473939   | 0.124904497     |
| 2594 | MCM3AP  | ENSG00000160294 | 21:46270563-46272560:-      | 2.55E-05   | 0.087119026   | 0.156001775     |
| 2595 | PCNT    | ENSG00000160299 | 21:46430657-46431528:+      | 0.00121023 | 0.337393244   | 0.291891806     |
| 2596 | PCNT    | ENSG00000160299 | 21:46443948-46444693:+      | 0.01090974 | 0.46111189    | 0.496596156     |
| 2597 | CECR5   | ENSG00000069998 | 22:17143131-17145023:-      | 0.00638609 | 0.210603255   | 0.17530016      |
| 2598 | DGCR6   | ENSG00000183628 | 22:18910272-18910887:+      | 0.02066084 | 0.313478866   | 0.297342468     |
| 2599 | PRODH   | ENSG00000100033 | 22:18913362-18913437:-      | 0.02660944 | 0.331759549   | 0.284732396     |
| 2600 | PRODH   | ENSG00000100033 | 22:18925722-18930989:-      | 0.02631941 | 0.225404733   | 0.171984423     |
| 2601 | SLC25A1 | ENSG00000100075 | 22:19177204-19177726:-      | 0.00088495 | 0.31831328    | 0.259211039     |
| 2602 | SLC25A1 | ENSG00000100075 | 22:19178041-19178132:-      | 0.03945955 | 0.101458904   | 0.080552496     |
| 2603 | UFD1L   | ENSG00000070010 | 22:19450744-19454748:-      | 0.00270527 | 0.339622415   | 0.286971182     |
| 2604 | ARVCF   | ENSG00000099889 | 22:19975757-19977414:-      | 3.10E-06   | 0.041772388   | 0.046180248     |
| 2605 | ARVCF   | ENSG00000099889 | 22:19980242-19981210:-      | 0.00072815 | 0.253164      | 0.332119935     |
| 2606 | DGCR8   | ENSG00000128191 | 22:20090258-20091434:+      | 5.66E-05   | 0.489870402   | 0.405898874     |
| 2607 | TRMT2A  | ENSG00000099899 | 22:20113007-20113117:-      | 0.00036821 | 0.232207198   | 0.181630304     |
| 2608 | TRMT2A  | ENSG00000099899 | 22:20113234-20113431:-      | 0.00056519 | 0.313926598   | 0.245434583     |
| 2609 | TRMT2A  | ENSG00000099899 | 22:20113808-20114573:-      | 0.00114775 | 0.241458393   | 0.188828245     |
| 2610 | TRMT2A  | ENSG00000099899 | 22:20115079-20115265:-      | 0.00288439 | 0.314787305   | 0.382080701     |
| 2611 | ZDHHC8  | ENSG00000099904 | 22:20139892-20140114:+      | 0.00113593 | 0.605491512   | 0.53849326      |
| 2612 | DGCR6L  | ENSG00000128185 | 22:20315476-20316118:-      | 0.00536279 | 0.157618718   | 0.149456818     |
| 2613 | DGCR6L  | ENSG00000128185 | 22:20315476-20319638:-      | 9.66E-07   | 0.1409415     | 0.119467065     |
| 2614 | DGCR6L  | ENSG00000128185 | 22:20316219-20319638:-      | 7.85E-05   | 0.142377127   | 0.120287952     |
| 2615 | MED15   | ENSG00000099917 | 22:20585015-20585100:+      | 0.00013659 | 0.223908717   | 0.172422296     |
| 2616 | AIFM3   | ENSG00000183773 | 22:20973867-20974062:+      | 0.00314144 | 0.114112588   | 0.148705812     |
| 2617 | AIFM3   | ENSG00000183773 | 22:20978005-20979270:+      | 0.00697858 | 0.132649652   | 0.118239187     |
| 2618 | AIFM3   | ENSG00000183773 | 22:20979702-20980019:+      | 8.24E-06   | 0.166350511   | 0.124720771     |
| 2619 | AIFM3   | ENSG00000183773 | 22:20980124-20980991:+      | 0.01093997 | 0.176674      | 0.139921131     |
| 2620 | LZTR1   | ENSG00000099949 | 22:20995026-20995745:+      | 0.0024382  | 0.166790641   | 0.210889736     |
| 2621 | SLC2A11 | ENSG00000133460 | 22:23882646-23882758:+      | 0.01531407 | 0.179342666   | 0.21428887      |
| 2622 | CABIN1  | ENSG00000099991 | 22:24091843-24095930:+      | 0.02773645 | 0.225979855   | 0.190788569     |



| S/N  | Gene      | Ensembl ID      | Position of retained intron | p-value    | AD_IR_average | Cont_IR_average |
|------|-----------|-----------------|-----------------------------|------------|---------------|-----------------|
| 2623 | SRRD      | ENSG00000100104 | 22:26490198-26491024:+      | 0.00279931 | 0.095950478   | 0.162555438     |
| 2624 | TFIP11    | ENSG00000100109 | 22:26492368-26494138:-      | 0.04144303 | 0.337023268   | 0.363490532     |
| 2625 | TFIP11    | ENSG00000100109 | 22:26494939-26496072:-      | 0.00156535 | 0.120383479   | 0.150724683     |
| 2626 | TFIP11    | ENSG00000100109 | 22:26496889-26498868:-      | 0.00066877 | 0.133634713   | 0.182754832     |
| 2627 | TPST2     | ENSG00000128294 | 22:26526267-26528213:-      | 0.01083114 | 0.096539889   | 0.115816045     |
| 2628 | HSCB      | ENSG00000100209 | 22:28746008-28751240:+      | 0.0130824  | 0.067947444   | 0.055170401     |
| 2629 | RHBDD3    | ENSG00000100263 | 22:29260864-29263834:-      | 1.70E-07   | 0.19419877    | 0.138298405     |
| 2630 | EWSR1     | ENSG00000182944 | 22:29273864-29278029:+      | 0.00084193 | 0.168218074   | 0.117930512     |
| 2631 | EWSR1     | ENSG00000182944 | 22:29288786-29291561:+      | 0.00030989 | 0.316735538   | 0.244545297     |
| 2632 | EWSR1     | ENSG00000182944 | 22:29291599-29292136:+      | 0.00340291 | 0.282984052   | 0.245087571     |
| 2633 | AP1B1     | ENSG00000100280 | 22:29329720-29330377:-      | 0.00198341 | 0.052974838   | 0.039921935     |
| 2634 | AP1B1     | ENSG00000100280 | 22:29331916-29334264:-      | 0.01348119 | 0.106523822   | 0.089659027     |
| 2635 | NF2       | ENSG00000186575 | 22:29683064-29694751:+      | 0.0126415  | 0.08363403    | 0.066558587     |
| 2636 | CABP7     | ENSG00000100314 | 22:29728742-29729054:+      | 0.00011199 | 0.17677246    | 0.132773778     |
| 2637 | RNF215    | ENSG00000099999 | 22:30379622-30379710:-      | 0.00036294 | 0.453371598   | 0.36864913      |
| 2638 | RNF215    | ENSG00000099999 | 22:30385989-30386069:-      | 0.04977951 | 0.350425024   | 0.315833805     |
| 2639 | SMTN      | ENSG00000183963 | 22:31095609-31096732:+      | 0.0183748  | 0.41830739    | 0.450664922     |
| 2640 | SMTN      | ENSG00000183963 | 22:31099179-31099744:+      | 3.04E-06   | 0.211221187   | 0.128399845     |
| 2641 | EIF4ENIF1 | ENSG00000184708 | 22:31440121-31440703:-      | 0.00596562 | 0.226874117   | 0.190176696     |
| 2642 | EIF4ENIF1 | ENSG00000184708 | 22:31442118-31442961:-      | 0.03399316 | 0.196332939   | 0.166101866     |
| 2643 | SFI1      | ENSG00000198089 | 22:31611303-31611765:+      | 0.00199279 | 0.161557382   | 0.12098796      |
| 2644 | SFI1      | ENSG00000198089 | 22:31613216-31613353:+      | 0.00089958 | 0.249921893   | 0.186293716     |
| 2645 | SFI1      | ENSG00000198089 | 22:31613530-31613601:+      | 0.00040978 | 0.209747806   | 0.140849678     |
| 2646 | SFI1      | ENSG00000198089 | 22:31613855-31614788:+      | 6.16E-06   | 0.546814634   | 0.43277826      |
| 2647 | SFI1      | ENSG00000198089 | 22:31614860-31615047:+      | 5.15E-05   | 0.446711415   | 0.344007623     |
| 2648 | RBFOX2    | ENSG00000100320 | 22:35746561-35756104:-      | 0.00462346 | 0.100235      | 0.127809162     |
| 2649 | MYH9      | ENSG00000100345 | 22:36305102-36305929:-      | 1.83E-08   | 0.162713427   | 0.095665362     |
| 2650 | MPST      | ENSG00000128309 | 22:37024810-37029215:+      | 0.02078589 | 0.108972074   | 0.081780708     |
| 2651 | KCTD17    | ENSG00000100379 | 22:37061629-37062524:+      | 0.00496409 | 0.143046873   | 0.120515974     |
| 2652 | GGA1      | ENSG00000100083 | 22:37616997-37618447:+      | 0.04289513 | 0.351026159   | 0.329321532     |
| 2653 | GGA1      | ENSG00000100083 | 22:37618546-37620237:+      | 0.0042644  | 0.113155452   | 0.094089808     |
| 2654 | GGA1      | ENSG00000100083 | 22:37620361-37620812:+      | 1.61E-07   | 0.171388446   | 0.113791696     |
| 2655 | NOL12     | ENSG00000273899 | 22:37691424-37693331:+      | 4.32E-06   | 0.627068598   | 0.533537455     |
| 2656 | PICK1     | ENSG00000100151 | 22:38073823-38074306:+      | 9.53E-06   | 0.762181683   | 0.711360351     |
| 2657 | PLA2G6    | ENSG00000184381 | 22:38113654-38115526:-      | 0.00023261 | 0.171737756   | 0.123284364     |
| 2658 | PLA2G6    | ENSG00000184381 | 22:38115681-38116074:-      | 7.61E-05   | 0.203990271   | 0.152908151     |
| 2659 | PLA2G6    | ENSG00000184381 | 22:38120909-38123094:-      | 0.00014029 | 0.176971237   | 0.136463553     |
| 2660 | CSNK1E    | ENSG00000213923 | 22:38293319-38294108:-      | 0.00246924 | 0.26406928    | 0.224845266     |
| 2661 | CBX7      | ENSG00000100307 | 22:39134048-39134400:-      | 0.00319502 | 0.100133828   | 0.078460132     |
| 2662 | SYNGR1    | ENSG00000100321 | 22:39374553-39376051:+      | 0.01499071 | 0.378544449   | 0.309531818     |
| 2663 | SGSM3     | ENSG00000100359 | 22:40406662-40407016:+      | 5.58E-05   | 0.280682963   | 0.211133265     |
| 2664 | SGSM3     | ENSG00000100359 | 22:40407071-40407200:+      | 0.02932242 | 0.278126166   | 0.23734346      |
| 2665 | SGSM3     | ENSG00000100359 | 22:40407568-40407788:+      | 0.00013096 | 0.463591927   | 0.387767091     |
| 2666 | SGSM3     | ENSG00000100359 | 22:40407843-40408070:+      | 0.00019391 | 0.438717512   | 0.36612639      |
| 2667 | SGSM3     | ENSG00000100359 | 22:40408842-40408932:+      | 0.00893588 | 0.258822378   | 0.217030887     |
| 2668 | L3MBTL2   | ENSG00000100395 | 22:41224251-41224724:+      | 0.03689814 | 0.083896085   | 0.112097052     |
| 2669 | L3MBTL2   | ENSG00000100395 | 22:41224801-41224966:+      | 0.00167869 | 0.076614778   | 0.114477409     |
| 2670 | L3MBTL2   | ENSG00000100395 | 22:41225071-41225793:+      | 0.00541942 | 0.079101411   | 0.11161091      |
| 2671 | L3MBTL2   | ENSG00000100395 | 22:41229656-41230138:+      | 0.00114233 | 0.122337907   | 0.164848457     |
| 2672 | ACO2      | ENSG00000100412 | 22:41517631-41518480:+      | 1.20E-06   | 0.113713509   | 0.090933186     |
| 2673 | SREBF2    | ENSG00000198911 | 22:41900498-41902969:+      | 0.02240281 | 0.17401272    | 0.149638639     |
| 2674 | RRP7A     | ENSG00000189306 | 22:42516136-42518004:-      | 0.024577   | 0.112996593   | 0.096496909     |
| 2675 | TLL12     | ENSG00000100304 | 22:43183149-43186892:-      | 0.04578972 | 0.155502827   | 0.13315471      |
| 2676 | KIAA0930  | ENSG00000100364 | 22:45212107-45212264:-      | 9.78E-05   | 0.648855451   | 0.577444247     |
| 2677 | FAM118A   | ENSG00000100376 | 22:45336411-45340385:+      | 0.03367312 | 0.12766367    | 0.113341427     |
| 2678 | TTC38     | ENSG00000075234 | 22:46289561-46289825:+      | 0.02742961 | 0.10483747    | 0.073788521     |
| 2679 | TRMU      | ENSG00000100416 | 22:46355588-46355989:+      | 0.02641851 | 0.46449511    | 0.439527584     |

| S/N  | Gene     | Ensembl ID      | Position of retained intron | p-value    | AD_IR_average | Cont_IR_average |
|------|----------|-----------------|-----------------------------|------------|---------------|-----------------|
| 2680 | TRMU     | ENSG00000100416 | 22:46356072-46356841:+      | 0.02042835 | 0.453190598   | 0.421596325     |
| 2681 | BRD1     | ENSG00000100425 | 22:49777813-49787389:-      | 3.73E-07   | 0.149219185   | 0.101140653     |
| 2682 | TRABD    | ENSG00000170638 | 22:50195040-50197240:+      | 0.01107604 | 0.167132841   | 0.191633195     |
| 2683 | TRABD    | ENSG00000170638 | 22:50197351-50197448:+      | 0.00905231 | 0.212944362   | 0.247838384     |
| 2684 | TUBGCP6  | ENSG00000128159 | 22:50219456-50219643:-      | 8.41E-06   | 0.328019378   | 0.230576865     |
| 2685 | TUBGCP6  | ENSG00000128159 | 22:50219791-50219956:-      | 0.0004794  | 0.122607362   | 0.081779989     |
| 2686 | HDAC10   | ENSG00000100429 | 22:50246966-50247691:-      | 0.00145495 | 0.227357907   | 0.211781539     |
| 2687 | HDAC10   | ENSG00000100429 | 22:50248292-50248365:-      | 0.00219976 | 0.356138444   | 0.300862622     |
| 2688 | HDAC10   | ENSG00000100429 | 22:50248472-50248661:-      | 0.00049245 | 0.321960646   | 0.262564169     |
| 2689 | HDAC10   | ENSG00000100429 | 22:50248751-50248830:-      | 5.82E-05   | 0.35902128    | 0.282625        |
| 2690 | HDAC10   | ENSG00000100429 | 22:50250160-50250770:-      | 0.01100121 | 0.330802512   | 0.271500078     |
| 2691 | MAPK12   | ENSG00000188130 | 22:50253480-50255196:-      | 0.00099971 | 0.168252251   | 0.204365156     |
| 2692 | MAPK12   | ENSG00000188130 | 22:50255694-50255809:-      | 3.82E-06   | 0.143252068   | 0.094589218     |
| 2693 | MAPK12   | ENSG00000188130 | 22:50255881-50256084:-      | 5.38E-05   | 0.316148659   | 0.249493218     |
| 2694 | MAPK12   | ENSG00000188130 | 22:50256646-50256934:-      | 0.00434682 | 0.172797116   | 0.163096508     |
| 2695 | MAPK11   | ENSG00000185386 | 22:50266305-50266539:-      | 9.69E-06   | 0.286027207   | 0.214412052     |
| 2696 | MAPK11   | ENSG00000185386 | 22:50266611-50266933:-      | 5.56E-07   | 0.34840239    | 0.251595455     |
| 2697 | MAPK11   | ENSG00000185386 | 22:50267482-50267568:-      | 0.00052883 | 0.191821012   | 0.159222843     |
| 2698 | PLXNB2   | ENSG00000196576 | 22:50283990-50284131:-      | 0.00759184 | 0.169376677   | 0.145007575     |
| 2699 | PLXNB2   | ENSG00000196576 | 22:50284213-50284572:-      | 0.00043452 | 0.517735146   | 0.454189221     |
| 2700 | PLXNB2   | ENSG00000196576 | 22:50286098-50286172:-      | 0.00409992 | 0.077026676   | 0.102249783     |
| 2701 | PLXNB2   | ENSG00000196576 | 22:50290597-50294718:-      | 0.00564108 | 0.033996961   | 0.050954504     |
| 2702 | DENND6B  | ENSG00000205593 | 22:50313878-50314206:-      | 0.0007682  | 0.554424976   | 0.469400299     |
| 2703 | DENND6B  | ENSG00000205593 | 22:50314272-50314399:-      | 6.17E-07   | 0.248804439   | 0.150091674     |
| 2704 | PPP6R2   | ENSG00000100239 | 22:50439857-50439960:+      | 0.00062132 | 0.111497468   | 0.080075532     |
| 2705 | PPP6R2   | ENSG00000100239 | 22:50441026-50443865:+      | 0.03051873 | 0.465384537   | 0.414481117     |
| 2706 | SBF1     | ENSG00000100241 | 22:50460712-50461158:-      | 1.40E-05   | 0.169757406   | 0.102464024     |
| 2707 | SBF1     | ENSG00000100241 | 22:50466482-50466604:-      | 0.00921446 | 0.067134537   | 0.092880727     |
| 2708 | SBF1     | ENSG00000100241 | 22:50468461-50474785:-      | 0.00651183 | 0.071192827   | 0.094191287     |
| 2709 | LMF2     | ENSG00000100258 | 22:50505153-50505228:-      | 0.00667647 | 0.394050427   | 0.334565753     |
| 2710 | LMF2     | ENSG00000100258 | 22:50505334-50505402:-      | 0.00110678 | 0.38458311    | 0.326326247     |
| 2711 | LMF2     | ENSG00000100258 | 22:50505815-50506034:-      | 0.00117755 | 0.0993609     | 0.07346271      |
| 2712 | LMF2     | ENSG00000100258 | 22:50506213-50506284:-      | 0.01098867 | 0.168050272   | 0.1268973       |
| 2713 | NCAPH2   | ENSG00000205770 | 22:50521036-50521542:+      | 0.00305627 | 0.198685413   | 0.160698303     |
| 2714 | CPT1B    | ENSG00000205560 | 22:50569081-50569335:-      | 0.00505068 | 0.452019402   | 0.404850597     |
| 2715 | CHKB     | ENSG00000100288 | 22:50580271-50580357:-      | 0.00046483 | 0.382644659   | 0.435893455     |
| 2716 | CHKB     | ENSG00000100288 | 22:50581553-50581748:-      | 0.00092558 | 0.583808244   | 0.514392818     |
| 2717 | CHKB     | ENSG00000100288 | 22:50581862-50582248:-      | 0.00149303 | 0.533757634   | 0.593308325     |
| 2718 | MAPK8IP2 | ENSG00000008735 | 22:50606765-50606920:+      | 0.04295977 | 0.111681795   | 0.089481357     |
| 2719 | ARSA     | ENSG00000100299 | 22:50627406-50627555:-      | 0.00123083 | 0.107756448   | 0.147204236     |
| 2720 | SHANK3   | ENSG00000251322 | 22:50715753-50720183:+      | 0.01618366 | 0.067243828   | 0.083904824     |
| 2721 | THUMPD3  | ENSG00000134077 | 3:9380618-9383198:+         | 8.39E-05   | 0.518053963   | 0.457852481     |
| 2722 | THUMPD3  | ENSG00000134077 | 3:9383309-9384211:+         | 3.01E-10   | 0.436996134   | 0.31296599      |
| 2723 | THUMPD3  | ENSG00000134077 | 3:9384335-9384523:+         | 4.21E-09   | 0.428896378   | 0.319810377     |
| 2724 | SETD5    | ENSG00000168137 | 3:9434485-9434823:+         | 1.55E-05   | 0.071657512   | 0.119051927     |
| 2725 | SETD5    | ENSG00000168137 | 3:9435906-9436849:+         | 0.00042394 | 0.110431005   | 0.167329848     |
| 2726 | SETD5    | ENSG00000168137 | 3:9441741-9442127:+         | 0.02735422 | 0.117989116   | 0.1643967       |
| 2727 | SETD5    | ENSG00000168137 | 3:9443417-9445047:+         | 0.03606781 | 0.086383455   | 0.140432423     |
| 2728 | MTMR14   | ENSG00000163719 | 3:9684670-9684887:+         | 5.22E-06   | 0.135072866   | 0.094518355     |
| 2729 | MTMR14   | ENSG00000163719 | 3:9685247-9687820:+         | 1.38E-06   | 0.213065066   | 0.152800913     |
| 2730 | MTMR14   | ENSG00000163719 | 3:9687891-9688695:+         | 1.78E-05   | 0.197712065   | 0.145794061     |
| 2731 | MTMR14   | ENSG00000163719 | 3:9689082-9689963:+         | 1.74E-05   | 0.05638118    | 0.042930762     |
| 2732 | MTMR14   | ENSG00000163719 | 3:9689082-9701789:+         | 0.00757658 | 0.093519811   | 0.065354079     |
| 2733 | MTMR14   | ENSG00000163719 | 3:9690143-9697710:+         | 4.97E-07   | 0.150596932   | 0.101950644     |
| 2734 | MTMR14   | ENSG00000163719 | 3:9697866-9701789:+         | 2.34E-09   | 0.142348776   | 0.099987878     |
| 2735 | OGG1     | ENSG00000114026 | 3:9756621-9756766:+         | 0.00079633 | 0.173087977   | 0.124751464     |
| 2736 | TADA3    | ENSG00000171148 | 3:9789963-9791259:-         | 3.19E-08   | 0.09696247    | 0.167302205     |

| S/N  | Gene      | Ensembl ID      | Position of retained intron | p-value    | AD_IR_average | Cont_IR_average |
|------|-----------|-----------------|-----------------------------|------------|---------------|-----------------|
| 2737 | ARPC4-TTL | ENSG00000250151 | 3:9820741-9825799:+         | 0.02665309 | 0.13259878    | 0.108771119     |
| 2738 | ARPC4-TTL | ENSG00000250151 | 3:9825948-9826996:+         | 0.00516447 | 0.105346891   | 0.083084397     |
| 2739 | ARPC4-TTL | ENSG00000250151 | 3:9829395-9834680:+         | 0.00822507 | 0.235465032   | 0.194010791     |
| 2740 | RPUSD3    | ENSG00000156990 | 3:9839171-9840183:-         | 0.03435159 | 0.333805232   | 0.28994283      |
| 2741 | CRELD1    | ENSG00000163703 | 3:9937672-9938014:+         | 0.03002653 | 0.103677555   | 0.091684218     |
| 2742 | CRELD1    | ENSG00000163703 | 3:9943515-9944364:+         | 0.00096582 | 0.405860756   | 0.348839104     |
| 2743 | VGLL4     | ENSG00000144560 | 3:11559455-11564796:-       | 0.02432949 | 0.277451259   | 0.239990117     |
| 2744 | TAMM41    | ENSG00000144559 | 3:11790581-11807832:-       | 1.61E-06   | 0.193589491   | 0.14100981      |
| 2745 | RAF1      | ENSG00000132155 | 3:12584657-12584846:-       | 0.00936363 | 0.099202696   | 0.083892043     |
| 2746 | NUP210    | ENSG00000132182 | 3:13319979-13321584:-       | 0.00488977 | 0.079183145   | 0.101420525     |
| 2747 | TMEM43    | ENSG00000170876 | 3:14132935-14133738:+       | 0.04923225 | 0.101926646   | 0.148297787     |
| 2748 | XPC       | ENSG00000154767 | 3:14148731-14148813:-       | 0.01525377 | 0.16263113    | 0.133594447     |
| 2749 | XPC       | ENSG00000154767 | 3:14148948-14152334:-       | 0.00244201 | 0.17569097    | 0.131901635     |
| 2750 | MRPS25    | ENSG00000131368 | 3:15052633-15053379:-       | 0.00468753 | 0.077142111   | 0.069340347     |
| 2751 | COLQ      | ENSG00000206561 | 3:15451713-15453828:-       | 0.00052634 | 0.091747582   | 0.054903094     |
| 2752 | COLQ      | ENSG00000206561 | 3:15456019-15456459:-       | 0.0295773  | 0.192829138   | 0.147038213     |
| 2753 | HACL1     | ENSG00000131373 | 3:15560897-15563357:-       | 4.04E-09   | 0.2280397     | 0.170546151     |
| 2754 | MLH1      | ENSG00000076242 | 3:37040294-37042267:+       | 2.13E-06   | 0.128692222   | 0.078572592     |
| 2755 | PLCD1     | ENSG00000187091 | 3:38008163-38008234:-       | 4.80E-05   | 0.184519822   | 0.123739832     |
| 2756 | CTNNB1    | ENSG00000168036 | 3:41239354-41239659:+       | 0.02332132 | 0.729207854   | 0.74541287      |
| 2757 | LZTFL1    | ENSG00000163818 | 3:45826332-45827355:-       | 2.73E-06   | 0.223678178   | 0.149916149     |
| 2758 | PTH1R     | ENSG00000160801 | 3:46901085-46901413:+       | 0.00217483 | 0.260904955   | 0.20430931      |
| 2759 | PTH1R     | ENSG00000160801 | 3:46901480-46901765:+       | 0.01756016 | 0.210975099   | 0.171982752     |
| 2760 | PTH1R     | ENSG00000160801 | 3:46901860-46902525:+       | 0.0157613  | 0.159850359   | 0.126362377     |
| 2761 | NBEAL2    | ENSG00000160796 | 3:47005847-47005945:+       | 0.0453773  | 0.1028539     | 0.126628444     |
| 2762 | NBEAL2    | ENSG00000160796 | 3:47006262-47006332:+       | 0.00226919 | 0.140553337   | 0.099447869     |
| 2763 | NBEAL2    | ENSG00000160796 | 3:47006449-47007065:+       | 0.04503168 | 0.492679366   | 0.439885117     |
| 2764 | PTPN23    | ENSG00000076201 | 3:47405081-47405748:+       | 0.04844963 | 0.12391366    | 0.14827499      |
| 2765 | SCAP      | ENSG00000114650 | 3:47414993-47415097:-       | 6.78E-05   | 0.213888824   | 0.168732348     |
| 2766 | SCAP      | ENSG00000114650 | 3:47415180-47417121:-       | 0.00164775 | 0.247734      | 0.215278581     |
| 2767 | SCAP      | ENSG00000114650 | 3:47418249-47418320:-       | 0.0035727  | 0.177348562   | 0.122961456     |
| 2768 | MAP4      | ENSG00000047849 | 3:47853039-47853162:-       | 0.0003189  | 0.077809935   | 0.055489509     |
| 2769 | PLXNB1    | ENSG00000164050 | 3:48412009-48412237:-       | 0.00298445 | 0.174079511   | 0.138965995     |
| 2770 | PLXNB1    | ENSG00000164050 | 3:48415759-48416030:-       | 0.01147705 | 0.111236517   | 0.080144381     |
| 2771 | PLXNB1    | ENSG00000164050 | 3:48422947-48423504:-       | 0.02927557 | 0.081979631   | 0.106624838     |
| 2772 | ATRIP     | ENSG00000164053 | 3:48465083-48465486:+       | 0.02759417 | 0.267327116   | 0.241382939     |
| 2773 | COL7A1    | ENSG00000114270 | 3:48572421-48572502:-       | 0.00259642 | 0.128913614   | 0.080849914     |
| 2774 | COL7A1    | ENSG00000114270 | 3:48572538-48572670:-       | 0.00033396 | 0.169338101   | 0.109516751     |
| 2775 | COL7A1    | ENSG00000114270 | 3:48573557-48573689:-       | 0.00449315 | 0.095634701   | 0.063025235     |
| 2776 | COL7A1    | ENSG00000114270 | 3:48574550-48574676:-       | 0.01361944 | 0.110945515   | 0.076410773     |
| 2777 | COL7A1    | ENSG00000114270 | 3:48574721-48574796:-       | 0.00689718 | 0.127737345   | 0.083987252     |
| 2778 | CELSR3    | ENSG00000008300 | 3:48645868-48646089:-       | 0.00487615 | 0.382662585   | 0.306662878     |
| 2779 | NCKIPSD   | ENSG00000213672 | 3:48679457-48679574:-       | 0.00820817 | 0.134255389   | 0.116212673     |
| 2780 | DALRD3    | ENSG00000178149 | 3:49016086-49016157:-       | 0.0109137  | 0.615600317   | 0.573767714     |
| 2781 | IMPDH2    | ENSG00000178035 | 3:49024404-49024494:-       | 8.47E-08   | 0.248972309   | 0.183219756     |
| 2782 | IMPDH2    | ENSG00000178035 | 3:49024578-49024658:-       | 3.39E-09   | 0.177871568   | 0.124978377     |
| 2783 | IMPDH2    | ENSG00000178035 | 3:49024802-49024895:-       | 6.31E-08   | 0.15931371    | 0.110914229     |
| 2784 | IMPDH2    | ENSG00000178035 | 3:49025040-49025125:-       | 2.43E-07   | 0.136410876   | 0.090373062     |
| 2785 | IMPDH2    | ENSG00000178035 | 3:49025269-49026323:-       | 0.00029665 | 0.19176563    | 0.147108188     |
| 2786 | IMPDH2    | ENSG00000178035 | 3:49026419-49026518:-       | 1.09E-05   | 0.178435744   | 0.123877884     |
| 2787 | IMPDH2    | ENSG00000178035 | 3:49026609-49026686:-       | 4.47E-05   | 0.201407487   | 0.142450512     |
| 2788 | IMPDH2    | ENSG00000178035 | 3:49026886-49026959:-       | 0.00016389 | 0.295295045   | 0.228654595     |
| 2789 | IMPDH2    | ENSG00000178035 | 3:49027047-49027709:-       | 0.00266032 | 0.228217766   | 0.185941213     |
| 2790 | IMPDH2    | ENSG00000178035 | 3:49028532-49028757:-       | 0.01099625 | 0.403955927   | 0.368131575     |
| 2791 | IMPDH2    | ENSG00000178035 | 3:49028806-49029252:-       | 0.01493656 | 0.365318366   | 0.33941324      |
| 2792 | QARS      | ENSG00000172053 | 3:49098117-49098191:-       | 0.01366166 | 0.125840311   | 0.102908679     |
| 2793 | QARS      | ENSG00000172053 | 3:49099253-49099343:-       | 1.79E-09   | 0.202935709   | 0.104537135     |

| S/N  | Gene     | Ensembl ID      | Position of retained intron | p-value    | AD_IR_average | Cont_IR_average |
|------|----------|-----------------|-----------------------------|------------|---------------|-----------------|
| 2794 | QARS     | ENSG00000172053 | 3:49099431-49099509:-       | 2.09E-10   | 0.179176576   | 0.088072309     |
| 2795 | QARS     | ENSG00000172053 | 3:49099647-49099760:-       | 4.78E-06   | 0.263111123   | 0.179427216     |
| 2796 | LAMB2    | ENSG00000172037 | 3:49123373-49123446:-       | 0.00323979 | 0.119297401   | 0.086705036     |
| 2797 | C3orf62  | ENSG00000188315 | 3:49271445-49274048:-       | 0.01150786 | 0.109864183   | 0.0907412       |
| 2798 | C3orf62  | ENSG00000188315 | 3:49274140-49276426:-       | 0.03271179 | 0.107292924   | 0.092409034     |
| 2799 | APEH     | ENSG00000164062 | 3:49683146-49683236:+       | 0.012746   | 0.095579994   | 0.079317918     |
| 2800 | MST1     | ENSG00000173531 | 3:49684453-49684549:-       | 0.00014385 | 0.303232904   | 0.227235439     |
| 2801 | MST1     | ENSG00000173531 | 3:49684656-49684737:-       | 6.12E-05   | 0.301511373   | 0.214666264     |
| 2802 | MST1     | ENSG00000173531 | 3:49685732-49685859:-       | 0.00136045 | 0.432688966   | 0.333582205     |
| 2803 | RNF123   | ENSG00000164068 | 3:49697939-49698051:+       | 0.0305034  | 0.101940311   | 0.123398201     |
| 2804 | RNF123   | ENSG00000164068 | 3:49713587-49713737:+       | 0.00016489 | 0.202075284   | 0.142068214     |
| 2805 | RNF123   | ENSG00000164068 | 3:49713825-49713909:+       | 0.00022317 | 0.243154305   | 0.178146617     |
| 2806 | MON1A    | ENSG00000164077 | 3:49909154-49909252:-       | 0.00111585 | 0.10507184    | 0.13996791      |
| 2807 | RBM5     | ENSG00000003756 | 3:50109688-50110378:+       | 0.00059493 | 0.092753062   | 0.079014627     |
| 2808 | RBM5     | ENSG00000003756 | 3:50110463-50110678:+       | 0.00237659 | 0.135086807   | 0.115768249     |
| 2809 | RBM5     | ENSG00000003756 | 3:50110770-50113382:+       | 8.20E-05   | 0.218214246   | 0.164421717     |
| 2810 | RBM5     | ENSG00000003756 | 3:50117171-50117249:+       | 0.00010915 | 0.199566789   | 0.146351568     |
| 2811 | IFRD2    | ENSG00000214706 | 3:50290294-50290387:-       | 0.03809235 | 0.186693112   | 0.212530134     |
| 2812 | NPRL2    | ENSG00000114388 | 3:50347901-50348123:-       | 0.04090975 | 0.44958128    | 0.41625387      |
| 2813 | NPRL2    | ENSG00000114388 | 3:50348410-50348526:-       | 0.01421702 | 0.330266878   | 0.292861405     |
| 2814 | NPRL2    | ENSG00000114388 | 3:50348563-50348684:-       | 0.03031125 | 0.209342829   | 0.185521173     |
| 2815 | NPRL2    | ENSG00000114388 | 3:50349010-50349385:-       | 0.00021893 | 0.303063171   | 0.250104065     |
| 2816 | NPRL2    | ENSG00000114388 | 3:50349494-50349664:-       | 7.07E-05   | 0.479427585   | 0.408958273     |
| 2817 | NPRL2    | ENSG00000114388 | 3:50349833-50349930:-       | 5.32E-05   | 0.297888756   | 0.23776749      |
| 2818 | CACNA2D2 | ENSG00000007402 | 3:50366338-50366577:-       | 0.04056258 | 0.243324446   | 0.234353653     |
| 2819 | PCBP4    | ENSG00000090097 | 3:51961304-51962809:-       | 0.02930475 | 0.117664639   | 0.098082588     |
| 2820 | PCBP4    | ENSG00000090097 | 3:51962088-51962809:-       | 0.04153838 | 0.152640144   | 0.128613734     |
| 2821 | PCBP4    | ENSG00000090097 | 3:51962892-51967325:-       | 5.81E-05   | 0.676355463   | 0.589570688     |
| 2822 | ABHD14A  | ENSG00000114786 | 3:51985946-51986254:+       | 0.01150765 | 0.215624116   | 0.172932486     |
| 2823 | ABHD14A  | ENSG00000114786 | 3:51986504-51986604:+       | 0.00092445 | 0.384781768   | 0.312663597     |
| 2824 | ABHD14A  | ENSG00000114786 | 3:51987453-51987555:+       | 6.34E-08   | 0.292275702   | 0.18765167      |
| 2825 | ABHD14A  | ENSG00000114786 | 3:51987624-51988523:+       | 0.0007119  | 0.345938957   | 0.273197883     |
| 2826 | ABHD14A  | ENSG00000114786 | 3:51988603-51988765:+       | 0.00086663 | 0.18989889    | 0.142848403     |
| 2827 | TWF2     | ENSG00000247596 | 3:52229201-52229660:-       | 6.93E-05   | 0.159511473   | 0.113819161     |
| 2828 | PPM1M    | ENSG00000164088 | 3:52249063-52249173:+       | 0.04281646 | 0.167785246   | 0.134602575     |
| 2829 | NT5DC2   | ENSG00000168268 | 3:52527375-52527616:-       | 0.01709261 | 0.136664728   | 0.106295014     |
| 2830 | NT5DC2   | ENSG00000168268 | 3:52527718-52527828:-       | 0.02263901 | 0.121035884   | 0.095098942     |
| 2831 | NT5DC2   | ENSG00000168268 | 3:52527931-52528012:-       | 0.04841021 | 0.096283395   | 0.077676825     |
| 2832 | NT5DC2   | ENSG00000168268 | 3:52529334-52533505:-       | 0.04852635 | 0.171397777   | 0.156336647     |
| 2833 | CCDC66   | ENSG00000180376 | 3:56619527-56619776:+       | 0.00645369 | 0.106161204   | 0.086836295     |
| 2834 | PXK      | ENSG00000168297 | 3:58410159-58412900:+       | 0.00849739 | 0.099010301   | 0.079784864     |
| 2835 | PSMD6    | ENSG00000163636 | 3:64022523-64023274:-       | 9.34E-06   | 0.194523404   | 0.1432579       |
| 2836 | CPOX     | ENSG00000080819 | 3:98588854-98590631:-       | 0.0002195  | 0.133737766   | 0.189337742     |
| 2837 | TOMM70   | ENSG00000154174 | 3:100365717-100368043:-     | 0.0475016  | 0.08462309    | 0.110908378     |
| 2838 | CD47     | ENSG00000196776 | 3:108047292-108051938:-     | 8.65E-06   | 0.100869205   | 0.078824023     |
| 2839 | CD47     | ENSG00000196776 | 3:108050602-108051938:-     | 0.00030327 | 0.238375137   | 0.16013666      |
| 2840 | IFT57    | ENSG00000114446 | 3:108162655-108163662:-     | 0.02228599 | 0.193919376   | 0.16314336      |
| 2841 | TMEM39A  | ENSG00000176142 | 3:119432214-119434761:-     | 0.00049867 | 0.33700232    | 0.251188168     |
| 2842 | CCDC58   | ENSG00000160124 | 3:122363027-122368175:-     | 0.02146189 | 0.063535706   | 0.065638501     |
| 2843 | KLF15    | ENSG00000163884 | 3:126343895-126351840:-     | 0.02486413 | 0.208373101   | 0.163857353     |
| 2844 | TPRA1    | ENSG00000163870 | 3:127573788-127575184:-     | 9.76E-06   | 0.231465463   | 0.168959913     |
| 2845 | TPRA1    | ENSG00000163870 | 3:127576050-127576616:-     | 0.00016622 | 0.379291232   | 0.316976883     |
| 2846 | TPRA1    | ENSG00000163870 | 3:127576696-127576820:-     | 0.00104028 | 0.244277146   | 0.200265799     |
| 2847 | PODXL2   | ENSG00000114631 | 3:127669202-127671433:+     | 0.02100757 | 0.136035252   | 0.1145055       |
| 2848 | ABTB1    | ENSG00000114626 | 3:127677563-127677675:+     | 0.01060058 | 0.22362526    | 0.264211286     |
| 2849 | ACAD9    | ENSG00000177646 | 3:128909421-128910020:+     | 0.00329584 | 0.246196293   | 0.191566408     |
| 2850 | IFT122   | ENSG00000163913 | 3:129519732-129520175:+     | 0.03414294 | 0.132304805   | 0.103540449     |



| S/N  | Gene     | Ensembl ID      | Position of retained intron | p-value    | AD_IR_average | Cont_IR_average |
|------|----------|-----------------|-----------------------------|------------|---------------|-----------------|
| 2851 | TF       | ENSG00000091513 | 3:133777238-133778585:+     | 0.04491647 | 0.133989498   | 0.120323912     |
| 2852 | CEP70    | ENSG00000114107 | 3:138495076-138498030:-     | 2.17E-06   | 0.508817488   | 0.415913364     |
| 2853 | CEP70    | ENSG00000114107 | 3:138498110-138500109:-     | 7.41E-08   | 0.304974039   | 0.216709994     |
| 2854 | MRPS22   | ENSG00000175110 | 3:139351060-139352646:+     | 5.96E-05   | 0.169117824   | 0.129948844     |
| 2855 | MRPS22   | ENSG00000175110 | 3:139352792-139355681:+     | 8.13E-05   | 0.524254244   | 0.435432247     |
| 2856 | MRPS22   | ENSG00000175110 | 3:139355790-139356918:+     | 1.92E-06   | 0.555618866   | 0.408499588     |
| 2857 | ZIC1     | ENSG00000152977 | 3:147412681-147413353:+     | 0.0009021  | 0.107790302   | 0.082674368     |
| 2858 | PFN2     | ENSG00000070087 | 3:149966264-149968357:-     | 0.01181517 | 0.035741214   | 0.034439956     |
| 2859 | CCNL1    | ENSG00000163660 | 3:157148589-157149286:-     | 0.03707203 | 0.104839417   | 0.085231152     |
| 2860 | ACTL6A   | ENSG00000136518 | 3:179580701-179580893:+     | 0.00082122 | 0.150357496   | 0.10379149      |
| 2861 | ACTL6A   | ENSG00000136518 | 3:179581008-179581139:+     | 1.01E-06   | 0.185597723   | 0.11105079      |
| 2862 | ACTL6A   | ENSG00000136518 | 3:179581220-179583352:+     | 0.00020236 | 0.183663838   | 0.138312365     |
| 2863 | ACTL6A   | ENSG00000136518 | 3:179583448-179586545:+     | 0.01419695 | 0.257313743   | 0.219573087     |
| 2864 | ACTL6A   | ENSG00000136518 | 3:179586632-179587929:+     | 1.69E-06   | 0.216012116   | 0.153203621     |
| 2865 | YEATS2   | ENSG00000163872 | 3:183804188-183806865:+     | 0.0147277  | 0.153009707   | 0.210209044     |
| 2866 | YEATS2   | ENSG00000163872 | 3:183807092-183808029:+     | 0.00116768 | 0.216384126   | 0.304219336     |
| 2867 | ABCC5    | ENSG00000114770 | 3:183942916-183945849:-     | 0.00040914 | 0.107466741   | 0.072893378     |
| 2868 | ABCC5    | ENSG00000114770 | 3:183987917-183988571:-     | 1.54E-05   | 0.08246914    | 0.143311839     |
| 2869 | EIF2B5   | ENSG00000145191 | 3:184140157-184140417:+     | 0.0375534  | 0.147688271   | 0.193145009     |
| 2870 | DVL3     | ENSG00000161202 | 3:184164931-184165112:+     | 0.04675285 | 0.316732963   | 0.356138987     |
| 2871 | DVL3     | ENSG00000161202 | 3:184165206-184165421:+     | 0.01864148 | 0.219503017   | 0.192446086     |
| 2872 | DVL3     | ENSG00000161202 | 3:184166522-184166605:+     | 0.00721247 | 0.134263428   | 0.110391652     |
| 2873 | ABCF3    | ENSG00000161204 | 3:184186280-184186506:+     | 0.0109019  | 0.11563477    | 0.097288244     |
| 2874 | ABCF3    | ENSG00000161204 | 3:184192689-184192804:+     | 1.32E-05   | 0.073861893   | 0.102948626     |
| 2875 | ALG3     | ENSG00000214160 | 3:184242676-184242812:-     | 0.00023485 | 0.1017612     | 0.069770653     |
| 2876 | ALG3     | ENSG00000214160 | 3:184242957-184243553:-     | 0.01265428 | 0.123970106   | 0.098162531     |
| 2877 | ALG3     | ENSG00000214160 | 3:184243996-184244600:-     | 0.03589333 | 0.089499254   | 0.071645108     |
| 2878 | ECE2     | ENSG00000145194 | 3:184290667-184290792:+     | 0.03831162 | 0.178223157   | 0.168178588     |
| 2879 | CLCN2    | ENSG00000114859 | 3:184347021-184352012:-     | 0.00225676 | 0.275287134   | 0.227335127     |
| 2880 | CLCN2    | ENSG00000114859 | 3:184352117-184352292:-     | 0.00952532 | 0.193784872   | 0.154731409     |
| 2881 | CLCN2    | ENSG00000114859 | 3:184352331-184352442:-     | 0.04562226 | 0.15526016    | 0.126300613     |
| 2882 | CLCN2    | ENSG00000114859 | 3:184354314-184354547:-     | 0.03130488 | 0.091510991   | 0.067733715     |
| 2883 | CHRD     | ENSG00000090539 | 3:184382530-184382633:+     | 0.01183731 | 0.105672243   | 0.144735473     |
| 2884 | CHRD     | ENSG00000090539 | 3:184386755-184386844:+     | 0.02120792 | 0.112424582   | 0.099718656     |
| 2885 | TNK2     | ENSG00000061938 | 3:195868709-195870113:-     | 0.00210768 | 0.187607761   | 0.208089401     |
| 2886 | TCTEX1D2 | ENSG00000213123 | 3:196291374-196296005:-     | 0.00069587 | 0.119789722   | 0.089129        |
| 2887 | TCTEX1D2 | ENSG00000213123 | 3:196296069-196306942:-     | 0.04028505 | 0.137816534   | 0.117927057     |
| 2888 | BDH1     | ENSG00000161267 | 3:197522781-197532411:-     | 0.0077271  | 0.07412813    | 0.099485574     |
| 2889 | BDH1     | ENSG00000161267 | 3:197533561-197546360:-     | 0.01179219 | 0.182506316   | 0.223273423     |
| 2890 | PIGG     | ENSG00000174227 | 4:516185-521055:+           | 0.00052148 | 0.071551228   | 0.116717338     |
| 2891 | PIGG     | ENSG00000174227 | 4:527230-530435:+           | 0.00415701 | 0.183601837   | 0.215394221     |
| 2892 | PIGG     | ENSG00000174227 | 4:530745-533817:+           | 0.03487811 | 0.291445201   | 0.313377338     |
| 2893 | PCGF3    | ENSG00000185619 | 4:731110-733671:+           | 0.00010387 | 0.064135557   | 0.105343235     |
| 2894 | PCGF3    | ENSG00000185619 | 4:744688-761278:+           | 5.13E-06   | 0.080266212   | 0.133677192     |
| 2895 | PCGF3    | ENSG00000185619 | 4:761416-764983:+           | 0.00059721 | 0.1202491     | 0.175415071     |
| 2896 | PCGF3    | ENSG00000185619 | 4:765064-766031:+           | 0.00041641 | 0.079407781   | 0.124198388     |
| 2897 | GAK      | ENSG00000178950 | 4:868685-870710:-           | 3.46E-05   | 0.137337074   | 0.094517311     |
| 2898 | TMEM175  | ENSG00000127419 | 4:951258-951645:+           | 0.00094065 | 0.044405372   | 0.032186016     |
| 2899 | TMEM175  | ENSG00000127419 | 4:951717-952366:+           | 0.01265878 | 0.11871189    | 0.093236061     |
| 2900 | TMEM175  | ENSG00000127419 | 4:952450-953189:+           | 0.00360582 | 0.101607085   | 0.075877418     |
| 2901 | DGKQ     | ENSG00000145214 | 4:962082-962434:-           | 0.00296862 | 0.23662272    | 0.178921034     |
| 2902 | IDUA     | ENSG00000127415 | 4:1003625-1004011:+         | 9.78E-05   | 0.169743532   | 0.105067006     |
| 2903 | SLBP     | ENSG00000163950 | 4:1694840-1696201:-         | 0.00499028 | 0.096698912   | 0.079463113     |
| 2904 | TMEM129  | ENSG00000168936 | 4:1717428-1717515:-         | 0.00755999 | 0.353655341   | 0.293522078     |
| 2905 | TMEM129  | ENSG00000168936 | 4:1717675-1718151:-         | 0.00799532 | 0.476880976   | 0.41893126      |
| 2906 | MXD4     | ENSG00000123933 | 4:2255294-2257981:-         | 0.04383175 | 0.297807783   | 0.294921819     |
| 2907 | ZFYVE28  | ENSG00000159733 | 4:2270856-2271310:-         | 0.00225625 | 0.511644073   | 0.44835213      |

| S/N  | Gene      | Ensembl ID      | Position of retained intron | p-value    | AD_IR_average | Cont_IR_average |
|------|-----------|-----------------|-----------------------------|------------|---------------|-----------------|
| 2908 | SH3BP2    | ENSG00000087266 | 4:2825196-2827229:+         | 0.0067381  | 0.122236765   | 0.088963112     |
| 2909 | ADD1      | ENSG00000087274 | 4:2905015-2907742:+         | 0.02741207 | 0.111606011   | 0.089187917     |
| 2910 | MFSD10    | ENSG00000109736 | 4:2930953-2931060:-         | 0.01429578 | 0.408228768   | 0.340516234     |
| 2911 | MFSD10    | ENSG00000109736 | 4:2931150-2931226:-         | 0.02904606 | 0.21380819    | 0.170377842     |
| 2912 | MFSD10    | ENSG00000109736 | 4:2931465-2931554:-         | 0.00098254 | 0.29529722    | 0.241231091     |
| 2913 | MFSD10    | ENSG00000109736 | 4:2931663-2931824:-         | 0.02706089 | 0.421551061   | 0.383718        |
| 2914 | MFSD10    | ENSG00000109736 | 4:2931936-2932044:-         | 6.39E-07   | 0.246164122   | 0.173539978     |
| 2915 | NOP14     | ENSG00000087269 | 4:2945229-2946411:-         | 0.00146185 | 0.09142239    | 0.130135217     |
| 2916 | NOP14     | ENSG00000087269 | 4:2953645-2954423:-         | 5.46E-06   | 0.070189101   | 0.114149704     |
| 2917 | GRK4      | ENSG00000125388 | 4:3028001-3029200:+         | 0.00138054 | 0.202319695   | 0.160287532     |
| 2918 | RGS12     | ENSG00000159788 | 4:3417541-3420641:+         | 0.01003407 | 0.453867939   | 0.399577364     |
| 2919 | RGS12     | ENSG00000159788 | 4:3420718-3422375:+         | 0.03293104 | 0.230827626   | 0.196456557     |
| 2920 | LYAR      | ENSG00000145220 | 4:4268615-4273582:-         | 0.04517141 | 0.115020446   | 0.091003203     |
| 2921 | STX18     | ENSG00000168818 | 4:4420129-4420863:-         | 0.00019024 | 0.1526591     | 0.112152583     |
| 2922 | CRMP1     | ENSG00000072832 | 4:5836906-5839521:-         | 4.44E-05   | 0.112488007   | 0.079804116     |
| 2923 | WFS1      | ENSG00000109501 | 4:6295189-6300656:+         | 0.00031813 | 0.298194468   | 0.23105249      |
| 2924 | BOD1L1    | ENSG00000038219 | 4:13581054-13581131:-       | 0.00057959 | 0.123903378   | 0.075026691     |
| 2925 | CC2D2A    | ENSG00000048342 | 4:15596207-15597406:+       | 0.01640613 | 0.166205295   | 0.127447707     |
| 2926 | CC2D2A    | ENSG00000048342 | 4:15599706-15601236:+       | 2.39E-05   | 0.244062568   | 0.169785745     |
| 2927 | ANAPC4    | ENSG00000053900 | 4:25394905-25396663:+       | 0.0009846  | 0.252884385   | 0.1982073       |
| 2928 | ANAPC4    | ENSG00000053900 | 4:25396899-25402970:+       | 0.01131939 | 0.097325115   | 0.075456578     |
| 2929 | WDR19     | ENSG00000157796 | 4:39273061-39274807:+       | 0.00264187 | 0.580634573   | 0.562649805     |
| 2930 | WDR19     | ENSG00000157796 | 4:39274958-39277019:+       | 3.66E-06   | 0.166380952   | 0.134041178     |
| 2931 | GUF1      | ENSG00000151806 | 4:44695734-44697407:+       | 0.00148997 | 0.269499329   | 0.203084656     |
| 2932 | NFXL1     | ENSG00000170448 | 4:47851148-47851855:-       | 0.00839696 | 0.095392615   | 0.067384908     |
| 2933 | OCIAD1    | ENSG00000109180 | 4:48851975-48857212:+       | 4.30E-05   | 0.086374477   | 0.056686157     |
| 2934 | OCIAD1    | ENSG00000109180 | 4:48851975-48860724:+       | 0.00183903 | 0.06458046    | 0.041387888     |
| 2935 | OCIAD1    | ENSG00000109180 | 4:48857365-48860724:+       | 8.29E-07   | 0.090005438   | 0.063292473     |
| 2936 | FIP1L1    | ENSG00000145216 | 4:53458790-53459301:+       | 0.00109417 | 0.09060476    | 0.108280368     |
| 2937 | TMEM165   | ENSG00000134851 | 4:55417247-55417802:+       | 0.00147684 | 0.083065188   | 0.106146144     |
| 2938 | TMEM165   | ENSG00000134851 | 4:55417985-55424537:+       | 0.03482877 | 0.070926214   | 0.072442221     |
| 2939 | EXOC1     | ENSG00000090989 | 4:55891422-55892634:+       | 0.00251262 | 0.116032745   | 0.078732562     |
| 2940 | AASDH     | ENSG00000157426 | 4:56343684-56345126:-       | 0.00030312 | 0.298775548   | 0.240064144     |
| 2941 | YTHDC1    | ENSG00000083896 | 4:68318862-68320122:-       | 0.02007206 | 0.219694946   | 0.189554665     |
| 2942 | RUFY3     | ENSG00000018189 | 4:70800205-70802955:+       | 3.32E-05   | 0.342486952   | 0.267168305     |
| 2943 | RUFY3     | ENSG00000018189 | 4:70802983-70804347:+       | 2.88E-05   | 0.225701038   | 0.176611743     |
| 2944 | RUFY3     | ENSG00000018189 | 4:70804416-70806515:+       | 3.73E-07   | 0.199824045   | 0.143874001     |
| 2945 | RCHY1     | ENSG00000163743 | 4:75490701-75491610:-       | 0.00827428 | 0.120454701   | 0.091845055     |
| 2946 | RCHY1     | ENSG00000163743 | 4:75491637-75491723:-       | 0.00019156 | 0.1046265     | 0.069575446     |
| 2947 | ART3      | ENSG00000156219 | 4:76100320-76100794:+       | 0.00679612 | 0.250484      | 0.180439582     |
| 2948 | MANBA     | ENSG00000109323 | 4:102632281-102634787:-     | 0.00918577 | 0.1413702     | 0.112836044     |
| 2949 | HADH      | ENSG00000138796 | 4:108027760-108033175:+     | 0.01039136 | 0.116023676   | 0.085526019     |
| 2950 | OSTC      | ENSG00000198856 | 4:108650794-108655563:+     | 9.78E-10   | 0.128342338   | 0.06883941      |
| 2951 | LARP7     | ENSG00000174720 | 4:112646955-112647033:+     | 0.00079886 | 0.069216754   | 0.114177587     |
| 2952 | LARP7     | ENSG00000174720 | 4:112654159-112657246:+     | 5.88E-07   | 0.108915128   | 0.072506906     |
| 2953 | RP11-33B1 | ENSG00000245958 | 4:119550443-119551887:+     | 2.19E-05   | 0.684759683   | 0.592932506     |
| 2954 | EXOSC9    | ENSG00000123737 | 4:121816447-121816771:+     | 0.00739169 | 0.351752046   | 0.285466299     |
| 2955 | CLGN      | ENSG00000153132 | 4:140389304-140390627:-     | 0.00019903 | 0.123850019   | 0.071284583     |
| 2956 | PLRG1     | ENSG00000171566 | 4:154536744-154537285:-     | 0.0029085  | 0.113495882   | 0.089750782     |
| 2957 | ETFDH     | ENSG00000171503 | 4:158690425-158695496:+     | 0.00163085 | 0.106744341   | 0.079475662     |
| 2958 | ETFDH     | ENSG00000171503 | 4:158697699-158698986:+     | 0.00183844 | 0.179612843   | 0.124649331     |
| 2959 | ETFDH     | ENSG00000171503 | 4:158699130-158703422:+     | 0.005459   | 0.103802584   | 0.078348331     |
| 2960 | PPID      | ENSG00000171497 | 4:158710670-158710761:-     | 5.37E-07   | 0.10558364    | 0.168855217     |
| 2961 | LRP2BP    | ENSG00000109771 | 4:185367245-185370639:-     | 9.73E-17   | 0.365773537   | 0.212754536     |
| 2962 | LRP2BP    | ENSG00000109771 | 4:185370814-185372855:-     | 1.05E-09   | 0.446755195   | 0.333917195     |
| 2963 | LRP2BP    | ENSG00000109771 | 4:185373079-185374134:-     | 1.96E-18   | 0.195215156   | 0.096859196     |
| 2964 | LRP2BP    | ENSG00000109771 | 4:185374240-185374318:-     | 2.45E-11   | 0.29717369    | 0.194911356     |

| S/N  | Gene     | Ensembl ID      | Position of retained intron | p-value    | AD_IR_average | Cont_IR_average |
|------|----------|-----------------|-----------------------------|------------|---------------|-----------------|
| 2965 | LRP2BP   | ENSG00000109771 | 4:185374461-185375612:-     | 0.00379337 | 0.293285455   | 0.224968238     |
| 2966 | LRP2BP   | ENSG00000109771 | 4:185375726-185376908:-     | 2.81E-13   | 0.28991444    | 0.173954064     |
| 2967 | ANKRD37  | ENSG00000186352 | 4:185396950-185397149:+     | 0.04605942 | 0.148959024   | 0.127678864     |
| 2968 | UFSP2    | ENSG00000109775 | 4:185400478-185403493:-     | 0.0137283  | 0.098793879   | 0.079744361     |
| 2969 | PDCD6    | ENSG00000249915 | 5:306754-311292:+           | 0.0498454  | 0.043030071   | 0.036701598     |
| 2970 | NSUN2    | ENSG00000037474 | 5:6600232-6602460:-         | 7.21E-05   | 0.180824783   | 0.135906245     |
| 2971 | NSUN2    | ENSG00000037474 | 5:6604685-6605272:-         | 0.0004335  | 0.389360622   | 0.320576201     |
| 2972 | NSUN2    | ENSG00000037474 | 5:6606912-6607199:-         | 0.04321595 | 0.401598049   | 0.358023058     |
| 2973 | TRIO     | ENSG00000038382 | 5:14462925-14465544:+       | 0.00159495 | 0.090117994   | 0.122538832     |
| 2974 | ANKH     | ENSG00000154122 | 5:14711310-14712873:-       | 0.00855169 | 0.189630143   | 0.160996703     |
| 2975 | ANKH     | ENSG00000154122 | 5:14713667-14716705:-       | 0.00166937 | 0.092619782   | 0.136389478     |
| 2976 | CDH10    | ENSG00000040731 | 5:24488153-24491575:-       | 0.01371876 | 0.20526359    | 0.151783406     |
| 2977 | CDH10    | ENSG00000040731 | 5:24491827-24492816:-       | 3.23E-07   | 0.097217626   | 0.048502641     |
| 2978 | CDH10    | ENSG00000040731 | 5:24492925-24498397:-       | 0.01037698 | 0.102677595   | 0.075630581     |
| 2979 | CDH10    | ENSG00000040731 | 5:24505248-24509565:-       | 0.02205281 | 0.088552468   | 0.087715539     |
| 2980 | WDR70    | ENSG00000082068 | 5:37721215-37722854:+       | 1.07E-06   | 0.127611785   | 0.078063319     |
| 2981 | WDR70    | ENSG00000082068 | 5:37722934-37724933:+       | 9.94E-06   | 0.130743437   | 0.086764844     |
| 2982 | DHX29    | ENSG00000067248 | 5:55269637-55270411:-       | 0.01651344 | 0.140134077   | 0.109299329     |
| 2983 | DHX29    | ENSG00000067248 | 5:55270487-55270577:-       | 0.01645948 | 0.096603732   | 0.07022828      |
| 2984 | SKIV2L2  | ENSG00000039123 | 5:55422982-55424719:+       | 4.36E-12   | 0.151606278   | 0.098508838     |
| 2985 | GPBP1    | ENSG00000062194 | 5:57236032-57246299:+       | 0.00305261 | 0.061869127   | 0.07474477      |
| 2986 | DIMT1    | ENSG00000086189 | 5:62389052-62390875:-       | 0.00744086 | 0.71910522    | 0.669374779     |
| 2987 | DIMT1    | ENSG00000086189 | 5:62392234-62392925:-       | 0.00301191 | 0.089504298   | 0.058473864     |
| 2988 | PPWD1    | ENSG00000113593 | 5:65579613-65583037:+       | 0.0120654  | 0.235423427   | 0.196672926     |
| 2989 | PPWD1    | ENSG00000113593 | 5:65583219-65585013:+       | 0.00320054 | 0.135346168   | 0.107238687     |
| 2990 | PPWD1    | ENSG00000113593 | 5:65585095-65585998:+       | 0.00025198 | 0.150198782   | 0.113644091     |
| 2991 | PPWD1    | ENSG00000113593 | 5:65586181-65587252:+       | 1.72E-05   | 0.304585183   | 0.232459281     |
| 2992 | CCNB1    | ENSG00000134057 | 5:69175537-69177238:+       | 0.00672829 | 0.163292461   | 0.121041729     |
| 2993 | CCNB1    | ENSG00000134057 | 5:69177349-69177523:+       | 0.04138031 | 0.26836591    | 0.229914386     |
| 2994 | ANKRA2   | ENSG00000164331 | 5:73552852-73553405:-       | 2.72E-05   | 0.409875524   | 0.293518688     |
| 2995 | ANKRA2   | ENSG00000164331 | 5:73553486-73554321:-       | 1.81E-07   | 0.300612759   | 0.17926784      |
| 2996 | GFM2     | ENSG00000164347 | 5:74721783-74722378:-       | 0.003639   | 0.148401412   | 0.120366906     |
| 2997 | GFM2     | ENSG00000164347 | 5:74722561-74725639:-       | 0.00131943 | 0.182236366   | 0.134269647     |
| 2998 | POC5     | ENSG00000152359 | 5:75674578-75677773:-       | 0.00067215 | 0.165790288   | 0.124201717     |
| 2999 | ZCCHC9   | ENSG00000131732 | 5:81308711-81308945:+       | 3.79E-05   | 0.091107354   | 0.126985075     |
| 3000 | SSBP2    | ENSG00000145687 | 5:81442723-81446867:-       | 1.69E-08   | 0.15903894    | 0.079877096     |
| 3001 | SSBP2    | ENSG00000145687 | 5:81446922-81448789:-       | 1.42E-07   | 0.113641167   | 0.054652514     |
| 3002 | CCNH     | ENSG00000134480 | 5:87394484-87395043:-       | 2.41E-05   | 0.102127789   | 0.076711834     |
| 3003 | CETN3    | ENSG00000153140 | 5:90394107-90399357:-       | 0.01545152 | 0.092006896   | 0.066770458     |
| 3004 | CHD1     | ENSG00000153922 | 5:98860068-98863407:-       | 0.00554521 | 0.151145761   | 0.108398808     |
| 3005 | YTHDC2   | ENSG00000047188 | 5:113593390-113593481:+     | 0.00034664 | 0.640112976   | 0.52882774      |
| 3006 | FEM1C    | ENSG00000145780 | 5:115543683-115544522:-     | 0.02338443 | 0.105473982   | 0.148707555     |
| 3007 | ZNF608   | ENSG00000168916 | 5:124639214-124641251:-     | 0.00056356 | 0.178927171   | 0.128330626     |
| 3008 | GRAMD3   | ENSG00000155324 | 5:126488892-126492914:+     | 0.02833082 | 0.118848099   | 0.134829983     |
| 3009 | LMNB1    | ENSG00000113368 | 5:126826107-126832693:+     | 0.003653   | 0.120865344   | 0.090355877     |
| 3010 | P4HA2    | ENSG00000072682 | 5:132198380-132198878:-     | 4.71E-06   | 0.387793829   | 0.260008977     |
| 3011 | RAD50    | ENSG00000113522 | 5:132609209-132609282:+     | 0.0047812  | 0.121516082   | 0.094207918     |
| 3012 | Sep-08   | ENSG00000164402 | 5:132758556-132760801:-     | 0.00222876 | 0.14455831    | 0.133658487     |
| 3013 | SHROOM1  | ENSG00000164403 | 5:132823522-132823622:-     | 0.00111659 | 0.084322168   | 0.109728597     |
| 3014 | LEAP2    | ENSG00000164406 | 5:132874089-132874409:+     | 0.03271313 | 0.098606541   | 0.077976326     |
| 3015 | H2AFY    | ENSG00000113648 | 5:135346057-135350822:-     | 0.00300275 | 0.056953993   | 0.052528684     |
| 3016 | CTNNA1   | ENSG00000044115 | 5:138930935-138932577:+     | 0.00745731 | 0.133444734   | 0.111326865     |
| 3017 | NRG2     | ENSG00000158458 | 5:139848697-139851603:-     | 0.00116568 | 0.200379326   | 0.16737413      |
| 3018 | ANKHD1-E | ENSG00000254996 | 5:140549076-140549233:+     | 2.28E-06   | 0.160270854   | 0.118650306     |
| 3019 | APBB3    | ENSG00000113108 | 5:140558821-140560312:-     | 2.14E-05   | 0.331618476   | 0.266472858     |
| 3020 | APBB3    | ENSG00000113108 | 5:140560504-140560638:-     | 0.00027827 | 0.21722772    | 0.170864377     |
| 3021 | APBB3    | ENSG00000113108 | 5:140560754-140561017:-     | 0.00073438 | 0.25885755    | 0.210943088     |

| S/N  | Gene     | Ensembl ID      | Position of retained intron | p-value    | AD_IR_average | Cont_IR_average |
|------|----------|-----------------|-----------------------------|------------|---------------|-----------------|
| 3022 | APBB3    | ENSG00000113108 | 5:140561701-140561843:-     | 0.00201393 | 0.330329563   | 0.405321844     |
| 3023 | AC011380 | ENSG00000283155 | 5:140562723-140563593:-     | 0.01953191 | 0.652731695   | 0.608559052     |
| 3024 | APBB3    | ENSG00000113108 | 5:140563915-140564196:-     | 2.29E-07   | 0.699806476   | 0.574389299     |
| 3025 | TMCO6    | ENSG00000113119 | 5:140643041-140643563:+     | 0.00192132 | 0.241431343   | 0.190802318     |
| 3026 | TMCO6    | ENSG00000113119 | 5:140643675-140643779:+     | 0.0043332  | 0.228414717   | 0.182859034     |
| 3027 | TMCO6    | ENSG00000113119 | 5:140643966-140644099:+     | 0.01028209 | 0.298583723   | 0.250934443     |
| 3028 | TMCO6    | ENSG00000113119 | 5:140644194-140644572:+     | 0.0001062  | 0.340503561   | 0.265162094     |
| 3029 | TMCO6    | ENSG00000113119 | 5:140644740-140644984:+     | 0.00149985 | 0.3600995     | 0.30083441      |
| 3030 | WDR55    | ENSG00000120314 | 5:140668502-140668611:+     | 0.01498065 | 0.071860499   | 0.099288988     |
| 3031 | HDAC3    | ENSG00000171720 | 5:141628187-141628558:-     | 0.00403785 | 0.088172544   | 0.07444169      |
| 3032 | HDAC3    | ENSG00000171720 | 5:141629306-141629683:-     | 0.0079869  | 0.26795858    | 0.245106831     |
| 3033 | HDAC3    | ENSG00000171720 | 5:141629739-141629859:-     | 0.00829586 | 0.432984915   | 0.383178532     |
| 3034 | HDAC3    | ENSG00000171720 | 5:141630125-141634810:-     | 0.03472183 | 0.2755795     | 0.231347052     |
| 3035 | KIAA0141 | ENSG00000081791 | 5:141930074-141930177:+     | 0.00161948 | 0.10893671    | 0.073263081     |
| 3036 | LARS     | ENSG00000133706 | 5:146140261-146142871:-     | 0.00127171 | 0.094287438   | 0.143748319     |
| 3037 | LARS     | ENSG00000133706 | 5:146143084-146143411:-     | 0.00935946 | 0.08075145    | 0.118216212     |
| 3038 | ABLIM3   | ENSG00000173210 | 5:149249844-149250446:+     | 0.01515842 | 0.143086187   | 0.115038998     |
| 3039 | ABLIM3   | ENSG00000173210 | 5:149250505-149251358:+     | 0.01390473 | 0.128886417   | 0.101885319     |
| 3040 | ABLIM3   | ENSG00000173210 | 5:149251419-149252200:+     | 0.00102512 | 0.17518595    | 0.128775526     |
| 3041 | ABLIM3   | ENSG00000173210 | 5:149252208-149252756:+     | 0.03110301 | 0.290052439   | 0.247337101     |
| 3042 | CSNK1A1  | ENSG00000113712 | 5:149496860-149505446:-     | 0.029988   | 0.11244437    | 0.089949168     |
| 3043 | TCOF1    | ENSG00000070814 | 5:150375554-150375720:+     | 0.00025552 | 0.0758956     | 0.126968718     |
| 3044 | TCOF1    | ENSG00000070814 | 5:150375909-150376081:+     | 0.0271725  | 0.072271693   | 0.095730187     |
| 3045 | TCOF1    | ENSG00000070814 | 5:150390023-150391543:+     | 0.02237471 | 0.066235939   | 0.056356534     |
| 3046 | ANXA6    | ENSG00000197043 | 5:151105303-151108454:-     | 3.39E-14   | 0.132993911   | 0.068387969     |
| 3047 | ANXA6    | ENSG00000197043 | 5:151109846-151117126:-     | 6.39E-06   | 0.014072039   | 0.006928239     |
| 3048 | ANXA6    | ENSG00000197043 | 5:151124367-151126401:-     | 0.00021783 | 0.113345823   | 0.087333834     |
| 3049 | ANXA6    | ENSG00000197043 | 5:151126480-151128180:-     | 2.52E-05   | 0.120578329   | 0.092866447     |
| 3050 | STK10    | ENSG00000072786 | 5:172061268-172064719:-     | 0.00015068 | 0.299651976   | 0.22640724      |
| 3051 | DUSP1    | ENSG00000120129 | 5:172769794-172770160:-     | 0.02342261 | 0.170511624   | 0.154555413     |
| 3052 | DUSP1    | ENSG00000120129 | 5:172770306-172770585:-     | 0.03013741 | 0.219728376   | 0.203047943     |
| 3053 | SFXN1    | ENSG00000164466 | 5:175521968-175522374:+     | 0.04839275 | 0.100435402   | 0.074157461     |
| 3054 | RNF44    | ENSG00000146083 | 5:176529090-176529287:-     | 0.00043283 | 0.181298502   | 0.1391405       |
| 3055 | UIMC1    | ENSG00000087206 | 5:176958154-176968554:-     | 9.82E-05   | 0.046269842   | 0.062621536     |
| 3056 | ZNF346   | ENSG00000113761 | 5:177050936-177062057:+     | 0.0302853  | 0.098163465   | 0.1343663       |
| 3057 | RAB24    | ENSG00000169228 | 5:177301987-177302127:-     | 0.0097173  | 0.203089122   | 0.166615448     |
| 3058 | RAB24    | ENSG00000169228 | 5:177302178-177302396:-     | 0.0001669  | 0.675504768   | 0.604137247     |
| 3059 | GRK6     | ENSG00000198055 | 5:177430967-177431994:+     | 0.0219119  | 0.07746655    | 0.111507204     |
| 3060 | DDX41    | ENSG00000183258 | 5:177513082-177513352:-     | 0.00111594 | 0.102288907   | 0.082755061     |
| 3061 | DDX41    | ENSG00000183258 | 5:177515258-177515684:-     | 0.0223938  | 0.34270472    | 0.407404948     |
| 3062 | DDX41    | ENSG00000183258 | 5:177515821-177515928:-     | 0.0215119  | 0.175183944   | 0.214733478     |
| 3063 | DDX41    | ENSG00000183258 | 5:177516835-177516918:-     | 0.0003615  | 0.218844001   | 0.167503171     |
| 3064 | FAM193B  | ENSG00000146067 | 5:177532200-177532442:-     | 0.00071989 | 0.147034234   | 0.159970284     |
| 3065 | B4GALT7  | ENSG00000027847 | 5:177607527-177608538:+     | 0.00045957 | 0.159450088   | 0.116907626     |
| 3066 | B4GALT7  | ENSG00000027847 | 5:177608622-177608909:+     | 0.00977386 | 0.142582028   | 0.115492187     |
| 3067 | B4GALT7  | ENSG00000027847 | 5:177609014-177609539:+     | 0.03574123 | 0.121188763   | 0.094465411     |
| 3068 | HNRNPAB  | ENSG00000197451 | 5:178210272-178210552:+     | 0.00010756 | 0.090466648   | 0.117241919     |
| 3069 | PHYKPL   | ENSG00000175309 | 5:178211970-178212972:-     | 0.00023559 | 0.07589824    | 0.051000699     |
| 3070 | PHYKPL   | ENSG00000175309 | 5:178213103-178214795:-     | 0.0025542  | 0.068297883   | 0.049641434     |
| 3071 | RUFY1    | ENSG00000176783 | 5:179605924-179607581:+     | 1.69E-05   | 0.224969488   | 0.176220186     |
| 3072 | HNRNP1   | ENSG00000169045 | 5:179615595-179616125:-     | 0.0013187  | 0.09139501    | 0.070207008     |
| 3073 | HNRNP1   | ENSG00000169045 | 5:179616218-179617020:-     | 0.00469517 | 0.159905678   | 0.154766616     |
| 3074 | HNRNP1   | ENSG00000169045 | 5:179617110-179617513:-     | 0.00013136 | 0.228668374   | 0.147332168     |
| 3075 | MGAT4B   | ENSG00000161013 | 5:179798434-179798512:-     | 0.02048207 | 0.165759857   | 0.140906494     |
| 3076 | MGAT4B   | ENSG00000161013 | 5:179800597-179800906:-     | 0.00141659 | 0.101662509   | 0.074643148     |
| 3077 | MGAT4B   | ENSG00000161013 | 5:179800953-179801333:-     | 0.00193748 | 0.1763883     | 0.133167988     |
| 3078 | MRNIP    | ENSG00000161010 | 5:179837885-179840871:-     | 0.00099893 | 0.614881744   | 0.558249675     |



| S/N  | Gene     | Ensembl ID      | Position of retained intron | p-value    | AD_IR_average | Cont_IR_average |
|------|----------|-----------------|-----------------------------|------------|---------------|-----------------|
| 3079 | TBC1D9B  | ENSG00000197226 | 5:179870495-179871461:-     | 0.01253459 | 0.116207283   | 0.094793662     |
| 3080 | RNF130   | ENSG00000113269 | 5:179955669-179963470:-     | 5.05E-08   | 0.112517519   | 0.071668286     |
| 3081 | TRIM41   | ENSG00000146063 | 5:181230839-181232658:+     | 0.04297727 | 0.117637248   | 0.10525244      |
| 3082 | TRIM41   | ENSG00000146063 | 5:181232889-181233412:+     | 0.0014316  | 0.217907641   | 0.178202412     |
| 3083 | TRIM41   | ENSG00000146063 | 5:181233435-181233635:+     | 0.00179134 | 0.304813866   | 0.258812682     |
| 3084 | NQO2     | ENSG00000124588 | 6:3016985-3019478:+         | 0.03475562 | 0.186550132   | 0.210968782     |
| 3085 | PSMG4    | ENSG00000180822 | 6:3259196-3263683:+         | 6.13E-06   | 0.239669902   | 0.162760639     |
| 3086 | PSMG4    | ENSG00000180822 | 6:3263759-3267590:+         | 1.22E-05   | 0.298720526   | 0.214797839     |
| 3087 | PRPF4B   | ENSG00000112739 | 6:4060686-4061014:+         | 0.0037717  | 0.797423049   | 0.744566961     |
| 3088 | PRPF4B   | ENSG00000112739 | 6:4061147-4061654:+         | 0.00375889 | 0.712375134   | 0.664989273     |
| 3089 | PRPF4B   | ENSG00000112739 | 6:4062299-4062556:+         | 1.05E-08   | 0.418676085   | 0.273246582     |
| 3090 | PRPF4B   | ENSG00000112739 | 6:4063119-4064800:+         | 9.55E-13   | 0.808177195   | 0.663802091     |
| 3091 | RIOK1    | ENSG00000124784 | 6:7411451-7412888:+         | 2.81E-06   | 0.109459623   | 0.063351581     |
| 3092 | RIOK1    | ENSG00000124784 | 6:7412942-7414237:+         | 0.00328644 | 0.253792493   | 0.205439113     |
| 3093 | RANBP9   | ENSG0000010017  | 6:13632521-13634430:-       | 0.02286143 | 0.221586713   | 0.201595091     |
| 3094 | BTN2A2   | ENSG00000124508 | 6:26390707-26390802:+       | 0.03340167 | 0.2232864     | 0.183038775     |
| 3095 | BTN2A1   | ENSG00000112763 | 6:26459828-26463243:+       | 0.00792574 | 0.076713352   | 0.111166151     |
| 3096 | BTN2A1   | ENSG00000112763 | 6:26465973-26466061:+       | 0.04763268 | 0.15756356    | 0.127872895     |
| 3097 | PGBD1    | ENSG00000137338 | 6:28296945-28297894:+       | 0.00103384 | 0.382355378   | 0.326802597     |
| 3098 | TRIM27   | ENSG00000204713 | 6:28904665-28907235:-       | 3.49E-05   | 0.222007029   | 0.163513517     |
| 3099 | TRIM27   | ENSG00000204713 | 6:28907262-28908807:-       | 2.87E-05   | 0.196940757   | 0.126734639     |
| 3100 | GABBR1   | ENSG00000204681 | 6:29624024-29627485:-       | 0.01601894 | 0.108799687   | 0.094627517     |
| 3101 | RPP21    | ENSG00000241370 | 6:30345228-30345297:+       | 0.00308891 | 0.259196415   | 0.221562883     |
| 3102 | PRR3     | ENSG00000204576 | 6:30562124-30562388:+       | 0.00115066 | 0.330573168   | 0.254821581     |
| 3103 | ATAT1    | ENSG00000137343 | 6:30640422-30640534:+       | 0.00187099 | 0.085037284   | 0.075001754     |
| 3104 | ATAT1    | ENSG00000137343 | 6:30640603-30642175:+       | 0.006224   | 0.18051912    | 0.175951638     |
| 3105 | C6orf136 | ENSG00000204564 | 6:30649959-30650993:+       | 0.03454486 | 0.256034171   | 0.227810032     |
| 3106 | FLOT1    | ENSG00000137312 | 6:30740798-30741189:-       | 0.00366064 | 0.156186211   | 0.147848014     |
| 3107 | FLOT1    | ENSG00000137312 | 6:30741333-30741613:-       | 0.0108209  | 0.216418107   | 0.204711369     |
| 3108 | GTF2H4   | ENSG00000213780 | 6:30911767-30912013:+       | 0.00046656 | 0.214321989   | 0.285689717     |
| 3109 | VARS2    | ENSG00000137411 | 6:30917806-30918826:+       | 4.66E-06   | 0.412792354   | 0.357852403     |
| 3110 | VARS2    | ENSG00000137411 | 6:30918915-30919757:+       | 7.28E-07   | 0.418945671   | 0.358570117     |
| 3111 | VARS2    | ENSG00000137411 | 6:30923231-30923352:+       | 4.64E-10   | 0.1109709     | 0.066439194     |
| 3112 | VARS2    | ENSG00000137411 | 6:30923505-30924353:+       | 7.02E-10   | 0.149822513   | 0.093816186     |
| 3113 | CCHCR1   | ENSG00000204536 | 6:31142716-31142962:-       | 0.00201317 | 0.460916829   | 0.387658766     |
| 3114 | CCHCR1   | ENSG00000204536 | 6:31143134-31143261:-       | 0.04042301 | 0.296705659   | 0.253499506     |
| 3115 | CCHCR1   | ENSG00000204536 | 6:31143413-31144686:-       | 0.00568524 | 0.118998028   | 0.094288579     |
| 3116 | CCHCR1   | ENSG00000204536 | 6:31144788-31144884:-       | 0.01716059 | 0.141397068   | 0.17335147      |
| 3117 | CCHCR1   | ENSG00000204536 | 6:31145302-31145447:-       | 0.00321726 | 0.161350776   | 0.122094027     |
| 3118 | CCHCR1   | ENSG00000204536 | 6:31145493-31145695:-       | 0.01788042 | 0.159951452   | 0.128435152     |
| 3119 | HLA-B    | ENSG00000234745 | 6:31355592-31356166:-       | 0.00861703 | 0.207166605   | 0.173017627     |
| 3120 | DDX39B   | ENSG00000198563 | 6:31531405-31532779:-       | 0.01379408 | 0.108076967   | 0.095137043     |
| 3121 | DDX39B   | ENSG00000198563 | 6:31532911-31535366:-       | 0.00064132 | 0.572819207   | 0.520040338     |
| 3122 | PRRC2A   | ENSG00000204469 | 6:31625871-31626019:+       | 0.01641891 | 0.149933848   | 0.128944032     |
| 3123 | PRRC2A   | ENSG00000204469 | 6:31628239-31629143:+       | 0.00452967 | 0.137245251   | 0.172137739     |
| 3124 | GPANK1   | ENSG00000204438 | 6:31664577-31664840:-       | 0.00877719 | 0.073937363   | 0.097872887     |
| 3125 | CSNK2B   | ENSG00000204435 | 6:31668654-31669096:+       | 9.89E-12   | 0.151180941   | 0.094906599     |
| 3126 | CSNK2B   | ENSG00000204435 | 6:31669172-31669318:+       | 0.00114235 | 0.256588991   | 0.215882519     |
| 3127 | ABHD16A  | ENSG00000204427 | 6:31688786-31689014:-       | 7.58E-05   | 0.171539739   | 0.127329425     |
| 3128 | ABHD16A  | ENSG00000204427 | 6:31689119-31689580:-       | 2.47E-08   | 0.144850034   | 0.08768169      |
| 3129 | ABHD16A  | ENSG00000204427 | 6:31689704-31690077:-       | 0.00017386 | 0.095604084   | 0.072883092     |
| 3130 | VARS     | ENSG00000204394 | 6:31782845-31783095:-       | 0.02619161 | 0.093528447   | 0.075021175     |
| 3131 | EHMT2    | ENSG00000204371 | 6:31888747-31888968:-       | 0.01611821 | 0.087119256   | 0.084884992     |
| 3132 | EHMT2    | ENSG00000204371 | 6:31889070-31889227:-       | 0.00364409 | 0.103215637   | 0.09341516      |
| 3133 | NELFE    | ENSG00000204356 | 6:31953831-31954079:-       | 0.00035841 | 0.463722732   | 0.389760065     |
| 3134 | SKIV2L   | ENSG00000204351 | 6:31961094-31961195:+       | 0.00053713 | 0.066839209   | 0.096638186     |
| 3135 | SKIV2L   | ENSG00000204351 | 6:31968082-31968327:+       | 0.00042303 | 0.560236463   | 0.484489844     |

| S/N  | Gene      | Ensembl ID      | Position of retained intron | p-value    | AD_IR_average | Cont_IR_average |
|------|-----------|-----------------|-----------------------------|------------|---------------|-----------------|
| 3136 | DXO       | ENSG00000204348 | 6:31970024-31970108:-       | 6.76E-05   | 0.355997195   | 0.289050974     |
| 3137 | DXO       | ENSG00000204348 | 6:31970203-31970342:-       | 0.01716014 | 0.510477073   | 0.457658506     |
| 3138 | DXO       | ENSG00000204348 | 6:31970478-31970605:-       | 0.02870707 | 0.492691378   | 0.447404818     |
| 3139 | STK19     | ENSG00000204344 | 6:31979553-31980450:+       | 0.00028497 | 0.31201772    | 0.260950455     |
| 3140 | TNXB      | ENSG00000168477 | 6:32050321-32052669:-       | 8.04E-05   | 0.143433232   | 0.210135768     |
| 3141 | ATF6B     | ENSG00000213676 | 6:32115968-32116479:-       | 6.99E-05   | 0.634105537   | 0.53530713      |
| 3142 | ATF6B     | ENSG00000213676 | 6:32117404-32117586:-       | 1.14E-06   | 0.108878794   | 0.062580911     |
| 3143 | ATF6B     | ENSG00000213676 | 6:32117694-32117858:-       | 4.47E-05   | 0.155944029   | 0.104833087     |
| 3144 | ATF6B     | ENSG00000213676 | 6:32118866-32118955:-       | 6.32E-05   | 0.260053779   | 0.189088584     |
| 3145 | PPT2-EGFL | ENSG00000258388 | 6:32157924-32162567:+       | 1.25E-05   | 0.145437857   | 0.105228834     |
| 3146 | PPT2      | ENSG00000221988 | 6:32162622-32162806:+       | 0.00483569 | 0.446873805   | 0.40684139      |
| 3147 | EGFL8     | ENSG00000241404 | 6:32166620-32166700:+       | 9.02E-05   | 0.238196622   | 0.174133234     |
| 3148 | EGFL8     | ENSG00000241404 | 6:32167005-32167086:+       | 0.00208319 | 0.303234293   | 0.251211299     |
| 3149 | AGER      | ENSG00000204305 | 6:32181632-32182246:-       | 0.00140354 | 0.122387874   | 0.099359332     |
| 3150 | AGER      | ENSG00000204305 | 6:32182388-32182567:-       | 0.00384544 | 0.13625651    | 0.105632024     |
| 3151 | AGER      | ENSG00000204305 | 6:32182698-32182840:-       | 0.01097752 | 0.240105145   | 0.19620546      |
| 3152 | PBX2      | ENSG00000204304 | 6:32186474-32186603:-       | 0.01054819 | 0.082615957   | 0.096204986     |
| 3153 | TAP2      | ENSG00000204267 | 6:32830440-32830617:-       | 0.03340963 | 0.075193448   | 0.096870327     |
| 3154 | COL11A2   | ENSG00000204248 | 6:33163818-33164266:-       | 3.91E-10   | 0.211220276   | 0.09447041      |
| 3155 | COL11A2   | ENSG00000204248 | 6:33165984-33166170:-       | 0.00034992 | 0.090692164   | 0.063515865     |
| 3156 | COL11A2   | ENSG00000204248 | 6:33167123-33167263:-       | 5.10E-10   | 0.076841776   | 0.038400781     |
| 3157 | RXRB      | ENSG00000204231 | 6:33195454-33195569:-       | 0.01217894 | 0.062748634   | 0.084837209     |
| 3158 | RXRB      | ENSG00000204231 | 6:33195702-33195906:-       | 0.00546557 | 0.174851838   | 0.224691466     |
| 3159 | RXRB      | ENSG00000204231 | 6:33196036-33196433:-       | 0.00171457 | 0.191827277   | 0.247786026     |
| 3160 | VPS52     | ENSG00000223501 | 6:33264497-33264781:-       | 0.04200192 | 0.443480854   | 0.422263156     |
| 3161 | WDR46     | ENSG00000227057 | 6:33280522-33280673:-       | 1.91E-07   | 0.316181874   | 0.423965844     |
| 3162 | WDR46     | ENSG00000227057 | 6:33280987-33286794:-       | 0.01409967 | 0.11550871    | 0.138844573     |
| 3163 | WDR46     | ENSG00000227057 | 6:33286894-33287090:-       | 0.00780257 | 0.086414236   | 0.101573934     |
| 3164 | WDR46     | ENSG00000227057 | 6:33287505-33287613:-       | 0.01076898 | 0.087236341   | 0.109812077     |
| 3165 | WDR46     | ENSG00000227057 | 6:33287718-33287964:-       | 0.0139278  | 0.0861516     | 0.112435545     |
| 3166 | WDR46     | ENSG00000227057 | 6:33288235-33288357:-       | 0.0331064  | 0.116953901   | 0.150313134     |
| 3167 | WDR46     | ENSG00000227057 | 6:33288694-33288803:-       | 2.72E-05   | 0.142353645   | 0.219523386     |
| 3168 | RGL2      | ENSG00000237441 | 6:33293524-33293603:-       | 1.09E-07   | 0.492023476   | 0.439421104     |
| 3169 | RGL2      | ENSG00000237441 | 6:33293699-33293794:-       | 7.57E-10   | 0.477603927   | 0.384509571     |
| 3170 | RGL2      | ENSG00000237441 | 6:33293916-33294033:-       | 6.71E-05   | 0.337669439   | 0.269011896     |
| 3171 | RGL2      | ENSG00000237441 | 6:33294066-33294687:-       | 0.01238461 | 0.103777006   | 0.081640075     |
| 3172 | RGL2      | ENSG00000237441 | 6:33295759-33296027:-       | 1.67E-07   | 0.459904439   | 0.564741325     |
| 3173 | PHF1      | ENSG00000112511 | 6:33413557-33413735:+       | 5.65E-06   | 0.315512768   | 0.248036519     |
| 3174 | PHF1      | ENSG00000112511 | 6:33413831-33414040:+       | 6.44E-05   | 0.164165221   | 0.124197873     |
| 3175 | PHF1      | ENSG00000112511 | 6:33414829-33414954:+       | 0.01970833 | 0.065897906   | 0.053567491     |
| 3176 | SYNGAP1   | ENSG00000197283 | 6:33444617-33446574:+       | 0.0190649  | 0.084014621   | 0.068731892     |
| 3177 | BAK1      | ENSG0000030110  | 6:33573907-33574033:-       | 0.02546618 | 0.178287713   | 0.215376408     |
| 3178 | ZNF76     | ENSG00000065029 | 6:35287845-35290265:+       | 0.03687072 | 0.204926496   | 0.23785326      |
| 3179 | ZNF76     | ENSG00000065029 | 6:35293915-35294455:+       | 5.71E-11   | 0.199272662   | 0.1248075       |
| 3180 | PPARD     | ENSG00000112033 | 6:35411217-35420126:+       | 0.00501796 | 0.160569055   | 0.130822049     |
| 3181 | PPARD     | ENSG00000112033 | 6:35421958-35423945:+       | 0.01374169 | 0.121740828   | 0.107819696     |
| 3182 | FANCE     | ENSG00000112039 | 6:35462914-35466243:+       | 0.0049419  | 0.092369466   | 0.064066806     |
| 3183 | ADCY10P1  | ENSG00000161912 | 6:41140069-41140597:+       | 0.00037389 | 0.15242451    | 0.115482951     |
| 3184 | TFEB      | ENSG00000112561 | 6:41687169-41687752:-       | 0.00012232 | 0.224836223   | 0.203337318     |
| 3185 | UBR2      | ENSG0000024048  | 6:42688386-42689568:+       | 0.00432136 | 0.098975151   | 0.07846622      |
| 3186 | PEX6      | ENSG00000124587 | 6:42964471-42964789:-       | 2.61E-07   | 0.10642274    | 0.072945658     |
| 3187 | PEX6      | ENSG00000124587 | 6:42964929-42965074:-       | 0.00090733 | 0.199388113   | 0.160436836     |
| 3188 | PEX6      | ENSG00000124587 | 6:42965152-42965251:-       | 9.40E-05   | 0.153195404   | 0.113063206     |
| 3189 | PEX6      | ENSG00000124587 | 6:42965368-42965680:-       | 3.52E-07   | 0.112161689   | 0.075740382     |
| 3190 | PEX6      | ENSG00000124587 | 6:42966105-42966241:-       | 0.01490885 | 0.509501293   | 0.464749234     |
| 3191 | PEX6      | ENSG00000124587 | 6:42966657-42966781:-       | 0.01339855 | 0.171772111   | 0.141757855     |
| 3192 | PEX6      | ENSG00000124587 | 6:42966858-42967367:-       | 0.00013335 | 0.197229607   | 0.147682103     |

| S/N  | Gene      | Ensembl ID      | Position of retained intron | p-value    | AD_IR_average | Cont_IR_average |
|------|-----------|-----------------|-----------------------------|------------|---------------|-----------------|
| 3193 | CUL7      | ENSG00000044090 | 6:43038692-43038841:-       | 0.0003757  | 0.337090183   | 0.276196455     |
| 3194 | MRPL2     | ENSG00000112651 | 6:43054486-43055544:-       | 0.03404318 | 0.107742726   | 0.09142993      |
| 3195 | MRPL2     | ENSG00000112651 | 6:43055618-43055896:-       | 0.02131888 | 0.132721393   | 0.108221852     |
| 3196 | MRPL2     | ENSG00000112651 | 6:43056007-43056080:-       | 0.03397773 | 0.117708846   | 0.098426965     |
| 3197 | KLC4      | ENSG00000137171 | 6:43066525-43066995:+       | 0.00432787 | 0.171311533   | 0.141201926     |
| 3198 | KLC4      | ENSG00000137171 | 6:43073338-43073901:+       | 0.00058428 | 0.120075576   | 0.08996783      |
| 3199 | CUL9      | ENSG00000112659 | 6:43221321-43221684:+       | 0.00099669 | 0.271488666   | 0.219395158     |
| 3200 | CUL9      | ENSG00000112659 | 6:43221778-43222315:+       | 0.0110963  | 0.144674033   | 0.116635997     |
| 3201 | TTBK1     | ENSG00000146216 | 6:43255114-43255551:+       | 0.01708137 | 0.119989966   | 0.149618601     |
| 3202 | TTBK1     | ENSG00000146216 | 6:43259269-43259530:+       | 0.02060567 | 0.12123331    | 0.1457308       |
| 3203 | ABCC10    | ENSG00000124574 | 6:43445314-43445598:+       | 0.00651851 | 0.30802613    | 0.276708674     |
| 3204 | TJAP1     | ENSG00000137221 | 6:43501687-43502282:+       | 0.01050741 | 0.141705841   | 0.185766408     |
| 3205 | YIPF3     | ENSG00000137207 | 6:43513200-43513358:-       | 0.01412369 | 0.130926312   | 0.116168304     |
| 3206 | POLR1C    | ENSG00000171453 | 6:43520427-43520624:+       | 0.00844104 | 0.126244614   | 0.098665252     |
| 3207 | XPO5      | ENSG00000124571 | 6:43527731-43528158:-       | 0.02463131 | 0.309283222   | 0.269786351     |
| 3208 | TMEM63B   | ENSG00000137216 | 6:44148945-44149858:+       | 1.46E-06   | 0.483542      | 0.36183561      |
| 3209 | TMEM63B   | ENSG00000137216 | 6:44149965-44150223:+       | 3.11E-05   | 0.220439248   | 0.124820904     |
| 3210 | TMEM63B   | ENSG00000137216 | 6:44150629-44151845:+       | 0.00091794 | 0.239921317   | 0.187683048     |
| 3211 | TMEM63B   | ENSG00000137216 | 6:44152008-44152592:+       | 0.00156335 | 0.197566063   | 0.156566716     |
| 3212 | TMEM63B   | ENSG00000137216 | 6:44152698-44153675:+       | 0.0456976  | 0.357010866   | 0.320287883     |
| 3213 | TMEM63B   | ENSG00000137216 | 6:44153843-44154072:+       | 7.21E-05   | 0.163917365   | 0.122434373     |
| 3214 | TMEM63B   | ENSG00000137216 | 6:44154188-44154364:+       | 0.00013252 | 0.163274287   | 0.118940305     |
| 3215 | GSTA4     | ENSG00000170899 | 6:52985583-52987356:-       | 0.0011005  | 0.254091184   | 0.220704786     |
| 3216 | FBXO9     | ENSG00000112146 | 6:53092824-53093465:+       | 0.03665746 | 0.420833341   | 0.384555974     |
| 3217 | DST       | ENSG00000151914 | 6:56463764-56464684:-       | 0.00387753 | 0.074117035   | 0.071732543     |
| 3218 | DST       | ENSG00000151914 | 6:56464756-56466077:-       | 0.00053097 | 0.049165335   | 0.040889584     |
| 3219 | HMGN3     | ENSG00000118418 | 6:79202389-79203579:-       | 0.00187563 | 0.12790548    | 0.096625071     |
| 3220 | DOPEY1    | ENSG00000083097 | 6:83151659-83151882:+       | 0.0090615  | 0.145535138   | 0.126353851     |
| 3221 | RIPPLY2   | ENSG00000203877 | 6:83853773-83854096:+       | 0.0006649  | 0.105444404   | 0.075421463     |
| 3222 | RIPPLY2   | ENSG00000203877 | 6:83854161-83857241:+       | 0.00018123 | 0.188980398   | 0.142951192     |
| 3223 | SNX14     | ENSG00000135317 | 6:85508059-85513799:-       | 0.00036465 | 0.092492761   | 0.07087964      |
| 3224 | RP3-38211 | ENSG00000213204 | 6:87509175-87511398:+       | 0.00204081 | 0.256875756   | 0.200453636     |
| 3225 | RARS2     | ENSG00000146282 | 6:87514499-87514956:-       | 0.00047134 | 0.130596894   | 0.089687587     |
| 3226 | RARS2     | ENSG00000146282 | 6:87516880-87518168:-       | 0.00440087 | 0.136879045   | 0.105185492     |
| 3227 | ANKRD6    | ENSG00000135299 | 6:89624057-89624538:+       | 0.01975791 | 0.148305638   | 0.199430317     |
| 3228 | MICAL1    | ENSG00000135596 | 6:109444995-109445196:-     | 0.00058475 | 0.098774163   | 0.078453655     |
| 3229 | MICAL1    | ENSG00000135596 | 6:109445290-109445415:-     | 0.0114476  | 0.106560767   | 0.088821648     |
| 3230 | MICAL1    | ENSG00000135596 | 6:109445862-109446135:-     | 0.04857728 | 0.119989205   | 0.109715329     |
| 3231 | MICAL1    | ENSG00000135596 | 6:109446772-109447072:-     | 0.01708242 | 0.130054673   | 0.111314165     |
| 3232 | MICAL1    | ENSG00000135596 | 6:109447229-109447356:-     | 0.00229593 | 0.267288256   | 0.237830361     |
| 3233 | MICAL1    | ENSG00000135596 | 6:109447722-109447874:-     | 0.00935176 | 0.490701159   | 0.463984286     |
| 3234 | MICAL1    | ENSG00000135596 | 6:109447963-109448202:-     | 0.00572133 | 0.425427463   | 0.382327961     |
| 3235 | MICAL1    | ENSG00000135596 | 6:109448393-109448731:-     | 0.00187656 | 0.210405054   | 0.173394543     |
| 3236 | MICAL1    | ENSG00000135596 | 6:109449783-109449969:-     | 0.03228989 | 0.534484439   | 0.481549688     |
| 3237 | FAM184A   | ENSG00000111879 | 6:118964771-118966834:-     | 0.00452606 | 0.091418779   | 0.065563549     |
| 3238 | FAM184A   | ENSG00000111879 | 6:118966952-118974427:-     | 0.00019831 | 0.054510499   | 0.029945571     |
| 3239 | FAM184A   | ENSG00000111879 | 6:118966952-118975023:-     | 2.71E-05   | 0.051684127   | 0.029369684     |
| 3240 | SGK1      | ENSG00000118515 | 6:134170915-134171022:-     | 0.02736717 | 0.125634571   | 0.096336985     |
| 3241 | MAP7      | ENSG00000135525 | 6:136344238-136345855:-     | 3.19E-07   | 0.399783244   | 0.263424539     |
| 3242 | CCDC28A   | ENSG00000024862 | 6:138779985-138785226:+     | 0.00854002 | 0.101654728   | 0.11790233      |
| 3243 | CCDC28A   | ENSG00000024862 | 6:138788388-138792748:+     | 2.34E-06   | 0.105344322   | 0.072522104     |
| 3244 | PEX3      | ENSG00000034693 | 6:143472328-143474785:+     | 0.04345065 | 0.107676903   | 0.096363461     |
| 3245 | PEX3      | ENSG00000034693 | 6:143474856-143479075:+     | 0.00290889 | 0.169680029   | 0.125414032     |
| 3246 | PEX3      | ENSG00000034693 | 6:143479198-143485151:+     | 2.43E-05   | 0.178700459   | 0.106917005     |
| 3247 | PEX3      | ENSG00000034693 | 6:143485248-143489142:+     | 3.56E-06   | 0.278388995   | 0.169681439     |
| 3248 | KATNA1    | ENSG00000186625 | 6:149595234-149597062:-     | 0.00734917 | 0.233164832   | 0.196545716     |
| 3249 | KATNA1    | ENSG00000186625 | 6:149597189-149597506:-     | 3.35E-05   | 0.153209057   | 0.10940679      |

| S/N  | Gene      | Ensembl ID      | Position of retained intron | p-value    | AD_IR_average | Cont_IR_average |
|------|-----------|-----------------|-----------------------------|------------|---------------|-----------------|
| 3250 | DYNLT1    | ENSG00000146425 | 6:158636897-158637127:-     | 0.03617483 | 0.09495451    | 0.106187594     |
| 3251 | MAP3K4    | ENSG00000085511 | 6:161115302-161116849:+     | 0.01274501 | 0.107166554   | 0.091107643     |
| 3252 | SFT2D1    | ENSG00000198818 | 6:166322886-166324536:-     | 0.0123498  | 0.118847363   | 0.093301226     |
| 3253 | SFT2D1    | ENSG00000198818 | 6:166324595-166326131:-     | 0.00856871 | 0.093733622   | 0.068440269     |
| 3254 | FAM120B   | ENSG00000112584 | 6:170388493-170391012:+     | 0.00303602 | 0.098921744   | 0.076633186     |
| 3255 | FAM120B   | ENSG00000112584 | 6:170391121-170395486:+     | 8.33E-06   | 0.27657533    | 0.205211822     |
| 3256 | DNAAF5    | ENSG00000164818 | 7:770618-774047:+           | 0.00050149 | 0.205474485   | 0.266522725     |
| 3257 | SUN1      | ENSG00000164828 | 7:842130-843205:+           | 0.03041512 | 0.076653328   | 0.117672966     |
| 3258 | COX19     | ENSG00000240230 | 7:969456-973180:-           | 3.43E-05   | 0.287336634   | 0.229137752     |
| 3259 | MICALL2   | ENSG00000164877 | 7:1435147-1436741:-         | 0.00073149 | 0.49535689    | 0.407882961     |
| 3260 | MICALL2   | ENSG00000164877 | 7:1436856-1437534:-         | 0.00499427 | 0.430369795   | 0.354201519     |
| 3261 | MICALL2   | ENSG00000164877 | 7:1437608-1437889:-         | 0.00323514 | 0.144282689   | 0.094431928     |
| 3262 | MICALL2   | ENSG00000164877 | 7:1437980-1438096:-         | 0.00032011 | 0.188831102   | 0.122682794     |
| 3263 | MICALL2   | ENSG00000164877 | 7:1440085-1440590:-         | 0.00059908 | 0.361585623   | 0.273256268     |
| 3264 | INTS1     | ENSG00000164880 | 7:1483853-1484002:-         | 0.00205852 | 0.516579      | 0.432922065     |
| 3265 | BRAT1     | ENSG00000106009 | 7:2539888-2540978:-         | 0.01071065 | 0.690031585   | 0.647060338     |
| 3266 | IQCE      | ENSG00000106012 | 7:2607227-2610043:+         | 0.00768327 | 0.098114294   | 0.077632957     |
| 3267 | TTYH3     | ENSG00000136295 | 7:2647253-2647417:+         | 6.09E-05   | 0.233790234   | 0.162223677     |
| 3268 | TTYH3     | ENSG00000136295 | 7:2649988-2652186:+         | 0.00806958 | 0.14681345    | 0.115376875     |
| 3269 | TTYH3     | ENSG00000136295 | 7:2658459-2658939:+         | 0.00051597 | 0.106647991   | 0.077682781     |
| 3270 | AP5Z1     | ENSG00000242802 | 7:4789929-4790458:+         | 0.0332605  | 0.525327634   | 0.558974584     |
| 3271 | RADIL     | ENSG00000157927 | 7:4822554-4832140:-         | 0.04236298 | 0.127283602   | 0.105515345     |
| 3272 | FSCN1     | ENSG00000075618 | 7:5604030-5605271:+         | 0.00851672 | 0.11692072    | 0.100697749     |
| 3273 | USP42     | ENSG00000106346 | 7:6157055-6159449:+         | 0.00409762 | 0.191190237   | 0.159535675     |
| 3274 | USP42     | ENSG00000106346 | 7:6159493-6160554:+         | 0.00444808 | 0.15933538    | 0.131302278     |
| 3275 | C7orf26   | ENSG00000146576 | 7:6602140-6607959:+         | 0.00584179 | 0.369348768   | 0.417777558     |
| 3276 | ZNF316    | ENSG00000205903 | 7:6638009-6639041:+         | 0.00013242 | 0.113714812   | 0.161685403     |
| 3277 | ZNF316    | ENSG00000205903 | 7:6641962-6642381:+         | 2.76E-05   | 0.200715839   | 0.278214423     |
| 3278 | MIOS      | ENSG00000164654 | 7:7588563-7589404:+         | 0.01964823 | 0.172915717   | 0.135437624     |
| 3279 | MIOS      | ENSG00000164654 | 7:7589563-7594979:+         | 0.01462139 | 0.120864127   | 0.095839064     |
| 3280 | ICA1      | ENSG00000003147 | 7:8114044-8127872:-         | 0.02118698 | 0.100378915   | 0.079179399     |
| 3281 | MALSU1    | ENSG00000156928 | 7:23301017-23307867:+       | 0.00250195 | 0.117462967   | 0.084481642     |
| 3282 | TRA2A     | ENSG00000164548 | 7:23506266-23507419:-       | 0.02815951 | 0.137405346   | 0.114020955     |
| 3283 | HNRNPA2B1 | ENSG00000122566 | 7:26192338-26192494:-       | 0.03000174 | 0.173746288   | 0.19748991      |
| 3284 | GARS      | ENSG00000106105 | 7:30628669-30631447:+       | 3.23E-09   | 0.123478005   | 0.070056349     |
| 3285 | GARS      | ENSG00000106105 | 7:30631541-30632246:+       | 0.02062729 | 0.19940124    | 0.171911645     |
| 3286 | NT5C3A    | ENSG00000122643 | 7:33014831-33015669:-       | 0.00286059 | 0.144105471   | 0.108248857     |
| 3287 | STARD3NL  | ENSG0000010270  | 7:38215105-38217024:+       | 0.00304192 | 0.068809525   | 0.055589987     |
| 3288 | YAE1D1    | ENSG00000241127 | 7:39570627-39572276:+       | 0.00016096 | 0.262269899   | 0.201693244     |
| 3289 | MRPS24    | ENSG00000062582 | 7:43869376-43869456:-       | 0.00464587 | 0.343375366   | 0.294777494     |
| 3290 | URGCP-MF  | ENSG00000270617 | 7:43881697-43881906:-       | 0.04131717 | 0.11825216    | 0.110034578     |
| 3291 | UBE2D4    | ENSG00000078967 | 7:43942857-43942953:+       | 0.03574278 | 0.176328224   | 0.148840692     |
| 3292 | DBNL      | ENSG00000136279 | 7:44059658-44060047:+       | 0.02905411 | 0.115447574   | 0.090704277     |
| 3293 | DBNL      | ENSG00000136279 | 7:44060153-44060776:+       | 0.01519164 | 0.116176456   | 0.088356177     |
| 3294 | PGAM2     | ENSG00000164708 | 7:44062930-44064831:-       | 0.00726831 | 0.229033141   | 0.1937832       |
| 3295 | POLD2     | ENSG00000106628 | 7:44114945-44115294:-       | 0.00163702 | 0.199618813   | 0.159129039     |
| 3296 | POLD2     | ENSG00000106628 | 7:44115893-44116114:-       | 3.46E-05   | 0.134953772   | 0.100498741     |
| 3297 | POLD2     | ENSG00000106628 | 7:44116272-44116429:-       | 1.97E-05   | 0.188762317   | 0.137635855     |
| 3298 | POLD2     | ENSG00000106628 | 7:44117247-44117618:-       | 0.0163099  | 0.159261388   | 0.139237513     |
| 3299 | CAMK2B    | ENSG00000058404 | 7:44219522-44220059:-       | 0.00987415 | 0.070867566   | 0.084072309     |
| 3300 | ZMIZ2     | ENSG00000122515 | 7:44759460-44760424:+       | 0.00657879 | 0.357581951   | 0.404825078     |
| 3301 | NACAD     | ENSG00000136274 | 7:45081263-45081600:-       | 0.00033733 | 0.153399611   | 0.120238247     |
| 3302 | NACAD     | ENSG00000136274 | 7:45081672-45081754:-       | 0.03539128 | 0.20225033    | 0.173473634     |
| 3303 | GBAS      | ENSG00000146729 | 7:55978395-55981472:+       | 0.02678321 | 0.1340999     | 0.096778148     |
| 3304 | CCT6A     | ENSG00000146731 | 7:56061849-56062682:+       | 0.0003458  | 0.078569882   | 0.111436621     |
| 3305 | SUMF2     | ENSG00000129103 | 7:56076889-56078101:+       | 0.00033121 | 0.122196154   | 0.089352306     |
| 3306 | SUMF2     | ENSG00000129103 | 7:56078186-56078363:+       | 0.0091879  | 0.222613374   | 0.190078092     |



| S/N  | Gene      | Ensembl ID      | Position of retained intron | p-value    | AD_IR_average | Cont_IR_average |
|------|-----------|-----------------|-----------------------------|------------|---------------|-----------------|
| 3307 | GUSB      | ENSG00000169919 | 7:65976202-65979398:-       | 0.00640797 | 0.114703949   | 0.097341661     |
| 3308 | ASL       | ENSG00000126522 | 7:66086662-66086743:+       | 0.01799229 | 0.236269527   | 0.194370113     |
| 3309 | AC068533  | ENSG00000249319 | 7:66087791-66088806:+       | 0.03795875 | 0.146795417   | 0.133408162     |
| 3310 | SBDSP1    | ENSG00000225648 | 7:72830813-72831601:+       | 0.01390191 | 0.137194804   | 0.128226461     |
| 3311 | MLXIPL    | ENSG00000009950 | 7:73593983-73594273:-       | 0.01089723 | 0.174949223   | 0.140943287     |
| 3312 | MLXIPL    | ENSG00000009950 | 7:73594403-73595636:-       | 7.89E-06   | 0.138811148   | 0.090771281     |
| 3313 | MLXIPL    | ENSG00000009950 | 7:73595760-73595841:-       | 0.00020647 | 0.129569026   | 0.085993904     |
| 3314 | WBSCR22   | ENSG00000071462 | 7:73683804-73686635:+       | 0.00261292 | 0.075763067   | 0.068036269     |
| 3315 | WBSCR22   | ENSG00000071462 | 7:73692646-73693328:+       | 1.50E-07   | 0.11124644    | 0.07514534      |
| 3316 | WBSCR22   | ENSG00000071462 | 7:73694050-73697604:+       | 8.21E-05   | 0.268596634   | 0.221305873     |
| 3317 | ELN       | ENSG00000049540 | 7:74065997-74066731:+       | 2.95E-05   | 0.060865995   | 0.044324671     |
| 3318 | GTF2IRD1  | ENSG00000006704 | 7:74601180-74602364:+       | 3.84E-09   | 0.483542671   | 0.356058558     |
| 3319 | POR       | ENSG00000127948 | 7:75985207-75985578:+       | 0.00561266 | 0.165867179   | 0.133415416     |
| 3320 | TMEM120   | ENSG00000189077 | 7:75987428-75987537:-       | 0.00912253 | 0.174875617   | 0.138639412     |
| 3321 | TMEM120   | ENSG00000189077 | 7:75989224-75992143:-       | 6.78E-05   | 0.169706617   | 0.132153416     |
| 3322 | AKAP9     | ENSG00000127914 | 7:92105763-92107292:+       | 6.16E-07   | 0.085226687   | 0.054502262     |
| 3323 | AKAP9     | ENSG00000127914 | 7:92108633-92110121:+       | 6.94E-12   | 0.343438207   | 0.217779826     |
| 3324 | PEX1      | ENSG00000127980 | 7:92487541-92489292:-       | 0.03643886 | 0.127591707   | 0.100157556     |
| 3325 | PEX1      | ENSG00000127980 | 7:92489423-92489713:-       | 0.03592727 | 0.179555937   | 0.146703001     |
| 3326 | PEX1      | ENSG00000127980 | 7:92489911-92491271:-       | 0.042597   | 0.180577987   | 0.135885665     |
| 3327 | RBM48     | ENSG00000127993 | 7:92534970-92536850:+       | 0.00791345 | 0.432267573   | 0.389909896     |
| 3328 | SGCE      | ENSG00000127990 | 7:94585515-94588688:-       | 0.02421993 | 0.085735084   | 0.060102261     |
| 3329 | PDAP1     | ENSG00000106244 | 7:99396740-99397861:-       | 3.48E-07   | 0.178029216   | 0.131271509     |
| 3330 | ATP5J2-PT | ENSG00000248919 | 7:99420149-99423774:-       | 0.04432482 | 0.082035052   | 0.094864466     |
| 3331 | CPSF4     | ENSG00000160917 | 7:99450371-99450701:+       | 0.01915673 | 0.101426985   | 0.08227995      |
| 3332 | ZSCAN21   | ENSG00000166529 | 7:100057405-100057697:+     | 0.00043733 | 0.135069885   | 0.190089134     |
| 3333 | COPS6     | ENSG00000168090 | 7:100089746-100090398:+     | 0.04818432 | 0.148206145   | 0.139717234     |
| 3334 | MCM7      | ENSG00000166508 | 7:100099403-100099588:-     | 0.00744359 | 0.182609066   | 0.232152284     |
| 3335 | TAF6      | ENSG00000106290 | 7:100110073-100110199:-     | 1.92E-06   | 0.26212275    | 0.193840865     |
| 3336 | CNPY4     | ENSG00000166997 | 7:100122577-100122783:+     | 0.0012056  | 0.22533727    | 0.172978918     |
| 3337 | C7orf43   | ENSG00000146826 | 7:100155825-100156385:-     | 0.02085578 | 0.276837256   | 0.257397961     |
| 3338 | C7orf43   | ENSG00000146826 | 7:100156992-100157093:-     | 0.01711224 | 0.093719756   | 0.076710982     |
| 3339 | GATS      | ENSG00000239521 | 7:100222720-100223569:-     | 1.26E-07   | 0.415618387   | 0.312689918     |
| 3340 | STAG3L5P  | ENSG00000242294 | 7:100345968-100349716:+     | 0.00259984 | 0.11753622    | 0.126412577     |
| 3341 | STAG3L5P  | ENSG00000272752 | 7:100349887-100351251:+     | 0.00835351 | 0.162976185   | 0.117884216     |
| 3342 | STAG3L5P  | ENSG00000272752 | 7:100351410-100352162:+     | 0.00017777 | 0.805837841   | 0.848693169     |
| 3343 | PILRB     | ENSG00000121716 | 7:100352914-100352996:+     | 0.00047854 | 0.323101671   | 0.398158208     |
| 3344 | PILRB     | ENSG00000121716 | 7:100353123-100353209:+     | 7.29E-05   | 0.227105183   | 0.171945235     |
| 3345 | PILRB     | ENSG00000121716 | 7:100353270-100353372:+     | 0.0166028  | 0.109077001   | 0.084102762     |
| 3346 | PILRB     | ENSG00000121716 | 7:100354012-100355142:+     | 0.00010819 | 0.086424809   | 0.060959927     |
| 3347 | ZCWPW1    | ENSG00000078487 | 7:100401336-100403693:-     | 0.03436321 | 0.085840437   | 0.071969048     |
| 3348 | ZCWPW1    | ENSG00000078487 | 7:100403785-100404177:-     | 0.00053446 | 0.228600948   | 0.181641961     |
| 3349 | ZCWPW1    | ENSG00000078487 | 7:100404244-100405012:-     | 0.00031054 | 0.24737922    | 0.204892704     |
| 3350 | PPP1R35   | ENSG00000160813 | 7:100435767-100435847:-     | 0.00449785 | 0.558596207   | 0.488616013     |
| 3351 | TSC22D4   | ENSG00000166925 | 7:100467600-100467694:-     | 0.00198606 | 0.094489752   | 0.074352855     |
| 3352 | TSC22D4   | ENSG00000166925 | 7:100467600-100474273:-     | 0.00482472 | 0.028591719   | 0.017148482     |
| 3353 | PCOLCE    | ENSG00000106333 | 7:100605812-100606415:+     | 0.00016887 | 0.676868098   | 0.593413442     |
| 3354 | MOSPD3    | ENSG00000106330 | 7:100612996-100613193:+     | 5.21E-05   | 0.12793575    | 0.0901774       |
| 3355 | MOSPD3    | ENSG00000106330 | 7:100613706-100614866:+     | 1.58E-06   | 0.273644727   | 0.192620575     |
| 3356 | ACTL6B    | ENSG00000077080 | 7:100643326-100646248:-     | 0.00663862 | 0.180790666   | 0.144207635     |
| 3357 | ACTL6B    | ENSG00000077080 | 7:100647533-100648555:-     | 0.00012195 | 0.348087491   | 0.271289696     |
| 3358 | SLC12A9   | ENSG00000146828 | 7:100861262-100861391:+     | 2.71E-05   | 0.422281671   | 0.358848597     |
| 3359 | SRRT      | ENSG00000087087 | 7:100881413-100881658:+     | 0.01760887 | 0.082137054   | 0.105325121     |
| 3360 | SRRT      | ENSG00000087087 | 7:100888143-100888256:+     | 0.00857781 | 0.111563141   | 0.12996739      |
| 3361 | PLOD3     | ENSG00000106397 | 7:101210161-101210330:-     | 0.00875298 | 0.194426168   | 0.146703319     |
| 3362 | PLOD3     | ENSG00000106397 | 7:101210444-101210531:-     | 0.04635544 | 0.101376886   | 0.074783824     |
| 3363 | FIS1      | ENSG00000214253 | 7:101240906-101244897:-     | 1.58E-05   | 0.009713756   | 0.008886335     |

| S/N  | Gene    | Ensembl ID      | Position of retained intron | p-value    | AD_IR_average | Cont_IR_average |
|------|---------|-----------------|-----------------------------|------------|---------------|-----------------|
| 3364 | SH2B2   | ENSG00000160999 | 7:102320502-102321298:+     | 1.48E-05   | 0.312475212   | 0.211957949     |
| 3365 | PRKRIP1 | ENSG00000128563 | 7:102376322-102395976:+     | 2.99E-05   | 0.064719937   | 0.076597599     |
| 3366 | PRKRIP1 | ENSG00000128563 | 7:102376322-102399547:+     | 0.03610913 | 0.063295539   | 0.074060018     |
| 3367 | PRKRIP1 | ENSG00000128563 | 7:102396537-102397619:+     | 0.01278169 | 0.339808585   | 0.299141883     |
| 3368 | PRKRIP1 | ENSG00000128563 | 7:102397698-102399547:+     | 0.00809185 | 0.0725673     | 0.060676565     |
| 3369 | ALKBH4  | ENSG00000160993 | 7:102457981-102459603:-     | 4.99E-09   | 0.167545761   | 0.107823266     |
| 3370 | LRWD1   | ENSG00000161036 | 7:102468377-102468553:+     | 0.00268453 | 0.591123293   | 0.527389455     |
| 3371 | PMPCB   | ENSG00000105819 | 7:103311728-103311807:+     | 0.00665229 | 0.09332751    | 0.07879827      |
| 3372 | PMPCB   | ENSG00000105819 | 7:103312131-103312206:+     | 8.33E-06   | 0.529152049   | 0.437175299     |
| 3373 | DNAJC2  | ENSG00000105821 | 7:103312643-103312946:-     | 0.01181936 | 0.432509598   | 0.390077364     |
| 3374 | DNAJC2  | ENSG00000105821 | 7:103313101-103315763:-     | 0.01420925 | 0.333264357   | 0.288912936     |
| 3375 | DNAJC2  | ENSG00000105821 | 7:103315871-103315987:-     | 0.04819379 | 0.373311768   | 0.400140818     |
| 3376 | HBP1    | ENSG00000105856 | 7:107186472-107186568:+     | 0.00350867 | 0.291123902   | 0.393295        |
| 3377 | LAMB1   | ENSG00000091136 | 7:107924389-107926182:-     | 1.07E-05   | 0.129377943   | 0.085613292     |
| 3378 | LAMB1   | ENSG00000091136 | 7:107929619-107931355:-     | 0.00366796 | 0.105195722   | 0.073991348     |
| 3379 | LRRC4   | ENSG00000128594 | 7:128030740-128030912:-     | 2.83E-05   | 0.110091582   | 0.1602852       |
| 3380 | RBM28   | ENSG00000106344 | 7:128315020-128317658:-     | 3.77E-06   | 0.144504754   | 0.104356647     |
| 3381 | RBM28   | ENSG00000106344 | 7:128317733-128317956:-     | 0.00028168 | 0.152402011   | 0.120137495     |
| 3382 | IMPDH1  | ENSG00000106348 | 7:128394599-128394888:-     | 0.00030438 | 0.207982728   | 0.152026104     |
| 3383 | IMPDH1  | ENSG00000106348 | 7:128395274-128396599:-     | 0.00023979 | 0.237471205   | 0.174280635     |
| 3384 | IMPDH1  | ENSG00000106348 | 7:128400891-128401014:-     | 0.02681787 | 0.132191239   | 0.105106519     |
| 3385 | CCDC136 | ENSG00000128596 | 7:128805901-128817757:+     | 5.44E-05   | 0.125249263   | 0.090470652     |
| 3386 | CCDC136 | ENSG00000128596 | 7:128810366-128811799:+     | 0.00256682 | 0.410910273   | 0.464993961     |
| 3387 | CCDC136 | ENSG00000128596 | 7:128812312-128812707:+     | 0.00125605 | 0.202742592   | 0.255335765     |
| 3388 | CCDC136 | ENSG00000128596 | 7:128817864-128821798:+     | 0.00539152 | 0.167873724   | 0.134092095     |
| 3389 | COPG2   | ENSG00000158623 | 7:130506806-130507273:-     | 9.23E-05   | 0.116420384   | 0.067323322     |
| 3390 | COPG2   | ENSG00000158623 | 7:130507372-130507684:-     | 0.00014499 | 0.113581441   | 0.071427159     |
| 3391 | WDR91   | ENSG00000105875 | 7:135186315-135186971:-     | 3.17E-05   | 0.162291763   | 0.112405204     |
| 3392 | WDR91   | ENSG00000105875 | 7:135187169-135188432:-     | 0.00565554 | 0.321336451   | 0.273110675     |
| 3393 | WDR91   | ENSG00000105875 | 7:135188545-135189343:-     | 0.00928558 | 0.205693737   | 0.168648864     |
| 3394 | WDR91   | ENSG00000105875 | 7:135195084-135196143:-     | 0.00378048 | 0.109015536   | 0.078975671     |
| 3395 | MKRN1   | ENSG00000133606 | 7:140455233-140455789:-     | 0.01634658 | 0.09427583    | 0.131620606     |
| 3396 | ADCK2   | ENSG00000133597 | 7:140690813-140694662:+     | 0.01683685 | 0.147021183   | 0.117544808     |
| 3397 | GSTK1   | ENSG00000197448 | 7:143263585-143264085:+     | 0.00109443 | 0.189261863   | 0.149781074     |
| 3398 | GSTK1   | ENSG00000197448 | 7:143264167-143264547:+     | 0.00015666 | 0.211063163   | 0.159402613     |
| 3399 | GSTK1   | ENSG00000197448 | 7:143264676-143264991:+     | 0.00236911 | 0.264639793   | 0.222585675     |
| 3400 | GSTK1   | ENSG00000197448 | 7:143267733-143268090:+     | 0.02007727 | 0.170515944   | 0.14179446      |
| 3401 | GSTK1   | ENSG00000197448 | 7:143268184-143268787:+     | 0.03849202 | 0.116965444   | 0.098193865     |
| 3402 | CUL1    | ENSG00000055130 | 7:148799388-148800501:+     | 0.02040181 | 0.093780537   | 0.079188055     |
| 3403 | ZNF767P | ENSG00000133624 | 7:149549374-149550867:-     | 0.01258799 | 0.265634707   | 0.214075355     |
| 3404 | ZNF775  | ENSG00000196456 | 7:150408488-150410159:+     | 0.00543752 | 0.179976585   | 0.220779269     |
| 3405 | KCNH2   | ENSG00000055118 | 7:150950420-150950920:-     | 0.00035745 | 0.116284881   | 0.074274178     |
| 3406 | KCNH2   | ENSG00000055118 | 7:150951120-150951447:-     | 0.0011659  | 0.265213439   | 0.210015014     |
| 3407 | ABC8    | ENSG00000197150 | 7:151034829-151035580:+     | 0.00241968 | 0.097932972   | 0.071843691     |
| 3408 | ABC8    | ENSG00000197150 | 7:151035742-151035881:+     | 0.02148409 | 0.116080599   | 0.0938092       |
| 3409 | ABC8    | ENSG00000197150 | 7:151040634-151040827:+     | 0.04053302 | 0.080549287   | 0.06998156      |
| 3410 | ABC8    | ENSG00000197150 | 7:151040922-151041098:+     | 0.0066169  | 0.100973965   | 0.081973929     |
| 3411 | ABC8    | ENSG00000197150 | 7:151041232-151041960:+     | 0.04798984 | 0.119772348   | 0.104562979     |
| 3412 | ABC8    | ENSG00000197150 | 7:151042108-151043970:+     | 0.00051816 | 0.136334501   | 0.099861877     |
| 3413 | ASIC3   | ENSG00000213199 | 7:151051095-151051171:+     | 0.00868036 | 0.094830208   | 0.072476155     |
| 3414 | ASIC3   | ENSG00000213199 | 7:151051319-151051809:+     | 0.00961612 | 0.09558635    | 0.073634821     |
| 3415 | ASIC3   | ENSG00000213199 | 7:151051901-151051982:+     | 0.01473012 | 0.110074555   | 0.09029291      |
| 3416 | SLC4A2  | ENSG00000164889 | 7:151076186-151076286:+     | 0.00954775 | 0.159856939   | 0.131231896     |
| 3417 | FASTK   | ENSG00000164896 | 7:151077236-151077309:-     | 0.01796969 | 0.313637366   | 0.266790649     |
| 3418 | FASTK   | ENSG00000164896 | 7:151077401-151077620:-     | 3.84E-05   | 0.611182744   | 0.532239195     |
| 3419 | FASTK   | ENSG00000164896 | 7:151077780-151077878:-     | 0.00078274 | 0.423239122   | 0.364126597     |
| 3420 | FASTK   | ENSG00000164896 | 7:151079021-151079499:-     | 3.18E-07   | 0.471500728   | 0.365242532     |

| S/N  | Gene     | Ensembl ID      | Position of retained intron | p-value    | AD_IR_average | Cont_IR_average |
|------|----------|-----------------|-----------------------------|------------|---------------|-----------------|
| 3421 | AGAP3    | ENSG00000133612 | 7:151134568-151141897:+     | 0.00629287 | 0.070394271   | 0.078175613     |
| 3422 | NUB1     | ENSG00000013374 | 7:151341846-151345347:+     | 6.59E-06   | 0.060504348   | 0.130787408     |
| 3423 | NUB1     | ENSG00000013374 | 7:151375943-151376633:+     | 0.01836301 | 0.133272934   | 0.109994747     |
| 3424 | DPP6     | ENSG00000130226 | 7:154889530-154892333:+     | 0.02073114 | 0.16912296    | 0.147761674     |
| 3425 | PAXIP1   | ENSG00000157212 | 7:154957294-154959889:-     | 0.01814913 | 0.100162077   | 0.073854668     |
| 3426 | PAXIP1   | ENSG00000157212 | 7:154959933-154960892:-     | 0.00078456 | 0.088265346   | 0.06153696      |
| 3427 | PAXIP1   | ENSG00000157212 | 7:154963766-154967815:-     | 0.02069505 | 0.136538817   | 0.116145434     |
| 3428 | WDR60    | ENSG00000126870 | 7:158926463-158926991:+     | 0.00116915 | 0.08480859    | 0.063496125     |
| 3429 | WDR60    | ENSG00000126870 | 7:158927043-158930454:+     | 0.00389379 | 0.094435309   | 0.07648173      |
| 3430 | MCPH1    | ENSG00000147316 | 8:6621691-6642993:+         | 0.00266779 | 0.100214538   | 0.072061231     |
| 3431 | VPS37A   | ENSG00000155975 | 8:17284616-17286346:+       | 0.00264949 | 0.093677599   | 0.067426723     |
| 3432 | VPS37A   | ENSG00000155975 | 8:17286427-17294986:+       | 0.00119321 | 0.163922778   | 0.123344755     |
| 3433 | INTS10   | ENSG00000104613 | 8:19844238-19845703:+       | 0.00046874 | 0.132550459   | 0.10113069      |
| 3434 | INTS10   | ENSG00000104613 | 8:19845797-19851648:+       | 0.03712139 | 0.14327501    | 0.129887448     |
| 3435 | INTS10   | ENSG00000104613 | 8:19849239-19851648:+       | 0.0019587  | 0.142839745   | 0.126211603     |
| 3436 | XPO7     | ENSG00000130227 | 8:22004030-22004994:+       | 0.00585397 | 0.155059735   | 0.124815458     |
| 3437 | NPM2     | ENSG00000158806 | 8:22034544-22036492:+       | 5.53E-05   | 0.214719582   | 0.177481695     |
| 3438 | DMTN     | ENSG00000158856 | 8:22067682-22069015:+       | 0.00211442 | 0.085651485   | 0.081451332     |
| 3439 | DMTN     | ENSG00000158856 | 8:22069060-22069418:+       | 0.00305047 | 0.093833571   | 0.09327283      |
| 3440 | DMTN     | ENSG00000158856 | 8:22080625-22080804:+       | 0.00092333 | 0.10746877    | 0.097432008     |
| 3441 | DMTN     | ENSG00000158856 | 8:22080870-22081112:+       | 0.00039862 | 0.097895806   | 0.089604125     |
| 3442 | FAM160B2 | ENSG00000158863 | 8:22094518-22096336:+       | 1.38E-07   | 0.291241646   | 0.204732668     |
| 3443 | FAM160B2 | ENSG00000158863 | 8:22097620-22097716:+       | 0.00078296 | 0.117478572   | 0.151281355     |
| 3444 | FAM160B2 | ENSG00000158863 | 8:22100972-22101439:+       | 7.27E-07   | 0.370861927   | 0.460253052     |
| 3445 | FAM160B2 | ENSG00000158863 | 8:22101530-22101707:+       | 3.00E-08   | 0.320356354   | 0.416407182     |
| 3446 | FAM160B2 | ENSG00000158863 | 8:22101851-22102174:+       | 1.04E-06   | 0.337123793   | 0.426821026     |
| 3447 | FAM160B2 | ENSG00000158863 | 8:22102315-22102527:+       | 0.00554404 | 0.108418982   | 0.126182314     |
| 3448 | FAM160B2 | ENSG00000158863 | 8:22102628-22102792:+       | 0.00432318 | 0.221491712   | 0.251682026     |
| 3449 | BMP1     | ENSG00000168487 | 8:22207516-22209444:+       | 0.02879492 | 0.188100346   | 0.21135401      |
| 3450 | PPP3CC   | ENSG00000120910 | 8:22533018-22539468:+       | 0.02713583 | 0.120891874   | 0.109575799     |
| 3451 | SORBS3   | ENSG00000120896 | 8:22561931-22563986:+       | 0.00016369 | 0.182271461   | 0.137702403     |
| 3452 | SORBS3   | ENSG00000120896 | 8:22566484-22566660:+       | 0.04051773 | 0.151986201   | 0.144851231     |
| 3453 | SORBS3   | ENSG00000120896 | 8:22566713-22566821:+       | 0.0047445  | 0.309590329   | 0.268223429     |
| 3454 | AC037459 | ENSG00000248235 | 8:22589741-22591550:+       | 0.00010195 | 0.13851818    | 0.137586892     |
| 3455 | PDLIM2   | ENSG00000120913 | 8:22589741-22593732:+       | 0.00560008 | 0.132214974   | 0.131601595     |
| 3456 | AC037459 | ENSG00000248235 | 8:22591668-22593732:+       | 0.00030503 | 0.131451804   | 0.133073171     |
| 3457 | CCAR2    | ENSG00000158941 | 8:22613136-22614091:+       | 0.00981422 | 0.172016646   | 0.224678026     |
| 3458 | BIN3     | ENSG00000147439 | 8:22624363-22629963:-       | 2.80E-05   | 0.240965635   | 0.178320944     |
| 3459 | CHMP7    | ENSG00000147457 | 8:23249381-23255246:+       | 0.00104068 | 0.065037389   | 0.099448394     |
| 3460 | CHMP7    | ENSG00000147457 | 8:23258449-23258731:+       | 0.00766845 | 0.117449741   | 0.107537042     |
| 3461 | R3HCC1   | ENSG00000104679 | 8:23294864-23295966:+       | 7.34E-05   | 0.135854146   | 0.1052231       |
| 3462 | STMN4    | ENSG0000015592  | 8:27236905-27239225:-       | 0.03187608 | 0.009776266   | 0.009599241     |
| 3463 | PTK2B    | ENSG00000120899 | 8:27431016-27431397:+       | 0.00758328 | 0.489146683   | 0.415485325     |
| 3464 | PTK2B    | ENSG00000120899 | 8:27451509-27453113:+       | 0.00274699 | 0.157634654   | 0.111309816     |
| 3465 | EPHX2    | ENSG00000120915 | 8:27518072-27520882:+       | 0.00017803 | 0.099279674   | 0.0625024       |
| 3466 | EPHX2    | ENSG00000120915 | 8:27543829-27544185:+       | 5.24E-14   | 0.237032854   | 0.1018437       |
| 3467 | EPHX2    | ENSG00000120915 | 8:27544244-27544443:+       | 1.25E-07   | 0.386943488   | 0.272295903     |
| 3468 | LETM2    | ENSG00000165046 | 8:38407463-38408211:+       | 0.01525125 | 0.76428072    | 0.716920395     |
| 3469 | FGFR1    | ENSG00000077782 | 8:38418373-38419532:-       | 0.04071395 | 0.094087223   | 0.110175548     |
| 3470 | GPAT4    | ENSG00000158669 | 8:41609955-41610735:+       | 0.0125522  | 0.446514439   | 0.414742273     |
| 3471 | GPAT4    | ENSG00000158669 | 8:41615048-41618683:+       | 6.31E-06   | 0.194566378   | 0.140175044     |
| 3472 | IKBKB    | ENSG00000104365 | 8:42319646-42320734:+       | 0.02098477 | 0.33477139    | 0.332440494     |
| 3473 | IKBKB    | ENSG00000104365 | 8:42322153-42322346:+       | 0.00694734 | 0.111783905   | 0.137534417     |
| 3474 | IKBKB    | ENSG00000104365 | 8:42326097-42329123:+       | 0.00024743 | 0.213636477   | 0.169250988     |
| 3475 | IKBKB    | ENSG00000104365 | 8:42329214-42330913:+       | 0.0271673  | 0.309205927   | 0.28742139      |
| 3476 | POLB     | ENSG00000070501 | 8:42338685-42339011:+       | 0.0002419  | 0.03942724    | 0.056470187     |
| 3477 | POLB     | ENSG00000070501 | 8:42339069-42344952:+       | 0.00202401 | 0.03863222    | 0.058286597     |

| S/N  | Gene    | Ensembl ID      | Position of retained intron | p-value    | AD_IR_average | Cont_IR_average |
|------|---------|-----------------|-----------------------------|------------|---------------|-----------------|
| 3478 | POLB    | ENSG00000070501 | 8:42350065-42352518:+       | 0.0275675  | 0.119760955   | 0.109767205     |
| 3479 | CSPP1   | ENSG00000104218 | 8:67154136-67158446:+       | 0.0053257  | 0.18321066    | 0.141778356     |
| 3480 | CSPP1   | ENSG00000104218 | 8:67193602-67195381:+       | 0.00362766 | 0.197437037   | 0.162447588     |
| 3481 | TRAM1   | ENSG00000067167 | 8:70575005-70583163:-       | 7.43E-05   | 0.094595748   | 0.055850744     |
| 3482 | TERF1   | ENSG00000147601 | 8:73027052-73032041:+       | 2.73E-07   | 0.057571422   | 0.07402893      |
| 3483 | ZFAND1  | ENSG00000104231 | 8:81714039-81714803:-       | 0.00466366 | 0.082317689   | 0.118976599     |
| 3484 | ZFAND1  | ENSG00000104231 | 8:81714895-81714986:-       | 9.96E-05   | 0.093273914   | 0.055492968     |
| 3485 | C8orf59 | ENSG00000176731 | 8:85214631-85214920:-       | 0.02927622 | 0.153508234   | 0.135091319     |
| 3486 | RMDN1   | ENSG00000176623 | 8:86477324-86478922:-       | 0.00338117 | 0.301067762   | 0.234790106     |
| 3487 | RMDN1   | ENSG00000176623 | 8:86480332-86484871:-       | 0.0472105  | 0.099228157   | 0.084958838     |
| 3488 | FAM92A  | ENSG00000188343 | 8:93708016-93709770:+       | 0.00027079 | 0.101184491   | 0.069365318     |
| 3489 | FAM92A  | ENSG00000188343 | 8:93718788-93726393:+       | 6.19E-09   | 0.168295054   | 0.108560662     |
| 3490 | FAM92A  | ENSG00000188343 | 8:93726513-93728204:+       | 2.80E-06   | 0.161576961   | 0.111493364     |
| 3491 | INTS8   | ENSG00000164941 | 8:94867196-94867275:+       | 1.78E-06   | 0.103801595   | 0.068048847     |
| 3492 | INTS8   | ENSG00000164941 | 8:94876147-94876220:+       | 0.00069551 | 0.109821587   | 0.088864652     |
| 3493 | MTERF3  | ENSG00000156469 | 8:96257114-96258356:-       | 0.04930819 | 0.105156051   | 0.116207797     |
| 3494 | TBC1D31 | ENSG00000156787 | 8:123150128-123151805:+     | 5.27E-05   | 0.125781112   | 0.088862114     |
| 3495 | C8orf76 | ENSG00000189376 | 8:123239144-123241229:-     | 0.02304686 | 0.111515391   | 0.096630821     |
| 3496 | PTK2    | ENSG00000169398 | 8:140668424-140669726:-     | 0.00496312 | 0.083975691   | 0.103661757     |
| 3497 | PTK2    | ENSG00000169398 | 8:140744767-140746759:-     | 0.01020517 | 0.111097123   | 0.164831227     |
| 3498 | ADGRB1  | ENSG00000181790 | 8:142522710-142524237:+     | 0.00039724 | 0.108426798   | 0.063908051     |
| 3499 | ADGRB1  | ENSG00000181790 | 8:142543708-142544219:+     | 0.008395   | 0.125820595   | 0.089207021     |
| 3500 | ZC3H3   | ENSG00000014164 | 8:143438087-143440040:-     | 6.69E-06   | 0.277093073   | 0.204455266     |
| 3501 | ZC3H3   | ENSG00000014164 | 8:143468540-143468616:-     | 0.00794175 | 0.124915755   | 0.096650673     |
| 3502 | NAPRT   | ENSG00000147813 | 8:143575345-143575422:-     | 0.0093171  | 0.202368778   | 0.163295761     |
| 3503 | TSTA3   | ENSG00000104522 | 8:143613603-143613750:-     | 4.70E-08   | 0.196618756   | 0.125984701     |
| 3504 | TSTA3   | ENSG00000104522 | 8:143614228-143614319:-     | 0.00149152 | 0.164979812   | 0.130686539     |
| 3505 | TSTA3   | ENSG00000104522 | 8:143614697-143614786:-     | 0.00078239 | 0.207633735   | 0.161697688     |
| 3506 | TSTA3   | ENSG00000104522 | 8:143614915-143616105:-     | 0.0127407  | 0.181843371   | 0.154673897     |
| 3507 | SCRIB   | ENSG00000180900 | 8:143791440-143791665:-     | 0.00975549 | 0.236641529   | 0.18466454      |
| 3508 | SCRIB   | ENSG00000180900 | 8:143791740-143791875:-     | 0.01581804 | 0.223647455   | 0.175637477     |
| 3509 | SCRIB   | ENSG00000180900 | 8:143791913-143791990:-     | 0.00010904 | 0.108374503   | 0.064890547     |
| 3510 | SCRIB   | ENSG00000180900 | 8:143793083-143793899:-     | 0.00090919 | 0.103099515   | 0.130934168     |
| 3511 | PUF60   | ENSG00000179950 | 8:143818534-143821596:-     | 9.56E-05   | 0.058272607   | 0.072782423     |
| 3512 | NRBP2   | ENSG00000185189 | 8:143836030-143836126:-     | 0.02841739 | 0.177976412   | 0.137634062     |
| 3513 | NRBP2   | ENSG00000185189 | 8:143839195-143839313:-     | 0.00034523 | 0.160273957   | 0.114140212     |
| 3514 | NRBP2   | ENSG00000185189 | 8:143839825-143839928:-     | 0.00036502 | 0.187260657   | 0.133489577     |
| 3515 | PARP10  | ENSG00000178685 | 8:143984431-143984543:-     | 0.02426872 | 0.077390716   | 0.099439768     |
| 3516 | GPAA1   | ENSG00000197858 | 8:144083303-144083388:+     | 0.00313761 | 0.107251033   | 0.083334118     |
| 3517 | GPAA1   | ENSG00000197858 | 8:144083500-144083713:+     | 0.02277449 | 0.495955037   | 0.455512169     |
| 3518 | GPAA1   | ENSG00000197858 | 8:144084875-144085042:+     | 0.04596745 | 0.257116049   | 0.223785075     |
| 3519 | SHARPIN | ENSG00000179526 | 8:144098788-144098865:-     | 0.02689863 | 0.233924354   | 0.199654027     |
| 3520 | SHARPIN | ENSG00000179526 | 8:144098994-144099080:-     | 7.80E-05   | 0.173250167   | 0.120151518     |
| 3521 | SHARPIN | ENSG00000179526 | 8:144103225-144103552:-     | 0.0001426  | 0.130184883   | 0.093003913     |
| 3522 | MROH1   | ENSG00000179832 | 8:144192401-144199121:+     | 0.00177613 | 0.07541486    | 0.119234597     |
| 3523 | MROH1   | ENSG00000179832 | 8:144247436-144247566:+     | 0.00178263 | 0.094538385   | 0.052892298     |
| 3524 | MROH1   | ENSG00000179832 | 8:144254978-144255508:+     | 0.01901021 | 0.108158912   | 0.081273315     |
| 3525 | MROH1   | ENSG00000179832 | 8:144255705-144258776:+     | 0.00217082 | 0.171172576   | 0.127309582     |
| 3526 | MROH1   | ENSG00000179832 | 8:144259354-144259910:+     | 0.0037154  | 0.199990474   | 0.145768488     |
| 3527 | MROH1   | ENSG00000179832 | 8:144260057-144260185:+     | 9.28E-06   | 0.176758451   | 0.112814891     |
| 3528 | MROH1   | ENSG00000179832 | 8:144260374-144260676:+     | 2.09E-06   | 0.480519549   | 0.372447844     |
| 3529 | MROH1   | ENSG00000179832 | 8:144260832-144260906:+     | 0.00120769 | 0.520605976   | 0.427055403     |
| 3530 | MROH1   | ENSG00000179832 | 8:144261041-144261113:+     | 0.0006     | 0.174150479   | 0.12026423      |
| 3531 | MROH1   | ENSG00000179832 | 8:144261216-144261283:+     | 1.35E-06   | 0.225544532   | 0.125432201     |
| 3532 | MROH1   | ENSG00000179832 | 8:144261349-144261654:+     | 5.13E-05   | 0.306160593   | 0.21786003      |
| 3533 | BOP1    | ENSG00000261236 | 8:144262317-144262395:-     | 0.02415147 | 0.298894904   | 0.249989496     |
| 3534 | HSF1    | ENSG00000185122 | 8:144309014-144309454:+     | 0.0330164  | 0.145997122   | 0.122730352     |



| S/N  | Gene      | Ensembl ID      | Position of retained intron | p-value    | AD_IR_average | Cont_IR_average |
|------|-----------|-----------------|-----------------------------|------------|---------------|-----------------|
| 3535 | DGAT1     | ENSG00000185000 | 8:144317109-144317186:-     | 0.00040836 | 0.441896976   | 0.371906247     |
| 3536 | DGAT1     | ENSG00000185000 | 8:144317445-144317543:-     | 0.00804831 | 0.174122355   | 0.145082006     |
| 3537 | DGAT1     | ENSG00000185000 | 8:144318362-144318460:-     | 0.00038173 | 0.118113702   | 0.153857472     |
| 3538 | DGAT1     | ENSG00000185000 | 8:144318566-144318698:-     | 0.00133835 | 0.133028174   | 0.165454388     |
| 3539 | DGAT1     | ENSG00000185000 | 8:144319068-144321320:-     | 0.00660706 | 0.132509084   | 0.159070583     |
| 3540 | DGAT1     | ENSG00000185000 | 8:144321408-144326436:-     | 1.53E-08   | 0.176557884   | 0.269571269     |
| 3541 | CPSF1     | ENSG00000071894 | 8:144395551-144396347:-     | 1.42E-06   | 0.631581012   | 0.722483805     |
| 3542 | CPSF1     | ENSG00000071894 | 8:144398132-144398301:-     | 0.03687507 | 0.128439097   | 0.097972549     |
| 3543 | CPSF1     | ENSG00000071894 | 8:144409172-144409288:-     | 0.03448551 | 0.187019877   | 0.15601896      |
| 3544 | VPS28     | ENSG00000160948 | 8:144423922-144424040:-     | 0.00486565 | 0.228337756   | 0.186254249     |
| 3545 | VPS28     | ENSG00000160948 | 8:144424132-144424214:-     | 1.04E-05   | 0.154225037   | 0.104271866     |
| 3546 | VPS28     | ENSG00000160948 | 8:144424268-144424717:-     | 0.01742822 | 0.197666122   | 0.165735331     |
| 3547 | CYHR1     | ENSG00000187954 | 8:144464612-144464808:-     | 0.00180172 | 0.082929644   | 0.105620368     |
| 3548 | KIFC2     | ENSG00000167702 | 8:144467779-144467858:+     | 0.00060248 | 0.107333263   | 0.07708201      |
| 3549 | KIFC2     | ENSG00000167702 | 8:144467987-144468328:+     | 3.88E-07   | 0.127890989   | 0.078316371     |
| 3550 | KIFC2     | ENSG00000167702 | 8:144468650-144468724:+     | 3.05E-05   | 0.127762191   | 0.08973721      |
| 3551 | PPP1R16A  | ENSG00000160972 | 8:144490212-144496460:+     | 0.00448037 | 0.088289621   | 0.108964712     |
| 3552 | PPP1R16A  | ENSG00000160972 | 8:144500391-144500486:+     | 0.00717735 | 0.158445962   | 0.185597673     |
| 3553 | MFSD3     | ENSG00000167700 | 8:144510722-144510793:+     | 0.00262898 | 0.386495537   | 0.321553351     |
| 3554 | RECQL4    | ENSG00000160957 | 8:144511555-144511680:-     | 0.01538713 | 0.118315115   | 0.164781175     |
| 3555 | RECQL4    | ENSG00000160957 | 8:144512067-144512143:-     | 0.00221076 | 0.21442311    | 0.281886423     |
| 3556 | RECQL4    | ENSG00000160957 | 8:144513480-144513570:-     | 8.14E-11   | 0.274571427   | 0.413470156     |
| 3557 | RECQL4    | ENSG00000160957 | 8:144513712-144513927:-     | 0.00677473 | 0.0695289     | 0.086868562     |
| 3558 | LRRC14    | ENSG00000160959 | 8:144520054-144520237:+     | 0.00057629 | 0.518340415   | 0.427901903     |
| 3559 | LRRC14    | ENSG00000160959 | 8:144520822-144520910:+     | 0.00036143 | 0.467454085   | 0.37108027      |
| 3560 | LRRC24    | ENSG00000254402 | 8:144524719-144524815:-     | 0.01874476 | 0.543634317   | 0.588395377     |
| 3561 | ARHGAP39  | ENSG00000147799 | 8:144548489-144555559:-     | 0.03524882 | 0.075931335   | 0.089609473     |
| 3562 | RPL8      | ENSG00000161016 | 8:144792140-144792244:-     | 0.01153031 | 0.015797405   | 0.012072811     |
| 3563 | KANK1     | ENSG00000107104 | 9:742405-744490:+           | 0.00357965 | 0.113031265   | 0.088572475     |
| 3564 | UBAP2     | ENSG00000137073 | 9:33923033-33923185:-       | 0.00026837 | 0.279480963   | 0.213743414     |
| 3565 | UBAP2     | ENSG00000137073 | 9:33923293-33923378:-       | 0.00345755 | 0.129237085   | 0.10496199      |
| 3566 | C9orf24   | ENSG00000164972 | 9:34379181-34379645:-       | 0.01240226 | 0.231886238   | 0.176860083     |
| 3567 | SIGMAR1   | ENSG00000147955 | 9:34637089-34637219:-       | 0.03092973 | 0.33539261    | 0.289262151     |
| 3568 | GALT      | ENSG00000213930 | 9:34649081-34649409:+       | 0.02987577 | 0.379255159   | 0.339449169     |
| 3569 | GALT      | ENSG00000213930 | 9:34649564-34650368:+       | 1.56E-05   | 0.204339735   | 0.149566562     |
| 3570 | IL11RA    | ENSG00000137070 | 9:34655665-34656738:+       | 0.00368895 | 0.406269549   | 0.324529377     |
| 3571 | IL11RA    | ENSG00000137070 | 9:34656908-34657034:+       | 0.00285471 | 0.281389122   | 0.213943525     |
| 3572 | RP11-195F | ENSG00000187186 | 9:34665190-34665313:-       | 0.00393986 | 0.224280756   | 0.178105658     |
| 3573 | FANCG     | ENSG00000221829 | 9:35075082-35075278:-       | 0.00494683 | 0.236737902   | 0.204757539     |
| 3574 | PIGO      | ENSG00000165282 | 9:35089221-35089379:-       | 0.02386294 | 0.095703817   | 0.12138439      |
| 3575 | PIGO      | ENSG00000165282 | 9:35090280-35090465:-       | 0.04007546 | 0.060387021   | 0.074406559     |
| 3576 | STOML2    | ENSG00000165283 | 9:35100726-35100931:-       | 0.00887296 | 0.11050253    | 0.092086106     |
| 3577 | RUSC2     | ENSG00000198853 | 9:35560851-35560959:+       | 0.03126349 | 0.141632983   | 0.159590014     |
| 3578 | TESK1     | ENSG00000107140 | 9:35606285-35606836:+       | 5.10E-09   | 0.116922509   | 0.068624021     |
| 3579 | TESK1     | ENSG00000107140 | 9:35607409-35607581:+       | 0.02214643 | 0.250214756   | 0.239294835     |
| 3580 | TESK1     | ENSG00000107140 | 9:35607672-35607927:+       | 0.0462568  | 0.105669237   | 0.094011926     |
| 3581 | TLN1      | ENSG00000137076 | 9:35704174-35704331:-       | 0.00867575 | 0.246596927   | 0.295463961     |
| 3582 | GBA2      | ENSG00000070610 | 9:35738152-35738231:-       | 0.01664192 | 0.245311037   | 0.280181442     |
| 3583 | GBA2      | ENSG00000070610 | 9:35738374-35738525:-       | 0.00464364 | 0.30557739    | 0.354746909     |
| 3584 | GBA2      | ENSG00000070610 | 9:35738632-35738751:-       | 0.00028289 | 0.281384171   | 0.348004701     |
| 3585 | NPR2      | ENSG00000159899 | 9:35802607-35802731:+       | 0.01088539 | 0.074404754   | 0.06545021      |
| 3586 | TMEM8B    | ENSG00000137103 | 9:35834650-35835010:+       | 0.00517062 | 0.132171923   | 0.185156182     |
| 3587 | TMEM8B    | ENSG00000137103 | 9:35846611-35846816:+       | 0.00014483 | 0.10578206    | 0.066058113     |
| 3588 | CLTA      | ENSG00000122705 | 9:36204179-36211602:+       | 0.00369401 | 0.035830696   | 0.026565794     |
| 3589 | CLTA      | ENSG00000122705 | 9:36209320-36211602:+       | 0.00011925 | 0.034609863   | 0.028961005     |
| 3590 | TRMT10B   | ENSG00000165275 | 9:37770739-37776281:+       | 0.01083326 | 0.718496024   | 0.676560805     |
| 3591 | TRMT10B   | ENSG00000165275 | 9:37776405-37777600:+       | 0.00077092 | 0.724852354   | 0.661953662     |

| S/N  | Gene     | Ensembl ID      | Position of retained intron | p-value    | AD_IR_average | Cont_IR_average |
|------|----------|-----------------|-----------------------------|------------|---------------|-----------------|
| 3592 | EXOSC3   | ENSG00000107371 | 9:37780880-37781985:-       | 0.00062634 | 0.063516167   | 0.0780741       |
| 3593 | NMRK1    | ENSG00000106733 | 9:75077580-75083086:-       | 0.04171145 | 0.085361857   | 0.068201808     |
| 3594 | CTSL     | ENSG00000135047 | 9:87730498-87731007:+       | 0.00513564 | 0.12915466    | 0.151088949     |
| 3595 | GADD45G  | ENSG00000130222 | 9:89605174-89605431:+       | 0.00795264 | 0.090848261   | 0.087423856     |
| 3596 | GADD45G  | ENSG00000130222 | 9:89605533-89605666:+       | 0.02267251 | 0.070285471   | 0.066939283     |
| 3597 | AUH      | ENSG00000148090 | 9:91214425-91216058:-       | 0.00738883 | 0.159101329   | 0.131531175     |
| 3598 | AUH      | ENSG00000148090 | 9:91216106-91217276:-       | 0.00024854 | 0.141311071   | 0.096507708     |
| 3599 | SPTLC1   | ENSG00000090054 | 9:92032558-92034809:-       | 4.03E-06   | 0.169147424   | 0.11168324      |
| 3600 | NOL8     | ENSG00000198000 | 9:92310675-92311145:-       | 0.0177939  | 0.205288956   | 0.194927896     |
| 3601 | IPPK     | ENSG00000127080 | 9:92616057-92619485:-       | 0.04100787 | 0.093764832   | 0.111579238     |
| 3602 | CARD19   | ENSG00000165233 | 9:93107816-93110567:+       | 0.00246189 | 0.169010372   | 0.151907455     |
| 3603 | CARD19   | ENSG00000165233 | 9:93111938-93112217:+       | 0.03258223 | 0.565264756   | 0.56127961      |
| 3604 | WNK2     | ENSG00000165238 | 9:93300149-93306776:+       | 0.03687987 | 0.363501372   | 0.32063913      |
| 3605 | WNK2     | ENSG00000165238 | 9:93306821-93308327:+       | 0.00836195 | 0.178767209   | 0.152565151     |
| 3606 | NCBP1    | ENSG00000136937 | 9:97668974-97669592:+       | 0.01550307 | 0.241763268   | 0.287826455     |
| 3607 | XPA      | ENSG00000136936 | 9:97687261-97689533:-       | 0.00794652 | 0.162233424   | 0.114653089     |
| 3608 | ANKS6    | ENSG00000165138 | 9:98782573-98783952:-       | 0.00382365 | 0.080584949   | 0.060309004     |
| 3609 | ANKS6    | ENSG00000165138 | 9:98784876-98790103:-       | 0.02759048 | 0.450649515   | 0.384546431     |
| 3610 | TEX10    | ENSG00000136891 | 9:100302304-100303631:-     | 1.62E-14   | 0.284790705   | 0.183483014     |
| 3611 | TEX10    | ENSG00000136891 | 9:100308681-100310298:-     | 4.44E-15   | 0.214141083   | 0.121608678     |
| 3612 | TEX10    | ENSG00000136891 | 9:100310379-100320264:-     | 0.00011593 | 0.231656506   | 0.184215006     |
| 3613 | CTNNAL1  | ENSG00000119326 | 9:108944018-108948185:-     | 0.00779309 | 0.095630588   | 0.075119689     |
| 3614 | KIAA0368 | ENSG00000136813 | 9:111383332-111384521:-     | 0.00188988 | 0.163255587   | 0.133978043     |
| 3615 | KIAA0368 | ENSG00000136813 | 9:111384569-111385336:-     | 0.00048767 | 0.12035099    | 0.079838221     |
| 3616 | ALAD     | ENSG00000148218 | 9:113390676-113390797:-     | 0.00495826 | 0.54497311    | 0.49650404      |
| 3617 | ALAD     | ENSG00000148218 | 9:113391623-113392118:-     | 0.0070871  | 0.134953378   | 0.114573138     |
| 3618 | CDK5RAP2 | ENSG00000136861 | 9:120389787-120394511:-     | 1.05E-14   | 0.208061084   | 0.126188465     |
| 3619 | CDK5RAP2 | ENSG00000136861 | 9:120403071-120404035:-     | 0.00606492 | 0.21997363    | 0.250759613     |
| 3620 | CDK5RAP2 | ENSG00000136861 | 9:120407248-120408346:-     | 0.00086616 | 0.088298061   | 0.068937569     |
| 3621 | CDK5RAP2 | ENSG00000136861 | 9:120439972-120443619:-     | 0.01189649 | 0.289911802   | 0.238197478     |
| 3622 | FBXW2    | ENSG00000119402 | 9:120776226-120778350:-     | 0.00577619 | 0.13090971    | 0.171806219     |
| 3623 | PHF19    | ENSG00000119403 | 9:120862005-120862587:-     | 0.00709182 | 0.066730513   | 0.05126865      |
| 3624 | CNTRL    | ENSG00000119397 | 9:121175224-121177162:+     | 0.001151   | 0.158249351   | 0.121711914     |
| 3625 | DAB2IP   | ENSG00000136848 | 9:121776391-121781463:+     | 0.00286689 | 0.102108412   | 0.078648691     |
| 3626 | GARNL3   | ENSG00000136895 | 9:127353944-127354293:+     | 0.03116981 | 0.092793955   | 0.083039056     |
| 3627 | GARNL3   | ENSG00000136895 | 9:127383545-127385026:+     | 0.00059952 | 0.222693616   | 0.177063753     |
| 3628 | GARNL3   | ENSG00000136895 | 9:127387331-127388903:+     | 2.08E-07   | 0.111642946   | 0.074236545     |
| 3629 | SLC2A8   | ENSG00000136856 | 9:127404067-127404817:+     | 0.02394269 | 0.147396309   | 0.122704381     |
| 3630 | SLC2A8   | ENSG00000136856 | 9:127404991-127405419:+     | 0.00017208 | 0.26105109    | 0.20109399      |
| 3631 | SLC2A8   | ENSG00000136856 | 9:127405565-127407111:+     | 0.00017429 | 0.104393802   | 0.081988642     |
| 3632 | LRSAM1   | ENSG00000148356 | 9:127451669-127451928:+     | 0.0092784  | 0.417986744   | 0.368616974     |
| 3633 | LRSAM1   | ENSG00000148356 | 9:127452084-127454495:+     | 0.017445   | 0.152031721   | 0.132712888     |
| 3634 | LRSAM1   | ENSG00000148356 | 9:127492897-127495319:+     | 2.36E-08   | 0.284074355   | 0.207745403     |
| 3635 | LRSAM1   | ENSG00000148356 | 9:127495418-127495963:+     | 3.16E-10   | 0.29802372    | 0.208827284     |
| 3636 | LRSAM1   | ENSG00000148356 | 9:127496095-127497252:+     | 3.42E-06   | 0.135484016   | 0.095248255     |
| 3637 | LRSAM1   | ENSG00000148356 | 9:127497334-127501009:+     | 3.46E-05   | 0.18421963    | 0.136694397     |
| 3638 | FAM129B  | ENSG00000136830 | 9:127509131-127510145:-     | 0.01124312 | 0.101277513   | 0.081807496     |
| 3639 | SH2D3C   | ENSG00000095370 | 9:127738921-127739681:-     | 0.04744687 | 0.128944663   | 0.110009873     |
| 3640 | SH2D3C   | ENSG00000095370 | 9:127739888-127740257:-     | 0.01140288 | 0.100989935   | 0.078854343     |
| 3641 | SH2D3C   | ENSG00000095370 | 9:127740369-127741787:-     | 0.00109481 | 0.154482459   | 0.115947817     |
| 3642 | FPGS     | ENSG00000136877 | 9:127808311-127808557:+     | 0.00918586 | 0.072053998   | 0.052477767     |
| 3643 | FPGS     | ENSG00000136877 | 9:127808889-127809683:+     | 0.01808012 | 0.140147977   | 0.103021631     |
| 3644 | ENG      | ENSG00000106991 | 9:127820037-127824303:-     | 0.00141636 | 0.093787916   | 0.154573627     |
| 3645 | ST6GALNA | ENSG00000136840 | 9:127908581-127909950:-     | 0.00620849 | 0.236821451   | 0.210218145     |
| 3646 | ST6GALNA | ENSG00000136840 | 9:127910058-127912267:-     | 1.11E-05   | 0.160602672   | 0.133446119     |
| 3647 | DPM2     | ENSG00000136908 | 9:127936655-127937433:-     | 3.75E-07   | 0.482543683   | 0.38670874      |
| 3648 | DPM2     | ENSG00000136908 | 9:127937523-127937817:-     | 4.32E-07   | 0.456372707   | 0.349251545     |

| S/N  | Gene      | Ensembl ID      | Position of retained intron | p-value    | AD_IR_average | Cont_IR_average |
|------|-----------|-----------------|-----------------------------|------------|---------------|-----------------|
| 3649 | FAM102A   | ENSG00000167106 | 9:127948225-127948367:-     | 0.02160436 | 0.153360628   | 0.139508406     |
| 3650 | FAM102A   | ENSG00000167106 | 9:127953604-127953804:-     | 0.04962149 | 0.104015501   | 0.084161823     |
| 3651 | CIZ1      | ENSG00000148337 | 9:128178490-128178708:-     | 1.25E-05   | 0.076838524   | 0.109824216     |
| 3652 | DNM1      | ENSG00000106976 | 9:128247935-128248582:+     | 0.01128854 | 0.093115091   | 0.077659916     |
| 3653 | GOLGA2    | ENSG00000167110 | 9:128262704-128263033:-     | 0.01712739 | 0.195973541   | 0.169894565     |
| 3654 | GOLGA2    | ENSG00000167110 | 9:128265881-128265969:-     | 0.00798138 | 0.099314772   | 0.144997271     |
| 3655 | URM1      | ENSG00000167118 | 9:128389309-128389665:+     | 0.0047128  | 0.217834011   | 0.180830682     |
| 3656 | CERCAM    | ENSG00000167123 | 9:128422978-128423145:+     | 0.00051049 | 0.21145101    | 0.150966165     |
| 3657 | CERCAM    | ENSG00000167123 | 9:128423263-128424137:+     | 8.04E-05   | 0.136485716   | 0.097964288     |
| 3658 | PKN3      | ENSG00000160447 | 9:128713642-128714045:+     | 0.03269095 | 0.091512517   | 0.072151748     |
| 3659 | ZER1      | ENSG00000160445 | 9:128735431-128739930:-     | 0.00011024 | 0.222546512   | 0.185468208     |
| 3660 | ENDOG     | ENSG00000167136 | 9:128820848-128822327:+     | 4.14E-06   | 0.450016439   | 0.366098065     |
| 3661 | SPOUT1    | ENSG00000198917 | 9:128826152-128826383:-     | 0.00024378 | 0.558825159   | 0.489040584     |
| 3662 | KYAT1     | ENSG00000171097 | 9:128833643-128833739:-     | 1.08E-07   | 0.16001219    | 0.225315588     |
| 3663 | KYAT1     | ENSG00000171097 | 9:128835402-128835480:-     | 0.00010373 | 0.108174459   | 0.077366905     |
| 3664 | NUP188    | ENSG00000095319 | 9:128993403-128993524:+     | 0.0014821  | 0.159523932   | 0.226642976     |
| 3665 | NUP188    | ENSG00000095319 | 9:128994442-128994855:+     | 0.00046857 | 0.180940932   | 0.248484379     |
| 3666 | NUP188    | ENSG00000095319 | 9:128999805-129001528:+     | 0.01797267 | 0.189001552   | 0.161592165     |
| 3667 | NUP188    | ENSG00000095319 | 9:129001976-129002816:+     | 0.04028288 | 0.165071599   | 0.141494157     |
| 3668 | NUP188    | ENSG00000095319 | 9:129005530-129005644:+     | 0.01831978 | 0.330785951   | 0.289827439     |
| 3669 | NUP188    | ENSG00000095319 | 9:129005776-129006049:+     | 0.0017243  | 0.345247829   | 0.299200234     |
| 3670 | NUP188    | ENSG00000095319 | 9:129006123-129006238:+     | 0.00221753 | 0.29372889    | 0.247824927     |
| 3671 | NUP188    | ENSG00000095319 | 9:129006368-129006501:+     | 0.00491017 | 0.281658857   | 0.239982888     |
| 3672 | SH3GLB2   | ENSG00000148341 | 9:129008791-129009105:-     | 0.00011138 | 0.21842601    | 0.157228417     |
| 3673 | SH3GLB2   | ENSG00000148341 | 9:129009346-129009770:-     | 5.43E-05   | 0.066241368   | 0.040989771     |
| 3674 | MIGA2     | ENSG00000148343 | 9:129069129-129069848:+     | 0.04058813 | 0.303486646   | 0.265876805     |
| 3675 | DOLPP1    | ENSG00000167130 | 9:129085107-129085206:+     | 0.0207057  | 0.124994427   | 0.101986422     |
| 3676 | PTPA      | ENSG00000119383 | 9:129140151-129142444:+     | 0.00038043 | 0.015276563   | 0.010806343     |
| 3677 | USP20     | ENSG00000136878 | 9:129874756-129874828:+     | 0.03075371 | 0.18072567    | 0.154614492     |
| 3678 | FNBP1     | ENSG00000187239 | 9:129890546-129895837:-     | 0.00646629 | 0.128141366   | 0.158889065     |
| 3679 | FNBP1     | ENSG00000187239 | 9:129915980-129923843:-     | 0.00294531 | 0.206325544   | 0.243991483     |
| 3680 | FUBP3     | ENSG00000107164 | 9:130613027-130614287:+     | 0.00617702 | 0.098796321   | 0.069579074     |
| 3681 | FUBP3     | ENSG00000107164 | 9:130614345-130616354:+     | 0.03546129 | 0.132348141   | 0.103701968     |
| 3682 | FUBP3     | ENSG00000107164 | 9:130632278-130634666:+     | 0.00582586 | 0.182486644   | 0.151911382     |
| 3683 | EXOSC2    | ENSG00000130713 | 9:130698251-130699328:+     | 0.04223933 | 0.109788644   | 0.099758671     |
| 3684 | EXOSC2    | ENSG00000130713 | 9:130700935-130702133:+     | 0.00204125 | 0.546682768   | 0.495157922     |
| 3685 | EXOSC2    | ENSG00000130713 | 9:130702310-130703052:+     | 0.00898473 | 0.101916344   | 0.124804735     |
| 3686 | POMT1     | ENSG00000130714 | 9:131504340-131506113:+     | 6.00E-05   | 0.20209854    | 0.27339507      |
| 3687 | POMT1     | ENSG00000130714 | 9:131509022-131509742:+     | 0.03456507 | 0.130911051   | 0.159067        |
| 3688 | UCK1      | ENSG00000130717 | 9:131525977-131528943:-     | 0.00014958 | 0.100015072   | 0.074282582     |
| 3689 | MED27     | ENSG00000160563 | 9:131863140-131884057:-     | 8.31E-05   | 0.099926762   | 0.070260044     |
| 3690 | NTNG2     | ENSG00000196358 | 9:132239271-132240909:+     | 2.68E-05   | 0.109900634   | 0.069159242     |
| 3691 | TSC1      | ENSG00000165699 | 9:132904454-132905580:-     | 0.04359566 | 0.144328004   | 0.124527465     |
| 3692 | RALGDS    | ENSG00000160271 | 9:133101762-133101937:-     | 0.0138403  | 0.184991857   | 0.215202732     |
| 3693 | MED22     | ENSG00000148297 | 9:133345252-133346539:-     | 0.01869121 | 0.166868284   | 0.142125568     |
| 3694 | SURF1     | ENSG00000148290 | 9:133354957-133356268:-     | 0.02020325 | 0.085442044   | 0.070105012     |
| 3695 | LINC00094 | ENSG00000235106 | 9:134026090-134026207:+     | 0.00061185 | 0.12936006    | 0.176458374     |
| 3696 | WDR5      | ENSG00000196363 | 9:134154541-134155339:+     | 0.03408932 | 0.137141637   | 0.117925419     |
| 3697 | WDR5      | ENSG00000196363 | 9:134156593-134157892:+     | 0.00130851 | 0.303915488   | 0.260559247     |
| 3698 | QSOX2     | ENSG00000165661 | 9:136219164-136221795:-     | 0.00513278 | 0.089344455   | 0.131053947     |
| 3699 | GPSM1     | ENSG00000160360 | 9:136348767-136349586:+     | 0.03867627 | 0.112396221   | 0.128308091     |
| 3700 | SNAPC4    | ENSG00000165684 | 9:136392594-136392672:-     | 0.01326416 | 0.191781104   | 0.147152399     |
| 3701 | SDCCAG3   | ENSG00000165689 | 9:136404693-136405090:-     | 0.00889982 | 0.471932963   | 0.43175239      |
| 3702 | PMPCA     | ENSG00000165688 | 9:136416391-136416950:+     | 0.01052519 | 0.305473927   | 0.268070974     |
| 3703 | PMPCA     | ENSG00000165688 | 9:136421976-136423094:+     | 0.01438316 | 0.090623533   | 0.105461186     |
| 3704 | INPP5E    | ENSG00000148384 | 9:136429807-136430276:-     | 0.03573392 | 0.150303743   | 0.128298973     |
| 3705 | INPP5E    | ENSG00000148384 | 9:136430413-136431001:-     | 0.04892375 | 0.263653634   | 0.230900042     |

| S/N  | Gene     | Ensembl ID      | Position of retained intron | p-value    | AD_IR_average | Cont_IR_average |
|------|----------|-----------------|-----------------------------|------------|---------------|-----------------|
| 3706 | INPP5E   | ENSG00000148384 | 9:136432586-136432955:-     | 0.02687827 | 0.311608399   | 0.26710579      |
| 3707 | INPP5E   | ENSG00000148384 | 9:136433075-136433154:-     | 0.00568824 | 0.277774348   | 0.224015693     |
| 3708 | SEC16A   | ENSG00000148396 | 9:136445719-136446854:-     | 0.02709495 | 0.103808278   | 0.087946171     |
| 3709 | SEC16A   | ENSG00000148396 | 9:136447680-136447852:-     | 0.00555915 | 0.079349238   | 0.10844637      |
| 3710 | SEC16A   | ENSG00000148396 | 9:136447909-136448083:-     | 0.00560834 | 0.078318388   | 0.10429986      |
| 3711 | SEC16A   | ENSG00000148396 | 9:136455793-136456052:-     | 0.01190562 | 0.136751394   | 0.178718697     |
| 3712 | PHPT1    | ENSG00000054148 | 9:136850560-136850754:+     | 0.00655322 | 0.149891968   | 0.134409748     |
| 3713 | MAMDC4   | ENSG00000177943 | 9:136857586-136857658:+     | 0.02217494 | 0.498554317   | 0.410533935     |
| 3714 | MAMDC4   | ENSG00000177943 | 9:136859317-136859885:+     | 0.00219525 | 0.356887437   | 0.272791036     |
| 3715 | MAMDC4   | ENSG00000177943 | 9:136860064-136860561:+     | 0.0242077  | 0.166823771   | 0.122445984     |
| 3716 | FBXW5    | ENSG00000159069 | 9:136942466-136942546:-     | 0.04612492 | 0.131825412   | 0.146239755     |
| 3717 | PTGDS    | ENSG00000107317 | 9:136979299-136979945:+     | 0.02367459 | 0.077411029   | 0.08440249      |
| 3718 | C9orf142 | ENSG00000148362 | 9:136992562-136992639:+     | 0.03152944 | 0.344283472   | 0.295554457     |
| 3719 | ABCA2    | ENSG00000107331 | 9:137016471-137016573:-     | 0.00190269 | 0.060813467   | 0.0899153       |
| 3720 | ABCA2    | ENSG00000107331 | 9:137019306-137020335:-     | 0.02907226 | 0.101129628   | 0.135249075     |
| 3721 | ABCA2    | ENSG00000107331 | 9:137023052-137024142:-     | 0.03487939 | 0.106003276   | 0.128505767     |
| 3722 | NPDC1    | ENSG00000107281 | 9:137040436-137040513:-     | 3.23E-05   | 0.098196824   | 0.068920197     |
| 3723 | NPDC1    | ENSG00000107281 | 9:137040598-137040670:-     | 0.00058301 | 0.133493223   | 0.099904643     |
| 3724 | NPDC1    | ENSG00000107281 | 9:137040737-137040813:-     | 0.01510949 | 0.096996163   | 0.077529281     |
| 3725 | NPDC1    | ENSG00000107281 | 9:137040984-137041061:-     | 0.00225532 | 0.116955516   | 0.090823291     |
| 3726 | MAN1B1   | ENSG00000177239 | 9:137106315-137106688:+     | 0.00212087 | 0.191095495   | 0.144827784     |
| 3727 | DPP7     | ENSG00000176978 | 9:137112805-137112952:-     | 5.49E-11   | 0.338775671   | 0.193232439     |
| 3728 | DPP7     | ENSG00000176978 | 9:137113287-137113360:-     | 0.00322894 | 0.30213589    | 0.242547106     |
| 3729 | DPP7     | ENSG00000176978 | 9:137114576-137114646:-     | 0.03619499 | 0.494715671   | 0.451788922     |
| 3730 | ANAPC2   | ENSG00000176248 | 9:137175472-137175707:-     | 0.0458847  | 0.140505748   | 0.154172174     |
| 3731 | ANAPC2   | ENSG00000176248 | 9:137180384-137180451:-     | 5.95E-05   | 0.183955507   | 0.116095677     |
| 3732 | ANAPC2   | ENSG00000176248 | 9:137183791-137184912:-     | 0.01822132 | 0.16604535    | 0.130506069     |
| 3733 | ANAPC2   | ENSG00000176248 | 9:137186356-137187480:-     | 0.00285276 | 0.295842207   | 0.352419857     |
| 3734 | SSNA1    | ENSG00000176101 | 9:137188778-137189065:+     | 3.07E-06   | 0.598372122   | 0.487775377     |
| 3735 | TPRN     | ENSG00000176058 | 9:137192691-137198986:-     | 0.02121215 | 0.222981896   | 0.185947935     |
| 3736 | NDOR1    | ENSG00000188566 | 9:137214691-137214797:+     | 0.02118723 | 0.070052027   | 0.083500806     |
| 3737 | NDOR1    | ENSG00000188566 | 9:137215018-137215094:+     | 0.04813247 | 0.455177439   | 0.403812104     |
| 3738 | PNPLA7   | ENSG00000130653 | 9:137462331-137462684:-     | 0.03094701 | 0.2728208     | 0.189781023     |
| 3739 | PNPLA7   | ENSG00000130653 | 9:137462833-137463414:-     | 1.94E-05   | 0.294890898   | 0.165002497     |
| 3740 | ZMYND19  | ENSG00000165724 | 9:137587107-137587716:-     | 0.00894307 | 0.321724756   | 0.278602969     |
| 3741 | ARRDC1   | ENSG00000197070 | 9:137613510-137613614:+     | 4.73E-08   | 0.579854232   | 0.468808597     |
| 3742 | ARRDC1   | ENSG00000197070 | 9:137614214-137614298:+     | 8.26E-08   | 0.47656822    | 0.361768697     |
| 3743 | ARRDC1   | ENSG00000197070 | 9:137614475-137614558:+     | 2.18E-06   | 0.486630927   | 0.386796188     |
| 3744 | EHMT1    | ENSG00000181090 | 9:137814508-137815946:+     | 0.00514254 | 0.420072902   | 0.368017935     |
| 3745 | GTPBP6   | ENSG00000178605 | X:307512-307731:-           | 0.03259025 | 0.147394805   | 0.126587435     |
| 3746 | GTPBP6   | ENSG00000178605 | X:311627-312765:-           | 0.00734364 | 0.528774878   | 0.483288338     |
| 3747 | GTPBP6   | ENSG00000178605 | X:312924-314149:-           | 0.04013662 | 0.114439091   | 0.096668765     |
| 3748 | GTPBP6   | ENSG00000178605 | X:315299-316913:-           | 0.00282784 | 0.149674977   | 0.118006716     |
| 3749 | PPP2R3B  | ENSG00000167393 | X:338710-338777:-           | 0.01504284 | 0.212934571   | 0.170029631     |
| 3750 | ASMTL    | ENSG00000169093 | X:1412854-1417972:-         | 0.00399034 | 0.183263557   | 0.135837561     |
| 3751 | ASMTL    | ENSG00000169093 | X:1418116-1418981:-         | 0.04810316 | 0.178252408   | 0.143528583     |
| 3752 | ASMTL    | ENSG00000169093 | X:1419114-1421657:-         | 0.00285535 | 0.141351465   | 0.102345664     |
| 3753 | OFD1     | ENSG00000046651 | X:13767284-13768053:+       | 2.62E-06   | 0.101020756   | 0.072190267     |
| 3754 | CTPS2    | ENSG00000047230 | X:16589775-16590751:-       | 0.03567332 | 0.120218541   | 0.095110202     |
| 3755 | PHKA2    | ENSG00000044446 | X:18907097-18907899:-       | 0.03156635 | 0.115641985   | 0.091180038     |
| 3756 | MED14    | ENSG00000180182 | X:40651879-40654363:-       | 0.00028591 | 0.193159889   | 0.129087056     |
| 3757 | RGN      | ENSG00000130988 | X:47089991-47091677:+       | 0.00325952 | 0.12693136    | 0.172058806     |
| 3758 | NDUFB11  | ENSG00000147123 | X:47142440-47142583:-       | 0.00088762 | 0.040610744   | 0.030980473     |
| 3759 | RBM10    | ENSG00000182872 | X:47180037-47180211:+       | 0.04437859 | 0.130812068   | 0.104298923     |
| 3760 | UBA1     | ENSG00000130985 | X:47194024-47198802:+       | 0.02016378 | 0.115057289   | 0.152153383     |
| 3761 | CDK16    | ENSG00000102225 | X:47226027-47226278:+       | 5.52E-09   | 0.416201398   | 0.294774948     |
| 3762 | ARAF     | ENSG00000078061 | X:47568894-47568986:+       | 0.00032571 | 0.137186363   | 0.094670246     |



| S/N  | Gene    | Ensembl ID      | Position of retained intron | p-value    | AD_IR_average | Cont_IR_average |
|------|---------|-----------------|-----------------------------|------------|---------------|-----------------|
| 3763 | FTSJ1   | ENSG00000068438 | X:48478518-48478616:+       | 0.02734566 | 0.20138891    | 0.185306838     |
| 3764 | FTSJ1   | ENSG00000068438 | X:48481528-48481631:+       | 0.00033416 | 0.33072228    | 0.269659473     |
| 3765 | FTSJ1   | ENSG00000068438 | X:48481715-48482402:+       | 0.0141897  | 0.172388774   | 0.204092899     |
| 3766 | FTSJ1   | ENSG00000068438 | X:48483027-48485735:+       | 0.0257482  | 0.148221146   | 0.125989844     |
| 3767 | PORCN   | ENSG00000102312 | X:48512507-48512588:+       | 0.02855446 | 0.10573653    | 0.085068468     |
| 3768 | PORCN   | ENSG00000102312 | X:48514365-48514524:+       | 1.72E-06   | 0.185607095   | 0.145400881     |
| 3769 | RBM3    | ENSG00000102317 | X:48576083-48576313:+       | 2.36E-08   | 0.244689006   | 0.263099851     |
| 3770 | RBM3    | ENSG00000102317 | X:48577109-48577464:+       | 1.88E-08   | 0.39009151    | 0.214435587     |
| 3771 | WDR13   | ENSG00000101940 | X:48597614-48597957:+       | 0.00368609 | 0.664162329   | 0.614530714     |
| 3772 | WDR13   | ENSG00000101940 | X:48600626-48601783:+       | 2.31E-09   | 0.14888661    | 0.099630129     |
| 3773 | HDAC6   | ENSG00000094631 | X:48815642-48815883:+       | 0.00031058 | 0.370669      | 0.310687901     |
| 3774 | HDAC6   | ENSG00000094631 | X:48816269-48816464:+       | 0.00038469 | 0.095867545   | 0.069930935     |
| 3775 | HDAC6   | ENSG00000094631 | X:48816633-48817325:+       | 0.01090474 | 0.085478345   | 0.1121768       |
| 3776 | HDAC6   | ENSG00000094631 | X:48817459-48818040:+       | 0.03996325 | 0.106032865   | 0.132629925     |
| 3777 | PQBP1   | ENSG00000102103 | X:48902517-48902731:+       | 0.03225525 | 0.135319106   | 0.154906327     |
| 3778 | TFE3    | ENSG00000068323 | X:49034251-49038009:-       | 0.0015269  | 0.10785286    | 0.092292908     |
| 3779 | WDR45   | ENSG00000196998 | X:49076524-49076644:-       | 7.16E-08   | 0.129485283   | 0.085349832     |
| 3780 | WDR45   | ENSG00000196998 | X:49077747-49077836:-       | 0.01570678 | 0.246317551   | 0.212975578     |
| 3781 | PLP2    | ENSG00000102007 | X:49172096-49173128:+       | 0.00356055 | 0.17309907    | 0.133711334     |
| 3782 | PLP2    | ENSG00000102007 | X:49173281-49173387:+       | 0.03928486 | 0.120141062   | 0.096149978     |
| 3783 | CCDC22  | ENSG00000101997 | X:49237263-49242015:+       | 6.11E-06   | 0.054921056   | 0.087385143     |
| 3784 | CCDC22  | ENSG00000101997 | X:49242148-49242885:+       | 0.00967344 | 0.191212217   | 0.233078348     |
| 3785 | CCDC22  | ENSG00000101997 | X:49246925-49247495:+       | 0.00106648 | 0.212997151   | 0.165424097     |
| 3786 | CCDC22  | ENSG00000101997 | X:49248924-49249166:+       | 0.00017005 | 0.106756487   | 0.07270897      |
| 3787 | CCDC22  | ENSG00000101997 | X:49249262-49249508:+       | 0.00037621 | 0.112235578   | 0.075109846     |
| 3788 | TSPYL2  | ENSG00000184205 | X:53083305-53084544:+       | 0.02817203 | 0.055250473   | 0.045779458     |
| 3789 | TSPYL2  | ENSG00000184205 | X:53084622-53084754:+       | 0.00717065 | 0.246897415   | 0.199768161     |
| 3790 | KDM5C   | ENSG00000126012 | X:53193332-53193436:-       | 0.00026545 | 0.065996124   | 0.085858247     |
| 3791 | IQSEC2  | ENSG00000124313 | X:53248236-53248720:-       | 5.45E-05   | 0.104797863   | 0.068597956     |
| 3792 | FGD1    | ENSG00000102302 | X:54448967-54449142:-       | 0.00157807 | 0.29748978    | 0.238255116     |
| 3793 | FGD1    | ENSG00000102302 | X:54449760-54450270:-       | 0.00302122 | 0.35468378    | 0.298349462     |
| 3794 | MAGED2  | ENSG00000102316 | X:54815690-54815880:+       | 1.45E-05   | 0.300957551   | 0.238875403     |
| 3795 | TRO     | ENSG00000067445 | X:54924733-54924988:+       | 3.54E-06   | 0.110370082   | 0.063849324     |
| 3796 | TRO     | ENSG00000067445 | X:54925068-54925591:+       | 1.63E-06   | 0.129903402   | 0.071989843     |
| 3797 | TRO     | ENSG00000067445 | X:54925683-54926409:+       | 3.61E-07   | 0.147648618   | 0.082319534     |
| 3798 | TRO     | ENSG00000067445 | X:54927105-54927666:+       | 5.28E-05   | 0.09593726    | 0.068322593     |
| 3799 | TRO     | ENSG00000067445 | X:54928710-54930740:+       | 2.66E-08   | 0.69740178    | 0.555221714     |
| 3800 | TRO     | ENSG00000067445 | X:54931031-54931203:+       | 0.00513117 | 0.165502632   | 0.190365797     |
| 3801 | RRAGB   | ENSG00000083750 | X:55757331-55758245:+       | 4.63E-07   | 0.20000034    | 0.128329638     |
| 3802 | ZMYM3   | ENSG00000147130 | X:71242424-71242969:-       | 0.00019184 | 0.190432037   | 0.147207932     |
| 3803 | TAF1    | ENSG00000147133 | X:71460803-71463823:+       | 0.0008538  | 0.083425894   | 0.11613781      |
| 3804 | CSTF2   | ENSG00000101811 | X:100837449-100838238:+     | 0.00871709 | 0.097345323   | 0.132724632     |
| 3805 | BEX4    | ENSG00000102409 | X:103215238-103216148:+     | 4.62E-05   | 0.044481222   | 0.05014503      |
| 3806 | TCEAL9  | ENSG00000185222 | X:103356606-103357614:+     | 0.0357247  | 0.049117232   | 0.054790499     |
| 3807 | MORF4L2 | ENSG00000123562 | X:103685260-103687988:-     | 6.21E-08   | 0.041215934   | 0.034189455     |
| 3808 | TSC22D3 | ENSG00000157514 | X:107715950-107716314:-     | 3.51E-06   | 0.098854299   | 0.107162562     |
| 3809 | THOC2   | ENSG00000125676 | X:123610957-123611439:-     | 0.00082165 | 0.041252913   | 0.031825796     |
| 3810 | SMARCA1 | ENSG00000102038 | X:129447233-129448332:-     | 2.60E-09   | 0.257959817   | 0.163688381     |
| 3811 | FAM127B | ENSG00000203950 | X:135051368-135051916:-     | 0.0139356  | 0.673104427   | 0.632895584     |
| 3812 | PNCK    | ENSG00000130822 | X:153671190-153671284:-     | 0.00513704 | 0.339739366   | 0.263222758     |
| 3813 | SLC6A8  | ENSG00000130821 | X:153688836-153690374:+     | 0.04513086 | 0.121661523   | 0.101538064     |
| 3814 | PLXNB3  | ENSG00000198753 | X:153773016-153773229:+     | 0.00659203 | 0.182031899   | 0.131701233     |
| 3815 | PLXNB3  | ENSG00000198753 | X:153773406-153773517:+     | 0.02345485 | 0.381148993   | 0.317012687     |
| 3816 | PLXNB3  | ENSG00000198753 | X:153774571-153774705:+     | 0.04743076 | 0.116044683   | 0.129028492     |
| 3817 | PLXNB3  | ENSG00000198753 | X:153775660-153775886:+     | 0.03432874 | 0.166961971   | 0.131052618     |
| 3818 | PLXNB3  | ENSG00000198753 | X:153776980-153777207:+     | 0.0055017  | 0.295470909   | 0.227827757     |
| 3819 | PLXNB3  | ENSG00000198753 | X:153777688-153777947:+     | 9.81E-05   | 0.261863732   | 0.202993821     |

| S/N  | Gene   | Ensembl ID      | Position of retained intron | p-value    | AD_IR_average | Cont_IR_average |
|------|--------|-----------------|-----------------------------|------------|---------------|-----------------|
| 3820 | PLXNB3 | ENSG00000198753 | X:153778471-153778599:+     | 8.84E-06   | 0.277296317   | 0.191960186     |
| 3821 | SRPK3  | ENSG00000184343 | X:153784213-153784293:+     | 0.00017812 | 0.456293265   | 0.355235974     |
| 3822 | SRPK3  | ENSG00000184343 | X:153785003-153785080:+     | 0.03249124 | 0.092066855   | 0.122834608     |
| 3823 | PDZD4  | ENSG00000067840 | X:153806840-153807278:-     | 0.01633329 | 0.462306541   | 0.40524884      |
| 3824 | NAA10  | ENSG00000102030 | X:153932115-153932315:-     | 0.03237201 | 0.405056744   | 0.357052701     |
| 3825 | IRAK1  | ENSG00000184216 | X:154016097-154016436:-     | 0.00102974 | 0.11155806    | 0.082915909     |
| 3826 | FLNA   | ENSG00000196924 | X:154351041-154351580:-     | 0.00614319 | 0.595458524   | 0.539563416     |
| 3827 | EMD    | ENSG00000102119 | X:154380019-154380233:+     | 0.03617229 | 0.365734646   | 0.315765558     |
| 3828 | TAZ    | ENSG00000102125 | X:154412214-154413206:+     | 1.86E-07   | 0.572852317   | 0.436713948     |
| 3829 | TAZ    | ENSG00000102125 | X:154413567-154419542:+     | 2.01E-11   | 0.12639105    | 0.199773639     |
| 3830 | TAZ    | ENSG00000102125 | X:154419623-154419704:+     | 0.00021357 | 0.680224768   | 0.719615403     |
| 3831 | TAZ    | ENSG00000102125 | X:154419746-154420031:+     | 0.00037637 | 0.495881524   | 0.549126494     |
| 3832 | FAM3A  | ENSG00000071889 | X:154507329-154507405:-     | 0.03091297 | 0.159639351   | 0.136124656     |
| 3833 | FAM3A  | ENSG00000071889 | X:154515812-154515909:-     | 3.48E-05   | 0.598528988   | 0.683462221     |
