# Supplementary material for: Increased intron retention is a post‐transcriptional signature associated with progressive aging and Alzheimer’s disease
Source: PubMed Central journal article supplement (PMC6516162; doi:10.1111/acel.12928), 2019-03-13
Supplement: ACEL-18-e12928-s009.pdf [file ACEL-18-e12928-s009.pdf]

**Table S8: DAVID functional annotation chart of differential IR genes between Control & AD Frontal Cortex (UOK: SRS373308)**

| <b>GOTERM_BP_DIRECT</b>                                    | <b>Count</b> | <b>%</b> | <b>P-Value</b> | <b>Fold Enrichment</b> | <b>Benjamini value</b> |
|------------------------------------------------------------|--------------|----------|----------------|------------------------|------------------------|
| GO:0006406~mRNA export from nucleus                        | 16           | 2.053915 | 1.84E-05       | 3.789449929            | 0.047715216            |
| GO:0000398~mRNA splicing, via spliceosome                  | 25           | 3.209243 | 2.33E-05       | 2.667124106            | 0.030418952            |
| GO:0016569~covalent chromatin modification                 | 16           | 2.053915 | 7.93E-05       | 3.353495513            | 0.067742598            |
| GO:0030866~cortical actin cytoskeleton organization        | 7            | 0.898588 | 3.86E-04       | 6.907851434            | 0.225838906            |
| GO:0007020~microtubule nucleation                          | 6            | 0.770218 | 7.12E-04       | 7.894687353            | 0.314726949            |
| GO:0043248~proteasome assembly                             | 5            | 0.641849 | 0.001183       | 9.868359191            | 0.407506086            |
| GO:0006281~DNA repair                                      | 21           | 2.695764 | 0.002322       | 2.116448099            | 0.585742021            |
| GO:0046907~intracellular transport                         | 6            | 0.770218 | 0.002863       | 5.921015515            | 0.613727042            |
| GO:0000226~microtubule cytoskeleton organization           | 10           | 1.283697 | 0.002877       | 3.335783389            | 0.572437246            |
| GO:0006338~chromatin remodeling                            | 11           | 1.412067 | 0.003277       | 3.029356775            | 0.581516298            |
| GO:0031124~mRNA 3'-end processing                          | 8            | 1.026958 | 0.004737       | 3.789449929            | 0.681953495            |
| GO:2001184~positive regulation of interleukin-12 secretion | 3            | 0.385109 | 0.005177       | 23.68406206            | 0.682688197            |
| GO:0006418~tRNA aminoacylation for protein translation     | 7            | 0.898588 | 0.006208       | 4.14471086             | 0.719562987            |
| GO:0034063~stress granule assembly                         | 4            | 0.513479 | 0.007171       | 9.473624824            | 0.744430168            |
| GO:0006396~RNA processing                                  | 11           | 1.412067 | 0.007714       | 2.685821471            | 0.745938991            |
| GO:0006887~exocytosis                                      | 10           | 1.283697 | 0.008139       | 2.853501453            | 0.742184208            |
| GO:0032206~positive regulation of telomere maintenance     | 4            | 0.513479 | 0.009554       | 8.612386203            | 0.776581093            |
| GO:0032508~DNA duplex unwinding                            | 7            | 0.898588 | 0.009909       | 3.767918964            | 0.769701865            |
| GO:0006886~intracellular protein transport                 | 19           | 2.439024 | 0.01129        | 1.906767708            | 0.795261457            |
| GO:0006370~7-methylguanosine mRNA capping                  | 6            | 0.770218 | 0.011706       | 4.306193102            | 0.790406351            |

**Table S8: Pathway analysis of differential IR genes between Control & AD Frontal Cortex (UOK: SRS373308)**

| ID                       | Pathway Name                                                                     | #Gene | P-value  | FDR      |
|--------------------------|----------------------------------------------------------------------------------|-------|----------|----------|
| <a href="#">P00015</a>   | Circadian clock system                                                           | 4     | 7.24E-04 | 8.18E-02 |
| <a href="#">P02756</a>   | N-acetylglucosamine metabolism                                                   | 2     | 2.80E-02 | 8.00E-01 |
| <a href="#">hsa04710</a> | Circadian rhythm - Homo sapiens (human)                                          | 7     | 3.89E-04 | 1.18E-01 |
| <a href="#">hsa03015</a> | mRNA surveillance pathway - Homo sapiens (human)                                 | 11    | 2.68E-03 | 2.16E-01 |
| <a href="#">hsa03040</a> | Spliceosome - Homo sapiens (human)                                               | 14    | 2.82E-03 | 2.16E-01 |
| <a href="#">hsa00970</a> | Aminoacyl-tRNA biosynthesis - Homo sapiens (human)                               | 7     | 3.41E-03 | 2.16E-01 |
| <a href="#">hsa04530</a> | Tight junction - Homo sapiens (human)                                            | 14    | 4.22E-03 | 2.16E-01 |
| <a href="#">hsa00563</a> | Glycosylphosphatidylinositol (GPI)-anchor biosynthesis - Homo sapiens (human)    | 5     | 4.76E-03 | 2.16E-01 |
| <a href="#">hsa04961</a> | Endocrine and other factor-regulated calcium reabsorption - Homo sapiens (human) | 7     | 4.99E-03 | 2.16E-01 |
| <a href="#">hsa04120</a> | Ubiquitin mediated proteolysis - Homo sapiens (human)                            | 13    | 9.38E-03 | 3.55E-01 |
| <a href="#">hsa05169</a> | Epstein-Barr virus infection - Homo sapiens (human)                              | 17    | 1.15E-02 | 3.87E-01 |
| <a href="#">hsa04912</a> | GnRH signaling pathway - Homo sapiens (human)                                    | 9     | 2.37E-02 | 6.37E-01 |

| Table S8: Overlap of differential IR genes with curated AD genes (DisGeNET) |         |           |         |          |       |
|-----------------------------------------------------------------------------|---------|-----------|---------|----------|-------|
| ABCA2                                                                       | CLUH    | HARS      | NR4A2   | RENBP    | WASF1 |
| ABCB6                                                                       | COG1    | HGS       | PCBP4   | RPS6KB1  | XRCC1 |
| ACADVL                                                                      | COL11A2 | HLA-B     | PCNT    | RRP1     | ZMYM3 |
| ACO2                                                                        | CRHR1   | HM13      | PDE7A   | SGSM3    |       |
| AKAP9                                                                       | CRTC1   | HMGA1     | PER2    | SHANK3   |       |
| ALS2                                                                        | CSNK1D  | HMGCS1    | PHF1    | SLC25A27 |       |
| APC2                                                                        | CYP27A1 | HNRNPA2B1 | PIK3R1  | SLC25A38 |       |
| APLP1                                                                       | DDX39B  | HTRA2     | PKP4    | SLC30A3  |       |
| ARRB2                                                                       | DGAT1   | IDUA      | PLA2G6  | SPG7     |       |
| ATAT1                                                                       | DLG1    | IKBKB     | PLD2    | SPPL2B   |       |
| BECN1                                                                       | DYSF    | KIDINS220 | PPARD   | SREBF2   |       |
| BIN1                                                                        | EIF2AK2 | L1CAM     | PPP2R2B | SRSF3    |       |
| BRD2                                                                        | EIF2S3  | LAMP2     | PRKRA   | STIM2    |       |
| BRD8                                                                        | ELAC2   | MAPK14    | PRPF31  | STK11    |       |
| BRSK1                                                                       | ETS2    | MAPT      | PSMB8   | SYNJ1    |       |
| CACNA1A                                                                     | FLOT1   | MCOLN1    | PTGDS   | TFEB     |       |
| CALB1                                                                       | GABBR1  | MPHOSPH6  | PTH1R   | TOMM40   |       |
| CD47                                                                        | GCA     | NAE1      | RAF1    | UBR5     |       |
| CDC25B                                                                      | GGA3    | NCAPH2    | RANBP9  | VAMP2    |       |
| CLOCK                                                                       | GOLGA2  | NELFE     | RELN    | VCAN     |       |

**Table S8: Differential IR between Control & AD Frontal Cortex (UOK: SRS373308)**

| S/N | Gene Affected | ENSEMBL_ID      | Position of retained intron | IR ratio AD | IR ratio Control | p-value  |
|-----|---------------|-----------------|-----------------------------|-------------|------------------|----------|
| 1   | AARSD1        | ENSG00000266967 | 17:42955224-42955841:-      | 0.12500004  | 0.019148967      | 0.000143 |
| 2   | AATK          | ENSG00000181409 | 17:81119580-81119935:-      | 0.10114511  | 0.023076977      | 0.013693 |
| 3   | ABCA2         | ENSG00000107331 | 9:137023052-137024142:-     | 0.3750001   | 0.104477761      | 0.032493 |
| 4   | ABCA5         | ENSG00000154265 | 17:69248317-69249904:-      | 0.25000005  | 0.078886376      | 0.004513 |
| 5   | ABCB6         | ENSG00000115657 | 2:219212491-219213007:-     | 0.21465973  | 0.087804941      | 0.029082 |
| 6   | ABCB7         | ENSG00000131269 | X:75073776-75073867:-       | 0.19230779  | 0.023255926      | 0.012837 |
| 7   | ABCE1         | ENSG00000164163 | 4:145120153-145121173:+     | 0.15183251  | 0.048110019      | 0.013762 |
| 8   | ABCE1         | ENSG00000164163 | 4:145121233-145121332:+     | 0.25806458  | 0.050156806      | 0.000865 |
| 9   | ABCE1         | ENSG00000164163 | 4:145121391-145123020:+     | 0.1126761   | 0.043918961      | 0.033881 |
| 10  | ABCF3         | ENSG00000161204 | 3:184186875-184187396:+     | 0.17045462  | 0.050387671      | 0.022563 |
| 11  | ABCF3         | ENSG00000161204 | 3:184187443-184187663:+     | 0.30890058  | 0.103174681      | 0.007937 |
| 12  | ABCF3         | ENSG00000161204 | 3:184187761-184187860:+     | 0.15254243  | 0.055555622      | 0.041692 |
| 13  | ABCF3         | ENSG00000161204 | 3:184189931-184190998:+     | 0.14285719  | 0.056603823      | 0.028056 |
| 14  | ABHD16A       | ENSG00000204427 | 6:31688786-31689014:-       | 0.12595423  | 0.037356356      | 0.003285 |
| 15  | ABTB1         | ENSG00000114626 | 3:127677843-127679984:+     | 0.36290328  | 0.125000091      | 0.008648 |
| 16  | ABTB1         | ENSG00000114626 | 3:127676581-127676966:+     | 0.24542129  | 0.062189105      | 0.000509 |
| 17  | AC007192.4    | ENSG00000268173 | 19:18160969-18161053:+      | 0.10344848  | 0.00934616       | 0.043881 |
| 18  | AC011380.9    | ENSG00000283155 | 5:140562499-140562662:-     | 0.26190487  | 0.069620381      | 0.033298 |
| 19  | ACADVL        | ENSG00000072778 | 17:7220529-7220603:+        | 0.14245017  | 0.071269521      | 0.024632 |
| 20  | ACD           | ENSG00000102977 | 16:67657684-67657761:-      | 0.16296303  | 0.037735919      | 0.011712 |
| 21  | ACD           | ENSG00000102977 | 16:67659613-67659701:-      | 0.1000001   | 0.013958498      | 0.044579 |
| 22  | ACO2          | ENSG00000100412 | 22:41526453-41527287:+      | 0.11407162  | 0.046181193      | 0.001037 |
| 23  | ACOT8         | ENSG00000101473 | 20:45843721-45844262:-      | 0.22279798  | 0.051118267      | 0.001285 |
| 24  | ACOT8         | ENSG00000101473 | 20:45844420-45844449:-      | 0.15492964  | 0.043333394      | 0.012641 |
| 25  | ACSS2         | ENSG00000131069 | 20:34921462-34921543:+      | 0.27840919  | 0.064516244      | 0.015742 |
| 26  | ACSS2         | ENSG00000131069 | 20:34921600-34921785:+      | 0.21031752  | 0.070422617      | 0.027193 |
| 27  | ACTN4         | ENSG00000130402 | 19:38727103-38728315:+      | 0.19565226  | 0.052044702      | 0.022933 |
| 28  | ACTN4         | ENSG00000130402 | 19:38709476-38711275:+      | 0.10443042  | 0.035143818      | 0.026623 |
| 29  | ACTN4         | ENSG00000130402 | 19:38711361-38714468:+      | 0.20394742  | 0.061497384      | 0.004968 |
| 30  | ACTR1B        | ENSG00000115073 | 2:97661946-97663842:-       | 0.43636368  | 0.166666754      | 0.009004 |
| 31  | ACTR1B        | ENSG00000115073 | 2:97656960-97657151:-       | 0.41095894  | 0.107544216      | 0.000304 |
| 32  | ACTR1B        | ENSG00000115073 | 2:97658643-97658878:-       | 0.3573668   | 0.151785779      | 0.005882 |
| 33  | ACTR8         | ENSG00000113812 | 3:53878467-53879938:-       | 0.1052633   | 0.011496321      | 0.03259  |
| 34  | ADAM11        | ENSG00000073670 | 17:44778242-44779221:+      | 0.1818183   | 0.018292769      | 0.006234 |
| 35  | ADAMTSL2      | ENSG00000197859 | 9:133561295-133566935:+     | 0.1363638   | 0.009514201      | 0.010488 |
| 36  | ADCY5         | ENSG00000173175 | 3:123325462-123327617:-     | 0.14666674  | 0.031250082      | 0.01952  |
| 37  | ADD1          | ENSG00000087274 | 4:2926112-2928170:+         | 0.10130721  | 0.034820482      | 0.001802 |
| 38  | ADD1          | ENSG00000087274 | 4:2926675-2928170:+         | 0.18057927  | 0.066536266      | 0.018245 |
| 39  | ADD1          | ENSG00000087274 | 4:2905015-2907742:+         | 0.102289    | 0.054852338      | 0.01103  |
| 40  | ADD1          | ENSG00000087274 | 4:2909431-2914883:+         | 0.26890765  | 0.072847784      | 0.017449 |
| 41  | ADGRB1        | ENSG00000181790 | 8:142522710-142524237:+     | 0.12612626  | 0.009852292      | 0.009304 |
| 42  | ADGRB1        | ENSG00000181790 | 8:142542647-142543402:+     | 0.1010639   | 0.020979076      | 0.014055 |
| 43  | ADGRB1        | ENSG00000181790 | 8:142543438-142543600:+     | 0.15899586  | 0.070621524      | 0.047537 |
| 44  | ADGRE5        | ENSG00000123146 | 19:14408009-14408091:+      | 0.26229522  | 0.033333495      | 0.021811 |
| 45  | ADGRL1        | ENSG00000072071 | 19:14160297-14160592:-      | 0.1274511   | 0.007677191      | 0.006285 |
| 46  | ADGRL1        | ENSG00000072071 | 19:14161626-14162605:-      | 0.10588244  | 0.009682927      | 0.012285 |
| 47  | ADHFE1        | ENSG00000147576 | 8:66456895-66457069:+       | 0.40372678  | 0.105691163      | 0.006216 |
| 48  | ADRM1         | ENSG00000130706 | 20:62306734-62307370:+      | 0.16228075  | 0.050980448      | 0.012546 |

| S/N | Gene Affected | ENSEMBL_ID      | Position of retained intron | IR ratio AD | IR ratio Control | p-value  |
|-----|---------------|-----------------|-----------------------------|-------------|------------------|----------|
| 49  | ADRM1         | ENSG00000130706 | 20:62306320-62306647:+      | 0.116041    | 0.039877344      | 0.017094 |
| 50  | AFMID         | ENSG00000183077 | 17:78191060-78206910:+      | 0.3174604   | 0.105263281      | 0.046434 |
| 51  | AFTPH         | ENSG00000119844 | 2:64581273-64585421:+       | 0.17142863  | 0.053333395      | 0.02016  |
| 52  | AGAP3         | ENSG00000133612 | 7:151118632-151122724:+     | 0.21818194  | 0.044776264      | 0.045686 |
| 53  | AGBL5         | ENSG00000084693 | 2:27058602-27059189:+       | 0.03000009  | 0.142857291      | 0.042738 |
| 54  | AGFG1         | ENSG00000173744 | 2:227550106-227551958:+     | 0.27450989  | 0.034313808      | 0.00179  |
| 55  | AIFM1         | ENSG00000156709 | X:130139871-130140532:-     | 0.12931041  | 0.036809885      | 0.036608 |
| 56  | AKAP9         | ENSG00000127914 | 7:92105763-92107292:+       | 0.11475414  | 0.044444493      | 0.040613 |
| 57  | ALCAM         | ENSG00000170017 | 3:105550259-105552143:+     | 0.16626509  | 0.082352988      | 0.048815 |
| 58  | ALCAM         | ENSG00000170017 | 3:105550259-105552467:+     | 0.22558928  | 0.088607662      | 0.022375 |
| 59  | ALCAM         | ENSG00000170017 | 3:105552182-105552467:+     | 0.12045457  | 0.04186051       | 0.014889 |
| 60  | ALKBH6        | ENSG00000239382 | 19:36011045-36011403:-      | 0.36231889  | 0.147783345      | 0.027019 |
| 61  | ALS2          | ENSG00000003393 | 2:201704218-201704453:-     | 0.03763446  | 0.111111193      | 0.049354 |
| 62  | AMZ2P1        | ENSG00000214174 | 17:64972927-64973241:-      | 0.21495331  | 0.070080911      | 0.002819 |
| 63  | ANAPC2        | ENSG00000176248 | 9:137183791-137184912:-     | 0.21428581  | 0.06611581       | 0.04773  |
| 64  | ANK2          | ENSG00000145362 | 4:113372625-113373089:+     | 0.22302168  | 0.05762723       | 0.025464 |
| 65  | ANKH          | ENSG00000154122 | 5:14711310-14712873:-       | 0.23676883  | 0.058011085      | 3.99E-05 |
| 66  | ANKRA2        | ENSG00000164331 | 5:73552852-73553405:-       | 0.4132232   | 0.182266111      | 0.033916 |
| 67  | ANKRA2        | ENSG00000164331 | 5:73553486-73554321:-       | 0.27956994  | 0.103773659      | 0.015578 |
| 68  | ANKRA2        | ENSG00000164331 | 5:73555585-73557574:-       | 0.40458023  | 0.132867254      | 0.020836 |
| 69  | ANKRD19P      | ENSG00000187984 | 9:92826578-92836776:+       | 0.64705887  | 0.120482107      | 0.006179 |
| 70  | ANKRD28       | ENSG00000206560 | 3:15677056-15677479:-       | 0.1726191   | 0.066225235      | 0.045115 |
| 71  | AP1S2         | ENSG00000182287 | X:15827372-15828191:-       | 0.39790579  | 0.043782884      | 1.79E-07 |
| 72  | AP1S2         | ENSG00000182287 | X:15828200-15845378:-       | 0.10483878  | 0.015473928      | 0.002539 |
| 73  | AP3D1         | ENSG00000065000 | 19:2110896-2111284:-        | 0.12408762  | 0.03801173       | 0.003686 |
| 74  | AP3D1         | ENSG00000065000 | 19:2111332-2111678:-        | 0.16104872  | 0.047619086      | 0.001975 |
| 75  | AP3D1         | ENSG00000065000 | 19:2111828-2112859:-        | 0.22093029  | 0.042016863      | 0.000738 |
| 76  | AP5Z1         | ENSG00000242802 | 7:4781754-4783315:+         | 0.29268307  | 0.060000182      | 0.049241 |
| 77  | APC2          | ENSG00000115266 | 19:1458060-1460180:+        | 0.23021588  | 0.061224555      | 0.004939 |
| 78  | APLP1         | ENSG00000105290 | 19:35877825-35878081:+      | 0.16251361  | 0.052451614      | 0.021665 |
| 79  | APLP1         | ENSG00000105290 | 19:35878108-35878583:+      | 0.10360804  | 0.035550817      | 0.015547 |
| 80  | APOL2         | ENSG00000128335 | 22:36233455-36239440:-      | 0.15723275  | 0.038461579      | 0.001634 |
| 81  | APPBP2        | ENSG00000062725 | 17:60454492-60456295:-      | 0.16580317  | 0.052631651      | 0.027902 |
| 82  | APPBP2        | ENSG00000062725 | 17:60461915-60461993:-      | 0.10588241  | 0.03141367       | 0.034183 |
| 83  | ARFGAP1       | ENSG00000101199 | 20:63276651-63277204:+      | 0.12408767  | 0.02985082       | 0.02981  |
| 84  | ARFGAP1       | ENSG00000101199 | 20:63282851-63283850:+      | 0.74157303  | 0.327272906      | 0.048533 |
| 85  | ARFRP1        | ENSG00000101246 | 20:63700530-63700601:-      | 0.31333341  | 0.091428679      | 0.01659  |
| 86  | ARHGEF4       | ENSG00000136002 | 2:131035288-131038852:+     | 0.19718322  | 0.043478372      | 0.032536 |
| 87  | ARHGEF4       | ENSG00000136002 | 2:131040440-131041229:+     | 0.13747237  | 0.035961359      | 0.029349 |
| 88  | ARHGEF4       | ENSG00000136002 | 2:131045446-131046037:+     | 0.29208931  | 0.085185287      | 0.008119 |
| 89  | ARL2BP        | ENSG00000102931 | 16:57246141-57248536:+      | 0.12647063  | 0.045045087      | 0.012855 |
| 90  | ARMC6         | ENSG00000105676 | 19:19055928-19057415:+      | 0.26415102  | 0.066666759      | 0.011442 |
| 91  | ARMC9         | ENSG00000135931 | 2:231215001-231216637:+     | 0.15151543  | 0.009514224      | 0.023288 |
| 92  | ARMCX2        | ENSG00000184867 | X:101658142-101658460:-     | 0.12048199  | 0.026315852      | 0.014755 |
| 93  | ARRB2         | ENSG00000141480 | 17:4720640-4720945:+        | 0.22597406  | 0.090909133      | 0.004312 |
| 94  | ARRB2         | ENSG00000141480 | 17:4716608-4717216:+        | 0.35947718  | 0.04093574       | 4.67E-05 |
| 95  | ARRB2         | ENSG00000141480 | 17:4717276-4717684:+        | 0.22540987  | 0.05442181       | 0.000213 |
| 96  | ARRB2         | ENSG00000141480 | 17:4718023-4718260:+        | 0.20962202  | 0.052287612      | 3.09E-05 |
| 97  | ARRDC1        | ENSG00000197070 | 9:137614214-137614298:+     | 0.27272736  | 0.086419873      | 0.0439   |

| S/N | Gene Affected | ENSEMBL_ID      | Position of retained intron | IR ratio AD | IR ratio Control | p-value  |
|-----|---------------|-----------------|-----------------------------|-------------|------------------|----------|
| 98  | ASGR1         | ENSG00000141505 | 17:7174067-7174137:-        | 0.23076943  | 0.027397428      | 0.035903 |
| 99  | ASMTL         | ENSG00000169093 | X:1403489-1412731:-         | 0.1081082   | 0.014925439      | 0.013051 |
| 100 | ASPCR1        | ENSG00000169696 | 17:82016869-82016940:+      | 0.23333341  | 0.07746488       | 0.031045 |
| 101 | ATAT1         | ENSG00000137343 | 6:30640422-30642175:+       | 0.40909101  | 0.121621777      | 0.037157 |
| 102 | ATAT1         | ENSG00000137343 | 6:30640603-30642175:+       | 0.35000009  | 0.095744808      | 0.022087 |
| 103 | ATAT1         | ENSG00000137343 | 6:30643011-30643528:+       | 0.56962029  | 0.216049472      | 0.005181 |
| 104 | ATF6B         | ENSG00000213676 | 6:32115968-32116479:-       | 0.39498435  | 0.164948505      | 0.002085 |
| 105 | ATF6B         | ENSG00000213676 | 6:32118866-32118955:-       | 0.38277517  | 0.088235361      | 0.000327 |
| 106 | ATF6B         | ENSG00000213676 | 6:32119957-32120770:-       | 0.33750005  | 0.139664887      | 0.024832 |
| 107 | ATG4B         | ENSG00000168397 | 2:241671405-241672190:+     | 0.57800513  | 0.226415139      | 5.12E-05 |
| 108 | ATG4B         | ENSG00000168397 | 2:241653610-241654545:+     | 0.13870973  | 0.030100385      | 0.003677 |
| 109 | ATG4B         | ENSG00000168397 | 2:241654647-241655270:+     | 0.1651652   | 0.037415004      | 0.000351 |
| 110 | ATL2          | ENSG00000119787 | 2:38296590-38296685:-       | 0.59509207  | 0.140187029      | 0.000958 |
| 111 | ATL2          | ENSG00000119787 | 2:38296700-38298143:-       | 0.59322036  | 0.247311933      | 0.013769 |
| 112 | ATP13A1       | ENSG00000105726 | 19:19647528-19647598:-      | 0.19205305  | 0.035087809      | 0.009518 |
| 113 | ATP13A1       | ENSG00000105726 | 19:19649940-19651688:-      | 0.16666673  | 0.056910651      | 0.049219 |
| 114 | ATP13A4       | ENSG00000127249 | 3:193433917-193435647:-     | 0.13559336  | 0.015805951      | 0.033605 |
| 115 | ATP1B3        | ENSG00000069849 | 3:141922063-141925530:+     | 0.10916585  | 0.037470765      | 0.00974  |
| 116 | ATP8A1        | ENSG00000124406 | 4:42588329-42590810:-       | 0.56910572  | 0.136842202      | 0.000603 |
| 117 | ATP8A1        | ENSG00000124406 | 4:42590884-42600477:-       | 0.25000009  | 0.066265166      | 0.025881 |
| 118 | ATRX          | ENSG00000085224 | X:77520916-77521402:-       | 0.15062766  | 0.036184255      | 0.002111 |
| 119 | AUH           | ENSG00000148090 | 9:91214425-91216058:-       | 0.15677971  | 0.064343229      | 0.04985  |
| 120 | AUP1          | ENSG00000115307 | 2:74528321-74528416:-       | 0.10512132  | 0.042183658      | 0.018731 |
| 121 | AUP1          | ENSG00000115307 | 2:74528935-74529131:-       | 0.63870971  | 0.302816984      | 0.00917  |
| 122 | AUP1          | ENSG00000115307 | 2:74529282-74529361:-       | 0.10136989  | 0.034188077      | 0.019267 |
| 123 | BBS2          | ENSG00000125124 | 16:56499907-56500853:-      | 0.17586915  | 0.078341055      | 0.014385 |
| 124 | BBS2          | ENSG00000125124 | 16:56502456-56502672:-      | 0.30803575  | 0.116216264      | 0.001491 |
| 125 | BBS7          | ENSG00000138686 | 4:121828269-121828401:-     | 0.11445789  | 0.023411416      | 0.004614 |
| 126 | BCAT2         | ENSG00000105552 | 19:48800297-48806516:-      | 0.25600007  | 0.084210624      | 0.031294 |
| 127 | BECN1         | ENSG00000126581 | 17:42818877-42819547:-      | 0.13930352  | 0.044510427      | 0.007906 |
| 128 | BHLHE40       | ENSG00000134107 | 3:4980408-4981391:+         | 0.10027104  | 0.036832448      | 0.015723 |
| 129 | BHLHE40       | ENSG00000134107 | 3:4981515-4982835:+         | 0.10352945  | 0.038610077      | 0.018845 |
| 130 | BIN1          | ENSG00000136717 | 2:127051243-127052254:-     | 0.65200003  | 0.223776293      | 0.000105 |
| 131 | BIN1          | ENSG00000136717 | 2:127052362-127053421:-     | 0.77980134  | 0.274261662      | 1.10E-05 |
| 132 | BIN1          | ENSG00000136717 | 2:127053445-127053904:-     | 0.76237626  | 0.250000052      | 2.32E-06 |
| 133 | BIN1          | ENSG00000136717 | 2:127054012-127057472:-     | 0.7986871   | 0.317120684      | 5.61E-05 |
| 134 | BIN1          | ENSG00000136717 | 2:127057601-127059010:-     | 0.27240146  | 0.081374357      | 4.13E-05 |
| 135 | BIN1          | ENSG00000136717 | 2:127064018-127068162:-     | 0.27272732  | 0.037459327      | 4.12E-06 |
| 136 | BIN1          | ENSG00000136717 | 2:127068255-127068923:-     | 0.16878986  | 0.01048954       | 2.57E-06 |
| 137 | BIN3          | ENSG00000147439 | 8:22624363-22629963:-       | 0.24285724  | 0.068965632      | 0.040745 |
| 138 | BIRC6         | ENSG00000115760 | 2:32478818-32479461:+       | 0.00862224  | 0.136363846      | 0.007569 |
| 139 | BOK           | ENSG00000176720 | 2:241570288-241572296:+     | 0.21604947  | 0.070967832      | 0.033122 |
| 140 | BRD2          | ENSG00000204256 | 6:32976169-32976249:+       | 0.19746841  | 0.058997115      | 0.00833  |
| 141 | BRD8          | ENSG00000112983 | 5:138157267-138159554:-     | 0.15463919  | 0.053333358      | 0.000404 |
| 142 | BRD8          | ENSG00000112983 | 5:138170409-138170831:-     | 0.13551407  | 0.034482813      | 0.009039 |
| 143 | BRSK1         | ENSG00000160469 | 19:55303826-55304049:+      | 0.11446746  | 0.014705914      | 9.92E-05 |
| 144 | BRSK1         | ENSG00000160469 | 19:55304110-55304550:+      | 0.25775197  | 0.04284107       | 3.33E-07 |
| 145 | C17orf49      | ENSG00000258315 | 17:7015156-7015773:+        | 0.19512201  | 0.064102633      | 0.022289 |
| 146 | C17orf49      | ENSG00000258315 | 17:7016685-7016909:+        | 0.10566042  | 0.011661842      | 0.000334 |

| S/N | Gene Affected | ENSEMBL_ID      | Position of retained intron | IR ratio AD | IR ratio Control | p-value  |
|-----|---------------|-----------------|-----------------------------|-------------|------------------|----------|
| 147 | C18orf8       | ENSG00000141452 | 18:23529712-23530027:+      | 0.31770838  | 0.076271246      | 0.000435 |
| 148 | C18orf8       | ENSG00000141452 | 18:23530132-23530228:+      | 0.13468018  | 0.04363641       | 0.011662 |
| 149 | C18orf8       | ENSG00000141452 | 18:23530297-23530386:+      | 0.1482759   | 0.047445301      | 0.007801 |
| 150 | C19orf60      | ENSG0000006015  | 19:18589683-18590853:+      | 0.11111116  | 0.029585841      | 0.007083 |
| 151 | C8orf59       | ENSG00000176731 | 8:85214631-85214920:-       | 0.14092449  | 0.07986505       | 0.048208 |
| 152 | C8orf76       | ENSG00000189376 | 8:123239144-123241229:-     | 0.32432447  | 0.063829978      | 0.04383  |
| 153 | C9orf142      | ENSG00000148362 | 9:136992562-136992639:+     | 0.05806457  | 0.23333343       | 0.003349 |
| 154 | CA11          | ENSG00000063180 | 19:48638144-48638887:-      | 0.1066754   | 0.036665006      | 8.07E-06 |
| 155 | CABYR         | ENSG00000154040 | 18:24139118-24143090:+      | 0.11111132  | 0.010411777      | 0.0371   |
| 156 | CABYR         | ENSG00000154040 | 18:24143259-24143359:+      | 0.12500021  | 0.010820084      | 0.031526 |
| 157 | CACNA1A       | ENSG00000141837 | 19:13332925-13334377:-      | 0.26470606  | 0.042253697      | 0.042638 |
| 158 | CACNA2D1      | ENSG00000153956 | 7:82060527-82064303:-       | 0.10810831  | 0.006648489      | 0.014819 |
| 159 | CALB1         | ENSG00000104327 | 8:90060286-90060628:-       | 0.12500015  | 0.020833424      | 0.040966 |
| 160 | CALB1         | ENSG00000104327 | 8:90063153-90063280:-       | 0.10000012  | 0.0022073        | 0.00023  |
| 161 | CALB1         | ENSG00000104327 | 8:90063320-90063405:-       | 0.11111124  | 0.009345859      | 0.01041  |
| 162 | CALB1         | ENSG00000104327 | 8:90063461-90065897:-       | 0.1714287   | 0.032710345      | 0.016108 |
| 163 | CAMK1         | ENSG00000134072 | 3:9757846-9759487:-         | 0.11333336  | 0.044405003      | 0.010529 |
| 164 | CAMK1         | ENSG00000134072 | 3:9761757-9762913:-         | 0.11522638  | 0.03787883       | 0.015066 |
| 165 | CAMK1         | ENSG00000134072 | 3:9757621-9757728:-         | 0.18965523  | 0.073275921      | 0.031248 |
| 166 | CAMTA2        | ENSG00000108509 | 17:4969337-4969499:-        | 0.12844043  | 0.008695683      | 4.14E-05 |
| 167 | CAMTA2        | ENSG00000108509 | 17:4969520-4969629:-        | 0.1428572   | 0.013725526      | 8.98E-05 |
| 168 | CAMTA2        | ENSG00000108509 | 17:4983043-4985879:-        | 0.15555561  | 0.037037085      | 0.003839 |
| 169 | CARM1         | ENSG00000142453 | 19:10916777-10919594:+      | 0.17757017  | 0.050691324      | 0.026685 |
| 170 | CARM1         | ENSG00000142453 | 19:10919680-10919876:+      | 0.28776985  | 0.103286485      | 0.030816 |
| 171 | CASD1         | ENSG00000127995 | 7:94551478-94552349:+       | 0.13718416  | 0.048223393      | 0.012018 |
| 172 | CASD1         | ENSG00000127995 | 7:94552427-94554482:+       | 0.13114758  | 0.051546434      | 0.02005  |
| 173 | CASKIN2       | ENSG00000177303 | 17:75503527-75503658:-      | 0.18965528  | 0.02631592       | 0.023081 |
| 174 | CBX7          | ENSG00000100307 | 22:39138702-39141370:-      | 0.18257266  | 0.053731394      | 0.004465 |
| 175 | CBX7          | ENSG00000100307 | 22:39134048-39134400:-      | 0.17316023  | 0.017793639      | 0.000109 |
| 176 | CCAR2         | ENSG00000158941 | 8:22619355-22619637:+       | 0.1285141   | 0.031168871      | 0.002634 |
| 177 | CCDC130       | ENSG00000104957 | 19:13759272-13762298:+      | 0.39062505  | 0.186046598      | 0.047257 |
| 178 | CCDC136       | ENSG00000128596 | 7:128805901-128817757:+     | 0.14516136  | 0.019851161      | 0.00079  |
| 179 | CCDC136       | ENSG00000128596 | 7:128817864-128821798:+     | 0.27935227  | 0.083606626      | 0.002471 |
| 180 | CCDC74A       | ENSG00000163040 | 2:131532937-131533012:+     | 0.11111125  | 0.008360968      | 0.012741 |
| 181 | CCHCR1        | ENSG00000204536 | 6:31142716-31142962:-       | 0.47058827  | 0.222222301      | 0.02286  |
| 182 | CCHCR1        | ENSG00000204536 | 6:31144788-31144884:-       | 0.18571442  | 0.01853111       | 0.019902 |
| 183 | CCT6A         | ENSG00000146731 | 7:56061849-56062682:+       | 0.10298106  | 0.038872724      | 0.008251 |
| 184 | CCT8          | ENSG00000156261 | 21:29062243-29062327:-      | 0.10964469  | 0.02600299       | 8.77E-06 |
| 185 | CCT8          | ENSG00000156261 | 21:29062415-29062489:-      | 0.16645492  | 0.037600739      | 2.08E-06 |
| 186 | CD37          | ENSG00000104894 | 19:49337033-49337146:+      | 0.10752702  | 0.012262746      | 0.037233 |
| 187 | CD47          | ENSG00000196776 | 3:108047292-108049618:-     | 0.26145558  | 0.082777131      | 0.012011 |
| 188 | CD47          | ENSG00000196776 | 3:108049651-108050577:-     | 0.23773591  | 0.088815898      | 0.040916 |
| 189 | CD47          | ENSG00000196776 | 3:108050602-108051938:-     | 0.28571434  | 0.105678345      | 0.027838 |
| 190 | CDC25B        | ENSG00000101224 | 20:3801388-3801721:+        | 0.38559327  | 0.169230848      | 0.023017 |
| 191 | CDC27         | ENSG00000004897 | 17:47157124-47157229:-      | 0.13483156  | 0.009265564      | 0.005868 |
| 192 | CDC37         | ENSG00000105401 | 19:10395343-10395434:-      | 0.20125789  | 0.0898438        | 0.009855 |
| 193 | CDK16         | ENSG00000102225 | X:47226027-47226278:+       | 0.18678819  | 0.053701054      | 0.000452 |
| 194 | CDK20         | ENSG00000156345 | 9:87970897-87971146:-       | 0.13333348  | 0.005410044      | 0.002438 |
| 195 | CDK3          | ENSG00000250506 | 17:76001951-76002021:+      | 0.11594218  | 0.011740929      | 0.0299   |

| S/N | Gene Affected | ENSEMBL_ID      | Position of retained intron | IR ratio AD | IR ratio Control | p-value  |
|-----|---------------|-----------------|-----------------------------|-------------|------------------|----------|
| 196 | CEBPZOS       | ENSG00000218739 | 2:37201726-37201862:+       | 0.75463919  | 0.402535805      | 0.044372 |
| 197 | CENPT         | ENSG00000102901 | 16:67828390-67828473:-      | 0.11834324  | 0.02127664       | 0.002084 |
| 198 | CENPT         | ENSG00000102901 | 16:67828843-67829422:-      | 0.10119051  | 0.039711237      | 0.041872 |
| 199 | CEP41         | ENSG00000106477 | 7:130400821-130401880:-     | 0.11627927  | 0.010820077      | 0.032321 |
| 200 | CERS4         | ENSG00000090661 | 19:8255879-8256235:+        | 0.27635333  | 0.115577967      | 0.030221 |
| 201 | CERS4         | ENSG00000090661 | 19:8257985-8261687:+        | 0.13942312  | 0.028985553      | 0.001801 |
| 202 | CES2          | ENSG00000172831 | 16:66941848-66942104:+      | 0.1125001   | 0.025157311      | 0.044048 |
| 203 | CHD3          | ENSG00000170004 | 17:7909338-7910427:+        | 0.30303037  | 0.107296239      | 0.025586 |
| 204 | CHERP         | ENSG00000085872 | 19:16519352-16519620:-      | 0.32624119  | 0.087591322      | 0.004129 |
| 205 | CIAPIN1       | ENSG00000005194 | 16:57430339-57431150:-      | 0.11643841  | 0.029316007      | 0.009972 |
| 206 | CIRBP         | ENSG00000099622 | 19:1271467-1271550:+        | 0.15384633  | 0.006416565      | 0.003532 |
| 207 | CLASP2        | ENSG00000163539 | 3:33573354-33574472:-       | 0.46913584  | 0.107883957      | 0.005801 |
| 208 | CLASP2        | ENSG00000163539 | 3:33574496-33576168:-       | 0.32307699  | 0.069958962      | 0.008914 |
| 209 | CLASRP        | ENSG00000104859 | 19:45052892-45053097:+      | 0.28846161  | 0.086419836      | 0.009165 |
| 210 | CLASRP        | ENSG00000104859 | 19:45057898-45059267:+      | 0.10869571  | 0.023668703      | 0.019033 |
| 211 | CLCN2         | ENSG00000114859 | 3:184352331-184352442:-     | 0.19587642  | 0.024995438      | 0.035473 |
| 212 | CLIP4         | ENSG00000115295 | 2:29115665-29121373:+       | 0.12500024  | 0.012262754      | 0.043672 |
| 213 | CLOCK         | ENSG00000134852 | 4:55450232-55453053:-       | 0.1538464   | 0.012262751      | 0.025948 |
| 214 | CLTA          | ENSG00000122705 | 9:36209320-36210624:+       | 0.10385763  | 0.013847713      | 0.000724 |
| 215 | CLTA          | ENSG00000122705 | 9:36209320-36211602:+       | 0.12996395  | 0.01985115       | 0.000149 |
| 216 | CLTC          | ENSG00000141367 | 17:59687021-59690635:+      | 0.13104841  | 0.056748498      | 0.011424 |
| 217 | CLUH          | ENSG00000132361 | 17:2690777-2691608:-        | 0.16766472  | 0.04926114       | 0.010068 |
| 218 | CLUH          | ENSG00000132361 | 17:2695526-2696158:-        | 0.24096395  | 0.070000113      | 0.039711 |
| 219 | CMC2          | ENSG00000103121 | 16:80997429-80998284:-      | 0.05244762  | 0.218935123      | 0.014867 |
| 220 | CNOT11        | ENSG00000158435 | 2:101266879-101269039:+     | 0.10655742  | 0.040000051      | 0.046326 |
| 221 | CNOT11        | ENSG00000158435 | 2:101269136-101269215:+     | 0.45977015  | 0.200819748      | 0.009732 |
| 222 | CNOT3         | ENSG00000088038 | 19:54146657-54148147:+      | 0.18292696  | 0.016535457      | 0.015651 |
| 223 | CNTNAP1       | ENSG00000108797 | 17:42685420-42685956:+      | 0.19607858  | 0.013333426      | 0.00596  |
| 224 | CNTNAP1       | ENSG00000108797 | 17:42691991-42692498:+      | 0.16000007  | 0.040000072      | 0.014277 |
| 225 | CNTNAP1       | ENSG00000108797 | 17:42697367-42697553:+      | 0.12949649  | 0.035598791      | 0.03802  |
| 226 | CNTRL         | ENSG00000119397 | 9:121161971-121162053:+     | 0.0095142   | 0.100000263      | 0.037866 |
| 227 | COG1          | ENSG00000166685 | 17:73205680-73206153:+      | 0.10924376  | 0.03455729       | 0.029451 |
| 228 | COG1          | ENSG00000166685 | 17:73196751-73196899:+      | 0.1190478   | 0.012213706      | 0.039825 |
| 229 | COG1          | ENSG00000166685 | 17:73197081-73197225:+      | 0.1040001   | 0.016736473      | 0.021898 |
| 230 | COL11A2       | ENSG00000204248 | 6:33163818-33164266:-       | 0.25531948  | 0.022992653      | 0.037836 |
| 231 | COLGALT1      | ENSG00000130309 | 19:17579609-17580698:+      | 0.72774873  | 0.345679115      | 0.027363 |
| 232 | COPS7B        | ENSG00000144524 | 2:231786538-231788554:+     | 0.13157915  | 0.013459113      | 0.038409 |
| 233 | COPS7B        | ENSG00000144524 | 2:231788732-231791732:+     | 0.20645167  | 0.079754674      | 0.038557 |
| 234 | CPNE1         | ENSG00000214078 | 20:35627413-35630438:-      | 0.37686571  | 0.191489436      | 0.034757 |
| 235 | CPNE1         | ENSG00000214078 | 20:35632025-35632162:-      | 0.10256415  | 0.01865676       | 0.003731 |
| 236 | CPNE2         | ENSG00000140848 | 16:57146321-57147550:+      | 0.12396697  | 0.048583039      | 0.022246 |
| 237 | CPNE7         | ENSG00000178773 | 16:89595603-89596483:+      | 0.21428593  | 0.027777939      | 0.045811 |
| 238 | CPSF1         | ENSG00000071894 | 8:144394038-144394112:-     | 0.29611656  | 0.104046324      | 0.01477  |
| 239 | CPSF1         | ENSG00000071894 | 8:144395182-144395264:-     | 0.1300449   | 0.01834868       | 0.002854 |
| 240 | CPSF1         | ENSG00000071894 | 8:144394160-144394233:-     | 0.24778766  | 0.073891689      | 0.004693 |
| 241 | CPSF3         | ENSG00000119203 | 2:9467776-9471342:+         | 0.10714291  | 0.034632086      | 0.033652 |
| 242 | CPT1C         | ENSG00000169169 | 19:49697465-49700683:+      | 0.23076937  | 0.030000121      | 0.014383 |
| 243 | CPT1C         | ENSG00000169169 | 19:49705114-49705213:+      | 0.54545461  | 0.177914278      | 0.024495 |
| 244 | CPT1C         | ENSG00000169169 | 19:49710857-49711808:+      | 0.43715853  | 0.154166791      | 0.018677 |

| S/N | Gene Affected | ENSEMBL_ID      | Position of retained intron | IR ratio AD | IR ratio Control | p-value  |
|-----|---------------|-----------------|-----------------------------|-------------|------------------|----------|
| 245 | CRELD1        | ENSG00000163703 | 3:9942896-9943076:+         | 0.12292363  | 0.032258101      | 0.002487 |
| 246 | CRELD1        | ENSG00000163703 | 3:9943515-9944364:+         | 0.38381204  | 0.132107088      | 0.000941 |
| 247 | CRHR1         | ENSG00000120088 | 17:45833849-45834006:+      | 0.25000031  | 0.018531174      | 0.043515 |
| 248 | CRTC1         | ENSG00000105662 | 19:18768793-18771441:+      | 0.16190484  | 0.046783705      | 0.034006 |
| 249 | CRTC1         | ENSG00000105662 | 19:18771546-18774899:+      | 0.20879129  | 0.025510272      | 0.0014   |
| 250 | CRYBG3        | ENSG00000080200 | 3:97942443-97943225:+       | 0.16438362  | 0.480874512      | 0.009274 |
| 251 | CSNK1D        | ENSG00000141551 | 17:82246039-82248874:-      | 0.23577243  | 0.076923167      | 0.028193 |
| 252 | CSNK1E        | ENSG00000213923 | 22:38293319-38294108:-      | 0.17848413  | 0.057086646      | 0.000475 |
| 253 | CSNK2B        | ENSG00000204435 | 6:31669172-31669318:+       | 0.12701423  | 0.058823546      | 0.000907 |
| 254 | CSPG5         | ENSG00000114646 | 3:47562761-47569070:-       | 0.14074078  | 0.059459503      | 0.027151 |
| 255 | CTBP1         | ENSG00000159692 | 4:1241519-1248915:-         | 0.55371905  | 0.24683556       | 0.03317  |
| 256 | CTNNA1        | ENSG00000044115 | 5:138930935-138932577:+     | 0.1137539   | 0.042465776      | 0.001142 |
| 257 | CTU2          | ENSG00000174177 | 16:88714926-88715047:+      | 0.15476201  | 0.023809644      | 0.033928 |
| 258 | CUL7          | ENSG00000044090 | 6:43038692-43038841:-       | 0.34920646  | 0.092105412      | 0.033711 |
| 259 | CUL9          | ENSG00000112659 | 6:43221321-43221684:+       | 0.24615394  | 0.077519492      | 0.041579 |
| 260 | CWC22         | ENSG00000163510 | 2:179970856-179970940:-     | 0.1123597   | 0.008115062      | 0.013744 |
| 261 | CYP27A1       | ENSG00000135929 | 2:218814187-218814379:+     | 0.10126586  | 0.034482807      | 0.027551 |
| 262 | D2HGDH        | ENSG00000180902 | 2:241756014-241767709:+     | 0.11224499  | 0.010537304      | 0.014288 |
| 263 | DAZAP1        | ENSG00000071626 | 19:1422396-1425877:+        | 0.33181823  | 0.130044919      | 0.013579 |
| 264 | DAZAP1        | ENSG00000071626 | 19:1425960-1428841:+        | 0.53358212  | 0.226337511      | 0.002223 |
| 265 | DCTN1         | ENSG00000204843 | 2:74374340-74376741:-       | 0.12962976  | 0.020362086      | 0.026582 |
| 266 | DDX1          | ENSG00000079785 | 2:15628517-15628637:+       | 0.15199039  | 0.039580005      | 0.000468 |
| 267 | DDX39B        | ENSG00000198563 | 6:31532911-31535366:-       | 0.51197265  | 0.295560784      | 0.001812 |
| 268 | DDX3X         | ENSG00000215301 | X:41341616-41342494:+       | 0.13991772  | 0.065810622      | 0.009548 |
| 269 | DDX52         | ENSG00000278053 | 17:37620948-37621126:-      | 0.16853942  | 0.037037152      | 0.041171 |
| 270 | DEF8          | ENSG00000140995 | 16:89962125-89963362:+      | 0.52150548  | 0.157232874      | 0.023446 |
| 271 | DENND6B       | ENSG00000205593 | 22:50318889-50318964:-      | 0.11538478  | 0.009951913      | 0.025861 |
| 272 | DGAT1         | ENSG00000185000 | 8:144317445-144317543:-     | 0.16517862  | 0.07083339       | 0.044095 |
| 273 | DGCR6         | ENSG00000183628 | 22:18910272-18910887:+      | 0.30769236  | 0.138888977      | 0.044046 |
| 274 | DGKQ          | ENSG00000145214 | 4:960721-961048:-           | 0.32653075  | 0.074074258      | 0.048406 |
| 275 | DGKQ          | ENSG00000145214 | 4:962920-963138:-           | 0.10810834  | 0.00823619       | 0.030443 |
| 276 | DGKQ          | ENSG00000145214 | 4:966527-966747:-           | 0.14285738  | 0.011036489      | 0.027911 |
| 277 | DGKQ          | ENSG00000145214 | 4:967649-967727:-           | 0.34782645  | 0.014914198      | 0.015541 |
| 278 | DGUOK         | ENSG00000114956 | 2:73950732-73958145:+       | 0.19354846  | 0.058823608      | 0.027911 |
| 279 | DGUOK         | ENSG00000114956 | 2:73957240-73958145:+       | 0.11744971  | 0.04699744       | 0.043826 |
| 280 | DHX30         | ENSG00000132153 | 3:47847956-47848179:+       | 0.13654624  | 0.042424296      | 0.015694 |
| 281 | DHX38         | ENSG00000140829 | 16:72097009-72097676:+      | 0.18656722  | 0.058823614      | 0.03354  |
| 282 | DHX8          | ENSG00000067596 | 17:43492292-43492680:+      | 0.10204101  | 0.010820078      | 0.044827 |
| 283 | DLG1          | ENSG00000075711 | 3:197066754-197068501:-     | 0.37500005  | 0.063545233      | 0.000391 |
| 284 | DLG1          | ENSG00000075711 | 3:197068537-197069218:-     | 0.40196085  | 0.094527479      | 0.005424 |
| 285 | DLG1          | ENSG00000075711 | 3:197069260-197075836:-     | 0.15743445  | 0.050666722      | 0.012049 |
| 286 | DLGAP4        | ENSG00000080845 | 20:36497066-36499241:+      | 0.28378387  | 0.059259354      | 0.006928 |
| 287 | DMTF1         | ENSG00000135164 | 7:87174669-87179544:+       | 0.10671941  | 0.040000051      | 0.045024 |
| 288 | DMTF1         | ENSG00000135164 | 7:87179702-87181308:+       | 0.20338988  | 0.085227342      | 0.042676 |
| 289 | DNAJB11       | ENSG00000090520 | 3:186577800-186581370:+     | 0.18974363  | 0.083743899      | 0.040359 |
| 290 | DNAJC2        | ENSG00000105821 | 7:103319678-103319755:-     | 0.20329681  | 0.042780843      | 0.013841 |
| 291 | DNAJC2        | ENSG00000105821 | 7:103322632-103322702:-     | 0.41361268  | 0.126213776      | 0.041717 |
| 292 | DOCK3         | ENSG00000088538 | 3:51275206-51277607:+       | 0.48051953  | 0.064102665      | 0.000351 |
| 293 | DOCK3         | ENSG00000088538 | 3:51277754-51280105:+       | 0.55932207  | 0.05384626       | 0.000146 |

| S/N | Gene Affected | ENSEMBL_ID      | Position of retained intron | IR ratio AD | IR ratio Control | p-value  |
|-----|---------------|-----------------|-----------------------------|-------------|------------------|----------|
| 294 | DOCK3         | ENSG00000088538 | 3:51333027-51333157:+       | 0.13793117  | 0.025862175      | 0.047971 |
| 295 | DOCK4         | ENSG00000128512 | 7:111732287-111736916:-     | 0.57894739  | 0.104762079      | 0.007257 |
| 296 | DPH1          | ENSG00000108963 | 17:2036956-2039754:+        | 0.42748096  | 0.182353037      | 0.026992 |
| 297 | DPH1          | ENSG00000108963 | 17:2036091-2036528:+        | 0.26168232  | 0.025477781      | 0.000471 |
| 298 | DPH7          | ENSG00000148399 | 9:137576167-137576308:-     | 0.00935297  | 0.153846688      | 0.037864 |
| 299 | DPM1          | ENSG00000000419 | 20:50945762-50945846:-      | 0.14189193  | 0.043269271      | 0.00428  |
| 300 | DPM2          | ENSG00000136908 | 9:127936655-127937433:-     | 0.46315792  | 0.232758694      | 0.02338  |
| 301 | DPP7          | ENSG00000176978 | 9:137112805-137112952:-     | 0.17658355  | 0.05016728       | 0.004297 |
| 302 | DPP7          | ENSG00000176978 | 9:137113287-137113360:-     | 0.26148413  | 0.107476686      | 0.006419 |
| 303 | DPY19L4       | ENSG00000156162 | 8:94788052-94789745:+       | 0.20833339  | 0.066666773      | 0.04643  |
| 304 | DRG2          | ENSG00000108591 | 17:18099077-18099632:+      | 0.26744194  | 0.057377144      | 0.008294 |
| 305 | DROSHA        | ENSG00000113360 | 5:31466281-31467938:-       | 0.19000007  | 0.060606141      | 0.034495 |
| 306 | DST           | ENSG00000151914 | 6:56460254-56463564:-       | 0.24257431  | 0.053164615      | 0.000718 |
| 307 | DTNB          | ENSG00000138101 | 2:25383889-25388201:-       | 0.20588251  | 0.030612364      | 0.025832 |
| 308 | DUS1L         | ENSG00000169718 | 17:82060093-82060700:-      | 0.15254241  | 0.040178618      | 0.003716 |
| 309 | DUSP1         | ENSG00000120129 | 5:172769132-172769574:-     | 0.1461149   | 0.068493191      | 0.027392 |
| 310 | DUSP1         | ENSG00000120129 | 5:172770306-172770585:-     | 0.20055714  | 0.063953543      | 0.005474 |
| 311 | DUSP11        | ENSG00000144048 | 2:73762859-73766417:-       | 0.21052637  | 0.075949432      | 0.02269  |
| 312 | DYNC1I2       | ENSG00000077380 | 2:171692894-171707232:+     | 0.02614387  | 0.142857346      | 0.035778 |
| 313 | DYSF          | ENSG00000135636 | 2:71674296-71679056:+       | 0.1008265   | 0.033033087      | 0.034881 |
| 314 | E2F4          | ENSG00000205250 | 16:67194980-67195781:+      | 0.2131148   | 0.087248391      | 0.037313 |
| 315 | E2F4          | ENSG00000205250 | 16:67197646-67197866:+      | 0.30985921  | 0.093896781      | 0.002756 |
| 316 | EDC4          | ENSG00000038358 | 16:67877845-67878165:+      | 0.2580646   | 0.04504514       | 0.005421 |
| 317 | EDC4          | ENSG00000038358 | 16:67880216-67880556:+      | 0.21848748  | 0.063829894      | 0.038204 |
| 318 | EDC4          | ENSG00000038358 | 16:67881417-67881496:+      | 0.29054061  | 0.06962034       | 0.005296 |
| 319 | EDC4          | ENSG00000038358 | 16:67881533-67881667:+      | 0.24870471  | 0.052287645      | 0.001091 |
| 320 | EDC4          | ENSG00000038358 | 16:67883731-67883955:+      | 0.29186606  | 0.097826139      | 0.001818 |
| 321 | EFR3B         | ENSG00000084710 | 2:25128332-25129974:+       | 0.10638313  | 0.006897798      | 0.008757 |
| 322 | EGFL7         | ENSG00000172889 | 9:136669721-136669913:+     | 0.23232331  | 0.051903195      | 0.005458 |
| 323 | EGFL7         | ENSG00000172889 | 9:136671014-136671925:+     | 0.31524016  | 0.106576063      | 0.01444  |
| 324 | EGLN2         | ENSG00000269858 | 19:40801415-40806554:+      | 0.17410718  | 0.074204993      | 0.022747 |
| 325 | EHMT2         | ENSG00000204371 | 6:31884559-31884644:-       | 0.14070357  | 0.026738024      | 0.004091 |
| 326 | EIF2AK2       | ENSG00000055332 | 2:37107395-37107473:-       | 0.10000011  | 0.005463605      | 0.003751 |
| 327 | EIF2S3        | ENSG00000130741 | X:24073263-24076721:+       | 0.234139    | 0.093922685      | 0.000698 |
| 328 | EIF3G         | ENSG00000130811 | 19:10116074-10116799:-      | 0.16206265  | 0.042283337      | 0.000751 |
| 329 | EIF4E2        | ENSG00000135930 | 2:232574341-232580903:+     | 0.20967755  | 0.046153967      | 0.036911 |
| 330 | EIF5A         | ENSG00000132507 | 17:7308113-7309614:+        | 0.25000027  | 0.014149332      | 0.012869 |
| 331 | EIF5A         | ENSG00000132507 | 17:7309800-7311017:+        | 0.11495179  | 0.016412678      | 1.05E-07 |
| 332 | ELAC2         | ENSG00000006744 | 17:12994884-12994962:-      | 0.12149537  | 0.039215732      | 0.016313 |
| 333 | ELP2          | ENSG00000134759 | 18:36164667-36167100:+      | 0.18473899  | 0.080971702      | 0.016982 |
| 334 | ELP2          | ENSG00000134759 | 18:36170196-36171046:+      | 0.14912285  | 0.030651384      | 0.001099 |
| 335 | EML2          | ENSG00000125746 | 19:45619191-45621206:-      | 0.1193549   | 0.038461598      | 0.031763 |
| 336 | ENDOG         | ENSG00000167136 | 9:128820848-128822327:+     | 0.34365327  | 0.171296342      | 0.007878 |
| 337 | ENTPD4        | ENSG00000197217 | 8:23434478-23435391:-       | 0.12142863  | 0.030927892      | 0.017295 |
| 338 | EPB41L2       | ENSG00000079819 | 6:130880489-130880600:-     | 0.1298703   | 0.011560789      | 0.021431 |
| 339 | EPB41L3       | ENSG00000082397 | 18:5394793-5395066:-        | 0.1253688   | 0.027983596      | 0.00588  |
| 340 | EPHX2         | ENSG00000120915 | 8:27543829-27544185:+       | 0.32352948  | 0.056179877      | 0.003168 |
| 341 | EPHX2         | ENSG00000120915 | 8:27544244-27544443:+       | 0.50961549  | 0.149253892      | 0.02577  |
| 342 | EPN2          | ENSG00000072134 | 17:19332068-19333955:+      | 0.27044028  | 0.114832584      | 0.007343 |

| S/N | Gene Affected | ENSEMBL_ID      | Position of retained intron | IR ratio AD | IR ratio Control | p-value  |
|-----|---------------|-----------------|-----------------------------|-------------|------------------|----------|
| 343 | ERCC3         | ENSG00000163161 | 2:127289501-127289688:-     | 0.21559637  | 0.063025261      | 0.002467 |
| 344 | ERF           | ENSG00000105722 | 19:42249942-42250330:-      | 0.32558146  | 0.109091002      | 0.016608 |
| 345 | ERGIC3        | ENSG00000125991 | 20:35554386-35555043:+      | 0.10599085  | 0.023297541      | 0.009145 |
| 346 | ETS2          | ENSG00000157557 | 21:38806120-38810034:+      | 0.18253978  | 0.040697764      | 0.018305 |
| 347 | EVI2A         | ENSG00000126860 | 17:31319023-31320372:-      | 0.34883744  | 0.036788167      | 0.030292 |
| 348 | EWSR1         | ENSG00000182944 | 22:29291599-29292136:+      | 0.42974362  | 0.191907588      | 0.005989 |
| 349 | EXOC3         | ENSG00000180104 | 5:459459-461959:+           | 0.11111115  | 0.050377873      | 0.048199 |
| 350 | EXOC6B        | ENSG00000144036 | 2:72179461-72184074:-       | 0.20000011  | 0.048780581      | 0.033376 |
| 351 | EXOC7         | ENSG00000182473 | 17:76088122-76088463:-      | 0.17085433  | 0.058823595      | 0.024802 |
| 352 | EXOC7         | ENSG00000182473 | 17:76091235-76094413:-      | 0.26771661  | 0.086363744      | 0.030915 |
| 353 | EXOSC9        | ENSG00000123737 | 4:121813380-121813865:+     | 0.10775868  | 0.020408212      | 0.005649 |
| 354 | EZH1          | ENSG00000108799 | 17:42702961-42703739:-      | 0.66124663  | 0.303977338      | 0.001691 |
| 355 | FAM102A       | ENSG00000167106 | 9:127944898-127945366:-     | 0.10422539  | 0.04150948       | 0.043617 |
| 356 | FAM120B       | ENSG00000112584 | 6:170391121-170395486:+     | 0.39247316  | 0.134199203      | 0.002528 |
| 357 | FAM133B       | ENSG00000234545 | 7:92577717-92578149:-       | 0.26291084  | 0.085106444      | 0.004763 |
| 358 | FAM13B        | ENSG0000031003  | 5:137945997-137946227:-     | 0.30645172  | 0.087805009      | 0.027809 |
| 359 | FAM149A       | ENSG00000109794 | 4:186167262-186171913:+     | 0.14285727  | 0.02272736       | 0.025027 |
| 360 | FAM184A       | ENSG00000111879 | 6:118966952-118975023:-     | 0.12903245  | 0.01709412       | 0.046203 |
| 361 | FAM3A         | ENSG00000071889 | X:154507861-154508288:-     | 0.17647065  | 0.062992202      | 0.04375  |
| 362 | FAM91A1       | ENSG00000176853 | 8:123810351-123812518:+     | 0.35398236  | 0.113207639      | 0.011661 |
| 363 | FAM92A        | ENSG00000188343 | 8:93708016-93709770:+       | 0.10884363  | 0.020080393      | 0.022922 |
| 364 | FAM98C        | ENSG00000130244 | 19:38405421-38405518:+      | 0.1626017   | 0.053892293      | 0.045124 |
| 365 | FAM98C        | ENSG00000130244 | 19:38405635-38406909:+      | 0.25000005  | 0.113537183      | 0.042891 |
| 366 | FAM98C        | ENSG00000130244 | 19:38407077-38408750:+      | 0.27567571  | 0.133333396      | 0.037891 |
| 367 | FARP2         | ENSG00000006607 | 2:241484331-241489961:+     | 0.55319156  | 0.169491701      | 0.035389 |
| 368 | FASTK         | ENSG00000164896 | 7:151079021-151079499:-     | 0.39784952  | 0.158536678      | 0.016408 |
| 369 | FBXO11        | ENSG00000138081 | 2:47834711-47834787:-       | 0.13300502  | 0.008264521      | 0.002151 |
| 370 | FBXO11        | ENSG00000138081 | 2:47808247-47808328:-       | 0.10050253  | 0.031161495      | 0.000616 |
| 371 | FBXO9         | ENSG00000112146 | 6:53092824-53093465:+       | 0.36533962  | 0.130307547      | 0.003596 |
| 372 | FCHSD1        | ENSG00000197948 | 5:141644690-141644858:-     | 0.12857155  | 0.435897674      | 0.043432 |
| 373 | FHOD1         | ENSG00000135723 | 16:67229718-67229792:-      | 0.35897453  | 0.06451632       | 0.030138 |
| 374 | FIP1L1        | ENSG00000145216 | 4:53440608-53442652:+       | 0.27044031  | 0.097222303      | 0.019452 |
| 375 | FLCN          | ENSG00000154803 | 17:17215316-17216379:-      | 0.43783789  | 0.139072931      | 0.003389 |
| 376 | FLCN          | ENSG00000154803 | 17:17216503-17217068:-      | 0.3221477   | 0.094488267      | 0.005283 |
| 377 | FLII          | ENSG00000177731 | 17:18253458-18253543:-      | 0.19879523  | 0.080645234      | 0.045488 |
| 378 | FLOT1         | ENSG00000137312 | 6:30741333-30741613:-       | 0.12804881  | 0.056562771      | 0.024619 |
| 379 | FMNL1         | ENSG00000184922 | 17:45244025-45244175:+      | 0.17142865  | 0.014285792      | 0.003136 |
| 380 | FMNL1         | ENSG00000184922 | 17:45246604-45246866:+      | 0.33333341  | 0.051282143      | 0.00156  |
| 381 | FMNL2         | ENSG00000157827 | 2:152643544-152647795:+     | 0.70370374  | 0.258620822      | 0.013031 |
| 382 | FMNL2         | ENSG00000157827 | 2:152619718-152622536:+     | 0.357143    | 0.038461712      | 0.015408 |
| 383 | FMNL2         | ENSG00000157827 | 2:152622557-152625437:+     | 0.30303046  | 0.027027177      | 0.012458 |
| 384 | FMNL2         | ENSG00000157827 | 2:152640914-152643418:+     | 0.31730778  | 0.081761127      | 0.017155 |
| 385 | FSD1          | ENSG00000105255 | 19:4318951-4322985:+        | 0.14843755  | 0.052631632      | 0.028434 |
| 386 | FSD1          | ENSG00000105255 | 19:4310596-4311841:+        | 0.42857147  | 0.173010474      | 0.014015 |
| 387 | FTSJ1         | ENSG00000068438 | X:48478168-48478448:+       | 0.2253522   | 0.062500115      | 0.04225  |
| 388 | G6PD          | ENSG00000160211 | X:154534496-154535167:-     | 0.10144935  | 0.021739198      | 0.029357 |
| 389 | GAB1          | ENSG00000109458 | 4:143433716-143437998:+     | 0.21028045  | 0.06185577       | 0.032472 |
| 390 | GAB1          | ENSG00000109458 | 4:143438600-143439801:+     | 0.22614848  | 0.0471699        | 0.007244 |
| 391 | GABBR1        | ENSG00000204681 | 6:29627646-29629086:-       | 0.41333339  | 0.083333487      | 0.009666 |

| S/N | Gene Affected | ENSEMBL_ID      | Position of retained intron | IR ratio AD | IR ratio Control | p-value  |
|-----|---------------|-----------------|-----------------------------|-------------|------------------|----------|
| 392 | GABBR1        | ENSG00000204681 | 6:29629107-29630457:-       | 0.82995952  | 0.351449373      | 0.003008 |
| 393 | GABBR1        | ENSG00000204681 | 6:29630643-29631395:-       | 0.12571434  | 0.037500062      | 0.027073 |
| 394 | GALT          | ENSG00000213930 | 9:34649564-34650368:+       | 0.12751686  | 0.035175958      | 0.043061 |
| 395 | GARS          | ENSG00000106105 | 7:30631541-30632246:+       | 0.14983716  | 0.038602969      | 7.94E-05 |
| 396 | GATB          | ENSG00000059691 | 4:151701518-151703850:-     | 0.11347523  | 0.017910484      | 0.001123 |
| 397 | GBA2          | ENSG00000070610 | 9:35740362-35740525:-       | 0.36018961  | 0.128630762      | 0.001805 |
| 398 | GBA2          | ENSG00000070610 | 9:35741890-35744296:-       | 0.25116283  | 0.118421114      | 0.03574  |
| 399 | GCA           | ENSG00000115271 | 2:162344275-162347577:+     | 0.24812037  | 0.090277871      | 0.040061 |
| 400 | GCAT          | ENSG00000100116 | 22:37815280-37815417:+      | 0.13084119  | 0.030674914      | 0.020906 |
| 401 | GCC2          | ENSG00000135968 | 2:108486648-108487698:+     | 0.1153847   | 0.010869629      | 0.006406 |
| 402 | GFPT2         | ENSG00000131459 | 5:180330834-180331494:-     | 0.29411774  | 0.055555684      | 0.014298 |
| 403 | GGA3          | ENSG00000125447 | 17:75238389-75238651:-      | 0.21481492  | 0.045751737      | 0.017635 |
| 404 | GGA3          | ENSG00000125447 | 17:75241696-75242335:-      | 0.26923084  | 0.081081175      | 0.018408 |
| 405 | GGT7          | ENSG00000131067 | 20:34860042-34860253:-      | 0.15037601  | 0.038277577      | 0.015824 |
| 406 | GHDC          | ENSG00000167925 | 17:42190270-42190623:-      | 0.40397357  | 0.127118745      | 0.010209 |
| 407 | GIT1          | ENSG00000108262 | 17:29578779-29578961:-      | 0.12456755  | 0.027160554      | 0.010262 |
| 408 | GIT1          | ENSG00000108262 | 17:29578988-29581337:-      | 0.15087725  | 0.022988547      | 0.0003   |
| 409 | GK            | ENSG00000198814 | X:30727552-30728731:+       | 0.44444453  | 0.142857307      | 0.047034 |
| 410 | GLE1          | ENSG00000119392 | 9:128527291-128527455:+     | 0.33333343  | 0.081632782      | 0.020479 |
| 411 | GNAS          | ENSG00000087460 | 20:58898985-58899948:+      | 0.175532    | 0.034883799      | 0.008699 |
| 412 | GNB4          | ENSG00000114450 | 3:179413613-179413714:-     | 0.01082007  | 0.106383202      | 0.034057 |
| 413 | GNL3          | ENSG00000163938 | 3:52693329-52693407:+       | 0.22006476  | 0.096103949      | 0.017711 |
| 414 | GNPDA2        | ENSG00000163281 | 4:44717295-44718308:-       | 0.17307701  | 0.037974767      | 0.017587 |
| 415 | GOLGA2        | ENSG00000167110 | 9:128262704-128263033:-     | 0.23275869  | 0.075949453      | 0.02679  |
| 416 | GOLGA2        | ENSG00000167110 | 9:128263092-128265584:-     | 0.11627916  | 0.009860596      | 0.010012 |
| 417 | GOPC          | ENSG00000047932 | 6:117569736-117570859:-     | 0.21476517  | 0.070351846      | 0.030663 |
| 418 | GOPC          | ENSG00000047932 | 6:117575352-117577447:-     | 0.34920642  | 0.078571522      | 0.004629 |
| 419 | GOPC          | ENSG00000047932 | 6:117577471-117578899:-     | 0.23913054  | 0.065217492      | 0.0346   |
| 420 | GPAA1         | ENSG00000197858 | 8:144083500-144083713:+     | 0.15217396  | 0.046875054      | 0.013616 |
| 421 | GPAA1         | ENSG00000197858 | 8:144085138-144085288:+     | 0.16279075  | 0.043715903      | 0.006114 |
| 422 | GPAT4         | ENSG00000158669 | 8:41609955-41610735:+       | 0.28112455  | 0.129186682      | 0.04697  |
| 423 | GPBP1         | ENSG00000062194 | 5:57237172-57246299:+       | 0.40495873  | 0.124352436      | 0.00895  |
| 424 | GPR108        | ENSG00000125734 | 19:6732549-6732986:-        | 0.39285721  | 0.088888979      | 0.001815 |
| 425 | GPR108        | ENSG00000125734 | 19:6733913-6734004:-        | 0.18264846  | 0.065217469      | 0.038813 |
| 426 | GPR108        | ENSG00000125734 | 19:6734307-6735621:-        | 0.16564423  | 0.02105273       | 0.010187 |
| 427 | GPRASP1       | ENSG00000198932 | X:102652898-102653220:+     | 0.18518531  | 0.041025758      | 0.039295 |
| 428 | GPS2          | ENSG00000132522 | 17:7313291-7313379:-        | 0.133452    | 0.055696249      | 0.028733 |
| 429 | GPS2          | ENSG00000132522 | 17:7313721-7313905:-        | 0.36120403  | 0.198564629      | 0.006163 |
| 430 | GPS2          | ENSG00000132522 | 17:7314597-7314958:-        | 0.20863312  | 0.10067118       | 0.014745 |
| 431 | GRAMD1A       | ENSG00000089351 | 19:35011554-35013255:+      | 0.15483876  | 0.052356083      | 0.028579 |
| 432 | GRAMD1A       | ENSG00000089351 | 19:35022038-35022899:+      | 0.31250006  | 0.042801627      | 0.000265 |
| 433 | GRAMD1A       | ENSG00000089351 | 19:35022911-35023235:+      | 0.48466261  | 0.087272803      | 5.47E-05 |
| 434 | GRINA         | ENSG00000178719 | 8:143992078-143992244:+     | 0.10074236  | 0.014266333      | 0.000113 |
| 435 | GRIPAP1       | ENSG00000068400 | X:48976111-48976240:-       | 0.12874255  | 0.036253811      | 0.001931 |
| 436 | GRIPAP1       | ENSG00000068400 | X:48988198-48989610:-       | 0.18624646  | 0.051823459      | 0.001001 |
| 437 | GRSF1         | ENSG00000132463 | 4:70825431-70826123:-       | 0.11414398  | 0.03467567       | 0.017661 |
| 438 | GTF3C3        | ENSG00000119041 | 2:196775251-196776009:-     | 0.10000007  | 0.023622126      | 0.047669 |
| 439 | GTPBP3        | ENSG00000130299 | 19:17341322-17341477:+      | 0.15217411  | 0.010411773      | 0.01364  |
| 440 | GTPBP6        | ENSG00000178605 | X:311627-312765:-           | 0.40217395  | 0.15909098       | 0.006942 |

| S/N | Gene Affected | ENSEMBL_ID      | Position of retained intron | IR ratio AD | IR ratio Control | p-value  |
|-----|---------------|-----------------|-----------------------------|-------------|------------------|----------|
| 441 | GTPBP6        | ENSG00000178605 | X:315299-316913:-           | 0.10606064  | 0.040909138      | 0.037489 |
| 442 | GZF1          | ENSG00000125812 | 20:23368929-23369583:+      | 0.1235956   | 0.014330726      | 0.025499 |
| 443 | HARS          | ENSG00000170445 | 5:140683219-140690854:-     | 0.14516134  | 0.046647281      | 0.014476 |
| 444 | HBS1L         | ENSG00000112339 | 6:134979268-134982457:-     | 0.11612908  | 0.032432478      | 0.009014 |
| 445 | HCFC1         | ENSG00000172534 | X:153955542-153956190:-     | 0.40000009  | 0.125000151      | 0.041518 |
| 446 | HDAC10        | ENSG00000100429 | 22:50246376-50246678:-      | 0.20491814  | 0.048000107      | 0.027145 |
| 447 | HDAC3         | ENSG00000171720 | 5:141629306-141629683:-     | 0.20155047  | 0.064935165      | 0.048609 |
| 448 | HDHD2         | ENSG00000167220 | 18:47136449-47150377:-      | 0.19480529  | 0.049505055      | 0.036602 |
| 449 | HERC3         | ENSG00000138641 | 4:88668081-88669859:+       | 0.24074084  | 0.027933041      | 0.001465 |
| 450 | HERC5         | ENSG00000138646 | 4:88500985-88504231:+       | 0.10465129  | 0.011740924      | 0.031445 |
| 451 | HEY1          | ENSG00000164683 | 8:79767092-79767218:-       | 0.10638312  | 0.012121302      | 0.03007  |
| 452 | HGS           | ENSG00000185359 | 17:81684103-81685604:+      | 0.30827076  | 0.09714298       | 0.031604 |
| 453 | HGS           | ENSG00000185359 | 17:81685689-81686311:+      | 0.13425931  | 0.051851904      | 0.03586  |
| 454 | HGS           | ENSG00000185359 | 17:81690234-81690673:+      | 0.10294123  | 0.019455302      | 0.006837 |
| 455 | HGS           | ENSG00000185359 | 17:81690742-81691446:+      | 0.13541671  | 0.011070152      | 0.00022  |
| 456 | HGS           | ENSG00000185359 | 17:81693965-81694814:+      | 0.10300434  | 0.025531966      | 0.014607 |
| 457 | HGS           | ENSG00000185359 | 17:81694853-81694923:+      | 0.18623486  | 0.044982745      | 0.001085 |
| 458 | HGS           | ENSG00000185359 | 17:81695999-81696356:+      | 0.19354842  | 0.051181146      | 0.001123 |
| 459 | HGS           | ENSG00000185359 | 17:81696747-81696823:+      | 0.10970468  | 0.027397297      | 0.003309 |
| 460 | HID1          | ENSG00000167861 | 17:74953086-74953544:-      | 0.19892482  | 0.036842184      | 0.005696 |
| 461 | HID1          | ENSG00000167861 | 17:74955956-74958140:-      | 0.16447375  | 0.046511698      | 0.016748 |
| 462 | HIST1H2AC     | ENSG00000180573 | 6:26124633-26138053:+       | 0.35714295  | 0.116666807      | 0.045131 |
| 463 | HLA-B         | ENSG00000234745 | 6:31355592-31356166:-       | 0.21300456  | 0.054115082      | 0.008087 |
| 464 | HLA-DMB       | ENSG00000242574 | 6:32934987-32935341:-       | 0.34170859  | 0.138364862      | 0.021495 |
| 465 | HM13          | ENSG00000101294 | 20:31566295-31568077:+      | 0.263889    | 0.056410383      | 0.020794 |
| 466 | HMGA1         | ENSG00000137309 | 6:34236963-34237203:+       | 0.11290337  | 0.016393546      | 0.048761 |
| 467 | HMGCS1        | ENSG00000112972 | 5:43297166-43298008:-       | 0.11467896  | 0.0342613        | 0.026682 |
| 468 | HNRNPA2B1     | ENSG00000122566 | 7:26197866-26200571:-       | 0.1789773   | 0.086274542      | 0.009923 |
| 469 | HNRNPA2B1     | ENSG00000122566 | 7:26192338-26192494:-       | 0.30264134  | 0.165661739      | 0.007683 |
| 470 | HNRNPA3       | ENSG00000170144 | 2:177219314-177219407:+     | 0.10786916  | 0.041167684      | 0.000548 |
| 471 | HNRNPH1       | ENSG00000169045 | 5:179615595-179616125:-     | 0.11467578  | 0.07007128       | 0.043164 |
| 472 | HNRNPH1       | ENSG00000169045 | 5:179617110-179617513:-     | 0.26169849  | 0.108108171      | 0.012327 |
| 473 | HNRNPH1       | ENSG00000169045 | 5:179618323-179619268:-     | 0.42206407  | 0.208333363      | 0.000102 |
| 474 | HNRNPH1       | ENSG00000169045 | 5:179621035-179621241:-     | 0.21254615  | 0.111538503      | 0.021367 |
| 475 | HNRNPH1       | ENSG00000169045 | 5:179621397-179623036:-     | 0.2664942   | 0.129213519      | 0.004076 |
| 476 | HTRA2         | ENSG00000115317 | 2:74531105-74531338:+       | 0.20647777  | 0.088803137      | 0.017442 |
| 477 | IDH3B         | ENSG00000101365 | 20:2660365-2660456:-        | 0.14012744  | 0.023136282      | 0.00013  |
| 478 | IDH3B         | ENSG00000101365 | 20:2660590-2660696:-        | 0.12127239  | 0.03140706       | 0.000195 |
| 479 | IDUA          | ENSG00000127415 | 4:1001563-1001678:+         | 0.28571443  | 0.040816512      | 0.030422 |
| 480 | IFRD2         | ENSG00000214706 | 3:50290294-50290387:-       | 0.04504513  | 0.183333489      | 0.035385 |
| 481 | IFRD2         | ENSG00000214706 | 3:50289628-50289711:-       | 0.15942043  | 0.014149313      | 0.015465 |
| 482 | IFT172        | ENSG00000138002 | 2:27458868-27459377:-       | 0.38461546  | 0.146067544      | 0.049998 |
| 483 | IKBKB         | ENSG00000104365 | 8:42319421-42319584:+       | 0.25203265  | 0.040000176      | 0.033993 |
| 484 | ILVBL         | ENSG00000105135 | 19:15115671-15115849:-      | 0.16309018  | 0.046296356      | 0.010655 |
| 485 | ILVBL         | ENSG00000105135 | 19:15115921-15116000:-      | 0.22317601  | 0.084577177      | 0.017722 |
| 486 | IMPDH2        | ENSG00000178035 | 3:49026886-49026959:-       | 0.12933758  | 0.055702968      | 0.047167 |
| 487 | IMPDH2        | ENSG00000178035 | 3:49028532-49028757:-       | 0.23722632  | 0.07665511       | 0.004455 |
| 488 | IMPDH2        | ENSG00000178035 | 3:49028806-49029252:-       | 0.26486492  | 0.060606126      | 0.001508 |
| 489 | INPP4A        | ENSG00000040933 | 2:98559495-98563464:+       | 0.20000011  | 0.039215779      | 0.019113 |

| S/N | Gene Affected | ENSEMBL_ID      | Position of retained intron | IR ratio AD | IR ratio Control | p-value  |
|-----|---------------|-----------------|-----------------------------|-------------|------------------|----------|
| 490 | INPP5E        | ENSG00000148384 | 9:136433075-136433154:-     | 0.2698414   | 0.036363804      | 0.023471 |
| 491 | INTS1         | ENSG00000164880 | 7:1481488-1482545:-         | 0.31958777  | 0.053333486      | 0.016684 |
| 492 | INTS1         | ENSG00000164880 | 7:1482707-1483741:-         | 0.38666674  | 0.090909192      | 0.003969 |
| 493 | INTS1         | ENSG00000164880 | 7:1483853-1484002:-         | 0.39316247  | 0.103092894      | 0.008501 |
| 494 | INTS8         | ENSG00000164941 | 8:94876147-94876220:+       | 0.17745808  | 0.06130274       | 0.014478 |
| 495 | IRF3          | ENSG00000126456 | 19:49663514-49664442:-      | 0.33333343  | 0.067567696      | 0.01189  |
| 496 | ISOC2         | ENSG00000063241 | 19:55455330-55455635:-      | 0.19626177  | 0.047058907      | 0.015432 |
| 497 | ITGA3         | ENSG00000005884 | 17:50075526-50075598:+      | 0.22857174  | 0.018394134      | 0.032917 |
| 498 | ITGAE         | ENSG00000083457 | 17:3720402-3723687:-        | 0.15706812  | 0.045977075      | 0.016868 |
| 499 | ITGB4         | ENSG00000132470 | 17:75755850-75756428:+      | 0.23788553  | 0.076923165      | 0.021227 |
| 500 | ITPA          | ENSG00000125877 | 20:3218632-3221840:+        | 0.20805377  | 0.069307025      | 0.040668 |
| 501 | IZUMO4        | ENSG00000099840 | 19:2097495-2097928:+        | 0.14673918  | 0.013513583      | 0.002695 |
| 502 | JOSD2         | ENSG00000161677 | 19:50507699-50510285:-      | 0.13978498  | 0.054945101      | 0.023652 |
| 503 | KANSL3        | ENSG00000114982 | 2:96602862-96604249:-       | 0.1000001   | 0.013435058      | 0.041157 |
| 504 | KCNAB1        | ENSG00000169282 | 3:156523947-156531408:+     | 0.17266194  | 0.058419321      | 0.037576 |
| 505 | KCTD17        | ENSG00000100379 | 22:37059438-37062524:+      | 0.17500006  | 0.047846954      | 0.010944 |
| 506 | KCTD17        | ENSG00000100379 | 22:37061629-37062524:+      | 0.29797986  | 0.082608776      | 0.004922 |
| 507 | KDM3A         | ENSG00000115548 | 2:86478029-86478169:+       | 0.12796218  | 0.028571522      | 0.041232 |
| 508 | KDM5C         | ENSG00000126012 | X:53198637-53198763:-       | 0.37305704  | 0.159624496      | 0.021611 |
| 509 | KDM6A         | ENSG00000147050 | X:45082640-45082714:+       | 0.25263167  | 0.011557041      | 0.000921 |
| 510 | KHDRBS3       | ENSG00000131773 | 8:135648121-135648539:+     | 0.08496738  | 0.228915778      | 0.038447 |
| 511 | KIAA0368      | ENSG00000136813 | 9:111383332-111384521:-     | 0.13962268  | 0.030898916      | 0.001016 |
| 512 | KIAA1191      | ENSG00000122203 | 5:176355749-176361601:-     | 0.28571442  | 0.052083466      | 0.025433 |
| 513 | KIAA1586      | ENSG00000168116 | 6:57047396-57050773:+       | 0.1379313   | 0.01174094       | 0.03653  |
| 514 | KIDINS220     | ENSG00000134313 | 2:8736999-8750111:-         | 0.4880953   | 0.088050446      | 0.002686 |
| 515 | KIF19         | ENSG00000196169 | 17:74346524-74347776:+      | 0.13333355  | 0.013459123      | 0.041128 |
| 516 | KIZ           | ENSG00000088970 | 20:21244288-21246478:+      | 0.4038462   | 0.182795781      | 0.024595 |
| 517 | KLC4          | ENSG00000137171 | 6:43066525-43066995:+       | 0.16935491  | 0.050505147      | 0.048697 |
| 518 | KLC4          | ENSG00000137171 | 6:43073338-43073901:+       | 0.15547707  | 0.058479593      | 0.032013 |
| 519 | KLHL18        | ENSG00000114648 | 3:47340676-47342718:+       | 0.35714297  | 0.057692474      | 0.017418 |
| 520 | KLHL18        | ENSG00000114648 | 3:47342830-47343554:+       | 0.32500018  | 0.048780716      | 0.045904 |
| 521 | KLHL22        | ENSG00000099910 | 22:20446676-20457807:-      | 0.16000008  | 0.031055974      | 0.011053 |
| 522 | KPTN          | ENSG00000118162 | 19:47480407-47480759:-      | 0.57831332  | 0.203125148      | 0.029549 |
| 523 | KRBOX4        | ENSG00000147121 | X:46463308-46471141:+       | 0.61538469  | 0.163265503      | 0.028411 |
| 524 | KYAT1         | ENSG00000171097 | 9:128835868-128835996:-     | 0.14705894  | 0.026315892      | 0.034253 |
| 525 | L1CAM         | ENSG00000198910 | X:153868952-153869519:-     | 0.14285731  | 0.020100614      | 0.035009 |
| 526 | L3MBTL2       | ENSG00000100395 | 22:41209933-41213892:+      | 0.1097562   | 0.021897896      | 0.044793 |
| 527 | L3MBTL2       | ENSG00000100395 | 22:41227869-41229539:+      | 0.16666674  | 0.040983691      | 0.025073 |
| 528 | L3MBTL2       | ENSG00000100395 | 22:41229656-41230138:+      | 0.20731714  | 0.07602348       | 0.048083 |
| 529 | LAIR1         | ENSG00000167613 | 19:54356267-54356355:-      | 0.16923117  | 0.011261756      | 0.042579 |
| 530 | LAMB2         | ENSG00000172037 | 3:49123052-49123131:-       | 0.20588241  | 0.034482838      | 0.003452 |
| 531 | LAMB2         | ENSG00000172037 | 3:49129324-49129603:-       | 0.41489376  | 0.076923255      | 0.01849  |
| 532 | LAMP2         | ENSG00000005893 | X:120428626-120441729:-     | 0.5024631   | 0.152343845      | 0.002109 |
| 533 | LARS          | ENSG00000133706 | 5:146144349-146144471:-     | 0.1859297   | 0.060913764      | 0.009463 |
| 534 | LARS          | ENSG00000133706 | 5:146144537-146144623:-     | 0.24813899  | 0.090047438      | 0.001722 |
| 535 | LCA5          | ENSG00000135338 | 6:79487866-79489083:-       | 0.07216506  | 0.291666936      | 0.039611 |
| 536 | LDHD          | ENSG00000166816 | 16:75112713-75112833:-      | 0.17391313  | 0.051724235      | 0.049507 |
| 537 | LGALS9        | ENSG00000168961 | 17:27647432-27648835:+      | 0.14204552  | 0.036036122      | 0.031834 |
| 538 | LGI3          | ENSG00000168481 | 8:22148977-22151488:-       | 0.14051528  | 0.038461589      | 0.006211 |

| S/N | Gene Affected | ENSEMBL_ID      | Position of retained intron | IR ratio AD | IR ratio Control | p-value  |
|-----|---------------|-----------------|-----------------------------|-------------|------------------|----------|
| 539 | LGI3          | ENSG00000168481 | 8:22154213-22154559:-       | 0.16502469  | 0.065645583      | 0.040383 |
| 540 | LIN7B         | ENSG00000104863 | 19:49118018-49118351:+      | 0.37356327  | 0.084112235      | 0.001059 |
| 541 | LLGL1         | ENSG00000131899 | 17:18240873-18241450:+      | 0.40000005  | 0.192488342      | 0.02997  |
| 542 | LMBR1         | ENSG00000105983 | 7:156728007-156728643:-     | 0.13281257  | 0.032967101      | 0.022638 |
| 543 | LONP1         | ENSG00000196365 | 19:5708403-5711770:-        | 0.11518329  | 0.042016855      | 0.034757 |
| 544 | LRP11         | ENSG00000120256 | 6:149820703-149826263:-     | 0.17989423  | 0.036474212      | 0.000909 |
| 545 | LRP11         | ENSG00000120256 | 6:149837463-149842982:-     | 0.12307698  | 0.036923122      | 0.01605  |
| 546 | LRP2BP        | ENSG00000109771 | 4:185377018-185378080:-     | 0.55072469  | 0.213333472      | 0.038331 |
| 547 | LRSAM1        | ENSG00000148356 | 9:127452084-127454495:+     | 0.28125015  | 0.005933598      | 0.000307 |
| 548 | LRSAM1        | ENSG00000148356 | 9:127497334-127501009:+     | 0.20161296  | 0.039215741      | 0.001248 |
| 549 | LRWD1         | ENSG00000161036 | 7:102469882-102472217:+     | 0.16923088  | 0.040404146      | 0.046142 |
| 550 | LSM14B        | ENSG00000149657 | 20:62126439-62127584:+      | 0.25925934  | 0.04255327       | 0.00228  |
| 551 | LSM14B        | ENSG00000149657 | 20:62127701-62129784:+      | 0.32967041  | 0.048780584      | 0.001661 |
| 552 | LSM7          | ENSG00000130332 | 19:2324192-2328386:-        | 0.36521746  | 0.119266157      | 0.016766 |
| 553 | LTV1          | ENSG00000135521 | 6:143858007-143860425:+     | 0.29850752  | 0.090909169      | 0.006977 |
| 554 | LTV1          | ENSG00000135521 | 6:143860553-143862103:+     | 0.32558148  | 0.118644188      | 0.045871 |
| 555 | LZTFL1        | ENSG00000163818 | 3:45827459-45828438:-       | 0.19259268  | 0.045833424      | 0.018343 |
| 556 | MAEA          | ENSG00000090316 | 4:1322503-1327626:+         | 0.11711719  | 0.015957507      | 0.00707  |
| 557 | MAEA          | ENSG00000090316 | 4:1338617-1339073:+         | 0.12068972  | 0.03272733       | 0.019769 |
| 558 | MAGED2        | ENSG00000102316 | X:54815690-54815880:+       | 0.24803152  | 0.153134678      | 0.049416 |
| 559 | MAN1B1        | ENSG00000177239 | 9:137106315-137106688:+     | 0.11504433  | 0.026881792      | 0.032681 |
| 560 | MAN2B2        | ENSG00000013288 | 4:6617492-6619926:+         | 0.51190482  | 0.193181949      | 0.032548 |
| 561 | MAN2B2        | ENSG00000013288 | 4:6620044-6621187:+         | 0.32203396  | 0.06000008       | 0.001202 |
| 562 | MAP2K7        | ENSG00000076984 | 19:7910373-7910452:+        | 0.10638304  | 0.015354342      | 0.035377 |
| 563 | MAP3K7        | ENSG00000135341 | 6:90550549-90552048:-       | 0.56338032  | 0.166666758      | 0.001614 |
| 564 | MAP4          | ENSG00000047849 | 3:47852938-47855247:-       | 0.33333343  | 0.1052633        | 0.046421 |
| 565 | MAP7          | ENSG00000135525 | 6:136377868-136388392:-     | 0.38461549  | 0.118644227      | 0.049487 |
| 566 | MAPK11        | ENSG00000185386 | 22:50266611-50266933:-      | 0.18539331  | 0.072674484      | 0.033372 |
| 567 | MAPK14        | ENSG00000112062 | 6:36100267-36102570:+       | 0.33928581  | 0.091836877      | 0.033958 |
| 568 | MAPRE3        | ENSG00000084764 | 2:27024252-27025582:+       | 0.24230774  | 0.108359209      | 0.043656 |
| 569 | MAPT          | ENSG00000186868 | 17:45971945-45974384:+      | 0.15000039  | 0.008622288      | 0.040906 |
| 570 | MAST1         | ENSG00000105613 | 19:12866102-12866652:+      | 0.52777786  | 0.071749082      | 0.006887 |
| 571 | MAST3         | ENSG00000099308 | 19:18121922-18122672:+      | 0.19298258  | 0.030769332      | 0.017036 |
| 572 | MAST3         | ENSG00000099308 | 19:18122751-18123216:+      | 0.14516137  | 0.03311266       | 0.021757 |
| 573 | MAST3         | ENSG00000099308 | 19:18128458-18128865:+      | 0.37278116  | 0.095420004      | 0.019927 |
| 574 | MATR3         | ENSG00000015479 | 5:139314736-139315696:+     | 0.23265744  | 0.090981685      | 0.001066 |
| 575 | MBTPS1        | ENSG00000140943 | 16:84065767-84066488:-      | 0.1028807   | 0.030188725      | 0.016225 |
| 576 | MCM3AP        | ENSG00000160294 | 21:46241017-46242801:-      | 0.12536446  | 0.060606098      | 0.044602 |
| 577 | MCOLN1        | ENSG00000090674 | 19:7527960-7528157:+        | 0.11290332  | 0.013605523      | 0.017584 |
| 578 | MCOLN1        | ENSG00000090674 | 19:7528257-7528596:+        | 0.14782617  | 0.004637176      | 0.000225 |
| 579 | MCOLN1        | ENSG00000090674 | 19:7528703-7528820:+        | 0.20833344  | 0.023809644      | 0.012923 |
| 580 | MED10         | ENSG00000133398 | 5:6372601-6374323:-         | 0.12851409  | 0.058536623      | 0.035555 |
| 581 | MED24         | ENSG00000008838 | 17:40023395-40026155:-      | 0.17197459  | 0.045454612      | 0.01193  |
| 582 | MED24         | ENSG00000008838 | 17:40027034-40027382:-      | 0.17721524  | 0.030434831      | 0.000679 |
| 583 | MED24         | ENSG00000008838 | 17:40027465-40027908:-      | 0.2064517   | 0.061320853      | 0.033011 |
| 584 | MED24         | ENSG00000008838 | 17:40027946-40028825:-      | 0.22516563  | 0.050000075      | 0.00463  |
| 585 | MED25         | ENSG00000104973 | 19:49832415-49834985:+      | 0.10328643  | 0.024691402      | 0.008082 |
| 586 | MED25         | ENSG00000104973 | 19:49828547-49828969:+      | 0.13661207  | 0.041237171      | 0.019651 |
| 587 | MFSD10        | ENSG00000109736 | 4:2931150-2931226:-         | 0.16666672  | 0.035971292      | 0.007866 |

| S/N | Gene Affected | ENSEMBL_ID      | Position of retained intron | IR ratio AD | IR ratio Control | p-value  |
|-----|---------------|-----------------|-----------------------------|-------------|------------------|----------|
| 588 | MFSD12        | ENSG00000161091 | 19:3544732-3544808:-        | 0.33720939  | 0.098214409      | 0.025515 |
| 589 | MINK1         | ENSG00000141503 | 17:4893067-4893285:+        | 0.50961543  | 0.076555126      | 0.000284 |
| 590 | MINK1         | ENSG00000141503 | 17:4893309-4893433:+        | 0.53030308  | 0.108910994      | 0.000608 |
| 591 | MINK1         | ENSG00000141503 | 17:4893597-4893987:+        | 0.27380956  | 0.109090969      | 0.011181 |
| 592 | MINK1         | ENSG00000141503 | 17:4894311-4894524:+        | 0.10851069  | 0.030769273      | 0.008267 |
| 593 | MINK1         | ENSG00000141503 | 17:4895832-4896002:+        | 0.20030584  | 0.040662678      | 1.73E-06 |
| 594 | MLLT6         | ENSG00000275023 | 17:38715828-38716366:+      | 0.3826367   | 0.152439099      | 0.010581 |
| 595 | MLLT6         | ENSG00000275023 | 17:38717953-38719516:+      | 0.10948911  | 0.0333334        | 0.043247 |
| 596 | MLLT6         | ENSG00000275023 | 17:38707540-38707762:+      | 0.11382119  | 0.015625078      | 0.01279  |
| 597 | MORF4L2       | ENSG00000123562 | X:103685260-103686630:-     | 0.12571433  | 0.018579987      | 1.68E-05 |
| 598 | MORF4L2       | ENSG00000123562 | X:103677051-103685170:-     | 0.12461065  | 0.034869304      | 0.017982 |
| 599 | MPHOSPH6      | ENSG00000135698 | 16:82149403-82151423:-      | 0.2021661   | 0.086956565      | 0.011979 |
| 600 | MPP1          | ENSG00000130830 | X:154781802-154783426:-     | 0.11182113  | 0.047297343      | 0.04453  |
| 601 | MPP1          | ENSG00000130830 | X:154783507-154784027:-     | 0.12264156  | 0.026966329      | 0.001696 |
| 602 | MPP1          | ENSG00000130830 | X:154784108-154785050:-     | 0.10344833  | 0.021844699      | 0.003923 |
| 603 | MPRIP         | ENSG00000133030 | 17:17147387-17150143:+      | 0.17788465  | 0.055016224      | 0.002334 |
| 604 | MPV17         | ENSG00000115204 | 2:27311951-27312213:-       | 0.1920375   | 0.093181863      | 0.026343 |
| 605 | MPV17         | ENSG00000115204 | 2:27312246-27312493:-       | 0.24945773  | 0.127572074      | 0.035841 |
| 606 | MRAS          | ENSG00000158186 | 3:138348325-138372865:+     | 0.17857165  | 0.009514208      | 0.008209 |
| 607 | MRFAP1L1      | ENSG00000178988 | 4:6708643-6709230:-         | 0.35361845  | 0.175213749      | 0.022041 |
| 608 | MROH1         | ENSG00000179832 | 8:144260374-144260676:+     | 0.50602414  | 0.152318014      | 0.012184 |
| 609 | MROH1         | ENSG00000179832 | 8:144261041-144261113:+     | 0.12903237  | 0.017045533      | 0.014307 |
| 610 | MROH1         | ENSG00000179832 | 8:144192401-144199121:+     | 0.13888907  | 0.016535461      | 0.047479 |
| 611 | MRPL2         | ENSG00000112651 | 6:43055618-43055896:-       | 0.10000006  | 0.028368848      | 0.029648 |
| 612 | MRPL38        | ENSG00000204316 | 17:75901273-75901711:-      | 0.2975207   | 0.125506139      | 0.016316 |
| 613 | MRPL39        | ENSG00000154719 | 21:25585754-25588834:-      | 0.24657539  | 0.096774258      | 0.01621  |
| 614 | MRPL4         | ENSG00000105364 | 19:10258522-10258608:+      | 0.27941185  | 0.085858712      | 0.028804 |
| 615 | MRPL58        | ENSG00000167862 | 17:75012872-75017077:+      | 0.23809533  | 0.060000105      | 0.026427 |
| 616 | MRPS26        | ENSG00000125901 | 20:3046737-3047734:+        | 0.12500003  | 0.046683082      | 0.010551 |
| 617 | MRPS5         | ENSG00000144029 | 2:95101723-95104639:-       | 0.34219271  | 0.145383133      | 9.20E-05 |
| 618 | MSH6          | ENSG00000116062 | 2:47805707-47806203:+       | 0.03989364  | 0.137440818      | 0.002578 |
| 619 | MSL3          | ENSG00000005302 | X:11760937-11761499:+       | 0.12500007  | 0.032653125      | 0.02338  |
| 620 | MYH7B         | ENSG00000078814 | 20:34997640-34998294:+      | 0.12676071  | 0.011261705      | 0.018615 |
| 621 | MYH9          | ENSG00000100345 | 22:36305102-36305929:-      | 0.11111118  | 0.026455092      | 0.023939 |
| 622 | MYL5          | ENSG00000215375 | 4:680018-680508:+           | 0.12345693  | 0.016284924      | 0.048862 |
| 623 | MYO15B        | ENSG00000266714 | 17:75620357-75620466:+      | 0.00532082  | 0.102272876      | 0.003332 |
| 624 | MYO9B         | ENSG00000099331 | 19:17162466-17162987:+      | 0.20000012  | 0.03333349       | 0.040907 |
| 625 | MYO9B         | ENSG00000099331 | 19:17181040-17183828:+      | 0.02162168  | 0.129032405      | 0.015752 |
| 626 | MYOM2         | ENSG00000036448 | 8:2123365-2123554:+         | 0.24786336  | 0.040000106      | 0.008118 |
| 627 | MYPOP         | ENSG00000176182 | 19:45901825-45902569:-      | 0.21212139  | 0.032258228      | 0.04951  |
| 628 | MZT2B         | ENSG00000152082 | 2:130183966-130190468:+     | 0.19753093  | 0.074074147      | 0.049938 |
| 629 | NAA10         | ENSG00000102030 | X:153930847-153932070:-     | 0.30241938  | 0.147410399      | 0.004687 |
| 630 | NAA10         | ENSG00000102030 | X:153932115-153932315:-     | 0.13194448  | 0.050125356      | 0.017699 |
| 631 | NAA20         | ENSG00000173418 | 20:20026919-20032507:+      | 0.11720701  | 0.046017735      | 0.014225 |
| 632 | NAA38         | ENSG00000183011 | 17:7856843-7856984:-        | 0.17142865  | 0.032467605      | 0.008051 |
| 633 | NABP1         | ENSG00000173559 | 2:191683804-191684229:+     | 0.15384644  | 0.014521685      | 0.046664 |
| 634 | NACAD         | ENSG00000136274 | 7:45081672-45081754:-       | 0.1488971   | 0.045634962      | 0.003287 |
| 635 | NAE1          | ENSG00000159593 | 16:66823600-66824854:-      | 0.12015509  | 0.043189422      | 0.033959 |
| 636 | NAE1          | ENSG00000159593 | 16:66824885-66826522:-      | 0.1115703   | 0.040000055      | 0.04366  |

| S/N | Gene Affected | ENSEMBL_ID       | Position of retained intron | IR ratio AD | IR ratio Control | p-value  |
|-----|---------------|------------------|-----------------------------|-------------|------------------|----------|
| 637 | NARF          | ENSG00000141562  | 17:82478918-82481081:+      | 0.20253169  | 0.035573167      | 0.000225 |
| 638 | NAT14         | ENSG00000090971  | 19:55485780-55486407:+      | 0.21428578  | 0.076087039      | 0.036593 |
| 639 | NBEAL2        | ENSG00000160796  | 3:47003309-47003815:+       | 0.32352975  | 0.032460186      | 0.045159 |
| 640 | NCAPH2        | ENSG00000025770  | 22:50521036-50521542:+      | 0.31914898  | 0.123287742      | 0.011718 |
| 641 | NCKIPSD       | ENSG000000213672 | 3:48678969-48679054:-       | 0.16425125  | 0.050100248      | 0.005391 |
| 642 | NDUFA10       | ENSG00000130414  | 2:240011696-240014738:-     | 0.44269343  | 0.187317134      | 0.001114 |
| 643 | NDUFB2        | ENSG00000090266  | 7:140697391-140702865:+     | 0.3611112   | 0.123456927      | 0.049876 |
| 644 | NELFE         | ENSG000000204356 | 6:31953831-31954079:-       | 0.42967247  | 0.258227902      | 0.035346 |
| 645 | NEURL4        | ENSG000000215041 | 17:7323123-7323484:-        | 0.42718455  | 0.100000126      | 0.007665 |
| 646 | NICN1         | ENSG00000145029  | 3:49424874-49424948:-       | 0.17525779  | 0.030075239      | 0.000902 |
| 647 | NICN1         | ENSG00000145029  | 3:49425438-49425882:-       | 0.17500007  | 0.057692378      | 0.030484 |
| 648 | NICN1         | ENSG00000145029  | 3:49425996-49426251:-       | 0.21186449  | 0.041176552      | 0.006762 |
| 649 | NIPSNAP3B     | ENSG00000165028  | 9:104772908-104772996:+     | 0.23529425  | 0.023622152      | 0.006563 |
| 650 | NMI           | ENSG00000123609  | 2:151275670-151275757:-     | 0.18965541  | 0.009046308      | 0.00793  |
| 651 | NMT1          | ENSG00000136448  | 17:45103876-45104858:+      | 0.13871639  | 0.046992518      | 0.004234 |
| 652 | NONO          | ENSG00000147140  | X:71298816-71299941:+       | 0.10410096  | 0.033670055      | 0.000577 |
| 653 | NONO          | ENSG00000147140  | X:71297938-71298468:+       | 0.23292472  | 0.107476675      | 0.005989 |
| 654 | NOP56         | ENSG00000101361  | 20:2655746-2655933:+        | 0.11041014  | 0.019002411      | 0.000829 |
| 655 | NPAS2         | ENSG00000170485  | 2:100988276-100990255:+     | 0.20652182  | 0.061403603      | 0.035881 |
| 656 | NPR2          | ENSG00000159899  | 9:35805670-35805829:+       | 0.12328779  | 0.017060387      | 0.046376 |
| 657 | NPR2          | ENSG00000159899  | 9:35800157-35800388:+       | 0.15384629  | 0.017619743      | 0.029682 |
| 658 | NPRL2         | ENSG00000114388  | 3:50348410-50348526:-       | 0.18274119  | 0.058558634      | 0.026035 |
| 659 | NPRL2         | ENSG00000114388  | 3:50349010-50349385:-       | 0.27464793  | 0.082353005      | 0.004127 |
| 660 | NPTX2         | ENSG00000106236  | 7:98619859-98624921:+       | 0.12658236  | 0.023529477      | 0.015552 |
| 661 | NR1D1         | ENSG00000126368  | 17:40094122-40094934:-      | 0.10762335  | 0.042857176      | 0.014837 |
| 662 | NR1D1         | ENSG00000126368  | 17:40096087-40096442:-      | 0.12500005  | 0.036529735      | 0.019605 |
| 663 | NR4A2         | ENSG00000153234  | 2:156326000-156326149:-     | 0.13114769  | 0.014330738      | 0.034551 |
| 664 | NRBP1         | ENSG00000115216  | 2:27435227-27435722:+       | 0.5789474   | 0.153846287      | 0.005153 |
| 665 | NRBP1         | ENSG00000115216  | 2:27435227-27436752:+       | 0.17587942  | 0.069478943      | 0.003835 |
| 666 | NRBP1         | ENSG00000115216  | 2:27435746-27436752:+       | 0.75630254  | 0.192307821      | 0.001297 |
| 667 | NSUN2         | ENSG00000037474  | 5:6600232-6602460:-         | 0.19306935  | 0.05990789       | 0.007611 |
| 668 | NUP50         | ENSG00000093000  | 22:45168246-45171599:+      | 0.20930246  | 0.030303172      | 0.030517 |
| 669 | NUP50         | ENSG00000093000  | 22:45171683-45175893:+      | 0.16666674  | 0.033898389      | 0.016614 |
| 670 | NUP85         | ENSG00000125450  | 17:75235201-75235577:+      | 0.13705588  | 0.045454604      | 0.026463 |
| 671 | OCIAD1        | ENSG00000109180  | 4:48851975-48860724:+       | 0.31372552  | 0.115839293      | 0.001514 |
| 672 | OGFOD1        | ENSG00000087263  | 16:56462634-56466151:+      | 0.11428581  | 0.017543949      | 0.032512 |
| 673 | OGFOD1        | ENSG00000087263  | 16:56466967-56467164:+      | 0.38562097  | 0.175532017      | 0.047826 |
| 674 | OGFOD1        | ENSG00000087263  | 16:56467293-56467904:+      | 0.17391313  | 0.037634483      | 0.012438 |
| 675 | OGFOD1        | ENSG00000087263  | 16:56468018-56470002:+      | 0.18421058  | 0.052401797      | 0.006214 |
| 676 | OGFOD1        | ENSG00000087263  | 16:56470082-56470486:+      | 0.19047626  | 0.030769293      | 0.001821 |
| 677 | OGFOD1        | ENSG00000087263  | 16:56470791-56474827:+      | 0.14358979  | 0.04587161       | 0.013576 |
| 678 | OGFOD1        | ENSG00000087263  | 16:56474950-56475506:+      | 0.12000004  | 0.032258109      | 0.007356 |
| 679 | OGFOD1        | ENSG00000087263  | 16:56453408-56458547:+      | 0.10810821  | 0.017699207      | 0.040947 |
| 680 | ORC3          | ENSG00000135336  | 6:87656982-87657920:+       | 0.201878    | 0.077777859      | 0.042723 |
| 681 | OSBPL7        | ENSG00000006025  | 17:47816482-47816562:-      | 0.2222225   | 0.018394126      | 0.029631 |
| 682 | OSTC          | ENSG00000198856  | 4:108650794-108655563:+     | 0.16564425  | 0.020134303      | 0.003977 |
| 683 | PACSIN2       | ENSG00000100266  | 22:42876333-42879047:-      | 0.27659586  | 0.058823654      | 0.023135 |
| 684 | PACSIN2       | ENSG00000100266  | 22:42879169-42880616:-      | 0.56097563  | 0.095652329      | 0.004207 |
| 685 | PACSIN2       | ENSG00000100266  | 22:42880622-42882183:-      | 0.43243252  | 0.053571597      | 0.008386 |

| S/N | Gene Affected | ENSEMBL_ID      | Position of retained intron | IR ratio AD | IR ratio Control | p-value  |
|-----|---------------|-----------------|-----------------------------|-------------|------------------|----------|
| 686 | PAK1IP1       | ENSG00000111845 | 6:10703457-10704506:+       | 0.13461546  | 0.034090979      | 0.026833 |
| 687 | PAK1IP1       | ENSG00000111845 | 6:10707514-10708952:+       | 0.12751684  | 0.039325908      | 0.036175 |
| 688 | PARP8         | ENSG00000151883 | 5:50826803-50827943:+       | 0.12048202  | 0.020000075      | 0.020342 |
| 689 | PARP8         | ENSG00000151883 | 5:50828056-50828311:+       | 0.12962971  | 0.034965117      | 0.046838 |
| 690 | PCBP4         | ENSG00000090097 | 3:51958349-51958789:-       | 0.13005276  | 0.048543734      | 0.017108 |
| 691 | PCED1A        | ENSG00000132635 | 20:2836314-2838231:-        | 0.35173826  | 0.164634185      | 0.002007 |
| 692 | PCGF1         | ENSG00000115289 | 2:74505190-74505338:-       | 0.2396695   | 0.075268925      | 0.040835 |
| 693 | PCIF1         | ENSG00000100982 | 20:45939339-45940474:+      | 0.21678327  | 0.074324398      | 0.023234 |
| 694 | PCM1          | ENSG00000078674 | 8:17953186-17955469:+       | 0.15306128  | 0.044586056      | 0.021645 |
| 695 | PCNT          | ENSG00000160299 | 21:46430657-46431528:+      | 0.28169023  | 0.075000116      | 0.025889 |
| 696 | PCYT2         | ENSG00000185813 | 17:81906177-81906463:-      | 0.15107918  | 0.047138097      | 0.009326 |
| 697 | PDAP1         | ENSG00000106244 | 7:99396740-99397861:-       | 0.15893274  | 0.038543921      | 7.92E-06 |
| 698 | PDE7A         | ENSG00000205268 | 8:65724351-65724776:-       | 0.10937508  | 0.013435056      | 0.026396 |
| 699 | PDHA1         | ENSG00000131828 | X:19354583-19355348:+       | 0.27528094  | 0.100358482      | 0.003789 |
| 700 | PDHA1         | ENSG00000131828 | X:19353173-19354490:+       | 0.20802924  | 0.087939753      | 0.019052 |
| 701 | PDXK          | ENSG00000160209 | 21:43743807-43746078:+      | 0.16886546  | 0.048543717      | 0.000151 |
| 702 | PDZD4         | ENSG00000067840 | X:153806840-153807278:-     | 0.18402784  | 0.049896118      | 0.007932 |
| 703 | PER2          | ENSG00000132326 | 2:238249212-238250550:-     | 0.25806485  | 0.018394141      | 0.028721 |
| 704 | PHF1          | ENSG00000112511 | 6:33413557-33413735:+       | 0.28571432  | 0.088560936      | 0.000876 |
| 705 | PHF1          | ENSG00000112511 | 6:33413831-33414040:+       | 0.19653182  | 0.073482471      | 0.005116 |
| 706 | PHF20         | ENSG00000025293 | 20:35939108-35940863:+      | 0.25423748  | 0.025316616      | 0.021223 |
| 707 | PHIP          | ENSG00000146247 | 6:78969917-78970048:-       | 0.16981159  | 0.00875913       | 0.013348 |
| 708 | PIAS4         | ENSG00000105229 | 19:4033580-4037373:+        | 0.51428582  | 0.117647236      | 0.018198 |
| 709 | PIGO          | ENSG00000165282 | 9:35093580-35093900:-       | 0.11111124  | 0.011036469      | 0.023053 |
| 710 | PIGS          | ENSG00000087111 | 17:28556972-28558475:-      | 0.15000007  | 0.034013679      | 0.018264 |
| 711 | PIGT          | ENSG00000124155 | 20:45420693-45421382:+      | 0.14239487  | 0.03641461       | 0.002943 |
| 712 | PIGT          | ENSG00000124155 | 20:45421583-45424215:+      | 0.11708864  | 0.033950656      | 0.005549 |
| 713 | PIH1D1        | ENSG00000104872 | 19:49447099-49447337:-      | 0.29285719  | 0.063380335      | 0.000155 |
| 714 | PIH1D1        | ENSG00000104872 | 19:49447908-49448000:-      | 0.19930075  | 0.050131979      | 0.00172  |
| 715 | PIK3R1        | ENSG00000145675 | 5:68290834-68292258:+       | 0.25454555  | 0.032374202      | 0.005027 |
| 716 | PISD          | ENSG00000241878 | 22:31619836-31620552:-      | 0.19339628  | 0.049833939      | 0.002459 |
| 717 | PISD          | ENSG00000241878 | 22:31620713-31620995:-      | 0.12413804  | 0.024793473      | 0.030297 |
| 718 | PITPNB        | ENSG00000180957 | 22:27853663-27854853:-      | 0.18681324  | 0.042553247      | 0.002548 |
| 719 | PITPNB        | ENSG00000180957 | 22:27853663-27858386:-      | 0.18656724  | 0.046948431      | 0.012862 |
| 720 | PITPNB        | ENSG00000180957 | 22:27854939-27858386:-      | 0.14743595  | 0.043103504      | 0.014179 |
| 721 | PKDCC         | ENSG00000162878 | 2:42053361-42054035:+       | 0.17741948  | 0.036144705      | 0.047823 |
| 722 | PKP4          | ENSG00000144283 | 2:158676867-158678580:+     | 0.04312019  | 0.213750149      | 0.000187 |
| 723 | PLA2G15       | ENSG00000103066 | 16:68255037-68255281:+      | 0.11320775  | 0.008900394      | 0.025093 |
| 724 | PLA2G6        | ENSG00000184381 | 22:38113654-38115526:-      | 0.10606067  | 0.015789536      | 0.0095   |
| 725 | PLA2G6        | ENSG00000184381 | 22:38120909-38123094:-      | 0.19047628  | 0.056910674      | 0.049719 |
| 726 | PLA2G6        | ENSG00000184381 | 22:38123258-38126370:-      | 0.2222232   | 0.059829168      | 0.03251  |
| 727 | PLA2G6        | ENSG00000184381 | 22:38126449-38129453:-      | 0.5555556   | 0.105263307      | 0.005035 |
| 728 | PLCB4         | ENSG00000101333 | 20:9473365-9478920:+        | 0.26315806  | 0.044117818      | 0.04084  |
| 729 | PLD2          | ENSG00000129219 | 17:4809205-4809297:+        | 0.14864879  | 0.014524395      | 0.022998 |
| 730 | PLD2          | ENSG00000129219 | 17:4809363-4809492:+        | 0.18032802  | 0.017060395      | 0.021143 |
| 731 | PLD2          | ENSG00000129219 | 17:4817055-4817145:+        | 0.19718322  | 0.031915016      | 0.024931 |
| 732 | PLD2          | ENSG00000129219 | 17:4818385-4818493:+        | 0.25210097  | 0.030075293      | 0.005007 |
| 733 | PLOD3         | ENSG00000106397 | 7:101210161-101210330:-     | 0.2142859   | 0.039604109      | 0.039177 |
| 734 | PLRG1         | ENSG00000171566 | 4:154536744-154537285:-     | 0.12068968  | 0.056179809      | 0.032259 |

| S/N | Gene Affected | ENSEMBL_ID      | Position of retained intron | IR ratio AD | IR ratio Control | p-value  |
|-----|---------------|-----------------|-----------------------------|-------------|------------------|----------|
| 735 | PLXNB1        | ENSG00000164050 | 3:48410558-48410867:-       | 0.10580208  | 0.036363686      | 0.026313 |
| 736 | PLXNB1        | ENSG00000164050 | 3:48412009-48412237:-       | 0.13404509  | 0.060344856      | 0.007987 |
| 737 | PLXNB1        | ENSG00000164050 | 3:48415347-48415582:-       | 0.18750004  | 0.075581458      | 0.031875 |
| 738 | PLXNB3        | ENSG00000198753 | X:153774344-153774419:+     | 0.11355321  | 0.011313741      | 0.018324 |
| 739 | PLXNB3        | ENSG00000198753 | X:153777688-153777947:+     | 0.23513878  | 0.085889647      | 0.021695 |
| 740 | PLXND1        | ENSG00000004399 | 3:129567805-129569842:-     | 0.36363646  | 0.112676203      | 0.042642 |
| 741 | PMPCB         | ENSG00000105819 | 7:103312131-103312206:+     | 0.51972557  | 0.208151422      | 1.61E-05 |
| 742 | PNKP          | ENSG00000039650 | 19:49862463-49862537:-      | 0.13333346  | 0.010967405      | 0.014073 |
| 743 | PNPLA6        | ENSG00000032444 | 19:7542067-7542560:+        | 0.44102572  | 0.137614793      | 0.012762 |
| 744 | PNPLA6        | ENSG00000032444 | 19:7557284-7558849:+        | 0.12142859  | 0.037444959      | 0.000636 |
| 745 | POLI          | ENSG00000101751 | 18:54271485-54273925:+      | 0.12987026  | 0.017913408      | 0.048376 |
| 746 | POLR2B        | ENSG00000047315 | 4:57023580-57023661:+       | 0.15883672  | 0.064377725      | 0.012485 |
| 747 | POLR2H        | ENSG00000163882 | 3:184363565-184364965:+     | 0.25339372  | 0.083682079      | 0.009974 |
| 748 | POLR2I        | ENSG00000105258 | 19:36114412-36114658:-      | 0.10777629  | 0.040332182      | 0.009894 |
| 749 | PORCN         | ENSG00000102312 | X:48514141-48514239:+       | 0.31111127  | 0.007457085      | 0.000342 |
| 750 | PORCN         | ENSG00000102312 | X:48514365-48514524:+       | 0.10256421  | 0.010435002      | 0.021616 |
| 751 | PPARD         | ENSG00000112033 | 6:35421958-35423945:+       | 0.1610739   | 0.04624285       | 0.026784 |
| 752 | PPP1R12C      | ENSG00000125503 | 19:55094798-55095290:-      | 0.15492961  | 0.064516169      | 0.013699 |
| 753 | PPP1R21       | ENSG00000162869 | 2:48505596-48507268:+       | 0.22277234  | 0.073275939      | 0.018254 |
| 754 | PPP1R37       | ENSG00000104866 | 19:45146049-45146389:+      | 0.10256417  | 0.014285765      | 0.004714 |
| 755 | PPP1R3F       | ENSG00000049769 | X:49282063-49285833:+       | 0.17910453  | 0.038567543      | 0.001307 |
| 756 | PPP2R2B       | ENSG00000156475 | 5:147081136-147081256:-     | 0.15789482  | 0.027027121      | 0.016538 |
| 757 | PPP5C         | ENSG0000011485  | 19:46376574-46383410:+      | 0.12918665  | 0.04558409       | 0.017949 |
| 758 | PPP6R1        | ENSG00000105063 | 19:55241391-55241476:-      | 0.18954258  | 0.016304421      | 0.001706 |
| 759 | PPP6R2        | ENSG00000100239 | 22:50441026-50443865:+      | 0.38095242  | 0.142857204      | 0.003365 |
| 760 | PPP6R2        | ENSG00000100239 | 22:50444117-50444198:+      | 0.16450221  | 0.038167988      | 0.002227 |
| 761 | PPP6R2        | ENSG00000100239 | 22:50436452-50436987:+      | 0.17213121  | 0.053030377      | 0.028367 |
| 762 | PPP6R2        | ENSG00000100239 | 22:50436452-50437505:+      | 0.2395834   | 0.042682993      | 0.001504 |
| 763 | PPP6R2        | ENSG00000100239 | 22:50437068-50437505:+      | 0.13500005  | 0.043715905      | 0.02505  |
| 764 | PQBP1         | ENSG00000102103 | X:48902517-48902731:+       | 0.13390316  | 0.057569332      | 0.018197 |
| 765 | PRAF2         | ENSG00000243279 | X:49072650-49073808:-       | 0.10833341  | 0.030172479      | 0.042798 |
| 766 | PRKCD         | ENSG00000163932 | 3:53181732-53183120:+       | 0.11320769  | 0.009108524      | 0.01536  |
| 767 | PRKCSH        | ENSG00000130175 | 19:11447789-11448221:+      | 0.28745647  | 0.103053474      | 0.000299 |
| 768 | PRKDC         | ENSG00000253729 | 8:47778660-47778727:-       | 0.16525433  | 0.046025198      | 0.037341 |
| 769 | PRKRA         | ENSG00000180228 | 2:178444500-178447504:-     | 0.10232563  | 0.036809861      | 0.034025 |
| 770 | PRMT1         | ENSG00000126457 | 19:49686726-49688161:+      | 0.18683654  | 0.038397352      | 8.02E-07 |
| 771 | PRMT2         | ENSG00000160310 | 21:46649739-46658744:+      | 0.13967614  | 0.054919944      | 0.008636 |
| 772 | PRPF31        | ENSG00000105618 | 19:54129185-54129271:+      | 0.18627455  | 0.07657663       | 0.025885 |
| 773 | PRRT1         | ENSG00000204314 | 6:32149722-32150367:-       | 0.10126594  | 0.01117326       | 0.021538 |
| 774 | PRUNE2        | ENSG00000106772 | 9:76614600-76619339:-       | 0.51401874  | 0.091811544      | 0.000992 |
| 775 | PRUNE2        | ENSG00000106772 | 9:76619387-76624451:-       | 0.45205484  | 0.112211335      | 0.002867 |
| 776 | PRUNE2        | ENSG00000106772 | 9:76624490-76629191:-       | 0.2285715   | 0.049505025      | 0.004455 |
| 777 | PRUNE2        | ENSG00000106772 | 9:76637549-76638185:-       | 0.12605049  | 0.021951271      | 0.003137 |
| 778 | PRUNE2        | ENSG00000106772 | 9:76638288-76641971:-       | 0.16374276  | 0.040000118      | 0.048066 |
| 779 | PRUNE2        | ENSG00000106772 | 9:76638288-76644738:-       | 0.16279081  | 0.004299232      | 0.000432 |
| 780 | PSMB10        | ENSG00000205220 | 16:67934948-67935419:-      | 0.14176248  | 0.046296333      | 0.00433  |
| 781 | PSMB8         | ENSG00000204264 | 6:32841735-32842133:-       | 0.11176478  | 0.02797211       | 0.046752 |
| 782 | PSMC3IP       | ENSG00000131470 | 17:42573364-42573477:-      | 0.00627073  | 0.116666942      | 0.009521 |
| 783 | PSMD11        | ENSG00000108671 | 17:32477583-32479250:+      | 0.11881191  | 0.049079794      | 0.024957 |

| S/N | Gene Affected | ENSEMBL_ID      | Position of retained intron | IR ratio AD | IR ratio Control | p-value  |
|-----|---------------|-----------------|-----------------------------|-------------|------------------|----------|
| 784 | PSMD5         | ENSG00000095261 | 9:120821464-120824493:-     | 0.18181824  | 0.067114166      | 0.042012 |
| 785 | PSMD6         | ENSG00000163636 | 3:64022523-64023274:-       | 0.23888895  | 0.057471335      | 0.00369  |
| 786 | PSMG4         | ENSG00000180822 | 6:3263759-3267590:+         | 0.30188687  | 0.048780573      | 0.002312 |
| 787 | PTCD3         | ENSG00000132300 | 2:86136562-86136981:+       | 0.08125002  | 0.167647112      | 0.022425 |
| 788 | PTGDS         | ENSG00000107317 | 9:136979299-136979945:+     | 0.25297969  | 0.126837716      | 0.022515 |
| 789 | PTH1R         | ENSG00000160801 | 3:46901480-46901765:+       | 0.35576934  | 0.094736986      | 0.027222 |
| 790 | PTH1R         | ENSG00000160801 | 3:46901860-46902525:+       | 0.28846167  | 0.057142989      | 0.017499 |
| 791 | PTK2          | ENSG00000169398 | 8:140669735-140674297:-     | 0.29646024  | 0.125926023      | 0.039166 |
| 792 | PTOV1         | ENSG00000104960 | 19:49855077-49856974:+      | 0.31258114  | 0.114441526      | 0.021437 |
| 793 | PTPRK         | ENSG00000152894 | 6:127998904-128005083:-     | 0.05586598  | 0.220779358      | 0.011417 |
| 794 | PTPRK         | ENSG00000152894 | 6:128003232-128005083:-     | 0.10606073  | 0.020958155      | 0.036652 |
| 795 | PTPRN         | ENSG00000054356 | 2:219300977-219301587:-     | 0.11049732  | 0.019230831      | 0.011342 |
| 796 | QARS          | ENSG00000172053 | 3:49099253-49099343:-       | 0.16587687  | 0.028846231      | 0.008001 |
| 797 | QARS          | ENSG00000172053 | 3:49099431-49099509:-       | 0.10429454  | 0.027397318      | 0.026179 |
| 798 | QARS          | ENSG00000172053 | 3:49099647-49099760:-       | 0.19580427  | 0.053921645      | 0.01531  |
| 799 | RAB24         | ENSG00000169228 | 5:177302178-177302396:-     | 0.5978261   | 0.287128776      | 0.002443 |
| 800 | RAB3GAP1      | ENSG00000115839 | 2:135167713-135168544:+     | 0.20338992  | 0.06472503       | 0.049861 |
| 801 | RAB40B        | ENSG00000141542 | 17:82658134-82658490:-      | 0.14285719  | 0.034168605      | 0.001392 |
| 802 | RAD50         | ENSG00000113522 | 5:132609209-132609282:+     | 0.13953496  | 0.038596563      | 0.024687 |
| 803 | RAD51D        | ENSG00000185379 | 17:35103324-35103453:-      | 0.107143    | 0.013605128      | 0.047701 |
| 804 | RAD54B        | ENSG00000197275 | 8:94378380-94378567:-       | 0.16216243  | 0.015328446      | 0.043618 |
| 805 | RAE1          | ENSG00000101146 | 20:57373581-57373662:+      | 0.12380957  | 0.014492794      | 0.000467 |
| 806 | RAF1          | ENSG00000132155 | 3:12584657-12584846:-       | 0.12181823  | 0.027472569      | 0.002373 |
| 807 | RALGPS1       | ENSG00000136828 | 9:127214842-127218739:+     | 0.60714292  | 0.238095402      | 0.048026 |
| 808 | RANBP10       | ENSG00000141084 | 16:67729484-67729679:-      | 0.13157915  | 0.014914148      | 0.047255 |
| 809 | RANBP9        | ENSG0000010017  | 6:13632521-13634430:-       | 0.13725493  | 0.042553225      | 0.001624 |
| 810 | RBBP7         | ENSG00000102054 | X:16852628-16852748:-       | 0.12980772  | 0.06368334       | 0.035452 |
| 811 | RBBP7         | ENSG00000102054 | X:16852875-16853681:-       | 0.14634149  | 0.059183702      | 0.003956 |
| 812 | RBFOX2        | ENSG00000100320 | 22:35744249-35745922:-      | 0.10294128  | 0.020618625      | 0.036812 |
| 813 | RBM10         | ENSG00000182872 | X:47180037-47180211:+       | 0.29577476  | 0.061538607      | 0.024909 |
| 814 | RBM10         | ENSG00000182872 | X:47180506-47181214:+       | 0.23308276  | 0.051094959      | 0.002928 |
| 815 | RBM3          | ENSG00000102317 | X:48577109-48577464:+       | 0.38976383  | 0.060773555      | 5.99E-05 |
| 816 | RBM33         | ENSG00000184863 | 7:155774647-155774992:+     | 0.1413045   | 0.017335567      | 0.043841 |
| 817 | RBM5          | ENSG00000003756 | 3:50110770-50113382:+       | 0.2509579   | 0.121134088      | 0.040748 |
| 818 | RBM5          | ENSG00000003756 | 3:50106864-50107481:+       | 0.19101128  | 0.058139587      | 0.004309 |
| 819 | RCHY1         | ENSG00000163743 | 4:75490701-75491610:-       | 0.1726619   | 0.059190072      | 0.004238 |
| 820 | RCHY1         | ENSG00000163743 | 4:75491637-75491723:-       | 0.14028782  | 0.054380715      | 0.027042 |
| 821 | RELL2         | ENSG00000164620 | 5:141639649-141639919:+     | 0.39500005  | 0.109422578      | 0.001808 |
| 822 | RELL2         | ENSG00000164620 | 5:141640295-141640411:+     | 0.3650794   | 0.129629703      | 0.004511 |
| 823 | RELL2         | ENSG00000164620 | 5:141640445-141640670:+     | 0.46892659  | 0.096774262      | 4.99E-05 |
| 824 | RELN          | ENSG00000189056 | 7:103472908-103478388:-     | 0.4047621   | 0.044776339      | 0.022434 |
| 825 | RELN          | ENSG00000189056 | 7:103478394-103482872:-     | 0.20833371  | 0.00919711       | 0.023395 |
| 826 | RENBP         | ENSG00000102032 | X:153941653-153941949:-     | 0.17567582  | 0.013779558      | 0.013503 |
| 827 | RGS12         | ENSG00000159788 | 4:3417541-3420641:+         | 0.4536083   | 0.18487407       | 0.039938 |
| 828 | RHPN1         | ENSG00000158106 | 8:143379078-143379314:+     | 0.26605514  | 0.052238908      | 0.008269 |
| 829 | RHPN1         | ENSG00000158106 | 8:143380783-143381267:+     | 0.37931042  | 0.125541258      | 0.025578 |
| 830 | RHPN1         | ENSG00000158106 | 8:143381344-143381571:+     | 0.44134084  | 0.148305201      | 0.01227  |
| 831 | RIOK3         | ENSG00000101782 | 18:23477086-23477178:+      | 0.33714291  | 0.159793901      | 0.049887 |
| 832 | RIPPLY2       | ENSG00000203877 | 6:83854161-83857241:+       | 0.19230776  | 0.057613247      | 0.022292 |

| S/N | Gene Affected | ENSEMBL_ID      | Position of retained intron | IR ratio AD | IR ratio Control | p-value  |
|-----|---------------|-----------------|-----------------------------|-------------|------------------|----------|
| 833 | RNF123        | ENSG00000164068 | 3:49713587-49713737:+       | 0.12328787  | 0.009511576      | 0.026929 |
| 834 | RNF123        | ENSG00000164068 | 3:49713825-49713909:+       | 0.12500013  | 0.012795297      | 0.023972 |
| 835 | RNF123        | ENSG00000164068 | 3:49704756-49704983:+       | 0.21153865  | 0.015805966      | 0.015222 |
| 836 | RNF126        | ENSG00000070423 | 19:650296-651610:-          | 0.27350435  | 0.085526413      | 0.02273  |
| 837 | RNF213        | ENSG00000173821 | 17:80354166-80354440:+      | 0.02857156  | 0.210526537      | 0.029211 |
| 838 | RNF216P1      | ENSG00000196204 | 7:4995582-4996609:+         | 0.1935486   | 0.012262749      | 0.010744 |
| 839 | RNF25         | ENSG00000163481 | 2:218668146-218668238:-     | 0.17241388  | 0.050633001      | 0.040791 |
| 840 | RNMT          | ENSG00000101654 | 18:13754147-13759941:+      | 0.2000001   | 0.059259362      | 0.049469 |
| 841 | RP9P          | ENSG00000205763 | 7:32917542-32918310:-       | 0.32758628  | 0.100840441      | 0.018872 |
| 842 | RPGR          | ENSG00000156313 | X:38276772-38290958:-       | 0.29411776  | 0.069444586      | 0.031398 |
| 843 | RPL34         | ENSG00000109475 | 4:108625253-108630020:+     | 0.07377057  | 0.227848249      | 0.042167 |
| 844 | RPN2          | ENSG00000118705 | 20:37236709-37238401:+      | 0.17142867  | 0.050000101      | 0.046109 |
| 845 | RPS6KB1       | ENSG00000108443 | 17:59931722-59934169:+      | 0.20535723  | 0.038835054      | 0.015342 |
| 846 | RPS6KB1       | ENSG00000108443 | 17:59934260-59934433:+      | 0.20833341  | 0.045454647      | 0.018556 |
| 847 | RPS6KB1       | ENSG00000108443 | 17:59934524-59935192:+      | 0.36486497  | 0.109091069      | 0.048942 |
| 848 | RPUSD3        | ENSG00000156990 | 3:9839171-9840183:-         | 0.17777787  | 0.046666756      | 0.031612 |
| 849 | RPUSD3        | ENSG00000156990 | 3:9840307-9840531:-         | 0.17567576  | 0.043478346      | 0.026585 |
| 850 | RPUSD3        | ENSG00000156990 | 3:9840616-9840697:-         | 0.18823539  | 0.042944876      | 0.021618 |
| 851 | RRAGB         | ENSG00000083750 | X:55757331-55758245:+       | 0.1854305   | 0.056074809      | 0.001721 |
| 852 | RRP1          | ENSG00000160214 | 21:43802387-43803511:+      | 0.24615391  | 0.089172057      | 0.029809 |
| 853 | RSBN1L        | ENSG00000187257 | 7:77778446-77778529:+       | 0.20270277  | 0.060000095      | 0.032335 |
| 854 | RTEL1         | ENSG00000258366 | 20:63693283-63694371:+      | 0.16279081  | 0.028169151      | 0.046866 |
| 855 | RTEL1         | ENSG00000258366 | 20:63694488-63694740:+      | 0.3372094   | 0.059701625      | 0.009224 |
| 856 | RTEL1         | ENSG00000258366 | 20:63695221-63695327:+      | 0.18965527  | 0.042857277      | 0.048726 |
| 857 | RTEL1         | ENSG00000258366 | 20:63688605-63689054:+      | 0.55813968  | 0.125000255      | 0.044465 |
| 858 | RTEL1         | ENSG00000258366 | 20:63691837-63692804:+      | 0.20779232  | 0.032258212      | 0.031436 |
| 859 | RTKN          | ENSG00000114993 | 2:74427273-74427423:-       | 0.19910017  | 0.084210587      | 0.027427 |
| 860 | RTKN          | ENSG00000114993 | 2:74428737-74428847:-       | 0.13151936  | 0.025974096      | 0.013344 |
| 861 | RUBCN         | ENSG00000145016 | 3:197695981-197696953:-     | 0.11214962  | 0.020408267      | 0.04927  |
| 862 | RUBCN         | ENSG00000145016 | 3:197697049-197699186:-     | 0.42553202  | 0.065934221      | 0.008614 |
| 863 | RUBCN         | ENSG00000145016 | 3:197699231-197700612:-     | 0.3061226   | 0.027523071      | 0.007245 |
| 864 | SAFB          | ENSG00000160633 | 19:5648043-5648988:+        | 0.23192023  | 0.122715452      | 0.035019 |
| 865 | SAFB          | ENSG00000160633 | 19:5664439-5667045:+        | 0.11046515  | 0.050473223      | 0.041937 |
| 866 | SAFB          | ENSG00000160633 | 19:5667450-5667819:+        | 0.14805199  | 0.04336739       | 0.003667 |
| 867 | SAFB2         | ENSG00000130254 | 19:5590408-5591747:-        | 0.16027879  | 0.046729029      | 0.009938 |
| 868 | SAFB2         | ENSG00000130254 | 19:5592887-5593890:-        | 0.12640453  | 0.033333377      | 0.004184 |
| 869 | SAMD14        | ENSG00000167100 | 17:50116090-50117406:-      | 0.17307704  | 0.042553286      | 0.042658 |
| 870 | SAT2          | ENSG00000141504 | 17:7626793-7626942:-        | 0.3146552   | 0.155594452      | 0.007306 |
| 871 | SATB2         | ENSG00000119042 | 2:199456096-199457338:-     | 0.18181852  | 0.014521698      | 0.042901 |
| 872 | SBF1          | ENSG00000100241 | 22:50456673-50459254:-      | 0.11200009  | 0.028688598      | 0.042317 |
| 873 | SBF1          | ENSG00000100241 | 22:50459666-50459951:-      | 0.11764711  | 0.043165521      | 0.038331 |
| 874 | SBF1          | ENSG00000100241 | 22:50460712-50461158:-      | 0.12903231  | 0.016877687      | 0.001435 |
| 875 | SCRIB         | ENSG00000180900 | 8:143791440-143791665:-     | 0.3161765   | 0.138888948      | 0.01381  |
| 876 | SCRIB         | ENSG00000180900 | 8:143791740-143791875:-     | 0.25443792  | 0.071428648      | 0.007493 |
| 877 | SCRN2         | ENSG00000141295 | 17:47838450-47838530:-      | 0.19540239  | 0.040000095      | 0.01732  |
| 878 | SDAD1         | ENSG00000198301 | 4:75973391-75974075:-       | 0.12871296  | 0.022222286      | 0.010879 |
| 879 | SEMA3B        | ENSG0000012171  | 3:50274934-50275011:+       | 0.17910453  | 0.070512884      | 0.03035  |
| 880 | SEMA6B        | ENSG00000167680 | 19:4552639-4554387:-        | 0.12745103  | 0.041095934      | 0.012665 |
| 881 | SEPT7P2       | ENSG00000214765 | 7:45728313-45728831:-       | 0.11764723  | 0.013795587      | 0.045026 |

| S/N | Gene Affected | ENSEMBL_ID      | Position of retained intron | IR ratio AD | IR ratio Control | p-value  |
|-----|---------------|-----------------|-----------------------------|-------------|------------------|----------|
| 882 | SF3A2         | ENSG00000104897 | 19:2245555-2246752:+        | 0.15458941  | 0.069565265      | 0.042109 |
| 883 | SF3A2         | ENSG00000104897 | 19:2246802-2246881:+        | 0.16521743  | 0.062992173      | 0.01538  |
| 884 | SFT2D1        | ENSG00000198818 | 6:166331407-166342418:-     | 0.11111134  | 0.008759118      | 0.029164 |
| 885 | SGCE          | ENSG00000127990 | 7:94585515-94587777:-       | 0.21031752  | 0.082914657      | 0.040827 |
| 886 | SGSM2         | ENSG00000141258 | 17:2362905-2362988:+        | 0.19718318  | 0.056497263      | 0.026181 |
| 887 | SGSM3         | ENSG00000100359 | 22:40406662-40407016:+      | 0.20754722  | 0.076923139      | 0.017993 |
| 888 | SGSM3         | ENSG00000100359 | 22:40408120-40408276:+      | 0.13600006  | 0.031802176      | 0.007462 |
| 889 | SGSM3         | ENSG00000100359 | 22:40409018-40409249:+      | 0.43598619  | 0.240131657      | 0.047806 |
| 890 | SGSM3         | ENSG00000100359 | 22:40400813-40402138:+      | 0.27868864  | 0.046875146      | 0.019952 |
| 891 | SGSM3         | ENSG00000100359 | 22:40401675-40402138:+      | 0.13173658  | 0.012244944      | 0.000596 |
| 892 | SGSM3         | ENSG00000100359 | 22:40409525-40409681:+      | 0.22006475  | 0.09383382       | 0.006096 |
| 893 | SGTA          | ENSG00000104969 | 19:2757782-2759256:-        | 0.15776701  | 0.077889482      | 0.023462 |
| 894 | SGTA          | ENSG00000104969 | 19:2759294-2761459:-        | 0.13597737  | 0.061764744      | 0.029196 |
| 895 | SH3GLB2       | ENSG00000148341 | 9:129010209-129010669:-     | 0.24458209  | 0.074902796      | 0.003991 |
| 896 | SH3GLB2       | ENSG00000148341 | 9:129010693-129014410:-     | 0.32624119  | 0.119632021      | 0.033307 |
| 897 | SHANK3        | ENSG00000251322 | 22:50706152-50711614:+      | 0.11764712  | 0.037558747      | 0.041152 |
| 898 | SHKBP1        | ENSG00000160410 | 19:40578212-40578461:+      | 0.25000007  | 0.060606185      | 0.025288 |
| 899 | SHKBP1        | ENSG00000160410 | 19:40590422-40590729:+      | 0.40000009  | 0.11111126       | 0.027472 |
| 900 | SHMT1         | ENSG00000176974 | 17:18330671-18333165:-      | 0.29090919  | 0.059701625      | 0.019395 |
| 901 | SHMT1         | ENSG00000176974 | 17:18333288-18335558:-      | 0.18867937  | 0.017060385      | 0.013798 |
| 902 | SIN3B         | ENSG00000127511 | 19:16871398-16876054:+      | 0.19767448  | 0.074561476      | 0.034585 |
| 903 | SKIV2L        | ENSG00000204351 | 6:31969420-31969514:+       | 0.4497817   | 0.220930308      | 0.025474 |
| 904 | SLC12A9       | ENSG00000146828 | 7:100861262-100861391:+     | 0.42281888  | 0.148148277      | 0.032859 |
| 905 | SLC20A1       | ENSG00000144136 | 2:112652798-112657121:+     | 0.22222231  | 0.070270373      | 0.041637 |
| 906 | SLC22A23      | ENSG00000137266 | 6:3298218-3323833:-         | 0.19540238  | 0.053191588      | 0.034355 |
| 907 | SLC25A27      | ENSG00000153291 | 6:46653298-46655842:+       | 0.72789118  | 0.290909213      | 0.010841 |
| 908 | SLC25A27      | ENSG00000153291 | 6:46671228-46676382:+       | 0.46391758  | 0.168421206      | 0.03626  |
| 909 | SLC25A27      | ENSG00000153291 | 6:46656034-46658961:+       | 0.48704666  | 0.094339675      | 2.38E-06 |
| 910 | SLC25A32      | ENSG00000164933 | 8:103403324-103404775:-     | 0.22093032  | 0.068702386      | 0.038326 |
| 911 | SLC25A38      | ENSG00000144659 | 3:39392021-39394409:+       | 0.04232812  | 0.312883759      | 0.002655 |
| 912 | SLC25A42      | ENSG00000181035 | 19:19104938-19105560:+      | 0.10909106  | 0.009197061      | 0.017487 |
| 913 | SLC25A46      | ENSG00000164209 | 5:110739402-110742046:+     | 0.33962282  | 0.045454737      | 0.022482 |
| 914 | SLC26A11      | ENSG00000181045 | 17:80221794-80222654:+      | 0.12121234  | 0.009681124      | 0.026063 |
| 915 | SLC26A11      | ENSG00000181045 | 17:80223337-80225836:+      | 0.27848109  | 0.078947468      | 0.020564 |
| 916 | SLC26A11      | ENSG00000181045 | 17:80248674-80249153:+      | 0.24657544  | 0.075471814      | 0.04774  |
| 917 | SLC26A11      | ENSG00000181045 | 17:80249287-80251328:+      | 0.31034488  | 0.090277857      | 0.006572 |
| 918 | SLC27A1       | ENSG00000130304 | 19:17501419-17504454:+      | 0.20858901  | 0.072463839      | 0.023194 |
| 919 | SLC27A4       | ENSG00000167114 | 9:128355796-128360333:+     | 0.13017756  | 0.043478313      | 0.025505 |
| 920 | SLC30A3       | ENSG00000115194 | 2:27258058-27258160:-       | 0.19230795  | 0.014084654      | 0.03568  |
| 921 | SLC4A2        | ENSG00000164889 | 7:151071605-151071688:+     | 0.1120001   | 0.015576877      | 0.042764 |
| 922 | SLC6A1        | ENSG00000157103 | 3:10992929-11015671:+       | 0.16666675  | 0.02898559       | 0.011407 |
| 923 | SLC6A1        | ENSG00000157103 | 3:11029352-11031176:+       | 0.11212126  | 0.042357331      | 0.046772 |
| 924 | SLC6A8        | ENSG00000130821 | X:153688836-153690374:+     | 0.16062182  | 0.049792591      | 0.013773 |
| 925 | SLC7A6        | ENSG00000103064 | 16:68296513-68296626:+      | 0.21739151  | 0.012541451      | 0.00813  |
| 926 | SLMAP         | ENSG00000163681 | 3:57923023-57927295:+       | 0.27272744  | 0.050000176      | 0.048737 |
| 927 | SMARCA1       | ENSG00000102038 | X:129447233-129448332:-     | 0.24018479  | 0.116232518      | 0.022389 |
| 928 | SMARCD2       | ENSG00000108604 | 17:63832991-63833068:-      | 0.32828287  | 0.155555634      | 0.045779 |
| 929 | SMARCD3       | ENSG00000082014 | 7:151240247-151240424:-     | 0.14136129  | 0.066384231      | 0.045745 |
| 930 | SMARCE1       | ENSG00000073584 | 17:40631693-40632194:-      | 0.12865501  | 0.056140396      | 0.039222 |

| S/N | Gene Affected | ENSEMBL_ID      | Position of retained intron | IR ratio AD | IR ratio Control | p-value  |
|-----|---------------|-----------------|-----------------------------|-------------|------------------|----------|
| 931 | SMG9          | ENSG00000105771 | 19:43734495-43737596:-      | 0.50862072  | 0.151898792      | 9.20E-05 |
| 932 | SMG9          | ENSG00000105771 | 19:43737682-43738121:-      | 0.16455701  | 0.048888942      | 0.008166 |
| 933 | SMURF1        | ENSG00000198742 | 7:99049709-99051356:-       | 0.30000014  | 0.027559067      | 0.014778 |
| 934 | SMURF1        | ENSG00000198742 | 7:99052446-99054789:-       | 0.16279084  | 0.019541893      | 0.034872 |
| 935 | SMURF1        | ENSG00000198742 | 7:99047882-99049562:-       | 0.26666676  | 0.05952393       | 0.020979 |
| 936 | SMURF1        | ENSG00000198742 | 7:99057270-99057417:-       | 0.12765972  | 0.01535435       | 0.036861 |
| 937 | SMURF1        | ENSG00000198742 | 7:99060707-99061798:-       | 0.12658246  | 0.012833112      | 0.034131 |
| 938 | SON           | ENSG00000159140 | 21:33569087-33573307:+      | 0.17211057  | 0.091787469      | 0.015893 |
| 939 | SOX10         | ENSG00000100146 | 22:37978135-37983356:-      | 0.11940303  | 0.042328101      | 0.03828  |
| 940 | SPAG7         | ENSG00000091640 | 17:4959643-4959759:-        | 0.13993178  | 0.061224535      | 0.033053 |
| 941 | SPATA20       | ENSG00000006282 | 17:50551679-50551968:+      | 0.45355195  | 0.164383641      | 0.00416  |
| 942 | SPG7          | ENSG00000197912 | 16:89530808-89531903:+      | 0.11827962  | 0.040816383      | 0.040416 |
| 943 | SPG7          | ENSG00000197912 | 16:89548113-89550493:+      | 0.13398696  | 0.053846195      | 0.020158 |
| 944 | SPHK2         | ENSG00000063176 | 19:48626362-48627691:+      | 0.27173921  | 0.058823636      | 0.011475 |
| 945 | SPPL2B        | ENSG00000005206 | 19:2344424-2344552:+        | 0.11409404  | 0.007902983      | 0.005408 |
| 946 | SPTBN4        | ENSG00000160460 | 19:40554646-40556083:+      | 0.51798569  | 0.154929806      | 0.041529 |
| 947 | SPTBN4        | ENSG00000160460 | 19:40566359-40567662:+      | 0.25225239  | 0.056680329      | 0.044158 |
| 948 | SRCIN1        | ENSG00000277363 | 17:38543969-38548556:-      | 0.58928581  | 0.081081273      | 0.006424 |
| 949 | SREBF2        | ENSG00000198911 | 22:41903155-41904862:+      | 0.12349401  | 0.024714856      | 0.000121 |
| 950 | SREBF2        | ENSG00000198911 | 22:41904974-41905439:+      | 0.11894277  | 0.022099482      | 0.000711 |
| 951 | SREBF2        | ENSG00000198911 | 22:41900498-41902969:+      | 0.10840712  | 0.014377023      | 4.87E-05 |
| 952 | SRRT          | ENSG00000087087 | 7:100882241-100884069:+     | 0.41052635  | 0.211678909      | 0.047368 |
| 953 | SRSF3         | ENSG00000112081 | 6:36598983-36601151:+       | 0.24757283  | 0.11282847       | 0.001341 |
| 954 | SSB           | ENSG00000138385 | 2:169806892-169806970:+     | 0.10682113  | 0.039196003      | 0.001488 |
| 955 | SSBP2         | ENSG00000145687 | 5:81442723-81446867:-       | 0.19871801  | 0.036649279      | 0.002286 |
| 956 | SSBP2         | ENSG00000145687 | 5:81446922-81448789:-       | 0.12751684  | 0.028571488      | 0.012294 |
| 957 | STAT5B        | ENSG00000173757 | 17:42201864-42202339:-      | 0.18674704  | 0.045161353      | 0.005367 |
| 958 | STAT5B        | ENSG00000173757 | 17:42217464-42218150:-      | 0.1823205   | 0.065476259      | 0.030008 |
| 959 | STIM2         | ENSG00000109689 | 4:27007700-27008427:+       | 0.11842115  | 0.006416555      | 0.002701 |
| 960 | STK11         | ENSG00000118046 | 19:1226663-1227592:+        | 0.10526321  | 0.027173973      | 0.026048 |
| 961 | STK19         | ENSG00000204344 | 6:31979553-31980450:+       | 0.52000004  | 0.227272835      | 0.03006  |
| 962 | STRN4         | ENSG00000090372 | 19:46720771-46721985:-      | 0.11960137  | 0.044673583      | 0.022609 |
| 963 | STRN4         | ENSG00000090372 | 19:46722072-46722241:-      | 0.10593224  | 0.033834628      | 0.015449 |
| 964 | SUMF2         | ENSG00000129103 | 7:56078186-56078363:+       | 0.18333343  | 0.039370168      | 0.015104 |
| 965 | SUN2          | ENSG00000100242 | 22:38740432-38741006:-      | 0.23154124  | 0.136439301      | 0.025583 |
| 966 | SUPT5H        | ENSG00000196235 | 19:39457740-39458817:+      | 0.17708343  | 0.018181886      | 0.002249 |
| 967 | SYMPK         | ENSG00000125755 | 19:45823875-45825170:-      | 0.20512825  | 0.048507511      | 0.001009 |
| 968 | SYNGR1        | ENSG00000100321 | 22:39374553-39376051:+      | 0.17283957  | 0.06329122       | 0.044715 |
| 969 | SYNGR1        | ENSG00000100321 | 22:39376197-39381695:+      | 0.15000007  | 0.030476247      | 0.004443 |
| 970 | SYNJ1         | ENSG00000159082 | 21:32673531-32676331:-      | 0.10416684  | 0.010989098      | 0.035013 |
| 971 | SYNRG         | ENSG00000275066 | 17:37538420-37539191:-      | 0.1929826   | 0.034482896      | 0.038028 |
| 972 | SYTL4         | ENSG00000102362 | X:100686781-100687066:-     | 0.19000025  | 0.009681134      | 0.008442 |
| 973 | TAB3          | ENSG00000157625 | X:30831575-30834050:-       | 0.19354859  | 0.008900388      | 0.004603 |
| 974 | TACC1         | ENSG00000147526 | 8:38838546-38840223:+       | 0.13145545  | 0.048048103      | 0.029436 |
| 975 | TACC1         | ENSG00000147526 | 8:38827288-38831124:+       | 0.30769238  | 0.075000097      | 0.008232 |
| 976 | TAF6          | ENSG00000106290 | 7:100110073-100110199:-     | 0.16956526  | 0.060000043      | 0.007548 |
| 977 | TANGO2        | ENSG00000183597 | 22:20056013-20061529:+      | 0.22058833  | 0.061947002      | 0.034821 |
| 978 | TAPBP         | ENSG00000231925 | 6:33304638-33304988:-       | 0.16071434  | 0.03535359       | 0.003753 |
| 979 | TBC1D13       | ENSG00000107021 | 9:128792574-128797054:+     | 0.30841128  | 0.093525273      | 0.014178 |

| S/N  | Gene Affected | ENSEMBL_ID      | Position of retained intron | IR ratio AD | IR ratio Control | p-value  |
|------|---------------|-----------------|-----------------------------|-------------|------------------|----------|
| 980  | TBC1D17       | ENSG00000104946 | 19:49878572-49880278:+      | 0.21052634  | 0.072115421      | 0.000829 |
| 981  | TBC1D25       | ENSG00000068354 | X:48559024-48559157:+       | 0.18918937  | 0.007357656      | 0.002363 |
| 982  | TBCD          | ENSG00000141556 | 17:82929500-82930521:+      | 0.40410964  | 0.149122909      | 0.015698 |
| 983  | TBKBP1        | ENSG00000198933 | 17:47709452-47710497:+      | 0.21794892  | 0.027272877      | 0.029079 |
| 984  | TBPL1         | ENSG00000028839 | 6:133984671-133986960:+     | 0.1164384   | 0.046875051      | 0.045583 |
| 985  | TCERG1        | ENSG00000113649 | 5:146482727-146483539:+     | 0.32298142  | 0.101382575      | 0.008696 |
| 986  | TCF25         | ENSG00000141002 | 16:89893858-89895037:+      | 0.10569109  | 0.025316487      | 0.00124  |
| 987  | TECPR1        | ENSG00000205356 | 7:98217811-98217935:-       | 0.11864423  | 0.008667798      | 0.016191 |
| 988  | TECPR1        | ENSG00000205356 | 7:98229166-98230960:-       | 0.14754112  | 0.02083345       | 0.035959 |
| 989  | TECPR1        | ENSG00000205356 | 7:98231118-98231223:-       | 0.16666685  | 0.006648486      | 0.002822 |
| 990  | TESK1         | ENSG00000107140 | 9:35606285-35606836:+       | 0.1233767   | 0.033783865      | 0.04682  |
| 991  | TESK1         | ENSG00000107140 | 9:35607409-35607581:+       | 0.26470592  | 0.060085886      | 0.000207 |
| 992  | TFEB          | ENSG00000112561 | 6:41687169-41687752:-       | 0.21120697  | 0.06422028       | 0.032403 |
| 993  | TFPT          | ENSG00000105619 | 19:54114700-54115246:-      | 0.11180129  | 0.032258114      | 0.019253 |
| 994  | THUMPD3       | ENSG00000134077 | 3:9377888-9380502:+         | 0.18867932  | 0.043103534      | 0.01604  |
| 995  | THUMPD3       | ENSG00000134077 | 3:9380618-9383198:+         | 0.46231162  | 0.139394045      | 0.005999 |
| 996  | THUMPD3       | ENSG00000134077 | 3:9383309-9384211:+         | 0.24175832  | 0.07534256       | 0.025741 |
| 997  | THUMPD3       | ENSG00000134077 | 3:9384335-9384523:+         | 0.18468475  | 0.068965595      | 0.042533 |
| 998  | TIAM2         | ENSG00000146426 | 6:155249969-155250912:+     | 0.11224499  | 0.029520369      | 0.049677 |
| 999  | TIMM21        | ENSG00000075336 | 18:74155207-74155305:+      | 0.20647777  | 0.074349492      | 0.007003 |
| 1000 | TIMM44        | ENSG00000104980 | 19:7933570-7933863:-        | 0.22727278  | 0.085106454      | 0.027701 |
| 1001 | TLE4          | ENSG00000106829 | 9:79706899-79708117:+       | 0.16733073  | 0.052631648      | 0.021349 |
| 1002 | TM9SF4        | ENSG00000101337 | 20:32150875-32155102:+      | 0.14179112  | 0.033898378      | 0.020926 |
| 1003 | TM9SF4        | ENSG00000101337 | 20:32155186-32157793:+      | 0.22302164  | 0.074324401      | 0.022453 |
| 1004 | TM9SF4        | ENSG00000101337 | 20:32158514-32159991:+      | 0.1283423   | 0.034042606      | 0.01188  |
| 1005 | TMEM120A      | ENSG00000189077 | 7:75987428-75987537:-       | 0.19127521  | 0.059360785      | 0.006007 |
| 1006 | TMEM120A      | ENSG00000189077 | 7:75987602-75987717:-       | 0.2753037   | 0.109289696      | 0.025734 |
| 1007 | TMEM120A      | ENSG00000189077 | 7:75989224-75992143:-       | 0.11000006  | 0.026455088      | 0.021167 |
| 1008 | TMEM165       | ENSG00000134851 | 4:55396396-55411613:+       | 0.19125689  | 0.070175523      | 0.048522 |
| 1009 | TMEM181       | ENSG00000146433 | 6:158631389-158631809:+     | 0.23728823  | 0.048611207      | 0.009771 |
| 1010 | TMEM184B      | ENSG00000198792 | 22:38221710-38222641:-      | 0.44692744  | 0.079602079      | 0.000349 |
| 1011 | TMEM184B      | ENSG00000198792 | 22:38222662-38224784:-      | 0.42948726  | 0.150000153      | 0.037842 |
| 1012 | TMEM214       | ENSG00000119777 | 2:27035728-27035969:+       | 0.29411773  | 0.104166781      | 0.049469 |
| 1013 | TMEM63B       | ENSG00000137216 | 6:44148945-44149858:+       | 0.26829275  | 0.063492149      | 0.00487  |
| 1014 | TMEM63B       | ENSG00000137216 | 6:44150629-44151845:+       | 0.16176478  | 0.039130501      | 0.011562 |
| 1015 | TMEM94        | ENSG00000177728 | 17:75491852-75492473:+      | 0.75268826  | 0.22580665       | 0.025529 |
| 1016 | TMEM94        | ENSG00000177728 | 17:75493102-75493490:+      | 0.52777783  | 0.184210619      | 0.004955 |
| 1017 | TNK2          | ENSG00000061938 | 3:195879175-195882050:-     | 0.10502286  | 0.027196681      | 0.001017 |
| 1018 | TNPO3         | ENSG00000064419 | 7:128955385-128957223:-     | 0.25694449  | 0.102040887      | 0.025419 |
| 1019 | TOM1L2        | ENSG00000175662 | 17:17848859-17861475:-      | 0.37681166  | 0.065292196      | 0.00119  |
| 1020 | TOMM40        | ENSG00000130204 | 19:44901310-44903029:+      | 0.17410718  | 0.041237152      | 0.000522 |
| 1021 | TOPBP1        | ENSG00000163781 | 3:133617326-133618212:-     | 0.36290331  | 0.126126251      | 0.036692 |
| 1022 | TPD52L1       | ENSG00000111907 | 6:125248383-125252021:+     | 0.39726036  | 0.067415879      | 0.007618 |
| 1023 | TPD52L1       | ENSG00000111907 | 6:125252036-125253716:+     | 0.57954549  | 0.103448401      | 0.000944 |
| 1024 | TPGS1         | ENSG00000141933 | 19:507844-518888:+          | 0.15094355  | 0.011682673      | 0.015441 |
| 1025 | TPRKB         | ENSG00000144034 | 2:73730736-73732162:-       | 0.19277115  | 0.067532539      | 0.021723 |
| 1026 | TPRN          | ENSG00000176058 | 9:137192691-137204103:-     | 0.66666674  | 0.237288328      | 0.048717 |
| 1027 | TPRN          | ENSG00000176058 | 9:137192174-137192258:-     | 0.2004718   | 0.058558657      | 0.03283  |
| 1028 | TRABD         | ENSG00000170638 | 22:50193654-50194339:+      | 0.06666674  | 0.225352263      | 0.034084 |

| S/N  | Gene Affected | ENSEMBL_ID      | Position of retained intron | IR ratio AD | IR ratio Control | p-value  |
|------|---------------|-----------------|-----------------------------|-------------|------------------|----------|
| 1029 | TRABD         | ENSG00000170638 | 22:50195040-50197240:+      | 0.06040275  | 0.233333478      | 0.013804 |
| 1030 | TRABD         | ENSG00000170638 | 22:50197351-50197448:+      | 0.07692315  | 0.317757191      | 0.006729 |
| 1031 | TRIM27        | ENSG00000204713 | 6:28909088-28911695:-       | 0.27500005  | 0.110091816      | 0.022916 |
| 1032 | TRIM28        | ENSG00000130726 | 19:58548776-58548861:+      | 0.13090132  | 0.033653878      | 0.000686 |
| 1033 | TRMT1         | ENSG00000104907 | 19:13109838-13109914:-      | 0.17692315  | 0.040000087      | 0.01816  |
| 1034 | TRRAP         | ENSG00000196367 | 7:98933402-98935578:+       | 0.21875032  | 0.021223994      | 0.049276 |
| 1035 | TSC22D3       | ENSG00000157514 | X:107715950-107716314:-     | 0.49600008  | 0.140187044      | 0.010018 |
| 1036 | TSGA10        | ENSG00000135951 | 2:99105436-99105526:-       | 0.12000019  | 0.007883207      | 0.015059 |
| 1037 | TSPAN17       | ENSG00000048140 | 5:176652913-176654894:+     | 0.25274737  | 0.068181953      | 0.044628 |
| 1038 | TSPOAP1       | ENSG00000005379 | 17:58305171-58305386:-      | 0.18471347  | 0.048611212      | 0.031232 |
| 1039 | TSPOAP1       | ENSG00000005379 | 17:58306968-58307610:-      | 0.10476196  | 0.015151557      | 0.002024 |
| 1040 | TSPOAP1       | ENSG00000005379 | 17:58320581-58322307:-      | 0.36904769  | 0.123287805      | 0.036052 |
| 1041 | TSPYL2        | ENSG00000184205 | X:53084622-53084754:+       | 0.11751158  | 0.021602204      | 0.001615 |
| 1042 | TTC19         | ENSG00000011295 | 17:16025171-16026539:+      | 0.10377364  | 0.026004769      | 0.007569 |
| 1043 | TTYH3         | ENSG00000136295 | 7:2647253-2647417:+         | 0.12962976  | 0.010967401      | 0.014775 |
| 1044 | TUBG2         | ENSG00000037042 | 17:42660707-42662972:+      | 0.47524756  | 0.136783821      | 0.000681 |
| 1045 | TUBG2         | ENSG00000037042 | 17:42663052-42663376:+      | 0.15478618  | 0.027544937      | 8.32E-06 |
| 1046 | TUBG2         | ENSG00000037042 | 17:42665562-42665677:+      | 0.23728816  | 0.086118295      | 0.001187 |
| 1047 | TUBG2         | ENSG00000037042 | 17:42659552-42659833:+      | 0.10833339  | 0.02179841       | 0.00475  |
| 1048 | U2AF2         | ENSG00000063244 | 19:55655153-55659209:+      | 0.14859443  | 0.037735905      | 0.007451 |
| 1049 | U2AF2         | ENSG00000063244 | 19:55660221-55660515:+      | 0.11405839  | 0.032934171      | 0.005539 |
| 1050 | UBA1          | ENSG00000130985 | X:47194024-47198802:+       | 0.26640931  | 0.071428633      | 0.001389 |
| 1051 | UBA3          | ENSG00000144744 | 3:69056693-69056778:-       | 0.34879408  | 0.148148184      | 0.000445 |
| 1052 | UBA5          | ENSG00000081307 | 3:132660698-132665822:+     | 0.43283588  | 0.131386981      | 0.015023 |
| 1053 | UBA5          | ENSG00000081307 | 3:132665868-132665983:+     | 0.34108536  | 0.106741702      | 0.028108 |
| 1054 | UBAP2         | ENSG00000137073 | 9:33923033-33923185:-       | 0.29268302  | 0.081081212      | 0.035564 |
| 1055 | UBAP2         | ENSG00000137073 | 9:33923293-33923378:-       | 0.16000011  | 0.026666795      | 0.040356 |
| 1056 | UBAP2         | ENSG00000137073 | 9:33923478-33923794:-       | 0.10344842  | 0.008900383      | 0.019004 |
| 1057 | UBE2O         | ENSG00000175931 | 17:76391613-76391755:-      | 0.15000012  | 0.029239865      | 0.032432 |
| 1058 | UBE2O         | ENSG00000175931 | 17:76391813-76391909:-      | 0.22330108  | 0.023952182      | 0.002764 |
| 1059 | UBE2Z         | ENSG00000159202 | 17:48908820-48910807:+      | 0.31707324  | 0.094890602      | 0.01313  |
| 1060 | UBE2Z         | ENSG00000159202 | 17:48910880-48912833:+      | 0.18627456  | 0.077868911      | 0.034178 |
| 1061 | UBR5          | ENSG00000104517 | 8:102257717-102258984:-     | 0.14542193  | 0.078378413      | 0.046586 |
| 1062 | UFD1L         | ENSG00000070010 | 22:19450744-19454748:-      | 0.315493    | 0.151515227      | 0.038256 |
| 1063 | UFSP2         | ENSG00000109775 | 4:185400478-185403493:-     | 0.11602213  | 0.047318648      | 0.018105 |
| 1064 | UFSP2         | ENSG00000109775 | 4:185418507-185418586:-     | 0.10734476  | 0.020304662      | 0.047432 |
| 1065 | UNC13A        | ENSG00000130477 | 19:17627597-17627862:-      | 0.12500015  | 0.013043561      | 0.017123 |
| 1066 | UNC13B        | ENSG00000198722 | 9:35386293-35389845:+       | 0.11428583  | 0.006342803      | 0.003942 |
| 1067 | UPF1          | ENSG00000005007 | 19:18852296-18852986:+      | 0.10204088  | 0.019607913      | 0.023798 |
| 1068 | UPF3B         | ENSG00000125351 | X:119841258-119841734:-     | 0.11464973  | 0.025906791      | 0.011981 |
| 1069 | UQCC1         | ENSG00000101019 | 20:35304069-35306665:-      | 0.1790124   | 0.054263627      | 0.012428 |
| 1070 | URM1          | ENSG00000167118 | 9:128389309-128389665:+     | 0.11217953  | 0.037940424      | 0.01857  |
| 1071 | USP16         | ENSG00000156256 | 21:29042528-29043422:+      | 0.14788736  | 0.063559374      | 0.041679 |
| 1072 | USP19         | ENSG00000172046 | 3:49117570-49117656:-       | 0.16853948  | 0.025316602      | 0.047487 |
| 1073 | USP20         | ENSG00000136878 | 9:129874756-129874828:+     | 0.14000014  | 0.014285804      | 0.017093 |
| 1074 | USP34         | ENSG00000115464 | 2:61188709-61188909:-       | 0.27655103  | 0.110056969      | 0.001578 |
| 1075 | USP34         | ENSG00000115464 | 2:61189069-61190270:-       | 0.36645965  | 0.176470628      | 0.001955 |
| 1076 | USP34         | ENSG00000115464 | 2:61190414-61190517:-       | 0.48522406  | 0.19087143       | 0.000991 |
| 1077 | UTP14A        | ENSG00000156697 | X:129906236-129907366:+     | 0.42857158  | 0.017244471      | 0.001172 |

| S/N  | Gene Affected | ENSEMBL_ID      | Position of retained intron | IR ratio AD | IR ratio Control | p-value  |
|------|---------------|-----------------|-----------------------------|-------------|------------------|----------|
| 1078 | UTP14A        | ENSG00000156697 | X:129908130-129908669:+     | 0.45070433  | 0.081632821      | 0.011428 |
| 1079 | UTP4          | ENSG00000141076 | 16:69137885-69139824:+      | 0.14285725  | 0.034482851      | 0.049213 |
| 1080 | VAMP2         | ENSG00000220205 | 17:8160871-8161472:-        | 0.10043672  | 0.013854548      | 2.59E-06 |
| 1081 | VARS          | ENSG00000204394 | 6:31782443-31782529:-       | 0.10769243  | 0.012949457      | 0.036228 |
| 1082 | VARS2         | ENSG00000137411 | 6:30921305-30921588:+       | 0.11931827  | 0.010748053      | 0.012887 |
| 1083 | VCAN          | ENSG00000038427 | 5:83580162-83580306:+       | 0.00742117  | 0.113095322      | 2.97E-05 |
| 1084 | VDAC3         | ENSG00000078668 | 8:42404924-42405370:+       | 0.13399697  | 0.063774458      | 0.042959 |
| 1085 | VEZF1         | ENSG00000136451 | 17:57974900-57979151:-      | 0.18577081  | 0.05494515       | 0.034171 |
| 1086 | VILL          | ENSG00000136059 | 3:38006252-38006448:+       | 0.43589758  | 0.096154072      | 0.048794 |
| 1087 | VPS28         | ENSG00000160948 | 8:144423922-144424040:-     | 0.1498423   | 0.050215236      | 0.000553 |
| 1088 | VPS28         | ENSG00000160948 | 8:144424268-144424717:-     | 0.11464091  | 0.033029634      | 0.000125 |
| 1089 | VPS9D1        | ENSG00000075399 | 16:89711010-89711326:-      | 0.23846163  | 0.069230876      | 0.03166  |
| 1090 | VPS9D1        | ENSG00000075399 | 16:89707954-89708426:-      | 0.41772157  | 0.137254983      | 0.004263 |
| 1091 | VWA5B2        | ENSG00000145198 | 3:184241107-184241186:+     | 0.3678162   | 0.099290956      | 0.040258 |
| 1092 | WASF1         | ENSG00000112290 | 6:110102216-110103377:-     | 0.14659692  | 0.046647307      | 0.025548 |
| 1093 | WBP1          | ENSG00000239779 | 2:74459552-74459642:+       | 0.78527613  | 0.351648499      | 0.043941 |
| 1094 | WBP2          | ENSG00000132471 | 17:75847609-75848569:-      | 0.61818183  | 0.119230887      | 0.000414 |
| 1095 | WBSCR22       | ENSG00000071462 | 7:73694050-73697604:+       | 0.21612906  | 0.071246858      | 0.000944 |
| 1096 | WDR13         | ENSG00000101940 | X:48598037-48598716:+       | 0.24381629  | 0.119617284      | 0.041481 |
| 1097 | WDR13         | ENSG00000101940 | X:48600626-48601783:+       | 0.13076926  | 0.049701828      | 0.010506 |
| 1098 | WDR18         | ENSG00000065268 | 19:990364-990851:+          | 0.52439029  | 0.148437604      | 0.003767 |
| 1099 | WDR36         | ENSG00000134987 | 5:111105360-111106056:+     | 0.15151538  | 0.014521674      | 0.035012 |
| 1100 | WDR54         | ENSG00000005448 | 2:74423982-74424874:+       | 0.28282834  | 0.114832631      | 0.049393 |
| 1101 | WDR54         | ENSG00000005448 | 2:74424975-74425074:+       | 0.28378386  | 0.101083156      | 0.045785 |
| 1102 | WDR54         | ENSG00000005448 | 2:74425237-74425416:+       | 0.20863319  | 0.044217788      | 0.0154   |
| 1103 | WDR54         | ENSG00000005448 | 2:74425491-74425569:+       | 0.22222228  | 0.054621912      | 0.004427 |
| 1104 | WDR59         | ENSG00000103091 | 16:74909657-74909821:-      | 0.79459462  | 0.428571522      | 0.033658 |
| 1105 | WDR59         | ENSG00000103091 | 16:74909917-74912197:-      | 0.73631845  | 0.330188773      | 0.01191  |
| 1106 | WDR6          | ENSG00000178252 | 3:49014116-49014209:+       | 0.66331662  | 0.366515924      | 0.035219 |
| 1107 | WDR83         | ENSG00000123154 | 19:12670285-12670562:+      | 0.26530621  | 0.080808197      | 0.038713 |
| 1108 | WDR91         | ENSG00000105875 | 7:135188545-135189343:-     | 0.26315801  | 0.043956167      | 0.013234 |
| 1109 | WDSUB1        | ENSG00000196151 | 2:159236190-159248371:-     | 0.27225136  | 0.111940381      | 0.037452 |
| 1110 | WIZ           | ENSG0000011451  | 19:15425768-15426981:-      | 0.13513522  | 0.019230868      | 0.021865 |
| 1111 | WRNIP1        | ENSG00000124535 | 6:2784403-2785006:+         | 0.14652959  | 0.075630286      | 0.037113 |
| 1112 | XAB2          | ENSG00000076924 | 19:7620446-7620546:-        | 0.13084117  | 0.045833384      | 0.023828 |
| 1113 | XAB2          | ENSG00000076924 | 19:7627440-7627727:-        | 0.10891097  | 0.004798468      | 0.001027 |
| 1114 | XPO7          | ENSG00000130227 | 8:22004030-22004994:+       | 0.13454549  | 0.05519485       | 0.028962 |
| 1115 | XRCC1         | ENSG00000073050 | 19:43552908-43552981:-      | 0.1976745   | 0.059322123      | 0.035908 |
| 1116 | YAE1D1        | ENSG00000241127 | 7:39570627-39572276:+       | 0.23770497  | 0.092307771      | 0.038347 |
| 1117 | YEATS2        | ENSG00000163872 | 3:183803335-183803986:+     | 0.25657902  | 0.096774294      | 0.048698 |
| 1118 | YEATS2        | ENSG00000163872 | 3:183804188-183806865:+     | 0.12592599  | 0.037500072      | 0.044363 |
| 1119 | YIF1B         | ENSG00000167645 | 19:38307521-38307596:-      | 0.25000004  | 0.072463821      | 0.00135  |
| 1120 | YJEFN3        | ENSG00000250067 | 19:19528991-19532631:+      | 0.36538469  | 0.088670075      | 0.010037 |
| 1121 | YWHAE         | ENSG00000108953 | 17:1345499-1347961:-        | 0.4000001   | 0.090909252      | 0.023932 |
| 1122 | ZER1          | ENSG00000160445 | 9:128735431-128739930:-     | 0.14005607  | 0.039316288      | 0.005822 |
| 1123 | ZFAND1        | ENSG00000104231 | 8:81714039-81714803:-       | 0.1136364   | 0.048710639      | 0.033773 |
| 1124 | ZFAND1        | ENSG00000104231 | 8:81714895-81714986:-       | 0.11052637  | 0.017793639      | 0.002559 |
| 1125 | ZMIZ2         | ENSG00000122515 | 7:44759460-44760424:+       | 0.24117653  | 0.103603684      | 0.049495 |
| 1126 | ZMIZ2         | ENSG00000122515 | 7:44761593-44761694:+       | 0.26294827  | 0.09138391       | 0.024364 |

| S/N  | Gene Affected | ENSEMBL_ID      | Position of retained intron | IR ratio AD | IR ratio Control | p-value  |
|------|---------------|-----------------|-----------------------------|-------------|------------------|----------|
| 1127 | ZMYM3         | ENSG00000147130 | X:71242424-71242969:-       | 0.1733334   | 0.044444523      | 0.018357 |
| 1128 | ZNF207        | ENSG0000010244  | 17:32360967-32361467:+      | 0.22981376  | 0.066326636      | 0.029407 |
| 1129 | ZNF346        | ENSG00000113761 | 5:177041870-177044388:+     | 0.12280716  | 0.014524391      | 0.037834 |
| 1130 | ZNF444        | ENSG00000167685 | 19:56158602-56159623:+      | 0.1307693   | 0.019230864      | 0.021054 |
| 1131 | ZNF526        | ENSG00000167625 | 19:42224305-42224386:+      | 0.22222253  | 0.016721942      | 0.029328 |
| 1132 | ZNF607        | ENSG00000198182 | 19:37699895-37707913:-      | 0.17857167  | 0.015766388      | 0.029943 |
| 1133 | ZNF775        | ENSG00000196456 | 7:150379392-150388421:+     | 0.16326548  | 0.01902838       | 0.037359 |
| 1134 | ZNRF1         | ENSG00000186187 | 16:75104889-75106481:+      | 0.12820518  | 0.041095939      | 0.019195 |
| 1135 | ZSCAN18       | ENSG00000121413 | 19:58087008-58087315:-      | 0.12923082  | 0.021818217      | 0.000292 |
| 1136 | ZSCAN18       | ENSG00000121413 | 19:58086266-58086905:-      | 0.26760568  | 0.067889963      | 0.000397 |
