# Supplementary material for: Increased intron retention is a post‐transcriptional signature associated with progressive aging and Alzheimer’s disease
Source: PubMed Central journal article supplement (PMC6516162; doi:10.1111/acel.12928), 2019-03-13
Supplement: ACEL-18-e12928-s010.pdf [file ACEL-18-e12928-s010.pdf]

**Table S9: DAVID functional annotation chart of differential IR genes between Control & AD frontal cortex (Emory: SRS373257)**

| <b>GOTERM_BP_DIRECT</b>                                  | <b>Count</b> | <b>%</b>  | <b>P-Value</b> | <b>Fold Enrichment</b> | <b>Benjamini value</b> |
|----------------------------------------------------------|--------------|-----------|----------------|------------------------|------------------------|
| GO:0006541~glutamine metabolic process                   | 3            | 3.7974684 | 0.0033668      | 34.03783784            | 0.811000718            |
| GO:0045333~cellular respiration                          | 3            | 3.7974684 | 0.0037108      | 32.41698842            | 0.600790221            |
| GO:0015991~ATP hydrolysis coupled proton transport       | 3            | 3.7974684 | 0.0084985      | 21.27364865            | 0.754731139            |
| GO:0009070~serine family amino acid biosynthetic process | 2            | 2.5316456 | 0.008676       | 226.9189189            | 0.659097264            |
| GO:0006406~mRNA export from nucleus                      | 4            | 5.0632911 | 0.0094302      | 9.076756757            | 0.607853808            |
| GO:0006405~RNA export from nucleus                       | 3            | 3.7974684 | 0.0238645      | 12.37739558            | 0.863121939            |
| GO:0006537~glutamate biosynthetic process                | 2            | 2.5316456 | 0.0258058      | 75.63963964            | 0.841984583            |
| GO:0006544~glycine metabolic process                     | 2            | 2.5316456 | 0.0384613      | 50.42642643            | 0.911243768            |
| GO:0007030~Golgi organization                            | 3            | 3.7974684 | 0.0411825      | 9.199415632            | 0.900572554            |
| GO:0051301~cell division                                 | 5            | 6.3291139 | 0.0659604      | 3.241698842            | 0.965640617            |
| GO:0006281~DNA repair                                    | 4            | 5.0632911 | 0.0826131      | 3.862449684            | 0.979190132            |
| GO:0015031~protein transport                             | 5            | 6.3291139 | 0.0930191      | 2.872391379            | 0.982033742            |

**Table S9: Differential IR between Control & AD frontal cortex (Emory: SRS373257)**

| S/N | Gene ID  | Ensembl ID      | Chr Position             | p-value     | IR ratio AD | IR ratio Control |
|-----|----------|-----------------|--------------------------|-------------|-------------|------------------|
| 1   | COG5     | ENSG00000164597 | 7:107548180-107548277:-  | 0.045150552 | 0.185185451 | 0.021640105      |
| 2   | USO1     | ENSG00000138768 | 4:75804272-75805139:+    | 0.035373017 | 0.166666915 | 0.018394084      |
| 3   | DIMT1    | ENSG00000086189 | 5:62394047-62394483:-    | 0.04254845  | 0.333333474 | 0.065217579      |
| 4   | POLR3C   | ENSG00000186141 | 1:145837596-145838055:+  | 0.019148383 | 0.178571647 | 0.016721895      |
| 5   | SMNDC1   | ENSG00000119953 | 10:110295381-110297566:- | 0.040455855 | 0.119047781 | 0.016721885      |
| 6   | QRSL1    | ENSG00000130348 | 6:106654922-106655614:+  | 0.031938954 | 0.324324445 | 0.062500172      |
| 7   | IKZF5    | ENSG00000095574 | 10:122994723-122995993:- | 0.012939394 | 0.185185398 | 0.015328404      |
| 8   | CNOT8    | ENSG00000155508 | 5:154870822-154871729:+  | 0.047646266 | 0.185185404 | 0.024756493      |
| 9   | ARHGEF12 | ENSG00000196914 | 11:120477305-120477446:+ | 0.045123617 | 0.156862889 | 0.024756479      |
| 10  | THOC1    | ENSG00000079134 | 18:223505-224083:-       | 0.025191574 | 0.184210672 | 0.024261344      |
| 11  | ADD1     | ENSG00000087274 | 4:2894093-2894581:+      | 0.034580622 | 0.179487347 | 0.024261354      |
| 12  | TSGA10   | ENSG00000135951 | 2:99105436-99105526:-    | 0.019409713 | 0.353846282 | 0.05769248       |
| 13  | COG4     | ENSG00000103051 | 16:70481487-70481763:-   | 0.037524471 | 0.125000219 | 0.014149301      |
| 14  | GTF2H3   | ENSG00000111358 | 12:123652561-123652706:+ | 0.032563163 | 0.116279242 | 0.014149295      |
| 15  | MMS19    | ENSG00000155229 | 10:97460232-97460694:-   | 0.029641081 | 0.361111216 | 0.084745911      |
| 16  | USF1     | ENSG00000158773 | 1:161040670-161040813:-  | 0.031151403 | 0.148148411 | 0.013625265      |
| 17  | GORASP2  | ENSG00000115806 | 2:170950290-170951327:+  | 0.04051167  | 0.11538485  | 0.013625246      |
| 18  | ZNF585A  | ENSG00000196967 | 19:37165696-37169838:-   | 0.049263602 | 0.111111352 | 0.01362525       |
| 19  | IPO5     | ENSG00000065150 | 13:98015641-98015725:+   | 0.033113797 | 0.153846317 | 0.020560471      |
| 20  | TIA1     | ENSG00000116001 | 2:70212845-70214348:-    | 0.045395139 | 0.227272845 | 0.049180469      |
| 21  | TPRKB    | ENSG00000144034 | 2:73732285-73732583:-    | 0.008268492 | 0.210526451 | 0.019886352      |
| 22  | DYNC1L1  | ENSG00000144635 | 3:32530328-32530460:-    | 0.041760191 | 0.156250206 | 0.019565624      |
| 23  | RRM1     | ENSG00000167325 | 11:4121765-4122140:+     | 0.044909335 | 0.147059019 | 0.01956562       |
| 24  | POLR3C   | ENSG00000186141 | 1:145833582-145836493:+  | 0.035778396 | 0.114285933 | 0.012061706      |
| 25  | GTPBP8   | ENSG00000163607 | 3:112995265-112996891:+  | 0.028210179 | 0.125000253 | 0.011867157      |
| 26  | MSH2     | ENSG00000095002 | 2:47475270-47476366:+    | 0.031630704 | 0.125000257 | 0.011867161      |
| 27  | MTHFD1   | ENSG00000100714 | 14:64431639-64431786:+   | 0.017491145 | 0.160000258 | 0.011678801      |
| 28  | PHGDH    | ENSG00000092621 | 1:119726905-119727003:+  | 0.027576971 | 0.116279267 | 0.011678795      |
| 29  | NELFCD   | ENSG00000101158 | 20:58992020-58992997:+   | 0.027634745 | 0.150943545 | 0.01895419       |
| 30  | GART     | ENSG00000159131 | 21:33534753-33535224:-   | 0.023819345 | 0.125000245 | 0.011496306      |
| 31  | HMGCR    | ENSG00000113161 | 5:75359310-75359397:+    | 0.04113849  | 0.275862244 | 0.04411782       |
| 32  | ANKRD37  | ENSG00000186352 | 4:185396950-185397149:+  | 0.030780113 | 0.020560474 | 0.166666934      |
| 33  | CDC40    | ENSG00000168438 | 6:110219479-110219735:+  | 0.041651598 | 0.250000163 | 0.043478412      |
| 34  | ATG10    | ENSG00000152348 | 5:82253429-82254067:+    | 0.04147013  | 0.187500158 | 0.028169149      |
| 35  | NXF1     | ENSG00000162231 | 11:62800486-62801093:-   | 0.039106816 | 0.125000163 | 0.017085467      |
| 36  | OGFOD1   | ENSG00000087263 | 16:56462634-56466151:+   | 0.035446526 | 0.181818311 | 0.027777908      |
| 37  | GLS2     | ENSG00000135423 | 12:56472751-56473227:-   | 0.042926065 | 0.250000176 | 0.040540704      |
| 38  | ATG13    | ENSG00000175224 | 11:46657622-46659391:+   | 0.048274714 | 0.111111262 | 0.016848167      |
| 39  | PDLIM5   | ENSG00000163110 | 4:94585737-94586407:+    | 0.017879351 | 0.105263331 | 0.010078952      |
| 40  | SKAP2    | ENSG00000005020 | 7:26669656-26670090:-    | 0.036449147 | 0.1282053   | 0.016392817      |
| 41  | IFT172   | ENSG00000138002 | 2:27445105-27445295:-    | 0.04536338  | 0.10909105  | 0.016174244      |
| 42  | EIF5A    | ENSG00000132507 | 17:7311481-7311577:+     | 0.008120218 | 0.127272882 | 0.009681104      |
| 43  | LGMN     | ENSG00000100600 | 14:92712871-92713822:-   | 0.008893186 | 0.166666913 | 0.009555385      |
| 44  | TRNAU1AP | ENSG00000180098 | 1:28571900-28577499:+    | 0.011359809 | 0.111111267 | 0.009555371      |

| S/N | Gene ID   | Ensembl ID      | Chr Position             | p-value     | IR ratio AD | IR ratio Control |
|-----|-----------|-----------------|--------------------------|-------------|-------------|------------------|
| 45  | SLC4A1AP  | ENSG00000163798 | 2:27675692-27677294:+    | 0.049499883 | 0.106383135 | 0.01555216       |
| 46  | COQ10B    | ENSG00000115520 | 2:197470171-197473756:+  | 0.031504241 | 0.137931241 | 0.015163361      |
| 47  | OGFOD1    | ENSG00000087263 | 16:56474950-56475506:+   | 0.008046599 | 0.49230774  | 0.150537736      |
| 48  | NMD3      | ENSG00000169251 | 3:161247330-161249453:+  | 0.018865735 | 0.10714308  | 0.009083504      |
| 49  | RAD1      | ENSG00000113456 | 5:34909356-34911553:-    | 0.033341399 | 0.106383113 | 0.01479351       |
| 50  | PTK2      | ENSG00000169398 | 8:140668424-140669726:-  | 0.035461563 | 0.232142989 | 0.046511763      |
| 51  | ATP6VOA1  | ENSG00000033627 | 17:42495716-42498923:+   | 0.026772649 | 0.230769381 | 0.034883855      |
| 52  | MLF2      | ENSG00000089693 | 12:6751676-6751924:-     | 0.022822578 | 0.135135309 | 0.014271397      |
| 53  | MFSD14A   | ENSG00000156875 | 1:100077277-100078450:+  | 0.006849772 | 0.135135322 | 0.008656049      |
| 54  | NDUFS1    | ENSG00000023228 | 2:206147834-206149019:-  | 0.04137445  | 0.108108284 | 0.014105449      |
| 55  | SBNO1     | ENSG00000139697 | 12:123328895-123330418:- | 0.003838856 | 0.125000147 | 0.008360948      |
| 56  | TRAPPC13  | ENSG00000113597 | 5:65664384-65664503:+    | 0.044381269 | 0.100000167 | 0.013629983      |
| 57  | G3BP2     | ENSG00000138757 | 4:75655870-75656923:-    | 0.039650638 | 0.25000014  | 0.052631709      |
| 58  | OGFOD1    | ENSG00000087263 | 16:56467293-56467904:+   | 0.037384797 | 0.100000157 | 0.01333042       |
| 59  | FASTKD2   | ENSG00000118246 | 2:206788155-206788818:+  | 0.036666887 | 0.214285819 | 0.052631688      |
| 60  | RNF41     | ENSG00000181852 | 12:56208298-56210296:-   | 0.032259502 | 0.102564263 | 0.01276914       |
| 61  | METTL3    | ENSG00000165819 | 14:21499802-21500494:-   | 0.039672013 | 0.196969795 | 0.050505154      |
| 62  | PRUNE2    | ENSG00000106772 | 9:76629290-76636470:-    | 0.018038287 | 0.121212287 | 0.012636126      |
| 63  | PPME1     | ENSG00000214517 | 11:74204445-74222311:+   | 0.034823255 | 0.125000247 | 0.0121307        |
| 64  | ENPP5     | ENSG00000112796 | 6:46165563-46167433:-    | 0.01484043  | 0.133333517 | 0.011892831      |
| 65  | RP3-38210 | ENSG00000213204 | 6:87500667-87501157:+    | 0.006635185 | 0.100000137 | 0.007284792      |
| 66  | ATP6VOA1  | ENSG00000033627 | 17:42499042-42500706:+   | 0.012956221 | 0.103448497 | 0.007074658      |
| 67  | TM9SF2    | ENSG00000125304 | 13:99540793-99541558:+   | 0.033907067 | 0.214285826 | 0.050847566      |
| 68  | PTCD3     | ENSG00000132300 | 2:86125515-86125794:+    | 0.042874667 | 0.27272735  | 0.094488286      |
| 69  | KLHDC2    | ENSG00000165516 | 14:49779675-49779747:+   | 0.038938168 | 0.376344152 | 0.140845187      |
| 70  | ATP6V1A   | ENSG00000114573 | 3:113788875-113789731:+  | 0.035207233 | 0.218750142 | 0.04411776       |
| 71  | PPID      | ENSG00000171497 | 4:158715684-158717011:-  | 0.012939061 | 0.20454557  | 0.034246664      |
| 72  | ATP1A1    | ENSG00000163399 | 1:116390411-116390781:+  | 0.010532869 | 0.105263323 | 0.008196416      |
| 73  | ERLEC1    | ENSG00000068912 | 2:53814935-53817897:+    | 0.019723476 | 0.181818276 | 0.042944859      |
| 74  | GLUD1     | ENSG00000148672 | 10:87060825-87060914:-   | 0.048838836 | 0.188034251 | 0.071428644      |
| 75  | ACTR6     | ENSG00000075089 | 12:100218586-100220007:+ | 0.03324121  | 0.101695021 | 0.018750068      |
| 76  | ACTR6     | ENSG00000075089 | 12:100210208-100210294:+ | 0.014370027 | 0.108433838 | 0.011560765      |
| 77  | NAPB      | ENSG00000125814 | 20:23379495-23379866:-   | 0.024340469 | 0.162162324 | 0.022346464      |
| 78  | PREPL     | ENSG00000138078 | 2:44339363-44342416:-    | 0.022380328 | 0.100000134 | 0.011111181      |
| 79  | IFI44L    | ENSG00000137959 | 1:78635489-78637031:+    | 0.014606249 | 0.172414074 | 0.006628842      |
| 80  | CLASP2    | ENSG00000163539 | 3:33498717-33501651:-    | 0.03187246  | 0.132075535 | 0.04123717       |
| 81  | FBXO3     | ENSG00000110429 | 11:33754500-33755770:-   | 0.043878536 | 0.135802558 | 0.038647415      |
| 82  | TRIM2     | ENSG00000109654 | 4:153324148-153328529:+  | 0.041436874 | 0.156862807 | 0.057777836      |
| 83  | NSL1      | ENSG00000117697 | 1:212738686-212739533:-  | 0.003088803 | 0.143939453 | 0.026087008      |
| 84  | ZNF207    | ENSG00000010244 | 17:32368014-32369294:+   | 0.035341742 | 0.153333388 | 0.056603832      |
| 85  | NDUFS2    | ENSG00000158864 | 1:161213921-161214155:+  | 0.019058652 | 0.380880173 | 0.145077841      |
