# Supplementary material for: Increased intron retention is a post‐transcriptional signature associated with progressive aging and Alzheimer’s disease
Source: PubMed Central journal article supplement (PMC6516162; doi:10.1111/acel.12928), 2019-03-13
Supplement: ACEL-18-e12928-s011.pdf [file ACEL-18-e12928-s011.pdf]

**Table S10: Differential IR genes whose quantile normalized peptide expression is significantly different between Control & AD frontal cortex**

| Gene     | Accession | AD1      | AD2      | AD3      | AD4      | AD5      | AD6      | AD7      | AD8      | AD9      | AD10     | Average    |
|----------|-----------|----------|----------|----------|----------|----------|----------|----------|----------|----------|----------|------------|
| MAPT     | P10636    | 1.738671 | 1.84477  | 1.151977 | 1.342767 | 1.076752 | 1.608114 | 1.779346 | 1.19947  | 1.150064 | 2.176316 | 1.50682473 |
| AP3D1    | O14617-5  | 0.825239 | 0.975037 | 0.957936 | 1.023596 | 0.830064 | 0.827893 | 0.872182 | 0.852882 | 0.808655 | 0.864334 | 0.88378183 |
| ADAM11   | O75078    | 0.910923 | 0.801974 | 0.879972 | 0.993109 | 0.842598 | 0.970275 | 0.932228 | 0.939643 | 0.910569 | 1.086574 | 0.92678672 |
| NPTX2    | P47972    | 0.24523  | 0.234407 | 0.649577 | 0.616106 | 0.223178 | 0.751482 | 0.24748  | 0.414792 | 0.820307 | 0.866915 | 0.50694742 |
| ABHD16A  | O95870    | 0.827465 | 0.85258  | 0.88604  | 0.926356 | 0.880032 | 0.879227 | 0.858791 | 0.890894 | 0.868901 | 0.778537 | 0.86488234 |
| RAB3GAP1 | Q15042-3  | 0.825378 | 0.937161 | 0.96407  | 0.981767 | 0.920502 | 0.853819 | 0.882818 | 0.951773 | 0.948865 | 0.805275 | 0.907143   |
| MAPT     | P10636-4  | 2.160359 | 2.272352 | 1.090306 | 1.526824 | 1.078492 | 2.957526 | 2.126318 | 1.12891  | 1.040302 | 3.33051  | 1.87118991 |
| ACTN4    | K7EJH8    | 0.686108 | 0.682997 | 0.818833 | 0.850523 | 1.073386 | 0.79464  | 0.903214 | 1.006444 | 0.952301 | 0.983744 | 0.87521899 |
| PDHA1    | P08559-4  | 0.767548 | 0.803183 | 1.025595 | 1.061145 | 0.788662 | 0.835401 | 0.966521 | 0.826353 | 0.840523 | 1.009419 | 0.89243499 |
| BRSK1    | Q8TDC3-2  | 0.789722 | 0.972451 | 1.001872 | 1.077078 | 0.888144 | 0.883996 | 0.904077 | 0.87916  | 0.952596 | 0.901019 | 0.92501164 |
| DOCK3    | Q8IZD9    | 0.778817 | 0.942315 | 0.879854 | 1.003908 | 0.911814 | 0.845317 | 0.926519 | 0.982149 | 0.977641 | 0.8284   | 0.9076736  |
| PLXNB1   | O43157    | 1.328527 | 1.334818 | 0.823432 | 0.930212 | 1.291216 | 1.261905 | 1.021888 | 1.212717 | 1.234168 | 1.066353 | 1.15052351 |
| TIMM44   | O43615    | 0.762004 | 0.778817 | 1.014972 | 1.196345 | 0.899952 | 0.839929 | 0.938646 | 0.944456 | 0.893709 | 0.966179 | 0.92350095 |
| NRBP1    | F8W6G1    | 0.875817 | 0.879521 | 0.87605  | 1.003136 | 0.807255 | 0.789675 | 1.012172 | 0.909307 | 0.9098   | 0.890755 | 0.89534873 |
| CSNK1E   | P49674    | 1.026787 | 0.944418 | 1.03178  | 1.150287 | 1.068305 | 1.106712 | 1.092003 | 1.051855 | 1.040216 | 0.899315 | 1.04116779 |
| GALT     | P07902    | 1.247315 | 1.152061 | 1.355518 | 1.274357 | 1.068224 | 1.078615 | 1.201786 | 1.085539 | 1.381638 | 0.915472 | 1.1760525  |
| ACTN4    | H7C144    | 0.377773 | 0.795578 | 0.852174 | 0.66768  | 0.965664 | 0.760151 | 0.827976 | 0.65829  | 0.749693 | 0.935493 | 0.75904721 |
| NCKIPSD  | Q9NZQ3    | 0.843233 | 0.99182  | 0.977716 | 1.008804 | 0.916485 | 0.935913 | 0.904795 | 0.837582 | 0.914886 | 0.75162  | 0.90828527 |
| NDUFA10  | E7ESZ7    | 0.611996 | 0.733741 | 0.967979 | 1.09041  | 0.713715 | 0.873482 | 0.887599 | 0.749363 | 0.815149 | 0.99488  | 0.84383148 |
| SLC25A27 | O95847    | 0.523803 | 0.616417 | 0.932411 | 1.248211 | 0.665766 | 0.547713 | 1.0276   | 0.875598 | 0.706599 | 0.664828 | 0.7808946  |
| ATL2     | Q8NHH9    | 0.854321 | 0.916095 | 1.093864 | 0.849055 | 0.864829 | 0.72422  | 0.8051   | 0.882158 | 1.066844 | 0.774257 | 0.88307437 |
| AUH      | Q13825    | 0.731463 | 0.880963 | 1.003296 | 0.97468  | 0.887803 | 0.867755 | 1.01474  | 0.78156  | 0.833407 | 1.01316  | 0.89888269 |
| ACTN4    | O43707    | 0.83547  | 0.759354 | 1.070997 | 0.996882 | 0.965199 | 0.89022  | 0.963112 | 0.838497 | 1.07534  | 0.981422 | 0.93764917 |
| SCRIB    | Q14160-3  | 1.230819 | 1.204473 | 1.024068 | 0.915586 | 1.074465 | 0.930327 | 0.905956 | 1.170828 | 1.16091  | 0.997001 | 1.06144321 |
| ATL2     | Q8NHH9-4  | 0.854321 | 0.916095 | 1.142821 | 0.860668 | 0.864829 | 0.72422  | 0.8051   | 0.882158 | 1.053594 | 0.777103 | 0.88809091 |
| DLG1     | Q12959-2  | 1.256927 | 0.915127 | 0.930164 | 0.809488 | 1.320875 | 1.650803 | 1.075746 | 1.333664 | 1.247139 | 1.093187 | 1.163312   |
| CACNA2D1 | P54289-2  | 0.74529  | 0.976588 | 1.130045 | 1.032191 | 0.910014 | 0.832157 | 0.726329 | 0.869351 | 0.848634 | 0.98757  | 0.90581696 |
| PPP5C    | P53041    | 0.798244 | 0.893223 | 0.942154 | 1.02578  | 0.865854 | 0.887963 | 1.043021 | 0.916808 | 0.917985 | 0.910045 | 0.92010762 |
| CHERP    | J3QK89    | 1.10775  | 1.078236 | 1.100695 | 0.979875 | 1.121651 | 1.187231 | 1.261363 | 1.011968 | 1.080165 | 1.185023 | 1.1113956  |
| SLC30A3  | Q99726    | 0.751772 | 0.79169  | 1.040372 | 1.258814 | 0.681976 | 0.663982 | 0.84866  | 0.281228 | 0.808775 | 0.91835  | 0.80456198 |
| UNC13A   | F8W059    | 0.718915 | 1.040375 | 1.097147 | 1.140823 | 0.804099 | 0.808965 | 0.947623 | 0.789206 | 0.785698 | 0.773695 | 0.8906546  |

| Gene      | Accession  | AD1      | AD2      | AD3      | AD4      | AD5      | AD6      | AD7      | AD8      | AD9      | AD10     | Average    |
|-----------|------------|----------|----------|----------|----------|----------|----------|----------|----------|----------|----------|------------|
| SYNGR1    | O43759     | 0.674858 | 0.946965 | 1.117185 | 1.043498 | 0.624915 | 0.584412 | 1.011932 | 0.275235 | 0.631515 | 0.681177 | 0.75916928 |
| TPD52L1   | J3KNE7     | 1.347693 | 1.258327 | 1.164416 | 0.902899 | 1.115505 | 1.002464 | 1.156564 | 1.253353 | 0.985619 | 1.007419 | 1.11942601 |
| HMGA1     | P17096     | 0.99426  | 0.826503 | 0.902497 | 0.876814 | 1.191589 | 1.10653  | 0.994302 | 1.225302 | 1.192814 | 1.270803 | 1.05814138 |
| MAGED2    | Q9UNF1     | 1.052644 | 1.17814  | 1.224932 | 0.874349 | 0.989526 | 1.164152 | 1.063366 | 1.059428 | 1.152808 | 1.016176 | 1.07755209 |
| HMGA1     | P17096-3   | 0.99426  | 0.826503 | 0.892406 | 0.843476 | 1.191589 | 1.10653  | 0.994302 | 1.225302 | 1.192814 | 1.270803 | 1.05379851 |
| PMPCB     | O75439     | 0.872137 | 0.972198 | 0.824452 | 1.12262  | 0.816278 | 0.942078 | 1.01143  | 0.948036 | 0.842848 | 0.986367 | 0.93384444 |
| ALCAM     | Q13740     | 0.954856 | 0.98295  | 1.104678 | 0.892062 | 1.121741 | 1.189303 | 1.0762   | 1.168538 | 1.228696 | 1.156779 | 1.08758048 |
| PMPCB     | G3V0E4     | 0.872137 | 0.972198 | 0.834362 | 1.103129 | 0.832228 | 0.937098 | 1.016405 | 0.955898 | 0.842848 | 0.986367 | 0.93526705 |
| RNMT      | O43148-2   | 0.857428 | 0.685791 | 0.830122 | 0.985768 | 0.865127 | 0.892245 | 0.931054 | 0.772646 | 0.847102 | 1.027599 | 0.86948822 |
| ALCAM     | Q13740-2   | 0.954374 | 0.981945 | 1.107368 | 0.889212 | 1.121431 | 1.182945 | 1.0762   | 1.168538 | 1.229861 | 1.152668 | 1.08645428 |
| HNRNPA2B1 | P22626     | 1.102078 | 0.985615 | 0.9651   | 0.898966 | 1.120409 | 1.049114 | 0.951911 | 1.052486 | 1.080309 | 1.246428 | 1.04524171 |
| ITGA3     | P26006-1   | 1.532365 | 1.313401 | 0.946099 | 1.033127 | 1.20756  | 1.307857 | 1.073273 | 0.982528 | 0.806987 | 0.70335  | 1.09065464 |
| ACO2      | A2A274     | 0.90096  | 0.9087   | 1.020844 | 1.01871  | 0.850519 | 0.931098 | 0.965018 | 0.84897  | 0.902589 | 1.064336 | 0.94117427 |
| ACO2      | Q99798     | 0.902126 | 0.908599 | 1.020844 | 1.01871  | 0.850519 | 0.931098 | 0.965018 | 0.84897  | 0.902589 | 1.064336 | 0.94128072 |
| MYH7B     | A0A087XOT3 | 1.284338 | 1.640422 | 0.202002 | 0.924563 | 1.071707 | 1.112201 | 1.34014  | 0.79425  | 1.283592 | 2.193455 | 1.18466708 |
| GK        | P32189     | 0.763767 | 0.815718 | 0.990322 | 1.191677 | 0.876787 | 0.859488 | 1.100946 | 0.811597 | 0.86176  | 0.902157 | 0.91742178 |
| EPB41L3   | Q9Y2J2-2   | 0.778919 | 0.795825 | 0.931541 | 0.899091 | 0.857635 | 0.910014 | 0.866977 | 0.943922 | 0.964922 | 1.009381 | 0.8958229  |
| CLTC      | A0A087WVQ  | 0.880074 | 0.968764 | 1.035546 | 0.984166 | 0.863484 | 0.893352 | 1.041627 | 0.876122 | 0.88575  | 0.858703 | 0.92875871 |
| EFR3B     | Q9Y2G0     | 0.927626 | 0.998889 | 1.13861  | 0.969614 | 0.919343 | 0.83124  | 0.886781 | 0.813601 | 0.8948   | 0.977233 | 0.9357738  |
| C9orf142  | Q9BUH6     | 1.222219 | 1.042874 | 1.038025 | 0.974363 | 1.062938 | 0.788145 | 0.997775 | 1.234054 | 1.037343 | 1.000784 | 1.03985208 |
| GRIPAP1   | Q4V328     | 0.811438 | 0.98776  | 0.985045 | 1.077894 | 0.882486 | 0.900905 | 0.965311 | 0.926628 | 0.859639 | 0.875381 | 0.92724879 |
| SHMT1     | P34896     | 1.275349 | 1.399174 | 0.927293 | 0.68515  | 1.273222 | 1.596278 | 0.803919 | 1.085165 | 1.159734 | 1.091182 | 1.1296465  |
| TTC19     | Q6DKK2     | 0.819872 | 1.013798 | 0.912854 | 0.961086 | 0.907431 | 1.019172 | 0.273835 | 0.222629 | 0.743981 | 0.996557 | 0.78712158 |
| SYNJ1     | C9JFZ1     | 0.705809 | 0.938056 | 1.010317 | 0.989543 | 0.870549 | 0.877475 | 1.01703  | 0.938587 | 0.900855 | 0.88313  | 0.91313511 |
| CTNNA1    | P35221     | 1.09993  | 1.033259 | 1.1081   | 0.88301  | 1.25108  | 1.092777 | 1.008895 | 1.349979 | 1.156418 | 0.927274 | 1.09107214 |
| WBP2      | Q969T9     | 0.83609  | 0.985668 | 0.850733 | 0.999542 | 0.967425 | 0.953301 | 0.9029   | 0.835379 | 0.905505 | 1.028623 | 0.92651666 |
| FSD1      | Q9BTV5     | 0.777392 | 0.76539  | 0.986557 | 1.106591 | 0.949622 | 0.891601 | 0.830027 | 0.936831 | 1.126426 | 1.078903 | 0.94493408 |
| ANK2      | I6L894     | 0.950612 | 1.032654 | 0.995095 | 0.949266 | 1.407183 | 1.320693 | 0.899243 | 0.855006 | 1.560126 | 1.157362 | 1.11272388 |
| MRPL39    | Q9NYK5     | 0.669747 | 0.96108  | 0.496905 | 1.198839 | 0.836315 | 0.969711 | 0.953632 | 0.842455 | 0.97417  | 1.233011 | 0.91358641 |
| SBF1      | O95248-4   | 0.859849 | 1.019919 | 0.947127 | 0.965156 | 0.911327 | 0.833602 | 1.019641 | 0.9687   | 0.932749 | 0.807649 | 0.92657187 |
| ANKRD28   | O15084-1   | 0.76512  | 0.831099 | 1.143824 | 1.015216 | 0.965559 | 0.853444 | 0.891227 | 1.015005 | 0.976911 | 0.888472 | 0.93458761 |
| YIF1B     | Q5BJH7     | 0.809235 | 0.521927 | 0.202002 | 0.196187 | 1.021871 | 0.911417 | 0.854895 | 1.008178 | 1.017039 | 0.235499 | 0.67782512 |

| Gene    | Accession | AD1      | AD2      | AD3      | AD4      | AD5      | AD6      | AD7      | AD8      | AD9      | AD10     | Average    |
|---------|-----------|----------|----------|----------|----------|----------|----------|----------|----------|----------|----------|------------|
| MAPT    | P10636-8  | 1.755314 | 1.848022 | 1.287149 | 1.663253 | 0.223178 | 0.21117  | 1.799803 | 1.204369 | 1.150675 | 2.251523 | 1.33944559 |
| TECPR1  | Q7Z6L1-4  | 0.885716 | 0.98873  | 0.828853 | 1.043224 | 0.900954 | 0.851416 | 0.835003 | 0.77755  | 0.847427 | 1.361596 | 0.93204707 |
| GGA3    | Q9NZ52    | 0.598971 | 0.589251 | 0.880227 | 0.839039 | 0.966964 | 0.984558 | 0.927096 | 0.840348 | 0.780612 | 0.947002 | 0.83540677 |
| MAST3   | O60307    | 0.962377 | 1.038137 | 0.912907 | 1.006396 | 0.90527  | 0.992896 | 1.012805 | 1.000813 | 0.98316  | 0.747263 | 0.9562025  |
| HMGCS1  | Q01581    | 0.876318 | 1.197222 | 0.640003 | 0.611586 | 0.796703 | 1.106803 | 0.819351 | 0.619332 | 0.84099  | 0.869034 | 0.83773416 |
| GOPC    | Q9HD26    | 1.006917 | 0.923076 | 1.000035 | 0.994068 | 0.897228 | 0.910191 | 1.109119 | 0.870453 | 0.986337 | 0.968207 | 0.96656326 |
| MAPRE3  | Q9UPY8    | 0.901602 | 1.004847 | 0.979704 | 1.089857 | 0.891705 | 0.870998 | 0.933384 | 0.971996 | 0.888841 | 1.006725 | 0.95396596 |
| GAB1    | Q13480-2  | 1.171013 | 0.939969 | 0.833302 | 0.767473 | 1.499983 | 1.528353 | 0.959247 | 1.601143 | 1.455646 | 1.050914 | 1.18070436 |
| MORF4L2 | Q15014    | 1.113458 | 0.787274 | 0.959235 | 1.155741 | 1.049802 | 0.899535 | 1.460343 | 1.38129  | 1.105936 | 1.277069 | 1.11896815 |
| ITGB4   | P16144    | 1.522631 | 1.530543 | 1.147583 | 0.812298 | 1.243962 | 1.091215 | 0.699689 | 0.926423 | 1.141422 | 0.96741  | 1.1083175  |
| HTRA2   | O43464    | 0.963371 | 0.880698 | 0.787544 | 0.887632 | 0.899391 | 0.996917 | 0.809558 | 0.896937 | 0.894988 | 1.071055 | 0.90880916 |
| LAMP2   | P13473-3  | 1.300956 | 0.826919 | 0.774311 | 0.757129 | 1.54166  | 1.511504 | 0.868807 | 1.312572 | 2.176316 | 2.268116 | 1.33382902 |
| PPP1R3F | Q6ZSY5    | 0.846359 | 0.818758 | 0.914986 | 0.869048 | 0.989751 | 1.202736 | 1.016771 | 0.908915 | 0.845231 | 0.919759 | 0.9332315  |
| AIFM1   | O95831    | 0.854002 | 0.571056 | 0.89485  | 1.013307 | 0.873602 | 0.916485 | 1.106445 | 0.810053 | 0.902103 | 1.118251 | 0.9060154  |
| GABBR1  | Q9UBS5    | 0.722222 | 1.060005 | 1.048474 | 1.187516 | 0.847332 | 0.825841 | 0.870119 | 0.772125 | 0.815637 | 0.828552 | 0.89778236 |
| DLGAP4  | Q9Y2H0-1  | 0.794613 | 0.92811  | 1.017197 | 1.204045 | 0.926025 | 0.899281 | 0.906658 | 0.905226 | 0.745347 | 0.854266 | 0.91807683 |
| WASF1   | Q92558    | 0.807356 | 0.954374 | 1.13834  | 0.981286 | 0.88342  | 0.845413 | 0.88483  | 0.914666 | 0.820786 | 0.937281 | 0.91677508 |
| RBBP7   | Q16576-2  | 1.028165 | 0.971053 | 1.181395 | 0.86234  | 1.077345 | 1.0144   | 0.901744 | 0.909028 | 1.010484 | 1.041796 | 0.99977508 |
| STK11   | Q15831    | 0.741425 | 0.704161 | 1.130535 | 1.06986  | 1.06253  | 1.028578 | 0.705994 | 1.048511 | 0.902403 | 0.942011 | 0.93360081 |
| MPV17   | P39210    | 0.942998 | 0.851958 | 1.047638 | 0.992995 | 0.865302 | 1.032734 | 0.715372 | 0.706664 | 0.92215  | 0.873972 | 0.89517834 |
| FLII    | Q13045    | 0.895112 | 0.903039 | 1.022627 | 1.002562 | 0.926449 | 0.955061 | 0.919983 | 0.918548 | 1.078459 | 0.763122 | 0.93849629 |
| MAP7    | Q14244    | 1.237982 | 1.083944 | 1.061145 | 1.528188 | 1.196638 | 1.465834 | 0.898226 | 1.379295 | 1.435333 | 1.199837 | 1.24864223 |
| ZNF207  | X6R4W8    | 1.078047 | 0.871182 | 1.068095 | 1.125722 | 1.080047 | 1.170403 | 1.077476 | 0.968795 | 1.021992 | 1.007058 | 1.04688177 |
| ARFGAP1 | Q8N6T3-2  | 0.81099  | 0.947491 | 0.954765 | 1.117391 | 0.885138 | 0.876286 | 0.859989 | 0.784154 | 0.883292 | 0.85911  | 0.89786052 |
| MAP4    | P27816    | 1.383963 | 1.092533 | 0.929029 | 0.829747 | 1.276776 | 1.381583 | 0.816762 | 1.407707 | 1.320433 | 1.082804 | 1.15213374 |
| PCM1    | Q15154    | 0.883834 | 1.030204 | 1.012362 | 1.095361 | 0.955106 | 0.890278 | 0.911718 | 0.973592 | 1.042919 | 0.811596 | 0.96069688 |
| PCIF1   | Q9H4Z3    | 1.12819  | 1.164002 | 0.869852 | 0.937038 | 1.3413   | 1.095353 | 0.817766 | 0.830027 | 1.204036 | 0.925605 | 1.03131692 |
| TIMM21  | Q9BVV7    | 0.858474 | 0.698697 | 0.993771 | 0.981158 | 0.866833 | 0.921473 | 0.743947 | 1.016944 | 1.02815  | 0.935188 | 0.90446351 |
| VCAN    | P13611    | 1.437055 | 0.988455 | 0.668126 | 0.592933 | 1.958964 | 1.330957 | 1.270271 | 1.82933  | 1.711452 | 1.272321 | 1.30598645 |
| NONO    | Q15233    | 1.001139 | 1.009891 | 1.106123 | 0.94016  | 1.064537 | 1.027452 | 0.962468 | 0.969746 | 1.06039  | 1.246692 | 1.03885975 |
| SRRT    | Q9BXP5    | 1.03989  | 1.026697 | 0.960677 | 0.883546 | 1.143964 | 1.030757 | 0.925363 | 1.031943 | 1.211083 | 1.070156 | 1.03240749 |
| RBBP7   | Q16576    | 1.028165 | 0.971053 | 1.181395 | 0.86234  | 1.08442  | 1.012554 | 0.877911 | 0.900478 | 1.006725 | 1.033412 | 0.99584531 |

| Gene    | Accession | AD1      | AD2      | AD3      | AD4      | AD5      | AD6      | AD7      | AD8      | AD9      | AD10     | Average    |
|---------|-----------|----------|----------|----------|----------|----------|----------|----------|----------|----------|----------|------------|
| CARM1   | Q86X55    | 0.93735  | 1.050002 | 0.926846 | 0.891804 | 1.007033 | 0.975082 | 0.96712  | 0.92003  | 0.986984 | 0.8549   | 0.95171517 |
| MRPL2   | Q5T653    | 1.045916 | 0.861179 | 0.766175 | 1.19076  | 0.979245 | 0.844144 | 0.946386 | 0.828453 | 0.761575 | 0.739145 | 0.89629789 |
| SH3GLB2 | Q9NR46-2  | 0.772758 | 1.0143   | 1.036412 | 0.970211 | 0.721151 | 0.7246   | 1.075327 | 0.939424 | 0.79254  | 0.892401 | 0.89391223 |
| UFD1L   | Q92890-1  | 0.98639  | 0.879734 | 0.933827 | 1.051471 | 1.190878 | 1.104471 | 1.113511 | 1.108462 | 1.096571 | 1.128714 | 1.05940293 |
| DPM1    | H0Y368    | 0.973698 | 1.150115 | 0.998089 | 0.912283 | 0.919963 | 1.052136 | 0.779914 | 0.858945 | 1.01977  | 0.918094 | 0.95830067 |
| PPP6R2  | O75170-5  | 0.895687 | 1.112569 | 0.867602 | 1.060051 | 0.905829 | 0.994873 | 0.942308 | 0.880237 | 0.988167 | 0.834137 | 0.94814592 |
| SLC27A4 | Q6P1M0    | 0.770807 | 0.89789  | 0.863338 | 0.996579 | 0.924493 | 0.953834 | 1.124042 | 0.795344 | 0.945373 | 0.795811 | 0.90675099 |
| PTGDS   | P41222    | 1.529483 | 0.757259 | 0.739354 | 0.802088 | 1.250824 | 1.124966 | 1.396378 | 1.364809 | 1.306907 | 1.590083 | 1.186215   |
| RAD50   | Q92878-2  | 1.140837 | 0.974142 | 1.049025 | 0.897491 | 1.083464 | 1.019461 | 0.992427 | 1.079515 | 1.102836 | 0.958221 | 1.02974174 |
| MAP4    | P27816-7  | 1.483076 | 1.884414 | 1.41347  | 0.861678 | 1.455724 | 1.860006 | 0.838418 | 1.353877 | 1.287272 | 0.959301 | 1.33972367 |
| UPF1    | Q92900    | 0.999547 | 1.035325 | 0.97748  | 1.01969  | 1.038075 | 0.926    | 1.002022 | 1.012881 | 0.981004 | 0.998222 | 0.99902452 |
| PRAF2   | O60831    | 0.865977 | 0.919995 | 1.074473 | 0.92012  | 1.028935 | 0.878514 | 0.96737  | 1.107394 | 1.044867 | 0.682716 | 0.94903608 |
| LONP1   | P36776    | 0.935971 | 0.879633 | 0.977831 | 1.077391 | 0.885491 | 0.964081 | 0.985524 | 0.877201 | 0.931268 | 0.920048 | 0.94344398 |
| CACNA1A | AOA087WW6 | 0.812978 | 0.941526 | 1.146666 | 1.200457 | 0.761821 | 0.808209 | 0.844282 | 0.765814 | 0.800784 | 0.880751 | 0.89632871 |
| MPRIIP  | H0Y2S9    | 0.946139 | 1.104833 | 0.959381 | 1.03865  | 0.880614 | 0.865092 | 0.967321 | 0.858139 | 0.901134 | 0.962055 | 0.94833589 |
| DLG1    | Q12959-9  | 0.925051 | 0.913679 | 1.013952 | 1.038881 | 0.888087 | 0.866075 | 0.888886 | 0.967159 | 0.948809 | 1.08863  | 0.95392105 |
| ACTR1B  | P42025    | 0.970035 | 0.909368 | 1.055806 | 0.905843 | 1.026594 | 0.829283 | 0.576551 | 0.990291 | 1.113217 | 0.973688 | 0.93506759 |
| ZER1    | Q7Z7L7    | 1.030904 | 0.973922 | 0.954088 | 0.899913 | 0.983545 | 1.063603 | 1.219821 | 0.955939 | 1.078593 | 0.939634 | 1.00999618 |
| SPTBN4  | Q9H254    | 0.912899 | 0.907054 | 0.889002 | 0.992252 | 1.053692 | 1.120854 | 0.979025 | 1.062246 | 1.088922 | 0.910108 | 0.99160538 |
| SRRT    | Q9BXP5-3  | 1.033974 | 1.034846 | 0.960677 | 0.883546 | 1.087105 | 0.974904 | 0.925363 | 1.031943 | 1.211083 | 1.070156 | 1.02135969 |
| SPTBN4  | C9JY79    | 0.911169 | 0.905733 | 0.889002 | 0.992252 | 1.053692 | 1.120854 | 0.979131 | 1.062919 | 1.088031 | 0.909424 | 0.99122061 |
| PPP6R2  | O75170    | 0.895687 | 1.112569 | 0.867602 | 1.060051 | 0.908958 | 1.02405  | 0.942308 | 0.880237 | 0.988167 | 0.834137 | 0.95137647 |
| TNPO3   | Q9Y5L0    | 0.974647 | 1.066145 | 1.000321 | 1.023011 | 0.976094 | 0.987087 | 1.028507 | 1.029555 | 0.959004 | 0.704618 | 0.9748988  |
| MAPK14  | Q16539    | 1.29099  | 1.233824 | 0.956248 | 1.260744 | 0.927804 | 0.49632  | 1.212899 | 0.965677 | 1.047101 | 0.940645 | 1.03322534 |
| SAFB2   | Q14151    | 1.070391 | 1.012644 | 0.970933 | 1.028821 | 1.198896 | 0.973472 | 0.979777 | 1.081573 | 1.065159 | 1.015181 | 1.03968468 |
| APOL2   | J3KQL8    | 0.90026  | 0.95822  | 1.086351 | 0.98643  | 0.969126 | 0.855943 | 0.903547 | 0.271713 | 0.91261  | 1.02538  | 0.88695808 |
| LARS    | Q9P2J5    | 0.824283 | 1.025804 | 0.921476 | 1.096704 | 0.866463 | 0.974682 | 1.04404  | 0.904907 | 0.89645  | 0.869273 | 0.9424083  |
| EML2    | O95834-3  | 1.156329 | 1.047977 | 0.893058 | 0.873733 | 1.103324 | 1.350133 | 1.24503  | 0.851278 | 1.012071 | 0.988146 | 1.0521079  |
| UBA5    | Q9GZZ9    | 0.953807 | 1.118779 | 1.051629 | 0.89117  | 0.957436 | 0.939092 | 1.095478 | 1.257289 | 0.955108 | 1.030699 | 1.02504865 |
| GIT1    | Q9Y2X7-3  | 0.86948  | 0.971571 | 1.038777 | 1.041372 | 1.00407  | 0.949671 | 0.933705 | 0.963354 | 0.923024 | 0.88828  | 0.95833053 |
| COG1    | Q8WTW3    | 1.065949 | 1.172647 | 0.793539 | 0.954705 | 0.950928 | 1.059402 | 0.806267 | 0.927144 | 0.889317 | 1.027775 | 0.9647673  |
| PSMB8   | P28062    | 1.527363 | 1.071056 | 1.102276 | 0.845427 | 1.234471 | 1.292183 | 0.987602 | 1.126586 | 1.162114 | 2.15216  | 1.25012346 |

| Gene | Accession | AD1      | AD2      | AD3    | AD4      | AD5      | AD6      | AD7     | AD8     | AD9      | AD10     | Average    |
|------|-----------|----------|----------|--------|----------|----------|----------|---------|---------|----------|----------|------------|
| SAT2 | Q96F10    | 1.225038 | 0.693593 | 0.7278 | 1.361863 | 1.136699 | 0.870833 | 1.51147 | 0.94885 | 1.026367 | 0.869543 | 1.03720564 |

| Gene     | Accession | CTL1     | CTL2     | CTL3     | CTL4     | CTL5     | CTL6     | CTL7     | CTL8     | CTL9     | CTL10    | Average    |
|----------|-----------|----------|----------|----------|----------|----------|----------|----------|----------|----------|----------|------------|
| MAPT     | P10636    | 0.937528 | 0.282927 | 0.645077 | 0.708893 | 0.699925 | 0.814606 | 0.676059 | 0.263107 | 0.819472 | 0.925164 | 0.67727572 |
| AP3D1    | O14617-5  | 1.189014 | 1.004018 | 1.054105 | 1.119465 | 1.057616 | 1.085463 | 1.09973  | 1.057041 | 1.090124 | 0.969371 | 1.07259463 |
| ADAM11   | O75078    | 1.15366  | 1.077091 | 1.123697 | 1.359266 | 1.077345 | 1.163594 | 1.25849  | 1.079712 | 1.106456 | 1.14935  | 1.15486628 |
| NPTX2    | P47972    | 1.369001 | 1.805746 | 0.935829 | 2.040809 | 1.54042  | 1.350714 | 2.605226 | 1.206008 | 0.873216 | 1.238329 | 1.4965299  |
| ABHD16A  | O95870    | 1.116258 | 1.034193 | 1.197682 | 1.143202 | 1.072314 | 1.217655 | 1.003735 | 1.139784 | 0.9316   | 0.892297 | 1.07487203 |
| RAB3GAP1 | Q15042-3  | 1.025155 | 1.052377 | 1.158029 | 1.077471 | 1.024099 | 0.961996 | 1.117576 | 1.105187 | 1.041583 | 1.005881 | 1.05693523 |
| MAPT     | P10636-4  | 0.706052 | 0.21956  | 0.312088 | 0.724989 | 0.46936  | 0.784621 | 0.2464   | 0.135821 | 0.637903 | 1.147908 | 0.53847036 |
| ACTN4    | K7EJH8    | 1.238312 | 1.143286 | 0.971221 | 1.375432 | 1.027038 | 1.128619 | 1.239265 | 1.159507 | 1.015076 | 1.16666  | 1.14644142 |
| PDHA1    | P08559-4  | 1.286138 | 1.045726 | 1.15416  | 1.23234  | 1.138016 | 0.98446  | 1.017529 | 1.198962 | 1.120259 | 0.997001 | 1.11745917 |
| BRSK1    | Q8TDC3-2  | 1.093343 | 1.025577 | 1.137757 | 1.055766 | 1.092548 | 1.107708 | 1.084787 | 1.053395 | 0.956554 | 1.107938 | 1.07153718 |
| DOCK3    | Q8IZD9    | 1.112231 | 1.025466 | 1.088483 | 1.009798 | 0.958081 | 1.07004  | 1.344926 | 1.119436 | 1.34162  | 1.126426 | 1.11965077 |
| PLXNB1   | O43157    | 0.807629 | 0.961591 | 0.900015 | 0.891409 | 0.914982 | 0.761821 | 0.807194 | 0.889265 | 0.940104 | 0.965491 | 0.88395013 |
| TIMM44   | O43615    | 1.21551  | 1.061464 | 1.250695 | 1.18794  | 1.07583  | 1.058434 | 1.138865 | 1.121606 | 1.037884 | 1.114318 | 1.12625465 |
| NRBP1    | F8W6G1    | 1.152626 | 1.136677 | 0.905673 | 0.962248 | 1.020786 | 1.139974 | 1.078632 | 1.017945 | 1.038662 | 1.005846 | 1.04590709 |
| CSNK1E   | P49674    | 0.821261 | 1.016489 | 0.953968 | 0.964238 | 0.841096 | 0.879227 | 0.963579 | 0.723331 | 0.886245 | 0.874499 | 0.89239322 |
| GALT     | P07902    | 0.790338 | 0.794669 | 0.785397 | 0.955762 | 0.772486 | 1.061735 | 0.870453 | 1.021128 | 0.82023  | 1.248974 | 0.91211725 |
| ACTN4    | H7C144    | 1.498032 | 1.048684 | 1.030404 | 0.840594 | 1.149852 | 1.433845 | 1.203123 | 0.97388  | 0.851159 | 0.958951 | 1.09885249 |
| NCKIPSD  | Q9NZQ3    | 1.055991 | 1.15296  | 1.258218 | 1.128221 | 1.076838 | 1.137374 | 1.028959 | 0.981969 | 1.214563 | 0.843055 | 1.08781478 |
| NDUFA10  | E7ESZ7    | 1.201482 | 0.967396 | 1.408917 | 1.27586  | 1.243014 | 0.97274  | 0.940213 | 1.299316 | 0.95315  | 0.958904 | 1.12209916 |
| SLC25A27 | O95847    | 1.134209 | 1.18912  | 1.322772 | 1.252046 | 1.00909  | 1.089275 | 0.955853 | 1.116482 | 1.043008 | 0.860415 | 1.09722698 |
| ATL2     | Q8NHH9    | 1.130976 | 1.233581 | 1.003009 | 1.13209  | 0.934407 | 1.129823 | 0.937497 | 1.119841 | 1.3639   | 0.9826   | 1.09677231 |
| AUH      | Q13825    | 1.045806 | 1.10315  | 1.270404 | 1.223447 | 1.120712 | 0.977238 | 1.019728 | 1.036471 | 1.136786 | 0.876664 | 1.0810406  |
| ACTN4    | O43707    | 1.093643 | 0.93916  | 1.094756 | 1.152518 | 1.050748 | 1.119443 | 1.1208   | 1.106201 | 1.02187  | 1.145466 | 1.08446055 |
| SCRIB    | Q14160-3  | 0.839877 | 0.865705 | 0.856487 | 0.880793 | 0.906865 | 0.953655 | 0.921495 | 0.906265 | 0.853626 | 1.029175 | 0.9013943  |
| ATL2     | Q8NHH9-4  | 1.130976 | 1.233581 | 1.023411 | 1.127688 | 0.934407 | 1.129823 | 0.937497 | 1.119841 | 1.30655  | 0.95271  | 1.0896483  |
| DLG1     | Q12959-2  | 0.702317 | 0.930497 | 0.54855  | 0.61684  | 0.966179 | 0.787955 | 0.967046 | 0.890871 | 0.982449 | 1.0256   | 0.84183031 |
| CACNA2D1 | P54289-2  | 1.27392  | 0.953334 | 1.021474 | 0.942633 | 1.096163 | 1.094179 | 1.15036  | 1.069147 | 1.183393 | 1.04153  | 1.08261327 |
| PPP5C    | P53041    | 1.101818 | 1.024654 | 0.926015 | 1.092772 | 0.954805 | 1.020725 | 1.05104  | 1.111412 | 1.02166  | 0.991939 | 1.02968405 |
| CHERP    | J3QK89    | 1.030417 | 1.073356 | 0.713885 | 0.839636 | 0.881541 | 1.176267 | 0.84327  | 0.639388 | 1.022325 | 0.9316   | 0.91516853 |

| Gene      | Accession  | CTL1     | CTL2     | CTL3     | CTL4     | CTL5     | CTL6     | CTL7     | CTL8     | CTL9     | CTL10    | Average    |
|-----------|------------|----------|----------|----------|----------|----------|----------|----------|----------|----------|----------|------------|
| SLC30A3   | Q99726     | 1.411356 | 0.913877 | 0.851558 | 1.317621 | 1.07177  | 1.385718 | 1.092455 | 1.003948 | 1.228233 | 1.08089  | 1.1357425  |
| UNC13A    | F8W059     | 1.244273 | 0.898271 | 1.199665 | 1.161709 | 1.024637 | 1.009356 | 1.030219 | 1.172065 | 1.157667 | 0.994026 | 1.08918889 |
| SYNGR1    | O43759     | 1.319431 | 0.804308 | 1.320146 | 1.224932 | 1.167912 | 1.035578 | 0.816876 | 1.23856  | 1.196967 | 0.85045  | 1.09751607 |
| TPD52L1   | J3KNE7     | 0.653442 | 0.940371 | 1.047516 | 0.978612 | 0.800339 | 0.92899  | 0.987402 | 0.879214 | 1.051103 | 0.983664 | 0.92506509 |
| HMGA1     | P17096     | 0.84306  | 0.989842 | 0.521776 | 0.779594 | 0.732557 | 0.944323 | 0.92569  | 0.253325 | 0.78517  | 0.98503  | 0.77603671 |
| MAGED2    | Q9UNF1     | 0.956149 | 1.035928 | 0.833066 | 0.933034 | 1.035912 | 1.050616 | 0.792524 | 0.665613 | 0.876825 | 0.938127 | 0.91177949 |
| HMGA1     | P17096-3   | 0.84306  | 0.989842 | 0.487972 | 0.758711 | 0.732557 | 0.932399 | 0.92569  | 0.253325 | 0.78517  | 0.98503  | 0.76937562 |
| PMPCB     | O75439     | 1.094737 | 0.946204 | 1.169416 | 1.220759 | 1.014    | 1.156244 | 1.023984 | 1.160509 | 0.898955 | 1.120737 | 1.08055444 |
| ALCAM     | Q13740     | 0.825378 | 1.055344 | 0.889465 | 0.906136 | 0.881804 | 0.82012  | 1.019461 | 1.145379 | 0.86835  | 0.911524 | 0.93229617 |
| PMPCB     | G3V0E4     | 1.094737 | 0.946204 | 1.150063 | 1.196868 | 0.990155 | 1.183724 | 1.025211 | 1.155254 | 0.898955 | 1.120737 | 1.07619081 |
| RNMT      | O43148-2   | 1.383565 | 1.050749 | 0.950342 | 0.940615 | 1.082687 | 1.21645  | 0.870119 | 0.975564 | 1.025295 | 0.99539  | 1.04907768 |
| ALCAM     | Q13740-2   | 0.823093 | 1.05062  | 0.888532 | 0.903952 | 0.879934 | 0.819497 | 1.019461 | 1.145379 | 0.869348 | 0.923146 | 0.93229619 |
| HNRNPA2B1 | P22626     | 0.962612 | 1.015066 | 0.923806 | 0.878006 | 0.81432  | 0.907266 | 0.852454 | 0.884111 | 0.976186 | 0.999285 | 0.92131121 |
| ITGA3     | P26006-1   | 0.265218 | 0.625671 | 0.632632 | 0.889337 | 0.59527  | 0.744771 | 0.808274 | 0.968745 | 0.85371  | 1.148774 | 0.75324027 |
| ACO2      | A2A274     | 1.158039 | 1.011638 | 1.081797 | 1.252741 | 1.109753 | 1.03026  | 1.020519 | 1.133988 | 0.963604 | 0.915857 | 1.06781967 |
| ACO2      | Q99798     | 1.158997 | 1.011841 | 1.081797 | 1.252741 | 1.109753 | 1.03026  | 1.020519 | 1.133988 | 0.963604 | 0.915857 | 1.0679357  |
| MYH7B     | A0A087X0T3 | 0.805382 | 0.26581  | 0.475307 | 0.19583  | 0.826957 | 0.837833 | 0.520002 | 0.739283 | 0.80592  | 0.839974 | 0.63122973 |
| GK        | P32189     | 1.269705 | 1.064854 | 1.290385 | 1.158029 | 1.019812 | 1.078081 | 1.186888 | 1.169049 | 1.09391  | 0.782935 | 1.11136477 |
| EPB41L3   | Q9Y2J2-2   | 1.306752 | 1.067091 | 1.048784 | 1.140823 | 0.808042 | 1.043019 | 1.288739 | 0.910533 | 1.004111 | 0.993243 | 1.06111371 |
| CLTC      | A0A087WVQ  | 1.155585 | 0.932477 | 1.093372 | 1.059951 | 1.01957  | 1.033852 | 1.027416 | 1.023774 | 1.101206 | 0.906734 | 1.03539362 |
| EFR3B     | Q9Y2G0     | 1.135182 | 0.88405  | 1.098924 | 1.101858 | 1.14736  | 1.017894 | 0.95867  | 1.030344 | 1.209415 | 1.069135 | 1.06528322 |
| C9orf142  | Q9BUH6     | 0.881237 | 0.922638 | 0.824225 | 0.935193 | 0.705598 | 0.844144 | 0.955699 | 1.13771  | 0.817111 | 0.732502 | 0.87560585 |
| GRIPAP1   | Q4V328     | 1.038763 | 0.92834  | 1.053237 | 1.013481 | 1.012554 | 1.116834 | 1.048968 | 0.987772 | 0.996693 | 1.005054 | 1.02016955 |
| SHMT1     | P34896     | 0.892456 | 0.991479 | 0.669616 | 0.731491 | 0.466971 | 1.171918 | 0.774386 | 0.713673 | 0.852221 | 0.987889 | 0.82521    |
| TTC19     | Q6DKK2     | 1.265848 | 1.111839 | 1.27586  | 1.100367 | 1.248314 | 1.151552 | 0.97388  | 0.856153 | 0.738212 | 1.292682 | 1.10147072 |
| SYNJ1     | C9JFZ1     | 1.068808 | 0.919514 | 0.951442 | 1.063968 | 1.043956 | 1.041551 | 1.022535 | 1.008137 | 0.994142 | 1.015181 | 1.01292345 |
| CTNNA1    | P35221     | 0.713012 | 0.90634  | 0.838384 | 0.907065 | 1.123717 | 0.938803 | 0.975673 | 0.961333 | 0.809368 | 1.064171 | 0.92378648 |
| WBP2      | Q969T9     | 1.088165 | 1.086007 | 0.992717 | 1.161002 | 1.089341 | 1.185037 | 1.301549 | 0.883391 | 1.003765 | 0.863131 | 1.06541065 |
| FSD1      | Q9BTV5     | 1.038018 | 0.981303 | 1.10803  | 1.194291 | 1.027878 | 0.968417 | 1.067453 | 1.194496 | 1.124949 | 1.147802 | 1.08526378 |
| ANK2      | I6L894     | 1.047036 | 0.855445 | 0.905491 | 0.949838 | 0.730354 | 0.813448 | 0.943795 | 0.916919 | 0.759856 | 0.939569 | 0.88617502 |
| MRPL39    | Q9NYK5     | 1.054793 | 0.917321 | 1.244507 | 1.660206 | 1.084126 | 1.223339 | 1.134735 | 1.025066 | 1.072843 | 1.328796 | 1.17457317 |
| SBF1      | O95248-4   | 1.035128 | 0.99362  | 1.044464 | 1.043276 | 0.961228 | 1.001315 | 0.944373 | 1.023541 | 1.079678 | 0.966997 | 1.00936201 |

| Gene    | Accession | CTL1     | CTL2     | CTL3     | CTL4     | CTL5     | CTL6     | CTL7     | CTL8     | CTL9     | CTL10    | Average    |
|---------|-----------|----------|----------|----------|----------|----------|----------|----------|----------|----------|----------|------------|
| ANKRD28 | O15084-1  | 1.069024 | 0.975288 | 1.112816 | 1.092544 | 1.075491 | 0.945504 | 1.220151 | 1.013268 | 0.935493 | 1.170423 | 1.06100017 |
| YIF1B   | Q5BJH7    | 1.03661  | 1.153094 | 2.353134 | 2.762054 | 0.901918 | 0.773379 | 0.860336 | 0.817086 | 0.932774 | 1.680723 | 1.32711068 |
| MAPT    | P10636-8  | 0.942137 | 0.279839 | 0.841558 | 1.565889 | 0.212265 | 0.207708 | 0.689345 | 0.263393 | 0.817007 | 0.932658 | 0.6751798  |
| TECPR1  | Q7Z6L1-4  | 1.121432 | 1.253836 | 1.071796 | 0.989419 | 1.105846 | 1.25108  | 1.088894 | 1.053241 | 0.976324 | 1.050645 | 1.09625122 |
| GGA3    | Q9NZ52    | 0.924177 | 0.988958 | 0.93763  | 1.034003 | 0.849322 | 1.152332 | 0.85081  | 0.984179 | 1.31184  | 0.981004 | 1.00142558 |
| MAST3   | O60307    | 1.02722  | 0.963522 | 1.129141 | 0.978274 | 1.047294 | 1.179439 | 1.368618 | 1.049683 | 0.946535 | 1.177982 | 1.0867709  |
| HMGCS1  | Q01581    | 1.167005 | 1.074165 | 0.934854 | 0.984166 | 1.533064 | 1.84348  | 1.071865 | 0.846098 | 0.818693 | 1.133262 | 1.14066518 |
| GOPC    | Q9HD26    | 1.073681 | 1.036765 | 1.269553 | 1.175275 | 0.876286 | 0.975617 | 1.036139 | 1.03462  | 1.150064 | 1.179175 | 1.08071747 |
| MAPRE3  | Q9UPY8    | 1.116348 | 0.996201 | 0.995294 | 1.021998 | 0.992127 | 1.062743 | 1.124587 | 0.951306 | 1.091053 | 1.011083 | 1.03627402 |
| GAB1    | Q13480-2  | 0.853424 | 1.248649 | 0.826487 | 0.750778 | 0.721913 | 0.834932 | 0.999283 | 0.233357 | 0.799463 | 1.170784 | 0.84390702 |
| MORF4L2 | Q15014    | 1.115874 | 0.874314 | 0.811466 | 0.664362 | 0.998974 | 0.72648  | 0.924783 | 0.954043 | 1.049136 | 1.010792 | 0.91302239 |
| ITGB4   | P16144    | 0.802372 | 0.826319 | 0.930814 | 0.95317  | 0.998717 | 0.793111 | 0.744123 | 0.825658 | 0.783852 | 1.074064 | 0.8732199  |
| HTRA2   | O43464    | 0.998072 | 0.983454 | 0.910565 | 0.957936 | 1.186812 | 1.071826 | 0.859691 | 1.126144 | 1.152172 | 0.978119 | 1.02247896 |
| LAMP2   | P13473-3  | 0.276226 | 1.186829 | 0.896126 | 0.816581 | 0.748565 | 0.666594 | 0.971318 | 0.861816 | 0.872574 | 1.242412 | 0.853904   |
| PPP1R3F | Q6ZSY5    | 0.985041 | 1.220262 | 1.101778 | 1.001425 | 1.131839 | 1.309457 | 0.973221 | 1.094513 | 1.051006 | 0.854266 | 1.07228092 |
| AIFM1   | O95831    | 1.015029 | 0.991772 | 1.102042 | 1.123218 | 1.039121 | 1.042209 | 0.958747 | 1.241296 | 1.077928 | 0.92238  | 1.05137405 |
| GABBR1  | Q9UBS5    | 1.219743 | 0.864407 | 1.063918 | 1.052318 | 1.016549 | 1.119897 | 0.902416 | 1.084367 | 1.175475 | 0.969315 | 1.04684048 |
| DLGAP4  | Q9Y2H0-1  | 1.182711 | 0.892155 | 1.080688 | 1.111654 | 1.166493 | 1.073348 | 1.100566 | 0.869479 | 1.035727 | 0.981958 | 1.04947801 |
| WASF1   | Q92558    | 1.189253 | 0.924397 | 0.999262 | 1.073988 | 1.049753 | 1.085148 | 0.926108 | 0.929687 | 1.131721 | 0.953451 | 1.02627692 |
| RBBP7   | Q16576-2  | 0.800285 | 0.879366 | 0.973769 | 1.021508 | 0.884895 | 0.979872 | 0.739283 | 0.869801 | 0.944617 | 0.866718 | 0.89601155 |
| STK11   | Q15831    | 1.06578  | 1.020842 | 1.196345 | 1.215127 | 1.041238 | 1.077028 | 1.036733 | 1.016164 | 1.000944 | 1.068128 | 1.07383291 |
| MPV17   | P39210    | 1.105241 | 1.024033 | 1.598791 | 1.000119 | 1.004374 | 1.08984  | 0.954551 | 1.249577 | 0.859417 | 0.930777 | 1.08167195 |
| FLII    | Q13045    | 0.942908 | 1.027433 | 1.029655 | 1.077654 | 1.062444 | 0.982483 | 0.965985 | 1.055573 | 1.056317 | 1.001264 | 1.02017163 |
| MAP7    | Q14244    | 0.884525 | 1.172714 | 1.026553 | 1.458592 | 0.924336 | 1.204705 | 0.819293 | 0.656596 | 0.870143 | 1.139826 | 1.01572828 |
| ZNF207  | X6R4W8    | 0.976153 | 0.887926 | 0.894144 | 0.981109 | 1.085268 | 1.071979 | 0.944007 | 0.830218 | 0.898685 | 0.955864 | 0.95253515 |
| ARFGAP1 | Q8N6T3-2  | 1.229528 | 0.916876 | 1.027304 | 1.03638  | 1.041473 | 0.968036 | 1.001463 | 0.967467 | 0.948115 | 0.891861 | 1.00285039 |
| MAP4    | P27816    | 0.868991 | 1.263237 | 0.643334 | 0.833552 | 0.731891 | 0.943303 | 1.021039 | 0.222629 | 0.848634 | 1.273642 | 0.86502524 |
| PCM1    | Q15154    | 1.177606 | 1.131513 | 1.040623 | 1.094407 | 1.136699 | 1.130508 | 0.938149 | 0.9206   | 1.006819 | 1.017012 | 1.05939362 |
| PCIF1   | Q9H4Z3    | 0.589251 | 0.984811 | 0.668633 | 0.530163 | 1.090699 | 0.606088 | 1.045569 | 0.983039 | 0.931642 | 0.80665  | 0.82365446 |
| TIMM21  | Q9BVV7    | 1.084047 | 1.034119 | 1.110429 | 1.346106 | 1.21661  | 0.876208 | 0.877987 | 0.99388  | 0.93699  | 0.993979 | 1.04703537 |
| VCAN    | P13611    | 0.28143  | 1.577665 | 0.707355 | 0.7278   | 0.772073 | 0.644862 | 1.360672 | 0.573336 | 0.696612 | 1.218049 | 0.85598513 |
| NONO    | Q15233    | 0.980933 | 0.949861 | 1.102117 | 0.842965 | 0.873406 | 1.017629 | 0.850607 | 0.809088 | 0.977278 | 0.979949 | 0.93838338 |

| Gene    | Accession | CTL1     | CTL2     | CTL3     | CTL4     | CTL5     | CTL6     | CTL7     | CTL8     | CTL9     | CTL10    | Average    |
|---------|-----------|----------|----------|----------|----------|----------|----------|----------|----------|----------|----------|------------|
| SRRT    | Q9BXP5    | 0.968278 | 0.984522 | 0.85525  | 0.840594 | 0.843216 | 0.888237 | 0.856639 | 1.072673 | 0.980982 | 1.026186 | 0.93165767 |
| RBBP7   | Q16576    | 0.800285 | 0.879366 | 0.973769 | 1.021508 | 0.88261  | 0.963917 | 0.732911 | 0.854604 | 0.954126 | 0.8803   | 0.89433956 |
| CARM1   | Q86X55    | 1.053953 | 0.937895 | 0.963613 | 1.035081 | 1.072094 | 1.08799  | 1.07192  | 0.953037 | 0.946374 | 1.171035 | 1.02929924 |
| MRPL2   | Q5T653    | 1.29099  | 1.089969 | 1.367969 | 0.984811 | 1.485465 | 1.791591 | 0.822488 | 1.026214 | 0.780984 | 0.895278 | 1.15357583 |
| SH3GLB2 | Q9NR46-2  | 1.36779  | 0.891975 | 0.883392 | 1.161595 | 0.837697 | 1.200621 | 1.144959 | 0.935222 | 1.151753 | 0.967716 | 1.05427183 |
| UFD1L   | Q92890-1  | 1.007687 | 1.058666 | 0.806054 | 0.905075 | 0.936483 | 1.070563 | 0.890119 | 0.778491 | 0.933144 | 1.10803  | 0.94943116 |
| DPM1    | HOY368    | 1.244742 | 1.206534 | 1.009903 | 1.015315 | 0.927117 | 1.048491 | 1.042696 | 0.957659 | 1.292375 | 1.031031 | 1.07758624 |
| PPP6R2  | O75170-5  | 1.074903 | 1.126207 | 0.966513 | 0.967591 | 1.033023 | 1.091215 | 1.054092 | 0.96253  | 1.025946 | 0.992396 | 1.02944163 |
| SLC27A4 | Q6P1M0    | 1.095441 | 0.965265 | 1.231368 | 0.947772 | 1.124061 | 1.058132 | 1.014465 | 0.985055 | 0.947536 | 0.82881  | 1.01979051 |
| PTGDS   | P41222    | 0.386804 | 1.352947 | 0.732636 | 0.663079 | 0.930959 | 0.826336 | 1.357569 | 0.816876 | 0.708824 | 1.027449 | 0.88034786 |
| RAD50   | Q92878-2  | 0.746366 | 1.019471 | 0.875465 | 0.938129 | 1.059004 | 0.902855 | 1.047947 | 1.003904 | 0.726455 | 0.959675 | 0.92792708 |
| MAP4    | P27816-7  | 0.999275 | 1.590821 | 0.340267 | 1.159898 | 0.467664 | 1.162504 | 1.098107 | 0.202188 | 0.788464 | 1.456514 | 0.92657014 |
| UPF1    | Q92900    | 0.950662 | 0.872975 | 1.005705 | 0.96062  | 0.951776 | 0.936093 | 0.953493 | 0.950577 | 1.017261 | 0.883039 | 0.94822026 |
| PRAF2   | O60831    | 0.995887 | 0.900462 | 1.076104 | 1.006494 | 1.226081 | 1.228236 | 1.092521 | 0.998371 | 1.19405  | 0.981708 | 1.06999134 |
| LONP1   | P36776    | 1.09225  | 0.931888 | 1.103928 | 1.038595 | 1.021219 | 0.920626 | 0.996507 | 1.166207 | 0.96725  | 0.964056 | 1.0202524  |
| CACNA1A | A0A087WW6 | 1.270355 | 0.894042 | 0.976883 | 1.130586 | 0.87533  | 1.160375 | 0.951306 | 1.199608 | 1.209793 | 0.847517 | 1.05157965 |
| MPRIIP  | HOY2S9    | 1.247315 | 0.815951 | 1.028488 | 1.015607 | 1.061475 | 1.09388  | 1.072926 | 0.959041 | 1.072692 | 1.092754 | 1.04601292 |
| DLG1    | Q12959-9  | 1.1434   | 0.934466 | 1.09041  | 1.113388 | 0.996118 | 1.017356 | 1.101367 | 0.903016 | 0.965364 | 1.102603 | 1.03674866 |
| ACTR1B  | P42025    | 1.145044 | 1.026131 | 1.005191 | 0.909147 | 1.122056 | 1.110964 | 1.123952 | 0.935032 | 1.077444 | 1.106532 | 1.05614943 |
| ZER1    | Q7Z7L7    | 0.869876 | 0.772758 | 0.908455 | 0.958538 | 1.053236 | 0.909371 | 0.888928 | 0.855756 | 0.913288 | 1.051915 | 0.9182122  |
| SPTBN4  | Q9H254    | 0.937052 | 1.153359 | 1.173116 | 1.089798 | 1.011413 | 1.038847 | 1.227664 | 1.06545  | 1.001139 | 1.10954  | 1.08073798 |
| SRRT    | Q9BXP5-3  | 0.969793 | 0.97575  | 0.85525  | 0.840594 | 0.830822 | 0.894185 | 0.856639 | 1.072673 | 0.980982 | 1.026186 | 0.9302872  |
| SPTBN4  | C9JY79    | 0.935015 | 1.152857 | 1.170552 | 1.082778 | 1.011413 | 1.038847 | 1.226596 | 1.066073 | 1.006603 | 1.107233 | 1.07979667 |
| PPP6R2  | O75170    | 1.074903 | 1.126207 | 0.966513 | 0.967591 | 1.040552 | 1.099998 | 1.054092 | 0.96253  | 1.025946 | 0.992396 | 1.03107285 |
| TNPO3   | Q9Y5L0    | 1.054129 | 1.202104 | 1.143733 | 1.178979 | 0.950474 | 1.037898 | 1.096111 | 1.024238 | 1.098395 | 0.925303 | 1.07113639 |
| MAPK14  | Q16539    | 0.789222 | 0.94673  | 1.016703 | 0.691617 | 0.930757 | 0.207708 | 0.980951 | 0.879316 | 0.856442 | 0.782012 | 0.80814592 |
| SAFB2   | Q14151    | 1.041175 | 1.041218 | 0.786742 | 0.862758 | 0.699628 | 1.212008 | 0.726106 | 0.279648 | 0.905879 | 1.023199 | 0.85783612 |
| APOL2   | J3KQL8    | 1.04328  | 1.427275 | 1.116243 | 1.213854 | 1.132685 | 0.945841 | 0.693686 | 1.100239 | 1.44826  | 0.894749 | 1.10161122 |
| LARS    | Q9P2J5    | 0.954544 | 0.956674 | 1.16718  | 1.177228 | 1.102809 | 1.061241 | 0.917858 | 0.988257 | 1.010484 | 0.980682 | 1.03169569 |
| EML2    | O95834-3  | 0.832318 | 0.838026 | 1.013127 | 1.221058 | 0.949119 | 0.892862 | 0.71152  | 0.875751 | 0.86638  | 0.911768 | 0.91119296 |
| UBA5    | Q9GZZ9    | 0.990865 | 1.004284 | 0.913899 | 0.921015 | 0.879332 | 0.924895 | 1.08205  | 0.907062 | 0.893512 | 0.827799 | 0.9344712  |
| GIT1    | Q9Y2X7-3  | 1.154602 | 0.927418 | 1.030053 | 1.002737 | 1.006042 | 0.977043 | 1.03352  | 1.025954 | 1.140953 | 0.961145 | 1.02594677 |

| Gene  | Accession | CTL1     | CTL2     | CTL3     | CTL4     | CTL5     | CTL6     | CTL7     | CTL8     | CTL9     | CTL10    | Average    |
|-------|-----------|----------|----------|----------|----------|----------|----------|----------|----------|----------|----------|------------|
| COG1  | Q8WTW3    | 1.029911 | 1.030753 | 1.108491 | 1.131928 | 1.208712 | 1.238495 | 1.050998 | 0.922327 | 1.121355 | 0.897187 | 1.07401578 |
| PSMB8 | P28062    | 0.779872 | 0.96713  | 0.889282 | 1.015793 | 1.446444 | 0.9013   | 1.075499 | 0.943314 | 0.848914 | 1.004398 | 0.9871946  |
| SAT2  | Q96F10    | 0.757877 | 0.706527 | 0.797562 | 1.052568 | 0.786396 | 0.682335 | 0.708931 | 0.980438 | 1.039899 | 0.894191 | 0.84067242 |
