# Supplementary material for: Increased intron retention is a post‐transcriptional signature associated with progressive aging and Alzheimer’s disease
Source: PubMed Central journal article supplement (PMC6516162; doi:10.1111/acel.12928), 2019-03-13
Supplement: ACEL-18-e12928-s012.pdf [file ACEL-18-e12928-s012.pdf]

**Table S11: Primers information and summary of sequencing reads***Primer set 1 for visualization on DNA gel*

| Gene    | Genomic Coordinates for IR | Forward Primer (5' - 3') | Reverse Primer (5' - 3') | IR Size | No IR Size |
|---------|----------------------------|--------------------------|--------------------------|---------|------------|
| Unc-89  | 24,003,890 – 24,003,956    | GCCCTCAAGTACGAAGTCA      | ATAAAGGTGAACAAGGGCGA     | 367     | 300        |
| l(2)efl | 23,685,382 – 23,685,475    | CATTCTGGATGTGCAGCAGT     | GTCACATCGTCCCTCTCCTC     | 279     | 186        |
| Bt      | 767,690 – 767,761          | GGCGAAGACGCTGATGAATA     | TACTGGGTTAGGGACGGT       | 282     | 210        |

*Primer set 2 for quantification by real-time PCR*

| Gene    | Genomic Coordinates for IR | Forward Primer (5' - 3')   | Reverse Primer (5' - 3') |
|---------|----------------------------|----------------------------|--------------------------|
| l(2)efl | 23,685,382 – 23,685,475    | CCAAGTGAGTCCGAATTCCA       | CATCACCTAGTGGAAGGATCA    |
| Bt      | 767,690 – 767,761          | ACATATTGTGCGTTTTTGGTATAA   | TGGAGCAGCTAAGAATTTTTCAA  |
| Unc-89  | 24,003,890 – 24,003,956    | TCGATGGGGTTTGTCTTCTAA      | AGTGGTCCTAAACGATTGCAG    |
| lbn     | 7,049,965 – 7,050,033      | AAAAGGTAAACACACTTGAGATTTCG | TCTGAAAACATGATCCAAACG    |
| HDAC4   | 13,270,320 – 13,270,390    | CTCAACGTAAGATATAGCTCGATC   | GAAGCACTGTCAAAGGATTAGG   |
| Zasp66  | 8,630,376 – 8,630,516      | CGAAGAAGCAAGTTGCCAAT       | TCAATTCGAACAAAATAGAAACGA |
| Actin   | internal control           | GGCGCAGAGCAAGCGTGGTA       | GGTGCCACACGCAGCTCAT      |

*RNA-sequencing reads*

| Sample | Raw Reads | Aligned Reads |
|--------|-----------|---------------|
| D10 r1 | 58559930  | 54438024      |
| D10 r2 | 39475158  | 36284218      |
| D10 r3 | 44246082  | 41966666      |
| D20 r1 | 51123462  | 47439424      |
| D20 r2 | 64452922  | 58841122      |
| D20r3  | 44216638  | 41528126      |
| D30 r1 | 45566308  | 41733466      |
| D30 r2 | 43029326  | 39630056      |
| D30 r3 | 44118280  | 41422530      |
| D50 r1 | 48787024  | 44293044      |
| D50 r2 | 52274082  | 45973894      |
| D50 r3 | 44340038  | 41248160      |

*MNase-seq aligned reads count (pooling of 2 replicates; after quality control and duplicates removal)*

|        |            |
|--------|------------|
| Day 10 | 34,616,136 |
| Day 50 | 34,322,840 |
